# Supplementary material for: Rational deployment of molecular markers for the benzenediol lactones and related compounds biosynthesis in filamentous fungi
Source: PeerJ. 2025 Dec 19;13:e20472. doi: 10.7717/peerj.20472 (PMC12721105; doi:10.7717/peerj.20472)
Supplement: Supplemental Information 1 — SM1 - List of model HR-PKS sequences used as templates for BLASTP search. SM2 - Designed primers and their predicted properties. SM3 - List of genomes analysed during in silico PCR. SM4 - List of analysed isolates. SM5 - In silico amplicons switching between predicted classes in cross-validation (resampling). SM6 - Detailed summary of phylogenetic placement of in silico amplicons, with added information about in silico amplicon position in the source genome. SM7 - Detailed summary of phylogenetic placement of experimental amplicons. SM8 - Outlier sequences detected during isolate screening. [file peerj-13-20472-s001.xlsx]

## Sheet: SM1 - BLASTP search template se
source_db	accession	metabolite	corresponding_gene	organism	citation	notes
NCBI/GenBank	ABB90283	zearalenone	zea2	Fusarium graminearum	Kim et al. 2005	-
NCBI/GenBank	AGC95324.1	dehydrocurvularin	curs1	Aspergillus terreus	Xu et al. 2013	-
NCBI/GenBank	AKQ49201	dehydrocurvularin	dhc3	Alternaria cinerariae	Cochrane et al. 2015a	-
NCBI/GenBank	ACM42406	radicicol	rads1	Chaetomium chiversii	Wang et al. 2008	-
NCBI/GenBank	AHV78245	lasiodiplodin	lasS1	Lasiodiplodia_theobromae	Xu et al. 2014	-
NCBI/GenBank	AHV78252	trans-resorcylide	resS1	Sarocladium zeae	Xu et al. 2014	-
NCBI/GenBank	A0A0Y0M151	cladosporin	cla2	Cladosporium cladosporioides	Cochrane et al. 2015b	-
UniProt/SwissProt	B3FWT3	hypothemycin	hpm8	Hypomyces subiculosus	Reeves et al. 2008	-
UniProt/SwissProt	B3FWU0	radicicol	rdc5	Metapochonia chlamydosporia	Reeves et al. 2008	-

## Sheet: SM2 - Designed primers
block	pair_id	het_dG	fwd_name	fwd_mean_Tm	fwd_hom_dG	fwd_seq	fwd_length	rev_name	rev_mean_Tm	rev_hom_dG	rev_seq	rev_length
hblock__1__1001	1	-6.5	hblock__1__1001_F1	60.5	-5.4	RVTTCTGGGACCTSCTSAAG	20	hblock__1__1001_R1	60.5	-5.2	RWAGTGSGAGATDCGGTTSG	20
hblock__1__1001	2	-5.2	hblock__1__1001_F2	60.5	-4.7	CAARAGYGGACGAGATGGCT	20	hblock__1__1001_R2	60.5	-6.8	TCGAGGAARTGNGAGATGCG	20
hblock__1__1001	3	-6.7	hblock__1__1001_F3	59.4	-3.6	GCCGAGCACTTTTGGGAYTT	20	hblock__1__1001_R3	59.4	-6.8	ASGCTGTGTTSASGGTRAAG	20
hblock__1__1001	4	-6.6	hblock__1__1001_F4	60.5	-6.8	GGCWTGKCWTGTCGHTTTSC	20	hblock__1__1001_R4	60.5	-4.9	AGACTKGAVGAGCASGCWGT	20
hblock__1__1001	5	-6.8	hblock__1__1001_F5	60.5	-3.6	GACGCCTTYCACCAYTCCAA	20	hblock__1__1001_R5	60.5	-4.2	GCSACSAGACTWGABGARCA	20
hblock__1__1001	6	-5.1	hblock__1__1001_F6	60.5	-5.1	CTSAAGRASGGCARAGATGC	20	hblock__1__1001_R6	60.5	-6.8	GAGCARGCWGTCTSRACWGT	20
hblock__1__1001	7	-6.6	hblock__1__1001_F7	59.4	-6.8	TGTMGWTTYCCTGGWGAWGST	21	hblock__1__1001_R7	59.4	-6.8	TCSTCGCWCRTWCCSAGAAT	21
hblock__1__1001	8	-1.6	hblock__1__1001_F8	59.4	-5.4	CATTTCACCACCCAAATCCAG	21	hblock__1__1001_R8	59.4	-6.3	ACTCGCCATCACGTATACTCT	21
hblock__1__1001	9	-6.6	hblock__1__1001_F9	60.5	-6.8	TGYCGWTTKSSTGGWGATGC	20	hblock__1__1001_R9	60.5	-6.6	SSWGATYCTGTTGGCGAGRA	20
hblock__1__1001	10	-6.7	hblock__1__1001_F10	61.5	-3.6	CRCTCTCGGTSCCTCASAAT	20	hblock__1__1001_R10	61.5	-5.4	GCCGTRGASACTGTCATGCT	20
hblock__1__1001	11	-6.8	hblock__1__1001_F11	60.5	-6.8	GGDCTDTCATGTCGWTTCCC	20	hblock__1__1001_R11	60.5	-6.6	SCSACBARACTGGASGAACA	20
hblock__1__1001	12	-4.4	hblock__1__1001_F12	59.4	-6.3	TTYTGGGASCTGYTGAAGAAC	21	hblock__1__1001_R12	59.4	-3.6	AGTGSGARATRCGGTTGGAWA	21
hblock__1__1001	13	-5	hblock__1__1001_F13	59.4	-5.4	AARTTCTGGGACWTGCTGRWG	21	hblock__1__1001_R13	59.4	-6.8	SGAKATRCGGTTSGAGATCAT	21
hblock__1__1001	14	-5.1	hblock__1__1001_F14	59.4	-6.1	SAACCCTTCMAARTTCTGGGA	21	hblock__1__1001_R14	59.4	-6.8	GTCSAAGAAGTGMGARATACG	21
hblock__1__1001	15	-6.7	hblock__1__1001_F15	60.5	-6.8	WSCTCVCCRTCSAAGTTCTG	20	hblock__1__1001_R15	60.5	-3.9	GCCATWYCCGAYTCWCCAGA	20
hblock__1__1001	16	-5.2	hblock__1__1001_F16	60.4	-5.4	GCWTGTCGYTWTCCTGGWGAT	21	hblock__1__1001_R16	59.4	-6.8	AGAYWCGGTTSGAGATCAKCT	21
hblock__1__1001	17	-3.4	hblock__1__1001_F17	59.4	-6.8	TWGGCTTGTCWTGYCGMTTTC	21	hblock__1__1001_R17	59.4	-3.6	SAGRTGGTAYTTGGGGTAGTT	21
hblock__1__1001	18	-3.6	hblock__1__1001_F18	61.5	-3.6	AAGAYGCCTTCCACCACCCA	20	hblock__1__1001_R18	61.5	-5.2	CTCYGACTCGCCWGACTGWA	20
hblock__1__1001	19	-4.7	hblock__1__1001_F19	61.5	-3.6	CRGACGCTTTCTACCACCCA	20	hblock__1__1001_R19	61.5	-6.2	GCCATGAGRCTTGASGAGCA	20
hblock__1__1001	20	-5	hblock__1__1001_F20	59.4	-6.3	AGGCGATGAYATTGCCGTYAT	21	hblock__1__1001_R20	59.4	-6.4	SAKGTTGAAGAACCACGARAC	21
hblock__1001__2001	1	-6.5	hblock__1001__2001_F1	60.5	-6.6	ACWCARGGWGTBACSATGCC	20	hblock__1001__2001_R1	60.5	-4.7	CCAAADCCRCTSACGCTCAT	20
hblock__1001__2001	2	-6.2	hblock__1001__2001_F2	60.5	-4.7	CTCARYAACCTGGGCTTCCT	20	hblock__1001__2001_R2	60.5	-6.9	AGRACGATGTGRGCGTTGGT	20
hblock__1001__2001	3	-6.8	hblock__1001__2001_F3	60.5	-6.4	CTYTCCAACCAGCRGTTCCT	20	hblock__1001__2001_R3	60.5	-6.8	GCRTCGTCGAGWATSRSATG	20
hblock__1001__2001	4	-6.8	hblock__1001__2001_F4	60.5	-5.4	TGYGGCATSGTSGTBCTCAA	20	hblock__1001__2001_R4	60.5	-6.3	CGAARCTGCTGACRCTCATG	20
hblock__1001__2001	5	-4.9	hblock__1001__2001_F5	59.4	-6.3	CAACTTGWCGTTYCTCAAYCC	21	hblock__1001__2001_R5	59.4	-4.9	CAAAKCCACTGACASTCATYC	21
hblock__1001__2001	6	-6.7	hblock__1001__2001_F6	60.5	-6.7	SATCYTGAAGCGGCTKGASA	20	hblock__1001__2001_R6	60.5	-3.6	GTDCCWCCCATACCRAAWSC	20
hblock__1001__2001	7	-3.6	hblock__1001__2001_F7	60.5	-3.6	CAACGAYGGTGATGGBTACG	20	hblock__1001__2001_R7	60.5	-6.8	GCGAARGASGASACRSWCAT	20
hblock__1001__2001	8	-3.6	hblock__1001__2001_F8	57.4	-6.8	TTATCATGTCCATGTCGAGCT	21	hblock__1001__2001_R8	57.4	-3.6	TTGCGTACTTCTTTCCTCTTG	21
hblock__1001__2001	9	-5.5	hblock__1001__2001_F9	59.4	-4.7	ATGTAYCTSTCCAAYCAAGGG	21	hblock__1001__2001_R9	59.4	-4.5	MWCCRAACGAGTTGACACTSA	21
hblock__1001__2001	10	-6.2	hblock__1001__2001_F10	60.5	-3.6	GGSTTCACKCARGGSTTTAC	20	hblock__1001__2001_R10	60.5	-5.2	CCGCCRACRCCAAAGTTGTT	20
hblock__1001__2001	11	-6.9	hblock__1001__2001_F11	60.5	-6.8	ACNCARTACGTSGAGGCWCA	20	hblock__1001__2001_R11	60.5	-6.7	GGCTGCTGAASACRAABAGC	20
hblock__1001__2001	12	-6.5	hblock__1001__2001_F12	60.5	-6.2	ACWCAGGGYGTMACWATGCC	20	hblock__1001__2001_R12	60.3	-4.8	CTRCTSAASACGAARAGTCTCT	20
hblock__1001__2001	13	-3.6	hblock__1001__2001_F13	60.3	-6.8	GWGATYCCATTCGAGCYGTTAT	22	hblock__1001__2001_R13	60.3	-5.4	CYGCCATRTTCCATTCTTSTAG	22
hblock__1001__2001	14	-5	hblock__1001__2001_F14	60.5	-6.3	GACCMMATCCGAGCWGTSAT	20	hblock__1001__2001_R14	60.5	-5	GCCTCCGWASCCAAAYGART	20
hblock__1001__2001	15	-6.5	hblock__1001__2001_F15	60.5	-3.6	AACCAGGACGGAYWCACSMA	20	hblock__1001__2001_R15	60.5	-6.8	TCGTCGAGKATRGCATGWGC	20
hblock__1001__2001	16	-6.6	hblock__1001__2001_F16	60.5	-6.2	ACMCAAGGHGTTACSATGCC	20	hblock__1001__2001_R16	60.5	-3.6	GTMCCWCCCATWCCAAABCC	20
hblock__1001__2001	17	-5.1	hblock__1001__2001_F17	60.5	-6.9	GGWGAGGGYTGTGGMATSAT	20	hblock__1001__2001_R17	60.5	-6.7	GRCTGCTGARSACGAASAGT	20
hblock__1001__2001	18	-6.8	hblock__1001__2001_F18	60.5	-6.8	GTDACDATGCCGTCTCTSGA	20	hblock__1001__2001_R18	60.5	-5.4	GTTTGTSCCDCCCATRCCAA	20
hblock__1001__2001	19	-6.6	hblock__1001__2001_F19	60.5	-6.8	YCTSAARCCWCTSGACSAAG	20	hblock__1001__2001_R19	60.3	-5.8	CATTWGTSCCWCCAWARCCRAA	20
hblock__1001__2001	20	-3.3	hblock__1001__2001_F20	60.5	-3.6	TCCAACCAGCAGTTCCTGTC	20	hblock__1001__2001_R20	60.5	-3.6	GTWCCKCCATASCCAAADCC	20
hblock__1501__2501	1	-6.8	hblock__1501__2501_F1	60.5	-4.6	SATCCCGCCMAACATCCAYT	20	hblock__1501__2501_R1	60.5	-4.6	GTGAASACRAASCCRATSCG	20
hblock__1501__2501	2	-6.6	hblock__1501__2501_F2	60.5	-6.5	GACGARTGGAACRTSGCTGT	20	hblock__1501__2501_R2	60.5	-3.9	GCWCCYTGWCCWGTGAANAC	20
hblock__1501__2501	3	-3.2	hblock__1501__2501_F3	61.5	-3.4	CTGGGAGGARTGGCATCTCA	20	hblock__1501__2501_R3	61.5	-6.8	CTCGACGCTTTGGCGRAASA	20
hblock__1501__2501	4	-6.6	hblock__1501__2501_F4	60.5	-4.6	GTSCTKGCTATGGARAACGG	20	hblock__1501__2501_R4	60.5	-6.8	ARTTCYTCGACAGGGTCCCA	20
hblock__1501__2501	5	-7	hblock__1501__2501_F5	59.4	-3.9	GGYRAGCATCAACAACTTTGG	21	hblock__1501__2501_R5	59.4	-3.9	WCCWGTRWAGACGAASCCRAT	21
hblock__1501__2501	6	-5.1	hblock__1501__2501_F6	60.5	-6.9	GCWMTGGAGMACGGSWTSAT	20	hblock__1501__2501_R6	60.5	-5.1	DGCGAGGTTGGCRATGTACT	20
hblock__1501__2501	7	-6.6	hblock__1501__2501_F7	60.5	-5	YGGSTAYGGAGGAACSAATG	20	hblock__1501__2501_R7	60.5	-3.9	CGCHCCTTGWCCWGTRAAGA	20
hblock__1501__2501	8	-6.8	hblock__1501__2501_F8	60.3	-6.8	AYMTCAACTTCWCSAAGCCSAA	22	hblock__1501__2501_R8	60.5	-6.8	AWMAGCTCGATHCCCATSCG	22
hblock__1501__2501	9	-3.6	hblock__1501__2501_F9	58.4	-6.3	AACGGASTCATYCCACCAAAT	21	hblock__1501__2501_R9	58.4	-3.6	TCAAAGTATAAGCGAGGCGATT	21
hblock__1501__2501	10	-3.9	hblock__1501__2501_F10	60.5	-3.9	AASCCHAAYCCWGCCATWCC	20	hblock__1501__2501_R10	60.5	-5	CCHGTGWAGACRAASCCGAT	20
hblock__1501__2501	11	-5.6	hblock__1501__2501_F11	60.5	-4.6	GWYSCCACCAAACWKACACC	20	hblock__1501__2501_R11	60.5	-6.9	CCCTGWCCHGTGAASACRAA	20
hblock__1501__2501	12	-6.7	hblock__1501__2501_F12	60.5	-6.3	TKCCSACCAAGMTSACWCCT	20	hblock__1501__2501_R12	60.5	-6.8	ATVCCCATWCSWGCCCAYTG	20
hblock__1501__2501	13	-3.6	hblock__1501__2501_F13	60.5	-5.4	GATCCCRCCSAGCATCAAYT	20	hblock__1501__2501_R13	60.5	-5	TGWCCHGTGWAGACRAASCC	20
hblock__1501__2501	14	-5.2	hblock__1501__2501_F14	60.5	-6.9	GMACCAACGCCCACRTWATC	20	hblock__1501__2501_R14	60.5	-5.2	SCCTGHCCWGTGAASACRAA	20
hblock__1501__2501	15	-6.6	hblock__1501__2501_F15	60.5	-3.9	GGHTATGGWGGWACRAACGC	20	hblock__1501__2501_R15	60.5	-3.9	GCHCCTTGWCCWGTRAASAC	20
hblock__1501__2501	16	-6.6	hblock__1501__2501_F16	59.4	-6.3	TACATYCCGCCSCAGATGTT	20	hblock__1501__2501_R16	59.4	-6.2	GAGRTAGCCCTGGCACTTTT	20
hblock__1501__2501	17	-6.7	hblock__1501__2501_F17	60.5	-6.8	CRSACCAAGCGWATGASHGT	20	hblock__1501__2501_R17	60.5	-3.9	GCWCCYTGWCCHGTGAAWAC	20
hblock__1501__2501	18	-3.6	hblock__1501__2501_F18	60.5	-5.4	CYAACCCCGCMATTCCATTC	20	hblock__1501__2501_R18	60.5	-6.9	CCHGTGAAVACGAASCCGAT	20
hblock__1501__2501	19	-3.6	hblock__1501__2501_F19	60.5	-3.6	CTCATCCCDCCCAACATHCA	20	hblock__1501__2501_R19	60.5	-6.8	AYWCCCATWCKAGCCCACTG	20
hblock__1501__2501	20	-3.6	hblock__1501__2501_F20	60.5	-3.6	CTCATCCCRCCCAACATCMA	20	hblock__1501__2501_R20	60.5	-6.9	CCCTGWCCHGTGAASACRAA	20
hblock__2001__3001	1	-6.9	hblock__2001__3001_F1	60.5	-4.7	MGSATCGGVTTCGTSTTCAC	20	hblock__2001__3001_R1	60.5	-6.8	GGNGAGTTSACRCAAGCWAC	20
hblock__2001__3001	2	-6.8	hblock__2001__3001_F2	60.5	-6.8	CARTGGGCWSGWATGGGBAT	20	hblock__2001__3001_R2	60.5	-6.8	GGNGARTTGACACASGCWAC	20
hblock__2001__3001	3	-6.7	hblock__2001__3001_F3	60.5	-5.2	RTSGGSTTYGTSTTCACWGG	20	hblock__2001__3001_R3	60.5	-5.4	GCCATCATRCCWCCWTTSMG	20
hblock__2001__3001	4	-6.8	hblock__2001__3001_F4	60.5	-4.6	CGSATCGGVTTYGTSTTCAC	20	hblock__2001__3001_R4	60.5	-7	TGGTAGGCKACCTSGACYTT	20
hblock__2001__3001	5	-6.8	hblock__2001__3001_F5	60.4	-6.5	CSMATCTCAAATGGCAGACST	21	hblock__2001__3001_R5	60.5	-6.8	ACRCTKGWCGGSGAGTTGAT	21
hblock__2001__3001	6	-5	hblock__2001__3001_F6	60.5	-6.7	GAYCAAGCWGGSTTCAARCG	20	hblock__2001__3001_R6	60.5	-4.7	GARCAGATRGGCTGGCTGAT	20
hblock__2001__3001	7	-5	hblock__2001__3001_F7	60.5	-5.4	CARTGGGCTCGYATGGGWAT	20	hblock__2001__3001_R7	60.5	-6.3	GGWGAGTTSACRCAVGCWAC	20
hblock__2001__3001	8	-4.6	hblock__2001__3001_F8	60.4	-4.6	CTGGWAACGASATCACWCCYT	21	hblock__2001__3001_R8	60.4	-6.3	GCGATTGAACATCWGCTTKGC	21
hblock__2001__3001	9	-5	hblock__2001__3001_F9	60.5	-4.7	MGSATCGGVTTCGTSTTCAC	20	hblock__2001__3001_R9	60.5	-3.9	ATRTGGKSAGAGTGGTASGC	20
hblock__2001__3001	10	-5	hblock__2001__3001_F10	60.5	-6.8	GGAGCACARTGGGCWMGWAT	20	hblock__2001__3001_R10	60.5	-6.3	GGWGAGTTSACRCAVGCWAC	20
hblock__2001__3001	11	-4.9	hblock__2001__3001_F11	60.5	-6.8	AAYTCGCTCGTYCGACACCT	20	hblock__2001__3001_R11	60.5	-6.3	CTCWGCYTCWKCTCTGGAAC	20
hblock__2001__3001	12	-5.2	hblock__2001__3001_F12	60.5	-5	STTYGTCTTCACDGGWCAGG	20	hblock__2001__3001_R12	60.5	-6.2	VGGYGAGTTSACACAWGCSA	20
hblock__2001__3001	13	-5.5	hblock__2001__3001_F13	59.4	-6.8	BTTTGTSTTCACTGGDCAAGG	21	hblock__2001__3001_R13	59.4	-6.8	TSACACTRGWCGGTGAGTTRA	21
hblock__2001__3001	14	-6.7	hblock__2001__3001_F14	60.5	-5.1	CCWGAGATCAGCCARCCMAT	20	hblock__2001__3001_R14	60.5	-6.8	ATGTGYGASSWRTGGTASGC	20
hblock__2001__3001	15	-6.8	hblock__2001__3001_F15	60.5	-6.3	WCGKSTBGGSTTCGTCTTCA	20	hblock__2001__3001_R15	60.5	-4	GGCGAGTGATATGCKGTRTC	20
hblock__2001__3001	16	-4.7	hblock__2001__3001_F16	60.5	-6.8	SATGGGDATCGAGYTGWTGG	20	hblock__2001__3001_R16	60.5	-6.3	GGTGACGYTGGAWGGRGAAT	20
hblock__2001__3001	17	-5	hblock__2001__3001_F17	60.5	-4.6	AGATCAGYCAGCCCATYTGC	20	hblock__2001__3001_R17	60.5	-6.8	CTGTGGTAMGCCATCTCRAC	20
hblock__2001__3001	18	-6.2	hblock__2001__3001_F18	60.5	-6.1	ACWGGWCARGGTGCYCAATG	20	hblock__2001__3001_R18	60.5	-6.8	SGARTGGTARGCGACATCGA	20
hblock__2001__3001	19	-6.7	hblock__2001__3001_F19	60.5	-5	GGSTTCGTCTWYACDGGWCA	20	hblock__2001__3001_R19	60.5	-3.9	ATRTGSTSCGAGTGRTAGGC	20
hblock__2001__3001	20	-6.8	hblock__2001__3001_F20	60.5	-6.8	CARTGGGCWVGWATGGGSAT	20	hblock__2001__3001_R20	60.5	-6.8	CRSWCGAWGGWGARTTGACG	20
hblock__2501__3501	1	-6.6	hblock__2501__3501_F1	59.4	-3.6	ATCAGCCAGCCYATCTGTWC	20	hblock__2501__3501_R1	59.4	-6.4	CAGRTTGCGWACCCARTAGWA	20
hblock__2501__3501	2	-6.7	hblock__2501__3501_F2	60.5	-5.4	RANGGWGGSATGATGGCWGT	20	hblock__2501__3501_R2	60.5	-6.8	SAGDATCTGCTYGACWGGWC	20
hblock__2501__3501	3	-6.4	hblock__2501__3501_F3	60.5	-6.8	GGDCATTCSAGYGGWGAGAT	20	hblock__2501__3501_R3	60.3	-4.6	ASAGWACAGGMGAGAYCAAGTT	20
hblock__2501__3501	4	-4.7	hblock__2501__3501_F4	62.5	-6.3	AAGCTGACCCGAGGACGAGT	20	hblock__2501__3501_R4	62.5	-4.7	GCCTGGAGGATCTGTTGGAC	20
hblock__2501__3501	5	-6.7	hblock__2501__3501_F5	60.5	-5.4	AASGGHGGBATGATGGCWGT	20	hblock__2501__3501_R5	60.5	-6.8	CCDATCTCDATSAGSAGGTC	20
hblock__2501__3501	6	-5.2	hblock__2501__3501_F6	60.5	-6.8	CCATTCSAGTGGBGAGATHG	20	hblock__2501__3501_R6	60.5	-5.4	RAASAGSACGGGMGASAWGA	20
hblock__2501__3501	7	-6.1	hblock__2501__3501_F7	59.4	-6.2	GAGWWCAGTCAGCCVATCTG	20	hblock__2501__3501_R7	59.4	-6.6	TTCTGGASCCAGTARWAGGG	20
hblock__2501__3501	8	-6.2	hblock__2501__3501_F8	60.5	-5.4	GAAATSWSCCAGCCMMTSTG	20	hblock__2501__3501_R8	60.5	-6.8	TAKGCGWYCTCGACCTTSAG	20
hblock__2501__3501	9	-6.8	hblock__2501__3501_F9	60.5	-6.7	GCWTACTTCMGWGGCAARGC	20	hblock__2501__3501_R9	60.5	-6.8	CCGATCTCRATSAGCAKGTC	20
hblock__2501__3501	10	-3.6	hblock__2501__3501_F10	60.5	-3.6	CTTAGGRGCAYTGACTCGTG	20	hblock__2501__3501_R10	60.5	-5	GAGAATCGSACAGGRTKGGT	20
hblock__2501__3501	11	-3.6	hblock__2501__3501_F11	60.5	-6.8	SAYTGTCGCYTGCGTCAACT	20	hblock__2501__3501_R11	60.5	-5.4	GCCATGTCCTCGTCRTTCRT	20
hblock__2501__3501	12	-3.9	hblock__2501__3501_F12	60.5	-4.6	GAGATCAGYCAGCCCATYTG	20	hblock__2501__3501_R12	60.5	-6.4	ASMAGGTTGCGDASCCAGTA	20
hblock__2501__3501	13	-5	hblock__2501__3501_F13	59.4	-5.5	GHCATTCWAGYGGWGAAATCG	21	hblock__2501__3501_R13	59.4	-5.4	SARATTGCGGACCCARTAGTA	21
hblock__2501__3501	14	-6.8	hblock__2501__3501_F14	60.5	-5.1	GGWCACTCHAGYGGTGAGAT	20	hblock__2501__3501_R14	60.5	-5.2	YNAGGTTWCGCACCCAGTWG	20
hblock__2501__3501	15	-6.8	hblock__2501__3501_F15	60.5	-3.6	NGGWGGWATGATGGCKGTTG	20	hblock__2501__3501_R15	60.5	-5.4	CRCTGTGWGGACCAAYTTCG	20
hblock__2501__3501	16	-7	hblock__2501__3501_F16	60.5	-5.4	MYCGTGGCAWGTGTGWWSTC	20	hblock__2501__3501_R16	60.3	-6.8	CCGATTTCSAKCATCAKGTCAA	20
hblock__2501__3501	17	-3.6	hblock__2501__3501_F17	60.5	-3.6	GAGRWGGCKGAGGAATGGWT	20	hblock__2501__3501_R17	60.5	-3.6	MGASTGGTAKGGGATGTTGG	20
hblock__2501__3501	18	-5.2	hblock__2501__3501_F18	60.5	-6.8	SCATTCVAGCGGNGAGATWG	20	hblock__2501__3501_R18	60.5	-4.6	GAASAGSACAGGNGAGAYCA	20
hblock__2501__3501	19	-6.1	hblock__2501__3501_F19	60.5	-6.8	GGDCATTCSAGYGGWGAGAT	20	hblock__2501__3501_R19	60.5	-5.4	TSAGRTTGCGACCCCARTAG	20
hblock__2501__3501	20	-6.3	hblock__2501__3501_F20	60.5	-3.9	CTGCGTSAACTCYCCGWMTA	20	hblock__2501__3501_R20	60.5	-6.8	GTGTGMSAGGATCTGCTYGA	20
hblock__3001__4001	1	-6.7	hblock__3001__4001_F1	60.5	-6.3	WSCTSGGTCCYTWYTACTGG	20	hblock__3001__4001_R1	60.5	-6.6	ACWGTRTGBTCACGSAGCCA	20
hblock__3001__4001	2	-5.2	hblock__3001__4001_F2	60.5	-5	WHCWACTGGGTGCGDAACCT	20	hblock__3001__4001_R2	60.5	-6.5	CTGNGTCTCGTCCATCATBG	20
hblock__3001__4001	3	-5.2	hblock__3001__4001_F3	60.5	-6.8	YTTCTCYGAAGCCGTSTCGA	20	hblock__3001__4001_R3	60.5	-6	GACCCYTGAATCTSRTGGTC	20
hblock__3001__4001	4	-6.4	hblock__3001__4001_F4	60.3	-6.4	CWTACTAYTGGSTTCGCAACYT	22	hblock__3001__4001_R4	60.5	-6.5	CTSGBTCTCRTCCATCATSG	22
hblock__3001__4001	5	-4.7	hblock__3001__4001_F5	60.5	-6.7	WKCTSGGTCCSTWCTAYTGG	20	hblock__3001__4001_R5	60.5	-4.7	AGGTACTCSTKBTGGATGCG	20
hblock__3001__4001	6	-5	hblock__3001__4001_F6	60.5	-6.4	SWACTGGGKWCGCAAYCTSA	20	hblock__3001__4001_R6	60.5	-6.1	CKGATGAAKCCWCGCCAWAC	20
hblock__3001__4001	7	-5	hblock__3001__4001_F7	59.4	-3.6	MTCCTTCCAYTCCTCGTTACA	21	hblock__3001__4001_R7	59.4	-7	GATGATRTTMCGCCAWGTTGG	21
hblock__3001__4001	8	-6.7	hblock__3001__4001_F8	60.5	-6.8	RTCGAGCAGATHCTSWCSCA	20	hblock__3001__4001_R8	60.5	-6.7	AGSACSATGCTRACSATRCC	20
hblock__3001__4001	9	-6.8	hblock__3001__4001_F9	60.5	-5	TGGTSTCBCCWGTYCTSTTC	20	hblock__3001__4001_R9	60.5	-6.3	SSMACRTCACGSAGCTTGWA	20
hblock__3001__4001	10	-3.6	hblock__3001__4001_F10	60.5	-3.6	ATCTCYCCTGTSCTYTTCGC	20	hblock__3001__4001_R10	60.5	-6.3	ACWCGCTCTSSYTCRTCCAT	20
hblock__3001__4001	11	-3.6	hblock__3001__4001_F11	60.5	-5	GACCMAYCCTGTSCGATTCT	20	hblock__3001__4001_R11	60.5	-4.7	GCTCCAACRAGACTGTARCG	20
hblock__3001__4001	12	-6.2	hblock__3001__4001_F12	61.5	-6.3	GTCCAGTCKCTCAGSCACAT	20	hblock__3001__4001_R12	61.5	-5	GACGATGACGCCMGTGATCT	20
hblock__3001__4001	13	-6.9	hblock__3001__4001_F13	60.5	-5.2	KCWTCCATCGCCGACMTWSA	20	hblock__3001__4001_R13	60.5	-5	GARTGGTTCCAGGGATASKG	20
hblock__3001__4001	14	-3.6	hblock__3001__4001_F14	62.1	-3.9	GATATACAGCCCCGAGAAGAGA	22	hblock__3001__4001_R14	62.1	-4.7	GTAGGTACTCCTTTTGGATGCG	22
hblock__3001__4001	15	-3.9	hblock__3001__4001_F15	62.5	-5	CTCGGTGCTTCCAACTGGGT	20	hblock__3001__4001_R15	62.5	-6.2	AATTGCCTCGGCGGTGCTGT	20
hblock__3001__4001	16	-4.6	hblock__3001__4001_F16	60.5	-6.5	ASGATGRTSTCGTCYGTCAC	20	hblock__3001__4001_R16	60.5	-3.5	GAAGGTCTTGSTGTGGTTCC	20
hblock__3001__4001	17	-4.6	hblock__3001__4001_F17	59.4	-4.4	TWCTACTGGGTCCGCAAYCT	20	hblock__3001__4001_R17	59.4	-6.8	CTTCGWGTGGGGAACTTYTG	20
hblock__3001__4001	18	-5.1	hblock__3001__4001_F18	60.5	-5.1	STTCTCCGAYGCCCTSAARA	20	hblock__3001__4001_R18	60.5	-6.7	YGCCTCWARCACCATGCTGA	20
hblock__3001__4001	19	-5.2	hblock__3001__4001_F19	59.4	-5.4	CWWYWACTGGGTSCGWAACC	20	hblock__3001__4001_R19	59.4	-6.3	TGCTGSSTCTCRTCCATCAT	20
hblock__3001__4001	20	-5.2	hblock__3001__4001_F20	60.5	-6.3	GAYGCTSTSAAGRAGCTGGT	20	hblock__3001__4001_R20	60.5	-5.4	WGCCAYRAASGASACATCSC	20
hblock__3501__4501	1	-6.6	hblock__3501__4501_F1	60.5	-6.8	TACSCCTGGAABCACWCSMA	20	hblock__3501__4501_R1	60.5	-6.4	GANACGSWRAACTCCCACCA	20
hblock__3501__4501	2	-7	hblock__3501__4501_F2	60.5	-6.9	CCAGCGTSAGWTKGTSWMTC	20	hblock__3501__4501_R2	60.5	-6.3	GSTGWABGTCTCGCCRATGT	20
hblock__3501__4501	3	-3.6	hblock__3501__4501_F3	60.5	-6.6	CARGGGTCYATCCTGTATCC	20	hblock__3501__4501_R3	60.5	-6.6	GWTCTCCGAATCKCMGTSAC	20
hblock__3501__4501	4	-6.6	hblock__3501__4501_F4	60.5	-6.8	TACSCCTGGAABCACWCSMA	20	hblock__3501__4501_R4	60.5	-6.4	GASATGGTMMACTCCCACCA	20
hblock__3501__4501	5	-6.6	hblock__3501__4501_F5	60.5	-6.6	CCWCCWTAYCCSTGGAAYCA	20	hblock__3501__4501_R5	60.5	-3.6	AAGTGCCCGYYGTACTGGAA	20
hblock__3501__4501	6	-3.9	hblock__3501__4501_F6	60.4	-5.1	GCACGACAACAAGTACAAYGC	21	hblock__3501__4501_R6	60.5	-6.3	YTCWACDCCCTGGAASAGCT	21
hblock__3501__4501	7	-3.4	hblock__3501__4501_F7	60.3	-5.4	YATCAATTTCGGGGCRATCAAC	22	hblock__3501__4501_R7	60.3	-3.1	CAATCCAACTYCTRTCCTTAGC	22
hblock__3501__4501	8	-6.5	hblock__3501__4501_F8	59.4	-6.5	MASAACGCCATGATGGACGA	20	hblock__3501__4501_R8	59.4	-6.3	STGWASGTCTCGCCAATRTC	20
hblock__3501__4501	9	-3.6	hblock__3501__4501_F9	59.4	-3.6	CCATCGCATCCAGAATCTTGT	21	hblock__3501__4501_R9	59.4	-3.6	AGGTAGGTCCRTAGTTKAGTC	21
hblock__3501__4501	10	-4.7	hblock__3501__4501_F10	62.5	-3.6	TGGCAGCACTCCCGCAAGTT	20	hblock__3501__4501_R10	62.5	-6.3	TCGCTCATAGGCAGCTCCTC	20
hblock__3501__4501	11	-5	hblock__3501__4501_F11	60.5	-3.6	CGWGTSTGGCGWGGHTTYAT	20	hblock__3501__4501_R11	60.5	-6.8	WGGRYGGCAGTWSTCAACWC	20
hblock__3501__4501	12	-5	hblock__3501__4501_F12	60.5	-5.4	GATYTGCCKCCSTATCCWTG	20	hblock__3501__4501_R12	60.5	-5	GAMGASACCGTRAASTCCCA	20
hblock__3501__4501	13	-5	hblock__3501__4501_F13	60.5	-3.9	CCCAAGGCTACRMAGTSAAC	20	hblock__3501__4501_R13	60.5	-6.8	SGASSTGGTKACGGTGAAYT	20
hblock__3501__4501	14	-5	hblock__3501__4501_F14	59.4	-6.3	TGGATGAGAGCCAGCATRTMT	21	hblock__3501__4501_R14	59.4	-3.9	RSTAAAGGTYTCGCCAATGTC	21
hblock__3501__4501	15	-5.2	hblock__3501__4501_F15	59.4	-5.4	GTWAATCTCTTYGCYGCCATG	21	hblock__3501__4501_R15	59.4	-6.8	YGTCTCTCCAAYATCGACAAG	21
hblock__3501__4501	16	-6.6	hblock__3501__4501_F16	60.5	-6.6	CCWCMVTATCCSTGGAASCA	20	hblock__3501__4501_R16	60.5	-5.5	GAAAGCCTCKCCGTATTYCC	20
hblock__3501__4501	17	-6.6	hblock__3501__4501_F17	60.5	-6.6	CCWCCMTATCCSTGGAABCA	20	hblock__3501__4501_R17	60.3	-6.8	WWGAGAYWGTGAACTCSMACCA	20
hblock__3501__4501	18	-5.2	hblock__3501__4501_F18	60.5	-6.8	CTYGAAGCAGCYCAGCAGWT	20	hblock__3501__4501_R18	60.5	-5.2	STRAARGTCTCSCCGATGTC	20
hblock__3501__4501	19	-6.4	hblock__3501__4501_F19	59.4	-7	HTGGAACCAYASCAAGACCTT	21	hblock__3501__4501_R19	59.4	-6.9	MTCTSGGTGACRTWCTSAAWG	21
hblock__3501__4501	20	-5.2	hblock__3501__4501_F20	60.5	-6.8	SCCATGMTSGACGAAASYCA	20	hblock__3501__4501_R20	60.4	-4.7	GSWGWATGTCTCGCCWATRTC	20
hblock__4001__5001	1	-3.9	hblock__4001__5001_F1	62.1	-5	CCAGTCGTCTTGGATGGAGTTT	22	hblock__4001__5001_R1	62.1	-5.4	GCATGTCAATGTCGGAGATGAG	22
hblock__4001__5001	2	-4.7	hblock__4001__5001_F2	60.5	-6.6	TACGASACCMTGACCARGTC	20	hblock__4001__5001_R2	60.5	-6.8	TCAAGCTCCGCAAGGCGAAA	20
hblock__4001__5001	3	-2	hblock__4001__5001_F3	60.5	-5.1	CAGATGGCAGAGGARGATRC	20	hblock__4001__5001_R3	60.5	-3.6	AKGTGATGTCGGTYGGGTCA	20
hblock__4001__5001	4	-6	hblock__4001__5001_F4	60.5	-6.4	TGGTGGGAGTKKACCATSTC	20	hblock__4001__5001_R4	60.5	-6.8	TYGWSCTGCTTGTCSTCGKT	20
hblock__4001__5001	5	-6.2	hblock__4001__5001_F5	60.5	-5.4	CTCVTGTGYTGGAACWGACC	20	hblock__4001__5001_R5	60.5	-6.2	GCRGABAACTCSTTGAAGCC	20
hblock__4001__5001	6	-3.5	hblock__4001__5001_F6	60.5	-3.1	GGGCTAAGGAYAGRAGTTGG	20	hblock__4001__5001_R6	60.5	-5.4	CWTGCTTGGCKTGRAGTGGT	20
hblock__4001__5001	7	-5	hblock__4001__5001_F7	60.5	-6.8	CTCATYGCCATYGACTACGC	20	hblock__4001__5001_R7	60.5	-6.3	CACGTCCATCCTGATCTCCA	20
hblock__4001__5001	8	-6.7	hblock__4001__5001_F8	60.5	-6.2	GTGGGASTTCACYSTSTCVT	20	hblock__4001__5001_R8	60.5	-7	KTSGGCASMAAWGGCTTSTC	20
hblock__4001__5001	9	-3.3	hblock__4001__5001_F9	58.4	-3.6	GGAGTAYAAGTCAGATGAAGG	21	hblock__4001__5001_R9	58.4	-3.6	CAATGTCGGCAGCAATRGTAA	21
hblock__4001__5001	10	-3.5	hblock__4001__5001_F10	59.4	-4.6	GTGGTGGGAGTTCCTRATCT	20	hblock__4001__5001_R10	59.4	-6.8	CACTRCGTCTCGAAACACAC	20
hblock__4001__5001	11	-5	hblock__4001__5001_F11	60.5	-5	TGGGASTTYACGGTSTCKTC	20	hblock__4001__5001_R11	60.5	-5.5	GTGCGGAAATCKKTCACGGA	20
hblock__4001__5001	12	-5.1	hblock__4001__5001_F12	60.5	-6.3	GAGCTGCCTRTGAGCGAMTT	20	hblock__4001__5001_R12	60.5	-3.6	CGGAYRGAGAGGTAGCACTT	20
hblock__4001__5001	13	-5.9	hblock__4001__5001_F13	59.4	-5.4	AGTTYACCRTATCSTCATGCG	21	hblock__4001__5001_R13	59.4	-6.3	YRTTCTTGTACGTGCTACCSA	21
hblock__4001__5001	14	-5.2	hblock__4001__5001_F14	60.5	-6.8	CCCWCACATYGTYTCSACTG	20	hblock__4001__5001_R14	60.5	-4.7	CTGCTTGTMMTCGGTGTASG	20
hblock__4001__5001	15	-6.8	hblock__4001__5001_F15	60.5	-6.9	TGCGTGGGSACGRATCAAYT	20	hblock__4001__5001_R15	60.5	-6.7	GMWGACARCTCGTTGAAGCC	20
hblock__4001__5001	16	-4.7	hblock__4001__5001_F16	60.4	-3.9	YCATATCCAGCCTCACCTTST	21	hblock__4001__5001_R16	60.4	-6.3	AWATCTCCAGCTCTCCRATGC	21
hblock__4001__5001	17	-5	hblock__4001__5001_F17	59.4	-5	GTGGGAGTTTASCRTWTCYTC	21	hblock__4001__5001_R17	59.4	-6.3	AGASACCAGGCATCAYATAYC	21
hblock__4001__5001	18	-5	hblock__4001__5001_F18	60.5	-6.3	GCARCGTGGTGGGARTTTAC	20	hblock__4001__5001_R18	60.5	-7	GAKWGGCAGAGTCCARGCAT	20
hblock__4001__5001	19	-5.1	hblock__4001__5001_F19	60.5	-6.8	KSAASTACGGCGAGYTGTTC	20	hblock__4001__5001_R19	60.5	-4.6	GMGATGCGGAAGTCCTGRAT	20
hblock__4001__5001	20	-5.1	hblock__4001__5001_F20	60.5	-6.8	STGGTKSGAGTTCACCGTNT	20	hblock__4001__5001_R20	60.5	-6.7	SWYTTGGGMAGCATGGGCWT	20
hblock__4501__5501	1	-4.8	hblock__4501__5501_F1	60.5	-6.3	CAGYCATCCTCAYGTCATCC	20	hblock__4501__5501_R1	60.5	-3.6	ACCTCTCTCARCAYCCTGTC	20
hblock__4501__5501	2	-6.3	hblock__4501__5501_F2	59.4	-5.1	TWGAGCGWCCDTTYCTSATTC	21	hblock__4501__5501_R2	59.4	-5.4	CTGTGGCTCCATRACATCYAA	21
hblock__4501__5501	3	-4.7	hblock__4501__5501_F3	60.5	-6.2	GGCACGAGCCAGACTTCATT	20	hblock__4501__5501_R3	60.5	-3.6	GCTGTCAAACCCAGAACGCT	20
hblock__4501__5501	4	-5	hblock__4501__5501_F4	62.5	-6.8	GGGCAGCTCGACAGACCATT	20	hblock__4501__5501_R4	62.5	-5.4	CGCTTGGCTCCATGAGACTC	20
hblock__4501__5501	5	-5.2	hblock__4501__5501_F5	62.5	-6.8	CCCTCGATGCCGTTCTCCAA	20	hblock__4501__5501_R5	62.5	-4.6	GAGATCACCTCACCGACCTC	20
hblock__4501__5501	6	-6.3	hblock__4501__5501_F6	60.5	-4.6	GASCGWCCRTTCCTSATYCA	20	hblock__4501__5501_R6	60.5	-5	CCTKKGGCTCCATAACATCC	20
hblock__5001__6001	1	-5.2	hblock__5001__6001_F1	60.5	-3.6	CTCGCAMTGAGAGACRCCTT	20	hblock__5001__6001_R1	60.3	-4.6	HGAAGCCAGGRTCAAATATGAG	20
hblock__5001__6001	2	-6.2	hblock__5001__6001_F2	60.4	-6.8	AAATCAGYCGAGTGGTCTCTG	21	hblock__5001__6001_R2	60.4	-3.9	GTTTGGCAGCAATRAGAACCG	21
hblock__5001__6001	3	-4.6	hblock__5001__6001_F3	61.3	-4.6	GGTGATCTCCAAGACTTCTGC	21	hblock__5001__6001_R3	61.3	-6.8	AAGGACGGTCGAGTCAGGTTT	21
hblock__5001__6001	4	-6.2	hblock__5001__6001_F4	59.4	-6.8	ACAGGAAATCAGYCGAGTGG	20	hblock__5001__6001_R4	59.4	-3.9	TRGCAGCAATGAGAACYGTWG	20
hblock__501__1501	1	-6.8	hblock__501__1501_F1	60.3	-3.9	CWKCCTTCTTCAAYATCACWGC	22	hblock__501__1501_R1	60.5	-6.6	CATSGTVACWCCYTGWGTCC	22
hblock__501__1501	2	-6.9	hblock__501__1501_F2	60.5	-4.9	ACWGCSTGCTCBTCMAGTCT	20	hblock__501__1501_R2	60.5	-6.9	WGTWCCRTGWGCYTCSACGT	20
hblock__501__1501	3	-6.2	hblock__501__1501_F3	60.5	-6.8	CGCATCTCSCAYTTYCTCGA	20	hblock__501__1501_R3	60.5	-6.2	TTSASRCTGCCSATCCANAG	20
hblock__501__1501	4	-4.4	hblock__501__1501_F4	60.5	-3.6	GACGCMGCCTTCTTCAACMT	20	hblock__501__1501_R4	60.5	-5	CTGKGTCCAWCCATCCGART	20
hblock__501__1501	5	-6.8	hblock__501__1501_F5	60.5	-6.8	GACGCCTTYYACCACTCSAA	20	hblock__501__1501_R5	60.5	-6.8	CAWCCYTCWCCWCGWCCRTA	20
hblock__501__1501	6	-5.4	hblock__501__1501_F6	60.5	-6.8	WCSTCSATGAGCGAYTAYCG	20	hblock__501__1501_R6	60.5	-6.3	SGTTCCWGTRCCRTGWGCTT	20
hblock__501__1501	7	-6.7	hblock__501__1501_F7	61.5	-4.6	GATCCCCAGCAGCGWYTWCT	20	hblock__501__1501_R7	61.5	-6.8	CTTGRTCSAGWGGCTTSAGG	20
hblock__501__1501	8	-5	hblock__501__1501_F8	60.5	-6.8	GAYCCYTACGTSTWCGATGC	20	hblock__501__1501_R8	60.5	-4.9	ACDCCYTGWGTCCAWCCATC	20
hblock__501__1501	9	-5	hblock__501__1501_F9	60.5	-3.9	GCYGCCTTTGAYGCCAACTT	20	hblock__501__1501_R9	60.5	-6.1	GGGRATKGTGAAGCCCTTTG	20
hblock__501__1501	10	-5.2	hblock__501__1501_F10	60.5	-6.4	CAACCGCAYMTCSTGGTTCT	20	hblock__501__1501_R10	60.5	-6.8	KCCGTGGCAYTCGACAAACT	20
hblock__501__1501	11	-6.5	hblock__501__1501_F11	59.4	-5.2	TCTGCCKAAGAACGATGTCG	20	hblock__501__1501_R11	59.4	-6.8	CWSWCTCGTCGAARCTCTTG	20
hblock__501__1501	12	-6.7	hblock__501__1501_F12	60.5	-6.2	AAGGGMGGGCAYTTCCTSAA	20	hblock__501__1501_R12	60.5	-5.2	GTCCADCCATCYGAGTTSAC	20
hblock__501__1501	13	-6.8	hblock__501__1501_F13	60.5	-6.8	TYGACGCCGCCTTCTTYAAC	20	hblock__501__1501_R13	60.5	-5.4	GGRTTSAGSAWSAGGTTGRC	20
hblock__501__1501	14	-5.2	hblock__501__1501_F14	60.5	-4.7	ASCCARACWGCCTGCTWCMT	20	hblock__501__1501_R14	60.5	-6.8	TTSACRCCWGWGCCWCGRAT	20
hblock__501__1501	15	-6.8	hblock__501__1501_F15	60.5	-6.8	ACWGCBTGCTCDTCSAGTCT	20	hblock__501__1501_R15	60.5	-6.8	CCSAKTGTCTCGTAGATKGC	20
hblock__501__1501	16	-5.4	hblock__501__1501_F16	60.5	-5.4	CARACWGCSTGCTAYATSGG	20	hblock__501__1501_R16	60.3	-6.8	KSGACTCGTASACATRCTTGAT	20
hblock__501__1501	17	-7	hblock__501__1501_F17	60.3	-5.1	CCAACTTCTTCARCATCWSYCA	22	hblock__501__1501_R17	60.5	-5	SGTCTTSCCRTCYTGGTTSA	22
hblock__501__1501	18	-5.1	hblock__501__1501_F18	60.5	-6.8	CTSWTSCGAGAYGCTGARAC	20	hblock__501__1501_R18	61.2	-3.9	CCATCCTGATTTAYWCCWGWSC	20
hblock__501__1501	19	-5	hblock__501__1501_F19	60.5	-3.6	CAGCCTTTTACCACGCCAAC	20	hblock__501__1501_R19	60.5	-3.6	TGWGTCCASCCRTCYGAGTT	20
hblock__501__1501	20	-5.1	hblock__501__1501_F20	60.5	-6.4	CCACRAAAGGWGGKCACTTC	20	hblock__501__1501_R20	60.5	-6.3	GGGGTTGAGGAAVGWCARGT	20
hblock__5501__6501	1	-5.2	hblock__5501__6501_F1	61.5	-5.4	CTTCGCCATCATRCCAAGCC	20	hblock__5501__6501_R1	61.5	-6.8	CAYTGAAGACAGCCSAGTGC	20
hblock__5501__6501	2	-5	hblock__5501__6501_F2	61.5	-6.3	GCWACRCTCCTACAGCTCGT	20	hblock__5501__6501_R2	61.5	-6.5	GACATDGTCGTCGGCTCCAT	20
hblock__5501__6501	3	-6.9	hblock__5501__6501_F3	60.3	-5.4	AYWTGCTCATYCACGATAACCC	22	hblock__5501__6501_R3	60.3	-6.8	ACGGCTCRATGATRACAAASTC	22
hblock__5501__6501	4	-6.4	hblock__5501__6501_F4	58.4	-6.3	GCTGATGTTATWGAGCTGGYT	21	hblock__5501__6501_R4	59.4	-6.8	TTGWYGAAGAGTGAGYGAWCC	21
hblock__5501__6501	5	-2.3	hblock__5501__6501_F5	58.4	-6.3	CACGTACACATCCAAACTCC	20	hblock__5501__6501_R5	58.4	-6.7	CAACAGAAGCACTACYTCTTC	20
hblock__5501__6501	6	-5	hblock__5501__6501_F6	62.5	-5	CAGACCCAGATCCGWTACGC	20	hblock__5501__6501_R6	62.5	-6.3	GAGCCGTTGACGAGCTTCTC	20
hblock__5501__6501	7	-5.2	hblock__5501__6501_F7	60.5	-6.3	RGCTTGTTGGYTTGGTGCTC	20	hblock__5501__6501_R7	60.5	-3.6	GCTCTACAACGACGATGTGC	20
hblock__5501__6501	8	-6.6	hblock__5501__6501_F8	59.4	-5.4	CATGCTCATYCACGACAACC	20	hblock__5501__6501_R8	59.4	-6.8	GACGGCTCGAYGATGACAAA	20
hblock__6001__7001	1	-4.7	hblock__6001__7001_F1	60.4	-4.9	TSGGCTGTCTTCARTGGACAA	21	hblock__6001__7001_R1	60.5	-4.6	ACCTCAAGCGTGCGKATMTG	21
hblock__6001__7001	2	-3.5	hblock__6001__7001_F2	59.4	-6.3	GGAAGCTAGAGGCTATGACTT	21	hblock__6001__7001_R2	59.4	-6.3	RCGWGACARACCATCAATCAC	21
hblock__6001__7001	3	-6.9	hblock__6001__7001_F3	60.3	-6.8	TTGGWTCRCTCACTCTTCRWCA	22	hblock__6001__7001_R3	60.3	-5.4	YAATCTCCATGAACTCGYTGTC	22
hblock__6001__7001	4	-3.5	hblock__6001__7001_F4	58.4	-6.3	GATTTCAGCTCCTACACAGC	20	hblock__6001__7001_R4	58.4	-5.1	GACGCAATGACCTTTGATGC	20
hblock__6001__7001	5	-3.5	hblock__6001__7001_F5	60.3	-5.5	GAGGAGAATCAAGATAGGCTTG	22	hblock__6001__7001_R5	60.3	-3.6	GGAGAATCGGAAGAAAAGGWAG	22
hblock__6001__7001	6	-4.7	hblock__6001__7001_F6	58.4	-5.2	GGGCWAACAAATCTCACYGTT	21	hblock__6001__7001_R6	58.4	-6.3	CAAGGTASAAAGCTGTARACC	21
hblock__6001__7001	7	-5	hblock__6001__7001_F7	61.5	-5	CGTCAKCCATAGCAGACACG	20	hblock__6001__7001_R7	61.5	-5	GCGKTCTCACTACGGACACA	20
hblock__6001__7001	8	-6.2	hblock__6001__7001_F8	60.5	-4.7	GCCTGAGGTBGTCATCATYG	20	hblock__6001__7001_R8	60.5	-6	GAACTCGKCRTCCTTGGWST	20
hblock__6001__7001	9	-5.2	hblock__6001__7001_F9	60.3	-6.8	STTTGTYATCATYGAGCCGTCT	22	hblock__6001__7001_R9	60.5	-4.6	GGWACTCATCGTCSYTKSTG	22
hblock__6001__7001	10	-6.8	hblock__6001__7001_F10	60.5	-5.2	AAGCCYGAGGTSGTCATCRT	20	hblock__6001__7001_R10	60.5	-4.2	GCGGAACTCGTTRTCTWKGG	20
hblock__6001__7001	11	-6.4	hblock__6001__7001_F11	60.5	-6.3	CCAAKCTCACCTCTGTRCTG	20	hblock__6001__7001_R11	60.5	-6.8	RWCCTCSAYGAACTCGSTGT	20
hblock__6001__7001	12	-5.2	hblock__6001__7001_F12	60.3	-6.8	TTTGTCATCATYGAGCCRTCTG	22	hblock__6001__7001_R12	60.5	-4.6	GGWACTCATCGTCSYTKSTG	22
hblock__6501__7501	1	-6.8	hblock__6501__7501_F1	60.5	-6.7	SSARCGWCTBCTCTGGATCA	20	hblock__6501__7501_R1	60.3	-6.8	SCCATGATGTCWCGRAAGTTRA	20
hblock__6501__7501	2	-3.6	hblock__6501__7501_F2	61.5	-3.6	TACGCACGCTTGAGGTGRCT	20	hblock__6501__7501_R2	61.5	-6.8	AGGAAGACGACTCGRTCTCC	20
hblock__6501__7501	3	-5	hblock__6501__7501_F3	60.5	-6.3	CTGCTGGAGRASCTATCYGA	20	hblock__6501__7501_R3	60.5	-5.4	CCCATAGAGCCCATGATGTC	20
hblock__6501__7501	4	-6.2	hblock__6501__7501_F4	60.5	-6.6	GCSTCAAGTTYCARGTCCTG	20	hblock__6501__7501_R4	60.5	-5.4	GACATGGCRTCGGGKATCTT	20
hblock__6501__7501	5	-6.5	hblock__6501__7501_F5	60.5	-6.5	CGAKCCCRWCTWCAACATGG	20	hblock__6501__7501_R5	60.4	-5.4	CATGGASGACATRACATCACG	20
hblock__6501__7501	6	-4.6	hblock__6501__7501_F6	59.4	-5	AAYCCWGATGCCGAGATGGT	20	hblock__6501__7501_R6	59.4	-4.6	GRAGATCCGTGACTTTGCTG	20
hblock__6501__7501	7	-4.9	hblock__6501__7501_F7	60.5	-6.7	GTYGTSWGYTTGCTGGAGCT	20	hblock__6501__7501_R7	60.5	-3.6	GTCACCTTGCTTCCYGTYCT	20
hblock__6501__7501	8	-3.1	hblock__6501__7501_F8	59.4	-5.2	ATGTTGTCCGACAYCGTTGG	20	hblock__6501__7501_R8	59.4	-4.7	CCTTGAAGTTGAGRCTGGCA	20
hblock__6501__7501	9	-3.5	hblock__6501__7501_F9	58.4	-4.2	TCTAGCCTTGTATGGTTTGTTG	22	hblock__6501__7501_R9	58.4	-6.3	TCATCACRTCWCGGAAGTTSA	22
hblock__6501__7501	10	-5	hblock__6501__7501_F10	60.5	-4.6	CCCTCCGAAGYCTVATCTTG	20	hblock__6501__7501_R10	60.5	-5.4	CGCCCATGATGTCCTTGAAG	20
hblock__6501__7501	11	-5.2	hblock__6501__7501_F11	60.5	-6.8	TCTCTCCGAGWYCGWSTWYC	20	hblock__6501__7501_R11	60.5	-6.4	RCCAGGCTTSCCAATSKTGA	20
hblock__6501__7501	12	-6	hblock__6501__7501_F12	60.5	-6.6	GGCAAGACCTWYRTCTCCCT	20	hblock__6501__7501_R12	60.5	-5	CWGGYTTYCCAATCGTGAGC	20
hblock__6501__7501	13	-6.6	hblock__6501__7501_F13	60.5	-4.6	YGAGCGWCTCCTSTGGATHA	20	hblock__6501__7501_R13	60.5	-6.8	RCCWGTWGCCYTGACWTSGA	20
hblock__6501__7501	14	-6.6	hblock__6501__7501_F14	60.5	-6.8	GCACTCGRTTCCARGTTCTG	20	hblock__6501__7501_R14	60.5	-5.4	AAKGACATGGHGTCGGGSAT	20
hblock__6501__7501	15	-5.2	hblock__6501__7501_F15	60.5	-6.3	MSAACGYCTSCTSTGGATCA	20	hblock__6501__7501_R15	60.3	-5.4	SCCATGATGTCWCKGAAGTTRA	20
hblock__6501__7501	16	-4.9	hblock__6501__7501_F16	60.5	-4.7	SAGCGKCTTCTMTGGATCAC	20	hblock__6501__7501_R16	60.5	-5.4	CGGATCTTRGTGGCRTGWGT	20
hblock__6501__7501	17	-5	hblock__6501__7501_F17	59.4	-6.3	TGAGAGCACWCTYTGGGTGA	20	hblock__6501__7501_R17	59.4	-5.4	CRACCATGACATCTCGGAAG	20
hblock__6501__7501	18	-5.7	hblock__6501__7501_F18	60.5	-6.7	TRGAGCTWGAGMAGCCWCTG	20	hblock__6501__7501_R18	60.5	-6.8	RCCWGTWGCCYTGACWTSGA	20
hblock__6501__7501	19	-6.1	hblock__6501__7501_F19	60.5	-4.9	BTGGATCACTTGCGGYGACA	20	hblock__6501__7501_R19	60.5	-5.4	ATCYTGGTGGCRTGWGTWCC	20
hblock__6501__7501	20	-6.1	hblock__6501__7501_F20	60.5	-6.3	GAGMGACTSCTSTGGATYAC	20	hblock__6501__7501_R20	60.5	-5.4	ATCYTGGTGGCATGDGTTCC	20
hblock__7001__8001	1	-6.8	hblock__7001__8001_F1	60.3	-7	NVTCAACTTCCGWGATGTCATG	22	hblock__7001__8001_R1	60.5	-6.8	CTCSACAAASGTGCCRAAVG	22
hblock__7001__8001	2	-6.8	hblock__7001__8001_F2	59.4	-6.8	GGCATCAACTTYMGAGACATC	21	hblock__7001__8001_R2	59.4	-6.8	GTTRAGAACGCARTCAACWCC	21
hblock__7001__8001	3	-6.7	hblock__7001__8001_F3	60.5	-5.5	GVAAGCCTGGWCTBTTGGAC	20	hblock__7001__8001_R3	60.5	-6.8	GASAGNGAGTTSAGVACGCA	20
hblock__7001__8001	4	-5	hblock__7001__8001_F4	59.3	-5.4	STCAACTTCAARGACATCATGG	22	hblock__7001__8001_R4	59.4	-6.8	CRATCTCSACAAANGTGCCAA	22
hblock__7001__8001	5	-6.1	hblock__7001__8001_F5	60.5	-6.3	GGDSTCAACTTCCGWGAYGT	20	hblock__7001__8001_R5	60.5	-6.1	CCMGACARSGAGTTAAGSAC	20
hblock__7001__8001	6	-6.2	hblock__7001__8001_F6	62.5	-5.4	CAGGTCCATGCTGCCAGTCT	20	hblock__7001__8001_R6	62.5	-3.6	AGGCGGGTGTTGTTGACGAC	20
hblock__7001__8001	7	-1.9	hblock__7001__8001_F7	57.4	-3.6	GCACTTGACACTTTGTACTTC	21	hblock__7001__8001_R7	57.4	-4.6	AATATCCTTCTTCCCGATCTC	21
hblock__7001__8001	8	-3.9	hblock__7001__8001_F8	60.5	-4.4	RACRGGAAGCAAGGTGACSA	20	hblock__7001__8001_R8	60.5	-6.8	AGSGAGTTNAGNACGCAGTC	20
hblock__7001__8001	9	-6.8	hblock__7001__8001_F9	60.5	-3.9	CWGGAAGCAAGYGGYATCGT	20	hblock__7001__8001_R9	60.5	-6.8	ARSGAGTTSAGSACGCARTC	20
hblock__7001__8001	10	-5.2	hblock__7001__8001_F10	60.5	-6.8	CCGWGATGTCATGKCRTCSA	20	hblock__7001__8001_R10	60.5	-6.3	CTCHCCAGASAGCGARTTGA	20
hblock__7001__8001	11	-5.2	hblock__7001__8001_F11	60.3	-5.4	NSTCAAYTTCCGWGATGTSATG	22	hblock__7001__8001_R11	60.3	-6.8	ARSGAGTTCARAACGCAATCSA	22
hblock__7001__8001	12	-5.4	hblock__7001__8001_F12	60.3	-5.4	TCAACTTCMRAGATGTCATGGC	22	hblock__7001__8001_R12	60.3	-6.8	CGCATRTCVAGACGCATGTTAT	22
hblock__7001__8001	13	-6.2	hblock__7001__8001_F13	59.4	-6.3	ASGTKGARATTSAGGTSAAGG	21	hblock__7001__8001_R13	59.4	-6.8	CGATCTCGAYAAAGKWGCCAA	21
hblock__7001__8001	14	-6.7	hblock__7001__8001_F14	60.5	-6.3	GSTGAYGACGAGSTWGARCT	20	hblock__7001__8001_R14	60.5	-6.8	SAGSGAGTTGAGVACRCAGT	20
hblock__7001__8001	15	-6.8	hblock__7001__8001_F15	58.4	-5.4	STCAACTTCCGWGATGTBATG	21	hblock__7001__8001_R15	58.4	-6.2	GCCTCWCCTGACAASGAATT	21
hblock__7001__8001	16	-4.6	hblock__7001__8001_F16	58.4	-5.1	TGTCWTTTGAAGARGSAGCAG	21	hblock__7001__8001_R16	58.4	-6.8	GCATGTCSAGACGCATRTTAT	21
hblock__7001__8001	17	-5.5	hblock__7001__8001_F17	60.5	-6.7	CRGGCATBAACTTCCGAGAC	20	hblock__7001__8001_R17	60.5	-6	TTGAGVACGCAGTCHACWCC	20
hblock__7001__8001	18	-5.5	hblock__7001__8001_F18	60.5	-6.2	ATCGGCAARCCTGGWCTSYT	20	hblock__7001__8001_R18	60.5	-6.3	CCCTTGACRAAGCTGSTRTC	20
hblock__7001__8001	19	-7	hblock__7001__8001_F19	59.4	-6.3	TTCCGWGATKTSATGGTWKSC	21	hblock__7001__8001_R19	59.4	-5	KATRTGGTCWTCWGGWATSCC	21
hblock__7001__8001	20	-7	hblock__7001__8001_F20	59.4	-6.8	AWMTCSAAGTCAAGGCTACDG	21	hblock__7001__8001_R20	59.4	-6.8	AGACGCATGTTGTTGGYRATG	21
hblock__7501__8501	1	-6.3	hblock__7501__8501_F1	60.5	-6.3	CTBGTCAASCTCGCWARGCT	20	hblock__7501__8501_R1	60.3	-6.8	WGAASSTGAAMGTSGTRCTCTT	20
hblock__7501__8501	2	-6.5	hblock__7501__8501_F2	60.5	-6.5	CSMCGASCACRTCTTCWACT	20	hblock__7501__8501_R2	60.5	-6.4	AKSACSAGCTTWCCVAGGTG	20
hblock__7501__8501	3	-6.7	hblock__7501__8501_F3	60.5	-6.8	GGSACNTTTGTSGAGATYGG	20	hblock__7501__8501_R3	60.5	-6.6	GASASGAAGGCGATRTTSYG	20
hblock__7501__8501	4	-6.6	hblock__7501__8501_F4	60.5	-6.8	TGCGTBCTSAACTCNCTSTC	20	hblock__7501__8501_R4	60.5	-6.3	CCACCRACAAGRAGGTASGT	20
hblock__7501__8501	5	-5.2	hblock__7501__8501_F5	60.5	-5.4	CASTCKGTSYTGATCCATGC	20	hblock__7501__8501_R5	60.5	-3.6	CACGATGCTTVCCYTGTTGC	20
hblock__7501__8501	6	-5.5	hblock__7501__8501_F6	60.5	-5.4	CASTCKGTSYTGATCCATGC	20	hblock__7501__8501_R6	60.5	-6.8	GATACGGAARGCGTCCTCRA	20
hblock__7501__8501	7	-6.5	hblock__7501__8501_F7	60.5	-6.8	CCCGTCSMACATCTTCYACT	20	hblock__7501__8501_R7	60.4	-6.3	RAASGWSAGSACAATCTTGCC	20
hblock__7501__8501	8	-5.6	hblock__7501__8501_F8	60.5	-5.2	GGTGTHGGWCAAKCAGCSAT	20	hblock__7501__8501_R8	60.3	-5	YGWGGAACRATGACAATCTTGC	20
hblock__7501__8501	9	-6.6	hblock__7501__8501_F9	60.3	-3.6	TTCCMSACGACCACATYTTCAA	22	hblock__7501__8501_R9	60.5	-6.8	GADCGAGASAGGAAGCAHAG	22
hblock__7501__8501	10	-6.9	hblock__7501__8501_F10	60.5	-6.8	GACTGCGTSCTSAACTCNYT	20	hblock__7501__8501_R10	60.5	-4.4	RCCACCSACRATAAGGTASG	20
hblock__7501__8501	11	-5.1	hblock__7501__8501_F11	60.5	-6.6	GACMTYAGCTTCGTCAAGGG	20	hblock__7501__8501_R11	60.3	-4.4	ACATCRCACTGGTACAYCTGAA	20
hblock__7501__8501	12	-3.9	hblock__7501__8501_F12	60.5	-6.6	GCCARTCWGTSCTBATCCAC	20	hblock__7501__8501_R12	60.5	-6.8	RTCCTCRACGGGGTAGTTGA	20
hblock__7501__8501	13	-3.9	hblock__7501__8501_F13	60.5	-5	CSTWCCACKCCYTAGTSAAC	20	hblock__7501__8501_R13	60.5	-4.6	KATCTTGCCSCTGTGYTTGC	20
hblock__7501__8501	14	-5.4	hblock__7501__8501_F14	60.5	-5	GCHTACYACGCWCTCGTCAA	20	hblock__7501__8501_R14	60.5	-6.1	TCMACCTTSCCAACRGGGTA	20
hblock__7501__8501	15	-4.8	hblock__7501__8501_F15	60.5	-3.9	CCCSACGMCCAYATCTTCWA	20	hblock__7501__8501_R15	60.5	-6.7	AAWSYCAGCACGAKCTTSCC	20
hblock__7501__8501	16	-4.9	hblock__7501__8501_F16	60.5	-4.6	CGTGGWGTTGAYTGCGTYCT	20	hblock__7501__8501_R16	60.5	-6.8	GTCGAGCTTSAGYGAKTCCT	20
hblock__7501__8501	17	-6.2	hblock__7501__8501_F17	60.5	-6.3	DCCAGCTTCGTCAAGGGMAT	20	hblock__7501__8501_R17	60.5	-6.2	CCDCCGACMAASAGGTATGT	20
hblock__7501__8501	18	-6.2	hblock__7501__8501_F18	60.5	-4.9	AWRGGCGTKAWGCGGATGAC	20	hblock__7501__8501_R18	60.5	-3.6	GCMAGACTACGACCTAAKCC	20
hblock__7501__8501	19	-6.6	hblock__7501__8501_F19	59.4	-6.2	TBAACTCSTTGTCTGGWGARC	21	hblock__7501__8501_R19	59.4	-6.3	CWGATCGTGAGAKGAARGCWA	21
hblock__7501__8501	20	-6.7	hblock__7501__8501_F20	60.5	-5.1	TSCCHGASGASCACATYTTC	20	hblock__7501__8501_R20	60.5	-4.2	SWCCAAGACCACCKASAMSA	20
hblock__8001__9001	1	-6.8	hblock__8001__9001_F1	60.5	-6.3	GCYAAGRACTCSCTCAAGCT	20	hblock__8001__9001_R1	60.5	-6.3	CRGMWATGGASGAGCAGAWG	20
hblock__8001__9001	2	-5.1	hblock__8001__9001_F2	58.4	-3.9	CAACYTGAACCGTGTCCAAAA	21	hblock__8001__9001_R2	58.4	-3.6	RAAGGAACTCAGCGTGATGAA	21
hblock__8001__9001	3	-5.4	hblock__8001__9001_F3	60.5	-5.4	CTCWTYRTSGGWGGTCTTGG	20	hblock__8001__9001_R3	60.5	-5.4	RCTCTTCATCAGGGCRTGGA	20
hblock__8001__9001	4	-6.2	hblock__8001__9001_F4	60.5	-6.4	GGCAAGCTSGTCCTYWCMWT	20	hblock__8001__9001_R4	60.5	-6.8	CABTCSYCGTGSGTCATSTT	20
hblock__8001__9001	5	-5.4	hblock__8001__9001_F5	60.5	-5.4	GMGGCAAGATYATGGGCAAG	20	hblock__8001__9001_R5	60.5	-5.4	GAKAGGGCRTGGTGGAAGTT	20
hblock__8001__9001	6	-6.8	hblock__8001__9001_F6	60.5	-3.6	GWCACATYGCCTTCCTYTCG	20	hblock__8001__9001_R6	60.5	-6.8	GTCWCGCATRATVCCSAGGT	20
hblock__8001__9001	7	-6.2	hblock__8001__9001_F7	60.5	-6.8	TATCCYGTCRGCGAGATCGA	20	hblock__8001__9001_R7	60.5	-6.3	GYGTCCTGGWAWGTRTTGSC	20
hblock__8001__9001	8	-6.4	hblock__8001__9001_F8	59.4	-3.6	GCCGWASCCATTGACTGTRT	20	hblock__8001__9001_R8	59.4	-6.8	GCTCGTGGTYGAAGTATTGG	20
hblock__8001__9001	9	-7	hblock__8001__9001_F9	60.5	-5.4	ARGATGCCTTCCGYCTSATG	20	hblock__8001__9001_R9	60.5	-6.3	BGAGMTGGASGAGCASAWGA	20
hblock__8001__9001	10	-3.5	hblock__8001__9001_F10	59.4	-4.2	WAGGTGTYTTCGGGYTWCTAG	21	hblock__8001__9001_R10	59.4	-7	GWWYTGGTGGAGRTTCCAWGT	21
hblock__8001__9001	11	-5	hblock__8001__9001_F11	60.5	-6.9	GAGGACGCYTTCCGTMTSAT	20	hblock__8001__9001_R11	60.5	-5.2	AGVACWCCSACATCHCGCAT	20
hblock__8001__9001	12	-5.2	hblock__8001__9001_F12	60.3	-6.8	TWGACCCTGAAKCSACATAYCT	22	hblock__8001__9001_R12	60.3	-5.4	GASGARCAGAWBASCATGAAGT	22
hblock__8001__9001	13	-6.2	hblock__8001__9001_F13	60.5	-6.8	SGGWAAGCATMGDGGWAAGC	20	hblock__8001__9001_R13	60.5	-6.3	GYGTCYTGGWAWGTGTTGSC	20
hblock__8001__9001	14	-3.1	hblock__8001__9001_F14	62.5	-6.8	CGTTTCTCGCCACCATGCGT	20	hblock__8001__9001_R14	62.5	-5.1	TGACCTCAGCCCACTGACTG	20
hblock__8001__9001	15	-5.1	hblock__8001__9001_F15	59.4	-6.3	TWGCYTTCMTCTCACGATCWG	21	hblock__8001__9001_R15	59.4	-6.6	GCATGATDCCYAAGTTSACWG	21
hblock__8001__9001	16	-6	hblock__8001__9001_F16	60.5	-4.6	CTAYCTCMTTGTSGGTGGWC	20	hblock__8001__9001_R16	60.5	-6.3	GCRTCCTGGTATGTGTTDSC	20
hblock__8001__9001	17	-6.7	hblock__8001__9001_F17	60.5	-6.6	CGSAAYATCGCCTTCSTYTC	20	hblock__8001__9001_R17	60.5	-6.8	GTCWCGCATRATVCCSAGGT	20
hblock__8001__9001	18	-6.2	hblock__8001__9001_F18	59.4	-6.3	ATGGTCACSTTSCTYCAGGA	20	hblock__8001__9001_R18	59.4	-3.6	GTCCASTCMTCRTACTTCATC	20
hblock__8001__9001	19	-6.8	hblock__8001__9001_F19	60.4	-6.8	CAAGGATTCGCTCAARCTSGA	21	hblock__8001__9001_R19	60.5	-6.3	GYGTCYTGGWAWGTGTTGSC	21
hblock__8001__9001	20	-5	hblock__8001__9001_F20	61.5	-6.3	CGACGACCACAAGGACRTTG	20	hblock__8001__9001_R20	61.5	-3.6	ACRGACGAGCAGGCGATGAA	20
hblock__8501__9501	1	-7	hblock__8501__9501_F1	60.5	-6.6	GTCAACYTGGGNATCATGCG	20	hblock__8501__9501_R1	60.5	-6.5	ACSAGWGAGTCCACDCCRWA	20
hblock__8501__9501	2	-7	hblock__8501__9501_F2	60.5	-6.6	GCAGSHAACACVTWCCAGGA	20	hblock__8501__9501_R2	60.5	-6.8	RATCCAGTTCCGYACCTCSA	20
hblock__8501__9501	3	-6.6	hblock__8501__9501_F3	59.4	-4.6	SATCWTCTGCTCKTCCWTYWC	21	hblock__8501__9501_R3	59.4	-6.8	WGATCCAGTTYCTBACCTCSA	21
hblock__8501__9501	4	-6.7	hblock__8501__9501_F4	60.5	-7	YTSGGSATCATGCGWGAYGT	20	hblock__8501__9501_R4	60.3	-3.9	AYATCCACTTGACCGTTTCYAC	20
hblock__8501__9501	5	-6.9	hblock__8501__9501_F5	60.5	-6.6	GCAGSHAACACVTWCCAGGA	20	hblock__8501__9501_R5	60.5	-6.8	ACGAGCGARTCWACVCCGTA	20
hblock__8501__9501	6	-3.6	hblock__8501__9501_F6	60.3	-5.4	AYTTCTTCRTCATSCTSTCSTC	22	hblock__8501__9501_R6	60.3	-6.6	TYCAWCTCCCTBGTAATCCAGT	22
hblock__8501__9501	7	-5	hblock__8501__9501_F7	60.5	-6.6	GTTGACCTGGGYATYATGCG	20	hblock__8501__9501_R7	60.5	-5.5	SAGYGAGTCYACACCGTASA	20
hblock__8501__9501	8	-6.1	hblock__8501__9501_F8	60.5	-6.1	CCSAAGRTCCARGGWACATG	20	hblock__8501__9501_R8	60.5	-6.8	RCSAGSGAATCSACWCCRTA	20
hblock__8501__9501	9	-6.7	hblock__8501__9501_F9	59.4	-5.4	SATMWTSTGCTCSTCCATYTC	21	hblock__8501__9501_R9	59.4	-6.3	SGTAATCCAGTTTCKCASYTC	21
hblock__8501__9501	10	-6.8	hblock__8501__9501_F10	60.3	-4.2	SWAACACWTAYCARGACGCWCT	22	hblock__8501__9501_R10	60.5	-4.6	CTCYCTCGTGATCCAGTTBC	22
hblock__8501__9501	11	-3.6	hblock__8501__9501_F11	60.5	-4.7	STCWTCTGCTCSTCCATMKC	20	hblock__8501__9501_R11	60.5	-4.6	CTCCCTMGTGATCCAGTTBC	20
hblock__8501__9501	12	-6	hblock__8501__9501_F12	60.5	-6.6	CAAGGTWCARGGSACMTGGA	20	hblock__8501__9501_R12	60.5	-6.8	GCGTCVTCRAAGWAGWASGG	20
hblock__8501__9501	13	-6.7	hblock__8501__9501_F13	60.5	-6.8	SSTCRATCTVGGCATCATGC	20	hblock__8501__9501_R13	60.5	-6.3	CMTMASCTCAATCGCCACCA	20
hblock__8501__9501	14	-5.4	hblock__8501__9501_F14	60.5	-6.6	GCWGGSAAYACCTWCCARGA	20	hblock__8501__9501_R14	60.3	-6.8	WGAATCRACWCCATARCGGTAC	20
hblock__8501__9501	15	-5.5	hblock__8501__9501_F15	60.3	-5.4	TCWGTSAAYYTGGGWATCATGC	22	hblock__8501__9501_R15	60.5	-6.8	ACAAGCGAGTCHACRCCGTA	22
hblock__8501__9501	16	-3.1	hblock__8501__9501_F16	62.5	-6.8	CGTTTCTCGCCACCATGCGT	20	hblock__8501__9501_R16	62.5	-5.1	TGACCTCAGCCCACTGACTG	20
hblock__8501__9501	17	-3.6	hblock__8501__9501_F17	60.5	-6.1	SCCCAAGGTMCARGGWACAT	20	hblock__8501__9501_R17	60.5	-6.8	TCGASWGCCACAAGMGARTC	20
hblock__8501__9501	18	-5	hblock__8501__9501_F18	60.5	-6.2	GAGGAGGTCMTTGGTATYCG	20	hblock__8501__9501_R18	60.5	-6.4	GAGTCMACSCCGTASWSRTA	20
hblock__8501__9501	19	-5.1	hblock__8501__9501_F19	59.4	-6.8	TGGAAYCTYCACSAGWACTTC	21	hblock__8501__9501_R19	59.4	-6.7	CACMAGASCCTCTGTGATRAT	21
hblock__8501__9501	20	-6	hblock__8501__9501_F20	60.5	-6.2	TTGGAAACMGWGGRCAAGCC	20	hblock__8501__9501_R20	60.5	-4.7	GCWACSAGYGARTCAASWCC	20
hblock__9001__10001	1	-4.4	hblock__9001__10001_F1	62.5	-6.8	AGCACACGGTCTCGATCAGC	20	hblock__9001__10001_R1	62.1	-3.6	CACTCAAACGCCACCAACTTAC	20
hblock__9001__10001	2	-5	hblock__9001__10001_F2	62.5	-5	TGACTGAACGCTCCGTGGTG	20	hblock__9001__10001_R2	62.1	-5.4	AGACATGGACGCAATCTTCTCG	20
hblock__9001__10001	3	-5.5	hblock__9001__10001_F3	59.4	-5	GAAKCCTGCSTAYTTTGACGA	21	hblock__9001__10001_R3	59.3	-3.9	GAAAGACAWTCCCTCAAGAARC	21
hblock__9001__10001	4	-3.5	hblock__9001__10001_F4	58.4	-3.6	CTGACAGTAAGGACACTCTATT	22	hblock__9001__10001_R4	58.4	-3.6	CGACRAATCTCACACCAAGTT	22
hblock__9001__10001	5	-3.5	hblock__9001__10001_F5	57.4	-4.2	TGACATCCTTGCTAGTAATGG	21	hblock__9001__10001_R5	57.4	-6.8	TCGAGAAGTTTGCTCTTCTTG	21
hblock__9001__10001	6	-4.9	hblock__9001__10001_F6	58.4	-3.9	GAGTTTCCTGCCCAAATCTG	20	hblock__9001__10001_R6	58.4	-3.9	AGATACCGTAACCAACTTGCTA	20
hblock__9001__10001	7	-6.8	hblock__9001__10001_F7	60.5	-5.4	GWCTSGGCACWGGCGAWATT	20	hblock__9001__10001_R7	60.5	-5.1	TCTGCTCCGCAAATGTCTCC	20

## Sheet: SM3 - Screened isolates
isolate_full_name	isolate_short_name	organism	external_accession	source	country	year	ITS_accesion	TEF_accesion
Acephala sp. MB_CD_1F_2	MB_CD_1F_2	Acephala sp.		PUT, 2019	Poland	2019	OR600310	PP407594
Acremonium persicinum Env1	Env1	Acremonium persicinum		MK,2019	Poland	2019	OR600292	PP407583
Acremonium sclerotigenum E154	E154	Acremonium sclerotigenum		LB, 2019	Poland	2019	MZ447534	-
Acremonium sclerotigenum E69	E69	Acremonium sclerotigenum		LB, 2019	Poland	2019	MZ447464	-
Acremonium sclerotigenum E82	E82	Acremonium sclerotigenum		LB, 2019	Poland	2019	MZ447473	-
Alternaria daucicaulis DWA_3CD_2_2	DWA_3CD_2_2	Alternaria daucicaulis		PUT, 2020	Poland	2020	OR600342	PP407604
Alternaria sp. DWA_W3_2_1	DWA_W3_2_1	Alternaria sp.		PUT, 2020	Poland	2020	OR600345	PP407607
Bipolaris victoriae Pch4	Pch4	Bipolaris victoriae		JChe, 2019	Poland	2019	OR600318	-
Cadophora luteo-olivacea CZ_1_50_3	CZ_1_50_3	Cadophora luteo-olivacea		PUT, 2019	Poland	2019	OR600326	-
Chaetomium atrobrunneum W_F1_0.1_2	W_F1_0.1_2	Chaetomium atrobrunneum		PUT, 2019	Poland	2019	OR600323	-
Cladorrhinum australe EW2	EW2	Cladorrhinum australe		LB, 2019	Poland	2019	MT276038.1	-
Cladorrhinum australe EW4	EW4	Cladorrhinum australe		LB, 2019	Poland	2019	MT276040.1	-
Cladosporium cladosporides E99	E99	Cladosporium cladosporides		LB, 2019	Poland	2019	MW888896	-
Cladosporium cladosporioides 2_50_CZ	2_50_CZ	Cladosporium cladosporioides	-	PUT, 2019	Poland	2019	OR600331	-
Cladosporium tenuissimum 2_25_W_1	2_25_W_1	Cladosporium tenuissimum	-	PUT, 2019	Poland	2019	OR600329	-
Coniella fragiare CBS 172.49	CBS 172.49	Coniella fragiare	CBS 172.49	CBS-KNAW	Belgium	1949	OR600304	-
Coniochaeta sp. Env2	Env2	Coniochaeta sp.		MK,2019	Poland	2019	OR600293	PP407584
Coniochaeta velutina Env5	Env5	Coniochaeta velutina		MK, 2020	Poland	2020	OR600349	PP407611
Cosmospora viliuscula Env6	Env6	Cosmospora viliuscula		MK, 2020	Poland	2020	OR600350	PP407612
Curvularia affinis CBS 154.34	CBS 154.34	Curvularia affinis	CBS 154.34	CBS-KNAW	Indonesia	1934	OR600302	-
Curvularia inequalis SPO1	SPO1	Curvularia inequalis		SP, 2017	UK	2013	OR600286	PP407577
Dendryphion europaeum MB_CD_5F_2	MB_CD_5F_2	Dendryphion europaeum		PUT, 2019	Poland	2019	OR600313	-
Diaporthe toxica MJ01	MJ01	Diaporthe toxica		MJ, 2017	Poland	2017	OR600285	PP407576
Diaporthella corylina CBS 121124	CBS 121124	Diaporthella corylina	CBS 121124	CBS-KNAW	China	2004	OR600301	PP407591
Didymella anserina ASP_W2_5_1	ASP_W2_5_1	Didymella anserina	-	PUT, 2020	Poland	2020	OR600334	PP407596
Drechslera gramminea Pch5	Pch5	Drechslera gramminea		JChe, 2019	Poland	2019	OR600319	-
Elaphocordyceps sp. ASP_W2_5_2	ASP_W2_5_2	Elaphocordyceps sp.	-	PUT, 2020	Poland	2020	OR600335	PP407597
Engyodontium sp. BUD11_2	BUD11_2	Engyodontium sp.	-	PUT, 2019	Poland	2019	OR600321	-
Epicoccum nigrum MB_CD_2F_1	MB_CD_2F_1	Epicoccum nigrum		PUT, 2019	Poland	2019	OR600311	-
Epicoccum nigrum Pch3	Pch3	Epicoccum nigrum		JChe, 2019	Poland	2019	OR600317	-
Exserohilum pedicellatum CBS 322.64	CBS 322.64	Exserohilum pedicellatum	CBS 322.64	CBS-KNAW	USA	1964	OR600305	-
Fusarium ceralis 835_FG	835_FG	Fusarium ceralis	-	LS, 2016	Poland	2016	OR600287	PP407578
Fusarium cerealis Pch16	Pch16	Fusarium cerealis		JChe, 2019	Poland	2019	OR600320	-
Fusarium equiseti On2.3	On2.3	Fusarium equiseti		LS, 2016	Poland	2016	OR600283	PP407574
Fusarium equiseti On2.6	On2.6	Fusarium equiseti		LS, 2016	Poland	2016	OR600284	PP407575
Fusarium solani Env3	Env3	Fusarium solani		MK, 2020	Poland	2020	OR600332	-
Geomyces pannorum E114	E114	Geomyces pannorum		LB, 2019	Poland	2019	MZ447498	-
Ilyonectria leucospermi CBS 132810	CBS 132810	Ilyonectria leucospermi	CBS 132810	CBS-KNAW	South Africa	2012	OR600299	PP407589
Ilyonectria robusta CBS 605.92	CBS 605.92	Ilyonectria robusta	CBS 605.92	CBS-KNAW	Germany	1992	OR600296	PP407586
Leptospora sp. DWA_W3_4_2	DWA_W3_4_2	Leptospora sp.		PUT, 2020	Poland	2020	OR600346	PP407608
Leucostoma cinctum CBS 268.82	CBS 268.82	Leucostoma cinctum	CBS 268.82	CBS-KNAW	Germany	1982	OR600308	-
Melanopsamma pomiformis CBS 101322	CBS 101322	Melanopsamma pomiformis	CBS 101322	CBS-KNAW	Czech Republic	1998	OR600297	PP407587
Paraphaeosphaeria michotii MAS_W_3_1	MAS_W_3_1	Paraphaeosphaeria michotii		PUT, 2020	Poland	2020	OR600348	PP407610
Parastagonospora avenae CZ_1_25_3	CZ_1_25_3	Parastagonospora avenae		PUT, 2019	Poland	2019	OR600325	-
Penicilium sanguifluum 2_50_W_III	2_50_W_III	Penicilium sanguifluum	-	PUT, 2019	Poland	2019	OR600330	-
Penicillium adametzii 1_25_W_4	1_25_W_4	Penicillium adametzii	-	PUT, 2019	Poland	2019	OR600327	-
Penicillium bialowiezense MB_W_7F	MB_W_7F	Penicillium bialowiezense		PUT, 2019	Poland	2019	OR600309	-
Penicillium biourgeianum AZS1_W_A5_5	AZS1_W_A5_5	Penicillium biourgeianum	-	PUT, 2020	Poland	2020	OR600341	PP407603
Penicillium brasilianum 1_25_W_3	1_25_W_3	Penicillium brasilianum	-	PUT, 2019	Poland	2019	OR600328	-
Penicillium chrysogenum AZS1_CD_A5_3	AZS1_CD_A5_3	Penicillium chrysogenum	-	PUT, 2020	Poland	2020	OR600337	PP407599
Penicillium expansum Pch1	Pch1	Penicillium expansum		JChe, 2019	Poland	2019	OR600315	-
Penicillium olsoni E63	E63	Penicillium olsoni		LB, 2019	Poland	2019	MZ447460	-
Penicillium olsoni E68	E68	Penicillium olsoni		LB, 2019	Poland	2019	MZ447463	-
Penicillium olsoni E77	E77	Penicillium olsoni		LB, 2019	Poland	2019	MZ447468	-
Penicillium sp. AZS1_W_A4_2	AZS1_W_A4_2	Penicillium sp.	-	PUT, 2020	Poland	2020	OR600340	PP407602
Penicillium sp. DWA_W3_5_2	DWA_W3_5_2	Penicillium sp.		PUT, 2020	Poland	2020	OR600347	PP407609
Petriella sordida BUD1_3	BUD1_3	Petriella sordida	-	PUT, 2019	Poland	2019	OR600322	-
Phialophora lagerbergii CBS 353.76	CBS 353.76	Phialophora lagerbergii	CBS 353.76	CBS-KNAW	Finland	1976	OR600306	PP407593
Phlebia sp. E62	E62	Phlebia sp.		LB, 2019	Poland	2019	MZ447459	-
Phoma sp. EW107	EW107	Phoma sp.		LB, 2019	Poland	2019	MT276117.1	-
Pithomyces chartarum ASP_CD2_3_1	ASP_CD2_3_1	Pithomyces chartarum	-	PUT, 2020	Poland	2020	OR600333	PP407595
Pithomyces chartarum AZS1_W_A1_1	AZS1_W_A1_1	Pithomyces chartarum	-	PUT, 2020	Poland	2020	OR600338	-
Pochonia bulbilosa CYS17	CYS17	Pochonia bulbilosa		LS, 2016	Poland	2016	OR600289	PP407580
Pochonia chlamydosphoria var. catenulata CBS 749.83	CBS 749.83	Pochonia chlamydosphoria var. catenulata	CBS 749.83	CBS-KNAW	Slovakia	1983	OR600294	PP407585
Pochonia globispora CBS 203.86	CBS 203.86	Pochonia globispora	CBS 203.86	CBS-KNAW	Netherlands	1986	OR600295	-
Pochonia sp. J3.5	J3.5	Pochonia sp.		LS, 2016	Poland	2016	OR600288	PP407579
Pochonia suchlasporia var. catenata CBS 102259	CBS 102259	Pochonia suchlasporia var. catenata	CBS 102259	CBS-KNAW	Germany	1999	OR600298	PP407588
Pyrenophora leucospermi CBS 115178	CBS 115178	Pyrenophora leucospermi	CBS 115178	CBS-KNAW	Spain	2000	-	PP407590
Ramularia eucalypti SAS_CD_2_1	SAS_CD_2_1	Ramularia eucalypti		PUT, 2020	Poland	2020	OR600351	PP407613
Rotiferophthora angustisporia CBS 101437	CBS 101437	Rotiferophthora angustisporia	CBS 101437	CBS-KNAW	unknown	1998	OR600291	PP407582
Sarocladium bacillisporum DWA_3CD_5_3	DWA_3CD_5_3	Sarocladium bacillisporum		PUT, 2020	Poland	2020	OR600344	PP407606
Sarocladium spinificis E142	E142	Sarocladium spinificis		LB, 2019	Poland	2019	MZ447524	-
Sarocladium spinificis E194	E194	Sarocladium spinificis		LB, 2019	Poland	2019	MW888900	-
Sarocladium spinificis E49	E49	Sarocladium spinificis		LB, 2019	Poland	2019	MZ447450	-
Sarocladium spinificis E65	E65	Sarocladium spinificis		LB, 2019	Poland	2019	MZ447461	-
Sarocladium spinificis E79	E79	Sarocladium spinificis		LB, 2019	Poland	2019	MZ447470	-
Sarocladium strictum AZS1_CD_A5_1	AZS1_CD_A5_1	Sarocladium strictum	-	PUT, 2020	Poland	2020	OR600336	PP407598
Sarocladium strictum E21	E21	Sarocladium strictum		LB, 2019	Poland	2019	MZ447431	-
Sarocladium strictum E22	E22	Sarocladium strictum		LB, 2019	Poland	2019	MZ447432	-
Sarocladium strictum E23	E23	Sarocladium strictum		LB, 2019	Poland	2019	MZ447433	-
Sarocladium strictum E24	E24	Sarocladium strictum		LB, 2019	Poland	2019	MZ447434	-
Sarocladium strictum SAS_W_2_1	SAS_W_2_1	Sarocladium strictum		PUT, 2020	Poland	2020	OR600352	PP407614
Sarocladium strictum SAS_W_2_2	SAS_W_2_2	Sarocladium strictum		PUT, 2020	Poland	2020	OR600353	PP407615
Scopulariopsis brevicaulis MB_CD_3F_1	MB_CD_3F_1	Scopulariopsis brevicaulis		PUT, 2019	Poland	2019	OR600312	-
Setophoma terestris EW84	EW84	Setophoma terestris		LB, 2019	Poland	2019	MT276099.1	-
Setophoma terestris EW90	EW90	Setophoma terestris		LB, 2019	Poland	2019	MT276104.1	-
Stachybotrys albipes CBS 136177	CBS 136177	Stachybotrys albipes	CBS 136177	CBS-KNAW	Belgium	2006	OR600307	-
Stachybotrys chlorohalonata CZ_F1_0.1_2	CZ_F1_0.1_2	Stachybotrys chlorohalonata		PUT, 2019	Poland	2019	OR600324	-
Stemphylium vesicarium AZS1_W_A3_4	AZS1_W_A3_4	Stemphylium vesicarium	-	PUT, 2020	Poland	2020	OR600339	PP407601
Stemphylium vesicarium E280	E280	Stemphylium vesicarium		LB, 2019	Poland	2019	MW775904	-
Talaromyces acaricola MB_CD_6F_2	MB_CD_6F_2	Talaromyces acaricola		PUT, 2019	Poland	2019	OR600314	-
Talaromyces sp. DWA_3CD_5_1	DWA_3CD_5_1	Talaromyces sp.		PUT, 2020	Poland	2020	OR600343	PP407605
Thozetella tocklaiensis CBS 378.58	CBS 378.58	Thozetella tocklaiensis	CBS 378.58	CBS-KNAW	India	1958	OR600303	-
Trichothecium roseum Pch2	Pch2	Trichothecium roseum		JChe, 2019	Poland	2019	OR600316	-
Valsa ceratophora CBS 586.84	CBS 586.84	Valsa ceratophora	CBS 586.84	CBS-KNAW	Italy	1984	OR600300	-
Zopfia rhizophila CBS 207.26	CBS 207.26	Zopfia rhizophila	CBS 207.26	CBS-KNAW	United Kingdom	1926	OR600290	PP407581
Zopfiella sp. EW20	EW20	Zopfiella sp.		LB, 2019	Poland	2019	MT276052.1	-

## Sheet: SM4 - Model genomes analysed
taxon	phylum	klass	order	family	source	source_identifier	date_archived	art_title_line	pmid	amplicon_prefix	alt_amplicon_prefix	status
Aaosphaeria arxii CBS 175.79	Ascomycota	Dothideomycetes	Pleosporales		JGI/Mycocosm	Aaoar1	20/04/2021	Haridas, S.; Albert, R.; Binder, M.; Bloem, J.; LaButti, K.; Salamov, A.; Andreopoulos, B.; Baker, S.E.; Barry, K.; Bills, G.; Bluhm, B.H.; Cannon, C.; Castanera, R.; Culley, D.E.; Daum, C.; Ezra, D.; González, J.B.; Henrissat, B.; Kuo, A.; Liang, C.; Lipzen, A.; Lutzoni, F.; Magnuson, J.; Mondo, S.J.; Nolan, M.; Ohm, R.A.; Pangilinan, J.; Park, H.J.; Ramírez, L.; Alfaro, M.; Sun, H.; Tritt, A.; …	32206138	Aaosphaeria_arxii_CBS_175.79	aaosphaeria_arxii_cbs_175.79	negative
Abortiporus biennis	Basidiomycota	Agaricomycetes	Polyporales	Podoscyphaceae	JGI/Mycocosm	None	20/04/2021	Hage, H.; Miyauchi, S.; Virágh, M.; Drula, E.; Min, B.; Chaduli, D.; Navarro, D.; Favel, A.; Norest, M.; Lesage-Meessen, L.; Bálint, B.; Merényi, Z.; de Eugenio, L.; Morin, E.; Martínez, A.T.; Baldrian, P.; Štursová, M.; Martínez, M.J.; Novotny, C.; Magnuson, J.K.; Spatafora, J.W.; Maurice, S.; Pangilinan, J.; Andreopoulos, W.; LaButti, K.; Hundley, H.; Na, H.; Kuo, A.; Barry, K.; Lipzen, A.; Hen…	33538380	Abortiporus_biennis	abortiporus_biennis_cirm-brfm1778	negative
Absidia repens	Mucoromycota	Mucoromycetes	Mucorales	Cunninghamellaceae	Ensembl/Fungi	GCA_002105175.1	02/07/2019	Mondo, S.J.; Dannebaum, R.O.; Kuo, R.C.; Louie, K.B.; Bewick, A.J.; LaButti, K.; Haridas, S.; Kuo, A.; Salamov, A.; Ahrendt, S.R.; Lau, R.; Bowen, B.P.; Lipzen, A.; Sullivan, W.; Andreopoulos, B.B.; Clum, A.; Lindquist, E.; Daum, C.; Northen, T.R.; Kunde-Ramamoorthy, G.; Schmitz, R.J.; Gryganskyi, A.; Culley, D.; Magnuson, J.; James, T.Y.; O'Malley, M.A.; Stajich, J.E.; Spatafora, J.W.; Visel, A.…	28481340	Absidia_repens	absidia_repens_gca_002105175	negative
Acaromyces ingoldii	Basidiomycota	Exobasidiomycetes	Exobasidiales	Cryptobasidiaceae	Ensembl/Fungi	GCA_003144295.1	02/07/2019	Kijpornyongpan, T.; Mondo, S.J.; Barry, K.; Sandor, L.; Lee, J.; Lipzen, A.; Pangilinan, J.; LaButti, K.; Hainaut, M.; Henrissat, B.; Grigoriev, I.V.; Spatafora, J.W.; Aime, M.C. Broad Genomic Sampling Reveals a Smut Pathogenic Ancestry of the Fungal Clade Ustilaginomycotina. 2018, Mol Biol Evol 35(8):1840-1854	29771364	Acaromyces_ingoldii	acaromyces_ingoldii_gca_003144295	negative
Acarospora strigata	Ascomycota	Lecanoromycetes	Acarosporales	Acarosporaceae	JGI/Mycocosm	Acastr1	20/04/2021	McDonald, T.R.; Mueller, O.; Dietrich, F.S.; Lutzoni, F. High-throughput genome sequencing of lichenizing fungi to assess gene loss in the ammonium transporter/ammonia permease gene family. 2013, BMC Genomics 14(None):225	23557360	Acarospora_strigata	acarospora_strigata_cbs_132363	negative
Acephala macrosclerotiorum	Ascomycota	Leotiomycetes	Helotiales	Mollisiaceae	JGI/Mycocosm	Acema1	20/04/2021	Miyauchi, S.; Kiss, E.; Kuo, A.; Drula, E.; Kohler, A.; Sánchez-García, M.; Morin, E.; Andreopoulos, B.; Barry, K.W.; Bonito, G.; Buée, M.; Carver, A.; Chen, C.; Cichocki, N.; Clum, A.; Culley, D.; Crous, P.W.; Fauchery, L.; Girlanda, M.; Hayes, R.D.; Kéri, Z.; LaButti, K.; Lipzen, A.; Lombard, V.; Magnuson, J.; Maillard, F.; Murat, C.; Nolan, M.; Ohm, R.A.; Pangilinan, J.; Pereira, M.F.; Perotto…	33046698	Acephala_macrosclerotiorum	acephala_macrosclerotiorum_ew76-utf0540	positive
Acidomyces richmondensis	Ascomycota	Dothideomycetes	Capnodiales		Ensembl/Fungi	GCA_001572075.1	02/07/2019	Mosier, A.C.; Miller, C.S.; Frischkorn, K.R.; Ohm, R.A.; Li, Z.; LaButti, K.; Lapidus, A.; Lipzen, A.; Chen, C.; Johnson, J.; Lindquist, E.A.; Pan, C.; Hettich, R.L.; Grigoriev, I.V.; Singer, S.W.; Banfield, J.F. Fungi Contribute Critical but Spatially Varying Roles in Nitrogen and Carbon Cycling in Acid Mine Drainage. 2016, Front Microbiol 7(None):238	26973616	Acidomyces_richmondensis	acidomyces_richmondensis_gca_001572075	negative
Acremonium chrysogenum ATCC 11550	Ascomycota	Sordariomycetes	Hypocreales		Ensembl/Fungi	GCA_000769265.1	02/07/2019	Terfehr, D.; Dahlmann, T.A.; Specht, T.; Zadra, I.; Kürnsteiner, H.; Kück, U. Genome Sequence and Annotation of Acremonium chrysogenum, Producer of the β-Lactam Antibiotic Cephalosporin C. 2014, Genome Announc 2(5):None	25291769	Acremonium_chrysogenum_ATCC_11550	acremonium_chrysogenum_atcc_11550_gca_000769265	negative
Agaricus bisporus var. burnettii JB137-S8	Basidiomycota	Agaricomycetes	Agaricales	Agaricaceae	Ensembl/Fungi	GCA_000300555.1	02/07/2019	Morin, E.; Kohler, A.; Baker, A.R.; Foulongne-Oriol, M.; Lombard, V.; Nagy, L.G.; Ohm, R.A.; Patyshakuliyeva, A.; Brun, A.; Aerts, A.L.; Bailey, A.M.; Billette, C.; Coutinho, P.M.; Deakin, G.; Doddapaneni, H.; Floudas, D.; Grimwood, J.; Hildén, K.; Kües, U.; Labutti, K.M.; Lapidus, A.; Lindquist, E.A.; Lucas, S.M.; Murat, C.; Riley, R.W.; Salamov, A.A.; Schmutz, J.; Subramanian, V.; Wösten, H.A.;…	23045686	Agaricus_bisporus_var._burnettii_JB137-S8	agaricus_bisporus_var_burnettii_jb137_s8_gca_000300555	negative
Agrocybe pediades	Basidiomycota	Agaricomycetes	Agaricales	Bolbitiaceae	JGI/Mycocosm	Agrped1	20/04/2021	Ruiz-Dueñas, F.J.; Barrasa, J.M.; Sánchez-García, M.; Camarero, S.; Miyauchi, S.; Serrano, A.; Linde, D.; Babiker, R.; Drula, E.; Ayuso-Fernández, I.; Pacheco, R.; Padilla, G.; Ferreira, P.; Barriuso, J.; Kellner, H.; Castanera, R.; Alfaro, M.; Ramírez, L.; Pisabarro, A.G.; Riley, R.; Kuo, A.; Andreopoulos, W.; LaButti, K.; Pangilinan, J.; Tritt, A.; Lipzen, A.; He, G.; Yan, M.; Ng, V.; Grigoriev…	33211093	Agrocybe_pediades	agrocybe_pediades_ah_40210	negative
Alternaria alternata	Ascomycota	Dothideomycetes	Pleosporales	Pleosporaceae	Ensembl/Fungi	GCA_001642055.1	02/07/2019	Zeiner, C.A.; Purvine, S.O.; Zink, E.M.; Paša-Tolić, L.; Chaput, D.L.; Haridas, S.; Wu, S.; LaButti, K.; Grigoriev, I.V.; Henrissat, B.; Santelli, C.M.; Hansel, C.M. Comparative Analysis of Secretome Profiles of Manganese(II)-Oxidizing Ascomycete Fungi. 2016, PLoS One 11(7):e0157844	27434633	Alternaria_alternata	alternaria_alternata_gca_001642055	negative
Alternaria arborescens	Ascomycota	Dothideomycetes	Pleosporales	Pleosporaceae	NCBI/RefSeq	GCF_004154835.1	01/07/2019	Armitage, A.D.; Cockerton, H.M.; Sreenivasaprasad, S.; Woodhall, J.; Lane, C.R.; Harrison, R.J.; Clarkson, J.P. Genomics Evolutionary History and Diagnostics of the <i>Alternaria alternata</i> Species Group Including Apple and Asian Pear Pathotypes. 2019, Front Microbiol 10(None):3124	32038562	Alternaria_arborescens	Alternaria_arborescens	negative
Alternaria gaisen	Ascomycota	Dothideomycetes	Pleosporales	Pleosporaceae	NCBI/GenBank	GCA_004156025.1	01/07/2019	Armitage, A.D.; Cockerton, H.M.; Sreenivasaprasad, S.; Woodhall, J.; Lane, C.R.; Harrison, R.J.; Clarkson, J.P. Genomics Evolutionary History and Diagnostics of the <i>Alternaria alternata</i> Species Group Including Apple and Asian Pear Pathotypes. 2019, Front Microbiol 10(None):3124	32038562	Alternaria_gaisen	Alternaria_gaisen	negative
Alternaria sp. MG1	Ascomycota	Dothideomycetes	Pleosporales	Pleosporaceae	NCBI/GenBank	GCA_003574525.1	01/07/2019	Lu, Y.; Ye, C.; Che, J.; Xu, X.; Shao, D.; Jiang, C.; Liu, Y.; Shi, J. Genomic sequencing, genome-scale metabolic network reconstruction, and in silico flux analysis of the grape endophytic fungus Alternaria sp. MG1. 2019, Microb Cell Fact 18(1):13	30678677	Alternaria_sp._MG1	Alternaria_sp._MG1	negative
Alternaria tenuissima	Ascomycota	Dothideomycetes	Pleosporales	Pleosporaceae	NCBI/GenBank	GCA_004156035.1	01/07/2019	Armitage, A.D.; Cockerton, H.M.; Sreenivasaprasad, S.; Woodhall, J.; Lane, C.R.; Harrison, R.J.; Clarkson, J.P. Genomics Evolutionary History and Diagnostics of the <i>Alternaria alternata</i> Species Group Including Apple and Asian Pear Pathotypes. 2019, Front Microbiol 10(None):3124	32038562	Alternaria_tenuissima	Alternaria_tenuissima	negative
Amanita muscaria Koide BX008	Basidiomycota	Agaricomycetes	Agaricales	Amanitaceae	Ensembl/Fungi	GCA_000827485.1	02/07/2019	Kohler, A.; Kuo, A.; Nagy, L.G.; Morin, E.; Barry, K.W.; Buscot, F.; Canbäck, B.; Choi, C.; Cichocki, N.; Clum, A.; Colpaert, J.; Copeland, A.; Costa, M.D.; Doré, J.; Floudas, D.; Gay, G.; Girlanda, M.; Henrissat, B.; Herrmann, S.; Hess, J.; Högberg, N.; Johansson, T.; Khouja, H.R.; LaButti, K.; Lahrmann, U.; Levasseur, A.; Lindquist, E.A.; Lipzen, A.; Marmeisse, R.; Martino, E.; Murat, C.; Ngan,…	25706625	Amanita_muscaria_Koide_BX008	amanita_muscaria_koide_bx008_gca_000827485	negative
Amanita rubescens	Basidiomycota	Agaricomycetes	Agaricales	Amanitaceae	JGI/Mycocosm	Amarub1	20/04/2021	Miyauchi, S.; Kiss, E.; Kuo, A.; Drula, E.; Kohler, A.; Sánchez-García, M.; Morin, E.; Andreopoulos, B.; Barry, K.W.; Bonito, G.; Buée, M.; Carver, A.; Chen, C.; Cichocki, N.; Clum, A.; Culley, D.; Crous, P.W.; Fauchery, L.; Girlanda, M.; Hayes, R.D.; Kéri, Z.; LaButti, K.; Lipzen, A.; Lombard, V.; Magnuson, J.; Maillard, F.; Murat, C.; Nolan, M.; Ohm, R.A.; Pangilinan, J.; Pereira, M.F.; Perotto…	33046698	Amanita_rubescens	amanita_rubescens_p_ilba	negative
Amanita thiersii Skay4041	Basidiomycota	Agaricomycetes	Agaricales	Amanitaceae	Ensembl/Fungi	GCA_002554575.1	02/07/2019	Hess, J.; Skrede, I.; Wolfe, B.E.; LaButti, K.; Ohm, R.A.; Grigoriev, I.V.; Pringle, A. Transposable element dynamics among asymbiotic and ectomycorrhizal Amanita fungi. 2014, Genome Biol Evol 6(7):1564-78	24923322	Amanita_thiersii_Skay4041	amanita_thiersii_skay4041_gca_002554575	negative
Ambrosiozyma philentoma	Ascomycota	Saccharomycetes	Saccharomycetales		JGI/Mycocosm	Ambph1	01/06/2019	Krassowski, T.; Coughlan, A.Y.; Shen, X.X.; Zhou, X.; Kominek, J.; Opulente, D.A.; Riley, R.; Grigoriev, I.V.; Maheshwari, N.; Shields, D.C.; Kurtzman, C.P.; Hittinger, C.T.; Rokas, A.; Wolfe, K.H. Evolutionary instability of CUG-Leu in the genetic code of budding yeasts. 2018, Nat Commun 9(1):1887	29760453	Ambrosiozyma_philentoma	ambrosiozyma_philentoma_nrrl_y-7523	negative
Amniculicola lignicola CBS 123094	Ascomycota	Dothideomycetes	Pleosporales	Amniculicolaceae	JGI/Mycocosm	Amnli1	20/04/2021	Haridas, S.; Albert, R.; Binder, M.; Bloem, J.; LaButti, K.; Salamov, A.; Andreopoulos, B.; Baker, S.E.; Barry, K.; Bills, G.; Bluhm, B.H.; Cannon, C.; Castanera, R.; Culley, D.E.; Daum, C.; Ezra, D.; González, J.B.; Henrissat, B.; Kuo, A.; Liang, C.; Lipzen, A.; Lutzoni, F.; Magnuson, J.; Mondo, S.J.; Nolan, M.; Ohm, R.A.; Pangilinan, J.; Park, H.J.; Ramírez, L.; Alfaro, M.; Sun, H.; Tritt, A.; …	32206138	Amniculicola_lignicola_CBS_123094	amniculicola_lignicola_cbs_123094	negative
Amorphotheca resinae ATCC 22711	Ascomycota	Leotiomycetes		Myxotrichaceae	Ensembl/Fungi	GCA_003019875.1	02/07/2019	Martino, E.; Morin, E.; Grelet, G.A.; Kuo, A.; Kohler, A.; Daghino, S.; Barry, K.W.; Cichocki, N.; Clum, A.; Dockter, R.B.; Hainaut, M.; Kuo, R.C.; LaButti, K.; Lindahl, B.D.; Lindquist, E.A.; Lipzen, A.; Khouja, H.R.; Magnuson, J.; Murat, C.; Ohm, R.A.; Singer, S.W.; Spatafora, J.W.; Wang, M.; Veneault-Fourrey, C.; Henrissat, B.; Grigoriev, I.V.; Martin, F.M.; Perotto, S. Comparative genomics an…	29315638	Amorphotheca_resinae_ATCC_22711	amorphotheca_resinae_atcc_22711_gca_003019875	negative
Ampelomyces quisqualis	Ascomycota	Dothideomycetes	Pleosporales	Leptosphaeriaceae	JGI/Mycocosm	Ampqui1	20/04/2021	Haridas, S.; Albert, R.; Binder, M.; Bloem, J.; LaButti, K.; Salamov, A.; Andreopoulos, B.; Baker, S.E.; Barry, K.; Bills, G.; Bluhm, B.H.; Cannon, C.; Castanera, R.; Culley, D.E.; Daum, C.; Ezra, D.; González, J.B.; Henrissat, B.; Kuo, A.; Liang, C.; Lipzen, A.; Lutzoni, F.; Magnuson, J.; Mondo, S.J.; Nolan, M.; Ohm, R.A.; Pangilinan, J.; Park, H.J.; Ramírez, L.; Alfaro, M.; Sun, H.; Tritt, A.; …	32206138	Ampelomyces_quisqualis	ampelomyces_quisqualis_hmlac05119	negative
Amylocystis lapponica	Basidiomycota	Agaricomycetes	Polyporales	Dacryobolaceae	JGI/Mycocosm	Amylap1_1	20/04/2021	Hage, H.; Miyauchi, S.; Virágh, M.; Drula, E.; Min, B.; Chaduli, D.; Navarro, D.; Favel, A.; Norest, M.; Lesage-Meessen, L.; Bálint, B.; Merényi, Z.; de Eugenio, L.; Morin, E.; Martínez, A.T.; Baldrian, P.; Štursová, M.; Martínez, M.J.; Novotny, C.; Magnuson, J.K.; Spatafora, J.W.; Maurice, S.; Pangilinan, J.; Andreopoulos, W.; LaButti, K.; Hundley, H.; Na, H.; Kuo, A.; Barry, K.; Lipzen, A.; Hen…	33538380	Amylocystis_lapponica	amylocystis_lapponica_skaamylap13	negative
Anaeromyces robustus	Chytridiomycota	Neocallimastigomycetes	Neocallimastigales	Neocallimastigaceae	Ensembl/Fungi	GCA_002104895.1	02/07/2019	Haitjema, C.H.; Gilmore, S.P.; Henske, J.K.; Solomon, K.V.; de Groot, R.; Kuo, A.; Mondo, S.J.; Salamov, A.A.; LaButti, K.; Zhao, Z.; Chiniquy, J.; Barry, K.; Brewer, H.M.; Purvine, S.O.; Wright, A.T.; Hainaut, M.; Boxma, B.; van Alen, T.; Hackstein, J.H.P.; Henrissat, B.; Baker, S.E.; Grigoriev, I.V.; O'Malley, M.A. A parts list for fungal cellulosomes revealed by comparative genomics. 2017, Nat…	28555641	Anaeromyces_robustus	anaeromyces_robustus_gca_002104895	negative
Anthracocystis flocculosa PF-1	Basidiomycota	Ustilaginomycetes	Ustilaginales	Ustilaginaceae	NCBI/RefSeq	GCF_000417875.1	01/06/2019	Lefebvre, F.; Joly, D.L.; Labbé, C.; Teichmann, B.; Linning, R.; Belzile, F.; Bakkeren, G.; Bélanger, R.R. The transition from a phytopathogenic smut ancestor to an anamorphic biocontrol agent deciphered by comparative whole-genome analysis. 2013, Plant Cell 25(6):1946-59	23800965	Anthracocystis_flocculosa_PF-1	Anthracocystis_flocculosa	negative
Antrodia serialis	Basidiomycota	Agaricomycetes	Polyporales	Fomitopsidaceae	JGI/Mycocosm	Antser1	20/04/2021	Hage, H.; Miyauchi, S.; Virágh, M.; Drula, E.; Min, B.; Chaduli, D.; Navarro, D.; Favel, A.; Norest, M.; Lesage-Meessen, L.; Bálint, B.; Merényi, Z.; de Eugenio, L.; Morin, E.; Martínez, A.T.; Baldrian, P.; Štursová, M.; Martínez, M.J.; Novotny, C.; Magnuson, J.K.; Spatafora, J.W.; Maurice, S.; Pangilinan, J.; Andreopoulos, W.; LaButti, K.; Hundley, H.; Na, H.; Kuo, A.; Barry, K.; Lipzen, A.; Hen…	33538380	Antrodia_serialis	antrodia_serialis_sig1antser10	negative
Apiotrichum porosum	Basidiomycota	Tremellomycetes	Trichosporonales	Trichosporonaceae	NCBI/RefSeq	GCF_003942205.1	01/07/2019	Gorte, O.; Aliyu, H.; Neumann, A.; Ochsenreither, K. Draft Genome Sequence of the Oleaginous Yeast <i>Apiotrichum porosum</i> (syn. <i>Trichosporon porosum</i>) DSM 27194. 2019, J Genomics 7(None):11-13	30820256	Apiotrichum_porosum	Apiotrichum_porosum	negative
Aplosporella prunicola	Ascomycota	Dothideomycetes	Botryosphaeriales	Aplosporellaceae	JGI/Mycocosm	Aplpr1	20/04/2021	Haridas, S.; Albert, R.; Binder, M.; Bloem, J.; LaButti, K.; Salamov, A.; Andreopoulos, B.; Baker, S.E.; Barry, K.; Bills, G.; Bluhm, B.H.; Cannon, C.; Castanera, R.; Culley, D.E.; Daum, C.; Ezra, D.; González, J.B.; Henrissat, B.; Kuo, A.; Liang, C.; Lipzen, A.; Lutzoni, F.; Magnuson, J.; Mondo, S.J.; Nolan, M.; Ohm, R.A.; Pangilinan, J.; Park, H.J.; Ramírez, L.; Alfaro, M.; Sun, H.; Tritt, A.; …	32206138	Aplosporella_prunicola	aplosporella_prunicola_cbs_121.167	positive
Armillaria cepistipes	Basidiomycota	Agaricomycetes	Agaricales	Physalacriaceae	JGI/Mycocosm	Armcep1	01/06/2019	Sipos, G.; Prasanna, A.N.; Walter, M.C.; O'Connor, E.; Bálint, B.; Krizsán, K.; Kiss, B.; Hess, J.; Varga, T.; Slot, J.; Riley, R.; Bóka, B.; Rigling, D.; Barry, K.; Lee, J.; Mihaltcheva, S.; LaButti, K.; Lipzen, A.; Waldron, R.; Moloney, N.M.; Sperisen, C.; Kredics, L.; Vágvölgyi, C.; Patrignani, A.; Fitzpatrick, D.; Nagy, I.; Doyle, S.; Anderson, J.B.; Grigoriev, I.V.; Güldener, U.; Münsterkött…	29085064	Armillaria_cepistipes	armillaria_cepistipes_b5	negative
Armillaria gallica	Basidiomycota	Agaricomycetes	Agaricales	Physalacriaceae	Ensembl/Fungi	GCA_002307695.1	02/07/2019	Sipos, G.; Prasanna, A.N.; Walter, M.C.; O'Connor, E.; Bálint, B.; Krizsán, K.; Kiss, B.; Hess, J.; Varga, T.; Slot, J.; Riley, R.; Bóka, B.; Rigling, D.; Barry, K.; Lee, J.; Mihaltcheva, S.; LaButti, K.; Lipzen, A.; Waldron, R.; Moloney, N.M.; Sperisen, C.; Kredics, L.; Vágvölgyi, C.; Patrignani, A.; Fitzpatrick, D.; Nagy, I.; Doyle, S.; Anderson, J.B.; Grigoriev, I.V.; Güldener, U.; Münsterkött…	29085064	Armillaria_gallica	armillaria_gallica_gca_002307695	negative
Armillaria mellea DSM 3731	Basidiomycota	Agaricomycetes	Agaricales	Physalacriaceae	JGI/Mycocosm	Armme1_1	01/06/2019	Collins, C.; Keane, T.M.; Turner, D.J.; O'Keeffe, G.; Fitzpatrick, D.A.; Doyle, S. Genomic and proteomic dissection of the ubiquitous plant pathogen, Armillaria mellea: toward a new infection model system. 2013, J Proteome Res 12(6):2552-70	23656496	Armillaria_mellea_DSM_3731	armillaria_mellea_dsm_3731	negative
Armillaria ostoyae	Basidiomycota	Agaricomycetes	Agaricales	Physalacriaceae	Ensembl/Fungi	GCA_900157425.1	02/07/2019	Sipos, G.; Prasanna, A.N.; Walter, M.C.; O'Connor, E.; Bálint, B.; Krizsán, K.; Kiss, B.; Hess, J.; Varga, T.; Slot, J.; Riley, R.; Bóka, B.; Rigling, D.; Barry, K.; Lee, J.; Mihaltcheva, S.; LaButti, K.; Lipzen, A.; Waldron, R.; Moloney, N.M.; Sperisen, C.; Kredics, L.; Vágvölgyi, C.; Patrignani, A.; Fitzpatrick, D.; Nagy, I.; Doyle, S.; Anderson, J.B.; Grigoriev, I.V.; Güldener, U.; Münsterkött…	29085064	Armillaria_ostoyae	armillaria_ostoyae_gca_900157425	negative
Armillaria solidipes	Basidiomycota	Agaricomycetes	Agaricales	Physalacriaceae	Ensembl/Fungi	GCA_002307675.1	02/07/2019	Sipos, G.; Prasanna, A.N.; Walter, M.C.; O'Connor, E.; Bálint, B.; Krizsán, K.; Kiss, B.; Hess, J.; Varga, T.; Slot, J.; Riley, R.; Bóka, B.; Rigling, D.; Barry, K.; Lee, J.; Mihaltcheva, S.; LaButti, K.; Lipzen, A.; Waldron, R.; Moloney, N.M.; Sperisen, C.; Kredics, L.; Vágvölgyi, C.; Patrignani, A.; Fitzpatrick, D.; Nagy, I.; Doyle, S.; Anderson, J.B.; Grigoriev, I.V.; Güldener, U.; Münsterkött…	29085064	Armillaria_solidipes	armillaria_solidipes_gca_002307675	negative
Arthrobotrys flagrans	Ascomycota	Orbiliomycetes	Orbiliales	Orbiliaceae	NCBI/GenBank	GCA_004000055.1	17/05/2021	Youssar, L.; Wernet, V.; Hensel, N.; Yu, X.; Hildebrand, H.G.; Schreckenberger, B.; Kriegler, M.; Hetzer, B.; Frankino, P.; Dillin, A.; Fischer, R. Intercellular communication is required for trap formation in the nematode-trapping fungus Duddingtonia flagrans. 2019, PLoS Genet 15(3):e1008029	30917129	Arthrobotrys_flagrans	Arthrobotrys_flagrans	negative
Arthrobotrys oligospora ATCC 24927	Ascomycota	Orbiliomycetes	Orbiliales	Orbiliaceae	Ensembl/Fungi	GCA_000225545.1	02/07/2019	Yang, J.; Wang, L.; Ji, X.; Feng, Y.; Li, X.; Zou, C.; Xu, J.; Ren, Y.; Mi, Q.; Wu, J.; Liu, S.; Liu, Y.; Huang, X.; Wang, H.; Niu, X.; Li, J.; Liang, L.; Luo, Y.; Ji, K.; Zhou, W.; Yu, Z.; Li, G.; Liu, Y.; Li, L.; Qiao, M.; Feng, L.; Zhang, K.Q. Genomic and proteomic analyses of the fungus Arthrobotrys oligospora provide insights into nematode-trap formation. 2011, PLoS Pathog 7(9):e1002179	21909256	Arthrobotrys_oligospora_ATCC_24927	arthrobotrys_oligospora_atcc_24927_gca_000225545	negative
Ascobolus immersus RN42	Ascomycota	Pezizomycetes	Pezizales	Ascobolaceae	NCBI/GenBank	GCA_003788565.2	01/07/2019	Murat, C.; Payen, T.; Noel, B.; Kuo, A.; Morin, E.; Chen, J.; Kohler, A.; Krizsán, K.; Balestrini, R.; Da Silva, C.; Montanini, B.; Hainaut, M.; Levati, E.; Barry, K.W.; Belfiori, B.; Cichocki, N.; Clum, A.; Dockter, R.B.; Fauchery, L.; Guy, J.; Iotti, M.; Le Tacon, F.; Lindquist, E.A.; Lipzen, A.; Malagnac, F.; Mello, A.; Molinier, V.; Miyauchi, S.; Poulain, J.; Riccioni, C.; Rubini, A.; Sitrit,…	30420746	Ascobolus_immersus_RN42	Ascobolus_immersus	negative
Ascochyta rabiei	Ascomycota	Dothideomycetes	Pleosporales	Didymellaceae	Ensembl/Fungi	GCA_001630375.1	02/07/2019	Verma, S.; Gazara, R.K.; Nizam, S.; Parween, S.; Chattopadhyay, D.; Verma, P.K. Draft genome sequencing and secretome analysis of fungal phytopathogen Ascochyta rabiei provides insight into the necrotrophic effector repertoire. 2016, Sci Rep 6(None):24638	27091329	Ascochyta_rabiei	ascochyta_rabiei_gca_001630375	negative
Ascocoryne sarcoides NRRL 50072	Ascomycota	Leotiomycetes	Helotiales	Helotiaceae	JGI/Mycocosm	Ascsa1	01/06/2019	Gianoulis, T.A.; Griffin, M.A.; Spakowicz, D.J.; Dunican, B.F.; Alpha, C.J.; Sboner, A.; Sismour, A.M.; Kodira, C.; Egholm, M.; Church, G.M.; Gerstein, M.B.; Strobel, S.A. Genomic analysis of the hydrocarbon-producing, cellulolytic, endophytic fungus Ascocoryne sarcoides. 2012, PLoS Genet 8(3):e1002558	22396667	Ascocoryne_sarcoides_NRRL_50072	ascocoryne_sarcoides_nrrl50072	negative
Ascodesmis nigricans	Ascomycota	Pezizomycetes	Pezizales	Ascodesmidaceae	NCBI/GenBank	GCA_004786065.1	01/07/2019	Lütkenhaus, R.; Traeger, S.; Breuer, J.; Carreté, L.; Kuo, A.; Lipzen, A.; Pangilinan, J.; Dilworth, D.; Sandor, L.; Pöggeler, S.; Gabaldón, T.; Barry, K.; Grigoriev, I.V.; Nowrousian, M. Comparative Genomics and Transcriptomics To Analyze Fruiting Body Development in Filamentous Ascomycetes. 2019, Genetics 213(4):1545-1563	31604798	Ascodesmis_nigricans	Ascodesmis_nigricans	negative
Ascoidea rubescens DSM 1968	Ascomycota	Saccharomycetes	Saccharomycetales	Ascoideaceae	Ensembl/Fungi	GCA_001661345.1	02/07/2019	Riley, R.; Haridas, S.; Wolfe, K.H.; Lopes, M.R.; Hittinger, C.T.; Göker, M.; Salamov, A.A.; Wisecaver, J.H.; Long, T.M.; Calvey, C.H.; Aerts, A.L.; Barry, K.W.; Choi, C.; Clum, A.; Coughlan, A.Y.; Deshpande, S.; Douglass, A.P.; Hanson, S.J.; Klenk, H.P.; LaButti, K.M.; Lapidus, A.; Lindquist, E.A.; Lipzen, A.M.; Meier-Kolthoff, J.P.; Ohm, R.A.; Otillar, R.P.; Pangilinan, J.L.; Peng, Y.; Rokas, A…	27535936	Ascoidea_rubescens_DSM_1968	ascoidea_rubescens_dsm_1968_gca_001661345	negative
Ascosphaera apis ARSEF 7405	Ascomycota	Eurotiomycetes	Onygenales	Ascosphaeraceae	Ensembl/Fungi	GCA_001636715.1	02/07/2019	Shang, Y.; Xiao, G.; Zheng, P.; Cen, K.; Zhan, S.; Wang, C. Divergent and Convergent Evolution of Fungal Pathogenicity. 2016, Genome Biol Evol 8(5):1374-87	27071652	Ascosphaera_apis_ARSEF_7405	ascosphaera_apis_arsef_7405_gca_001636715	negative
Aspergillus aculeatinus CBS 121060	Ascomycota	Eurotiomycetes	Eurotiales	Aspergillaceae	Ensembl/Fungi	GCA_003184765.1	02/07/2019	Vesth, T.C.; Nybo, J.L.; Theobald, S.; Frisvad, J.C.; Larsen, T.O.; Nielsen, K.F.; Hoof, J.B.; Brandl, J.; Salamov, A.; Riley, R.; Gladden, J.M.; Phatale, P.; Nielsen, M.T.; Lyhne, E.K.; Kogle, M.E.; Strasser, K.; McDonnell, E.; Barry, K.; Clum, A.; Chen, C.; LaButti, K.; Haridas, S.; Nolan, M.; Sandor, L.; Kuo, A.; Lipzen, A.; Hainaut, M.; Drula, E.; Tsang, A.; Magnuson, J.K.; Henrissat, B.; Wie…	30349117	Aspergillus_aculeatinus_CBS_121060	aspergillus_aculeatinus_cbs_121060_gca_003184765	negative
Aspergillus aculeatus ATCC 16872	Ascomycota	Eurotiomycetes	Eurotiales	Aspergillaceae	Ensembl/Fungi	GCA_001890905.1	02/07/2019	de Vries, R.P.; Riley, R.; Wiebenga, A.; Aguilar-Osorio, G.; Amillis, S.; Uchima, C.A.; Anderluh, G.; Asadollahi, M.; Askin, M.; Barry, K.; Battaglia, E.; Bayram, Ö.; Benocci, T.; Braus-Stromeyer, S.A.; Caldana, C.; Cánovas, D.; Cerqueira, G.C.; Chen, F.; Chen, W.; Choi, C.; Clum, A.; Dos Santos, R.A.; Damásio, A.R.; Diallinas, G.; Emri, T.; Fekete, E.; Flipphi, M.; Freyberg, S.; Gallo, A.; Gourn…	28196534	Aspergillus_aculeatus_ATCC_16872	aspergillus_aculeatus_atcc_16872_gca_001890905	negative
Aspergillus albertensis	Ascomycota	Eurotiomycetes	Eurotiales	Aspergillaceae	JGI/Mycocosm	Aspalbe1	20/04/2021	Kjærbølling, I.; Vesth, T.; Frisvad, J.C.; Nybo, J.L.; Theobald, S.; Kildgaard, S.; Petersen, T.I.; Kuo, A.; Sato, A.; Lyhne, E.K.; Kogle, M.E.; Wiebenga, A.; Kun, R.S.; Lubbers, R.J.M.; Mäkelä, M.R.; Barry, K.; Chovatia, M.; Clum, A.; Daum, C.; Haridas, S.; He, G.; LaButti, K.; Lipzen, A.; Mondo, S.; Pangilinan, J.; Riley, R.; Salamov, A.; Simmons, B.A.; Magnuson, J.K.; Henrissat, B.; Mortensen,…	32107379	Aspergillus_alliaceus	aspergillus_albertensis	negative
Aspergillus alliaceus	Ascomycota	Eurotiomycetes	Eurotiales	Aspergillaceae	JGI/Mycocosm	Aspalli1	20/04/2021	Kjærbølling, I.; Vesth, T.; Frisvad, J.C.; Nybo, J.L.; Theobald, S.; Kildgaard, S.; Petersen, T.I.; Kuo, A.; Sato, A.; Lyhne, E.K.; Kogle, M.E.; Wiebenga, A.; Kun, R.S.; Lubbers, R.J.M.; Mäkelä, M.R.; Barry, K.; Chovatia, M.; Clum, A.; Daum, C.; Haridas, S.; He, G.; LaButti, K.; Lipzen, A.; Mondo, S.; Pangilinan, J.; Riley, R.; Salamov, A.; Simmons, B.A.; Magnuson, J.K.; Henrissat, B.; Mortensen,…	32107379	Aspergillus_alliaceus	aspergillus_alliaceus_cbs_536.65	negative
Aspergillus arachidicola	Ascomycota	Eurotiomycetes	Eurotiales	Aspergillaceae	Ensembl/Fungi	GCA_002749805.1	02/07/2019	Moore, G.G.; Mack, B.M.; Beltz, S.B.; Puel, O. Genome sequence of an aflatoxigenic pathogen of Argentinian peanut, Aspergillus arachidicola. 2018, BMC Genomics 19(1):189	29523080	Aspergillus_arachidicola	aspergillus_arachidicola_gca_002749805	negative
Aspergillus avenaceus	Ascomycota	Eurotiomycetes	Eurotiales	Aspergillaceae	JGI/Mycocosm	Aspave1	20/04/2021	Kjærbølling, I.; Vesth, T.; Frisvad, J.C.; Nybo, J.L.; Theobald, S.; Kildgaard, S.; Petersen, T.I.; Kuo, A.; Sato, A.; Lyhne, E.K.; Kogle, M.E.; Wiebenga, A.; Kun, R.S.; Lubbers, R.J.M.; Mäkelä, M.R.; Barry, K.; Chovatia, M.; Clum, A.; Daum, C.; Haridas, S.; He, G.; LaButti, K.; Lipzen, A.; Mondo, S.; Pangilinan, J.; Riley, R.; Salamov, A.; Simmons, B.A.; Magnuson, J.K.; Henrissat, B.; Mortensen,…	32107379	Aspergillus_avenaceus	aspergillus_avenaceus_ibt_18842	negative
Aspergillus awamori	Ascomycota	Eurotiomycetes	Eurotiales	Aspergillaceae	NCBI/GenBank	GCA_003850985.1	01/07/2019	Shimizu, M.; Kusuya, Y.; Alimu, Y.; Bian, C.; Takahashi, H.; Yaguchi, T. Draft Genome Sequence of <i>Aspergillus awamori</i> IFM 58123<sup>NT</sup>. 2019, Microbiol Resour Announc 8(4):None	30701239	Aspergillus_awamori	Aspergillus_awamori	negative
Aspergillus bertholletiae	Ascomycota	Eurotiomycetes	Eurotiales	Aspergillaceae	JGI/Mycocosm	Aspber1	20/04/2021	Kjærbølling, I.; Vesth, T.; Frisvad, J.C.; Nybo, J.L.; Theobald, S.; Kildgaard, S.; Petersen, T.I.; Kuo, A.; Sato, A.; Lyhne, E.K.; Kogle, M.E.; Wiebenga, A.; Kun, R.S.; Lubbers, R.J.M.; Mäkelä, M.R.; Barry, K.; Chovatia, M.; Clum, A.; Daum, C.; Haridas, S.; He, G.; LaButti, K.; Lipzen, A.; Mondo, S.; Pangilinan, J.; Riley, R.; Salamov, A.; Simmons, B.A.; Magnuson, J.K.; Henrissat, B.; Mortensen,…	32107379	Aspergillus_bertholletiae	aspergillus_bertholletius_ibt_29228	negative
Aspergillus bombycis	Ascomycota	Eurotiomycetes	Eurotiales	Aspergillaceae	Ensembl/Fungi	GCA_001792695.1	02/07/2019	Moore, G.G.; Mack, B.M.; Beltz, S.B.; Gilbert, M.K. Draft Genome Sequence of an Aflatoxigenic Aspergillus Species, A. bombycis. 2016, Genome Biol Evol 8(11):3297-3300	27664179	Aspergillus_bombycis	aspergillus_bombycis_gca_001792695	negative
Aspergillus brasiliensis CBS 101740	Ascomycota	Eurotiomycetes	Eurotiales	Aspergillaceae	Ensembl/Fungi	GCA_001889945.1	02/07/2019	de Vries, R.P.; Riley, R.; Wiebenga, A.; Aguilar-Osorio, G.; Amillis, S.; Uchima, C.A.; Anderluh, G.; Asadollahi, M.; Askin, M.; Barry, K.; Battaglia, E.; Bayram, Ö.; Benocci, T.; Braus-Stromeyer, S.A.; Caldana, C.; Cánovas, D.; Cerqueira, G.C.; Chen, F.; Chen, W.; Choi, C.; Clum, A.; Dos Santos, R.A.; Damásio, A.R.; Diallinas, G.; Emri, T.; Fekete, E.; Flipphi, M.; Freyberg, S.; Gallo, A.; Gourn…	28196534	Aspergillus_brasiliensis_CBS_101740	aspergillus_brasiliensis_cbs_101740_gca_001889945	negative
Aspergillus brunneoviolaceus CBS 621.78	Ascomycota	Eurotiomycetes	Eurotiales	Aspergillaceae	Ensembl/Fungi	GCA_003184695.1	02/07/2019	Vesth, T.C.; Nybo, J.L.; Theobald, S.; Frisvad, J.C.; Larsen, T.O.; Nielsen, K.F.; Hoof, J.B.; Brandl, J.; Salamov, A.; Riley, R.; Gladden, J.M.; Phatale, P.; Nielsen, M.T.; Lyhne, E.K.; Kogle, M.E.; Strasser, K.; McDonnell, E.; Barry, K.; Clum, A.; Chen, C.; LaButti, K.; Haridas, S.; Nolan, M.; Sandor, L.; Kuo, A.; Lipzen, A.; Hainaut, M.; Drula, E.; Tsang, A.; Magnuson, J.K.; Henrissat, B.; Wie…	30349117	Aspergillus_brunneoviolaceus_CBS_621.78	aspergillus_brunneoviolaceus_cbs_621_78_gca_003184695	negative
Aspergillus burnettii	Ascomycota	Eurotiomycetes	Eurotiales	Aspergillaceae	NCBI/GenBank	GCA_013421405.2	17/05/2021	Gilchrist, C.L.M.; Lacey, H.J.; Vuong, D.; Pitt, J.I.; Lange, L.; Lacey, E.; Pilgaard, B.; Chooi, Y.H.; Piggott, A.M. Comprehensive chemotaxonomic and genomic profiling of a biosynthetically talented Australian fungus, Aspergillus burnettii sp. nov. 2020, Fungal Genet Biol 143(None):103435	32702474	Aspergillus_burnettii	Aspergillus_burnettii	negative
Aspergillus caelatus	Ascomycota	Eurotiomycetes	Eurotiales	Aspergillaceae	JGI/Mycocosm	Aspcae1	20/04/2021	Kjærbølling, I.; Vesth, T.; Frisvad, J.C.; Nybo, J.L.; Theobald, S.; Kildgaard, S.; Petersen, T.I.; Kuo, A.; Sato, A.; Lyhne, E.K.; Kogle, M.E.; Wiebenga, A.; Kun, R.S.; Lubbers, R.J.M.; Mäkelä, M.R.; Barry, K.; Chovatia, M.; Clum, A.; Daum, C.; Haridas, S.; He, G.; LaButti, K.; Lipzen, A.; Mondo, S.; Pangilinan, J.; Riley, R.; Salamov, A.; Simmons, B.A.; Magnuson, J.K.; Henrissat, B.; Mortensen,…	32107379	Aspergillus_caelatus	aspergillus_caelatus_cbs_763.97	negative
Aspergillus calidoustus	Ascomycota	Eurotiomycetes	Eurotiales	Aspergillaceae	Ensembl/Fungi	GCA_001511075.1	02/07/2019	Horn, F.; Linde, J.; Mattern, D.J.; Walther, G.; Guthke, R.; Scherlach, K.; Martin, K.; Brakhage, A.A.; Petzke, L.; Valiante, V. Draft Genome Sequences of Fungus Aspergillus calidoustus. 2016, Genome Announc 4(2):None	26966204	Aspergillus_calidoustus	aspergillus_calidoustus_gca_001511075	negative
Aspergillus campestris IBT 28561	Ascomycota	Eurotiomycetes	Eurotiales	Aspergillaceae	Ensembl/Fungi	GCA_002847485.1	02/07/2019	Kjærbølling, I.; Vesth, T.C.; Frisvad, J.C.; Nybo, J.L.; Theobald, S.; Kuo, A.; Bowyer, P.; Matsuda, Y.; Mondo, S.; Lyhne, E.K.; Kogle, M.E.; Clum, A.; Lipzen, A.; Salamov, A.; Ngan, C.Y.; Daum, C.; Chiniquy, J.; Barry, K.; LaButti, K.; Haridas, S.; Simmons, B.A.; Magnuson, J.K.; Mortensen, U.H.; Larsen, T.O.; Grigoriev, I.V.; Baker, S.E.; Andersen, M.R. Linking secondary metabolites to gene clus…	29317534	Aspergillus_campestris_IBT_28561	aspergillus_campestris_ibt_28561_gca_002847485	negative
Aspergillus candidus	Ascomycota	Eurotiomycetes	Eurotiales	Aspergillaceae	Ensembl/Fungi	GCA_002847045.1	02/07/2019	Kjærbølling, I.; Vesth, T.C.; Frisvad, J.C.; Nybo, J.L.; Theobald, S.; Kuo, A.; Bowyer, P.; Matsuda, Y.; Mondo, S.; Lyhne, E.K.; Kogle, M.E.; Clum, A.; Lipzen, A.; Salamov, A.; Ngan, C.Y.; Daum, C.; Chiniquy, J.; Barry, K.; LaButti, K.; Haridas, S.; Simmons, B.A.; Magnuson, J.K.; Mortensen, U.H.; Larsen, T.O.; Grigoriev, I.V.; Baker, S.E.; Andersen, M.R. Linking secondary metabolites to gene clus…	29317534	Aspergillus_candidus	aspergillus_candidus_gca_002847045	negative
Aspergillus carbonarius ITEM 5010	Ascomycota	Eurotiomycetes	Eurotiales	Aspergillaceae	Ensembl/Fungi	GCA_001990825.1	02/07/2019	de Vries, R.P.; Riley, R.; Wiebenga, A.; Aguilar-Osorio, G.; Amillis, S.; Uchima, C.A.; Anderluh, G.; Asadollahi, M.; Askin, M.; Barry, K.; Battaglia, E.; Bayram, Ö.; Benocci, T.; Braus-Stromeyer, S.A.; Caldana, C.; Cánovas, D.; Cerqueira, G.C.; Chen, F.; Chen, W.; Choi, C.; Clum, A.; Dos Santos, R.A.; Damásio, A.R.; Diallinas, G.; Emri, T.; Fekete, E.; Flipphi, M.; Freyberg, S.; Gallo, A.; Gourn…	28196534	Aspergillus_carbonarius_ITEM_5010	aspergillus_carbonarius_item_5010_gca_001990825	negative
Aspergillus clavatus NRRL 1	Ascomycota	Eurotiomycetes	Eurotiales	Aspergillaceae	Ensembl/Fungi	GCA_000002715.1	02/07/2019	Arnaud, M.B.; Cerqueira, G.C.; Inglis, D.O.; Skrzypek, M.S.; Binkley, J.; Chibucos, M.C.; Crabtree, J.; Howarth, C.; Orvis, J.; Shah, P.; Wymore, F.; Binkley, G.; Miyasato, S.R.; Simison, M.; Sherlock, G.; Wortman, J.R. The Aspergillus Genome Database (AspGD): recent developments in comprehensive multispecies curation, comparative genomics and community resources. 2012, Nucleic Acids Res 40(None)…	22080559	Aspergillus_clavatus_NRRL_1	aspergillus_clavatus	negative
Aspergillus coremiiformis	Ascomycota	Eurotiomycetes	Eurotiales	Aspergillaceae	JGI/Mycocosm	Aspcor1	20/04/2021	Kjærbølling, I.; Vesth, T.; Frisvad, J.C.; Nybo, J.L.; Theobald, S.; Kildgaard, S.; Petersen, T.I.; Kuo, A.; Sato, A.; Lyhne, E.K.; Kogle, M.E.; Wiebenga, A.; Kun, R.S.; Lubbers, R.J.M.; Mäkelä, M.R.; Barry, K.; Chovatia, M.; Clum, A.; Daum, C.; Haridas, S.; He, G.; LaButti, K.; Lipzen, A.; Mondo, S.; Pangilinan, J.; Riley, R.; Salamov, A.; Simmons, B.A.; Magnuson, J.K.; Henrissat, B.; Mortensen,…	32107379	Aspergillus_coremiiformis	aspergillus_coremiiformis_cbs_553.77	positive
Aspergillus costaricaensis CBS 115574	Ascomycota	Eurotiomycetes	Eurotiales	Aspergillaceae	NCBI/RefSeq	GCF_003184835.1	01/07/2019	Vesth, T.C.; Nybo, J.L.; Theobald, S.; Frisvad, J.C.; Larsen, T.O.; Nielsen, K.F.; Hoof, J.B.; Brandl, J.; Salamov, A.; Riley, R.; Gladden, J.M.; Phatale, P.; Nielsen, M.T.; Lyhne, E.K.; Kogle, M.E.; Strasser, K.; McDonnell, E.; Barry, K.; Clum, A.; Chen, C.; LaButti, K.; Haridas, S.; Nolan, M.; Sandor, L.; Kuo, A.; Lipzen, A.; Hainaut, M.; Drula, E.; Tsang, A.; Magnuson, J.K.; Henrissat, B.; Wie…	30349117	Aspergillus_costaricaensis_CBS_115574	Aspergillus_costaricaensis	negative
Aspergillus cristatus	Ascomycota	Eurotiomycetes	Eurotiales	Aspergillaceae	Ensembl/Fungi	GCA_001717485.1	02/07/2019	Ge, Y.; Wang, Y.; Liu, Y.; Tan, Y.; Ren, X.; Zhang, X.; Hyde, K.D.; Liu, Y.; Liu, Z. Comparative genomic and transcriptomic analyses of the Fuzhuan brick tea-fermentation fungus Aspergillus cristatus. 2016, BMC Genomics 17(None):428	27267057	Aspergillus_cristatus	aspergillus_cristatus_gca_001717485	negative
Aspergillus ellipticus CBS 707.79	Ascomycota	Eurotiomycetes	Eurotiales	Aspergillaceae	Ensembl/Fungi	GCA_003184645.1	02/07/2019	Vesth, T.C.; Nybo, J.L.; Theobald, S.; Frisvad, J.C.; Larsen, T.O.; Nielsen, K.F.; Hoof, J.B.; Brandl, J.; Salamov, A.; Riley, R.; Gladden, J.M.; Phatale, P.; Nielsen, M.T.; Lyhne, E.K.; Kogle, M.E.; Strasser, K.; McDonnell, E.; Barry, K.; Clum, A.; Chen, C.; LaButti, K.; Haridas, S.; Nolan, M.; Sandor, L.; Kuo, A.; Lipzen, A.; Hainaut, M.; Drula, E.; Tsang, A.; Magnuson, J.K.; Henrissat, B.; Wie…	30349117	Aspergillus_ellipticus_CBS_707.79	aspergillus_ellipticus_cbs_707_79_gca_003184645	negative
Aspergillus eucalypticola CBS 122712	Ascomycota	Eurotiomycetes	Eurotiales	Aspergillaceae	Ensembl/Fungi	GCA_003184535.1	02/07/2019	Vesth, T.C.; Nybo, J.L.; Theobald, S.; Frisvad, J.C.; Larsen, T.O.; Nielsen, K.F.; Hoof, J.B.; Brandl, J.; Salamov, A.; Riley, R.; Gladden, J.M.; Phatale, P.; Nielsen, M.T.; Lyhne, E.K.; Kogle, M.E.; Strasser, K.; McDonnell, E.; Barry, K.; Clum, A.; Chen, C.; LaButti, K.; Haridas, S.; Nolan, M.; Sandor, L.; Kuo, A.; Lipzen, A.; Hainaut, M.; Drula, E.; Tsang, A.; Magnuson, J.K.; Henrissat, B.; Wie…	30349117	Aspergillus_eucalypticola_CBS_122712	aspergillus_eucalypticola_cbs_122712_gca_003184535	negative
Aspergillus fijiensis CBS 313.89	Ascomycota	Eurotiomycetes	Eurotiales	Aspergillaceae	NCBI/GenBank	GCA_003184825.1	01/07/2019	Vesth, T.C.; Nybo, J.L.; Theobald, S.; Frisvad, J.C.; Larsen, T.O.; Nielsen, K.F.; Hoof, J.B.; Brandl, J.; Salamov, A.; Riley, R.; Gladden, J.M.; Phatale, P.; Nielsen, M.T.; Lyhne, E.K.; Kogle, M.E.; Strasser, K.; McDonnell, E.; Barry, K.; Clum, A.; Chen, C.; LaButti, K.; Haridas, S.; Nolan, M.; Sandor, L.; Kuo, A.; Lipzen, A.; Hainaut, M.; Drula, E.; Tsang, A.; Magnuson, J.K.; Henrissat, B.; Wie…	30349117	Aspergillus_fijiensis_CBS_313.89	Aspergillus_fijiensis	negative
Aspergillus fischeri NRRL 181	Ascomycota	Eurotiomycetes	Eurotiales	Aspergillaceae	Ensembl/Fungi	GCA_000149645.2	02/07/2019	Arnaud, M.B.; Cerqueira, G.C.; Inglis, D.O.; Skrzypek, M.S.; Binkley, J.; Chibucos, M.C.; Crabtree, J.; Howarth, C.; Orvis, J.; Shah, P.; Wymore, F.; Binkley, G.; Miyasato, S.R.; Simison, M.; Sherlock, G.; Wortman, J.R. The Aspergillus Genome Database (AspGD): recent developments in comprehensive multispecies curation, comparative genomics and community resources. 2012, Nucleic Acids Res 40(None)…	22080559	Aspergillus_fischeri_NRRL_181	neosartorya_fischeri	negative
Aspergillus flavus NRRL3357	Ascomycota	Eurotiomycetes	Eurotiales	Aspergillaceae	Ensembl/Fungi	GCA_000006275.2	02/07/2019	Nierman, W.C.; Yu, J.; Fedorova-Abrams, N.D.; Losada, L.; Cleveland, T.E.; Bhatnagar, D.; Bennett, J.W.; Dean, R.; Payne, G.A. Genome Sequence of Aspergillus flavus NRRL 3357, a Strain That Causes Aflatoxin Contamination of Food and Feed. 2015, Genome Announc 3(2):None	25883274	Aspergillus_flavus_NRRL3357	aspergillus_flavus	negative
Aspergillus fumigatus Af293	Ascomycota	Eurotiomycetes	Eurotiales	Aspergillaceae	Ensembl/Fungi	GCA_000002655.1	02/07/2019	Nierman, W.C.; Pain, A.; Anderson, M.J.; Wortman, J.R.; Kim, H.S.; Arroyo, J.; Berriman, M.; Abe, K.; Archer, D.B.; Bermejo, C.; Bennett, J.; Bowyer, P.; Chen, D.; Collins, M.; Coulsen, R.; Davies, R.; Dyer, P.S.; Farman, M.; Fedorova, N.; Fedorova, N.; Feldblyum, T.V.; Fischer, R.; Fosker, N.; Fraser, A.; García, J.L.; García, M.J.; Goble, A.; Goldman, G.H.; Gomi, K.; Griffith-Jones, S.; Gwillia…	16372009	Aspergillus_fumigatus_Af293	aspergillus_fumigatus	negative
Aspergillus glaucus CBS 516.65	Ascomycota	Eurotiomycetes	Eurotiales	Aspergillaceae	Ensembl/Fungi	GCA_001890805.1	02/07/2019	de Vries, R.P.; Riley, R.; Wiebenga, A.; Aguilar-Osorio, G.; Amillis, S.; Uchima, C.A.; Anderluh, G.; Asadollahi, M.; Askin, M.; Barry, K.; Battaglia, E.; Bayram, Ö.; Benocci, T.; Braus-Stromeyer, S.A.; Caldana, C.; Cánovas, D.; Cerqueira, G.C.; Chen, F.; Chen, W.; Choi, C.; Clum, A.; Dos Santos, R.A.; Damásio, A.R.; Diallinas, G.; Emri, T.; Fekete, E.; Flipphi, M.; Freyberg, S.; Gallo, A.; Gourn…	28196534	Aspergillus_glaucus_CBS_516.65	aspergillus_glaucus_cbs_516_65_gca_001890805	negative
Aspergillus heteromorphus CBS 117.55	Ascomycota	Eurotiomycetes	Eurotiales	Aspergillaceae	Ensembl/Fungi	GCA_003184545.1	02/07/2019	Vesth, T.C.; Nybo, J.L.; Theobald, S.; Frisvad, J.C.; Larsen, T.O.; Nielsen, K.F.; Hoof, J.B.; Brandl, J.; Salamov, A.; Riley, R.; Gladden, J.M.; Phatale, P.; Nielsen, M.T.; Lyhne, E.K.; Kogle, M.E.; Strasser, K.; McDonnell, E.; Barry, K.; Clum, A.; Chen, C.; LaButti, K.; Haridas, S.; Nolan, M.; Sandor, L.; Kuo, A.; Lipzen, A.; Hainaut, M.; Drula, E.; Tsang, A.; Magnuson, J.K.; Henrissat, B.; Wie…	30349117	Aspergillus_heteromorphus_CBS_117.55	aspergillus_heteromorphus_cbs_117_55_gca_003184545	negative
Aspergillus homomorphus CBS 101889	Ascomycota	Eurotiomycetes	Eurotiales	Aspergillaceae	NCBI/RefSeq	GCF_003184865.1	01/07/2019	Vesth, T.C.; Nybo, J.L.; Theobald, S.; Frisvad, J.C.; Larsen, T.O.; Nielsen, K.F.; Hoof, J.B.; Brandl, J.; Salamov, A.; Riley, R.; Gladden, J.M.; Phatale, P.; Nielsen, M.T.; Lyhne, E.K.; Kogle, M.E.; Strasser, K.; McDonnell, E.; Barry, K.; Clum, A.; Chen, C.; LaButti, K.; Haridas, S.; Nolan, M.; Sandor, L.; Kuo, A.; Lipzen, A.; Hainaut, M.; Drula, E.; Tsang, A.; Magnuson, J.K.; Henrissat, B.; Wie…	30349117	Aspergillus_homomorphus_CBS_101889	Aspergillus_homomorphus	negative
Aspergillus ibericus CBS 121593	Ascomycota	Eurotiomycetes	Eurotiales	Aspergillaceae	NCBI/RefSeq	GCF_003184845.1	01/07/2019	Vesth, T.C.; Nybo, J.L.; Theobald, S.; Frisvad, J.C.; Larsen, T.O.; Nielsen, K.F.; Hoof, J.B.; Brandl, J.; Salamov, A.; Riley, R.; Gladden, J.M.; Phatale, P.; Nielsen, M.T.; Lyhne, E.K.; Kogle, M.E.; Strasser, K.; McDonnell, E.; Barry, K.; Clum, A.; Chen, C.; LaButti, K.; Haridas, S.; Nolan, M.; Sandor, L.; Kuo, A.; Lipzen, A.; Hainaut, M.; Drula, E.; Tsang, A.; Magnuson, J.K.; Henrissat, B.; Wie…	30349117	Aspergillus_ibericus_CBS_121593	Aspergillus_ibericus	negative
Aspergillus indologenus CBS 114.80	Ascomycota	Eurotiomycetes	Eurotiales	Aspergillaceae	Ensembl/Fungi	GCA_003184685.1	02/07/2019	Vesth, T.C.; Nybo, J.L.; Theobald, S.; Frisvad, J.C.; Larsen, T.O.; Nielsen, K.F.; Hoof, J.B.; Brandl, J.; Salamov, A.; Riley, R.; Gladden, J.M.; Phatale, P.; Nielsen, M.T.; Lyhne, E.K.; Kogle, M.E.; Strasser, K.; McDonnell, E.; Barry, K.; Clum, A.; Chen, C.; LaButti, K.; Haridas, S.; Nolan, M.; Sandor, L.; Kuo, A.; Lipzen, A.; Hainaut, M.; Drula, E.; Tsang, A.; Magnuson, J.K.; Henrissat, B.; Wie…	30349117	Aspergillus_indologenus_CBS_114.80	aspergillus_indologenus_cbs_114_80_gca_003184685	negative
Aspergillus japonicus CBS 114.51	Ascomycota	Eurotiomycetes	Eurotiales	Aspergillaceae	Ensembl/Fungi	GCA_003184785.1	02/07/2019	Vesth, T.C.; Nybo, J.L.; Theobald, S.; Frisvad, J.C.; Larsen, T.O.; Nielsen, K.F.; Hoof, J.B.; Brandl, J.; Salamov, A.; Riley, R.; Gladden, J.M.; Phatale, P.; Nielsen, M.T.; Lyhne, E.K.; Kogle, M.E.; Strasser, K.; McDonnell, E.; Barry, K.; Clum, A.; Chen, C.; LaButti, K.; Haridas, S.; Nolan, M.; Sandor, L.; Kuo, A.; Lipzen, A.; Hainaut, M.; Drula, E.; Tsang, A.; Magnuson, J.K.; Henrissat, B.; Wie…	30349117	Aspergillus_japonicus_CBS_114.51	aspergillus_japonicus_cbs_114_51_gca_003184785	negative
Aspergillus kawachii IFO 4308	Ascomycota	Eurotiomycetes	Eurotiales	Aspergillaceae	NCBI/GenBank	GCA_000239835.2	01/06/2019	Futagami, T.; Mori, K.; Yamashita, A.; Wada, S.; Kajiwara, Y.; Takashita, H.; Omori, T.; Takegawa, K.; Tashiro, K.; Kuhara, S.; Goto, M. Genome sequence of the white koji mold Aspergillus kawachii IFO 4308, used for brewing the Japanese distilled spirit shochu. 2011, Eukaryot Cell 10(11):1586-7	22045919	Aspergillus_kawachii_IFO_4308	Aspergillus_kawachii	negative
Aspergillus lacticoffeatus	Ascomycota	Eurotiomycetes	Eurotiales	Aspergillaceae	JGI/Mycocosm	Asplac1	01/06/2019	Vesth, T.C.; Nybo, J.L.; Theobald, S.; Frisvad, J.C.; Larsen, T.O.; Nielsen, K.F.; Hoof, J.B.; Brandl, J.; Salamov, A.; Riley, R.; Gladden, J.M.; Phatale, P.; Nielsen, M.T.; Lyhne, E.K.; Kogle, M.E.; Strasser, K.; McDonnell, E.; Barry, K.; Clum, A.; Chen, C.; LaButti, K.; Haridas, S.; Nolan, M.; Sandor, L.; Kuo, A.; Lipzen, A.; Hainaut, M.; Drula, E.; Tsang, A.; Magnuson, J.K.; Henrissat, B.; Wie…	30349117	Aspergillus_lacticoffeatus	aspergillus_niger_lacticoffeatus_cbs_101883	negative
Aspergillus leporis	Ascomycota	Eurotiomycetes	Eurotiales	Aspergillaceae	JGI/Mycocosm	Asplep1	20/04/2021	Kjærbølling, I.; Vesth, T.; Frisvad, J.C.; Nybo, J.L.; Theobald, S.; Kildgaard, S.; Petersen, T.I.; Kuo, A.; Sato, A.; Lyhne, E.K.; Kogle, M.E.; Wiebenga, A.; Kun, R.S.; Lubbers, R.J.M.; Mäkelä, M.R.; Barry, K.; Chovatia, M.; Clum, A.; Daum, C.; Haridas, S.; He, G.; LaButti, K.; Lipzen, A.; Mondo, S.; Pangilinan, J.; Riley, R.; Salamov, A.; Simmons, B.A.; Magnuson, J.K.; Henrissat, B.; Mortensen,…	32107379	Aspergillus_leporis	aspergillus_leporis_cbs_151.66	negative
Aspergillus luchuensis CBS 106.47	Ascomycota	Eurotiomycetes	Eurotiales	Aspergillaceae	Ensembl/Fungi	GCA_001890685.1	02/07/2019	de Vries, R.P.; Riley, R.; Wiebenga, A.; Aguilar-Osorio, G.; Amillis, S.; Uchima, C.A.; Anderluh, G.; Asadollahi, M.; Askin, M.; Barry, K.; Battaglia, E.; Bayram, Ö.; Benocci, T.; Braus-Stromeyer, S.A.; Caldana, C.; Cánovas, D.; Cerqueira, G.C.; Chen, F.; Chen, W.; Choi, C.; Clum, A.; Dos Santos, R.A.; Damásio, A.R.; Diallinas, G.; Emri, T.; Fekete, E.; Flipphi, M.; Freyberg, S.; Gallo, A.; Gourn…	28196534	Aspergillus_luchuensis_CBS_106.47	aspergillus_luchuensis_cbs_106_47_gca_001890685	negative
Aspergillus minisclerotigenes	Ascomycota	Eurotiomycetes	Eurotiales	Aspergillaceae	JGI/Mycocosm	Aspmin1	20/04/2021	Kjærbølling, I.; Vesth, T.; Frisvad, J.C.; Nybo, J.L.; Theobald, S.; Kildgaard, S.; Petersen, T.I.; Kuo, A.; Sato, A.; Lyhne, E.K.; Kogle, M.E.; Wiebenga, A.; Kun, R.S.; Lubbers, R.J.M.; Mäkelä, M.R.; Barry, K.; Chovatia, M.; Clum, A.; Daum, C.; Haridas, S.; He, G.; LaButti, K.; Lipzen, A.; Mondo, S.; Pangilinan, J.; Riley, R.; Salamov, A.; Simmons, B.A.; Magnuson, J.K.; Henrissat, B.; Mortensen,…	32107379	Aspergillus_minisclerotigenes	aspergillus_minisclerotigenes_cbs_117635	negative
Aspergillus mulundensis	Ascomycota	Eurotiomycetes	Eurotiales	Aspergillaceae	NCBI/RefSeq	GCF_003369625.1	01/07/2019	Wingfield, B.D.; Bills, G.F.; Dong, Y.; Huang, W.; Nel, W.J.; Swalarsk-Parry, B.S.; Vaghefi, N.; Wilken, P.M.; An, Z.; de Beer, Z.W.; De Vos, L.; Chen, L.; Duong, T.A.; Gao, Y.; Hammerbacher, A.; Kikkert, J.R.; Li, Y.; Li, H.; Li, K.; Li, Q.; Liu, X.; Ma, X.; Naidoo, K.; Pethybridge, S.J.; Sun, J.; Steenkamp, E.T.; van der Nest, M.A.; van Wyk, S.; Wingfield, M.J.; Xiong, C.; Yue, Q.; Zhang, X. IM…	30018880	Aspergillus_mulundensis	Aspergillus_mulundensis	negative
Aspergillus nanangensis	Ascomycota	Eurotiomycetes	Eurotiales	Aspergillaceae	NCBI/GenBank	GCA_015844325.1	17/05/2021	Lacey, H.J.; Gilchrist, C.L.M.; Crombie, A.; Kalaitzis, J.A.; Vuong, D.; Rutledge, P.J.; Turner, P.; Pitt, J.I.; Lacey, E.; Chooi, Y.H.; Piggott, A.M. Nanangenines: drimane sesquiterpenoids as the dominant metabolite cohort of a novel Australian fungus, <i>Aspergillus nanangensis</i>. 2019, Beilstein J Org Chem 15(None):2631-2643	31807198	Aspergillus_nanangensis	Aspergillus_nanangensis	negative
Aspergillus neoniger CBS 115656	Ascomycota	Eurotiomycetes	Eurotiales	Aspergillaceae	Ensembl/Fungi	GCA_003184625.1	02/07/2019	Vesth, T.C.; Nybo, J.L.; Theobald, S.; Frisvad, J.C.; Larsen, T.O.; Nielsen, K.F.; Hoof, J.B.; Brandl, J.; Salamov, A.; Riley, R.; Gladden, J.M.; Phatale, P.; Nielsen, M.T.; Lyhne, E.K.; Kogle, M.E.; Strasser, K.; McDonnell, E.; Barry, K.; Clum, A.; Chen, C.; LaButti, K.; Haridas, S.; Nolan, M.; Sandor, L.; Kuo, A.; Lipzen, A.; Hainaut, M.; Drula, E.; Tsang, A.; Magnuson, J.K.; Henrissat, B.; Wie…	30349117	Aspergillus_neoniger_CBS_115656	aspergillus_neoniger_cbs_115656_gca_003184625	negative
Aspergillus nidulans FGSC A4	Ascomycota	Eurotiomycetes	Eurotiales	Aspergillaceae	NCBI/RefSeq	GCF_000149205.1	01/06/2019	Galagan, J.E.; Calvo, S.E.; Cuomo, C.; Ma, L.J.; Wortman, J.R.; Batzoglou, S.; Lee, S.I.; Baştürkmen, M.; Spevak, C.C.; Clutterbuck, J.; Kapitonov, V.; Jurka, J.; Scazzocchio, C.; Farman, M.; Butler, J.; Purcell, S.; Harris, S.; Braus, G.H.; Draht, O.; Busch, S.; D'Enfert, C.; Bouchier, C.; Goldman, G.H.; Bell-Pedersen, D.; Griffiths-Jones, S.; Doonan, J.H.; Yu, J.; Vienken, K.; Pain, A.; Freitag…	16372000	Aspergillus_nidulans_FGSC_A4	Aspergillus_nidulans	negative
Aspergillus niger	Ascomycota	Eurotiomycetes	Eurotiales	Aspergillaceae	Ensembl/Fungi	GCA_000002855.2	02/07/2019	Pel, H.J.; de Winde, J.H.; Archer, D.B.; Dyer, P.S.; Hofmann, G.; Schaap, P.J.; Turner, G.; de Vries, R.P.; Albang, R.; Albermann, K.; Andersen, M.R.; Bendtsen, J.D.; Benen, J.A.; van den Berg, M.; Breestraat, S.; Caddick, M.X.; Contreras, R.; Cornell, M.; Coutinho, P.M.; Danchin, E.G.; Debets, A.J.; Dekker, P.; van Dijck, P.W.; van Dijk, A.; Dijkhuizen, L.; Driessen, A.J.; d'Enfert, C.; Geysens,…	17259976	Aspergillus_niger	aspergillus_niger	negative
Aspergillus nomiae	Ascomycota	Eurotiomycetes	Eurotiales	Aspergillaceae	JGI/Mycocosm	Aspnom1	20/04/2021	Kjærbølling, I.; Vesth, T.; Frisvad, J.C.; Nybo, J.L.; Theobald, S.; Kildgaard, S.; Petersen, T.I.; Kuo, A.; Sato, A.; Lyhne, E.K.; Kogle, M.E.; Wiebenga, A.; Kun, R.S.; Lubbers, R.J.M.; Mäkelä, M.R.; Barry, K.; Chovatia, M.; Clum, A.; Daum, C.; Haridas, S.; He, G.; LaButti, K.; Lipzen, A.; Mondo, S.; Pangilinan, J.; Riley, R.; Salamov, A.; Simmons, B.A.; Magnuson, J.K.; Henrissat, B.; Mortensen,…	32107379	Aspergillus_nomiae	aspergillus_nomius_ibt_12657	negative
Aspergillus nomius NRRL 13137	Ascomycota	Eurotiomycetes	Eurotiales	Aspergillaceae	Ensembl/Fungi	GCA_001204775.1	02/07/2019	Moore, G.G.; Mack, B.M.; Beltz, S.B. Genomic sequence of the aflatoxigenic filamentous fungus Aspergillus nomius. 2015, BMC Genomics 16(None):551	26216546	Aspergillus_nomius_NRRL_13137	aspergillus_nomius_nrrl_13137_gca_001204775	negative
Aspergillus novofumigatus IBT 16806	Ascomycota	Eurotiomycetes	Eurotiales	Aspergillaceae	Ensembl/Fungi	GCA_002847465.1	02/07/2019	Kjærbølling, I.; Vesth, T.C.; Frisvad, J.C.; Nybo, J.L.; Theobald, S.; Kuo, A.; Bowyer, P.; Matsuda, Y.; Mondo, S.; Lyhne, E.K.; Kogle, M.E.; Clum, A.; Lipzen, A.; Salamov, A.; Ngan, C.Y.; Daum, C.; Chiniquy, J.; Barry, K.; LaButti, K.; Haridas, S.; Simmons, B.A.; Magnuson, J.K.; Mortensen, U.H.; Larsen, T.O.; Grigoriev, I.V.; Baker, S.E.; Andersen, M.R. Linking secondary metabolites to gene clus…	29317534	Aspergillus_novofumigatus_IBT_16806	aspergillus_novofumigatus_ibt_16806_gca_002847465	positive
Aspergillus novoparasiticus	Ascomycota	Eurotiomycetes	Eurotiales	Aspergillaceae	JGI/Mycocosm	Aspnovo1	20/04/2021	Kjærbølling, I.; Vesth, T.; Frisvad, J.C.; Nybo, J.L.; Theobald, S.; Kildgaard, S.; Petersen, T.I.; Kuo, A.; Sato, A.; Lyhne, E.K.; Kogle, M.E.; Wiebenga, A.; Kun, R.S.; Lubbers, R.J.M.; Mäkelä, M.R.; Barry, K.; Chovatia, M.; Clum, A.; Daum, C.; Haridas, S.; He, G.; LaButti, K.; Lipzen, A.; Mondo, S.; Pangilinan, J.; Riley, R.; Salamov, A.; Simmons, B.A.; Magnuson, J.K.; Henrissat, B.; Mortensen,…	32107379	Aspergillus_novoparasiticus	aspergillus_novoparasiticus_cbs_126849	negative
Aspergillus ochraceoroseus	Ascomycota	Eurotiomycetes	Eurotiales	Aspergillaceae	Ensembl/Fungi	GCA_000986665.1	02/07/2019	Moore, G.G.; Mack, B.M.; Beltz, S.B. Draft Genome Sequences of Two Closely Related Aflatoxigenic Aspergillus Species Obtained from the Ivory Coast. 2015, Genome Biol Evol 8(3):729-32	26637470	Aspergillus_ochraceoroseus	aspergillus_ochraceoroseus_gca_000986665	negative
Aspergillus oryzae RIB40	Ascomycota	Eurotiomycetes	Eurotiales	Aspergillaceae	NCBI/RefSeq	GCF_000184455.1	01/06/2019	Arnaud, M.B.; Cerqueira, G.C.; Inglis, D.O.; Skrzypek, M.S.; Binkley, J.; Chibucos, M.C.; Crabtree, J.; Howarth, C.; Orvis, J.; Shah, P.; Wymore, F.; Binkley, G.; Miyasato, S.R.; Simison, M.; Sherlock, G.; Wortman, J.R. The Aspergillus Genome Database (AspGD): recent developments in comprehensive multispecies curation, comparative genomics and community resources. 2012, Nucleic Acids Res 40(None)…	22080559	Aspergillus_oryzae_RIB40	Aspergillus_oryzae	negative
Aspergillus parasiticus	Ascomycota	Eurotiomycetes	Eurotiales	Aspergillaceae	JGI/Mycocosm	Asppar1	20/04/2021	Kjærbølling, I.; Vesth, T.; Frisvad, J.C.; Nybo, J.L.; Theobald, S.; Kildgaard, S.; Petersen, T.I.; Kuo, A.; Sato, A.; Lyhne, E.K.; Kogle, M.E.; Wiebenga, A.; Kun, R.S.; Lubbers, R.J.M.; Mäkelä, M.R.; Barry, K.; Chovatia, M.; Clum, A.; Daum, C.; Haridas, S.; He, G.; LaButti, K.; Lipzen, A.; Mondo, S.; Pangilinan, J.; Riley, R.; Salamov, A.; Simmons, B.A.; Magnuson, J.K.; Henrissat, B.; Mortensen,…	32107379	Aspergillus_parasiticus	aspergillus_parasiticus_cbs_117618	negative
Aspergillus piperis CBS 112811	Ascomycota	Eurotiomycetes	Eurotiales	Aspergillaceae	Ensembl/Fungi	GCA_003184755.1	02/07/2019	Vesth, T.C.; Nybo, J.L.; Theobald, S.; Frisvad, J.C.; Larsen, T.O.; Nielsen, K.F.; Hoof, J.B.; Brandl, J.; Salamov, A.; Riley, R.; Gladden, J.M.; Phatale, P.; Nielsen, M.T.; Lyhne, E.K.; Kogle, M.E.; Strasser, K.; McDonnell, E.; Barry, K.; Clum, A.; Chen, C.; LaButti, K.; Haridas, S.; Nolan, M.; Sandor, L.; Kuo, A.; Lipzen, A.; Hainaut, M.; Drula, E.; Tsang, A.; Magnuson, J.K.; Henrissat, B.; Wie…	30349117	Aspergillus_piperis_CBS_112811	aspergillus_piperis_cbs_112811_gca_003184755	negative
Aspergillus pseudocaelatus	Ascomycota	Eurotiomycetes	Eurotiales	Aspergillaceae	JGI/Mycocosm	Asppsec1	20/04/2021	Kjærbølling, I.; Vesth, T.; Frisvad, J.C.; Nybo, J.L.; Theobald, S.; Kildgaard, S.; Petersen, T.I.; Kuo, A.; Sato, A.; Lyhne, E.K.; Kogle, M.E.; Wiebenga, A.; Kun, R.S.; Lubbers, R.J.M.; Mäkelä, M.R.; Barry, K.; Chovatia, M.; Clum, A.; Daum, C.; Haridas, S.; He, G.; LaButti, K.; Lipzen, A.; Mondo, S.; Pangilinan, J.; Riley, R.; Salamov, A.; Simmons, B.A.; Magnuson, J.K.; Henrissat, B.; Mortensen,…	32107379	Aspergillus_pseudocaelatus	aspergillus_pseudocaelatus_cbs_117616	negative
Aspergillus pseudonomiae	Ascomycota	Eurotiomycetes	Eurotiales	Aspergillaceae	JGI/Mycocosm	Asppsen1	20/04/2021	Kjærbølling, I.; Vesth, T.; Frisvad, J.C.; Nybo, J.L.; Theobald, S.; Kildgaard, S.; Petersen, T.I.; Kuo, A.; Sato, A.; Lyhne, E.K.; Kogle, M.E.; Wiebenga, A.; Kun, R.S.; Lubbers, R.J.M.; Mäkelä, M.R.; Barry, K.; Chovatia, M.; Clum, A.; Daum, C.; Haridas, S.; He, G.; LaButti, K.; Lipzen, A.; Mondo, S.; Pangilinan, J.; Riley, R.; Salamov, A.; Simmons, B.A.; Magnuson, J.K.; Henrissat, B.; Mortensen,…	32107379	Aspergillus_pseudonomiae	aspergillus_pseudonomius_cbs_119388	negative
Aspergillus pseudotamarii	Ascomycota	Eurotiomycetes	Eurotiales	Aspergillaceae	JGI/Mycocosm	Asppset1	20/04/2021	Kjærbølling, I.; Vesth, T.; Frisvad, J.C.; Nybo, J.L.; Theobald, S.; Kildgaard, S.; Petersen, T.I.; Kuo, A.; Sato, A.; Lyhne, E.K.; Kogle, M.E.; Wiebenga, A.; Kun, R.S.; Lubbers, R.J.M.; Mäkelä, M.R.; Barry, K.; Chovatia, M.; Clum, A.; Daum, C.; Haridas, S.; He, G.; LaButti, K.; Lipzen, A.; Mondo, S.; Pangilinan, J.; Riley, R.; Salamov, A.; Simmons, B.A.; Magnuson, J.K.; Henrissat, B.; Mortensen,…	32107379	Aspergillus_pseudotamarii	aspergillus_pseudotamarii_cbs_117625	negative
Aspergillus rambellii	Ascomycota	Eurotiomycetes	Eurotiales	Aspergillaceae	Ensembl/Fungi	GCA_000986645.1	02/07/2019	Moore, G.G.; Mack, B.M.; Beltz, S.B. Draft Genome Sequences of Two Closely Related Aflatoxigenic Aspergillus Species Obtained from the Ivory Coast. 2015, Genome Biol Evol 8(3):729-32	26637470	Aspergillus_rambellii	aspergillus_rambellii_gca_000986645	negative
Aspergillus ruber CBS 135680	Ascomycota	Eurotiomycetes	Eurotiales	Aspergillaceae	Ensembl/Fungi	GCA_000600275.1	02/07/2019	Kis-Papo, T.; Weig, A.R.; Riley, R.; Peršoh, D.; Salamov, A.; Sun, H.; Lipzen, A.; Wasser, S.P.; Rambold, G.; Grigoriev, I.V.; Nevo, E. Genomic adaptations of the halophilic Dead Sea filamentous fungus Eurotium rubrum. 2014, Nat Commun 5(None):3745	24811710	Aspergillus_ruber_CBS_135680	aspergillus_ruber_cbs_135680_gca_000600275	negative
Aspergillus saccharolyticus JOP 1030-1	Ascomycota	Eurotiomycetes	Eurotiales	Aspergillaceae	Ensembl/Fungi	GCA_003184585.1	02/07/2019	Vesth, T.C.; Nybo, J.L.; Theobald, S.; Frisvad, J.C.; Larsen, T.O.; Nielsen, K.F.; Hoof, J.B.; Brandl, J.; Salamov, A.; Riley, R.; Gladden, J.M.; Phatale, P.; Nielsen, M.T.; Lyhne, E.K.; Kogle, M.E.; Strasser, K.; McDonnell, E.; Barry, K.; Clum, A.; Chen, C.; LaButti, K.; Haridas, S.; Nolan, M.; Sandor, L.; Kuo, A.; Lipzen, A.; Hainaut, M.; Drula, E.; Tsang, A.; Magnuson, J.K.; Henrissat, B.; Wie…	30349117	Aspergillus_saccharolyticus_JOP_1030-1	aspergillus_saccharolyticus_jop_1030_1_gca_003184585	negative
Aspergillus sclerotiicarbonarius CBS 121057	Ascomycota	Eurotiomycetes	Eurotiales	Aspergillaceae	Ensembl/Fungi	GCA_003184635.1	02/07/2019	Vesth, T.C.; Nybo, J.L.; Theobald, S.; Frisvad, J.C.; Larsen, T.O.; Nielsen, K.F.; Hoof, J.B.; Brandl, J.; Salamov, A.; Riley, R.; Gladden, J.M.; Phatale, P.; Nielsen, M.T.; Lyhne, E.K.; Kogle, M.E.; Strasser, K.; McDonnell, E.; Barry, K.; Clum, A.; Chen, C.; LaButti, K.; Haridas, S.; Nolan, M.; Sandor, L.; Kuo, A.; Lipzen, A.; Hainaut, M.; Drula, E.; Tsang, A.; Magnuson, J.K.; Henrissat, B.; Wie…	30349117	Aspergillus_sclerotiicarbonarius_CBS_121057	aspergillus_sclerotiicarbonarius_cbs_121057_gca_003184635	negative
Aspergillus sclerotioniger CBS 115572	Ascomycota	Eurotiomycetes	Eurotiales	Aspergillaceae	Ensembl/Fungi	GCA_003184525.1	02/07/2019	Vesth, T.C.; Nybo, J.L.; Theobald, S.; Frisvad, J.C.; Larsen, T.O.; Nielsen, K.F.; Hoof, J.B.; Brandl, J.; Salamov, A.; Riley, R.; Gladden, J.M.; Phatale, P.; Nielsen, M.T.; Lyhne, E.K.; Kogle, M.E.; Strasser, K.; McDonnell, E.; Barry, K.; Clum, A.; Chen, C.; LaButti, K.; Haridas, S.; Nolan, M.; Sandor, L.; Kuo, A.; Lipzen, A.; Hainaut, M.; Drula, E.; Tsang, A.; Magnuson, J.K.; Henrissat, B.; Wie…	30349117	Aspergillus_sclerotioniger_CBS_115572	aspergillus_sclerotioniger_cbs_115572_gca_003184525	negative
Aspergillus sergii	Ascomycota	Eurotiomycetes	Eurotiales	Aspergillaceae	JGI/Mycocosm	Aspser1	20/04/2021	Kjærbølling, I.; Vesth, T.; Frisvad, J.C.; Nybo, J.L.; Theobald, S.; Kildgaard, S.; Petersen, T.I.; Kuo, A.; Sato, A.; Lyhne, E.K.; Kogle, M.E.; Wiebenga, A.; Kun, R.S.; Lubbers, R.J.M.; Mäkelä, M.R.; Barry, K.; Chovatia, M.; Clum, A.; Daum, C.; Haridas, S.; He, G.; LaButti, K.; Lipzen, A.; Mondo, S.; Pangilinan, J.; Riley, R.; Salamov, A.; Simmons, B.A.; Magnuson, J.K.; Henrissat, B.; Mortensen,…	32107379	Aspergillus_sergii	aspergillus_sergii_cbs_130017	negative
Aspergillus steynii IBT 23096	Ascomycota	Eurotiomycetes	Eurotiales	Aspergillaceae	Ensembl/Fungi	GCA_002849105.1	02/07/2019	Kjærbølling, I.; Vesth, T.C.; Frisvad, J.C.; Nybo, J.L.; Theobald, S.; Kuo, A.; Bowyer, P.; Matsuda, Y.; Mondo, S.; Lyhne, E.K.; Kogle, M.E.; Clum, A.; Lipzen, A.; Salamov, A.; Ngan, C.Y.; Daum, C.; Chiniquy, J.; Barry, K.; LaButti, K.; Haridas, S.; Simmons, B.A.; Magnuson, J.K.; Mortensen, U.H.; Larsen, T.O.; Grigoriev, I.V.; Baker, S.E.; Andersen, M.R. Linking secondary metabolites to gene clus…	29317534	Aspergillus_steynii_IBT_23096	aspergillus_steynii_ibt_23096_gca_002849105	negative
Aspergillus sydowii CBS 593.65	Ascomycota	Eurotiomycetes	Eurotiales	Aspergillaceae	Ensembl/Fungi	GCA_001890705.1	02/07/2019	de Vries, R.P.; Riley, R.; Wiebenga, A.; Aguilar-Osorio, G.; Amillis, S.; Uchima, C.A.; Anderluh, G.; Asadollahi, M.; Askin, M.; Barry, K.; Battaglia, E.; Bayram, Ö.; Benocci, T.; Braus-Stromeyer, S.A.; Caldana, C.; Cánovas, D.; Cerqueira, G.C.; Chen, F.; Chen, W.; Choi, C.; Clum, A.; Dos Santos, R.A.; Damásio, A.R.; Diallinas, G.; Emri, T.; Fekete, E.; Flipphi, M.; Freyberg, S.; Gallo, A.; Gourn…	28196534	Aspergillus_sydowii_CBS_593.65	aspergillus_sydowii_cbs_593_65_gca_001890705	negative
Aspergillus taichungensis	Ascomycota	Eurotiomycetes	Eurotiales	Aspergillaceae	Ensembl/Fungi	GCA_002850765.1	02/07/2019	Kjærbølling, I.; Vesth, T.C.; Frisvad, J.C.; Nybo, J.L.; Theobald, S.; Kuo, A.; Bowyer, P.; Matsuda, Y.; Mondo, S.; Lyhne, E.K.; Kogle, M.E.; Clum, A.; Lipzen, A.; Salamov, A.; Ngan, C.Y.; Daum, C.; Chiniquy, J.; Barry, K.; LaButti, K.; Haridas, S.; Simmons, B.A.; Magnuson, J.K.; Mortensen, U.H.; Larsen, T.O.; Grigoriev, I.V.; Baker, S.E.; Andersen, M.R. Linking secondary metabolites to gene clus…	29317534	Aspergillus_taichungensis	aspergillus_taichungensis_gca_002850765	negative
Aspergillus tamarii	Ascomycota	Eurotiomycetes	Eurotiales	Aspergillaceae	JGI/Mycocosm	Asptam1	20/04/2021	Kjærbølling, I.; Vesth, T.; Frisvad, J.C.; Nybo, J.L.; Theobald, S.; Kildgaard, S.; Petersen, T.I.; Kuo, A.; Sato, A.; Lyhne, E.K.; Kogle, M.E.; Wiebenga, A.; Kun, R.S.; Lubbers, R.J.M.; Mäkelä, M.R.; Barry, K.; Chovatia, M.; Clum, A.; Daum, C.; Haridas, S.; He, G.; LaButti, K.; Lipzen, A.; Mondo, S.; Pangilinan, J.; Riley, R.; Salamov, A.; Simmons, B.A.; Magnuson, J.K.; Henrissat, B.; Mortensen,…	32107379	Aspergillus_tamarii	aspergillus_tamarii_cbs_117626	negative
Aspergillus terreus NIH2624	Ascomycota	Eurotiomycetes	Eurotiales	Aspergillaceae	Ensembl/Fungi	GCA_000149615.1	02/07/2019	Arnaud, M.B.; Cerqueira, G.C.; Inglis, D.O.; Skrzypek, M.S.; Binkley, J.; Chibucos, M.C.; Crabtree, J.; Howarth, C.; Orvis, J.; Shah, P.; Wymore, F.; Binkley, G.; Miyasato, S.R.; Simison, M.; Sherlock, G.; Wortman, J.R. The Aspergillus Genome Database (AspGD): recent developments in comprehensive multispecies curation, comparative genomics and community resources. 2012, Nucleic Acids Res 40(None)…	22080559	Aspergillus_terreus_NIH2624	aspergillus_terreus	negative
Aspergillus thermomutatus	Ascomycota	Eurotiomycetes	Eurotiales	Aspergillaceae	NCBI/RefSeq	GCF_002237265.1	01/07/2019	Parent-Michaud, M.; Dufresne, P.J.; Fournier, É.; Martineau, C.; Moreira, S.; Perkins, V.; de Repentigny, L.; Dufresne, S.F. Draft Genome Sequence of Azole-Resistant Aspergillus thermomutatus (Neosartorya pseudofischeri) Strain HMR-AF-39, Isolated from a Human Nasal Septum Abscess Aspirate. 2019, Microbiol Resour Announc 8(1):None	30637395	Aspergillus_thermomutatus	Aspergillus_thermomutatus	negative
Aspergillus transmontanensis	Ascomycota	Eurotiomycetes	Eurotiales	Aspergillaceae	JGI/Mycocosm	Asptra1	20/04/2021	Kjærbølling, I.; Vesth, T.; Frisvad, J.C.; Nybo, J.L.; Theobald, S.; Kildgaard, S.; Petersen, T.I.; Kuo, A.; Sato, A.; Lyhne, E.K.; Kogle, M.E.; Wiebenga, A.; Kun, R.S.; Lubbers, R.J.M.; Mäkelä, M.R.; Barry, K.; Chovatia, M.; Clum, A.; Daum, C.; Haridas, S.; He, G.; LaButti, K.; Lipzen, A.; Mondo, S.; Pangilinan, J.; Riley, R.; Salamov, A.; Simmons, B.A.; Magnuson, J.K.; Henrissat, B.; Mortensen,…	32107379	Aspergillus_transmontanensis	aspergillus_transmontanensis_cbs_130015	negative
Aspergillus tubingensis CBS 134.48	Ascomycota	Eurotiomycetes	Eurotiales	Aspergillaceae	Ensembl/Fungi	GCA_001890745.1	02/07/2019	de Vries, R.P.; Riley, R.; Wiebenga, A.; Aguilar-Osorio, G.; Amillis, S.; Uchima, C.A.; Anderluh, G.; Asadollahi, M.; Askin, M.; Barry, K.; Battaglia, E.; Bayram, Ö.; Benocci, T.; Braus-Stromeyer, S.A.; Caldana, C.; Cánovas, D.; Cerqueira, G.C.; Chen, F.; Chen, W.; Choi, C.; Clum, A.; Dos Santos, R.A.; Damásio, A.R.; Diallinas, G.; Emri, T.; Fekete, E.; Flipphi, M.; Freyberg, S.; Gallo, A.; Gourn…	28196534	Aspergillus_tubingensis_CBS_134.48	aspergillus_tubingensis_cbs_134_48_gca_001890745	negative
Aspergillus turcosus	Ascomycota	Eurotiomycetes	Eurotiales	Aspergillaceae	Ensembl/Fungi	GCA_002234965.1	02/07/2019	Parent-Michaud, M.; Dufresne, P.J.; Fournier, É.; Martineau, C.; Moreira, S.; Perkins, V.; de Repentigny, L.; Dufresne, S.F. Draft Genome Sequences of Azole-Resistant and Azole-Susceptible Aspergillus turcosus Clinical Isolates Recovered from Bronchoalveolar Lavage Fluid Samples. 2019, Microbiol Resour Announc 8(1):None	30637396	Aspergillus_turcosus	aspergillus_turcosus_gca_002234965	negative
Aspergillus udagawae	Ascomycota	Eurotiomycetes	Eurotiales	Aspergillaceae	Ensembl/Fungi	GCA_001078395.1	02/07/2019	Kusuya, Y.; Takahashi-Nakaguchi, A.; Takahashi, H.; Yaguchi, T. Draft Genome Sequence of the Pathogenic Filamentous Fungus Aspergillus udagawae Strain IFM 46973T. 2015, Genome Announc 3(4):None	26251487	Aspergillus_udagawae	aspergillus_udagawae_gca_001078395	negative
Aspergillus ustus	Ascomycota	Eurotiomycetes	Eurotiales	Aspergillaceae	NCBI/GenBank	GCA_000812125.1	17/05/2021	Pi, B.; Yu, D.; Dai, F.; Song, X.; Zhu, C.; Li, H.; Yu, Y. A genomics based discovery of secondary metabolite biosynthetic gene clusters in Aspergillus ustus. 2015, PLoS One 10(2):e0116089	25706180	Aspergillus_ustus	Aspergillus_ustus	negative
Aspergillus uvarum CBS 121591	Ascomycota	Eurotiomycetes	Eurotiales	Aspergillaceae	Ensembl/Fungi	GCA_003184745.1	02/07/2019	Vesth, T.C.; Nybo, J.L.; Theobald, S.; Frisvad, J.C.; Larsen, T.O.; Nielsen, K.F.; Hoof, J.B.; Brandl, J.; Salamov, A.; Riley, R.; Gladden, J.M.; Phatale, P.; Nielsen, M.T.; Lyhne, E.K.; Kogle, M.E.; Strasser, K.; McDonnell, E.; Barry, K.; Clum, A.; Chen, C.; LaButti, K.; Haridas, S.; Nolan, M.; Sandor, L.; Kuo, A.; Lipzen, A.; Hainaut, M.; Drula, E.; Tsang, A.; Magnuson, J.K.; Henrissat, B.; Wie…	30349117	Aspergillus_uvarum_CBS_121591	aspergillus_uvarum_cbs_121591_gca_003184745	negative
Aspergillus vadensis CBS 113365	Ascomycota	Eurotiomycetes	Eurotiales	Aspergillaceae	Ensembl/Fungi	GCA_003184925.1	02/07/2019	Vesth, T.C.; Nybo, J.L.; Theobald, S.; Frisvad, J.C.; Larsen, T.O.; Nielsen, K.F.; Hoof, J.B.; Brandl, J.; Salamov, A.; Riley, R.; Gladden, J.M.; Phatale, P.; Nielsen, M.T.; Lyhne, E.K.; Kogle, M.E.; Strasser, K.; McDonnell, E.; Barry, K.; Clum, A.; Chen, C.; LaButti, K.; Haridas, S.; Nolan, M.; Sandor, L.; Kuo, A.; Lipzen, A.; Hainaut, M.; Drula, E.; Tsang, A.; Magnuson, J.K.; Henrissat, B.; Wie…	30349117	Aspergillus_vadensis_CBS_113365	aspergillus_vadensis_cbs_113365_gca_003184925	negative
Aspergillus versicolor CBS 583.65	Ascomycota	Eurotiomycetes	Eurotiales	Aspergillaceae	Ensembl/Fungi	GCA_001890125.1	02/07/2019	de Vries, R.P.; Riley, R.; Wiebenga, A.; Aguilar-Osorio, G.; Amillis, S.; Uchima, C.A.; Anderluh, G.; Asadollahi, M.; Askin, M.; Barry, K.; Battaglia, E.; Bayram, Ö.; Benocci, T.; Braus-Stromeyer, S.A.; Caldana, C.; Cánovas, D.; Cerqueira, G.C.; Chen, F.; Chen, W.; Choi, C.; Clum, A.; Dos Santos, R.A.; Damásio, A.R.; Diallinas, G.; Emri, T.; Fekete, E.; Flipphi, M.; Freyberg, S.; Gallo, A.; Gourn…	28196534	Aspergillus_versicolor_CBS_583.65	aspergillus_versicolor_cbs_583_65_gca_001890125	negative
Aspergillus violaceofuscus CBS 115571	Ascomycota	Eurotiomycetes	Eurotiales	Aspergillaceae	Ensembl/Fungi	GCA_003184705.1	02/07/2019	Vesth, T.C.; Nybo, J.L.; Theobald, S.; Frisvad, J.C.; Larsen, T.O.; Nielsen, K.F.; Hoof, J.B.; Brandl, J.; Salamov, A.; Riley, R.; Gladden, J.M.; Phatale, P.; Nielsen, M.T.; Lyhne, E.K.; Kogle, M.E.; Strasser, K.; McDonnell, E.; Barry, K.; Clum, A.; Chen, C.; LaButti, K.; Haridas, S.; Nolan, M.; Sandor, L.; Kuo, A.; Lipzen, A.; Hainaut, M.; Drula, E.; Tsang, A.; Magnuson, J.K.; Henrissat, B.; Wie…	30349117	Aspergillus_violaceofuscus_CBS_115571	aspergillus_violaceofuscus_cbs_115571_gca_003184705	negative
Aspergillus welwitschiae	Ascomycota	Eurotiomycetes	Eurotiales	Aspergillaceae	NCBI/RefSeq	GCF_003344945.1	01/07/2019	Vesth, T.C.; Nybo, J.L.; Theobald, S.; Frisvad, J.C.; Larsen, T.O.; Nielsen, K.F.; Hoof, J.B.; Brandl, J.; Salamov, A.; Riley, R.; Gladden, J.M.; Phatale, P.; Nielsen, M.T.; Lyhne, E.K.; Kogle, M.E.; Strasser, K.; McDonnell, E.; Barry, K.; Clum, A.; Chen, C.; LaButti, K.; Haridas, S.; Nolan, M.; Sandor, L.; Kuo, A.; Lipzen, A.; Hainaut, M.; Drula, E.; Tsang, A.; Magnuson, J.K.; Henrissat, B.; Wie…	30349117	Aspergillus_welwitschiae	Aspergillus_welwitschiae	negative
Aspergillus wentii DTO 134E9	Ascomycota	Eurotiomycetes	Eurotiales	Aspergillaceae	Ensembl/Fungi	GCA_001890725.1	02/07/2019	de Vries, R.P.; Riley, R.; Wiebenga, A.; Aguilar-Osorio, G.; Amillis, S.; Uchima, C.A.; Anderluh, G.; Asadollahi, M.; Askin, M.; Barry, K.; Battaglia, E.; Bayram, Ö.; Benocci, T.; Braus-Stromeyer, S.A.; Caldana, C.; Cánovas, D.; Cerqueira, G.C.; Chen, F.; Chen, W.; Choi, C.; Clum, A.; Dos Santos, R.A.; Damásio, A.R.; Diallinas, G.; Emri, T.; Fekete, E.; Flipphi, M.; Freyberg, S.; Gallo, A.; Gourn…	28196534	Aspergillus_wentii_DTO_134E9	aspergillus_wentii_dto_134e9_gca_001890725	negative
Aulographum hederae	Ascomycota	Dothideomycetes	Aulographales	Aulographaceae	JGI/Mycocosm	Aulhe2	20/04/2021	Haridas, S.; Albert, R.; Binder, M.; Bloem, J.; LaButti, K.; Salamov, A.; Andreopoulos, B.; Baker, S.E.; Barry, K.; Bills, G.; Bluhm, B.H.; Cannon, C.; Castanera, R.; Culley, D.E.; Daum, C.; Ezra, D.; González, J.B.; Henrissat, B.; Kuo, A.; Liang, C.; Lipzen, A.; Lutzoni, F.; Magnuson, J.; Mondo, S.J.; Nolan, M.; Ohm, R.A.; Pangilinan, J.; Park, H.J.; Ramírez, L.; Alfaro, M.; Sun, H.; Tritt, A.; …	32206138	Aulographum_hederae	aulographum_hederae	negative
Aureobasidium melanogenum CBS 110374	Ascomycota	Dothideomycetes	Dothideales	Saccotheciaceae	Ensembl/Fungi	GCA_000721775.1	02/07/2019	Gostinčar, C.; Ohm, R.A.; Kogej, T.; Sonjak, S.; Turk, M.; Zajc, J.; Zalar, P.; Grube, M.; Sun, H.; Han, J.; Sharma, A.; Chiniquy, J.; Ngan, C.Y.; Lipzen, A.; Barry, K.; Grigoriev, I.V.; Gunde-Cimerman, N. Genome sequencing of four Aureobasidium pullulans varieties: biotechnological potential, stress tolerance, and description of new species. 2014, BMC Genomics 15(None):549	24984952	Aureobasidium_melanogenum_CBS_110374	aureobasidium_melanogenum_cbs_110374_gca_000721775	negative
Aureobasidium namibiae CBS 147.97	Ascomycota	Dothideomycetes	Dothideales	Saccotheciaceae	Ensembl/Fungi	GCA_000721765.1	02/07/2019	Gostinčar, C.; Ohm, R.A.; Kogej, T.; Sonjak, S.; Turk, M.; Zajc, J.; Zalar, P.; Grube, M.; Sun, H.; Han, J.; Sharma, A.; Chiniquy, J.; Ngan, C.Y.; Lipzen, A.; Barry, K.; Grigoriev, I.V.; Gunde-Cimerman, N. Genome sequencing of four Aureobasidium pullulans varieties: biotechnological potential, stress tolerance, and description of new species. 2014, BMC Genomics 15(None):549	24984952	Aureobasidium_namibiae_CBS_147.97	aureobasidium_namibiae_cbs_147_97_gca_000721765	negative
Aureobasidium pullulans EXF-150	Ascomycota	Dothideomycetes	Dothideales	Saccotheciaceae	Ensembl/Fungi	GCA_000721785.1	02/07/2019	Gostinčar, C.; Ohm, R.A.; Kogej, T.; Sonjak, S.; Turk, M.; Zajc, J.; Zalar, P.; Grube, M.; Sun, H.; Han, J.; Sharma, A.; Chiniquy, J.; Ngan, C.Y.; Lipzen, A.; Barry, K.; Grigoriev, I.V.; Gunde-Cimerman, N. Genome sequencing of four Aureobasidium pullulans varieties: biotechnological potential, stress tolerance, and description of new species. 2014, BMC Genomics 15(None):549	24984952	Aureobasidium_pullulans_EXF-150	aureobasidium_pullulans_exf_150_gca_000721785	negative
Aureobasidium subglaciale EXF-2481	Ascomycota	Dothideomycetes	Dothideales	Saccotheciaceae	Ensembl/Fungi	GCA_000721755.1	02/07/2019	Gostinčar, C.; Ohm, R.A.; Kogej, T.; Sonjak, S.; Turk, M.; Zajc, J.; Zalar, P.; Grube, M.; Sun, H.; Han, J.; Sharma, A.; Chiniquy, J.; Ngan, C.Y.; Lipzen, A.; Barry, K.; Grigoriev, I.V.; Gunde-Cimerman, N. Genome sequencing of four Aureobasidium pullulans varieties: biotechnological potential, stress tolerance, and description of new species. 2014, BMC Genomics 15(None):549	24984952	Aureobasidium_subglaciale_EXF-2481	aureobasidium_subglaciale_exf_2481_gca_000721755	negative
Auricularia subglabra TFB-10046 SS5	Basidiomycota	Agaricomycetes	Auriculariales	Auriculariaceae	NCBI/RefSeq	GCF_000265015.1	01/06/2019	Floudas, D.; Binder, M.; Riley, R.; Barry, K.; Blanchette, R.A.; Henrissat, B.; Martínez, A.T.; Otillar, R.; Spatafora, J.W.; Yadav, J.S.; Aerts, A.; Benoit, I.; Boyd, A.; Carlson, A.; Copeland, A.; Coutinho, P.M.; de Vries, R.P.; Ferreira, P.; Findley, K.; Foster, B.; Gaskell, J.; Glotzer, D.; Górecki, P.; Heitman, J.; Hesse, C.; Hori, C.; Igarashi, K.; Jurgens, J.A.; Kallen, N.; Kersten, P.; Ko…	22745431	Auricularia_subglabra_TFB-10046_SS5	Auricularia_subglabra	negative
Auriculariopsis ampla	Basidiomycota	Agaricomycetes	Agaricales	Schizophyllaceae	JGI/Mycocosm	Auramp1	08/10/2019	Almási, É.; Sahu, N.; Krizsán, K.; Bálint, B.; Kovács, G.M.; Kiss, B.; Cseklye, J.; Drula, E.; Henrissat, B.; Nagy, I.; Chovatia, M.; Adam, C.; LaButti, K.; Lipzen, A.; Riley, R.; Grigoriev, I.V.; Nagy, L.G. Comparative genomics reveals unique wood-decay strategies and fruiting body development in the Schizophyllaceae. 2019, New Phytol 224(2):902-915	31257601	Auriculariopsis_ampla	auriculariopsis_ampla_nl-1724	negative
Babjeviella inositovora NRRL Y-12698	Ascomycota	Saccharomycetes	Saccharomycetales	Debaryomycetaceae	Ensembl/Fungi	GCA_001661335.1	02/07/2019	Riley, R.; Haridas, S.; Wolfe, K.H.; Lopes, M.R.; Hittinger, C.T.; Göker, M.; Salamov, A.A.; Wisecaver, J.H.; Long, T.M.; Calvey, C.H.; Aerts, A.L.; Barry, K.W.; Choi, C.; Clum, A.; Coughlan, A.Y.; Deshpande, S.; Douglass, A.P.; Hanson, S.J.; Klenk, H.P.; LaButti, K.M.; Lapidus, A.; Lindquist, E.A.; Lipzen, A.M.; Meier-Kolthoff, J.P.; Ohm, R.A.; Otillar, R.P.; Pangilinan, J.L.; Peng, Y.; Rokas, A…	27535936	Babjeviella_inositovora_NRRL_Y-12698	babjeviella_inositovora_nrrl_y_12698_gca_001661335	negative
Basidiobolus meristosporus CBS 931.73	Zoopagomycota	Basidiobolomycetes	Basidiobolales	Basidiobolaceae	Ensembl/Fungi	GCA_002104905.1	02/07/2019	Mondo, S.J.; Dannebaum, R.O.; Kuo, R.C.; Louie, K.B.; Bewick, A.J.; LaButti, K.; Haridas, S.; Kuo, A.; Salamov, A.; Ahrendt, S.R.; Lau, R.; Bowen, B.P.; Lipzen, A.; Sullivan, W.; Andreopoulos, B.B.; Clum, A.; Lindquist, E.; Daum, C.; Northen, T.R.; Kunde-Ramamoorthy, G.; Schmitz, R.J.; Gryganskyi, A.; Culley, D.; Magnuson, J.; James, T.Y.; O'Malley, M.A.; Stajich, J.E.; Spatafora, J.W.; Visel, A.…	28481340	Basidiobolus_meristosporus_CBS_931.73	basidiobolus_meristosporus_cbs_931_73_gca_002104905	negative
Batrachochytrium dendrobatidis JAM81	Chytridiomycota	Chytridiomycetes	Rhizophydiales		NCBI/RefSeq	GCF_000203795.1	01/06/2019	Kuo A.; Salamov A.; Schmutz J.; Lucas S.; Pitluck S., Rosenblum E., Stajich J., Eisen M., Grigoriev I.V. The draft genome of Batrachochytrium dendrobatidis. 2009, US DOE Joint Genome Institute.	*	Batrachochytrium_dendrobatidis_JAM81	Batrachochytrium_dendrobatidis	negative
Batrachochytrium salamandrivorans	Chytridiomycota	Chytridiomycetes	Rhizophydiales		Ensembl/Fungi	GCA_002006685.1	02/07/2019	Farrer, R.A.; Martel, A.; Verbrugghe, E.; Abouelleil, A.; Ducatelle, R.; Longcore, J.E.; James, T.Y.; Pasmans, F.; Fisher, M.C.; Cuomo, C.A. Genomic innovations linked to infection strategies across emerging pathogenic chytrid fungi. 2017, Nat Commun 8(None):14742	28322291	Batrachochytrium_salamandrivorans	batrachochytrium_salamandrivorans_gca_002006685	negative
Baudoinia panamericana UAMH 10762	Ascomycota	Dothideomycetes	Capnodiales	Teratosphaeriaceae	Ensembl/Fungi	GCA_000338955.1	02/07/2019	Ohm, R.A.; Feau, N.; Henrissat, B.; Schoch, C.L.; Horwitz, B.A.; Barry, K.W.; Condon, B.J.; Copeland, A.C.; Dhillon, B.; Glaser, F.; Hesse, C.N.; Kosti, I.; LaButti, K.; Lindquist, E.A.; Lucas, S.; Salamov, A.A.; Bradshaw, R.E.; Ciuffetti, L.; Hamelin, R.C.; Kema, G.H.; Lawrence, C.; Scott, J.A.; Spatafora, J.W.; Turgeon, B.G.; de Wit, P.J.; Zhong, S.; Goodwin, S.B.; Grigoriev, I.V. Diverse lifes…	23236275	Baudoinia_panamericana_UAMH_10762	baudoinia_panamericana_uamh_10762_gca_000338955	negative
Beauveria bassiana ARSEF 2860	Ascomycota	Sordariomycetes	Hypocreales	Cordycipitaceae	NCBI/RefSeq	GCF_000280675.1	01/06/2019	Xiao, G.; Ying, S.H.; Zheng, P.; Wang, Z.L.; Zhang, S.; Xie, X.Q.; Shang, Y.; St Leger, R.J.; Zhao, G.P.; Wang, C.; Feng, M.G. Genomic perspectives on the evolution of fungal entomopathogenicity in Beauveria bassiana. 2012, Sci Rep 2(None):483	22761991	Beauveria_bassiana_ARSEF_2860	Beauveria_bassiana	negative
Beauveria brongniartii RCEF 3172	Ascomycota	Sordariomycetes	Hypocreales	Cordycipitaceae	Ensembl/Fungi	GCA_001636735.1	02/07/2019	Shang, Y.; Xiao, G.; Zheng, P.; Cen, K.; Zhan, S.; Wang, C. Divergent and Convergent Evolution of Fungal Pathogenicity. 2016, Genome Biol Evol 8(5):1374-87	27071652	Beauveria_brongniartii_RCEF_3172	cordyceps_brongniartii_rcef_3172_gca_001636735	negative
Bifiguratus adelaidae	Mucoromycota	Endogonomycetes	Endogonales		Ensembl/Fungi	GCA_002261195.1	02/07/2019	Torres-Cruz, T.J.; Billingsley Tobias, T.L.; Almatruk, M.; Hesse, C.N.; Kuske, C.R.; Desirò, A.; Benucci, G.M.N.; Bonito, G.; Stajich, J.E.; Dunlap, C.; Arnold, A.E.; Porras-Alfaro, A. Bifiguratus adelaidae, gen. et sp. nov., a new member of Mucoromycotina in endophytic and soil-dwelling habitats. None, Mycologia 109(3):363-378	28876195	Bifiguratus_adelaidae	bifiguratus_adelaidae_gca_002261195	negative
Bimuria novae-zelandiae CBS 107.79	Ascomycota	Dothideomycetes	Pleosporales	Didymosphaeriaceae	JGI/Mycocosm	Bimnz1	20/04/2021	Haridas, S.; Albert, R.; Binder, M.; Bloem, J.; LaButti, K.; Salamov, A.; Andreopoulos, B.; Baker, S.E.; Barry, K.; Bills, G.; Bluhm, B.H.; Cannon, C.; Castanera, R.; Culley, D.E.; Daum, C.; Ezra, D.; González, J.B.; Henrissat, B.; Kuo, A.; Liang, C.; Lipzen, A.; Lutzoni, F.; Magnuson, J.; Mondo, S.J.; Nolan, M.; Ohm, R.A.; Pangilinan, J.; Park, H.J.; Ramírez, L.; Alfaro, M.; Sun, H.; Tritt, A.; …	32206138	Bimuria_novae-zelandiae_CBS_107.79	bimuria_novae-zelandiae_cbs_107.79	negative
Bipolaris maydis ATCC 48331	Ascomycota	Dothideomycetes	Pleosporales	Pleosporaceae	Ensembl/Fungi	GCA_000354255.1	02/07/2019	Ohm, R.A.; Feau, N.; Henrissat, B.; Schoch, C.L.; Horwitz, B.A.; Barry, K.W.; Condon, B.J.; Copeland, A.C.; Dhillon, B.; Glaser, F.; Hesse, C.N.; Kosti, I.; LaButti, K.; Lindquist, E.A.; Lucas, S.; Salamov, A.A.; Bradshaw, R.E.; Ciuffetti, L.; Hamelin, R.C.; Kema, G.H.; Lawrence, C.; Scott, J.A.; Spatafora, J.W.; Turgeon, B.G.; de Wit, P.J.; Zhong, S.; Goodwin, S.B.; Grigoriev, I.V. Diverse lifes…	23236275	Bipolaris_maydis_ATCC_48331	bipolaris_maydis_atcc_48331_gca_000354255	negative
Bipolaris oryzae ATCC 44560	Ascomycota	Dothideomycetes	Pleosporales	Pleosporaceae	Ensembl/Fungi	GCA_000523455.1	02/07/2019	Condon, B.J.; Leng, Y.; Wu, D.; Bushley, K.E.; Ohm, R.A.; Otillar, R.; Martin, J.; Schackwitz, W.; Grimwood, J.; MohdZainudin, N.; Xue, C.; Wang, R.; Manning, V.A.; Dhillon, B.; Tu, Z.J.; Steffenson, B.J.; Salamov, A.; Sun, H.; Lowry, S.; LaButti, K.; Han, J.; Copeland, A.; Lindquist, E.; Barry, K.; Schmutz, J.; Baker, S.E.; Ciuffetti, L.M.; Grigoriev, I.V.; Zhong, S.; Turgeon, B.G. Comparative g…	23357949	Bipolaris_oryzae_ATCC_44560	bipolaris_oryzae_atcc_44560_gca_000523455	negative
Bipolaris sorokiniana ND90Pr	Ascomycota	Dothideomycetes	Pleosporales	Pleosporaceae	Ensembl/Fungi	GCA_000338995.1	02/07/2019	Ohm, R.A.; Feau, N.; Henrissat, B.; Schoch, C.L.; Horwitz, B.A.; Barry, K.W.; Condon, B.J.; Copeland, A.C.; Dhillon, B.; Glaser, F.; Hesse, C.N.; Kosti, I.; LaButti, K.; Lindquist, E.A.; Lucas, S.; Salamov, A.A.; Bradshaw, R.E.; Ciuffetti, L.; Hamelin, R.C.; Kema, G.H.; Lawrence, C.; Scott, J.A.; Spatafora, J.W.; Turgeon, B.G.; de Wit, P.J.; Zhong, S.; Goodwin, S.B.; Grigoriev, I.V. Diverse lifes…	23236275	Bipolaris_sorokiniana_ND90Pr	bipolaris_sorokiniana_nd90pr_gca_000338995	negative
Bipolaris victoriae FI3	Ascomycota	Dothideomycetes	Pleosporales	Pleosporaceae	Ensembl/Fungi	GCA_000527765.1	02/07/2019	Condon, B.J.; Leng, Y.; Wu, D.; Bushley, K.E.; Ohm, R.A.; Otillar, R.; Martin, J.; Schackwitz, W.; Grimwood, J.; MohdZainudin, N.; Xue, C.; Wang, R.; Manning, V.A.; Dhillon, B.; Tu, Z.J.; Steffenson, B.J.; Salamov, A.; Sun, H.; Lowry, S.; LaButti, K.; Han, J.; Copeland, A.; Lindquist, E.; Barry, K.; Schmutz, J.; Baker, S.E.; Ciuffetti, L.M.; Grigoriev, I.V.; Zhong, S.; Turgeon, B.G. Comparative g…	23357949	Bipolaris_victoriae_FI3	bipolaris_victoriae_fi3_gca_000527765	negative
Bipolaris zeicola 26-R-13	Ascomycota	Dothideomycetes	Pleosporales	Pleosporaceae	Ensembl/Fungi	GCA_000523435.1	02/07/2019	Condon, B.J.; Leng, Y.; Wu, D.; Bushley, K.E.; Ohm, R.A.; Otillar, R.; Martin, J.; Schackwitz, W.; Grimwood, J.; MohdZainudin, N.; Xue, C.; Wang, R.; Manning, V.A.; Dhillon, B.; Tu, Z.J.; Steffenson, B.J.; Salamov, A.; Sun, H.; Lowry, S.; LaButti, K.; Han, J.; Copeland, A.; Lindquist, E.; Barry, K.; Schmutz, J.; Baker, S.E.; Ciuffetti, L.M.; Grigoriev, I.V.; Zhong, S.; Turgeon, B.G. Comparative g…	23357949	Bipolaris_zeicola_26-R-13	bipolaris_zeicola_26_r_13_gca_000523435	negative
Bjerkandera adusta	Basidiomycota	Agaricomycetes	Polyporales	Phanerochaetaceae	JGI/Mycocosm	Bjead1_1	01/06/2019	Binder, M.; Justo, A.; Riley, R.; Salamov, A.; Lopez-Giraldez, F.; Sjökvist, E.; Copeland, A.; Foster, B.; Sun, H.; Larsson, E.; Larsson, K.H.; Townsend, J.; Grigoriev, I.V.; Hibbett, D.S. Phylogenetic and phylogenomic overview of the Polyporales. None, Mycologia 105(6):1350-73	23935031	Bjerkandera_adusta	bjerkandera_adusta	negative
Blastobotrys adeninivorans	Ascomycota	Saccharomycetes	Saccharomycetales	Trichomonascaceae	JGI/Mycocosm	Arxad1	01/06/2019	Kunze, G.; Gaillardin, C.; Czernicka, M.; Durrens, P.; Martin, T.; Böer, E.; Gabaldón, T.; Cruz, J.A.; Talla, E.; Marck, C.; Goffeau, A.; Barbe, V.; Baret, P.; Baronian, K.; Beier, S.; Bleykasten, C.; Bode, R.; Casaregola, S.; Despons, L.; Fairhead, C.; Giersberg, M.; Gierski, P.P.; Hähnel, U.; Hartmann, A.; Jankowska, D.; Jubin, C.; Jung, P.; Lafontaine, I.; Leh-Louis, V.; Lemaire, M.; Marcet-Ho…	24834124	Blastobotrys_adeninivorans	blastobotrys_arxula_adeninivorans	negative
Blastomyces dermatitidis ER-3	Ascomycota	Eurotiomycetes	Onygenales	Ajellomycetaceae	JGI/Mycocosm	Blader1	20/04/2021	Muñoz, J.F.; Gauthier, G.M.; Desjardins, C.A.; Gallo, J.E.; Holder, J.; Sullivan, T.D.; Marty, A.J.; Carmen, J.C.; Chen, Z.; Ding, L.; Gujja, S.; Magrini, V.; Misas, E.; Mitreva, M.; Priest, M.; Saif, S.; Whiston, E.A.; Young, S.; Zeng, Q.; Goldman, W.E.; Mardis, E.R.; Taylor, J.W.; McEwen, J.G.; Clay, O.K.; Klein, B.S.; Cuomo, C.A. The Dynamic Genome and Transcriptome of the Human Fungal Pathoge…	26439490	Blastomyces_dermatitidis_ER-3	blastomyces_dermatitidis_er-3	negative
Blastomyces gilchristii SLH14081	Ascomycota	Eurotiomycetes	Onygenales	Ajellomycetaceae	Ensembl/Fungi	GCA_000003855.2	02/07/2019	Muñoz, J.F.; Gauthier, G.M.; Desjardins, C.A.; Gallo, J.E.; Holder, J.; Sullivan, T.D.; Marty, A.J.; Carmen, J.C.; Chen, Z.; Ding, L.; Gujja, S.; Magrini, V.; Misas, E.; Mitreva, M.; Priest, M.; Saif, S.; Whiston, E.A.; Young, S.; Zeng, Q.; Goldman, W.E.; Mardis, E.R.; Taylor, J.W.; McEwen, J.G.; Clay, O.K.; Klein, B.S.; Cuomo, C.A. The Dynamic Genome and Transcriptome of the Human Fungal Pathoge…	26439490	Blastomyces_gilchristii_SLH14081	blastomyces_gilchristii_slh14081_gca_000003855	negative
Blastomyces parvus	Ascomycota	Eurotiomycetes	Onygenales	Ajellomycetaceae	Ensembl/Fungi	GCA_002572885.1	02/07/2019	Muñoz, J.F.; McEwen, J.G.; Clay, O.K.; Cuomo, C.A. Genome analysis reveals evolutionary mechanisms of adaptation in systemic dimorphic fungi. 2018, Sci Rep 8(1):4473	29540755	Blastomyces_parvus	emmonsia_parva_gca_002572885	negative
Blastomyces percursus	Ascomycota	Eurotiomycetes	Onygenales	Ajellomycetaceae	Ensembl/Fungi	GCA_001883805.1	02/07/2019	Dukik, K.; Muñoz, J.F.; Jiang, Y.; Feng, P.; Sigler, L.; Stielow, J.B.; Freeke, J.; Jamalian, A.; Gerrits van den Ende, B.; McEwen, J.G.; Clay, O.K.; Schwartz, I.S.; Govender, N.P.; Maphanga, T.G.; Cuomo, C.A.; Moreno, L.F.; Kenyon, C.; Borman, A.M.; de Hoog, S. Novel taxa of thermally dimorphic systemic pathogens in the Ajellomycetaceae (Onygenales). 2017, Mycoses 60(5):296-309	28176377	Blastomyces_percursus	blastomyces_percursus_gca_001883805	negative
Blumeria graminis f. sp. hordei DH14	Ascomycota	Leotiomycetes	Erysiphales	Erysiphaceae	Ensembl/Fungi	GCA_000151065.2	02/07/2019	Spanu, P.D.; Abbott, J.C.; Amselem, J.; Burgis, T.A.; Soanes, D.M.; Stüber, K.; Ver Loren van Themaat, E.; Brown, J.K.; Butcher, S.A.; Gurr, S.J.; Lebrun, M.H.; Ridout, C.J.; Schulze-Lefert, P.; Talbot, N.J.; Ahmadinejad, N.; Ametz, C.; Barton, G.R.; Benjdia, M.; Bidzinski, P.; Bindschedler, L.V.; Both, M.; Brewer, M.T.; Cadle-Davidson, L.; Cadle-Davidson, M.M.; Collemare, J.; Cramer, R.; Frenkel…	21148392	Blumeria_graminis_f._sp._hordei_DH14	blumeria_graminis	negative
Blyttiomyces helicus	Chytridiomycota	Chytridiomycetes			JGI/Mycocosm	Blyhe1	01/06/2019	Ahrendt, S.R.; Quandt, C.A.; Ciobanu, D.; Clum, A.; Salamov, A.; Andreopoulos, B.; Cheng, J.F.; Woyke, T.; Pelin, A.; Henrissat, B.; Reynolds, N.K.; Benny, G.L.; Smith, M.E.; James, T.Y.; Grigoriev, I.V. Leveraging single-cell genomics to expand the fungal tree of life. 2018, Nat Microbiol 3(12):1417-1428	30297742	Blyttiomyces_helicus	blyttiomyces_helicus_single-cell	negative
Boletus edulis	Basidiomycota	Agaricomycetes	Boletales	Boletaceae	JGI/Mycocosm	Boledp1	20/04/2021	Miyauchi, S.; Kiss, E.; Kuo, A.; Drula, E.; Kohler, A.; Sánchez-García, M.; Morin, E.; Andreopoulos, B.; Barry, K.W.; Bonito, G.; Buée, M.; Carver, A.; Chen, C.; Cichocki, N.; Clum, A.; Culley, D.; Crous, P.W.; Fauchery, L.; Girlanda, M.; Hayes, R.D.; Kéri, Z.; LaButti, K.; Lipzen, A.; Lombard, V.; Magnuson, J.; Maillard, F.; Murat, C.; Nolan, M.; Ohm, R.A.; Pangilinan, J.; Pereira, M.F.; Perotto…	33046698	Boletus_edulis	boletus_edulis_p_ilba	negative
Boletus edulis BED1	Basidiomycota	Agaricomycetes	Boletales	Boletaceae	JGI/Mycocosm	Boled5	20/04/2021	Miyauchi, S.; Kiss, E.; Kuo, A.; Drula, E.; Kohler, A.; Sánchez-García, M.; Morin, E.; Andreopoulos, B.; Barry, K.W.; Bonito, G.; Buée, M.; Carver, A.; Chen, C.; Cichocki, N.; Clum, A.; Culley, D.; Crous, P.W.; Fauchery, L.; Girlanda, M.; Hayes, R.D.; Kéri, Z.; LaButti, K.; Lipzen, A.; Lombard, V.; Magnuson, J.; Maillard, F.; Murat, C.; Nolan, M.; Ohm, R.A.; Pangilinan, J.; Pereira, M.F.; Perotto…	33046698	Boletus_edulis_BED1	boletus_edulis_bed1	negative
Botryobasidium botryosum FD-172 SS1	Basidiomycota	Agaricomycetes	Cantharellales	Botryobasidiaceae	Ensembl/Fungi	GCA_000697705.1	02/07/2019	Riley, R.; Salamov, A.A.; Brown, D.W.; Nagy, L.G.; Floudas, D.; Held, B.W.; Levasseur, A.; Lombard, V.; Morin, E.; Otillar, R.; Lindquist, E.A.; Sun, H.; LaButti, K.M.; Schmutz, J.; Jabbour, D.; Luo, H.; Baker, S.E.; Pisabarro, A.G.; Walton, J.D.; Blanchette, R.A.; Henrissat, B.; Martin, F.; Cullen, D.; Hibbett, D.S.; Grigoriev, I.V. Extensive sampling of basidiomycete genomes demonstrates inadeq…	24958869	Botryobasidium_botryosum_FD-172_SS1	botryobasidium_botryosum_fd_172_ss1_gca_000697705	negative
Botryosphaeria dothidea	Ascomycota	Dothideomycetes	Botryosphaeriales	Botryosphaeriaceae	JGI/Mycocosm	Botdo1_1	01/06/2019	Marsberg, A.; Kemler, M.; Jami, F.; Nagel, J.H.; Postma-Smidt, A.; Naidoo, S.; Wingfield, M.J.; Crous, P.W.; Spatafora, J.W.; Hesse, C.N.; Robbertse, B.; Slippers, B. Botryosphaeria dothidea: a latent pathogen of global importance to woody plant health. 2017, Mol Plant Pathol 18(4):477-488	27682468	Botryosphaeria_dothidea	botryosphaeria_dothidea	negative
Botryotinia calthae	Ascomycota	Leotiomycetes	Helotiales	Sclerotiniaceae	NCBI/GenBank	GCA_004379285.1	01/07/2019	Valero-Jiménez, C.A.; Veloso, J.; Staats, M.; van Kan, J.A.L. Comparative genomics of plant pathogenic Botrytis species with distinct host specificity. 2019, BMC Genomics 20(1):203	30866801	Botryotinia_calthae	Botryotinia_calthae	negative
Botryotinia convoluta	Ascomycota	Leotiomycetes	Helotiales	Sclerotiniaceae	NCBI/GenBank	GCA_004786275.1	01/07/2019	Valero-Jiménez, C.A.; Veloso, J.; Staats, M.; van Kan, J.A.L. Comparative genomics of plant pathogenic Botrytis species with distinct host specificity. 2019, BMC Genomics 20(1):203	30866801	Botryotinia_convoluta	Botryotinia_convoluta	negative
Botryotinia narcissicola	Ascomycota	Leotiomycetes	Helotiales	Sclerotiniaceae	NCBI/GenBank	GCA_004786225.1	01/07/2019	Valero-Jiménez, C.A.; Veloso, J.; Staats, M.; van Kan, J.A.L. Comparative genomics of plant pathogenic Botrytis species with distinct host specificity. 2019, BMC Genomics 20(1):203	30866801	Botryotinia_narcissicola	Botryotinia_narcissicola	negative
Botrytis cinerea B05.10	Ascomycota	Leotiomycetes	Helotiales	Sclerotiniaceae	Ensembl/Fungi	GCA_000143535.4	02/07/2019	Staats, M.; van Kan, J.A. Genome update of Botrytis cinerea strains B05.10 and T4. 2012, Eukaryot Cell 11(11):1413-4	23104368	Botrytis_cinerea_B05.10	botrytis_cinerea	negative
Botrytis elliptica	Ascomycota	Leotiomycetes	Helotiales	Sclerotiniaceae	NCBI/GenBank	GCA_004786205.1	01/07/2019	Valero-Jiménez, C.A.; Veloso, J.; Staats, M.; van Kan, J.A.L. Comparative genomics of plant pathogenic Botrytis species with distinct host specificity. 2019, BMC Genomics 20(1):203	30866801	Botrytis_elliptica	Botrytis_elliptica	negative
Botrytis fragariae	Ascomycota	Leotiomycetes	Helotiales	Sclerotiniaceae	NCBI/RefSeq	GCF_013461495.1	17/05/2021	Wu, Y.; Saski, C.; Schnabel, G.; Xiao, S.; Hu, M. A High-Quality Genome Resource of <i>Botrytis fragariae</i>, a New and Rapidly Spreading Fungal Pathogen Causing Strawberry Gray Mold in the United States. 2021, Phytopathology 111(3):496-499	32648525	Botrytis_fragariae	Botrytis_fragariae	negative
Botrytis galanthina	Ascomycota	Leotiomycetes	Helotiales	Sclerotiniaceae	NCBI/GenBank	GCA_004916875.1	01/07/2019	Valero-Jiménez, C.A.; Veloso, J.; Staats, M.; van Kan, J.A.L. Comparative genomics of plant pathogenic Botrytis species with distinct host specificity. 2019, BMC Genomics 20(1):203	30866801	Botrytis_galanthina	Botrytis_galanthina	negative
Botrytis hyacinthi	Ascomycota	Leotiomycetes	Helotiales	Sclerotiniaceae	NCBI/GenBank	GCA_004786245.1	01/07/2019	Valero-Jiménez, C.A.; Veloso, J.; Staats, M.; van Kan, J.A.L. Comparative genomics of plant pathogenic Botrytis species with distinct host specificity. 2019, BMC Genomics 20(1):203	30866801	Botrytis_hyacinthi	Botrytis_hyacinthi	negative
Botrytis paeoniae	Ascomycota	Leotiomycetes	Helotiales	Sclerotiniaceae	NCBI/GenBank	GCA_004786145.1	01/07/2019	Valero-Jiménez, C.A.; Veloso, J.; Staats, M.; van Kan, J.A.L. Comparative genomics of plant pathogenic Botrytis species with distinct host specificity. 2019, BMC Genomics 20(1):203	30866801	Botrytis_paeoniae	Botrytis_paeoniae	negative
Botrytis porri	Ascomycota	Leotiomycetes	Helotiales	Sclerotiniaceae	NCBI/GenBank	GCA_004786265.1	01/07/2019	Valero-Jiménez, C.A.; Veloso, J.; Staats, M.; van Kan, J.A.L. Comparative genomics of plant pathogenic Botrytis species with distinct host specificity. 2019, BMC Genomics 20(1):203	30866801	Botrytis_porri	Botrytis_porri	negative
Botrytis tulipae	Ascomycota	Leotiomycetes	Helotiales	Sclerotiniaceae	NCBI/GenBank	GCA_004786125.1	01/07/2019	Valero-Jiménez, C.A.; Veloso, J.; Staats, M.; van Kan, J.A.L. Comparative genomics of plant pathogenic Botrytis species with distinct host specificity. 2019, BMC Genomics 20(1):203	30866801	Botrytis_tulipae	Botrytis_tulipae	negative
Brettanomyces bruxellensis	Ascomycota	Saccharomycetes	Saccharomycetales	Pichiaceae	NCBI/RefSeq	GCF_011074885.1	17/05/2021	Roach, M.J.; Borneman, A.R. New genome assemblies reveal patterns of domestication and adaptation across Brettanomyces (Dekkera) species. 2020, BMC Genomics 21(1):194	32122298	Brettanomyces_bruxellensis	Brettanomyces_bruxellensis	negative
Brettanomyces bruxellensis CBS 2499	Ascomycota	Saccharomycetes	Saccharomycetales	Pichiaceae	JGI/Mycocosm	Dekbr2	01/06/2019	Piškur, J.; Ling, Z.; Marcet-Houben, M.; Ishchuk, O.P.; Aerts, A.; LaButti, K.; Copeland, A.; Lindquist, E.; Barry, K.; Compagno, C.; Bisson, L.; Grigoriev, I.V.; Gabaldón, T.; Phister, T. The genome of wine yeast Dekkera bruxellensis provides a tool to explore its food-related properties. 2012, Int J Food Microbiol 157(2):202-9	22663979	Brettanomyces_bruxellensis_CBS_2499	dekkera_bruxellensis_cbs_2499	negative
Byssochlamys nivea	Ascomycota	Eurotiomycetes	Eurotiales	Thermoascaceae	JGI/Mycocosm	Bysni1	01/06/2019	Biango-Daniels, M.N.; Wang, T.W.; Hodge, K.T. Draft Genome Sequence of the Patulin-Producing Fungus Paecilomyces niveus Strain CO7. 2018, Genome Announc 6(25):None	29930063	Byssochlamys_nivea	paecilomyces_niveus_co7	negative
Byssochlamys spectabilis No. 5	Ascomycota	Eurotiomycetes	Eurotiales	Thermoascaceae	Ensembl/Fungi	GCA_000497085.1	02/07/2019	Oka, T.; Ekino, K.; Fukuda, K.; Nomura, Y. Draft Genome Sequence of the Formaldehyde-Resistant Fungus Byssochlamys spectabilis No. 5 (Anamorph Paecilomyces variotii No. 5) (NBRC109023). 2014, Genome Announc 2(1):None	24407650	Byssochlamys_spectabilis_No._5	byssochlamys_spectabilis_no_5_gca_000497085	negative
Byssothecium circinans	Ascomycota	Dothideomycetes	Pleosporales	Massarinaceae	JGI/Mycocosm	Bysci1	20/04/2021	Haridas, S.; Albert, R.; Binder, M.; Bloem, J.; LaButti, K.; Salamov, A.; Andreopoulos, B.; Baker, S.E.; Barry, K.; Bills, G.; Bluhm, B.H.; Cannon, C.; Castanera, R.; Culley, D.E.; Daum, C.; Ezra, D.; González, J.B.; Henrissat, B.; Kuo, A.; Liang, C.; Lipzen, A.; Lutzoni, F.; Magnuson, J.; Mondo, S.J.; Nolan, M.; Ohm, R.A.; Pangilinan, J.; Park, H.J.; Ramírez, L.; Alfaro, M.; Sun, H.; Tritt, A.; …	32206138	Byssothecium_circinans	byssothecium_circinans_cbs_675.92	positive
Cadophora sp. DSE1049	Ascomycota	Leotiomycetes	Helotiales		Ensembl/Fungi	GCA_003073865.1	02/07/2019	Knapp, D.G.; Németh, J.B.; Barry, K.; Hainaut, M.; Henrissat, B.; Johnson, J.; Kuo, A.; Lim, J.H.P.; Lipzen, A.; Nolan, M.; Ohm, R.A.; Tamás, L.; Grigoriev, I.V.; Spatafora, J.W.; Nagy, L.G.; Kovács, G.M. Comparative genomics provides insights into the lifestyle and reveals functional heterogeneity of dark septate endophytic fungi. 2018, Sci Rep 8(1):6321	29679020	Cadophora_sp._DSE1049	cadophora_sp_dse1049_gca_003073865	negative
Calocera cornea HHB12733	Basidiomycota	Dacrymycetes	Dacrymycetales	Dacrymycetaceae	Ensembl/Fungi	GCA_001632435.1	02/07/2019	Nagy, L.G.; Riley, R.; Tritt, A.; Adam, C.; Daum, C.; Floudas, D.; Sun, H.; Yadav, J.S.; Pangilinan, J.; Larsson, K.H.; Matsuura, K.; Barry, K.; Labutti, K.; Kuo, R.; Ohm, R.A.; Bhattacharya, S.S.; Shirouzu, T.; Yoshinaga, Y.; Martin, F.M.; Grigoriev, I.V.; Hibbett, D.S. Comparative Genomics of Early-Diverging Mushroom-Forming Fungi Provides Insights into the Origins of Lignocellulose Decay Capab…	26659563	Calocera_cornea_HHB12733	calocera_cornea_hhb12733_gca_001632435	negative
Calocera viscosa TUFC12733	Basidiomycota	Dacrymycetes	Dacrymycetales	Dacrymycetaceae	Ensembl/Fungi	GCA_001630345.1	02/07/2019	Nagy, L.G.; Riley, R.; Tritt, A.; Adam, C.; Daum, C.; Floudas, D.; Sun, H.; Yadav, J.S.; Pangilinan, J.; Larsson, K.H.; Matsuura, K.; Barry, K.; Labutti, K.; Kuo, R.; Ohm, R.A.; Bhattacharya, S.S.; Shirouzu, T.; Yoshinaga, Y.; Martin, F.M.; Grigoriev, I.V.; Hibbett, D.S. Comparative Genomics of Early-Diverging Mushroom-Forming Fungi Provides Insights into the Origins of Lignocellulose Decay Capab…	26659563	Calocera_viscosa_TUFC12733	calocera_viscosa_tufc12733_gca_001630345	negative
Candida albicans SC5314	Ascomycota	Saccharomycetes	Saccharomycetales	Debaryomycetaceae	NCBI/RefSeq	GCF_000182965.3	01/06/2019	van het Hoog, M.; Rast, T.J.; Martchenko, M.; Grindle, S.; Dignard, D.; Hogues, H.; Cuomo, C.; Berriman, M.; Scherer, S.; Magee, B.B.; Whiteway, M.; Chibana, H.; Nantel, A.; Magee, P.T. Assembly of the Candida albicans genome into sixteen supercontigs aligned on the eight chromosomes. 2007, Genome Biol 8(4):R52	17419877	Candida_albicans_SC5314	Candida_albicans	negative
Candida dubliniensis CD36	Ascomycota	Saccharomycetes	Saccharomycetales	Debaryomycetaceae	Ensembl/Fungi	GCA_000026945.1	02/07/2019	Jackson, A.P.; Gamble, J.A.; Yeomans, T.; Moran, G.P.; Saunders, D.; Harris, D.; Aslett, M.; Barrell, J.F.; Butler, G.; Citiulo, F.; Coleman, D.C.; de Groot, P.W.; Goodwin, T.J.; Quail, M.A.; McQuillan, J.; Munro, C.A.; Pain, A.; Poulter, R.T.; Rajandream, M.A.; Renauld, H.; Spiering, M.J.; Tivey, A.; Gow, N.A.; Barrell, B.; Sullivan, D.J.; Berriman, M. Comparative genomics of the fungal pathogen…	19745113	Candida_dubliniensis_CD36	candida_dubliniensis_cd36_gca_000026945	negative
Candida orthopsilosis Co 90-125	Ascomycota	Saccharomycetes	Saccharomycetales	Debaryomycetaceae	Ensembl/Fungi	GCA_000315875.1	02/07/2019	Riccombeni, A.; Vidanes, G.; Proux-Wéra, E.; Wolfe, K.H.; Butler, G. Sequence and analysis of the genome of the pathogenic yeast Candida orthopsilosis. 2012, PLoS One 7(4):e35750	22563396	Candida_orthopsilosis_Co_90-125	candida_orthopsilosis_co_90_125_gca_000315875	negative
Candida parapsilosis	Ascomycota	Saccharomycetes	Saccharomycetales	Debaryomycetaceae	Ensembl/Fungi	GCA_000182765.2	02/07/2019	Butler, G.; Rasmussen, M.D.; Lin, M.F.; Santos, M.A.; Sakthikumar, S.; Munro, C.A.; Rheinbay, E.; Grabherr, M.; Forche, A.; Reedy, J.L.; Agrafioti, I.; Arnaud, M.B.; Bates, S.; Brown, A.J.; Brunke, S.; Costanzo, M.C.; Fitzpatrick, D.A.; de Groot, P.W.; Harris, D.; Hoyer, L.L.; Hube, B.; Klis, F.M.; Kodira, C.; Lennard, N.; Logue, M.E.; Martin, R.; Neiman, A.M.; Nikolaou, E.; Quail, M.A.; Quinn, J…	19465905	Candida_parapsilosis	candida_parapsilosis_gca_000182765	negative
Candida tropicalis MYA-3404	Ascomycota	Saccharomycetes	Saccharomycetales	Debaryomycetaceae	Ensembl/Fungi	GCA_000006335.3	02/07/2019	Butler, G.; Rasmussen, M.D.; Lin, M.F.; Santos, M.A.; Sakthikumar, S.; Munro, C.A.; Rheinbay, E.; Grabherr, M.; Forche, A.; Reedy, J.L.; Agrafioti, I.; Arnaud, M.B.; Bates, S.; Brown, A.J.; Brunke, S.; Costanzo, M.C.; Fitzpatrick, D.A.; de Groot, P.W.; Harris, D.; Hoyer, L.L.; Hube, B.; Klis, F.M.; Kodira, C.; Lennard, N.; Logue, M.E.; Martin, R.; Neiman, A.M.; Nikolaou, E.; Quail, M.A.; Quinn, J…	19465905	Candida_tropicalis_MYA-3404	candida_tropicalis_mya_3404_gca_000006335	negative
Cantharellus anzutake	Basidiomycota	Agaricomycetes	Cantharellales	Cantharellaceae	JGI/Mycocosm	Cananz1	20/04/2021	Miyauchi, S.; Kiss, E.; Kuo, A.; Drula, E.; Kohler, A.; Sánchez-García, M.; Morin, E.; Andreopoulos, B.; Barry, K.W.; Bonito, G.; Buée, M.; Carver, A.; Chen, C.; Cichocki, N.; Clum, A.; Culley, D.; Crous, P.W.; Fauchery, L.; Girlanda, M.; Hayes, R.D.; Kéri, Z.; LaButti, K.; Lipzen, A.; Lombard, V.; Magnuson, J.; Maillard, F.; Murat, C.; Nolan, M.; Ohm, R.A.; Pangilinan, J.; Pereira, M.F.; Perotto…	33046698	Cantharellus_anzutake	cantharellus_anzutake_c23	negative
Capronia coronata CBS 617.96	Ascomycota	Eurotiomycetes	Chaetothyriales	Herpotrichiellaceae	Ensembl/Fungi	GCA_000585585.1	02/07/2019	Teixeira, M.M.; Moreno, L.F.; Stielow, B.J.; Muszewska, A.; Hainaut, M.; Gonzaga, L.; Abouelleil, A.; Patané, J.S.; Priest, M.; Souza, R.; Young, S.; Ferreira, K.S.; Zeng, Q.; da Cunha, M.M.; Gladki, A.; Barker, B.; Vicente, V.A.; de Souza, E.M.; Almeida, S.; Henrissat, B.; Vasconcelos, A.T.; Deng, S.; Voglmayr, H.; Moussa, T.A.; Gorbushina, A.; Felipe, M.S.; Cuomo, C.A.; de Hoog, G.S. Exploring …	28348446	Capronia_coronata_CBS_617.96	capronia_coronata_cbs_617_96_gca_000585585	negative
Capronia epimyces CBS 606.96	Ascomycota	Eurotiomycetes	Chaetothyriales	Herpotrichiellaceae	Ensembl/Fungi	GCA_000585565.1	02/07/2019	Teixeira, M.M.; Moreno, L.F.; Stielow, B.J.; Muszewska, A.; Hainaut, M.; Gonzaga, L.; Abouelleil, A.; Patané, J.S.; Priest, M.; Souza, R.; Young, S.; Ferreira, K.S.; Zeng, Q.; da Cunha, M.M.; Gladki, A.; Barker, B.; Vicente, V.A.; de Souza, E.M.; Almeida, S.; Henrissat, B.; Vasconcelos, A.T.; Deng, S.; Voglmayr, H.; Moussa, T.A.; Gorbushina, A.; Felipe, M.S.; Cuomo, C.A.; de Hoog, G.S. Exploring …	28348446	Capronia_epimyces_CBS_606.96	capronia_epimyces_cbs_606_96_gca_000585565	negative
Catenaria anguillulae PL171	Blastocladiomycota	Blastocladiomycetes	Blastocladiales	Catenariaceae	Ensembl/Fungi	GCA_002102555.1	02/07/2019	Mondo, S.J.; Dannebaum, R.O.; Kuo, R.C.; Louie, K.B.; Bewick, A.J.; LaButti, K.; Haridas, S.; Kuo, A.; Salamov, A.; Ahrendt, S.R.; Lau, R.; Bowen, B.P.; Lipzen, A.; Sullivan, W.; Andreopoulos, B.B.; Clum, A.; Lindquist, E.; Daum, C.; Northen, T.R.; Kunde-Ramamoorthy, G.; Schmitz, R.J.; Gryganskyi, A.; Culley, D.; Magnuson, J.; James, T.Y.; O'Malley, M.A.; Stajich, J.E.; Spatafora, J.W.; Visel, A.…	28481340	Catenaria_anguillulae_PL171	catenaria_anguillulae_pl171_gca_002102555	negative
Caulochytrium protostelioides	Chytridiomycota	Chytridiomycetes	Caulochytriales	Caulochytriaceae	NCBI/GenBank	GCA_003615045.1	01/07/2019	Ahrendt, S.R.; Quandt, C.A.; Ciobanu, D.; Clum, A.; Salamov, A.; Andreopoulos, B.; Cheng, J.F.; Woyke, T.; Pelin, A.; Henrissat, B.; Reynolds, N.K.; Benny, G.L.; Smith, M.E.; James, T.Y.; Grigoriev, I.V. Leveraging single-cell genomics to expand the fungal tree of life. 2018, Nat Microbiol 3(12):1417-1428	30297742	Caulochytrium_protostelioides	Caulochytrium_protostelioides	negative
Cenococcum geophilum 1.58	Ascomycota	Dothideomycetes		Gloniaceae	NCBI/GenBank	GCA_001692895.1	01/06/2019	Peter, M.; Kohler, A.; Ohm, R.A.; Kuo, A.; Krützmann, J.; Morin, E.; Arend, M.; Barry, K.W.; Binder, M.; Choi, C.; Clum, A.; Copeland, A.; Grisel, N.; Haridas, S.; Kipfer, T.; LaButti, K.; Lindquist, E.; Lipzen, A.; Maire, R.; Meier, B.; Mihaltcheva, S.; Molinier, V.; Murat, C.; Pöggeler, S.; Quandt, C.A.; Sperisen, C.; Tritt, A.; Tisserant, E.; Crous, P.W.; Henrissat, B.; Nehls, U.; Egli, S.; Sp…	27601008	Cenococcum_geophilum_1.58	Cenococcum_geophilum	negative
Ceraceosorus bombacis	Basidiomycota	Exobasidiomycetes	Ceraceosorales	Ceraceosoraceae	Ensembl/Fungi	GCA_900000165.1	02/07/2019	Sharma, R.; Xia, X.; Riess, K.; Bauer, R.; Thines, M. Comparative Genomics Including the Early-Diverging Smut Fungus Ceraceosorus bombacis Reveals Signatures of Parallel Evolution within Plant and Animal Pathogens of Fungi and Oomycetes. 2015, Genome Biol Evol 7(9):2781-98	26314305	Ceraceosorus_bombacis	ceraceosorus_bombacis_gca_900000165	negative
Ceraceosorus guamensis	Basidiomycota	Exobasidiomycetes	Ceraceosorales	Ceraceosoraceae	Ensembl/Fungi	GCA_003144195.1	02/07/2019	Kijpornyongpan, T.; Mondo, S.J.; Barry, K.; Sandor, L.; Lee, J.; Lipzen, A.; Pangilinan, J.; LaButti, K.; Hainaut, M.; Henrissat, B.; Grigoriev, I.V.; Spatafora, J.W.; Aime, M.C. Broad Genomic Sampling Reveals a Smut Pathogenic Ancestry of the Fungal Clade Ustilaginomycotina. 2018, Mol Biol Evol 35(8):1840-1854	29771364	Ceraceosorus_guamensis	ceraceosorus_guamensis_gca_003144195	negative
Ceratobasidium sp.	Basidiomycota	Agaricomycetes	Cantharellales	Ceratobasidiaceae	JGI/Mycocosm	CerAGI	20/04/2021	Miyauchi, S.; Kiss, E.; Kuo, A.; Drula, E.; Kohler, A.; Sánchez-García, M.; Morin, E.; Andreopoulos, B.; Barry, K.W.; Bonito, G.; Buée, M.; Carver, A.; Chen, C.; Cichocki, N.; Clum, A.; Culley, D.; Crous, P.W.; Fauchery, L.; Girlanda, M.; Hayes, R.D.; Kéri, Z.; LaButti, K.; Lipzen, A.; Lombard, V.; Magnuson, J.; Maillard, F.; Murat, C.; Nolan, M.; Ohm, R.A.; Pangilinan, J.; Pereira, M.F.; Perotto…	33046698	Ceratobasidium_sp.	ceratobasidium_sp._anastomosis_group_i_dn8442	negative
Ceratocystis fimbriata CBS 114723	Ascomycota	Sordariomycetes	Microascales	Ceratocystidaceae	NCBI/GenBank	GCA_000389695.3	01/07/2019	Wilken, P.M.; Steenkamp, E.T.; Wingfield, M.J.; de Beer, Z.W.; Wingfield, B.D. IMA Genome-F 1: Ceratocystis fimbriata: Draft nuclear genome sequence for the plant pathogen, Ceratocystis fimbriata. 2013, IMA Fungus 4(2):357-8	24563841	Ceratocystis_fimbriata_CBS_114723	Ceratocystis_fimbriata	negative
Cercospora berteroae	Ascomycota	Dothideomycetes	Capnodiales	Mycosphaerellaceae	Ensembl/Fungi	GCA_002933655.1	02/07/2019	de Jonge, R.; Ebert, M.K.; Huitt-Roehl, C.R.; Pal, P.; Suttle, J.C.; Spanner, R.E.; Neubauer, J.D.; Jurick, W.M.; Stott, K.A.; Secor, G.A.; Thomma, B.P.H.J.; Van de Peer, Y.; Townsend, C.A.; Bolton, M.D. Gene cluster conservation provides insight into cercosporin biosynthesis and extends production to the genus <i>Colletotrichum</i>. 2018, Proc Natl Acad Sci U S A 115(24):E5459-E5466	29844193	Cercospora_berteroae	cercospora_berteroae_gca_002933655	negative
Cercospora beticola	Ascomycota	Dothideomycetes	Capnodiales	Mycosphaerellaceae	Ensembl/Fungi	GCA_002742065.1	02/07/2019	de Jonge, R.; Ebert, M.K.; Huitt-Roehl, C.R.; Pal, P.; Suttle, J.C.; Spanner, R.E.; Neubauer, J.D.; Jurick, W.M.; Stott, K.A.; Secor, G.A.; Thomma, B.P.H.J.; Van de Peer, Y.; Townsend, C.A.; Bolton, M.D. Gene cluster conservation provides insight into cercosporin biosynthesis and extends production to the genus <i>Colletotrichum</i>. 2018, Proc Natl Acad Sci U S A 115(24):E5459-E5466	29844193	Cercospora_beticola	cercospora_beticola_gca_002742065	negative
Cercospora zeae-maydis	Ascomycota	Dothideomycetes	Mycosphaerellales	Mycosphaerellaceae	JGI/Mycocosm	Cerzm1	20/04/2021	Haridas, S.; Albert, R.; Binder, M.; Bloem, J.; LaButti, K.; Salamov, A.; Andreopoulos, B.; Baker, S.E.; Barry, K.; Bills, G.; Bluhm, B.H.; Cannon, C.; Castanera, R.; Culley, D.E.; Daum, C.; Ezra, D.; González, J.B.; Henrissat, B.; Kuo, A.; Liang, C.; Lipzen, A.; Lutzoni, F.; Magnuson, J.; Mondo, S.J.; Nolan, M.; Ohm, R.A.; Pangilinan, J.; Park, H.J.; Ramírez, L.; Alfaro, M.; Sun, H.; Tritt, A.; …	32206138	Cercospora_zeae-maydis	cercospora_zeae-maydis	negative
Cercospora zeina	Ascomycota	Dothideomycetes	Capnodiales	Mycosphaerellaceae	Ensembl/Fungi	GCA_002844615.1	02/07/2019	Wingfield, B.D.; Berger, D.K.; Steenkamp, E.T.; Lim, H.J.; Duong, T.A.; Bluhm, B.H.; de Beer, Z.W.; De Vos, L.; Fourie, G.; Naidoo, K.; Olivier, N.; Lin, Y.C.; Van de Peer, Y.; Joubert, F.; Crampton, B.G.; Swart, V.; Soal, N.; Tatham, C.; van der Nest, M.A.; van der Merwe, N.A.; van Wyk, S.; Wilken, P.M.; Wingfield, M.J. IMA Genome-F 8: Draft genome of <i>Cercospora zeina</i>, <i>Fusarium pininem…	29242781	Cercospora_zeina	cercospora_zeina_gca_002844615	negative
Chaetomium globosum CBS 148.51	Ascomycota	Sordariomycetes	Sordariales	Chaetomiaceae	Ensembl/Fungi	GCA_000143365.1	02/07/2019	Cuomo, C.A.; Untereiner, W.A.; Ma, L.J.; Grabherr, M.; Birren, B.W. Draft Genome Sequence of the Cellulolytic Fungus Chaetomium globosum. 2015, Genome Announc 3(1):None	25720678	Chaetomium_globosum_CBS_148.51	chaetomium_globosum_cbs_148_51_gca_000143365	negative
Chaetomium thermophilum var. thermophilum DSM 1495	Ascomycota	Sordariomycetes	Sordariales	Chaetomiaceae	Ensembl/Fungi	GCA_000221225.1	02/07/2019	Amlacher, S.; Sarges, P.; Flemming, D.; van Noort, V.; Kunze, R.; Devos, D.P.; Arumugam, M.; Bork, P.; Hurt, E. Insight into structure and assembly of the nuclear pore complex by utilizing the genome of a eukaryotic thermophile. 2011, Cell 146(2):277-89	21784248	Chaetomium_thermophilum_var._thermophilum_DSM_1495	chaetomium_thermophilum_var_thermophilum_dsm_1495_gca_000221225	negative
Chalara longipes BDJ	Ascomycota	Leotiomycetes	Helotiales		JGI/Mycocosm	Chalo1	20/04/2021	Barbi, F.; Kohler, A.; Barry, K.; Baskaran, P.; Daum, C.; Fauchery, L.; Ihrmark, K.; Kuo, A.; LaButti, K.; Lipzen, A.; Morin, E.; Grigoriev, I.V.; Henrissat, B.; Lindahl, B.D.; Martin, F. Fungal ecological strategies reflected in gene transcription - a case study of two litter decomposers. 2020, Environ Microbiol 22(3):1089-1103	31760680	Chalara_longipes_BDJ	chalara_longipes_bdj	negative
Chlorociboria aeruginascens	Ascomycota	Leotiomycetes	Helotiales	Chlorociboriaceae	NCBI/GenBank	GCA_002276475.2	01/07/2019	Büttner, E.; Liers, C.; Gebauer, A.M.; Collemare, J.; Navarro-Muñoz, J.C.; Hofrichter, M.; Kellner, H. Draft Genome Sequence of the Wood-Staining Ascomycete <i>Chlorociboria aeruginascens</i> DSM 107184. 2019, Microbiol Resour Announc 8(17):None	31023795	Chlorociboria_aeruginascens	Chlorociboria_aeruginascens	negative
Choanephora cucurbitarum	Mucoromycota	Mucoromycetes	Mucorales	Choanephoraceae	Ensembl/Fungi	GCA_001683725.1	02/07/2019	Min, B.; Park, J.H.; Park, H.; Shin, H.D.; Choi, I.G. Genome Analysis of a Zygomycete Fungus Choanephora cucurbitarum Elucidates Necrotrophic Features Including Bacterial Genes Related to Plant Colonization. 2017, Sci Rep 7(None):40432	28091548	Choanephora_cucurbitarum	choanephora_cucurbitarum_gca_001683725	negative
Choiromyces venosus 120613-1	Ascomycota	Pezizomycetes	Pezizales	Tuberaceae	NCBI/GenBank	GCA_003788595.2	01/07/2019	Murat, C.; Payen, T.; Noel, B.; Kuo, A.; Morin, E.; Chen, J.; Kohler, A.; Krizsán, K.; Balestrini, R.; Da Silva, C.; Montanini, B.; Hainaut, M.; Levati, E.; Barry, K.W.; Belfiori, B.; Cichocki, N.; Clum, A.; Dockter, R.B.; Fauchery, L.; Guy, J.; Iotti, M.; Le Tacon, F.; Lindquist, E.A.; Lipzen, A.; Malagnac, F.; Mello, A.; Molinier, V.; Miyauchi, S.; Poulain, J.; Riccioni, C.; Rubini, A.; Sitrit,…	30420746	Choiromyces_venosus_120613-1	Choiromyces_venosus	negative
Citeromyces matritensis	Ascomycota	Saccharomycetes	Saccharomycetales	Saccharomycetaceae	JGI/Mycocosm	Citma1	01/06/2019	Krassowski, T.; Coughlan, A.Y.; Shen, X.X.; Zhou, X.; Kominek, J.; Opulente, D.A.; Riley, R.; Grigoriev, I.V.; Maheshwari, N.; Shields, D.C.; Kurtzman, C.P.; Hittinger, C.T.; Rokas, A.; Wolfe, K.H. Evolutionary instability of CUG-Leu in the genetic code of budding yeasts. 2018, Nat Commun 9(1):1887	29760453	Citeromyces_matritensis	citeromyces_matritensis_nrrl_y-2407	negative
Cladonia grayi	Ascomycota	Lecanoromycetes	Lecanorales	Cladoniaceae	JGI/Mycocosm	Clagr3	01/06/2019	Armaleo, D.; Müller, O.; Lutzoni, F.; Andrésson, Ó.S.; Blanc, G.; Bode, H.B.; Collart, F.R.; Dal Grande, F.; Dietrich, F.; Grigoriev, I.V.; Joneson, S.; Kuo, A.; Larsen, P.E.; Logsdon, J.M.; Lopez, D.; Martin, F.; May, S.P.; McDonald, T.R.; Merchant, S.S.; Miao, V.; Morin, E.; Oono, R.; Pellegrini, M.; Rubinstein, N.; Sanchez-Puerta, M.V.; Savelkoul, E.; Schmitt, I.; Slot, J.C.; Soanes, D.; Szövé…	31337355	Cladonia_grayi	cladonia_grayi_cgr_da2myc_ss	negative
Cladophialophora bantiana CBS 173.52	Ascomycota	Eurotiomycetes	Chaetothyriales	Herpotrichiellaceae	Ensembl/Fungi	GCA_000835475.1	02/07/2019	Teixeira, M.M.; Moreno, L.F.; Stielow, B.J.; Muszewska, A.; Hainaut, M.; Gonzaga, L.; Abouelleil, A.; Patané, J.S.; Priest, M.; Souza, R.; Young, S.; Ferreira, K.S.; Zeng, Q.; da Cunha, M.M.; Gladki, A.; Barker, B.; Vicente, V.A.; de Souza, E.M.; Almeida, S.; Henrissat, B.; Vasconcelos, A.T.; Deng, S.; Voglmayr, H.; Moussa, T.A.; Gorbushina, A.; Felipe, M.S.; Cuomo, C.A.; de Hoog, G.S. Exploring …	28348446	Cladophialophora_bantiana_CBS_173.52	cladophialophora_bantiana_cbs_173_52_gca_000835475	negative
Cladophialophora carrionii CBS 160.54	Ascomycota	Eurotiomycetes	Chaetothyriales	Herpotrichiellaceae	Ensembl/Fungi	GCA_000365165.2	02/07/2019	Teixeira, M.M.; Moreno, L.F.; Stielow, B.J.; Muszewska, A.; Hainaut, M.; Gonzaga, L.; Abouelleil, A.; Patané, J.S.; Priest, M.; Souza, R.; Young, S.; Ferreira, K.S.; Zeng, Q.; da Cunha, M.M.; Gladki, A.; Barker, B.; Vicente, V.A.; de Souza, E.M.; Almeida, S.; Henrissat, B.; Vasconcelos, A.T.; Deng, S.; Voglmayr, H.; Moussa, T.A.; Gorbushina, A.; Felipe, M.S.; Cuomo, C.A.; de Hoog, G.S. Exploring …	28348446	Cladophialophora_carrionii_CBS_160.54	cladophialophora_carrionii_cbs_160_54_gca_000365165	negative
Cladophialophora immunda	Ascomycota	Eurotiomycetes	Chaetothyriales	Herpotrichiellaceae	Ensembl/Fungi	GCA_000835495.1	02/07/2019	Teixeira, M.M.; Moreno, L.F.; Stielow, B.J.; Muszewska, A.; Hainaut, M.; Gonzaga, L.; Abouelleil, A.; Patané, J.S.; Priest, M.; Souza, R.; Young, S.; Ferreira, K.S.; Zeng, Q.; da Cunha, M.M.; Gladki, A.; Barker, B.; Vicente, V.A.; de Souza, E.M.; Almeida, S.; Henrissat, B.; Vasconcelos, A.T.; Deng, S.; Voglmayr, H.; Moussa, T.A.; Gorbushina, A.; Felipe, M.S.; Cuomo, C.A.; de Hoog, G.S. Exploring …	28348446	Cladophialophora_immunda	cladophialophora_immunda_gca_000835495	positive
Cladophialophora psammophila CBS 110553	Ascomycota	Eurotiomycetes	Chaetothyriales	Herpotrichiellaceae	Ensembl/Fungi	GCA_000585535.1	02/07/2019	Teixeira, M.M.; Moreno, L.F.; Stielow, B.J.; Muszewska, A.; Hainaut, M.; Gonzaga, L.; Abouelleil, A.; Patané, J.S.; Priest, M.; Souza, R.; Young, S.; Ferreira, K.S.; Zeng, Q.; da Cunha, M.M.; Gladki, A.; Barker, B.; Vicente, V.A.; de Souza, E.M.; Almeida, S.; Henrissat, B.; Vasconcelos, A.T.; Deng, S.; Voglmayr, H.; Moussa, T.A.; Gorbushina, A.; Felipe, M.S.; Cuomo, C.A.; de Hoog, G.S. Exploring …	28348446	Cladophialophora_psammophila_CBS_110553	cladophialophora_psammophila_cbs_110553_gca_000585535	negative
Cladophialophora yegresii CBS 114405	Ascomycota	Eurotiomycetes	Chaetothyriales	Herpotrichiellaceae	Ensembl/Fungi	GCA_000585515.1	02/07/2019	Teixeira, M.M.; Moreno, L.F.; Stielow, B.J.; Muszewska, A.; Hainaut, M.; Gonzaga, L.; Abouelleil, A.; Patané, J.S.; Priest, M.; Souza, R.; Young, S.; Ferreira, K.S.; Zeng, Q.; da Cunha, M.M.; Gladki, A.; Barker, B.; Vicente, V.A.; de Souza, E.M.; Almeida, S.; Henrissat, B.; Vasconcelos, A.T.; Deng, S.; Voglmayr, H.; Moussa, T.A.; Gorbushina, A.; Felipe, M.S.; Cuomo, C.A.; de Hoog, G.S. Exploring …	28348446	Cladophialophora_yegresii_CBS_114405	cladophialophora_yegresii_cbs_114405_gca_000585515	negative
Cladosporium sphaerospermum UM 843	Ascomycota	Dothideomycetes	Capnodiales	Cladosporiaceae	JGI/Mycocosm	Clasph1	01/06/2019	Ng, K.P.; Yew, S.M.; Chan, C.L.; Soo-Hoo, T.S.; Na, S.L.; Hassan, H.; Ngeow, Y.F.; Hoh, C.C.; Lee, K.W.; Yee, W.Y. Sequencing of Cladosporium sphaerospermum, a Dematiaceous fungus isolated from blood culture. 2012, Eukaryot Cell 11(5):705-6	22544899	Cladosporium_sphaerospermum_UM_843	cladosporium_sphaerospermum_um_843	negative
Clathrospora elynae	Ascomycota	Dothideomycetes	Pleosporales	Diademaceae	JGI/Mycocosm	Clael1	20/04/2021	Haridas, S.; Albert, R.; Binder, M.; Bloem, J.; LaButti, K.; Salamov, A.; Andreopoulos, B.; Baker, S.E.; Barry, K.; Bills, G.; Bluhm, B.H.; Cannon, C.; Castanera, R.; Culley, D.E.; Daum, C.; Ezra, D.; González, J.B.; Henrissat, B.; Kuo, A.; Liang, C.; Lipzen, A.; Lutzoni, F.; Magnuson, J.; Mondo, S.J.; Nolan, M.; Ohm, R.A.; Pangilinan, J.; Park, H.J.; Ramírez, L.; Alfaro, M.; Sun, H.; Tritt, A.; …	32206138	Clathrospora_elynae	clathrospora_elynae_cbs_161.51	negative
Claviceps purpurea 20.1	Ascomycota	Sordariomycetes	Hypocreales	Clavicipitaceae	Ensembl/Fungi	GCA_000347355.1	02/07/2019	Schardl, C.L.; Young, C.A.; Hesse, U.; Amyotte, S.G.; Andreeva, K.; Calie, P.J.; Fleetwood, D.J.; Haws, D.C.; Moore, N.; Oeser, B.; Panaccione, D.G.; Schweri, K.K.; Voisey, C.R.; Farman, M.L.; Jaromczyk, J.W.; Roe, B.A.; O'Sullivan, D.M.; Scott, B.; Tudzynski, P.; An, Z.; Arnaoudova, E.G.; Bullock, C.T.; Charlton, N.D.; Chen, L.; Cox, M.; Dinkins, R.D.; Florea, S.; Glenn, A.E.; Gordon, A.; Gülden…	23468653	Claviceps_purpurea_20.1	claviceps_purpurea_20_1_gca_000347355	negative
Clavispora lusitaniae ATCC 42720	Ascomycota	Saccharomycetes	Saccharomycetales	Metschnikowiaceae	NCBI/RefSeq	GCF_000003835.1	01/06/2019	Butler, G.; Rasmussen, M.D.; Lin, M.F.; Santos, M.A.; Sakthikumar, S.; Munro, C.A.; Rheinbay, E.; Grabherr, M.; Forche, A.; Reedy, J.L.; Agrafioti, I.; Arnaud, M.B.; Bates, S.; Brown, A.J.; Brunke, S.; Costanzo, M.C.; Fitzpatrick, D.A.; de Groot, P.W.; Harris, D.; Hoyer, L.L.; Hube, B.; Klis, F.M.; Kodira, C.; Lennard, N.; Logue, M.E.; Martin, R.; Neiman, A.M.; Nikolaou, E.; Quail, M.A.; Quinn, J…	19465905	Clavispora_lusitaniae_ATCC_42720	Clavispora_lusitaniae	negative
Clohesyomyces aquaticus	Ascomycota	Dothideomycetes	Pleosporales	Lindgomycetaceae	Ensembl/Fungi	GCA_002105025.1	02/07/2019	Mondo, S.J.; Dannebaum, R.O.; Kuo, R.C.; Louie, K.B.; Bewick, A.J.; LaButti, K.; Haridas, S.; Kuo, A.; Salamov, A.; Ahrendt, S.R.; Lau, R.; Bowen, B.P.; Lipzen, A.; Sullivan, W.; Andreopoulos, B.B.; Clum, A.; Lindquist, E.; Daum, C.; Northen, T.R.; Kunde-Ramamoorthy, G.; Schmitz, R.J.; Gryganskyi, A.; Culley, D.; Magnuson, J.; James, T.Y.; O'Malley, M.A.; Stajich, J.E.; Spatafora, J.W.; Visel, A.…	28481340	Clohesyomyces_aquaticus	clohesyomyces_aquaticus_gca_002105025	negative
Coccidioides immitis RS	Ascomycota	Eurotiomycetes	Onygenales		Ensembl/Fungi	GCA_000149335.2	02/07/2019	Sharpton, T.J.; Stajich, J.E.; Rounsley, S.D.; Gardner, M.J.; Wortman, J.R.; Jordar, V.S.; Maiti, R.; Kodira, C.D.; Neafsey, D.E.; Zeng, Q.; Hung, C.Y.; McMahan, C.; Muszewska, A.; Grynberg, M.; Mandel, M.A.; Kellner, E.M.; Barker, B.M.; Galgiani, J.N.; Orbach, M.J.; Kirkland, T.N.; Cole, G.T.; Henn, M.R.; Birren, B.W.; Taylor, J.W. Comparative genomic analyses of the human fungal pathogens Cocci…	19717792	Coccidioides_immitis_RS	coccidioides_immitis_rs_gca_000149335	negative
Coccidioides posadasii str. Silveira	Ascomycota	Eurotiomycetes	Onygenales		Ensembl/Fungi	GCA_000170175.2	02/07/2019	Neafsey, D.E.; Barker, B.M.; Sharpton, T.J.; Stajich, J.E.; Park, D.J.; Whiston, E.; Hung, C.Y.; McMahan, C.; White, J.; Sykes, S.; Heiman, D.; Young, S.; Zeng, Q.; Abouelleil, A.; Aftuck, L.; Bessette, D.; Brown, A.; FitzGerald, M.; Lui, A.; Macdonald, J.P.; Priest, M.; Orbach, M.J.; Galgiani, J.N.; Kirkland, T.N.; Cole, G.T.; Birren, B.W.; Henn, M.R.; Taylor, J.W.; Rounsley, S.D. Population gen…	20516208	Coccidioides_posadasii_str._Silveira	coccidioides_posadasii_str_silveira_gca_000170175	negative
Coemansia reversa NRRL 1564	Zoopagomycota	Kickxellomycetes	Kickxellales	Kickxellaceae	NCBI/GenBank	GCA_002705745.1	01/07/2019	Chang, Y.; Wang, S.; Sekimoto, S.; Aerts, A.L.; Choi, C.; Clum, A.; LaButti, K.M.; Lindquist, E.A.; Yee Ngan, C.; Ohm, R.A.; Salamov, A.A.; Grigoriev, I.V.; Spatafora, J.W.; Berbee, M.L. Phylogenomic Analyses Indicate that Early Fungi Evolved Digesting Cell Walls of Algal Ancestors of Land Plants. 2015, Genome Biol Evol 7(6):1590-601	25977457	Coemansia_reversa_NRRL_1564	Coemansia_reversa	negative
Coleophoma crateriformis	Ascomycota	Leotiomycetes	Helotiales		NCBI/GenBank	GCA_003369635.1	01/07/2019	Wingfield, B.D.; Bills, G.F.; Dong, Y.; Huang, W.; Nel, W.J.; Swalarsk-Parry, B.S.; Vaghefi, N.; Wilken, P.M.; An, Z.; de Beer, Z.W.; De Vos, L.; Chen, L.; Duong, T.A.; Gao, Y.; Hammerbacher, A.; Kikkert, J.R.; Li, Y.; Li, H.; Li, K.; Li, Q.; Liu, X.; Ma, X.; Naidoo, K.; Pethybridge, S.J.; Sun, J.; Steenkamp, E.T.; van der Nest, M.A.; van Wyk, S.; Wingfield, M.J.; Xiong, C.; Yue, Q.; Zhang, X. IM…	30018880	Coleophoma_crateriformis	Coleophoma_crateriformis	negative
Coleophoma cylindrospora	Ascomycota	Leotiomycetes	Helotiales		NCBI/GenBank	GCA_003369665.1	01/07/2019	Wingfield, B.D.; Bills, G.F.; Dong, Y.; Huang, W.; Nel, W.J.; Swalarsk-Parry, B.S.; Vaghefi, N.; Wilken, P.M.; An, Z.; de Beer, Z.W.; De Vos, L.; Chen, L.; Duong, T.A.; Gao, Y.; Hammerbacher, A.; Kikkert, J.R.; Li, Y.; Li, H.; Li, K.; Li, Q.; Liu, X.; Ma, X.; Naidoo, K.; Pethybridge, S.J.; Sun, J.; Steenkamp, E.T.; van der Nest, M.A.; van Wyk, S.; Wingfield, M.J.; Xiong, C.; Yue, Q.; Zhang, X. IM…	30018880	Coleophoma_cylindrospora	Coleophoma_cylindrospora	negative
Colletotrichum chlorophyti	Ascomycota	Sordariomycetes	Glomerellales	Glomerellaceae	Ensembl/Fungi	GCA_001937105.1	02/07/2019	Gan, P.; Narusaka, M.; Tsushima, A.; Narusaka, Y.; Takano, Y.; Shirasu, K. Draft Genome Assembly of <i>Colletotrichum chlorophyti</i>, a Pathogen of Herbaceous Plants. 2017, Genome Announc 5(10):None	28280027	Colletotrichum_chlorophyti	colletotrichum_chlorophyti_gca_001937105	positive
Colletotrichum fioriniae PJ7	Ascomycota	Sordariomycetes	Glomerellales	Glomerellaceae	Ensembl/Fungi	GCA_000582985.1	02/07/2019	Baroncelli, R.; Sreenivasaprasad, S.; Sukno, S.A.; Thon, M.R.; Holub, E. Draft Genome Sequence of Colletotrichum acutatum Sensu Lato (Colletotrichum fioriniae). 2014, Genome Announc 2(2):None	24723700	Colletotrichum_fioriniae_PJ7	colletotrichum_fioriniae_pj7_gca_000582985	positive
Colletotrichum fructicola Nara gc5	Ascomycota	Sordariomycetes	Glomerellales	Glomerellaceae	Ensembl/Fungi	GCA_000319635.1	02/07/2019	Gan, P.; Ikeda, K.; Irieda, H.; Narusaka, M.; O'Connell, R.J.; Narusaka, Y.; Takano, Y.; Kubo, Y.; Shirasu, K. Comparative genomic and transcriptomic analyses reveal the hemibiotrophic stage shift of Colletotrichum fungi. 2013, New Phytol 197(4):1236-1249	23252678	Colletotrichum_fructicola_Nara_gc5	colletotrichum_gloeosporioides	negative
Colletotrichum gloeosporioides Cg-14	Ascomycota	Sordariomycetes	Glomerellales	Glomerellaceae	JGI/Mycocosm	Colgl1	20/04/2021	Alkan, N.; Meng, X.; Friedlander, G.; Reuveni, E.; Sukno, S.; Sherman, A.; Thon, M.; Fluhr, R.; Prusky, D. Global aspects of pacC regulation of pathogenicity genes in Colletotrichum gloeosporioides as revealed by transcriptome analysis. 2013, Mol Plant Microbe Interact 26(11):1345-58	23902260	Colletotrichum_gloeosporioides_Cg-14	colletotrichum_gloeosporioides_cg-14	negative
Colletotrichum graminicola M1.001	Ascomycota	Sordariomycetes	Glomerellales	Glomerellaceae	Ensembl/Fungi	GCA_000149035.1	02/07/2019	O'Connell, R.J.; Thon, M.R.; Hacquard, S.; Amyotte, S.G.; Kleemann, J.; Torres, M.F.; Damm, U.; Buiate, E.A.; Epstein, L.; Alkan, N.; Altmüller, J.; Alvarado-Balderrama, L.; Bauser, C.A.; Becker, C.; Birren, B.W.; Chen, Z.; Choi, J.; Crouch, J.A.; Duvick, J.P.; Farman, M.A.; Gan, P.; Heiman, D.; Henrissat, B.; Howard, R.J.; Kabbage, M.; Koch, C.; Kracher, B.; Kubo, Y.; Law, A.D.; Lebrun, M.H.; Le…	22885923	Colletotrichum_graminicola_M1.001	colletotrichum_graminicola	positive
Colletotrichum higginsianum IMI 349063	Ascomycota	Sordariomycetes	Glomerellales	Glomerellaceae	NCBI/RefSeq	GCF_001672515.1	01/06/2019	O'Connell, R.J.; Thon, M.R.; Hacquard, S.; Amyotte, S.G.; Kleemann, J.; Torres, M.F.; Damm, U.; Buiate, E.A.; Epstein, L.; Alkan, N.; Altmüller, J.; Alvarado-Balderrama, L.; Bauser, C.A.; Becker, C.; Birren, B.W.; Chen, Z.; Choi, J.; Crouch, J.A.; Duvick, J.P.; Farman, M.A.; Gan, P.; Heiman, D.; Henrissat, B.; Howard, R.J.; Kabbage, M.; Koch, C.; Kracher, B.; Kubo, Y.; Law, A.D.; Lebrun, M.H.; Le…	22885923	Colletotrichum_higginsianum_IMI_349063	Colletotrichum_higginsianum	positive
Colletotrichum incanum	Ascomycota	Sordariomycetes	Glomerellales	Glomerellaceae	Ensembl/Fungi	GCA_001855235.1	02/07/2019	Gan, P.; Narusaka, M.; Kumakura, N.; Tsushima, A.; Takano, Y.; Narusaka, Y.; Shirasu, K. Genus-Wide Comparative Genome Analyses of Colletotrichum Species Reveal Specific Gene Family Losses and Gains during Adaptation to Specific Infection Lifestyles. 2016, Genome Biol Evol 8(5):1467-81	27189990	Colletotrichum_incanum	colletotrichum_incanum_gca_001855235	negative
Colletotrichum musicola	Ascomycota	Sordariomycetes	Glomerellales	Glomerellaceae	NCBI/GenBank	GCA_014235935.1	17/05/2021	Rogério, F.; Boufleur, T.R.; Ciampi-Guillardi, M.; Sukno, S.A.; Thon, M.R.; Massola Júnior, N.S.; Baroncelli, R. Genome Sequence Resources of <i>Colletotrichum truncatum</i>, <i>C. plurivorum</i>, <i>C. musicola</i>, and <i>C. sojae</i>: Four Species Pathogenic to Soybean (<i>Glycine max</i>). 2020, Phytopathology 110(9):1497-1499	32352862	Colletotrichum_musicola	Colletotrichum_musicola	positive
Colletotrichum nymphaeae SA-01	Ascomycota	Sordariomycetes	Glomerellales	Glomerellaceae	Ensembl/Fungi	GCA_001563115.1	02/07/2019	Baroncelli, R.; Amby, D.B.; Zapparata, A.; Sarrocco, S.; Vannacci, G.; Le Floch, G.; Harrison, R.J.; Holub, E.; Sukno, S.A.; Sreenivasaprasad, S.; Thon, M.R. Gene family expansions and contractions are associated with host range in plant pathogens of the genus Colletotrichum. 2016, BMC Genomics 17(None):555	27496087	Colletotrichum_nymphaeae_SA-01	colletotrichum_nymphaeae_sa_01_gca_001563115	negative
Colletotrichum orbiculare MAFF 240422	Ascomycota	Sordariomycetes	Glomerellales	Glomerellaceae	Ensembl/Fungi	GCA_000350065.1	02/07/2019	Gan, P.; Ikeda, K.; Irieda, H.; Narusaka, M.; O'Connell, R.J.; Narusaka, Y.; Takano, Y.; Kubo, Y.; Shirasu, K. Comparative genomic and transcriptomic analyses reveal the hemibiotrophic stage shift of Colletotrichum fungi. 2013, New Phytol 197(4):1236-1249	23252678	Colletotrichum_orbiculare_MAFF_240422	colletotrichum_orbiculare	positive
Colletotrichum orchidophilum	Ascomycota	Sordariomycetes	Glomerellales	Glomerellaceae	Ensembl/Fungi	GCA_001831195.1	02/07/2019	Baroncelli, R.; Sukno, S.A.; Sarrocco, S.; Cafà, G.; Le Floch, G.; Thon, M.R. Whole-Genome Sequence of the Orchid Anthracnose Pathogen Colletotrichum orchidophilum. 2018, Mol Plant Microbe Interact 31(10):979-981	29649963	Colletotrichum_orchidophilum	colletotrichum_orchidophilum_gca_001831195	positive
Colletotrichum plurivorum	Ascomycota	Sordariomycetes	Glomerellales	Glomerellaceae	NCBI/GenBank	GCA_014235945.1	17/05/2021	Rogério, F.; Boufleur, T.R.; Ciampi-Guillardi, M.; Sukno, S.A.; Thon, M.R.; Massola Júnior, N.S.; Baroncelli, R. Genome Sequence Resources of <i>Colletotrichum truncatum</i>, <i>C. plurivorum</i>, <i>C. musicola</i>, and <i>C. sojae</i>: Four Species Pathogenic to Soybean (<i>Glycine max</i>). 2020, Phytopathology 110(9):1497-1499	32352862	Colletotrichum_plurivorum	Colletotrichum_plurivorum	negative
Colletotrichum salicis	Ascomycota	Sordariomycetes	Glomerellales	Glomerellaceae	Ensembl/Fungi	GCA_001563125.1	02/07/2019	Baroncelli, R.; Amby, D.B.; Zapparata, A.; Sarrocco, S.; Vannacci, G.; Le Floch, G.; Harrison, R.J.; Holub, E.; Sukno, S.A.; Sreenivasaprasad, S.; Thon, M.R. Gene family expansions and contractions are associated with host range in plant pathogens of the genus Colletotrichum. 2016, BMC Genomics 17(None):555	27496087	Colletotrichum_salicis	colletotrichum_salicis_gca_001563125	positive
Colletotrichum scovillei	Ascomycota	Sordariomycetes	Glomerellales	Glomerellaceae	NCBI/RefSeq	GCF_011075155.1	17/05/2021	Huo, J.; Wang, Y.; Hao, Y.; Yao, Y.; Wang, Y.; Zhang, K.; Tan, X.; Li, Z.; Wang, W. Genome Sequence Resource for <i>Colletotrichum scovillei</i>, the Cause of Anthracnose Disease of Chili. 2021, Mol Plant Microbe Interact 34(1):122-126	33006530	Colletotrichum_scovillei	Colletotrichum_scovillei	negative
Colletotrichum shisoi	Ascomycota	Sordariomycetes	Glomerellales	Glomerellaceae	NCBI/GenBank	GCA_006783085.1	17/05/2021	Gan, P.; Tsushima, A.; Hiroyama, R.; Narusaka, M.; Takano, Y.; Narusaka, Y.; Kawaradani, M.; Damm, U.; Shirasu, K. Colletotrichum shisoi sp. nov., an anthracnose pathogen of Perilla frutescens in Japan: molecular phylogenetic, morphological and genomic evidence. 2019, Sci Rep 9(1):13349	31527702	Colletotrichum_shisoi	Colletotrichum_shisoi	negative
Colletotrichum sidae	Ascomycota	Sordariomycetes	Glomerellales	Glomerellaceae	NCBI/GenBank	GCA_004367935.1	01/07/2019	Gan, P.; Tsushima, A.; Narusaka, M.; Narusaka, Y.; Takano, Y.; Kubo, Y.; Shirasu, K. Genome Sequence Resources for Four Phytopathogenic Fungi from the <i>Colletotrichum orbiculare</i> Species Complex. 2019, Mol Plant Microbe Interact 32(9):1088-1090	30893003	Colletotrichum_sidae	Colletotrichum_sidae	positive
Colletotrichum simmondsii	Ascomycota	Sordariomycetes	Glomerellales	Glomerellaceae	Ensembl/Fungi	GCA_001563135.1	02/07/2019	Baroncelli, R.; Amby, D.B.; Zapparata, A.; Sarrocco, S.; Vannacci, G.; Le Floch, G.; Harrison, R.J.; Holub, E.; Sukno, S.A.; Sreenivasaprasad, S.; Thon, M.R. Gene family expansions and contractions are associated with host range in plant pathogens of the genus Colletotrichum. 2016, BMC Genomics 17(None):555	27496087	Colletotrichum_simmondsii	colletotrichum_simmondsii_gca_001563135	positive
Colletotrichum sojae	Ascomycota	Sordariomycetes	Glomerellales	Glomerellaceae	NCBI/GenBank	GCA_014235955.1	17/05/2021	Rogério, F.; Boufleur, T.R.; Ciampi-Guillardi, M.; Sukno, S.A.; Thon, M.R.; Massola Júnior, N.S.; Baroncelli, R. Genome Sequence Resources of <i>Colletotrichum truncatum</i>, <i>C. plurivorum</i>, <i>C. musicola</i>, and <i>C. sojae</i>: Four Species Pathogenic to Soybean (<i>Glycine max</i>). 2020, Phytopathology 110(9):1497-1499	32352862	Colletotrichum_sojae	Colletotrichum_sojae	positive
Colletotrichum spinosum	Ascomycota	Sordariomycetes	Glomerellales	Glomerellaceae	NCBI/GenBank	GCA_004366825.1	01/07/2019	Gan, P.; Tsushima, A.; Narusaka, M.; Narusaka, Y.; Takano, Y.; Kubo, Y.; Shirasu, K. Genome Sequence Resources for Four Phytopathogenic Fungi from the <i>Colletotrichum orbiculare</i> Species Complex. 2019, Mol Plant Microbe Interact 32(9):1088-1090	30893003	Colletotrichum_spinosum	Colletotrichum_spinosum	positive
Colletotrichum sublineola	Ascomycota	Sordariomycetes	Glomerellales	Glomerellaceae	Ensembl/Fungi	GCA_000696135.1	02/07/2019	Baroncelli, R.; Sanz-Martín, J.M.; Rech, G.E.; Sukno, S.A.; Thon, M.R. Draft Genome Sequence of Colletotrichum sublineola, a Destructive Pathogen of Cultivated Sorghum. 2014, Genome Announc 2(3):None	24926053	Colletotrichum_sublineola	colletotrichum_sublineola_gca_000696135	positive
Colletotrichum tanaceti	Ascomycota	Sordariomycetes	Glomerellales	Glomerellaceae	NCBI/GenBank	GCA_005350895.1	01/07/2019	Lelwala, R.V.; Korhonen, P.K.; Young, N.D.; Scott, J.B.; Ades, P.K.; Gasser, R.B.; Taylor, P.W.J. Comparative genome analysis indicates high evolutionary potential of pathogenicity genes in Colletotrichum tanaceti. 2019, PLoS One 14(5):e0212248	31150449	Colletotrichum_tanaceti	Colletotrichum_tanaceti	negative
Colletotrichum tofieldiae	Ascomycota	Sordariomycetes	Glomerellales	Glomerellaceae	Ensembl/Fungi	GCA_001625265.1	02/07/2019	Hacquard, S.; Kracher, B.; Hiruma, K.; Münch, P.C.; Garrido-Oter, R.; Thon, M.R.; Weimann, A.; Damm, U.; Dallery, J.F.; Hainaut, M.; Henrissat, B.; Lespinet, O.; Sacristán, S.; Ver Loren van Themaat, E.; Kemen, E.; McHardy, A.C.; Schulze-Lefert, P.; O'Connell, R.J. Survival trade-offs in plant roots during colonization by closely related beneficial and pathogenic fungi. 2016, Nat Commun 7(None):1…	27150427	Colletotrichum_tofieldiae	colletotrichum_tofieldiae_gca_001625265	negative
Colletotrichum trifolii	Ascomycota	Sordariomycetes	Glomerellales	Glomerellaceae	NCBI/GenBank	GCA_004367215.1	01/07/2019	Gan, P.; Tsushima, A.; Narusaka, M.; Narusaka, Y.; Takano, Y.; Kubo, Y.; Shirasu, K. Genome Sequence Resources for Four Phytopathogenic Fungi from the <i>Colletotrichum orbiculare</i> Species Complex. 2019, Mol Plant Microbe Interact 32(9):1088-1090	30893003	Colletotrichum_trifolii	Colletotrichum_trifolii	positive
Colletotrichum truncatum	Ascomycota	Sordariomycetes	Glomerellales	Glomerellaceae	NCBI/RefSeq	GCF_014235925.1	17/05/2021	Rogério, F.; Boufleur, T.R.; Ciampi-Guillardi, M.; Sukno, S.A.; Thon, M.R.; Massola Júnior, N.S.; Baroncelli, R. Genome Sequence Resources of <i>Colletotrichum truncatum</i>, <i>C. plurivorum</i>, <i>C. musicola</i>, and <i>C. sojae</i>: Four Species Pathogenic to Soybean (<i>Glycine max</i>). 2020, Phytopathology 110(9):1497-1499	32352862	Colletotrichum_truncatum	Colletotrichum_truncatum	positive
Conidiobolus coronatus NRRL 28638	Zoopagomycota	Entomophthoromycetes	Entomophthorales	Ancylistaceae	Ensembl/Fungi	GCA_001566745.1	02/07/2019	Chang, Y.; Wang, S.; Sekimoto, S.; Aerts, A.L.; Choi, C.; Clum, A.; LaButti, K.M.; Lindquist, E.A.; Yee Ngan, C.; Ohm, R.A.; Salamov, A.A.; Grigoriev, I.V.; Spatafora, J.W.; Berbee, M.L. Phylogenomic Analyses Indicate that Early Fungi Evolved Digesting Cell Walls of Algal Ancestors of Land Plants. 2015, Genome Biol Evol 7(6):1590-601	25977457	Conidiobolus_coronatus_NRRL_28638	conidiobolus_coronatus_nrrl_28638_gca_001566745	negative
Coniella lustricola	Ascomycota	Sordariomycetes	Diaporthales	Schizoparmaceae	Ensembl/Fungi	GCA_003019895.1	02/07/2019	Raudabaugh; D. B.; Iturriaga; T.; Carver; A.; Mondo; S.; Pangilinan; J.; Lipzen; A.; He; G.; Amirebrahimi; M.; Grigoriev; I. V.; & Miller; A. N. 2018. Coniella lustricola, a new species from submerged detritus. Mycological Progress; 17(1–2); 191–203.	http://doi:10.1007/s11557-017-1337-6	Coniella_lustricola	coniella_lustricola_gca_003019895	positive
Coniochaeta ligniaria NRRL 30616	Ascomycota	Sordariomycetes	Coniochaetales	Coniochaetaceae	Ensembl/Fungi	GCA_001879275.1	02/07/2019	Jiménez, D.J.; Hector, R.E.; Riley, R.; Lipzen, A.; Kuo, R.C.; Amirebrahimi, M.; Barry, K.W.; Grigoriev, I.V.; van Elsas, J.D.; Nichols, N.N. Draft Genome Sequence of Coniochaeta ligniaria NRRL 30616, a Lignocellulolytic Fungus for Bioabatement of Inhibitors in Plant Biomass Hydrolysates. 2017, Genome Announc 5(4):None	28126934	Coniochaeta_ligniaria_NRRL_30616	coniochaeta_ligniaria_nrrl_30616_gca_001879275	negative
Coniochaeta pulveracea	Ascomycota	Sordariomycetes	Coniochaetales	Coniochaetaceae	NCBI/GenBank	GCA_003635345.1	01/07/2019	Borstlap, C.J.; de Witt, R.N.; Botha, A.; Volschenk, H. Draft Genome Sequence of the Lignocellulose-Degrading Ascomycete <i>Coniochaeta p</i><i>ulveracea</i> CAB 683. 2019, Microbiol Resour Announc 8(1):None	30637394	Coniochaeta_pulveracea	Coniochaeta_pulveracea	negative
Coniochaeta sp. 2T2.1	Ascomycota	Sordariomycetes	Coniochaetales	Coniochaetaceae	JGI/Mycocosm	Conioc1	08/10/2019	Mondo, S.J.; Jiménez, D.J.; Hector, R.E.; Lipzen, A.; Yan, M.; LaButti, K.; Barry, K.; van Elsas, J.D.; Grigoriev, I.V.; Nichols, N.N. Genome expansion by allopolyploidization in the fungal strain <i>Coniochaeta</i> 2T2.1 and its exceptional lignocellulolytic machinery. 2019, Biotechnol Biofuels 12(None):229	31572496	Coniochaeta_sp._2T2.1	coniochaeta_sp._2t2.1	negative
Coniophora olivacea	Basidiomycota	Agaricomycetes	Boletales	Coniophoraceae	JGI/Mycocosm	Conol1	01/06/2019	Castanera, R.; Pérez, G.; López-Varas, L.; Amselem, J.; LaButti, K.; Singan, V.; Lipzen, A.; Haridas, S.; Barry, K.; Grigoriev, I.V.; Pisabarro, A.G.; Ramírez, L. Comparative genomics of Coniophora olivacea reveals different patterns of genome expansion in Boletales. 2017, BMC Genomics 18(1):883	29145801	Coniophora_olivacea	coniophora_olivacea_mucl_20566	negative
Coniophora puteana RWD-64-598 SS2	Basidiomycota	Agaricomycetes	Boletales	Coniophoraceae	NCBI/RefSeq	GCF_000271625.1	01/06/2019	Floudas, D.; Binder, M.; Riley, R.; Barry, K.; Blanchette, R.A.; Henrissat, B.; Martínez, A.T.; Otillar, R.; Spatafora, J.W.; Yadav, J.S.; Aerts, A.; Benoit, I.; Boyd, A.; Carlson, A.; Copeland, A.; Coutinho, P.M.; de Vries, R.P.; Ferreira, P.; Findley, K.; Foster, B.; Gaskell, J.; Glotzer, D.; Górecki, P.; Heitman, J.; Hesse, C.; Hori, C.; Igarashi, K.; Jurgens, J.A.; Kallen, N.; Kersten, P.; Ko…	22745431	Coniophora_puteana_RWD-64-598_SS2	Coniophora_puteana	negative
Coniosporium apollinis CBS 100218	Ascomycota	Dothideomycetes			Ensembl/Fungi	GCA_000281105.1	02/07/2019	Teixeira, M.M.; Moreno, L.F.; Stielow, B.J.; Muszewska, A.; Hainaut, M.; Gonzaga, L.; Abouelleil, A.; Patané, J.S.; Priest, M.; Souza, R.; Young, S.; Ferreira, K.S.; Zeng, Q.; da Cunha, M.M.; Gladki, A.; Barker, B.; Vicente, V.A.; de Souza, E.M.; Almeida, S.; Henrissat, B.; Vasconcelos, A.T.; Deng, S.; Voglmayr, H.; Moussa, T.A.; Gorbushina, A.; Felipe, M.S.; Cuomo, C.A.; de Hoog, G.S. Exploring …	28348446	Coniosporium_apollinis_CBS_100218	coniosporium_apollinis_cbs_100218_gca_000281105	negative
Coprinellus angulatus	Basidiomycota	Agaricomycetes	Agaricales	Psathyrellaceae	JGI/Mycocosm	Copang1	20/04/2021	Steindorff, A.S.; Carver, A.; Calhoun, S.; Stillman, K.; Liu, H.; Lipzen, A.; He, G.; Yan, M.; Pangilinan, J.; LaButti, K.; Ng, V.; Bruns, T.D.; Grigoriev, I.V. Comparative genomics of pyrophilous fungi reveals a link between fire events and developmental genes. 2021, Environ Microbiol 23(1):99-109	33034064	Coprinellus_angulatus	coprinellus_angulatus_cbs_144469	negative
Coprinellus micaceus	Basidiomycota	Agaricomycetes	Agaricales	Psathyrellaceae	NCBI/GenBank	GCA_004369175.1	01/07/2019	Varga, T.; Krizsán, K.; Földi, C.; Dima, B.; Sánchez-García, M.; Sánchez-Ramírez, S.; Szöllősi, G.J.; Szarkándi, J.G.; Papp, V.; Albert, L.; Andreopoulos, W.; Angelini, C.; Antonín, V.; Barry, K.W.; Bougher, N.L.; Buchanan, P.; Buyck, B.; Bense, V.; Catcheside, P.; Chovatia, M.; Cooper, J.; Dämon, W.; Desjardin, D.; Finy, P.; Geml, J.; Haridas, S.; Hughes, K.; Justo, A.; Karasiński, D.; Kautmanov…	30886374	Coprinellus_micaceus	Coprinellus_micaceus	negative
Coprinopsis cinerea okayama7#130	Basidiomycota	Agaricomycetes	Agaricales	Psathyrellaceae	Ensembl/Fungi	GCA_000182895.1	02/07/2019	Stajich, J.E.; Wilke, S.K.; Ahrén, D.; Au, C.H.; Birren, B.W.; Borodovsky, M.; Burns, C.; Canbäck, B.; Casselton, L.A.; Cheng, C.K.; Deng, J.; Dietrich, F.S.; Fargo, D.C.; Farman, M.L.; Gathman, A.C.; Goldberg, J.; Guigó, R.; Hoegger, P.J.; Hooker, J.B.; Huggins, A.; James, T.Y.; Kamada, T.; Kilaru, S.; Kodira, C.; Kües, U.; Kupfer, D.; Kwan, H.S.; Lomsadze, A.; Li, W.; Lilly, W.W.; Ma, L.J.; Mac…	20547848	Coprinopsis_cinerea_okayama7#130	coprinopsis_cinerea_okayama7_130_gca_000182895	negative
Coprinopsis marcescibilis	Basidiomycota	Agaricomycetes	Agaricales	Psathyrellaceae	NCBI/GenBank	GCA_004369085.1	01/07/2019	Varga, T.; Krizsán, K.; Földi, C.; Dima, B.; Sánchez-García, M.; Sánchez-Ramírez, S.; Szöllősi, G.J.; Szarkándi, J.G.; Papp, V.; Albert, L.; Andreopoulos, W.; Angelini, C.; Antonín, V.; Barry, K.W.; Bougher, N.L.; Buchanan, P.; Buyck, B.; Bense, V.; Catcheside, P.; Chovatia, M.; Cooper, J.; Dämon, W.; Desjardin, D.; Finy, P.; Geml, J.; Haridas, S.; Hughes, K.; Justo, A.; Karasiński, D.; Kautmanov…	30886374	Coprinopsis_marcescibilis	Coprinopsis_marcescibilis	negative
Cordyceps confragosa RCEF 1005	Ascomycota	Sordariomycetes	Hypocreales	Cordycipitaceae	Ensembl/Fungi	GCA_001636795.1	02/07/2019	Shang, Y.; Xiao, G.; Zheng, P.; Cen, K.; Zhan, S.; Wang, C. Divergent and Convergent Evolution of Fungal Pathogenicity. 2016, Genome Biol Evol 8(5):1374-87	27071652	Cordyceps_confragosa_RCEF_1005	cordyceps_confragosa_rcef_1005_gca_001636795	negative
Cordyceps fumosorosea ARSEF 2679	Ascomycota	Sordariomycetes	Hypocreales	Cordycipitaceae	Ensembl/Fungi	GCA_001636725.1	02/07/2019	Shang, Y.; Xiao, G.; Zheng, P.; Cen, K.; Zhan, S.; Wang, C. Divergent and Convergent Evolution of Fungal Pathogenicity. 2016, Genome Biol Evol 8(5):1374-87	27071652	Cordyceps_fumosorosea_ARSEF_2679	cordyceps_fumosorosea_arsef_2679_gca_001636725	negative
Cordyceps javanica	Ascomycota	Sordariomycetes	Hypocreales	Cordycipitaceae	NCBI/GenBank	GCA_006981975.1	17/05/2021	Lin, R.; Zhang, X.; Xin, B.; Zou, M.; Gao, Y.; Qin, F.; Hu, Q.; Xie, B.; Cheng, X. Genome sequence of Isaria javanica and comparative genome analysis insights into family S53 peptidase evolution in fungal entomopathogens. 2019, Appl Microbiol Biotechnol 103(17):7111-7128	31273397	Cordyceps_javanica	Cordyceps_javanica	negative
Cordyceps militaris CM01	Ascomycota	Sordariomycetes	Hypocreales	Cordycipitaceae	Ensembl/Fungi	GCA_000225605.1	02/07/2019	Zheng, P.; Xia, Y.; Xiao, G.; Xiong, C.; Hu, X.; Zhang, S.; Zheng, H.; Huang, Y.; Zhou, Y.; Wang, S.; Zhao, G.P.; Liu, X.; St Leger, R.J.; Wang, C. Genome sequence of the insect pathogenic fungus Cordyceps militaris, a valued traditional Chinese medicine. 2011, Genome Biol 12(11):R116	22112802	Cordyceps_militaris_CM01	cordyceps_militaris_cm01_gca_000225605	negative
Cordyceps sp. RAO-2017	Ascomycota	Sordariomycetes	Hypocreales	Cordycipitaceae	JGI/Mycocosm	CorRAO_2017_1	20/04/2021	de Bekker, C.; Ohm, R.A.; Evans, H.C.; Brachmann, A.; Hughes, D.P. Ant-infecting Ophiocordyceps genomes reveal a high diversity of potential behavioral manipulation genes and a possible major role for enterotoxins. 2017, Sci Rep 7(1):12508	28970504	Cordyceps_sp._RAO-2017	cordyceps_sp._rao_2017	negative
Cortinarius glaucopus AT 2004 276	Basidiomycota	Agaricomycetes	Agaricales	Cortinariaceae	JGI/Mycocosm	None	20/04/2021	Miyauchi, S.; Kiss, E.; Kuo, A.; Drula, E.; Kohler, A.; Sánchez-García, M.; Morin, E.; Andreopoulos, B.; Barry, K.W.; Bonito, G.; Buée, M.; Carver, A.; Chen, C.; Cichocki, N.; Clum, A.; Culley, D.; Crous, P.W.; Fauchery, L.; Girlanda, M.; Hayes, R.D.; Kéri, Z.; LaButti, K.; Lipzen, A.; Lombard, V.; Magnuson, J.; Maillard, F.; Murat, C.; Nolan, M.; Ohm, R.A.; Pangilinan, J.; Pereira, M.F.; Perotto…	33046698	Cortinarius_glaucopus_AT_2004_276	cortinarius_glaucopus_at_2004_276	negative
Corynespora cassiicola Philippines	Ascomycota	Dothideomycetes	Pleosporales	Corynesporascaceae	Ensembl/Fungi	GCA_003016335.1	02/07/2019	Lopez, D.; Ribeiro, S.; Label, P.; Fumanal, B.; Venisse, J.S.; Kohler, A.; de Oliveira, R.R.; Labutti, K.; Lipzen, A.; Lail, K.; Bauer, D.; Ohm, R.A.; Barry, K.W.; Spatafora, J.; Grigoriev, I.V.; Martin, F.M.; Pujade-Renaud, V. Genome-Wide Analysis of <i>Corynespora cassiicola</i> Leaf Fall Disease Putative Effectors. 2018, Front Microbiol 9(None):276	29551995	Corynespora_cassiicola_Philippines	corynespora_cassiicola_philippines_gca_003016335	positive
Crassisporium funariophilum	Basidiomycota	Agaricomycetes	Agaricales	Crassisporiaceae	JGI/Mycocosm	Crafun1	20/04/2021	Steindorff, A.S.; Carver, A.; Calhoun, S.; Stillman, K.; Liu, H.; Lipzen, A.; He, G.; Yan, M.; Pangilinan, J.; LaButti, K.; Ng, V.; Bruns, T.D.; Grigoriev, I.V. Comparative genomics of pyrophilous fungi reveals a link between fire events and developmental genes. 2021, Environ Microbiol 23(1):99-109	33034064	Crassisporium_funariophilum	crassisporium_funariophilum_cbs_144457	negative
Crepidotus variabilis	Basidiomycota	Agaricomycetes	Agaricales	Crepidotaceae	JGI/Mycocosm	Crevar1	20/04/2021	Ruiz-Dueñas, F.J.; Barrasa, J.M.; Sánchez-García, M.; Camarero, S.; Miyauchi, S.; Serrano, A.; Linde, D.; Babiker, R.; Drula, E.; Ayuso-Fernández, I.; Pacheco, R.; Padilla, G.; Ferreira, P.; Barriuso, J.; Kellner, H.; Castanera, R.; Alfaro, M.; Ramírez, L.; Pisabarro, A.G.; Riley, R.; Kuo, A.; Andreopoulos, W.; LaButti, K.; Pangilinan, J.; Tritt, A.; Lipzen, A.; He, G.; Yan, M.; Ng, V.; Grigoriev…	33211093	Crepidotus_variabilis	crepidotus_variabilis_cbs_506.95	negative
Cronartium quercuum f. sp. fusiforme G11	Basidiomycota	Pucciniomycetes	Pucciniales	Cronartiaceae	JGI/Mycocosm	Croqu1	01/06/2019	Pendleton, A.L.; Smith, K.E.; Feau, N.; Martin, F.M.; Grigoriev, I.V.; Hamelin, R.; Nelson, C.D.; Burleigh, J.G.; Davis, J.M. Duplications and losses in gene families of rust pathogens highlight putative effectors. 2014, Front Plant Sci 5(None):299	25018762	Cronartium_quercuum_f._sp._fusiforme_G11	cronartium_quercuum_f._sp._fusiforme_g11	negative
Crucibulum laeve	Basidiomycota	Agaricomycetes	Agaricales	Nidulariaceae	NCBI/GenBank	GCA_004379715.1	01/07/2019	Varga, T.; Krizsán, K.; Földi, C.; Dima, B.; Sánchez-García, M.; Sánchez-Ramírez, S.; Szöllősi, G.J.; Szarkándi, J.G.; Papp, V.; Albert, L.; Andreopoulos, W.; Angelini, C.; Antonín, V.; Barry, K.W.; Bougher, N.L.; Buchanan, P.; Buyck, B.; Bense, V.; Catcheside, P.; Chovatia, M.; Cooper, J.; Dämon, W.; Desjardin, D.; Finy, P.; Geml, J.; Haridas, S.; Hughes, K.; Justo, A.; Karasiński, D.; Kautmanov…	30886374	Crucibulum_laeve	Crucibulum_laeve	negative
Cryphonectria parasitica EP155	Ascomycota	Sordariomycetes	Diaporthales	Cryphonectriaceae	JGI/Mycocosm	Crypa2	20/04/2021	Crouch, J.A.; Dawe, A.; Aerts, A.; Barry, K.; Churchill, A.C.L.; Grimwood, J.; Hillman, B.I.; Milgroom, M.G.; Pangilinan, J.; Smith, M.; Salamov, A.; Schmutz, J.; Yadav, J.S.; Grigoriev, I.V.; Nuss, D.L. Genome Sequence of the Chestnut Blight Fungus <i>Cryphonectria parasitica</i> EP155: A Fundamental Resource for an Archetypical Invasive Plant Pathogen. 2020, Phytopathology 110(6):1180-1188	32207662	Cryphonectria_parasitica_EP155	cryphonectria_parasitica_ep155	positive
Cryptococcus amylolentus CBS 6039	Basidiomycota	Tremellomycetes	Tremellales	Cryptococcaceae	Ensembl/Fungi	GCA_001720205.1	02/07/2019	Sun, S.; Yadav, V.; Billmyre, R.B.; Cuomo, C.A.; Nowrousian, M.; Wang, L.; Souciet, J.L.; Boekhout, T.; Porcel, B.; Wincker, P.; Granek, J.A.; Sanyal, K.; Heitman, J. Fungal genome and mating system transitions facilitated by chromosomal translocations involving intercentromeric recombination. 2017, PLoS Biol 15(8):e2002527	28800596	Cryptococcus_amylolentus_CBS_6039	cryptococcus_amylolentus_cbs_6039_gca_001720205	negative
Cryptococcus gattii CA1873	Basidiomycota	Tremellomycetes	Tremellales	Cryptococcaceae	JGI/Mycocosm	CgaCA1873_1	20/04/2021	Farrer, R.A.; Desjardins, C.A.; Sakthikumar, S.; Gujja, S.; Saif, S.; Zeng, Q.; Chen, Y.; Voelz, K.; Heitman, J.; May, R.C.; Fisher, M.C.; Cuomo, C.A. Genome Evolution and Innovation across the Four Major Lineages of Cryptococcus gattii. 2015, mBio 6(5):e00868-15	26330512	Cryptococcus_gattii_CA1873	cryptococcus_gattii_ca1873	negative
Cryptococcus gattii VGII R265	Basidiomycota	Tremellomycetes	Tremellales	Cryptococcaceae	Ensembl/Fungi	GCA_000149475.3	02/07/2019	D'Souza, C.A.; Kronstad, J.W.; Taylor, G.; Warren, R.; Yuen, M.; Hu, G.; Jung, W.H.; Sham, A.; Kidd, S.E.; Tangen, K.; Lee, N.; Zeilmaker, T.; Sawkins, J.; McVicker, G.; Shah, S.; Gnerre, S.; Griggs, A.; Zeng, Q.; Bartlett, K.; Li, W.; Wang, X.; Heitman, J.; Stajich, J.E.; Fraser, J.A.; Meyer, W.; Carter, D.; Schein, J.; Krzywinski, M.; Kwon-Chung, K.J.; Varma, A.; Wang, J.; Brunham, R.; Fyfe, M.…	21304167	Cryptococcus_gattii_VGII_R265	cryptococcus_gattii_vgii_r265_gca_000149475	negative
Cryptococcus gattii VGIV IND107	Basidiomycota	Tremellomycetes	Tremellales	Cryptococcaceae	Ensembl/Fungi	GCA_000835755.1	02/07/2019	Chen, Y.; Farrer, R.A.; Giamberardino, C.; Sakthikumar, S.; Jones, A.; Yang, T.; Tenor, J.L.; Wagih, O.; Van Wyk, M.; Govender, N.P.; Mitchell, T.G.; Litvintseva, A.P.; Cuomo, C.A.; Perfect, J.R. Microevolution of Serial Clinical Isolates of <i>Cryptococcus neoformans</i> var. <i>grubii</i> and <i>C. gattii</i>. 2017, mBio 8(2):None	28270580	Cryptococcus_gattii_VGIV_IND107	cryptococcus_gattii_vgiv_ind107_gca_000835755	negative
Cryptococcus gattii WM276	Basidiomycota	Tremellomycetes	Tremellales	Cryptococcaceae	NCBI/RefSeq	GCF_000185945.1	01/06/2019	D'Souza, C.A.; Kronstad, J.W.; Taylor, G.; Warren, R.; Yuen, M.; Hu, G.; Jung, W.H.; Sham, A.; Kidd, S.E.; Tangen, K.; Lee, N.; Zeilmaker, T.; Sawkins, J.; McVicker, G.; Shah, S.; Gnerre, S.; Griggs, A.; Zeng, Q.; Bartlett, K.; Li, W.; Wang, X.; Heitman, J.; Stajich, J.E.; Fraser, J.A.; Meyer, W.; Carter, D.; Schein, J.; Krzywinski, M.; Kwon-Chung, K.J.; Varma, A.; Wang, J.; Brunham, R.; Fyfe, M.…	21304167	Cryptococcus_gattii_WM276	Cryptococcus_gattii_VGI	negative
Cryptococcus neoformans var. neoformans JEC21	Basidiomycota	Tremellomycetes	Tremellales	Cryptococcaceae	Ensembl/Fungi	GCA_000091045.1	02/07/2019	Loftus, B.J.; Fung, E.; Roncaglia, P.; Rowley, D.; Amedeo, P.; Bruno, D.; Vamathevan, J.; Miranda, M.; Anderson, I.J.; Fraser, J.A.; Allen, J.E.; Bosdet, I.E.; Brent, M.R.; Chiu, R.; Doering, T.L.; Donlin, M.J.; D'Souza, C.A.; Fox, D.S.; Grinberg, V.; Fu, J.; Fukushima, M.; Haas, B.J.; Huang, J.C.; Janbon, G.; Jones, S.J.; Koo, H.L.; Krzywinski, M.I.; Kwon-Chung, J.K.; Lengeler, K.B.; Maiti, R.; …	15653466	Cryptococcus_neoformans_var._neoformans_JEC21	cryptococcus_neoformans	negative
Cryptococcus wingfieldii CBS 7118	Basidiomycota	Tremellomycetes	Tremellales	Cryptococcaceae	JGI/Mycocosm	Tsuwi1	20/04/2021	Passer, A.R.; Coelho, M.A.; Billmyre, R.B.; Nowrousian, M.; Mittelbach, M.; Yurkov, A.M.; Averette, A.F.; Cuomo, C.A.; Sun, S.; Heitman, J. Genetic and Genomic Analyses Reveal Boundaries between Species Closely Related to <i>Cryptococcus</i> Pathogens. 2019, mBio 10(3):None	31186317	Cryptococcus_wingfieldii_CBS_7118	cryptococcus_wingfieldii_cbs_7118	negative
Cucurbitaria berberidis CBS 394.84	Ascomycota	Dothideomycetes	Pleosporales	Cucurbitariaceae	JGI/Mycocosm	Cucbe1	20/04/2021	Haridas, S.; Albert, R.; Binder, M.; Bloem, J.; LaButti, K.; Salamov, A.; Andreopoulos, B.; Baker, S.E.; Barry, K.; Bills, G.; Bluhm, B.H.; Cannon, C.; Castanera, R.; Culley, D.E.; Daum, C.; Ezra, D.; González, J.B.; Henrissat, B.; Kuo, A.; Liang, C.; Lipzen, A.; Lutzoni, F.; Magnuson, J.; Mondo, S.J.; Nolan, M.; Ohm, R.A.; Pangilinan, J.; Park, H.J.; Ramírez, L.; Alfaro, M.; Sun, H.; Tritt, A.; …	32206138	Cucurbitaria_berberidis_CBS_394.84	cucurbitaria_berberidis_cbs_394.84	negative
Curvularia lunata m118	Ascomycota	Dothideomycetes	Pleosporales	Pleosporaceae	JGI/Mycocosm	Coclu2	01/06/2019	Gao, S.; Li, Y.; Gao, J.; Suo, Y.; Fu, K.; Li, Y.; Chen, J. Genome sequence and virulence variation-related transcriptome profiles of Curvularia lunata, an important maize pathogenic fungus. 2014, BMC Genomics 15(None):627	25056288	Curvularia_lunata_m118	cochliobolus_lunatus_m118	negative
Cutaneotrichosporon oleaginosum	Basidiomycota	Tremellomycetes	Trichosporonales	Trichosporonaceae	Ensembl/Fungi	GCA_001027345.1	02/07/2019	Kourist, R.; Bracharz, F.; Lorenzen, J.; Kracht, O.N.; Chovatia, M.; Daum, C.; Deshpande, S.; Lipzen, A.; Nolan, M.; Ohm, R.A.; Grigoriev, I.V.; Sun, S.; Heitman, J.; Brück, T.; Nowrousian, M. Genomics and Transcriptomics Analyses of the Oil-Accumulating Basidiomycete Yeast Trichosporon oleaginosus: Insights into Substrate Utilization and Alternative Evolutionary Trajectories of Fungal Mating Sys…	26199329	Cutaneotrichosporon_oleaginosum	cutaneotrichosporon_oleaginosum_gca_001027345	negative
Cyathus striatus	Basidiomycota	Agaricomycetes	Agaricales	Nidulariaceae	JGI/Mycocosm	Cyastr2	20/04/2021	Ruiz-Dueñas, F.J.; Barrasa, J.M.; Sánchez-García, M.; Camarero, S.; Miyauchi, S.; Serrano, A.; Linde, D.; Babiker, R.; Drula, E.; Ayuso-Fernández, I.; Pacheco, R.; Padilla, G.; Ferreira, P.; Barriuso, J.; Kellner, H.; Castanera, R.; Alfaro, M.; Ramírez, L.; Pisabarro, A.G.; Riley, R.; Kuo, A.; Andreopoulos, W.; LaButti, K.; Pangilinan, J.; Tritt, A.; Lipzen, A.; He, G.; Yan, M.; Ng, V.; Grigoriev…	33211093	Cyathus_striatus	cyathus_striatus_ah_40144	negative
Cyberlindnera fabianii	Ascomycota	Saccharomycetes	Saccharomycetales	Phaffomycetaceae	JGI/Mycocosm	Cybfa1	20/04/2021	van Rijswijck, I.M.; Derks, M.F.; Abee, T.; de Ridder, D.; Smid, E.J. Genome Sequences of <i>Cyberlindnera fabianii</i> 65, <i>Pichia kudriavzevii</i> 129, and <i>Saccharomyces cerevisiae</i> 131 Isolated from Fermented Masau Fruits in Zimbabwe. 2017, Genome Announc 5(14):None	28385833	Cyberlindnera_fabianii	cyberlindnera_fabianii_65	negative
Cyberlindnera jadinii NRRL Y-1542	Ascomycota	Saccharomycetes	Saccharomycetales	Phaffomycetaceae	Ensembl/Fungi	GCA_001661405.1	02/07/2019	Riley, R.; Haridas, S.; Wolfe, K.H.; Lopes, M.R.; Hittinger, C.T.; Göker, M.; Salamov, A.A.; Wisecaver, J.H.; Long, T.M.; Calvey, C.H.; Aerts, A.L.; Barry, K.W.; Choi, C.; Clum, A.; Coughlan, A.Y.; Deshpande, S.; Douglass, A.P.; Hanson, S.J.; Klenk, H.P.; LaButti, K.M.; Lapidus, A.; Lindquist, E.A.; Lipzen, A.M.; Meier-Kolthoff, J.P.; Ohm, R.A.; Otillar, R.P.; Pangilinan, J.L.; Peng, Y.; Rokas, A…	27535936	Cyberlindnera_jadinii_NRRL_Y-1542	cyberlindnera_jadinii_nrrl_y_1542_gca_001661405	negative
Cylindrobasidium torrendii FP15055 ss-10	Basidiomycota	Agaricomycetes	Agaricales	Physalacriaceae	Ensembl/Fungi	GCA_000934385.1	02/07/2019	Floudas, D.; Held, B.W.; Riley, R.; Nagy, L.G.; Koehler, G.; Ransdell, A.S.; Younus, H.; Chow, J.; Chiniquy, J.; Lipzen, A.; Tritt, A.; Sun, H.; Haridas, S.; LaButti, K.; Ohm, R.A.; Kües, U.; Blanchette, R.A.; Grigoriev, I.V.; Minto, R.E.; Hibbett, D.S. Evolution of novel wood decay mechanisms in Agaricales revealed by the genome sequences of Fistulina hepatica and Cylindrobasidium torrendii. 201…	25683379	Cylindrobasidium_torrendii_FP15055_ss-10	cylindrobasidium_torrendii_fp15055_ss_10_gca_000934385	negative
Cyphellophora europaea CBS 101466	Ascomycota	Eurotiomycetes	Chaetothyriales	Cyphellophoraceae	Ensembl/Fungi	GCA_000365145.2	02/07/2019	Teixeira, M.M.; Moreno, L.F.; Stielow, B.J.; Muszewska, A.; Hainaut, M.; Gonzaga, L.; Abouelleil, A.; Patané, J.S.; Priest, M.; Souza, R.; Young, S.; Ferreira, K.S.; Zeng, Q.; da Cunha, M.M.; Gladki, A.; Barker, B.; Vicente, V.A.; de Souza, E.M.; Almeida, S.; Henrissat, B.; Vasconcelos, A.T.; Deng, S.; Voglmayr, H.; Moussa, T.A.; Gorbushina, A.; Felipe, M.S.; Cuomo, C.A.; de Hoog, G.S. Exploring …	28348446	Cyphellophora_europaea_CBS_101466	cyphellophora_europaea_cbs_101466_gca_000365145	negative
Cystobasidium minutum MCA 4210	Basidiomycota	Cystobasidiomycetes	Cystobasidiales	Cystobasidiaceae	JGI/Mycocosm	Rhomi1	01/06/2019	Camiolo, S.; Toome-Heller, M.; Aime, M.C.; Haridas, S.; Grigoriev, I.V.; Porceddu, A.; Mannazzu, I. An analysis of codon bias in six red yeast species. 2019, Yeast 36(1):53-64	30264407	Cystobasidium_minutum_MCA_4210	cystobasidium_minutum_mca_4210	negative
Cytidiella melzeri	Basidiomycota	Agaricomycetes	Polyporales	Irpicaceae	JGI/Mycocosm	Cytmel1	20/04/2021	Hage, H.; Miyauchi, S.; Virágh, M.; Drula, E.; Min, B.; Chaduli, D.; Navarro, D.; Favel, A.; Norest, M.; Lesage-Meessen, L.; Bálint, B.; Merényi, Z.; de Eugenio, L.; Morin, E.; Martínez, A.T.; Baldrian, P.; Štursová, M.; Martínez, M.J.; Novotny, C.; Magnuson, J.K.; Spatafora, J.W.; Maurice, S.; Pangilinan, J.; Andreopoulos, W.; LaButti, K.; Hundley, H.; Na, H.; Kuo, A.; Barry, K.; Lipzen, A.; Hen…	33538380	Cytidiella_melzeri	cytidiella_melzeri_fp_102339	negative
Dacryopinax primogenitus	Basidiomycota	Dacrymycetes	Dacrymycetales	Dacrymycetaceae	Ensembl/Fungi	GCA_000292625.1	02/07/2019	Floudas, D.; Binder, M.; Riley, R.; Barry, K.; Blanchette, R.A.; Henrissat, B.; Martínez, A.T.; Otillar, R.; Spatafora, J.W.; Yadav, J.S.; Aerts, A.; Benoit, I.; Boyd, A.; Carlson, A.; Copeland, A.; Coutinho, P.M.; de Vries, R.P.; Ferreira, P.; Findley, K.; Foster, B.; Gaskell, J.; Glotzer, D.; Górecki, P.; Heitman, J.; Hesse, C.; Hori, C.; Igarashi, K.; Jurgens, J.A.; Kallen, N.; Kersten, P.; Ko…	22745431	Dacryopinax_primogenitus	dacryopinax_primogenitus_gca_000292625	negative
Dactylellina haptotyla CBS 200.50	Ascomycota	Orbiliomycetes	Orbiliales	Orbiliaceae	Ensembl/Fungi	GCA_000441935.1	02/07/2019	Meerupati, T.; Andersson, K.M.; Friman, E.; Kumar, D.; Tunlid, A.; Ahrén, D. Genomic mechanisms accounting for the adaptation to parasitism in nematode-trapping fungi. 2013, PLoS Genet 9(11):e1003909	24244185	Dactylellina_haptotyla_CBS_200.50	dactylellina_haptotyla_cbs_200_50_gca_000441935	negative
Daedalea quercina L-15889	Basidiomycota	Agaricomycetes	Polyporales	Fomitopsidaceae	Ensembl/Fungi	GCA_001632345.1	02/07/2019	Nagy, L.G.; Riley, R.; Tritt, A.; Adam, C.; Daum, C.; Floudas, D.; Sun, H.; Yadav, J.S.; Pangilinan, J.; Larsson, K.H.; Matsuura, K.; Barry, K.; Labutti, K.; Kuo, R.; Ohm, R.A.; Bhattacharya, S.S.; Shirouzu, T.; Yoshinaga, Y.; Martin, F.M.; Grigoriev, I.V.; Hibbett, D.S. Comparative Genomics of Early-Diverging Mushroom-Forming Fungi Provides Insights into the Origins of Lignocellulose Decay Capab…	26659563	Daedalea_quercina_L-15889	daedalea_quercina_l_15889_gca_001632345	negative
Daldinia sp. EC12	Ascomycota	Sordariomycetes	Xylariales	Hypoxylaceae	Ensembl/Fungi	GCA_002120325.1	02/07/2019	Wu, W.; Davis, R.W.; Tran-Gyamfi, M.B.; Kuo, A.; LaButti, K.; Mihaltcheva, S.; Hundley, H.; Chovatia, M.; Lindquist, E.; Barry, K.; Grigoriev, I.V.; Henrissat, B.; Gladden, J.M. Characterization of four endophytic fungi as potential consolidated bioprocessing hosts for conversion of lignocellulose into advanced biofuels. 2017, Appl Microbiol Biotechnol 101(6):2603-2618	28078400	Daldinia_sp._EC12	daldinia_sp_ec12_gca_002120325	negative
Debaryomyces fabryi	Ascomycota	Saccharomycetes	Saccharomycetales	Debaryomycetaceae	Ensembl/Fungi	GCA_001447935.1	02/07/2019	Tafer, H.; Sterflinger, K.; Lopandic, K. Draft Genome of Debaryomyces fabryi CBS 789T, Isolated from a Human Interdigital Mycotic Lesion. 2016, Genome Announc 4(1):None	26847909	Debaryomyces_fabryi	debaryomyces_fabryi_gca_001447935	negative
Debaryomyces hansenii CBS767	Ascomycota	Saccharomycetes	Saccharomycetales	Debaryomycetaceae	Ensembl/Fungi	GCA_000006445.2	02/07/2019	Dujon, B.; Sherman, D.; Fischer, G.; Durrens, P.; Casaregola, S.; Lafontaine, I.; De Montigny, J.; Marck, C.; Neuvéglise, C.; Talla, E.; Goffard, N.; Frangeul, L.; Aigle, M.; Anthouard, V.; Babour, A.; Barbe, V.; Barnay, S.; Blanchin, S.; Beckerich, J.M.; Beyne, E.; Bleykasten, C.; Boisramé, A.; Boyer, J.; Cattolico, L.; Confanioleri, F.; De Daruvar, A.; Despons, L.; Fabre, E.; Fairhead, C.; Ferr…	15229592	Debaryomyces_hansenii_CBS767	debaryomyces_hansenii_cbs767_gca_000006445	negative
Decorospora gaudefroyi	Ascomycota	Dothideomycetes	Pleosporales	Pleosporaceae	JGI/Mycocosm	Decga1	20/04/2021	Haridas, S.; Albert, R.; Binder, M.; Bloem, J.; LaButti, K.; Salamov, A.; Andreopoulos, B.; Baker, S.E.; Barry, K.; Bills, G.; Bluhm, B.H.; Cannon, C.; Castanera, R.; Culley, D.E.; Daum, C.; Ezra, D.; González, J.B.; Henrissat, B.; Kuo, A.; Liang, C.; Lipzen, A.; Lutzoni, F.; Magnuson, J.; Mondo, S.J.; Nolan, M.; Ohm, R.A.; Pangilinan, J.; Park, H.J.; Ramírez, L.; Alfaro, M.; Sun, H.; Tritt, A.; …	32206138	Decorospora_gaudefroyi	decorospora_gaudefroyi	negative
Delitschia confertaspora ATCC 74209	Ascomycota	Dothideomycetes	Pleosporales	Delitschiaceae	JGI/Mycocosm	Delco1	20/04/2021	Haridas, S.; Albert, R.; Binder, M.; Bloem, J.; LaButti, K.; Salamov, A.; Andreopoulos, B.; Baker, S.E.; Barry, K.; Bills, G.; Bluhm, B.H.; Cannon, C.; Castanera, R.; Culley, D.E.; Daum, C.; Ezra, D.; González, J.B.; Henrissat, B.; Kuo, A.; Liang, C.; Lipzen, A.; Lutzoni, F.; Magnuson, J.; Mondo, S.J.; Nolan, M.; Ohm, R.A.; Pangilinan, J.; Park, H.J.; Ramírez, L.; Alfaro, M.; Sun, H.; Tritt, A.; …	32206138	Delitschia_confertaspora_ATCC_74209	delitschia_confertaspora_atcc_74209	negative
Delphinella strobiligena	Ascomycota	Dothideomycetes	Dothideales	Dothioraceae	JGI/Mycocosm	Delst1	20/04/2021	Haridas, S.; Albert, R.; Binder, M.; Bloem, J.; LaButti, K.; Salamov, A.; Andreopoulos, B.; Baker, S.E.; Barry, K.; Bills, G.; Bluhm, B.H.; Cannon, C.; Castanera, R.; Culley, D.E.; Daum, C.; Ezra, D.; González, J.B.; Henrissat, B.; Kuo, A.; Liang, C.; Lipzen, A.; Lutzoni, F.; Magnuson, J.; Mondo, S.J.; Nolan, M.; Ohm, R.A.; Pangilinan, J.; Park, H.J.; Ramírez, L.; Alfaro, M.; Sun, H.; Tritt, A.; …	32206138	Delphinella_strobiligena	delphinella_strobiligena_cbs_735.71	negative
Dendrothele bispora CBS 962.96	Basidiomycota	Agaricomycetes	Agaricales		NCBI/GenBank	GCA_004369135.1	01/07/2019	Varga, T.; Krizsán, K.; Földi, C.; Dima, B.; Sánchez-García, M.; Sánchez-Ramírez, S.; Szöllősi, G.J.; Szarkándi, J.G.; Papp, V.; Albert, L.; Andreopoulos, W.; Angelini, C.; Antonín, V.; Barry, K.W.; Bougher, N.L.; Buchanan, P.; Buyck, B.; Bense, V.; Catcheside, P.; Chovatia, M.; Cooper, J.; Dämon, W.; Desjardin, D.; Finy, P.; Geml, J.; Haridas, S.; Hughes, K.; Justo, A.; Karasiński, D.; Kautmanov…	30886374	Dendrothele_bispora_CBS_962.96	Dendrothele_bispora	negative
Dentipellis sp. KUC8613	Basidiomycota	Agaricomycetes	Russulales	Hericiaceae	JGI/Mycocosm	Densp1	08/10/2019	Park, H.; Min, B.; Jang, Y.; Kim, J.; Lipzen, A.; Sharma, A.; Andreopoulos, B.; Johnson, J.; Riley, R.; Spatafora, J.W.; Henrissat, B.; Kim, K.H.; Grigoriev, I.V.; Kim, J.J.; Choi, I.G. Comprehensive genomic and transcriptomic analysis of polycyclic aromatic hydrocarbon degradation by a mycoremediation fungus, Dentipellis sp. KUC8613. 2019, Appl Microbiol Biotechnol 103(19):8145-8155	31482283	Dentipellis_sp._KUC8613	dentipellis_sp._kuc8613	negative
Diaporthe ampelina	Ascomycota	Sordariomycetes	Diaporthales	Diaporthaceae	Ensembl/Fungi	GCA_001006365.1	02/07/2019	Morales-Cruz, A.; Amrine, K.C.; Blanco-Ulate, B.; Lawrence, D.P.; Travadon, R.; Rolshausen, P.E.; Baumgartner, K.; Cantu, D. Distinctive expansion of gene families associated with plant cell wall degradation, secondary metabolism, and nutrient uptake in the genomes of grapevine trunk pathogens. 2015, BMC Genomics 16(None):469	26084502	Diaporthe_ampelina	diaporthe_ampelina_gca_001006365	positive
Diaporthe helianthi	Ascomycota	Sordariomycetes	Diaporthales	Diaporthaceae	Ensembl/Fungi	GCA_001702395.2	02/07/2019	Baroncelli, R.; Scala, F.; Vergara, M.; Thon, M.R.; Ruocco, M. Draft whole-genome sequence of the <i>Diaporthe helianthi</i> 7/96 strain, causal agent of sunflower stem canker. 2016, Genom Data 10(None):151-152	27872817	Diaporthe_helianthi	diaporthe_helianthi_gca_001702395	negative
Dibaeis baeomyces	Ascomycota	Lecanoromycetes	Pertusariales	Icmadophilaceae	JGI/Mycocosm	Dibbae1	20/04/2021	McDonald, T.R.; Mueller, O.; Dietrich, F.S.; Lutzoni, F. High-throughput genome sequencing of lichenizing fungi to assess gene loss in the ammonium transporter/ammonia permease gene family. 2013, BMC Genomics 14(None):225	23557360	Dibaeis_baeomyces	dibaeis_baeomyces	negative
Dichomitus squalens LYAD-421 SS1	Basidiomycota	Agaricomycetes	Polyporales	Polyporaceae	NCBI/RefSeq	GCF_000275845.1	01/06/2019	Floudas, D.; Binder, M.; Riley, R.; Barry, K.; Blanchette, R.A.; Henrissat, B.; Martínez, A.T.; Otillar, R.; Spatafora, J.W.; Yadav, J.S.; Aerts, A.; Benoit, I.; Boyd, A.; Carlson, A.; Copeland, A.; Coutinho, P.M.; de Vries, R.P.; Ferreira, P.; Findley, K.; Foster, B.; Gaskell, J.; Glotzer, D.; Górecki, P.; Heitman, J.; Hesse, C.; Hori, C.; Igarashi, K.; Jurgens, J.A.; Kallen, N.; Kersten, P.; Ko…	22745431	Dichomitus_squalens_LYAD-421_SS1	Dichomitus_squalens	negative
Didymella exigua CBS 183.55	Ascomycota	Dothideomycetes	Pleosporales	Didymellaceae	JGI/Mycocosm	Didex1	20/04/2021	Haridas, S.; Albert, R.; Binder, M.; Bloem, J.; LaButti, K.; Salamov, A.; Andreopoulos, B.; Baker, S.E.; Barry, K.; Bills, G.; Bluhm, B.H.; Cannon, C.; Castanera, R.; Culley, D.E.; Daum, C.; Ezra, D.; González, J.B.; Henrissat, B.; Kuo, A.; Liang, C.; Lipzen, A.; Lutzoni, F.; Magnuson, J.; Mondo, S.J.; Nolan, M.; Ohm, R.A.; Pangilinan, J.; Park, H.J.; Ramírez, L.; Alfaro, M.; Sun, H.; Tritt, A.; …	32206138	Didymella_exigua_CBS_183.55	didymella_exigua_cbs_183.55	negative
Didymosphaeria enalia	Ascomycota	Dothideomycetes	Pleosporales	Didymosphaeriaceae	JGI/Mycocosm	Veren1	20/04/2021	Haridas, S.; Albert, R.; Binder, M.; Bloem, J.; LaButti, K.; Salamov, A.; Andreopoulos, B.; Baker, S.E.; Barry, K.; Bills, G.; Bluhm, B.H.; Cannon, C.; Castanera, R.; Culley, D.E.; Daum, C.; Ezra, D.; González, J.B.; Henrissat, B.; Kuo, A.; Liang, C.; Lipzen, A.; Lutzoni, F.; Magnuson, J.; Mondo, S.J.; Nolan, M.; Ohm, R.A.; Pangilinan, J.; Park, H.J.; Ramírez, L.; Alfaro, M.; Sun, H.; Tritt, A.; …	32206138	Didymosphaeria_enalia	verruculina_enalia_cbs_304.66	positive
Dimargaris cristalligena	Zoopagomycota	Dimargaritomycetes	Dimargaritales	Dimargaritaceae	NCBI/GenBank	GCA_003614675.1	01/07/2019	Ahrendt, S.R.; Quandt, C.A.; Ciobanu, D.; Clum, A.; Salamov, A.; Andreopoulos, B.; Cheng, J.F.; Woyke, T.; Pelin, A.; Henrissat, B.; Reynolds, N.K.; Benny, G.L.; Smith, M.E.; James, T.Y.; Grigoriev, I.V. Leveraging single-cell genomics to expand the fungal tree of life. 2018, Nat Microbiol 3(12):1417-1428	30297742	Dimargaris_cristalligena	Dimargaris_cristalligena	negative
Diplocarpon rosae	Ascomycota	Leotiomycetes	Helotiales	Dermateaceae	Ensembl/Fungi	GCA_002317995.1	02/07/2019	Neu, E.; Featherston, J.; Rees, J.; Debener, T. A draft genome sequence of the rose black spot fungus Diplocarpon rosae reveals a high degree of genome duplication. 2017, PLoS One 12(10):e0185310	28981525	Diplocarpon_rosae	diplocarpon_rosae_gca_002317995	negative
Diplodia seriata	Ascomycota	Dothideomycetes	Botryosphaeriales	Botryosphaeriaceae	Ensembl/Fungi	GCA_001975905.1	02/07/2019	Morales-Cruz, A.; Amrine, K.C.; Blanco-Ulate, B.; Lawrence, D.P.; Travadon, R.; Rolshausen, P.E.; Baumgartner, K.; Cantu, D. Distinctive expansion of gene families associated with plant cell wall degradation, secondary metabolism, and nutrient uptake in the genomes of grapevine trunk pathogens. 2015, BMC Genomics 16(None):469	26084502	Diplodia_seriata	diplodia_seriata_gca_001975905	negative
Dissoconium aciculare	Ascomycota	Dothideomycetes	Mycosphaerellales	Dissoconiaceae	JGI/Mycocosm	Disac1	20/04/2021	Haridas, S.; Albert, R.; Binder, M.; Bloem, J.; LaButti, K.; Salamov, A.; Andreopoulos, B.; Baker, S.E.; Barry, K.; Bills, G.; Bluhm, B.H.; Cannon, C.; Castanera, R.; Culley, D.E.; Daum, C.; Ezra, D.; González, J.B.; Henrissat, B.; Kuo, A.; Liang, C.; Lipzen, A.; Lutzoni, F.; Magnuson, J.; Mondo, S.J.; Nolan, M.; Ohm, R.A.; Pangilinan, J.; Park, H.J.; Ramírez, L.; Alfaro, M.; Sun, H.; Tritt, A.; …	32206138	Dissoconium_aciculare	dissoconium_aciculare	negative
Diutina rugosa	Ascomycota	Saccharomycetes	Saccharomycetales		NCBI/RefSeq	GCF_008704595.1	17/05/2021	Mixão, V.; Saus, E.; Hansen, A.P.; Lass-Florl, C.; Gabaldón, T. Genome Assemblies of Two Rare Opportunistic Yeast Pathogens: <i>Diutina rugosa</i> (syn. <i>Candida rugosa</i>) and <i>Trichomonascus ciferrii</i> (syn. <i>Candida ciferrii</i>). 2019, G3 (Bethesda) 9(12):3921-3927	31575637	Diutina_rugosa	Diutina_rugosa	negative
Diversispora versiformis	Mucoromycota	Glomeromycetes	Diversisporales	Diversisporaceae	NCBI/GenBank	GCA_003547095.1	01/07/2019	Sun, X.; Chen, W.; Ivanov, S.; MacLean, A.M.; Wight, H.; Ramaraj, T.; Mudge, J.; Harrison, M.J.; Fei, Z. Genome and evolution of the arbuscular mycorrhizal fungus Diversispora epigaea (formerly Glomus versiforme) and its bacterial endosymbionts. 2019, New Phytol 221(3):1556-1573	30368822	Diversispora_versiformis	Diversispora_epigaea	negative
Dothidotthia symphoricarpi	Ascomycota	Dothideomycetes	Pleosporales	Dothidotthiaceae	JGI/Mycocosm	Dotsy1	20/04/2021	Haridas, S.; Albert, R.; Binder, M.; Bloem, J.; LaButti, K.; Salamov, A.; Andreopoulos, B.; Baker, S.E.; Barry, K.; Bills, G.; Bluhm, B.H.; Cannon, C.; Castanera, R.; Culley, D.E.; Daum, C.; Ezra, D.; González, J.B.; Henrissat, B.; Kuo, A.; Liang, C.; Lipzen, A.; Lutzoni, F.; Magnuson, J.; Mondo, S.J.; Nolan, M.; Ohm, R.A.; Pangilinan, J.; Park, H.J.; Ramírez, L.; Alfaro, M.; Sun, H.; Tritt, A.; …	32206138	Dothidotthia_symphoricarpi	dothidotthia_symphoricarpi	negative
Dothistroma septosporum NZE10	Ascomycota	Dothideomycetes	Capnodiales	Mycosphaerellaceae	Ensembl/Fungi	GCA_000340195.1	02/07/2019	de Wit, P.J.; van der Burgt, A.; Ökmen, B.; Stergiopoulos, I.; Abd-Elsalam, K.A.; Aerts, A.L.; Bahkali, A.H.; Beenen, H.G.; Chettri, P.; Cox, M.P.; Datema, E.; de Vries, R.P.; Dhillon, B.; Ganley, A.R.; Griffiths, S.A.; Guo, Y.; Hamelin, R.C.; Henrissat, B.; Kabir, M.S.; Jashni, M.K.; Kema, G.; Klaubauf, S.; Lapidus, A.; Levasseur, A.; Lindquist, E.; Mehrabi, R.; Ohm, R.A.; Owen, T.J.; Salamov, A…	23209441	Dothistroma_septosporum_NZE10	dothistroma_septosporum	negative
Drechmeria coniospora	Ascomycota	Sordariomycetes	Hypocreales	Ophiocordycipitaceae	Ensembl/Fungi	GCA_001625195.1	02/07/2019	Zhang, L.; Zhou, Z.; Guo, Q.; Fokkens, L.; Miskei, M.; Pócsi, I.; Zhang, W.; Chen, M.; Wang, L.; Sun, Y.; Donzelli, B.G.; Gibson, D.M.; Nelson, D.R.; Luo, J.G.; Rep, M.; Liu, H.; Yang, S.; Wang, J.; Krasnoff, S.B.; Xu, Y.; Molnár, I.; Lin, M. Insights into Adaptations to a Near-Obligate Nematode Endoparasitic Lifestyle from the Finished Genome of Drechmeria coniospora. 2016, Sci Rep 6(None):23122	26975455	Drechmeria_coniospora	drechmeria_coniospora_gca_001625195	negative
Drechslerella stenobrocha 248	Ascomycota	Orbiliomycetes	Orbiliales	Orbiliaceae	Ensembl/Fungi	GCA_000525045.1	02/07/2019	Liu, K.; Zhang, W.; Lai, Y.; Xiang, M.; Wang, X.; Zhang, X.; Liu, X. Drechslerella stenobrocha genome illustrates the mechanism of constricting rings and the origin of nematode predation in fungi. 2014, BMC Genomics 15(None):114	24507587	Drechslerella_stenobrocha_248	drechslerella_stenobrocha_248_gca_000525045	negative
Earliella scabrosa	Basidiomycota	Agaricomycetes	Polyporales	Polyporaceae	JGI/Mycocosm	Earsca1	20/04/2021	Hage, H.; Miyauchi, S.; Virágh, M.; Drula, E.; Min, B.; Chaduli, D.; Navarro, D.; Favel, A.; Norest, M.; Lesage-Meessen, L.; Bálint, B.; Merényi, Z.; de Eugenio, L.; Morin, E.; Martínez, A.T.; Baldrian, P.; Štursová, M.; Martínez, M.J.; Novotny, C.; Magnuson, J.K.; Spatafora, J.W.; Maurice, S.; Pangilinan, J.; Andreopoulos, W.; LaButti, K.; Hundley, H.; Na, H.; Kuo, A.; Barry, K.; Lipzen, A.; Hen…	33538380	Earliella_scabrosa	earliella_scabrosa_cirm-brfm_1817	negative
Elaphomyces granulatus	Ascomycota	Eurotiomycetes	Eurotiales	Elaphomycetaceae	Ensembl/Fungi	GCA_002240705.1	02/07/2019	Quandt, C.A.; Kohler, A.; Hesse, C.N.; Sharpton, T.J.; Martin, F.; Spatafora, J.W. Metagenome sequence of Elaphomyces granulatus from sporocarp tissue reveals Ascomycota ectomycorrhizal fingerprints of genome expansion and a Proteobacteria-rich microbiome. 2015, Environ Microbiol 17(8):2952-68	25753751	Elaphomyces_granulatus	elaphomyces_granulatus_gca_002240705	negative
Elsinoe ampelina	Ascomycota	Dothideomycetes	Myriangiales	Elsinoaceae	JGI/Mycocosm	Elsamp1	20/04/2021	Haridas, S.; Albert, R.; Binder, M.; Bloem, J.; LaButti, K.; Salamov, A.; Andreopoulos, B.; Baker, S.E.; Barry, K.; Bills, G.; Bluhm, B.H.; Cannon, C.; Castanera, R.; Culley, D.E.; Daum, C.; Ezra, D.; González, J.B.; Henrissat, B.; Kuo, A.; Liang, C.; Lipzen, A.; Lutzoni, F.; Magnuson, J.; Mondo, S.J.; Nolan, M.; Ohm, R.A.; Pangilinan, J.; Park, H.J.; Ramírez, L.; Alfaro, M.; Sun, H.; Tritt, A.; …	32206138	Elsinoe_ampelina	elsinoe_ampelina_cect_20119	negative
Emergomyces pasteurianus Ep9510	Ascomycota	Eurotiomycetes	Onygenales	Ajellomycetaceae	Ensembl/Fungi	GCA_001883825.1	02/07/2019	Dukik, K.; Muñoz, J.F.; Jiang, Y.; Feng, P.; Sigler, L.; Stielow, J.B.; Freeke, J.; Jamalian, A.; Gerrits van den Ende, B.; McEwen, J.G.; Clay, O.K.; Schwartz, I.S.; Govender, N.P.; Maphanga, T.G.; Cuomo, C.A.; Moreno, L.F.; Kenyon, C.; Borman, A.M.; de Hoog, S. Novel taxa of thermally dimorphic systemic pathogens in the Ajellomycetaceae (Onygenales). 2017, Mycoses 60(5):296-309	28176377	Emergomyces_pasteurianus_Ep9510	emergomyces_pasteuriana_ep9510_gca_001883825	negative
Emmonsia crescens	Ascomycota	Eurotiomycetes	Onygenales	Ajellomycetaceae	Ensembl/Fungi	GCA_002572855.1	02/07/2019	Muñoz, J.F.; McEwen, J.G.; Clay, O.K.; Cuomo, C.A. Genome analysis reveals evolutionary mechanisms of adaptation in systemic dimorphic fungi. 2018, Sci Rep 8(1):4473	29540755	Emmonsia_crescens	emmonsia_crescens_gca_002572855	negative
Endocarpon pallidulum	Ascomycota	Eurotiomycetes	Verrucariales	Verrucariaceae	JGI/Mycocosm	Endpal1	20/04/2021	McDonald, T.R.; Mueller, O.; Dietrich, F.S.; Lutzoni, F. High-throughput genome sequencing of lichenizing fungi to assess gene loss in the ammonium transporter/ammonia permease gene family. 2013, BMC Genomics 14(None):225	23557360	Endocarpon_pallidulum	endocarpon_pallidulum_enpa	negative
Endocarpon pusillum Z07020	Ascomycota	Eurotiomycetes	Verrucariales	Verrucariaceae	Ensembl/Fungi	GCA_000464535.1	02/07/2019	Wang, Y.Y.; Liu, B.; Zhang, X.Y.; Zhou, Q.M.; Zhang, T.; Li, H.; Yu, Y.F.; Zhang, X.L.; Hao, X.Y.; Wang, M.; Wang, L.; Wei, J.C. Genome characteristics reveal the impact of lichenization on lichen-forming fungus Endocarpon pusillum Hedwig (Verrucariales, Ascomycota). 2014, BMC Genomics 15(None):34	24438332	Endocarpon_pusillum_Z07020	endocarpon_pusillum_z07020_gca_000464535	negative
Endogone sp.	Mucoromycota	Endogonomycetes	Endogonales	Endogonaceae	JGI/Mycocosm	Endsp1	01/06/2019	Chang, Y.; Desirò, A.; Na, H.; Sandor, L.; Lipzen, A.; Clum, A.; Barry, K.; Grigoriev, I.V.; Martin, F.M.; Stajich, J.E.; Smith, M.E.; Bonito, G.; Spatafora, J.W. Phylogenomics of Endogonaceae and evolution of mycorrhizas within Mucoromycota. 2019, New Phytol 222(1):511-525	30485448	Endogone_sp.	endogone_sp_flas_59071	negative
Endogone sp. FLAS-F59071	Mucoromycota	Endogonomycetes	Endogonales	Endogonaceae	NCBI/GenBank	GCA_003990785.1	01/07/2019	Chang, Y.; Desirò, A.; Na, H.; Sandor, L.; Lipzen, A.; Clum, A.; Barry, K.; Grigoriev, I.V.; Martin, F.M.; Stajich, J.E.; Smith, M.E.; Bonito, G.; Spatafora, J.W. Phylogenomics of Endogonaceae and evolution of mycorrhizas within Mucoromycota. 2019, New Phytol 222(1):511-525	30485448	Endogone_sp._FLAS-F59071	Endogone_sp._FLAS-F59071	negative
Epichloe festucae Fl1	Ascomycota	Sordariomycetes	Hypocreales	Clavicipitaceae	NCBI/GenBank	GCA_003814445.1	17/05/2021	Winter, D.J.; Ganley, A.R.D.; Young, C.A.; Liachko, I.; Schardl, C.L.; Dupont, P.Y.; Berry, D.; Ram, A.; Scott, B.; Cox, M.P. Repeat elements organise 3D genome structure and mediate transcription in the filamentous fungus Epichloë festucae. 2018, PLoS Genet 14(10):e1007467	30356280	Epichloe_festucae_Fl1	Epichloe_festucae_Fl1	negative
Epicoccum nigrum	Ascomycota	Dothideomycetes	Pleosporales	Didymellaceae	Ensembl/Fungi	GCA_002116315.1	02/07/2019	Fokin, M.; Fleetwood, D.; Weir, B.S.; Villas-Boas, S. Genome Sequence of the Saprophytic Ascomycete <i>Epicoccum</i><i>nigrum</i> Strain ICMP 19927, Isolated from New Zealand. 2017, Genome Announc 5(24):None	28619814	Epicoccum_nigrum	epicoccum_nigrum_gca_002116315	negative
Epithele typhae	Basidiomycota	Agaricomycetes	Russulales	Epitheliaceae	JGI/Mycocosm	Epityp1	20/04/2021	Hage, H.; Miyauchi, S.; Virágh, M.; Drula, E.; Min, B.; Chaduli, D.; Navarro, D.; Favel, A.; Norest, M.; Lesage-Meessen, L.; Bálint, B.; Merényi, Z.; de Eugenio, L.; Morin, E.; Martínez, A.T.; Baldrian, P.; Štursová, M.; Martínez, M.J.; Novotny, C.; Magnuson, J.K.; Spatafora, J.W.; Maurice, S.; Pangilinan, J.; Andreopoulos, W.; LaButti, K.; Hundley, H.; Na, H.; Kuo, A.; Barry, K.; Lipzen, A.; Hen…	33538380	Epithele_typhae	epithele_typhae_cbs_203.58	negative
Eremomyces bilateralis CBS 781.70	Ascomycota	Dothideomycetes	Eremomycetales	Eremomycetaceae	JGI/Mycocosm	Erebi1	20/04/2021	Haridas, S.; Albert, R.; Binder, M.; Bloem, J.; LaButti, K.; Salamov, A.; Andreopoulos, B.; Baker, S.E.; Barry, K.; Bills, G.; Bluhm, B.H.; Cannon, C.; Castanera, R.; Culley, D.E.; Daum, C.; Ezra, D.; González, J.B.; Henrissat, B.; Kuo, A.; Liang, C.; Lipzen, A.; Lutzoni, F.; Magnuson, J.; Mondo, S.J.; Nolan, M.; Ohm, R.A.; Pangilinan, J.; Park, H.J.; Ramírez, L.; Alfaro, M.; Sun, H.; Tritt, A.; …	32206138	Eremomyces_bilateralis_CBS_781.70	eremomyces_bilateralis_cbs_781.70	negative
Eremothecium cymbalariae DBVPG#7215	Ascomycota	Saccharomycetes	Saccharomycetales	Saccharomycetaceae	Ensembl/Fungi	GCA_000235365.1	02/07/2019	Wendland, J.; Walther, A. Genome evolution in the eremothecium clade of the Saccharomyces complex revealed by comparative genomics. 2011, G3 (Bethesda) 1(7):539-48	22384365	Eremothecium_cymbalariae_DBVPG#7215	eremothecium_cymbalariae_dbvpg_7215_gca_000235365	negative
Eremothecium gossypii ATCC 10895	Ascomycota	Saccharomycetes	Saccharomycetales	Saccharomycetaceae	NCBI/RefSeq	GCF_000091025.4	01/06/2019	Dietrich, F.S.; Voegeli, S.; Brachat, S.; Lerch, A.; Gates, K.; Steiner, S.; Mohr, C.; Pöhlmann, R.; Luedi, P.; Choi, S.; Wing, R.A.; Flavier, A.; Gaffney, T.D.; Philippsen, P. The Ashbya gossypii genome as a tool for mapping the ancient Saccharomyces cerevisiae genome. 2004, Science 304(5668):304-7	15001715	Eremothecium_gossypii_ATCC_10895	Eremothecium_gossypii	negative
Erysiphe necator	Ascomycota	Leotiomycetes	Erysiphales	Erysiphaceae	Ensembl/Fungi	GCA_000798715.1	02/07/2019	Jones, L.; Riaz, S.; Morales-Cruz, A.; Amrine, K.C.; McGuire, B.; Gubler, W.D.; Walker, M.A.; Cantu, D. Adaptive genomic structural variation in the grape powdery mildew pathogen, Erysiphe necator. 2014, BMC Genomics 15(None):1081	25487071	Erysiphe_necator	erysiphe_necator_gca_000798715	negative
Erysiphe pulchra	Ascomycota	Leotiomycetes	Erysiphales	Erysiphaceae	Ensembl/Fungi	GCA_002918395.1	02/07/2019	Wadl, P.A.; Mack, B.M.; Beltz, S.B.; Moore, G.G.; Baird, R.E.; Rinehart, T.A.; Molnar, T.J.; Staton, M.E.; Hadziabdic, D.; Trigiano, R.N. Development of Genomic Resources for the Powdery Mildew, <i>Erysiphe pulchra</i>. 2019, Plant Dis 103(5):804-807	30864941	Erysiphe_pulchra	erysiphe_pulchra_gca_002918395	negative
Escovopsis weberi	Ascomycota	Sordariomycetes	Hypocreales	Hypocreaceae	Ensembl/Fungi	GCA_001278495.1	02/07/2019	de Man, T.J.; Stajich, J.E.; Kubicek, C.P.; Teiling, C.; Chenthamara, K.; Atanasova, L.; Druzhinina, I.S.; Levenkova, N.; Birnbaum, S.S.; Barribeau, S.M.; Bozick, B.A.; Suen, G.; Currie, C.R.; Gerardo, N.M. Small genome of the fungus Escovopsis weberi, a specialized disease agent of ant agriculture. 2016, Proc Natl Acad Sci U S A 113(13):3567-72	26976598	Escovopsis_weberi	escovopsis_weberi_gca_001278495	negative
Eutypa lata UCREL1	Ascomycota	Sordariomycetes	Xylariales	Diatrypaceae	Ensembl/Fungi	GCA_000349385.1	02/07/2019	Blanco-Ulate, B.; Rolshausen, P.E.; Cantu, D. Draft Genome Sequence of the Grapevine Dieback Fungus Eutypa lata UCR-EL1. 2013, Genome Announc 1(3):None	23723393	Eutypa_lata_UCREL1	eutypa_lata_ucrel1_gca_000349385	negative
Exidia glandulosa HHB12029	Basidiomycota	Agaricomycetes	Auriculariales	Exidiaceae	Ensembl/Fungi	GCA_001632375.1	02/07/2019	Nagy, L.G.; Riley, R.; Tritt, A.; Adam, C.; Daum, C.; Floudas, D.; Sun, H.; Yadav, J.S.; Pangilinan, J.; Larsson, K.H.; Matsuura, K.; Barry, K.; Labutti, K.; Kuo, R.; Ohm, R.A.; Bhattacharya, S.S.; Shirouzu, T.; Yoshinaga, Y.; Martin, F.M.; Grigoriev, I.V.; Hibbett, D.S. Comparative Genomics of Early-Diverging Mushroom-Forming Fungi Provides Insights into the Origins of Lignocellulose Decay Capab…	26659563	Exidia_glandulosa_HHB12029	exidia_glandulosa_hhb12029_gca_001632375	negative
Exophiala aquamarina CBS 119918	Ascomycota	Eurotiomycetes	Chaetothyriales	Herpotrichiellaceae	Ensembl/Fungi	GCA_000709125.1	02/07/2019	Teixeira, M.M.; Moreno, L.F.; Stielow, B.J.; Muszewska, A.; Hainaut, M.; Gonzaga, L.; Abouelleil, A.; Patané, J.S.; Priest, M.; Souza, R.; Young, S.; Ferreira, K.S.; Zeng, Q.; da Cunha, M.M.; Gladki, A.; Barker, B.; Vicente, V.A.; de Souza, E.M.; Almeida, S.; Henrissat, B.; Vasconcelos, A.T.; Deng, S.; Voglmayr, H.; Moussa, T.A.; Gorbushina, A.; Felipe, M.S.; Cuomo, C.A.; de Hoog, G.S. Exploring …	28348446	Exophiala_aquamarina_CBS_119918	exophiala_aquamarina_cbs_119918_gca_000709125	negative
Exophiala dermatitidis NIH/UT8656	Ascomycota	Eurotiomycetes	Chaetothyriales	Herpotrichiellaceae	Ensembl/Fungi	GCA_000230625.1	02/07/2019	Chen, Z.; Martinez, D.A.; Gujja, S.; Sykes, S.M.; Zeng, Q.; Szaniszlo, P.J.; Wang, Z.; Cuomo, C.A. Comparative genomic and transcriptomic analysis of wangiella dermatitidis, a major cause of phaeohyphomycosis and a model black yeast human pathogen. 2014, G3 (Bethesda) 4(4):561-78	24496724	Exophiala_dermatitidis_NIH/UT8656	exophiala_dermatitidis_nih_ut8656_gca_000230625	negative
Exophiala mesophila	Ascomycota	Eurotiomycetes	Chaetothyriales	Herpotrichiellaceae	Ensembl/Fungi	GCA_000836275.1	02/07/2019	Teixeira, M.M.; Moreno, L.F.; Stielow, B.J.; Muszewska, A.; Hainaut, M.; Gonzaga, L.; Abouelleil, A.; Patané, J.S.; Priest, M.; Souza, R.; Young, S.; Ferreira, K.S.; Zeng, Q.; da Cunha, M.M.; Gladki, A.; Barker, B.; Vicente, V.A.; de Souza, E.M.; Almeida, S.; Henrissat, B.; Vasconcelos, A.T.; Deng, S.; Voglmayr, H.; Moussa, T.A.; Gorbushina, A.; Felipe, M.S.; Cuomo, C.A.; de Hoog, G.S. Exploring …	28348446	Exophiala_mesophila	exophiala_mesophila_gca_000836275	negative
Exophiala oligosperma	Ascomycota	Eurotiomycetes	Chaetothyriales	Herpotrichiellaceae	Ensembl/Fungi	GCA_000835515.1	02/07/2019	Teixeira, M.M.; Moreno, L.F.; Stielow, B.J.; Muszewska, A.; Hainaut, M.; Gonzaga, L.; Abouelleil, A.; Patané, J.S.; Priest, M.; Souza, R.; Young, S.; Ferreira, K.S.; Zeng, Q.; da Cunha, M.M.; Gladki, A.; Barker, B.; Vicente, V.A.; de Souza, E.M.; Almeida, S.; Henrissat, B.; Vasconcelos, A.T.; Deng, S.; Voglmayr, H.; Moussa, T.A.; Gorbushina, A.; Felipe, M.S.; Cuomo, C.A.; de Hoog, G.S. Exploring …	28348446	Exophiala_oligosperma	exophiala_oligosperma_gca_000835515	negative
Exophiala sideris	Ascomycota	Eurotiomycetes	Chaetothyriales	Herpotrichiellaceae	Ensembl/Fungi	GCA_000835395.1	02/07/2019	Teixeira, M.M.; Moreno, L.F.; Stielow, B.J.; Muszewska, A.; Hainaut, M.; Gonzaga, L.; Abouelleil, A.; Patané, J.S.; Priest, M.; Souza, R.; Young, S.; Ferreira, K.S.; Zeng, Q.; da Cunha, M.M.; Gladki, A.; Barker, B.; Vicente, V.A.; de Souza, E.M.; Almeida, S.; Henrissat, B.; Vasconcelos, A.T.; Deng, S.; Voglmayr, H.; Moussa, T.A.; Gorbushina, A.; Felipe, M.S.; Cuomo, C.A.; de Hoog, G.S. Exploring …	28348446	Exophiala_sideris	exophiala_sideris_gca_000835395	negative
Exophiala spinifera	Ascomycota	Eurotiomycetes	Chaetothyriales	Herpotrichiellaceae	Ensembl/Fungi	GCA_000836115.1	02/07/2019	Teixeira, M.M.; Moreno, L.F.; Stielow, B.J.; Muszewska, A.; Hainaut, M.; Gonzaga, L.; Abouelleil, A.; Patané, J.S.; Priest, M.; Souza, R.; Young, S.; Ferreira, K.S.; Zeng, Q.; da Cunha, M.M.; Gladki, A.; Barker, B.; Vicente, V.A.; de Souza, E.M.; Almeida, S.; Henrissat, B.; Vasconcelos, A.T.; Deng, S.; Voglmayr, H.; Moussa, T.A.; Gorbushina, A.; Felipe, M.S.; Cuomo, C.A.; de Hoog, G.S. Exploring …	28348446	Exophiala_spinifera	exophiala_spinifera_gca_000836115	negative
Exophiala xenobiotica	Ascomycota	Eurotiomycetes	Chaetothyriales	Herpotrichiellaceae	Ensembl/Fungi	GCA_000835505.1	02/07/2019	Teixeira, M.M.; Moreno, L.F.; Stielow, B.J.; Muszewska, A.; Hainaut, M.; Gonzaga, L.; Abouelleil, A.; Patané, J.S.; Priest, M.; Souza, R.; Young, S.; Ferreira, K.S.; Zeng, Q.; da Cunha, M.M.; Gladki, A.; Barker, B.; Vicente, V.A.; de Souza, E.M.; Almeida, S.; Henrissat, B.; Vasconcelos, A.T.; Deng, S.; Voglmayr, H.; Moussa, T.A.; Gorbushina, A.; Felipe, M.S.; Cuomo, C.A.; de Hoog, G.S. Exploring …	28348446	Exophiala_xenobiotica	exophiala_xenobiotica_gca_000835505	negative
Exserohilum turcica Et28A	Ascomycota	Dothideomycetes	Pleosporales	Pleosporaceae	Ensembl/Fungi	GCA_000359705.1	02/07/2019	Condon, B.J.; Leng, Y.; Wu, D.; Bushley, K.E.; Ohm, R.A.; Otillar, R.; Martin, J.; Schackwitz, W.; Grimwood, J.; MohdZainudin, N.; Xue, C.; Wang, R.; Manning, V.A.; Dhillon, B.; Tu, Z.J.; Steffenson, B.J.; Salamov, A.; Sun, H.; Lowry, S.; LaButti, K.; Han, J.; Copeland, A.; Lindquist, E.; Barry, K.; Schmutz, J.; Baker, S.E.; Ciuffetti, L.M.; Grigoriev, I.V.; Zhong, S.; Turgeon, B.G. Comparative g…	23357949	Exserohilum_turcica_Et28A	exserohilum_turcica_et28a_gca_000359705	positive
Fibroporia radiculosa	Basidiomycota	Agaricomycetes	Polyporales		Ensembl/Fungi	GCA_000313525.1	02/07/2019	Tang, J.D.; Perkins, A.D.; Sonstegard, T.S.; Schroeder, S.G.; Burgess, S.C.; Diehl, S.V. Short-read sequencing for genomic analysis of the brown rot fungus Fibroporia radiculosa. 2012, Appl Environ Microbiol 78(7):2272-81	22247176	Fibroporia_radiculosa	fibroporia_radiculosa_gca_000313525	negative
Fibularhizoctonia psychrophila	Basidiomycota	Agaricomycetes	Atheliales	Atheliaceae	JGI/Mycocosm	Fibsp1	20/04/2021	Nagy, L.G.; Riley, R.; Tritt, A.; Adam, C.; Daum, C.; Floudas, D.; Sun, H.; Yadav, J.S.; Pangilinan, J.; Larsson, K.H.; Matsuura, K.; Barry, K.; Labutti, K.; Kuo, R.; Ohm, R.A.; Bhattacharya, S.S.; Shirouzu, T.; Yoshinaga, Y.; Martin, F.M.; Grigoriev, I.V.; Hibbett, D.S. Comparative Genomics of Early-Diverging Mushroom-Forming Fungi Provides Insights into the Origins of Lignocellulose Decay Capab…	26659563	Fibularhizoctonia_psychrophila	fibulorhizoctonia_psychrophila_cbs_109695	negative
Fibularhizoctonia sp. CBS 109695	Basidiomycota	Agaricomycetes	Atheliales	Atheliaceae	Ensembl/Fungi	GCA_001630335.1	02/07/2019	Nagy, L.G.; Riley, R.; Tritt, A.; Adam, C.; Daum, C.; Floudas, D.; Sun, H.; Yadav, J.S.; Pangilinan, J.; Larsson, K.H.; Matsuura, K.; Barry, K.; Labutti, K.; Kuo, R.; Ohm, R.A.; Bhattacharya, S.S.; Shirouzu, T.; Yoshinaga, Y.; Martin, F.M.; Grigoriev, I.V.; Hibbett, D.S. Comparative Genomics of Early-Diverging Mushroom-Forming Fungi Provides Insights into the Origins of Lignocellulose Decay Capab…	26659563	Fibularhizoctonia_sp._CBS_109695	fibularhizoctonia_sp_cbs_109695_gca_001630335	negative
Fistulina hepatica ATCC 64428	Basidiomycota	Agaricomycetes	Agaricales	Fistulinaceae	NCBI/GenBank	GCA_000934395.1	01/06/2019	Floudas, D.; Held, B.W.; Riley, R.; Nagy, L.G.; Koehler, G.; Ransdell, A.S.; Younus, H.; Chow, J.; Chiniquy, J.; Lipzen, A.; Tritt, A.; Sun, H.; Haridas, S.; LaButti, K.; Ohm, R.A.; Kües, U.; Blanchette, R.A.; Grigoriev, I.V.; Minto, R.E.; Hibbett, D.S. Evolution of novel wood decay mechanisms in Agaricales revealed by the genome sequences of Fistulina hepatica and Cylindrobasidium torrendii. 201…	25683379	Fistulina_hepatica_ATCC_64428	Fistulina_hepatica	negative
Flammula alnicola	Basidiomycota	Agaricomycetes	Agaricales	Strophariaceae	JGI/Mycocosm	Phoaln1	20/04/2021	Ruiz-Dueñas, F.J.; Barrasa, J.M.; Sánchez-García, M.; Camarero, S.; Miyauchi, S.; Serrano, A.; Linde, D.; Babiker, R.; Drula, E.; Ayuso-Fernández, I.; Pacheco, R.; Padilla, G.; Ferreira, P.; Barriuso, J.; Kellner, H.; Castanera, R.; Alfaro, M.; Ramírez, L.; Pisabarro, A.G.; Riley, R.; Kuo, A.; Andreopoulos, W.; LaButti, K.; Pangilinan, J.; Tritt, A.; Lipzen, A.; He, G.; Yan, M.; Ng, V.; Grigoriev…	33211093	Flammula_alnicola	pholiota_alnicola_ah_47727	negative
Fomes fomentarius	Basidiomycota	Agaricomycetes	Polyporales	Polyporaceae	JGI/Mycocosm	Fomfom1	20/04/2021	Hage, H.; Miyauchi, S.; Virágh, M.; Drula, E.; Min, B.; Chaduli, D.; Navarro, D.; Favel, A.; Norest, M.; Lesage-Meessen, L.; Bálint, B.; Merényi, Z.; de Eugenio, L.; Morin, E.; Martínez, A.T.; Baldrian, P.; Štursová, M.; Martínez, M.J.; Novotny, C.; Magnuson, J.K.; Spatafora, J.W.; Maurice, S.; Pangilinan, J.; Andreopoulos, W.; LaButti, K.; Hundley, H.; Na, H.; Kuo, A.; Barry, K.; Lipzen, A.; Hen…	33538380	Fomes_fomentarius	fomes_fomentarius_cirm-brfm_1821	negative
Fomitiporia mediterranea MF3/22	Basidiomycota	Agaricomycetes	Hymenochaetales	Hymenochaetaceae	NCBI/RefSeq	GCF_000271605.1	01/06/2019	Floudas, D.; Binder, M.; Riley, R.; Barry, K.; Blanchette, R.A.; Henrissat, B.; Martínez, A.T.; Otillar, R.; Spatafora, J.W.; Yadav, J.S.; Aerts, A.; Benoit, I.; Boyd, A.; Carlson, A.; Copeland, A.; Coutinho, P.M.; de Vries, R.P.; Ferreira, P.; Findley, K.; Foster, B.; Gaskell, J.; Glotzer, D.; Górecki, P.; Heitman, J.; Hesse, C.; Hori, C.; Igarashi, K.; Jurgens, J.A.; Kallen, N.; Kersten, P.; Ko…	22745431	Fomitiporia_mediterranea_MF3/22	Fomitiporia_mediterranea	negative
Fomitopsis betulina	Basidiomycota	Agaricomycetes	Polyporales	Fomitopsidaceae	JGI/Mycocosm	Pipbet1_1	20/04/2021	Hage, H.; Miyauchi, S.; Virágh, M.; Drula, E.; Min, B.; Chaduli, D.; Navarro, D.; Favel, A.; Norest, M.; Lesage-Meessen, L.; Bálint, B.; Merényi, Z.; de Eugenio, L.; Morin, E.; Martínez, A.T.; Baldrian, P.; Štursová, M.; Martínez, M.J.; Novotny, C.; Magnuson, J.K.; Spatafora, J.W.; Maurice, S.; Pangilinan, J.; Andreopoulos, W.; LaButti, K.; Hundley, H.; Na, H.; Kuo, A.; Barry, K.; Lipzen, A.; Hen…	33538380	Fomitopsis_betulina	fomitopsis_betulina_cirm-brfm_1772	negative
Fomitopsis pinicola FP-58527 SS1	Basidiomycota	Agaricomycetes	Polyporales	Fomitopsidaceae	Ensembl/Fungi	GCA_000344655.2	02/07/2019	Floudas, D.; Binder, M.; Riley, R.; Barry, K.; Blanchette, R.A.; Henrissat, B.; Martínez, A.T.; Otillar, R.; Spatafora, J.W.; Yadav, J.S.; Aerts, A.; Benoit, I.; Boyd, A.; Carlson, A.; Copeland, A.; Coutinho, P.M.; de Vries, R.P.; Ferreira, P.; Findley, K.; Foster, B.; Gaskell, J.; Glotzer, D.; Górecki, P.; Heitman, J.; Hesse, C.; Hori, C.; Igarashi, K.; Jurgens, J.A.; Kallen, N.; Kersten, P.; Ko…	22745431	Fomitopsis_pinicola_FP-58527_SS1	fomitopsis_pinicola_fp_58527_ss1_gca_000344655	negative
Fomitopsis rosea	Basidiomycota	Agaricomycetes	Polyporales	Fomitopsidaceae	JGI/Mycocosm	Fomros1	20/04/2021	Hage, H.; Miyauchi, S.; Virágh, M.; Drula, E.; Min, B.; Chaduli, D.; Navarro, D.; Favel, A.; Norest, M.; Lesage-Meessen, L.; Bálint, B.; Merényi, Z.; de Eugenio, L.; Morin, E.; Martínez, A.T.; Baldrian, P.; Štursová, M.; Martínez, M.J.; Novotny, C.; Magnuson, J.K.; Spatafora, J.W.; Maurice, S.; Pangilinan, J.; Andreopoulos, W.; LaButti, K.; Hundley, H.; Na, H.; Kuo, A.; Barry, K.; Lipzen, A.; Hen…	33538380	Fomitopsis_rosea	rhodofomes_roseus_cirm-brfm_1785	negative
Fonsecaea erecta	Ascomycota	Eurotiomycetes	Chaetothyriales	Herpotrichiellaceae	Ensembl/Fungi	GCA_001651985.1	02/07/2019	Vicente, V.A.; Weiss, V.A.; Bombassaro, A.; Moreno, L.F.; Costa, F.F.; Raittz, R.T.; Leão, A.C.; Gomes, R.R.; Bocca, A.L.; Fornari, G.; de Castro, R.J.A.; Sun, J.; Faoro, H.; Tadra-Sfeir, M.Z.; Baura, V.; Balsanelli, E.; Almeida, S.R.; Dos Santos, S.S.; Teixeira, M.M.; Soares Felipe, M.S.; do Nascimento, M.M.F.; Pedrosa, F.O.; Steffens, M.B.; Attili-Angelis, D.; Najafzadeh, M.J.; Queiroz-Telles, …	29062304	Fonsecaea_erecta	fonsecaea_erecta_gca_001651985	negative
Fonsecaea monophora	Ascomycota	Eurotiomycetes	Chaetothyriales	Herpotrichiellaceae	Ensembl/Fungi	GCA_001642475.1	02/07/2019	Bombassaro, A.; de Hoog, S.; Weiss, V.A.; Souza, E.M.; Leão, A.C.; Costa, F.F.; Baura, V.; Tadra-Sfeir, M.Z.; Balsanelli, E.; Moreno, L.F.; Raittz, R.T.; Steffens, M.B.; Pedrosa, F.O.; Sun, J.; Xi, L.; Bocca, A.L.; Felipe, M.S.; Teixeira, M.; Santos, G.D.; Telles Filho, F.Q.; Azevedo, C.M.; Gomes, R.R.; Vicente, V.A. Draft Genome Sequence of Fonsecaea monophora Strain CBS 269.37, an Agent of Huma…	27469960	Fonsecaea_monophora	fonsecaea_monophora_gca_001642475	negative
Fonsecaea multimorphosa CBS 102226	Ascomycota	Eurotiomycetes	Chaetothyriales	Herpotrichiellaceae	Ensembl/Fungi	GCA_000836435.1	02/07/2019	Teixeira, M.M.; Moreno, L.F.; Stielow, B.J.; Muszewska, A.; Hainaut, M.; Gonzaga, L.; Abouelleil, A.; Patané, J.S.; Priest, M.; Souza, R.; Young, S.; Ferreira, K.S.; Zeng, Q.; da Cunha, M.M.; Gladki, A.; Barker, B.; Vicente, V.A.; de Souza, E.M.; Almeida, S.; Henrissat, B.; Vasconcelos, A.T.; Deng, S.; Voglmayr, H.; Moussa, T.A.; Gorbushina, A.; Felipe, M.S.; Cuomo, C.A.; de Hoog, G.S. Exploring …	28348446	Fonsecaea_multimorphosa_CBS_102226	fonsecaea_multimorphosa_cbs_102226_gca_000836435	positive
Fonsecaea nubica	Ascomycota	Eurotiomycetes	Chaetothyriales	Herpotrichiellaceae	Ensembl/Fungi	GCA_001646965.1	02/07/2019	Costa, F.F.; de Hoog, S.; Raittz, R.T.; Weiss, V.A.; Leão, A.C.; Bombassaro, A.; Sun, J.; Moreno, L.F.; Souza, E.M.; Pedrosa, F.O.; Steffens, M.B.; Baura, V.; Tadra-Sfeir, M.Z.; Balsanelli, E.; Najafzadeh, M.J.; Gomes, R.R.; Felipe, M.S.; Teixeira, M.; Santos, G.D.; Xi, L.; Alves de Castro, M.A.; Vicente, V.A. Draft Genome Sequence of Fonsecaea nubica Strain CBS 269.64, Causative Agent of Human C…	27491988	Fonsecaea_nubica	fonsecaea_nubica_gca_001646965	negative
Fonsecaea pedrosoi CBS 271.37	Ascomycota	Eurotiomycetes	Chaetothyriales	Herpotrichiellaceae	Ensembl/Fungi	GCA_000835455.1	02/07/2019	Teixeira, M.M.; Moreno, L.F.; Stielow, B.J.; Muszewska, A.; Hainaut, M.; Gonzaga, L.; Abouelleil, A.; Patané, J.S.; Priest, M.; Souza, R.; Young, S.; Ferreira, K.S.; Zeng, Q.; da Cunha, M.M.; Gladki, A.; Barker, B.; Vicente, V.A.; de Souza, E.M.; Almeida, S.; Henrissat, B.; Vasconcelos, A.T.; Deng, S.; Voglmayr, H.; Moussa, T.A.; Gorbushina, A.; Felipe, M.S.; Cuomo, C.A.; de Hoog, G.S. Exploring …	28348446	Fonsecaea_pedrosoi_CBS_271.37	fonsecaea_pedrosoi_cbs_271_37_gca_000835455	negative
Furculomyces boomerangus	Zoopagomycota	Harpellomycetes	Harpellales	Harpellaceae	NCBI/GenBank	GCA_003086725.1	01/07/2019	Wang, Y.; Stata, M.; Wang, W.; Stajich, J.E.; White, M.M.; Moncalvo, J.M. Comparative Genomics Reveals the Core Gene Toolbox for the Fungus-Insect Symbiosis. 2018, mBio 9(3):None	29764946	Furculomyces_boomerangus	Furculomyces_boomerangus	negative
Fusarium acutatum	Ascomycota	Sordariomycetes	Hypocreales	Nectriaceae	NCBI/GenBank	GCA_012932015.1	17/05/2021	Kim, H.S.; Lohmar, J.M.; Busman, M.; Brown, D.W.; Naumann, T.A.; Divon, H.H.; Lysøe, E.; Uhlig, S.; Proctor, R.H. Correction to: Identification and distribution of gene clusters required for synthesis of sphingolipid metabolism inhibitors in diverse species of the filamentous fungus Fusarium. 2020, BMC Genomics 21(1):712	33059601	Fusarium_acutatum	Fusarium_acutatum	negative
Fusarium albosuccineum	Ascomycota	Sordariomycetes	Hypocreales	Nectriaceae	NCBI/GenBank	GCA_012931995.1	17/05/2021	Kim, H.S.; Lohmar, J.M.; Busman, M.; Brown, D.W.; Naumann, T.A.; Divon, H.H.; Lysøe, E.; Uhlig, S.; Proctor, R.H. Correction to: Identification and distribution of gene clusters required for synthesis of sphingolipid metabolism inhibitors in diverse species of the filamentous fungus Fusarium. 2020, BMC Genomics 21(1):712	33059601	Fusarium_albosuccineum	Fusarium_albosuccineum	negative
Fusarium anthophilum	Ascomycota	Sordariomycetes	Hypocreales	Nectriaceae	NCBI/GenBank	GCA_013364935.1	17/05/2021	Kim, H.S.; Lohmar, J.M.; Busman, M.; Brown, D.W.; Naumann, T.A.; Divon, H.H.; Lysøe, E.; Uhlig, S.; Proctor, R.H. Correction to: Identification and distribution of gene clusters required for synthesis of sphingolipid metabolism inhibitors in diverse species of the filamentous fungus Fusarium. 2020, BMC Genomics 21(1):712	33059601	Fusarium_anthophilum	Fusarium_anthophilum	negative
Fusarium austroafricanum	Ascomycota	Sordariomycetes	Hypocreales	Nectriaceae	NCBI/GenBank	GCA_012932025.1	17/05/2021	Kim, H.S.; Lohmar, J.M.; Busman, M.; Brown, D.W.; Naumann, T.A.; Divon, H.H.; Lysøe, E.; Uhlig, S.; Proctor, R.H. Correction to: Identification and distribution of gene clusters required for synthesis of sphingolipid metabolism inhibitors in diverse species of the filamentous fungus Fusarium. 2020, BMC Genomics 21(1):712	33059601	Fusarium_austroafricanum	Fusarium_austroafricanum	negative
Fusarium avenaceum	Ascomycota	Sordariomycetes	Hypocreales	Nectriaceae	NCBI/GenBank	GCA_000769215.1	01/06/2019	Lysøe, E.; Harris, L.J.; Walkowiak, S.; Subramaniam, R.; Divon, H.H.; Riiser, E.S.; Llorens, C.; Gabaldón, T.; Kistler, H.C.; Jonkers, W.; Kolseth, A.K.; Nielsen, K.F.; Thrane, U.; Frandsen, R.J. The genome of the generalist plant pathogen Fusarium avenaceum is enriched with genes involved in redox, signaling and secondary metabolism. 2014, PLoS One 9(11):e112703	25409087	Fusarium_avenaceum	Fusarium_avenaceum	negative
Fusarium beomiforme	Ascomycota	Sordariomycetes	Hypocreales	Nectriaceae	NCBI/GenBank	GCA_002980475.2	17/05/2021	Laraba, I.; Keddad, A.; Boureghda, H.; Abdallah, N.; Vaughan, M.M.; Proctor, R.H.; Busman, M.; O'Donnell, K. Fusarium algeriense, sp. nov., a novel toxigenic crown rot pathogen of durum wheat from Algeria is nested in the Fusarium burgessii species complex. 2017, Mycologia 109(6):935-950	29528269	Fusarium_beomiforme	Fusarium_beomiforme	negative
Fusarium bulbicola	Ascomycota	Sordariomycetes	Hypocreales	Nectriaceae	NCBI/GenBank	GCA_013758895.1	17/05/2021	Kim, H.S.; Lohmar, J.M.; Busman, M.; Brown, D.W.; Naumann, T.A.; Divon, H.H.; Lysøe, E.; Uhlig, S.; Proctor, R.H. Correction to: Identification and distribution of gene clusters required for synthesis of sphingolipid metabolism inhibitors in diverse species of the filamentous fungus Fusarium. 2020, BMC Genomics 21(1):712	33059601	Fusarium_bulbicola	Fusarium_bulbicola	negative
Fusarium coicis	Ascomycota	Sordariomycetes	Hypocreales	Nectriaceae	NCBI/GenBank	GCA_013781345.1	17/05/2021	Kim, H.S.; Lohmar, J.M.; Busman, M.; Brown, D.W.; Naumann, T.A.; Divon, H.H.; Lysøe, E.; Uhlig, S.; Proctor, R.H. Correction to: Identification and distribution of gene clusters required for synthesis of sphingolipid metabolism inhibitors in diverse species of the filamentous fungus Fusarium. 2020, BMC Genomics 21(1):712	33059601	Fusarium_coicis	Fusarium_coicis	negative
Fusarium culmorum CS7071	Ascomycota	Sordariomycetes	Hypocreales	Nectriaceae	Ensembl/Fungi	1.31846e+06	02/07/2019	Urban, M.; King, R.; Andongabo, A.; Maheswari, U.; Pedro, H.; Kersey, P.; Hammond-Kosack, K. First Draft Genome Sequence of a UK Strain (UK99) of Fusarium culmorum. 2016, Genome Announc 4(5):None	27634986	Fusarium_culmorum_CS7071	fusarium_culmorum	positive
Fusarium decemcellulare	Ascomycota	Sordariomycetes	Hypocreales	Nectriaceae	NCBI/GenBank	GCA_013266205.1	17/05/2021	Kim, H.S.; Lohmar, J.M.; Busman, M.; Brown, D.W.; Naumann, T.A.; Divon, H.H.; Lysøe, E.; Uhlig, S.; Proctor, R.H. Correction to: Identification and distribution of gene clusters required for synthesis of sphingolipid metabolism inhibitors in diverse species of the filamentous fungus Fusarium. 2020, BMC Genomics 21(1):712	33059601	Fusarium_decemcellulare	Fusarium_decemcellulare	negative
Fusarium denticulatum	Ascomycota	Sordariomycetes	Hypocreales	Nectriaceae	NCBI/GenBank	GCA_013396175.1	17/05/2021	Kim, H.S.; Lohmar, J.M.; Busman, M.; Brown, D.W.; Naumann, T.A.; Divon, H.H.; Lysøe, E.; Uhlig, S.; Proctor, R.H. Correction to: Identification and distribution of gene clusters required for synthesis of sphingolipid metabolism inhibitors in diverse species of the filamentous fungus Fusarium. 2020, BMC Genomics 21(1):712	33059601	Fusarium_denticulatum	Fusarium_denticulatum	negative
Fusarium fujikuroi	Ascomycota	Sordariomycetes	Hypocreales	Nectriaceae	Ensembl/Fungi	GCA_000315255.1	02/07/2019	Jeong, H.; Lee, S.; Choi, G.J.; Lee, T.; Yun, S.H. Draft Genome Sequence of Fusarium fujikuroi B14, the Causal Agent of the Bakanae Disease of Rice. 2013, Genome Announc 1(1):None	23472226	Fusarium_fujikuroi	fusarium_fujikuroi	negative
Fusarium gaditjirri	Ascomycota	Sordariomycetes	Hypocreales	Nectriaceae	NCBI/GenBank	GCA_013266175.1	17/05/2021	Kim, H.S.; Lohmar, J.M.; Busman, M.; Brown, D.W.; Naumann, T.A.; Divon, H.H.; Lysøe, E.; Uhlig, S.; Proctor, R.H. Correction to: Identification and distribution of gene clusters required for synthesis of sphingolipid metabolism inhibitors in diverse species of the filamentous fungus Fusarium. 2020, BMC Genomics 21(1):712	33059601	Fusarium_gaditjirri	Fusarium_gaditjirri	negative
Fusarium globosum	Ascomycota	Sordariomycetes	Hypocreales	Nectriaceae	NCBI/GenBank	GCA_013396165.1	17/05/2021	Kim, H.S.; Lohmar, J.M.; Busman, M.; Brown, D.W.; Naumann, T.A.; Divon, H.H.; Lysøe, E.; Uhlig, S.; Proctor, R.H. Correction to: Identification and distribution of gene clusters required for synthesis of sphingolipid metabolism inhibitors in diverse species of the filamentous fungus Fusarium. 2020, BMC Genomics 21(1):712	33059601	Fusarium_globosum	Fusarium_globosum	negative
Fusarium graminearum	Ascomycota	Sordariomycetes	Hypocreales	Nectriaceae	Ensembl/Fungi	GCA_900044135.1	02/07/2019	King, R.; Urban, M.; Hammond-Kosack, K.E. Annotation of Fusarium graminearum (PH-1) Version 5.0. 2017, Genome Announc 5(2):None	28082505	Fusarium_graminearum	fusarium_graminearum	positive
Fusarium graminum	Ascomycota	Sordariomycetes	Hypocreales	Nectriaceae	NCBI/GenBank	GCA_013266165.1	17/05/2021	Kim, H.S.; Lohmar, J.M.; Busman, M.; Brown, D.W.; Naumann, T.A.; Divon, H.H.; Lysøe, E.; Uhlig, S.; Proctor, R.H. Correction to: Identification and distribution of gene clusters required for synthesis of sphingolipid metabolism inhibitors in diverse species of the filamentous fungus Fusarium. 2020, BMC Genomics 21(1):712	33059601	Fusarium_graminum	Fusarium_graminum	negative
Fusarium heterosporum	Ascomycota	Sordariomycetes	Hypocreales	Nectriaceae	NCBI/GenBank	GCA_013396295.1	17/05/2021	Kim, H.S.; Lohmar, J.M.; Busman, M.; Brown, D.W.; Naumann, T.A.; Divon, H.H.; Lysøe, E.; Uhlig, S.; Proctor, R.H. Correction to: Identification and distribution of gene clusters required for synthesis of sphingolipid metabolism inhibitors in diverse species of the filamentous fungus Fusarium. 2020, BMC Genomics 21(1):712	33059601	Fusarium_heterosporum	Fusarium_heterosporum	negative
Fusarium langsethiae	Ascomycota	Sordariomycetes	Hypocreales	Nectriaceae	Ensembl/Fungi	GCA_001292635.1	02/07/2019	Lysøe, E.; Frandsen, R.J.N.; Divon, H.H.; Terzi, V.; Orrù, L.; Lamontanara, A.; Kolseth, A.K.; Nielsen, K.F.; Thrane, U. Draft genome sequence and chemical profiling of Fusarium langsethiae, an emerging producer of type A trichothecenes. 2016, Int J Food Microbiol 221(None):29-36	26803271	Fusarium_langsethiae	fusarium_langsethiae_gca_001292635	negative
Fusarium longipes	Ascomycota	Sordariomycetes	Hypocreales	Nectriaceae	NCBI/GenBank	GCA_003012285.1	01/07/2019	Proctor, R.H.; McCormick, S.P.; Kim, H.S.; Cardoza, R.E.; Stanley, A.M.; Lindo, L.; Kelly, A.; Brown, D.W.; Lee, T.; Vaughan, M.M.; Alexander, N.J.; Busman, M.; Gutiérrez, S. Evolution of structural diversity of trichothecenes, a family of toxins produced by plant pathogenic and entomopathogenic fungi. 2018, PLoS Pathog 14(4):e1006946	29649280	Fusarium_longipes	Fusarium_longipes	negative
Fusarium mangiferae	Ascomycota	Sordariomycetes	Hypocreales	Nectriaceae	Ensembl/Fungi	GCA_900044065.1	02/07/2019	Niehaus, E.M.; Münsterkötter, M.; Proctor, R.H.; Brown, D.W.; Sharon, A.; Idan, Y.; Oren-Young, L.; Sieber, C.M.; Novák, O.; Pěnčík, A.; Tarkowská, D.; Hromadová, K.; Freeman, S.; Maymon, M.; Elazar, M.; Youssef, S.A.; El-Shabrawy, E.S.; Shalaby, A.B.; Houterman, P.; Brock, N.L.; Burkhardt, I.; Tsavkelova, E.A.; Dickschat, J.S.; Galuszka, P.; Güldener, U.; Tudzynski, B. Comparative ""Omics"" of t…	28040774	Fusarium_mangiferae	fusarium_mangiferae_gca_900044065	negative
Fusarium mexicanum	Ascomycota	Sordariomycetes	Hypocreales	Nectriaceae	NCBI/GenBank	GCA_013396015.1	17/05/2021	Kim, H.S.; Lohmar, J.M.; Busman, M.; Brown, D.W.; Naumann, T.A.; Divon, H.H.; Lysøe, E.; Uhlig, S.; Proctor, R.H. Correction to: Identification and distribution of gene clusters required for synthesis of sphingolipid metabolism inhibitors in diverse species of the filamentous fungus Fusarium. 2020, BMC Genomics 21(1):712	33059601	Fusarium_mexicanum	Fusarium_mexicanum	negative
Fusarium mundagurra	Ascomycota	Sordariomycetes	Hypocreales	Nectriaceae	NCBI/GenBank	GCA_013396205.1	17/05/2021	Kim, H.S.; Lohmar, J.M.; Busman, M.; Brown, D.W.; Naumann, T.A.; Divon, H.H.; Lysøe, E.; Uhlig, S.; Proctor, R.H. Correction to: Identification and distribution of gene clusters required for synthesis of sphingolipid metabolism inhibitors in diverse species of the filamentous fungus Fusarium. 2020, BMC Genomics 21(1):712	33059601	Fusarium_mundagurra	Fusarium_mundagurra	negative
Fusarium napiforme	Ascomycota	Sordariomycetes	Hypocreales	Nectriaceae	NCBI/GenBank	GCA_013396005.1	17/05/2021	Kim, H.S.; Lohmar, J.M.; Busman, M.; Brown, D.W.; Naumann, T.A.; Divon, H.H.; Lysøe, E.; Uhlig, S.; Proctor, R.H. Correction to: Identification and distribution of gene clusters required for synthesis of sphingolipid metabolism inhibitors in diverse species of the filamentous fungus Fusarium. 2020, BMC Genomics 21(1):712	33059601	Fusarium_napiforme	Fusarium_napiforme	negative
Fusarium oxysporum f. sp. lycopersici 4287	Ascomycota	Sordariomycetes	Hypocreales	Nectriaceae	Ensembl/Fungi	GCA_000222805.1	02/07/2019	Thatcher, L.F.; Gardiner, D.M.; Kazan, K.; Manners, J.M. A highly conserved effector in Fusarium oxysporum is required for full virulence on Arabidopsis. 2012, Mol Plant Microbe Interact 25(2):180-90	21942452	Fusarium_oxysporum_f._sp._lycopersici_4287	fusarium_oxysporum	negative
Fusarium phyllophilum	Ascomycota	Sordariomycetes	Hypocreales	Nectriaceae	NCBI/GenBank	GCA_013396025.1	17/05/2021	Kim, H.S.; Lohmar, J.M.; Busman, M.; Brown, D.W.; Naumann, T.A.; Divon, H.H.; Lysøe, E.; Uhlig, S.; Proctor, R.H. Correction to: Identification and distribution of gene clusters required for synthesis of sphingolipid metabolism inhibitors in diverse species of the filamentous fungus Fusarium. 2020, BMC Genomics 21(1):712	33059601	Fusarium_phyllophilum	Fusarium_phyllophilum	negative
Fusarium poae	Ascomycota	Sordariomycetes	Hypocreales	Nectriaceae	Ensembl/Fungi	GCA_001675295.1	02/07/2019	Vanheule, A.; Audenaert, K.; Warris, S.; van de Geest, H.; Schijlen, E.; Höfte, M.; De Saeger, S.; Haesaert, G.; Waalwijk, C.; van der Lee, T. Living apart together: crosstalk between the core and supernumerary genomes in a fungal plant pathogen. 2016, BMC Genomics 17(None):670	27552804	Fusarium_poae	fusarium_poae_gca_001675295	negative
Fusarium proliferatum ET1	Ascomycota	Sordariomycetes	Hypocreales	Nectriaceae	Ensembl/Fungi	GCA_900067095.1	02/07/2019	Niehaus, E.M.; Münsterkötter, M.; Proctor, R.H.; Brown, D.W.; Sharon, A.; Idan, Y.; Oren-Young, L.; Sieber, C.M.; Novák, O.; Pěnčík, A.; Tarkowská, D.; Hromadová, K.; Freeman, S.; Maymon, M.; Elazar, M.; Youssef, S.A.; El-Shabrawy, E.S.; Shalaby, A.B.; Houterman, P.; Brock, N.L.; Burkhardt, I.; Tsavkelova, E.A.; Dickschat, J.S.; Galuszka, P.; Güldener, U.; Tudzynski, B. Comparative ""Omics"" of t…	28040774	Fusarium_proliferatum_ET1	fusarium_proliferatum_et1_gca_900067095	negative
Fusarium pseudoanthophilum	Ascomycota	Sordariomycetes	Hypocreales	Nectriaceae	NCBI/GenBank	GCA_013395995.1	17/05/2021	Kim, H.S.; Lohmar, J.M.; Busman, M.; Brown, D.W.; Naumann, T.A.; Divon, H.H.; Lysøe, E.; Uhlig, S.; Proctor, R.H. Correction to: Identification and distribution of gene clusters required for synthesis of sphingolipid metabolism inhibitors in diverse species of the filamentous fungus Fusarium. 2020, BMC Genomics 21(1):712	33059601	Fusarium_pseudoanthophilum	Fusarium_pseudoanthophilum	negative
Fusarium pseudocircinatum	Ascomycota	Sordariomycetes	Hypocreales	Nectriaceae	NCBI/GenBank	GCA_013396035.1	17/05/2021	Kim, H.S.; Lohmar, J.M.; Busman, M.; Brown, D.W.; Naumann, T.A.; Divon, H.H.; Lysøe, E.; Uhlig, S.; Proctor, R.H. Correction to: Identification and distribution of gene clusters required for synthesis of sphingolipid metabolism inhibitors in diverse species of the filamentous fungus Fusarium. 2020, BMC Genomics 21(1):712	33059601	Fusarium_pseudocircinatum	Fusarium_pseudocircinatum	negative
Fusarium pseudograminearum CS3096	Ascomycota	Sordariomycetes	Hypocreales	Nectriaceae	Ensembl/Fungi	GCA_000303195.1	02/07/2019	Gardiner, D.M.; McDonald, M.C.; Covarelli, L.; Solomon, P.S.; Rusu, A.G.; Marshall, M.; Kazan, K.; Chakraborty, S.; McDonald, B.A.; Manners, J.M. Comparative pathogenomics reveals horizontally acquired novel virulence genes in fungi infecting cereal hosts. 2012, PLoS Pathog 8(9):e1002952	23028337	Fusarium_pseudograminearum_CS3096	fusarium_pseudograminearum	positive
Fusarium sarcochroum	Ascomycota	Sordariomycetes	Hypocreales	Nectriaceae	NCBI/GenBank	GCA_013266185.1	17/05/2021	Kim, H.S.; Lohmar, J.M.; Busman, M.; Brown, D.W.; Naumann, T.A.; Divon, H.H.; Lysøe, E.; Uhlig, S.; Proctor, R.H. Correction to: Identification and distribution of gene clusters required for synthesis of sphingolipid metabolism inhibitors in diverse species of the filamentous fungus Fusarium. 2020, BMC Genomics 21(1):712	33059601	Fusarium_sarcochroum	Fusarium_sarcochroum	negative
Fusarium sp. FIESC_12	Ascomycota	Sordariomycetes	Hypocreales	Nectriaceae	NCBI/GenBank	GCA_003012295.1	01/07/2019	Proctor, R.H.; McCormick, S.P.; Kim, H.S.; Cardoza, R.E.; Stanley, A.M.; Lindo, L.; Kelly, A.; Brown, D.W.; Lee, T.; Vaughan, M.M.; Alexander, N.J.; Busman, M.; Gutiérrez, S. Evolution of structural diversity of trichothecenes, a family of toxins produced by plant pathogenic and entomopathogenic fungi. 2018, PLoS Pathog 14(4):e1006946	29649280	Fusarium_sp._FIESC_12	Fusarium_sp._FIESC_12	positive
Fusarium sp. NRRL 25303	Ascomycota	Sordariomycetes	Hypocreales	Nectriaceae	NCBI/GenBank	GCA_013396255.1	17/05/2021	Kim, H.S.; Lohmar, J.M.; Busman, M.; Brown, D.W.; Naumann, T.A.; Divon, H.H.; Lysøe, E.; Uhlig, S.; Proctor, R.H. Correction to: Identification and distribution of gene clusters required for synthesis of sphingolipid metabolism inhibitors in diverse species of the filamentous fungus Fusarium. 2020, BMC Genomics 21(1):712	33059601	Fusarium_sp._NRRL_25303	Fusarium_sp._NRRL_25303	negative
Fusarium sp. NRRL 52700	Ascomycota	Sordariomycetes	Hypocreales	Nectriaceae	NCBI/GenBank	GCA_013396095.1	17/05/2021	Kim, H.S.; Lohmar, J.M.; Busman, M.; Brown, D.W.; Naumann, T.A.; Divon, H.H.; Lysøe, E.; Uhlig, S.; Proctor, R.H. Correction to: Identification and distribution of gene clusters required for synthesis of sphingolipid metabolism inhibitors in diverse species of the filamentous fungus Fusarium. 2020, BMC Genomics 21(1):712	33059601	Fusarium_sp._NRRL_52700	Fusarium_sp._NRRL_52700	negative
Fusarium sp. NRRL 66182	Ascomycota	Sordariomycetes	Hypocreales	Nectriaceae	NCBI/GenBank	GCA_013266265.1	17/05/2021	Kim, H.S.; Lohmar, J.M.; Busman, M.; Brown, D.W.; Naumann, T.A.; Divon, H.H.; Lysøe, E.; Uhlig, S.; Proctor, R.H. Correction to: Identification and distribution of gene clusters required for synthesis of sphingolipid metabolism inhibitors in diverse species of the filamentous fungus Fusarium. 2020, BMC Genomics 21(1):712	33059601	Fusarium_sp._NRRL_66182	Fusarium_sp._NRRL_66182	negative
Fusarium sporotrichioides	Ascomycota	Sordariomycetes	Hypocreales	Nectriaceae	NCBI/GenBank	GCA_003012315.1	01/07/2019	Proctor, R.H.; McCormick, S.P.; Kim, H.S.; Cardoza, R.E.; Stanley, A.M.; Lindo, L.; Kelly, A.; Brown, D.W.; Lee, T.; Vaughan, M.M.; Alexander, N.J.; Busman, M.; Gutiérrez, S. Evolution of structural diversity of trichothecenes, a family of toxins produced by plant pathogenic and entomopathogenic fungi. 2018, PLoS Pathog 14(4):e1006946	29649280	Fusarium_sporotrichioides	Fusarium_sporotrichioides	positive
Fusarium subglutinans	Ascomycota	Sordariomycetes	Hypocreales	Nectriaceae	NCBI/RefSeq	GCF_013396075.1	17/05/2021	Kim, H.S.; Lohmar, J.M.; Busman, M.; Brown, D.W.; Naumann, T.A.; Divon, H.H.; Lysøe, E.; Uhlig, S.; Proctor, R.H. Correction to: Identification and distribution of gene clusters required for synthesis of sphingolipid metabolism inhibitors in diverse species of the filamentous fungus Fusarium. 2020, BMC Genomics 21(1):712	33059601	Fusarium_subglutinans	Fusarium_subglutinans	negative
Fusarium tjaetaba	Ascomycota	Sordariomycetes	Hypocreales	Nectriaceae	NCBI/RefSeq	GCF_013396195.1	17/05/2021	Kim, H.S.; Lohmar, J.M.; Busman, M.; Brown, D.W.; Naumann, T.A.; Divon, H.H.; Lysøe, E.; Uhlig, S.; Proctor, R.H. Correction to: Identification and distribution of gene clusters required for synthesis of sphingolipid metabolism inhibitors in diverse species of the filamentous fungus Fusarium. 2020, BMC Genomics 21(1):712	33059601	Fusarium_tjaetaba	Fusarium_tjaetaba	negative
Fusarium venenatum	Ascomycota	Sordariomycetes	Hypocreales	Nectriaceae	Ensembl/Fungi	GCA_900007375.1	02/07/2019	King, R.; Brown, N.A.; Urban, M.; Hammond-Kosack, K.E. Inter-genome comparison of the Quorn fungus Fusarium venenatum and the closely related plant infecting pathogen Fusarium graminearum. 2018, BMC Genomics 19(1):269	29673315	Fusarium_venenatum	fusarium_venenatum_gca_900007375	negative
Fusarium verticillioides 7600	Ascomycota	Sordariomycetes	Hypocreales	Nectriaceae	Ensembl/Fungi	GCA_000149555.1	02/07/2019	Ma, L.J.; van der Does, H.C.; Borkovich, K.A.; Coleman, J.J.; Daboussi, M.J.; Di Pietro, A.; Dufresne, M.; Freitag, M.; Grabherr, M.; Henrissat, B.; Houterman, P.M.; Kang, S.; Shim, W.B.; Woloshuk, C.; Xie, X.; Xu, J.R.; Antoniw, J.; Baker, S.E.; Bluhm, B.H.; Breakspear, A.; Brown, D.W.; Butchko, R.A.; Chapman, S.; Coulson, R.; Coutinho, P.M.; Danchin, E.G.; Diener, A.; Gale, L.R.; Gardiner, D.M.…	20237561	Fusarium_verticillioides_7600	fusarium_verticillioides	negative
Fusarium zealandicum	Ascomycota	Sordariomycetes	Hypocreales	Nectriaceae	NCBI/GenBank	GCA_013266195.1	17/05/2021	Kim, H.S.; Lohmar, J.M.; Busman, M.; Brown, D.W.; Naumann, T.A.; Divon, H.H.; Lysøe, E.; Uhlig, S.; Proctor, R.H. Correction to: Identification and distribution of gene clusters required for synthesis of sphingolipid metabolism inhibitors in diverse species of the filamentous fungus Fusarium. 2020, BMC Genomics 21(1):712	33059601	Fusarium_zealandicum	Fusarium_zealandicum	negative
Gaeumannomyces tritici R3-111a-1	Ascomycota	Sordariomycetes	Magnaporthales	Magnaporthaceae	Ensembl/Fungi	GCA_000145635.1	02/07/2019	Okagaki, L.H.; Nunes, C.C.; Sailsbery, J.; Clay, B.; Brown, D.; John, T.; Oh, Y.; Young, N.; Fitzgerald, M.; Haas, B.J.; Zeng, Q.; Young, S.; Adiconis, X.; Fan, L.; Levin, J.Z.; Mitchell, T.K.; Okubara, P.A.; Farman, M.L.; Kohn, L.M.; Birren, B.; Ma, L.J.; Dean, R.A. Genome Sequences of Three Phytopathogenic Species of the Magnaporthaceae Family of Fungi. 2015, G3 (Bethesda) 5(12):2539-45	26416668	Gaeumannomyces_tritici_R3-111a-1	gaeumannomyces_graminis	negative
Galactomyces reessii	Ascomycota	Saccharomycetes	Saccharomycetales	Dipodascaceae	NCBI/GenBank	GCA_013305925.1	17/05/2021	Perkins, V.; Vignola, S.; Lessard, M.H.; Plante, P.L.; Corbeil, J.; Dugat-Bony, E.; Frenette, M.; Labrie, S. Phenotypic and Genetic Characterization of the Cheese Ripening Yeast <i>Geotrichum candidum</i>. 2020, Front Microbiol 11(None):737	32457706	Galactomyces_reessii	Galactomyces_reessii	negative
Galerina marginata CBS 339.88	Basidiomycota	Agaricomycetes	Agaricales	Strophariaceae	Ensembl/Fungi	GCA_000697645.1	02/07/2019	Riley, R.; Salamov, A.A.; Brown, D.W.; Nagy, L.G.; Floudas, D.; Held, B.W.; Levasseur, A.; Lombard, V.; Morin, E.; Otillar, R.; Lindquist, E.A.; Sun, H.; LaButti, K.M.; Schmutz, J.; Jabbour, D.; Luo, H.; Baker, S.E.; Pisabarro, A.G.; Walton, J.D.; Blanchette, R.A.; Henrissat, B.; Martin, F.; Cullen, D.; Hibbett, D.S.; Grigoriev, I.V. Extensive sampling of basidiomycete genomes demonstrates inadeq…	24958869	Galerina_marginata_CBS_339.88	galerina_marginata_cbs_339_88_gca_000697645	negative
Ganoderma sinense ZZ0214-1	Basidiomycota	Agaricomycetes	Polyporales	Polyporaceae	Ensembl/Fungi	GCA_002760635.1	02/07/2019	Zhu, Y.; Xu, J.; Sun, C.; Zhou, S.; Xu, H.; Nelson, D.R.; Qian, J.; Song, J.; Luo, H.; Xiang, L.; Li, Y.; Xu, Z.; Ji, A.; Wang, L.; Lu, S.; Hayward, A.; Sun, W.; Li, X.; Schwartz, D.C.; Wang, Y.; Chen, S. Chromosome-level genome map provides insights into diverse defense mechanisms in the medicinal fungus Ganoderma sinense. 2015, Sci Rep 5(None):11087	26046933	Ganoderma_sinense_ZZ0214-1	ganoderma_sinense_zz0214_1_gca_002760635	negative
Ganoderma sp. 10597 SS1	Basidiomycota	Agaricomycetes	Polyporales	Polyporaceae	JGI/Mycocosm	Gansp1	01/06/2019	Binder, M.; Justo, A.; Riley, R.; Salamov, A.; Lopez-Giraldez, F.; Sjökvist, E.; Copeland, A.; Foster, B.; Sun, H.; Larsson, E.; Larsson, K.H.; Townsend, J.; Grigoriev, I.V.; Hibbett, D.S. Phylogenetic and phylogenomic overview of the Polyporales. None, Mycologia 105(6):1350-73	23935031	Ganoderma_sp._10597_SS1	ganoderma_sp._10597_ss1	negative
Gautieria morchelliformis	Basidiomycota	Agaricomycetes	Gomphales	Gautieriaceae	JGI/Mycocosm	Gaumor1_1	20/04/2021	Miyauchi, S.; Kiss, E.; Kuo, A.; Drula, E.; Kohler, A.; Sánchez-García, M.; Morin, E.; Andreopoulos, B.; Barry, K.W.; Bonito, G.; Buée, M.; Carver, A.; Chen, C.; Cichocki, N.; Clum, A.; Culley, D.; Crous, P.W.; Fauchery, L.; Girlanda, M.; Hayes, R.D.; Kéri, Z.; LaButti, K.; Lipzen, A.; Lombard, V.; Magnuson, J.; Maillard, F.; Murat, C.; Nolan, M.; Ohm, R.A.; Pangilinan, J.; Pereira, M.F.; Perotto…	33046698	Gautieria_morchelliformis	gautieria_morchelliformis_gmne.bst	negative
Gelatoporia subvermispora B	Basidiomycota	Agaricomycetes	Polyporales	Gelatoporiaceae	Ensembl/Fungi	GCA_000320605.2	02/07/2019	Fernandez-Fueyo, E.; Ruiz-Dueñas, F.J.; Ferreira, P.; Floudas, D.; Hibbett, D.S.; Canessa, P.; Larrondo, L.F.; James, T.Y.; Seelenfreund, D.; Lobos, S.; Polanco, R.; Tello, M.; Honda, Y.; Watanabe, T.; Watanabe, T.; Ryu, J.S.; San, R.J.; Kubicek, C.P.; Schmoll, M.; Gaskell, J.; Hammel, K.E.; St John, F.J.; Vanden Wymelenberg, A.; Sabat, G.; Splinter BonDurant, S.; Syed, K.; Yadav, J.S.; Doddapane…	22434909	Gelatoporia_subvermispora_B	gelatoporia_subvermispora_b_gca_000320605	negative
Geosiphon pyriformis	Mucoromycota	Glomeromycetes	Archaeosporales	Geosiphonaceae	JGI/Mycocosm	Geopyr1	20/04/2021	Malar C, M.; Krüger, M.; Krüger, C.; Wang, Y.; Stajich, J.E.; Keller, J.; Chen, E.C.H.; Yildirir, G.; Villeneuve-Laroche, M.; Roux, C.; Delaux, P.M.; Corradi, N. The genome of Geosiphon pyriformis reveals ancestral traits linked to the emergence of the arbuscular mycorrhizal symbiosis. 2021, Curr Biol 31(7):1570-1577.e4	33592192	Geosiphon_pyriformis	geosiphon_pyriformis	negative
Geotrichum candidum	Ascomycota	Saccharomycetes	Saccharomycetales	Dipodascaceae	NCBI/GenBank	GCA_001402995.1	01/06/2019	Morel, G.; Sterck, L.; Swennen, D.; Marcet-Houben, M.; Onesime, D.; Levasseur, A.; Jacques, N.; Mallet, S.; Couloux, A.; Labadie, K.; Amselem, J.; Beckerich, J.M.; Henrissat, B.; Van de Peer, Y.; Wincker, P.; Souciet, J.L.; Gabaldón, T.; Tinsley, C.R.; Casaregola, S. Differential gene retention as an evolutionary mechanism to generate biodiversity and adaptation in yeasts. 2015, Sci Rep 5(None):1…	26108467	Geotrichum_candidum	Geotrichum_candidum	negative
Gigaspora rosea	Mucoromycota	Glomeromycetes	Diversisporales	Gigasporaceae	NCBI/GenBank	GCA_003550325.1	02/07/2019	Morin, E.; Miyauchi, S.; San Clemente, H.; Chen, E.C.H.; Pelin, A.; de la Providencia, I.; Ndikumana, S.; Beaudet, D.; Hainaut, M.; Drula, E.; Kuo, A.; Tang, N.; Roy, S.; Viala, J.; Henrissat, B.; Grigoriev, I.V.; Corradi, N.; Roux, C.; Martin, F.M. Comparative genomics of Rhizophagus irregularis, R. cerebriforme, R. diaphanus and Gigaspora rosea highlights specific genetic features in Glomeromyc…	30636349	Gigaspora_rosea	Gigaspora_rosea	negative
Glarea lozoyensis ATCC 20868	Ascomycota	Leotiomycetes	Helotiales	Helotiaceae	Ensembl/Fungi	GCA_000409485.1	02/07/2019	Chen, L.; Yue, Q.; Zhang, X.; Xiang, M.; Wang, C.; Li, S.; Che, Y.; Ortiz-López, F.J.; Bills, G.F.; Liu, X.; An, Z. Genomics-driven discovery of the pneumocandin biosynthetic gene cluster in the fungus Glarea lozoyensis. 2013, BMC Genomics 14(None):339	23688303	Glarea_lozoyensis_ATCC_20868	glarea_lozoyensis_atcc_20868_gca_000409485	positive
Gloeophyllum trabeum ATCC 11539	Basidiomycota	Agaricomycetes	Gloeophyllales	Gloeophyllaceae	Ensembl/Fungi	GCA_000344685.1	02/07/2019	Floudas, D.; Binder, M.; Riley, R.; Barry, K.; Blanchette, R.A.; Henrissat, B.; Martínez, A.T.; Otillar, R.; Spatafora, J.W.; Yadav, J.S.; Aerts, A.; Benoit, I.; Boyd, A.; Carlson, A.; Copeland, A.; Coutinho, P.M.; de Vries, R.P.; Ferreira, P.; Findley, K.; Foster, B.; Gaskell, J.; Glotzer, D.; Górecki, P.; Heitman, J.; Hesse, C.; Hori, C.; Igarashi, K.; Jurgens, J.A.; Kallen, N.; Kersten, P.; Ko…	22745431	Gloeophyllum_trabeum_ATCC_11539	gloeophyllum_trabeum_atcc_11539_gca_000344685	negative
Glomus cerebriforme	Mucoromycota	Glomeromycetes	Glomerales	Glomeraceae	NCBI/GenBank	GCA_003550305.1	02/07/2019	Morin, E.; Miyauchi, S.; San Clemente, H.; Chen, E.C.H.; Pelin, A.; de la Providencia, I.; Ndikumana, S.; Beaudet, D.; Hainaut, M.; Drula, E.; Kuo, A.; Tang, N.; Roy, S.; Viala, J.; Henrissat, B.; Grigoriev, I.V.; Corradi, N.; Roux, C.; Martin, F.M. Comparative genomics of Rhizophagus irregularis, R. cerebriforme, R. diaphanus and Gigaspora rosea highlights specific genetic features in Glomeromyc…	30636349	Glomus_cerebriforme	Glomus_cerebriforme	negative
Glonium stellatum	Ascomycota	Dothideomycetes		Gloniaceae	NCBI/GenBank	GCA_001692915.1	01/06/2019	Peter, M.; Kohler, A.; Ohm, R.A.; Kuo, A.; Krützmann, J.; Morin, E.; Arend, M.; Barry, K.W.; Binder, M.; Choi, C.; Clum, A.; Copeland, A.; Grisel, N.; Haridas, S.; Kipfer, T.; LaButti, K.; Lindquist, E.; Lipzen, A.; Maire, R.; Meier, B.; Mihaltcheva, S.; Molinier, V.; Murat, C.; Pöggeler, S.; Quandt, C.A.; Sperisen, C.; Tritt, A.; Tisserant, E.; Crous, P.W.; Henrissat, B.; Nehls, U.; Egli, S.; Sp…	27601008	Glonium_stellatum	Glonium_stellatum	negative
Golovinomyces cichoracearum	Ascomycota	Leotiomycetes	Erysiphales	Erysiphaceae	NCBI/GenBank	GCA_003611235.1	02/07/2019	Wu, Y.; Ma, X.; Pan, Z.; Kale, S.D.; Song, Y.; King, H.; Zhang, Q.; Presley, C.; Deng, X.; Wei, C.I.; Xiao, S. Comparative genome analyses reveal sequence features reflecting distinct modes of host-adaptation between dicot and monocot powdery mildew. 2018, BMC Genomics 19(1):705	30253736	Golovinomyces_cichoracearum	Golovinomyces_cichoracearum	negative
Gonapodya prolifera JEL478	Chytridiomycota	Monoblepharidomycetes	Monoblepharidales	Gonapodyaceae	Ensembl/Fungi	GCA_001574975.1	02/07/2019	Chang, Y.; Wang, S.; Sekimoto, S.; Aerts, A.L.; Choi, C.; Clum, A.; LaButti, K.M.; Lindquist, E.A.; Yee Ngan, C.; Ohm, R.A.; Salamov, A.A.; Grigoriev, I.V.; Spatafora, J.W.; Berbee, M.L. Phylogenomic Analyses Indicate that Early Fungi Evolved Digesting Cell Walls of Algal Ancestors of Land Plants. 2015, Genome Biol Evol 7(6):1590-601	25977457	Gonapodya_prolifera_JEL478	gonapodya_prolifera_jel478_gca_001574975	negative
Graphis scripta	Ascomycota	Lecanoromycetes	Ostropales	Graphidaceae	JGI/Mycocosm	Grascr1	20/04/2021	McDonald, T.R.; Mueller, O.; Dietrich, F.S.; Lutzoni, F. High-throughput genome sequencing of lichenizing fungi to assess gene loss in the ammonium transporter/ammonia permease gene family. 2013, BMC Genomics 14(None):225	23557360	Graphis_scripta	graphis_scripta_cbs_132367	positive
Grosmannia clavigera kw1407	Ascomycota	Sordariomycetes	Ophiostomatales	Ophiostomataceae	Ensembl/Fungi	GCA_000143105.2	02/07/2019	DiGuistini, S.; Wang, Y.; Liao, N.Y.; Taylor, G.; Tanguay, P.; Feau, N.; Henrissat, B.; Chan, S.K.; Hesse-Orce, U.; Alamouti, S.M.; Tsui, C.K.; Docking, R.T.; Levasseur, A.; Haridas, S.; Robertson, G.; Birol, I.; Holt, R.A.; Marra, M.A.; Hamelin, R.C.; Hirst, M.; Jones, S.J.; Bohlmann, J.; Breuil, C. Genome and transcriptome analyses of the mountain pine beetle-fungal symbiont Grosmannia claviger…	21262841	Grosmannia_clavigera_kw1407	grosmannia_clavigera_kw1407_gca_000143105	negative
Gymnopilus dilepis	Basidiomycota	Agaricomycetes	Agaricales	Cortinariaceae	NCBI/GenBank	GCA_002938385.1	02/07/2019	Reynolds, H.T.; Vijayakumar, V.; Gluck-Thaler, E.; Korotkin, H.B.; Matheny, P.B.; Slot, J.C. Horizontal gene cluster transfer increased hallucinogenic mushroom diversity. 2018, Evol Lett 2(2):88-101	30283667	Gymnopilus_dilepis	Gymnopilus_dilepis	negative
Gymnopilus junonius	Basidiomycota	Agaricomycetes	Agaricales	Cortinariaceae	JGI/Mycocosm	Gymjun1	20/04/2021	Ruiz-Dueñas, F.J.; Barrasa, J.M.; Sánchez-García, M.; Camarero, S.; Miyauchi, S.; Serrano, A.; Linde, D.; Babiker, R.; Drula, E.; Ayuso-Fernández, I.; Pacheco, R.; Padilla, G.; Ferreira, P.; Barriuso, J.; Kellner, H.; Castanera, R.; Alfaro, M.; Ramírez, L.; Pisabarro, A.G.; Riley, R.; Kuo, A.; Andreopoulos, W.; LaButti, K.; Pangilinan, J.; Tritt, A.; Lipzen, A.; He, G.; Yan, M.; Ng, V.; Grigoriev…	33211093	Gymnopilus_junonius	gymnopilus_junonius_ah_44721	negative
Gymnopus androsaceus JB14	Basidiomycota	Agaricomycetes	Agaricales	Omphalotaceae	JGI/Mycocosm	Gyman1	20/04/2021	Barbi, F.; Kohler, A.; Barry, K.; Baskaran, P.; Daum, C.; Fauchery, L.; Ihrmark, K.; Kuo, A.; LaButti, K.; Lipzen, A.; Morin, E.; Grigoriev, I.V.; Henrissat, B.; Lindahl, B.D.; Martin, F. Fungal ecological strategies reflected in gene transcription - a case study of two litter decomposers. 2020, Environ Microbiol 22(3):1089-1103	31760680	Gymnopus_androsaceus_JB14	gymnopus_androsaceus_jb14	negative
Gymnopus luxurians FD-317 M1	Basidiomycota	Agaricomycetes	Agaricales	Omphalotaceae	NCBI/GenBank	GCA_000827265.1	01/06/2019	Kohler, A.; Kuo, A.; Nagy, L.G.; Morin, E.; Barry, K.W.; Buscot, F.; Canbäck, B.; Choi, C.; Cichocki, N.; Clum, A.; Colpaert, J.; Copeland, A.; Costa, M.D.; Doré, J.; Floudas, D.; Gay, G.; Girlanda, M.; Henrissat, B.; Herrmann, S.; Hess, J.; Högberg, N.; Johansson, T.; Khouja, H.R.; LaButti, K.; Lahrmann, U.; Levasseur, A.; Lindquist, E.A.; Lipzen, A.; Marmeisse, R.; Martino, E.; Murat, C.; Ngan,…	25706625	Gymnopus_luxurians_FD-317_M1	Gymnopus_luxurians	negative
Gyrodon lividus BX	Basidiomycota	Agaricomycetes	Boletales	Gyrodontaceae	JGI/Mycocosm	Gyrli1	20/04/2021	Miyauchi, S.; Kiss, E.; Kuo, A.; Drula, E.; Kohler, A.; Sánchez-García, M.; Morin, E.; Andreopoulos, B.; Barry, K.W.; Bonito, G.; Buée, M.; Carver, A.; Chen, C.; Cichocki, N.; Clum, A.; Culley, D.; Crous, P.W.; Fauchery, L.; Girlanda, M.; Hayes, R.D.; Kéri, Z.; LaButti, K.; Lipzen, A.; Lombard, V.; Magnuson, J.; Maillard, F.; Murat, C.; Nolan, M.; Ohm, R.A.; Pangilinan, J.; Pereira, M.F.; Perotto…	33046698	Gyrodon_lividus_BX	gyrodon_lividus_bx	negative
Hanseniaspora guilliermondii	Ascomycota	Saccharomycetes	Saccharomycetales	Saccharomycodaceae	Ensembl/Fungi	GCA_900119595.1	02/07/2019	Seixas, I.; Barbosa, C.; Mendes-Faia, A.; Güldener, U.; Tenreiro, R.; Mendes-Ferreira, A.; Mira, N.P. Genome sequence of the non-conventional wine yeast Hanseniaspora guilliermondii UTAD222 unveils relevant traits of this species and of the Hanseniaspora genus in the context of wine fermentation. 2019, DNA Res 26(1):67-83	30462193	Hanseniaspora_guilliermondii	hanseniaspora_guilliermondii_gca_900119595	negative
Hanseniaspora opuntiae	Ascomycota	Saccharomycetes	Saccharomycetales	Saccharomycodaceae	JGI/Mycocosm	Hanop1	20/04/2021	Sternes, P.R.; Lee, D.; Kutyna, D.R.; Borneman, A.R. Genome Sequences of Three Species of Hanseniaspora Isolated from Spontaneous Wine Fermentations. 2016, Genome Announc 4(6):None	27856586	Hanseniaspora_opuntiae	hanseniaspora_opuntiae_awri3578	negative
Hanseniaspora osmophila	Ascomycota	Saccharomycetes	Saccharomycetales	Saccharomycodaceae	JGI/Mycocosm	Hanos1	20/04/2021	Sternes, P.R.; Lee, D.; Kutyna, D.R.; Borneman, A.R. Genome Sequences of Three Species of Hanseniaspora Isolated from Spontaneous Wine Fermentations. 2016, Genome Announc 4(6):None	27856586	Hanseniaspora_osmophila	hanseniaspora_osmophila_awri3579	negative
Hanseniaspora uvarum DSM 2768	Ascomycota	Saccharomycetes	Saccharomycetales	Saccharomycodaceae	Ensembl/Fungi	GCA_000968475.1	02/07/2019	Langenberg, A.K.; Bink, F.J.; Wolff, L.; Walter, S.; von Wallbrunn, C.; Grossmann, M.; Heinisch, J.J.; Schmitz, H.P. Glycolytic Functions Are Conserved in the Genome of the Wine Yeast Hanseniaspora uvarum, and Pyruvate Kinase Limits Its Capacity for Alcoholic Fermentation. 2017, Appl Environ Microbiol 83(22):None	28887422	Hanseniaspora_uvarum_DSM_2768	hanseniaspora_uvarum_dsm_2768_gca_000968475	negative
Hanseniaspora valbyensis NRRL Y-1626	Ascomycota	Saccharomycetes	Saccharomycetales	Saccharomycodaceae	Ensembl/Fungi	GCA_001664025.1	02/07/2019	Riley, R.; Haridas, S.; Wolfe, K.H.; Lopes, M.R.; Hittinger, C.T.; Göker, M.; Salamov, A.A.; Wisecaver, J.H.; Long, T.M.; Calvey, C.H.; Aerts, A.L.; Barry, K.W.; Choi, C.; Clum, A.; Coughlan, A.Y.; Deshpande, S.; Douglass, A.P.; Hanson, S.J.; Klenk, H.P.; LaButti, K.M.; Lapidus, A.; Lindquist, E.A.; Lipzen, A.M.; Meier-Kolthoff, J.P.; Ohm, R.A.; Otillar, R.P.; Pangilinan, J.L.; Peng, Y.; Rokas, A…	27535936	Hanseniaspora_valbyensis_NRRL_Y-1626	hanseniaspora_valbyensis_nrrl_y_1626_gca_001664025	negative
Hebeloma cylindrosporum h7	Basidiomycota	Agaricomycetes	Agaricales	Cortinariaceae	Ensembl/Fungi	GCA_000827355.1	02/07/2019	Kohler, A.; Kuo, A.; Nagy, L.G.; Morin, E.; Barry, K.W.; Buscot, F.; Canbäck, B.; Choi, C.; Cichocki, N.; Clum, A.; Colpaert, J.; Copeland, A.; Costa, M.D.; Doré, J.; Floudas, D.; Gay, G.; Girlanda, M.; Henrissat, B.; Herrmann, S.; Hess, J.; Högberg, N.; Johansson, T.; Khouja, H.R.; LaButti, K.; Lahrmann, U.; Levasseur, A.; Lindquist, E.A.; Lipzen, A.; Marmeisse, R.; Martino, E.; Murat, C.; Ngan,…	25706625	Hebeloma_cylindrosporum_h7	hebeloma_cylindrosporum_h7_gca_000827355	negative
Helicocarpus griseus UAMH5409	Ascomycota	Eurotiomycetes	Onygenales	Ajellomycetaceae	Ensembl/Fungi	GCA_002573585.1	02/07/2019	Muñoz, J.F.; McEwen, J.G.; Clay, O.K.; Cuomo, C.A. Genome analysis reveals evolutionary mechanisms of adaptation in systemic dimorphic fungi. 2018, Sci Rep 8(1):4473	29540755	Helicocarpus_griseus_UAMH5409	helicocarpus_griseus_uamh5409_gca_002573585	negative
Heliocybe sulcata	Basidiomycota	Agaricomycetes	Gloeophyllales		NCBI/GenBank	GCA_004369045.1	02/07/2019	Varga, T.; Krizsán, K.; Földi, C.; Dima, B.; Sánchez-García, M.; Sánchez-Ramírez, S.; Szöllősi, G.J.; Szarkándi, J.G.; Papp, V.; Albert, L.; Andreopoulos, W.; Angelini, C.; Antonín, V.; Barry, K.W.; Bougher, N.L.; Buchanan, P.; Buyck, B.; Bense, V.; Catcheside, P.; Chovatia, M.; Cooper, J.; Dämon, W.; Desjardin, D.; Finy, P.; Geml, J.; Haridas, S.; Hughes, K.; Justo, A.; Karasiński, D.; Kautmanov…	30886374	Heliocybe_sulcata	Heliocybe_sulcata	negative
Helotiales sp. DMI_Dod_QoI	Ascomycota	Leotiomycetes	Helotiales		NCBI/GenBank	GCA_009613015.1	17/05/2021	Lichtner, F.J.; Jurick, W.M.; Ayer, K.M.; Gaskins, V.L.; Villani, S.M.; Cox, K.D. A Genome Resource for Several North American <i>Venturia inaequalis</i> Isolates with Multiple Fungicide Resistance Phenotypes. 2020, Phytopathology 110(3):544-546	31729927	Helotiales_sp._DMI_Dod_QoI	Helotiales_sp._DMI_Dod_QoI	negative
Hesseltinella vesiculosa	Mucoromycota	Mucoromycetes	Mucorales	Cunninghamellaceae	Ensembl/Fungi	GCA_002104935.1	02/07/2019	Mondo, S.J.; Dannebaum, R.O.; Kuo, R.C.; Louie, K.B.; Bewick, A.J.; LaButti, K.; Haridas, S.; Kuo, A.; Salamov, A.; Ahrendt, S.R.; Lau, R.; Bowen, B.P.; Lipzen, A.; Sullivan, W.; Andreopoulos, B.B.; Clum, A.; Lindquist, E.; Daum, C.; Northen, T.R.; Kunde-Ramamoorthy, G.; Schmitz, R.J.; Gryganskyi, A.; Culley, D.; Magnuson, J.; James, T.Y.; O'Malley, M.A.; Stajich, J.E.; Spatafora, J.W.; Visel, A.…	28481340	Hesseltinella_vesiculosa	hesseltinella_vesiculosa_gca_002104935	negative
Heterobasidion annosum	Basidiomycota	Agaricomycetes	Russulales	Bondarzewiaceae	JGI/Mycocosm	Hetan2	01/06/2019	Olson, Å.; Aerts, A.; Asiegbu, F.; Belbahri, L.; Bouzid, O.; Broberg, A.; Canbäck, B.; Coutinho, P.M.; Cullen, D.; Dalman, K.; Deflorio, G.; van Diepen, L.T.A.; Dunand, C.; Duplessis, S.; Durling, M.; Gonthier, P.; Grimwood, J.; Fossdal, C.G.; Hansson, D.; Henrissat, B.; Hietala, A.; Himmelstrand, K.; Hoffmeister, D.; Högberg, N.; James, T.Y.; Karlsson, M.; Kohler, A.; Kües, U.; Lee, Y.H.; Lin, Y…	22463738	Heterobasidion_annosum	heterobasidion_annosum	negative
Heterobasidion irregulare TC 32-1	Basidiomycota	Agaricomycetes	Russulales	Bondarzewiaceae	Ensembl/Fungi	GCA_000320585.2	02/07/2019	Olson, Å.; Aerts, A.; Asiegbu, F.; Belbahri, L.; Bouzid, O.; Broberg, A.; Canbäck, B.; Coutinho, P.M.; Cullen, D.; Dalman, K.; Deflorio, G.; van Diepen, L.T.A.; Dunand, C.; Duplessis, S.; Durling, M.; Gonthier, P.; Grimwood, J.; Fossdal, C.G.; Hansson, D.; Henrissat, B.; Hietala, A.; Himmelstrand, K.; Hoffmeister, D.; Högberg, N.; James, T.Y.; Karlsson, M.; Kohler, A.; Kües, U.; Lee, Y.H.; Lin, Y…	22463738	Heterobasidion_irregulare_TC_32-1	heterobasidion_irregulare_tc_32_1_gca_000320585	negative
Hexagonia nitida	Basidiomycota	Agaricomycetes	Polyporales	Polyporaceae	JGI/Mycocosm	Hexnit1	20/04/2021	Hage, H.; Miyauchi, S.; Virágh, M.; Drula, E.; Min, B.; Chaduli, D.; Navarro, D.; Favel, A.; Norest, M.; Lesage-Meessen, L.; Bálint, B.; Merényi, Z.; de Eugenio, L.; Morin, E.; Martínez, A.T.; Baldrian, P.; Štursová, M.; Martínez, M.J.; Novotny, C.; Magnuson, J.K.; Spatafora, J.W.; Maurice, S.; Pangilinan, J.; Andreopoulos, W.; LaButti, K.; Hundley, H.; Na, H.; Kuo, A.; Barry, K.; Lipzen, A.; Hen…	33538380	Hexagonia_nitida	hexagonia_nitida_cirm-brfm_1802	negative
Hirsutella minnesotensis 3608	Ascomycota	Sordariomycetes	Hypocreales	Ophiocordycipitaceae	NCBI/GenBank	GCA_000956045.1	01/06/2019	Lai, Y.; Liu, K.; Zhang, X.; Zhang, X.; Li, K.; Wang, N.; Shu, C.; Wu, Y.; Wang, C.; Bushley, K.E.; Xiang, M.; Liu, X. Comparative genomics and transcriptomics analyses reveal divergent lifestyle features of nematode endoparasitic fungus Hirsutella minnesotensis. 2014, Genome Biol Evol 6(11):3077-93	25359922	Hirsutella_minnesotensis_3608	Hirsutella_minnesotensis	negative
Histoplasma capsulatum NAm1	Ascomycota	Eurotiomycetes	Onygenales	Ajellomycetaceae	NCBI/RefSeq	GCF_000149585.1	01/06/2019	Sharpton, T.J.; Stajich, J.E.; Rounsley, S.D.; Gardner, M.J.; Wortman, J.R.; Jordar, V.S.; Maiti, R.; Kodira, C.D.; Neafsey, D.E.; Zeng, Q.; Hung, C.Y.; McMahan, C.; Muszewska, A.; Grynberg, M.; Mandel, M.A.; Kellner, E.M.; Barker, B.M.; Galgiani, J.N.; Orbach, M.J.; Kirkland, T.N.; Cole, G.T.; Henn, M.R.; Birren, B.W.; Taylor, J.W. Comparative genomic analyses of the human fungal pathogens Cocci…	19717792	Histoplasma_capsulatum_NAm1	Histoplasma_capsulatum	negative
Homolaphlyctis polyrhiza	Chytridiomycota	Chytridiomycetes	Rhizophydiales		JGI/Mycocosm	Hompol1	08/10/2019	Joneson, S.; Stajich, J.E.; Shiu, S.H.; Rosenblum, E.B. Genomic transition to pathogenicity in chytrid fungi. 2011, PLoS Pathog 7(11):e1002338	22072962	Homolaphlyctis_polyrhiza	homolaphlyctis_polyrhiza_jel142	negative
Hortaea werneckii EXF-2000	Ascomycota	Dothideomycetes	Capnodiales	Teratosphaeriaceae	Ensembl/Fungi	GCA_002127715.1	02/07/2019	Lenassi, M.; Gostinčar, C.; Jackman, S.; Turk, M.; Sadowski, I.; Nislow, C.; Jones, S.; Birol, I.; Cimerman, N.G.; Plemenitaš, A. Whole genome duplication and enrichment of metal cation transporters revealed by de novo genome sequencing of extremely halotolerant black yeast Hortaea werneckii. 2013, PLoS One 8(8):e71328	23977017	Hortaea_werneckii_EXF-2000	hortaea_werneckii_exf_2000_gca_002127715	negative
Hyaloscypha variabilis F	Ascomycota	Leotiomycetes	Helotiales	Hyaloscyphaceae	Ensembl/Fungi	GCA_002865655.1	02/07/2019	Martino, E.; Morin, E.; Grelet, G.A.; Kuo, A.; Kohler, A.; Daghino, S.; Barry, K.W.; Cichocki, N.; Clum, A.; Dockter, R.B.; Hainaut, M.; Kuo, R.C.; LaButti, K.; Lindahl, B.D.; Lindquist, E.A.; Lipzen, A.; Khouja, H.R.; Magnuson, J.; Murat, C.; Ohm, R.A.; Singer, S.W.; Spatafora, J.W.; Wang, M.; Veneault-Fourrey, C.; Henrissat, B.; Grigoriev, I.V.; Martin, F.M.; Perotto, S. Comparative genomics an…	29315638	Hyaloscypha_variabilis_F	meliniomyces_variabilis_f_gca_002865655	negative
Hydnomerulius pinastri MD-312	Basidiomycota	Agaricomycetes	Boletales	Paxillaceae	NCBI/GenBank	GCA_000827185.1	01/06/2019	Kohler, A.; Kuo, A.; Nagy, L.G.; Morin, E.; Barry, K.W.; Buscot, F.; Canbäck, B.; Choi, C.; Cichocki, N.; Clum, A.; Colpaert, J.; Copeland, A.; Costa, M.D.; Doré, J.; Floudas, D.; Gay, G.; Girlanda, M.; Henrissat, B.; Herrmann, S.; Hess, J.; Högberg, N.; Johansson, T.; Khouja, H.R.; LaButti, K.; Lahrmann, U.; Levasseur, A.; Lindquist, E.A.; Lipzen, A.; Marmeisse, R.; Martino, E.; Murat, C.; Ngan,…	25706625	Hydnomerulius_pinastri_MD-312	Hydnomerulius_pinastri	negative
Hydnopolyporus fimbriatus	Basidiomycota	Agaricomycetes	Polyporales	Irpicaceae	JGI/Mycocosm	Hydfim1	20/04/2021	Hage, H.; Miyauchi, S.; Virágh, M.; Drula, E.; Min, B.; Chaduli, D.; Navarro, D.; Favel, A.; Norest, M.; Lesage-Meessen, L.; Bálint, B.; Merényi, Z.; de Eugenio, L.; Morin, E.; Martínez, A.T.; Baldrian, P.; Štursová, M.; Martínez, M.J.; Novotny, C.; Magnuson, J.K.; Spatafora, J.W.; Maurice, S.; Pangilinan, J.; Andreopoulos, W.; LaButti, K.; Hundley, H.; Na, H.; Kuo, A.; Barry, K.; Lipzen, A.; Hen…	33538380	Hydnopolyporus_fimbriatus	hydnopolyporus_fimbriatus_cbs384.51	negative
Hydnum rufescens UP504	Basidiomycota	Agaricomycetes	Cantharellales	Hydnaceae	JGI/Mycocosm	Hydru2	20/04/2021	Miyauchi, S.; Kiss, E.; Kuo, A.; Drula, E.; Kohler, A.; Sánchez-García, M.; Morin, E.; Andreopoulos, B.; Barry, K.W.; Bonito, G.; Buée, M.; Carver, A.; Chen, C.; Cichocki, N.; Clum, A.; Culley, D.; Crous, P.W.; Fauchery, L.; Girlanda, M.; Hayes, R.D.; Kéri, Z.; LaButti, K.; Lipzen, A.; Lombard, V.; Magnuson, J.; Maillard, F.; Murat, C.; Nolan, M.; Ohm, R.A.; Pangilinan, J.; Pereira, M.F.; Perotto…	33046698	Hydnum_rufescens_UP504	hydnum_rufescens_up504	negative
Hymenopellis radicata	Basidiomycota	Agaricomycetes	Agaricales	Physalacriaceae	JGI/Mycocosm	Hymrad1	20/04/2021	Ruiz-Dueñas, F.J.; Barrasa, J.M.; Sánchez-García, M.; Camarero, S.; Miyauchi, S.; Serrano, A.; Linde, D.; Babiker, R.; Drula, E.; Ayuso-Fernández, I.; Pacheco, R.; Padilla, G.; Ferreira, P.; Barriuso, J.; Kellner, H.; Castanera, R.; Alfaro, M.; Ramírez, L.; Pisabarro, A.G.; Riley, R.; Kuo, A.; Andreopoulos, W.; LaButti, K.; Pangilinan, J.; Tritt, A.; Lipzen, A.; He, G.; Yan, M.; Ng, V.; Grigoriev…	33211093	Hymenopellis_radicata	hymenopellis_radicata_ijfm_a160	negative
Hypholoma sublateritium FD-334 SS-4	Basidiomycota	Agaricomycetes	Agaricales	Strophariaceae	Ensembl/Fungi	GCA_000827495.1	02/07/2019	Kohler, A.; Kuo, A.; Nagy, L.G.; Morin, E.; Barry, K.W.; Buscot, F.; Canbäck, B.; Choi, C.; Cichocki, N.; Clum, A.; Colpaert, J.; Copeland, A.; Costa, M.D.; Doré, J.; Floudas, D.; Gay, G.; Girlanda, M.; Henrissat, B.; Herrmann, S.; Hess, J.; Högberg, N.; Johansson, T.; Khouja, H.R.; LaButti, K.; Lahrmann, U.; Levasseur, A.; Lindquist, E.A.; Lipzen, A.; Marmeisse, R.; Martino, E.; Murat, C.; Ngan,…	25706625	Hypholoma_sublateritium_FD-334_SS-4	hypholoma_sublateritium_fd_334_ss_4_gca_000827495	negative
Hyphopichia burtonii NRRL Y-1933	Ascomycota	Saccharomycetes	Saccharomycetales	Debaryomycetaceae	Ensembl/Fungi	GCA_001661395.1	02/07/2019	Riley, R.; Haridas, S.; Wolfe, K.H.; Lopes, M.R.; Hittinger, C.T.; Göker, M.; Salamov, A.A.; Wisecaver, J.H.; Long, T.M.; Calvey, C.H.; Aerts, A.L.; Barry, K.W.; Choi, C.; Clum, A.; Coughlan, A.Y.; Deshpande, S.; Douglass, A.P.; Hanson, S.J.; Klenk, H.P.; LaButti, K.M.; Lapidus, A.; Lindquist, E.A.; Lipzen, A.M.; Meier-Kolthoff, J.P.; Ohm, R.A.; Otillar, R.P.; Pangilinan, J.L.; Peng, Y.; Rokas, A…	27535936	Hyphopichia_burtonii_NRRL_Y-1933	hyphopichia_burtonii_nrrl_y_1933_gca_001661395	negative
Hypoxylon sp. CI-4A	Ascomycota	Sordariomycetes	Xylariales	Hypoxylaceae	Ensembl/Fungi	GCA_002120315.1	02/07/2019	Wu, W.; Davis, R.W.; Tran-Gyamfi, M.B.; Kuo, A.; LaButti, K.; Mihaltcheva, S.; Hundley, H.; Chovatia, M.; Lindquist, E.; Barry, K.; Grigoriev, I.V.; Henrissat, B.; Gladden, J.M. Characterization of four endophytic fungi as potential consolidated bioprocessing hosts for conversion of lignocellulose into advanced biofuels. 2017, Appl Microbiol Biotechnol 101(6):2603-2618	28078400	Hypoxylon_sp._CI-4A	hypoxylon_sp_ci_4a_gca_002120315	negative
Hypoxylon sp. CO27-5	Ascomycota	Sordariomycetes	Xylariales	Hypoxylaceae	Ensembl/Fungi	GCA_002120305.1	02/07/2019	Wu, W.; Davis, R.W.; Tran-Gyamfi, M.B.; Kuo, A.; LaButti, K.; Mihaltcheva, S.; Hundley, H.; Chovatia, M.; Lindquist, E.; Barry, K.; Grigoriev, I.V.; Henrissat, B.; Gladden, J.M. Characterization of four endophytic fungi as potential consolidated bioprocessing hosts for conversion of lignocellulose into advanced biofuels. 2017, Appl Microbiol Biotechnol 101(6):2603-2618	28078400	Hypoxylon_sp._CO27-5	hypoxylon_sp_co27_5_gca_002120305	negative
Hypoxylon sp. EC38	Ascomycota	Sordariomycetes	Xylariales	Hypoxylaceae	Ensembl/Fungi	GCA_002120335.1	02/07/2019	Wu, W.; Davis, R.W.; Tran-Gyamfi, M.B.; Kuo, A.; LaButti, K.; Mihaltcheva, S.; Hundley, H.; Chovatia, M.; Lindquist, E.; Barry, K.; Grigoriev, I.V.; Henrissat, B.; Gladden, J.M. Characterization of four endophytic fungi as potential consolidated bioprocessing hosts for conversion of lignocellulose into advanced biofuels. 2017, Appl Microbiol Biotechnol 101(6):2603-2618	28078400	Hypoxylon_sp._EC38	hypoxylon_sp_ec38_gca_002120335	negative
Hypsizygus marmoreus	Basidiomycota	Agaricomycetes	Agaricales	Lyophyllaceae	Ensembl/Fungi	GCA_001605315.1	02/07/2019	Min, B.; Kim, S.; Oh, Y.L.; Kong, W.S.; Park, H.; Cho, H.; Jang, K.Y.; Kim, J.G.; Choi, I.G. Genomic discovery of the hypsin gene and biosynthetic pathways for terpenoids in Hypsizygus marmoreus. 2018, BMC Genomics 19(1):789	30382831	Hypsizygus_marmoreus	hypsizygus_marmoreus_gca_001605315	negative
Hysterangium stoloniferum HS.BST	Basidiomycota	Agaricomycetes	Hysterangiales	Hysterangiaceae	JGI/Mycocosm	Hyssto1	20/04/2021	Miyauchi, S.; Kiss, E.; Kuo, A.; Drula, E.; Kohler, A.; Sánchez-García, M.; Morin, E.; Andreopoulos, B.; Barry, K.W.; Bonito, G.; Buée, M.; Carver, A.; Chen, C.; Cichocki, N.; Clum, A.; Culley, D.; Crous, P.W.; Fauchery, L.; Girlanda, M.; Hayes, R.D.; Kéri, Z.; LaButti, K.; Lipzen, A.; Lombard, V.; Magnuson, J.; Maillard, F.; Murat, C.; Nolan, M.; Ohm, R.A.; Pangilinan, J.; Pereira, M.F.; Perotto…	33046698	Hysterangium_stoloniferum_HS.BST	hysterangium_stoloniferum_hs.bst	negative
Hysterium pulicare	Ascomycota	Dothideomycetes	Hysteriales	Hysteriaceae	JGI/Mycocosm	Hyspu1_1	01/06/2019	Ohm, R.A.; Feau, N.; Henrissat, B.; Schoch, C.L.; Horwitz, B.A.; Barry, K.W.; Condon, B.J.; Copeland, A.C.; Dhillon, B.; Glaser, F.; Hesse, C.N.; Kosti, I.; LaButti, K.; Lindquist, E.A.; Lucas, S.; Salamov, A.A.; Bradshaw, R.E.; Ciuffetti, L.; Hamelin, R.C.; Kema, G.H.; Lawrence, C.; Scott, J.A.; Spatafora, J.W.; Turgeon, B.G.; de Wit, P.J.; Zhong, S.; Goodwin, S.B.; Grigoriev, I.V. Diverse lifes…	23236275	Hysterium_pulicare	hysterium_pulicare	negative
Ilyonectria sp.	Ascomycota	Sordariomycetes	Hypocreales	Nectriaceae	JGI/Mycocosm	None	26/06/2019	Liao, H.L.; Bonito, G.; Rojas, J.A.; Hameed, K.; Wu, S.; Schadt, C.W.; Labbé, J.; Tuskan, G.A.; Martin, F.; Grigoriev, I.V.; Vilgalys, R. Fungal Endophytes of <i>Populus trichocarpa</i> Alter Host Phenotype, Gene Expression, and Rhizobiome Composition. 2019, Mol Plant Microbe Interact 32(7):853-864	30699306	Ilyonectria_sp.	ilyonectria_sp.	positive
Infundibulicybe gibba	Basidiomycota	Agaricomycetes	Agaricales		JGI/Mycocosm	Cligib1	20/04/2021	Ruiz-Dueñas, F.J.; Barrasa, J.M.; Sánchez-García, M.; Camarero, S.; Miyauchi, S.; Serrano, A.; Linde, D.; Babiker, R.; Drula, E.; Ayuso-Fernández, I.; Pacheco, R.; Padilla, G.; Ferreira, P.; Barriuso, J.; Kellner, H.; Castanera, R.; Alfaro, M.; Ramírez, L.; Pisabarro, A.G.; Riley, R.; Kuo, A.; Andreopoulos, W.; LaButti, K.; Pangilinan, J.; Tritt, A.; Lipzen, A.; He, G.; Yan, M.; Ng, V.; Grigoriev…	33211093	Infundibulicybe_gibba	clitocybe_gibba_ijfm_a808	negative
Irpex lacteus	Basidiomycota	Agaricomycetes	Polyporales	Irpicaceae	JGI/Mycocosm	Irplac1	20/04/2021	Hage, H.; Miyauchi, S.; Virágh, M.; Drula, E.; Min, B.; Chaduli, D.; Navarro, D.; Favel, A.; Norest, M.; Lesage-Meessen, L.; Bálint, B.; Merényi, Z.; de Eugenio, L.; Morin, E.; Martínez, A.T.; Baldrian, P.; Štursová, M.; Martínez, M.J.; Novotny, C.; Magnuson, J.K.; Spatafora, J.W.; Maurice, S.; Pangilinan, J.; Andreopoulos, W.; LaButti, K.; Hundley, H.; Na, H.; Kuo, A.; Barry, K.; Lipzen, A.; Hen…	33538380	Irpex_lacteus	irpex_lacteus_ccbas_fr._238_617_93	negative
Jaapia argillacea MUCL 33604	Basidiomycota	Agaricomycetes	Jaapiales	Jaapiaceae	Ensembl/Fungi	GCA_000697665.1	02/07/2019	Riley, R.; Salamov, A.A.; Brown, D.W.; Nagy, L.G.; Floudas, D.; Held, B.W.; Levasseur, A.; Lombard, V.; Morin, E.; Otillar, R.; Lindquist, E.A.; Sun, H.; LaButti, K.M.; Schmutz, J.; Jabbour, D.; Luo, H.; Baker, S.E.; Pisabarro, A.G.; Walton, J.D.; Blanchette, R.A.; Henrissat, B.; Martin, F.; Cullen, D.; Hibbett, D.S.; Grigoriev, I.V. Extensive sampling of basidiomycete genomes demonstrates inadeq…	24958869	Jaapia_argillacea_MUCL_33604	jaapia_argillacea_mucl_33604_gca_000697665	negative
Jaminaea rosea	Basidiomycota	Exobasidiomycetes	Microstromatales		Ensembl/Fungi	GCA_003144245.1	02/07/2019	Kijpornyongpan, T.; Mondo, S.J.; Barry, K.; Sandor, L.; Lee, J.; Lipzen, A.; Pangilinan, J.; LaButti, K.; Hainaut, M.; Henrissat, B.; Grigoriev, I.V.; Spatafora, J.W.; Aime, M.C. Broad Genomic Sampling Reveals a Smut Pathogenic Ancestry of the Fungal Clade Ustilaginomycotina. 2018, Mol Biol Evol 35(8):1840-1854	29771364	Jaminaea_rosea	jaminaea_rosea_gca_003144245	negative
Jimgerdemannia flammicorona	Mucoromycota	Endogonomycetes	Endogonales	Endogonaceae	NCBI/GenBank	GCA_003990745.1	02/07/2019	Chang, Y.; Desirò, A.; Na, H.; Sandor, L.; Lipzen, A.; Clum, A.; Barry, K.; Grigoriev, I.V.; Martin, F.M.; Stajich, J.E.; Smith, M.E.; Bonito, G.; Spatafora, J.W. Phylogenomics of Endogonaceae and evolution of mycorrhizas within Mucoromycota. 2019, New Phytol 222(1):511-525	30485448	Jimgerdemannia_flammicorona	Jimgerdemannia_flammicorona	negative
Jimgerdemannia lactiflua	Mucoromycota	Endogonomycetes	Endogonales	Endogonaceae	JGI/Mycocosm	Jimlac1	01/06/2019	Chang, Y.; Desirò, A.; Na, H.; Sandor, L.; Lipzen, A.; Clum, A.; Barry, K.; Grigoriev, I.V.; Martin, F.M.; Stajich, J.E.; Smith, M.E.; Bonito, G.; Spatafora, J.W. Phylogenomics of Endogonaceae and evolution of mycorrhizas within Mucoromycota. 2019, New Phytol 222(1):511-525	30485448	Jimgerdemannia_lactiflua	jimgerdemannia_lactiflua_osc166217	negative
Kalaharituber pfeilii	Ascomycota	Pezizomycetes	Pezizales	Pezizaceae	JGI/Mycocosm	Kalpfe1	20/04/2021	Miyauchi, S.; Kiss, E.; Kuo, A.; Drula, E.; Kohler, A.; Sánchez-García, M.; Morin, E.; Andreopoulos, B.; Barry, K.W.; Bonito, G.; Buée, M.; Carver, A.; Chen, C.; Cichocki, N.; Clum, A.; Culley, D.; Crous, P.W.; Fauchery, L.; Girlanda, M.; Hayes, R.D.; Kéri, Z.; LaButti, K.; Lipzen, A.; Lombard, V.; Magnuson, J.; Maillard, F.; Murat, C.; Nolan, M.; Ohm, R.A.; Pangilinan, J.; Pereira, M.F.; Perotto…	33046698	Kalaharituber_pfeilii	kalaharituber_pfeilii_f3	negative
Kalmanozyma brasiliensis GHG001	Basidiomycota	Ustilaginomycetes	Ustilaginales	Ustilaginaceae	Ensembl/Fungi	GCA_000497045.1	02/07/2019	Oliveira, J.V.; Dos Santos, R.A.; Borges, T.A.; Riaño-Pachón, D.M.; Goldman, G.H. Draft Genome Sequence of Pseudozyma brasiliensis sp. nov. Strain GHG001, a High Producer of Endo-1,4-Xylanase Isolated from an Insect Pest of Sugarcane. 2013, Genome Announc 1(6):None	24356824	Kalmanozyma_brasiliensis_GHG001	kalmanozyma_brasiliensis_ghg001_gca_000497045	negative
Karstenula rhodostoma CBS 690.94	Ascomycota	Dothideomycetes	Pleosporales	Didymosphaeriaceae	JGI/Mycocosm	Karrh1	20/04/2021	Haridas, S.; Albert, R.; Binder, M.; Bloem, J.; LaButti, K.; Salamov, A.; Andreopoulos, B.; Baker, S.E.; Barry, K.; Bills, G.; Bluhm, B.H.; Cannon, C.; Castanera, R.; Culley, D.E.; Daum, C.; Ezra, D.; González, J.B.; Henrissat, B.; Kuo, A.; Liang, C.; Lipzen, A.; Lutzoni, F.; Magnuson, J.; Mondo, S.J.; Nolan, M.; Ohm, R.A.; Pangilinan, J.; Park, H.J.; Ramírez, L.; Alfaro, M.; Sun, H.; Tritt, A.; …	32206138	Karstenula_rhodostoma_CBS_690.94	karstenula_rhodostoma_cbs_690.94	negative
Kazachstania africana CBS 2517	Ascomycota	Saccharomycetes	Saccharomycetales	Saccharomycetaceae	Ensembl/Fungi	GCA_000304475.1	02/07/2019	Gordon, J.L.; Armisén, D.; Proux-Wéra, E.; ÓhÉigeartaigh, S.S.; Byrne, K.P.; Wolfe, K.H. Evolutionary erosion of yeast sex chromosomes by mating-type switching accidents. 2011, Proc Natl Acad Sci U S A 108(50):20024-9	22123960	Kazachstania_africana_CBS_2517	kazachstania_africana_cbs_2517_gca_000304475	negative
Kazachstania naganishii CBS 8797	Ascomycota	Saccharomycetes	Saccharomycetales	Saccharomycetaceae	Ensembl/Fungi	GCA_000348985.1	02/07/2019	Gordon, J.L.; Armisén, D.; Proux-Wéra, E.; ÓhÉigeartaigh, S.S.; Byrne, K.P.; Wolfe, K.H. Evolutionary erosion of yeast sex chromosomes by mating-type switching accidents. 2011, Proc Natl Acad Sci U S A 108(50):20024-9	22123960	Kazachstania_naganishii_CBS_8797	kazachstania_naganishii_cbs_8797_gca_000348985	negative
Kazachstania saulgeensis	Ascomycota	Saccharomycetes	Saccharomycetales	Saccharomycetaceae	NCBI/GenBank	GCA_900180425.1	01/06/2019	Sarilar, V.; Sterck, L.; Matsumoto, S.; Jacques, N.; Neuvéglise, C.; Tinsley, C.R.; Sicard, D.; Casaregola, S. Genome sequence of the type strain CLIB 1764<sup>T</sup> (= CBS 14374<sup>T</sup>) of the yeast species <i>Kazachstania saulgeensis</i> isolated from French organic sourdough. 2017, Genom Data 13(None):41-43	28725555	Kazachstania_saulgeensis	Kazachstania_saulgeensis	negative
Kluyveromyces lactis	Ascomycota	Saccharomycetes	Saccharomycetales	Saccharomycetaceae	Ensembl/Fungi	GCA_000002515.1	02/07/2019	Dujon, B.; Sherman, D.; Fischer, G.; Durrens, P.; Casaregola, S.; Lafontaine, I.; De Montigny, J.; Marck, C.; Neuvéglise, C.; Talla, E.; Goffard, N.; Frangeul, L.; Aigle, M.; Anthouard, V.; Babour, A.; Barbe, V.; Barnay, S.; Blanchin, S.; Beckerich, J.M.; Beyne, E.; Bleykasten, C.; Boisramé, A.; Boyer, J.; Cattolico, L.; Confanioleri, F.; De Daruvar, A.; Despons, L.; Fabre, E.; Fairhead, C.; Ferr…	15229592	Kluyveromyces_lactis	kluyveromyces_lactis_gca_000002515	negative
Kluyveromyces marxianus DMKU3-1042	Ascomycota	Saccharomycetes	Saccharomycetales	Saccharomycetaceae	Ensembl/Fungi	GCA_001417885.1	02/07/2019	Lertwattanasakul, N.; Kosaka, T.; Hosoyama, A.; Suzuki, Y.; Rodrussamee, N.; Matsutani, M.; Murata, M.; Fujimoto, N.; Suprayogi, N.o.n.e.; Tsuchikane, K.; Limtong, S.; Fujita, N.; Yamada, M. Genetic basis of the highly efficient yeast Kluyveromyces marxianus: complete genome sequence and transcriptome analyses. 2015, Biotechnol Biofuels 8(None):47	25834639	Kluyveromyces_marxianus_DMKU3-1042	kluyveromyces_marxianus_dmku3_1042_gca_001417885	negative
Kockovaella imperatae	Basidiomycota	Tremellomycetes	Tremellales	Cuniculitremaceae	Ensembl/Fungi	GCA_002102565.1	02/07/2019	Mondo, S.J.; Dannebaum, R.O.; Kuo, R.C.; Louie, K.B.; Bewick, A.J.; LaButti, K.; Haridas, S.; Kuo, A.; Salamov, A.; Ahrendt, S.R.; Lau, R.; Bowen, B.P.; Lipzen, A.; Sullivan, W.; Andreopoulos, B.B.; Clum, A.; Lindquist, E.; Daum, C.; Northen, T.R.; Kunde-Ramamoorthy, G.; Schmitz, R.J.; Gryganskyi, A.; Culley, D.; Magnuson, J.; James, T.Y.; O'Malley, M.A.; Stajich, J.E.; Spatafora, J.W.; Visel, A.…	28481340	Kockovaella_imperatae	kockovaella_imperatae_gca_002102565	negative
Komagataella pastoris	Ascomycota	Saccharomycetes	Saccharomycetales	Phaffomycetaceae	Ensembl/Fungi	GCA_001708105.1	02/07/2019	De Schutter, K.; Lin, Y.C.; Tiels, P.; Van Hecke, A.; Glinka, S.; Weber-Lehmann, J.; Rouzé, P.; Van de Peer, Y.; Callewaert, N. Genome sequence of the recombinant protein production host Pichia pastoris. 2009, Nat Biotechnol 27(6):561-6	19465926	Komagataella_pastoris	komagataella_pastoris_gca_001708105	negative
Kuraishia capsulata CBS 1993	Ascomycota	Saccharomycetes	Saccharomycetales		Ensembl/Fungi	GCA_000576695.1	02/07/2019	Morales, L.; Noel, B.; Porcel, B.; Marcet-Houben, M.; Hullo, M.F.; Sacerdot, C.; Tekaia, F.; Leh-Louis, V.; Despons, L.; Khanna, V.; Aury, J.M.; Barbe, V.; Couloux, A.; Labadie, K.; Pelletier, E.; Souciet, J.L.; Boekhout, T.; Gabaldon, T.; Wincker, P.; Dujon, B. Complete DNA sequence of Kuraishia capsulata illustrates novel genomic features among budding yeasts (Saccharomycotina). 2013, Genome Bi…	24317973	Kuraishia_capsulata_CBS_1993	kuraishia_capsulata_cbs_1993_gca_000576695	negative
Laccaria amethystina LaAM-08-1	Basidiomycota	Agaricomycetes	Agaricales	Tricholomataceae	Ensembl/Fungi	GCA_000827195.1	02/07/2019	Kohler, A.; Kuo, A.; Nagy, L.G.; Morin, E.; Barry, K.W.; Buscot, F.; Canbäck, B.; Choi, C.; Cichocki, N.; Clum, A.; Colpaert, J.; Copeland, A.; Costa, M.D.; Doré, J.; Floudas, D.; Gay, G.; Girlanda, M.; Henrissat, B.; Herrmann, S.; Hess, J.; Högberg, N.; Johansson, T.; Khouja, H.R.; LaButti, K.; Lahrmann, U.; Levasseur, A.; Lindquist, E.A.; Lipzen, A.; Marmeisse, R.; Martino, E.; Murat, C.; Ngan,…	25706625	Laccaria_amethystina_LaAM-08-1	laccaria_amethystina_laam_08_1_gca_000827195	negative
Laccaria bicolor	Basidiomycota	Agaricomycetes	Agaricales	Tricholomataceae	JGI/Mycocosm	Lacbi2	01/06/2019	Martin, F.; Aerts, A.; Ahrén, D.; Brun, A.; Danchin, E.G.; Duchaussoy, F.; Gibon, J.; Kohler, A.; Lindquist, E.; Pereda, V.; Salamov, A.; Shapiro, H.J.; Wuyts, J.; Blaudez, D.; Buée, M.; Brokstein, P.; Canbäck, B.; Cohen, D.; Courty, P.E.; Coutinho, P.M.; Delaruelle, C.; Detter, J.C.; Deveau, A.; DiFazio, S.; Duplessis, S.; Fraissinet-Tachet, L.; Lucic, E.; Frey-Klett, P.; Fourrey, C.; Feussner, …	18322534	Laccaria_bicolor	laccaria_bicolor	negative
Lachancea dasiensis	Ascomycota	Saccharomycetes	Saccharomycetales	Saccharomycetaceae	JGI/Mycocosm	Lacda1	20/04/2021	Vakirlis, N.; Sarilar, V.; Drillon, G.; Fleiss, A.; Agier, N.; Meyniel, J.P.; Blanpain, L.; Carbone, A.; Devillers, H.; Dubois, K.; Gillet-Markowska, A.; Graziani, S.; Huu-Vang, N.; Poirel, M.; Reisser, C.; Schott, J.; Schacherer, J.; Lafontaine, I.; Llorente, B.; Neuvéglise, C.; Fischer, G. Reconstruction of ancestral chromosome architecture and gene repertoire reveals principles of genome evolu…	27247244	Lachancea_dasiensis	lachancea_dasiensis_cbs_10888	negative
Lachancea fermentati	Ascomycota	Saccharomycetes	Saccharomycetales	Saccharomycetaceae	JGI/Mycocosm	Lacfe1	20/04/2021	Vakirlis, N.; Sarilar, V.; Drillon, G.; Fleiss, A.; Agier, N.; Meyniel, J.P.; Blanpain, L.; Carbone, A.; Devillers, H.; Dubois, K.; Gillet-Markowska, A.; Graziani, S.; Huu-Vang, N.; Poirel, M.; Reisser, C.; Schott, J.; Schacherer, J.; Lafontaine, I.; Llorente, B.; Neuvéglise, C.; Fischer, G. Reconstruction of ancestral chromosome architecture and gene repertoire reveals principles of genome evolu…	27247244	Lachancea_fermentati	lachancea_fermentati_inra_umr_1319	negative
Lachancea lanzarotensis	Ascomycota	Saccharomycetes	Saccharomycetales	Saccharomycetaceae	JGI/Mycocosm	Lacla1	20/04/2021	Sarilar, V.; Devillers, H.; Freel, K.C.; Schacherer, J.; Neuvéglise, C. Draft Genome Sequence of Lachancea lanzarotensis CBS 12615T, an Ascomycetous Yeast Isolated from Grapes. 2015, Genome Announc 3(2):None	25883293	Lachancea_lanzarotensis	lachancea_lanzarotensis_cbs_12615	negative
Lachancea meyersii CBS 8951	Ascomycota	Saccharomycetes	Saccharomycetales	Saccharomycetaceae	JGI/Mycocosm	Lacme1	20/04/2021	Vakirlis, N.; Sarilar, V.; Drillon, G.; Fleiss, A.; Agier, N.; Meyniel, J.P.; Blanpain, L.; Carbone, A.; Devillers, H.; Dubois, K.; Gillet-Markowska, A.; Graziani, S.; Huu-Vang, N.; Poirel, M.; Reisser, C.; Schott, J.; Schacherer, J.; Lafontaine, I.; Llorente, B.; Neuvéglise, C.; Fischer, G. Reconstruction of ancestral chromosome architecture and gene repertoire reveals principles of genome evolu…	27247244	Lachancea_meyersii_CBS_8951	lachancea_meyersii_cbs_8951	negative
Lachancea mirantina	Ascomycota	Saccharomycetes	Saccharomycetales	Saccharomycetaceae	JGI/Mycocosm	Lacmi1	20/04/2021	Vakirlis, N.; Sarilar, V.; Drillon, G.; Fleiss, A.; Agier, N.; Meyniel, J.P.; Blanpain, L.; Carbone, A.; Devillers, H.; Dubois, K.; Gillet-Markowska, A.; Graziani, S.; Huu-Vang, N.; Poirel, M.; Reisser, C.; Schott, J.; Schacherer, J.; Lafontaine, I.; Llorente, B.; Neuvéglise, C.; Fischer, G. Reconstruction of ancestral chromosome architecture and gene repertoire reveals principles of genome evolu…	27247244	Lachancea_mirantina	lachancea_mirantina_inra_umr_1319	negative
Lachancea nothofagi CBS 11611	Ascomycota	Saccharomycetes	Saccharomycetales	Saccharomycetaceae	JGI/Mycocosm	Lacno1	20/04/2021	Vakirlis, N.; Sarilar, V.; Drillon, G.; Fleiss, A.; Agier, N.; Meyniel, J.P.; Blanpain, L.; Carbone, A.; Devillers, H.; Dubois, K.; Gillet-Markowska, A.; Graziani, S.; Huu-Vang, N.; Poirel, M.; Reisser, C.; Schott, J.; Schacherer, J.; Lafontaine, I.; Llorente, B.; Neuvéglise, C.; Fischer, G. Reconstruction of ancestral chromosome architecture and gene repertoire reveals principles of genome evolu…	27247244	Lachancea_nothofagi_CBS_11611	lachancea_nothofagi_cbs_11611	negative
Lachancea quebecensis	Ascomycota	Saccharomycetes	Saccharomycetales	Saccharomycetaceae	JGI/Mycocosm	Lacqu1	20/04/2021	Freel, K.C.; Friedrich, A.; Sarilar, V.; Devillers, H.; Neuvéglise, C.; Schacherer, J. Whole-Genome Sequencing and Intraspecific Analysis of the Yeast Species Lachancea quebecensis. 2016, Genome Biol Evol 8(3):733-41	26733577	Lachancea_quebecensis	lachancea_quebecensis_inra_umr_1319	negative
Lachancea sp.	Ascomycota	Saccharomycetes	Saccharomycetales	Saccharomycetaceae	JGI/Mycocosm	LacCBS6924_1	20/04/2021	Vakirlis, N.; Sarilar, V.; Drillon, G.; Fleiss, A.; Agier, N.; Meyniel, J.P.; Blanpain, L.; Carbone, A.; Devillers, H.; Dubois, K.; Gillet-Markowska, A.; Graziani, S.; Huu-Vang, N.; Poirel, M.; Reisser, C.; Schott, J.; Schacherer, J.; Lafontaine, I.; Llorente, B.; Neuvéglise, C.; Fischer, G. Reconstruction of ancestral chromosome architecture and gene repertoire reveals principles of genome evolu…	27247244	Lachancea_sp.	lachancea_sp._cbs6924	negative
Lachancea thermotolerans CBS 6340	Ascomycota	Saccharomycetes	Saccharomycetales	Saccharomycetaceae	Ensembl/Fungi	GCA_000142805.1	02/07/2019	<UNKNOWN>, ; Souciet, J.L.; Dujon, B.; Gaillardin, C.; Johnston, M.; Baret, P.V.; Cliften, P.; Sherman, D.J.; Weissenbach, J.; Westhof, E.; Wincker, P.; Jubin, C.; Poulain, J.; Barbe, V.; Ségurens, B.; Artiguenave, F.; Anthouard, V.; Vacherie, B.; Val, M.E.; Fulton, R.S.; Minx, P.; Wilson, R.; Durrens, P.; Jean, G.; Marck, C.; Martin, T.; Nikolski, M.; Rolland, T.; Seret, M.L.; Casarégola, S.; De…	19525356	Lachancea_thermotolerans_CBS_6340	lachancea_thermotolerans_cbs_6340_gca_000142805	negative
Lactarius quietus	Basidiomycota	Agaricomycetes	Russulales	Russulaceae	JGI/Mycocosm	Lacqui1	20/04/2021	Miyauchi, S.; Kiss, E.; Kuo, A.; Drula, E.; Kohler, A.; Sánchez-García, M.; Morin, E.; Andreopoulos, B.; Barry, K.W.; Bonito, G.; Buée, M.; Carver, A.; Chen, C.; Cichocki, N.; Clum, A.; Culley, D.; Crous, P.W.; Fauchery, L.; Girlanda, M.; Hayes, R.D.; Kéri, Z.; LaButti, K.; Lipzen, A.; Lombard, V.; Magnuson, J.; Maillard, F.; Murat, C.; Nolan, M.; Ohm, R.A.; Pangilinan, J.; Pereira, M.F.; Perotto…	33046698	Lactarius_quietus	lactarius_quietus_s23c	negative
Laetiporus sulphureus 93-53	Basidiomycota	Agaricomycetes	Polyporales	Laetiporaceae	Ensembl/Fungi	GCA_001632365.1	02/07/2019	Nagy, L.G.; Riley, R.; Tritt, A.; Adam, C.; Daum, C.; Floudas, D.; Sun, H.; Yadav, J.S.; Pangilinan, J.; Larsson, K.H.; Matsuura, K.; Barry, K.; Labutti, K.; Kuo, R.; Ohm, R.A.; Bhattacharya, S.S.; Shirouzu, T.; Yoshinaga, Y.; Martin, F.M.; Grigoriev, I.V.; Hibbett, D.S. Comparative Genomics of Early-Diverging Mushroom-Forming Fungi Provides Insights into the Origins of Lignocellulose Decay Capab…	26659563	Laetiporus_sulphureus_93-53	laetiporus_sulphureus_93_53_gca_001632365	negative
Lasiodiplodia theobromae	Ascomycota	Dothideomycetes	Botryosphaeriales	Botryosphaeriaceae	NCBI/RefSeq	GCF_012971845.1	17/05/2021	Ali, S.S.; Asman, A.; Shao, J.; Balidion, J.F.; Strem, M.D.; Puig, A.S.; Meinhardt, L.W.; Bailey, B.A. Genome and transcriptome analysis of the latent pathogen <i>Lasiodiplodia theobromae</i>, an emerging threat to the cacao industry. 2020, Genome 63(1):37-52	31580730	Lasiodiplodia_theobromae	Lasiodiplodia_theobromae	positive
Leiotrametes lactinea	Basidiomycota	Agaricomycetes	Polyporales	Polyporaceae	JGI/Mycocosm	Tralac1	20/04/2021	Hage, H.; Miyauchi, S.; Virágh, M.; Drula, E.; Min, B.; Chaduli, D.; Navarro, D.; Favel, A.; Norest, M.; Lesage-Meessen, L.; Bálint, B.; Merényi, Z.; de Eugenio, L.; Morin, E.; Martínez, A.T.; Baldrian, P.; Štursová, M.; Martínez, M.J.; Novotny, C.; Magnuson, J.K.; Spatafora, J.W.; Maurice, S.; Pangilinan, J.; Andreopoulos, W.; LaButti, K.; Hundley, H.; Na, H.; Kuo, A.; Barry, K.; Lipzen, A.; Hen…	33538380	Leiotrametes_lactinea	leiotrametes_lactinea_cirm-brfm_1664	negative
Leiotrametes menziesii	Basidiomycota	Agaricomycetes	Polyporales	Polyporaceae	JGI/Mycocosm	Tramen1	20/04/2021	Hage, H.; Miyauchi, S.; Virágh, M.; Drula, E.; Min, B.; Chaduli, D.; Navarro, D.; Favel, A.; Norest, M.; Lesage-Meessen, L.; Bálint, B.; Merényi, Z.; de Eugenio, L.; Morin, E.; Martínez, A.T.; Baldrian, P.; Štursová, M.; Martínez, M.J.; Novotny, C.; Magnuson, J.K.; Spatafora, J.W.; Maurice, S.; Pangilinan, J.; Andreopoulos, W.; LaButti, K.; Hundley, H.; Na, H.; Kuo, A.; Barry, K.; Lipzen, A.; Hen…	33538380	Leiotrametes_menziesii	leiotrametes_menziesii_cirm-brfm_1781	negative
Leiotrametes sp. BRFM 1775	Basidiomycota	Agaricomycetes	Polyporales	Polyporaceae	JGI/Mycocosm	None	20/04/2021	Hage, H.; Miyauchi, S.; Virágh, M.; Drula, E.; Min, B.; Chaduli, D.; Navarro, D.; Favel, A.; Norest, M.; Lesage-Meessen, L.; Bálint, B.; Merényi, Z.; de Eugenio, L.; Morin, E.; Martínez, A.T.; Baldrian, P.; Štursová, M.; Martínez, M.J.; Novotny, C.; Magnuson, J.K.; Spatafora, J.W.; Maurice, S.; Pangilinan, J.; Andreopoulos, W.; LaButti, K.; Hundley, H.; Na, H.; Kuo, A.; Barry, K.; Lipzen, A.; Hen…	33538380	Leiotrametes_sp._BRFM_1775	leiotrametes_sp_brfm_1775	negative
Lentinula edodes	Basidiomycota	Agaricomycetes	Agaricales	Omphalotaceae	JGI/Mycocosm	LedB17_3	01/06/2019	Park, S.G.; Yoo, S.I.; Ryu, D.S.; Lee, H.; Ahn, Y.J.; Ryu, H.; Ko, J.; Hong, C.P. Long-read transcriptome data for improved gene prediction in <i>Lentinula edodes</i>. 2017, Data Brief 15(None):454-458	29845094	Lentinula_edodes	lentinula_edodes_b17	negative
Lentinula edodes	Basidiomycota	Agaricomycetes	Agaricales	Omphalotaceae	JGI/Mycocosm	Lened1	20/04/2021	Sakamoto, Y.; Nakade, K.; Sato, S.; Yoshida, K.; Miyazaki, K.; Natsume, S.; Konno, N. Lentinula edodes Genome Survey and Postharvest Transcriptome Analysis. 2017, Appl Environ Microbiol 83(10):None	28314725	Lentinula_edodes	lentinula_edodes_nbrc_111202	negative
Lentinula edodes	Basidiomycota	Agaricomycetes	Agaricales	Omphalotaceae	JGI/Mycocosm	Lentinedodes1	26/06/2019	Chen, L.; Gong, Y.; Cai, Y.; Liu, W.; Zhou, Y.; Xiao, Y.; Xu, Z.; Liu, Y.; Lei, X.; Wang, G.; Guo, M.; Ma, X.; Bian, Y. Genome Sequence of the Edible Cultivated Mushroom Lentinula edodes (Shiitake) Reveals Insights into Lignocellulose Degradation. 2016, PLoS One 11(8):e0160336	27500531	Lentinula_edodes	lentinula_edodes_w1-26	negative
Lentinus tigrinus ALCF2SS1-7	Basidiomycota	Agaricomycetes	Polyporales	Polyporaceae	NCBI/GenBank	GCA_003813185.1	02/07/2019	Wu, B.; Xu, Z.; Knudson, A.; Carlson, A.; Chen, N.; Kovaka, S.; LaButti, K.; Lipzen, A.; Pennachio, C.; Riley, R.; Schakwitz, W.; Umezawa, K.; Ohm, R.A.; Grigoriev, I.V.; Nagy, L.G.; Gibbons, J.; Hibbett, D. Genomics and Development of Lentinus tigrinus: A White-Rot Wood-Decaying Mushroom with Dimorphic Fruiting Bodies. 2018, Genome Biol Evol 10(12):3250-3261	30398645	Lentinus_tigrinus_ALCF2SS1-7	Lentinus_tigrinus	negative
Lentithecium fluviatile	Ascomycota	Dothideomycetes	Pleosporales	Lentitheciaceae	JGI/Mycocosm	Lenfl1	20/04/2021	Haridas, S.; Albert, R.; Binder, M.; Bloem, J.; LaButti, K.; Salamov, A.; Andreopoulos, B.; Baker, S.E.; Barry, K.; Bills, G.; Bluhm, B.H.; Cannon, C.; Castanera, R.; Culley, D.E.; Daum, C.; Ezra, D.; González, J.B.; Henrissat, B.; Kuo, A.; Liang, C.; Lipzen, A.; Lutzoni, F.; Magnuson, J.; Mondo, S.J.; Nolan, M.; Ohm, R.A.; Pangilinan, J.; Park, H.J.; Ramírez, L.; Alfaro, M.; Sun, H.; Tritt, A.; …	32206138	Lentithecium_fluviatile	lentithecium_fluviatile	positive
Lenzites betulinus	Basidiomycota	Agaricomycetes	Polyporales	Polyporaceae	JGI/Mycocosm	Trabet1	20/04/2021	Hage, H.; Miyauchi, S.; Virágh, M.; Drula, E.; Min, B.; Chaduli, D.; Navarro, D.; Favel, A.; Norest, M.; Lesage-Meessen, L.; Bálint, B.; Merényi, Z.; de Eugenio, L.; Morin, E.; Martínez, A.T.; Baldrian, P.; Štursová, M.; Martínez, M.J.; Novotny, C.; Magnuson, J.K.; Spatafora, J.W.; Maurice, S.; Pangilinan, J.; Andreopoulos, W.; LaButti, K.; Hundley, H.; Na, H.; Kuo, A.; Barry, K.; Lipzen, A.; Hen…	33538380	Lenzites_betulinus	trametes_betulina_cirm-brfm_1801	negative
Lepidopterella palustris CBS 459.81	Ascomycota	Dothideomycetes	Mytilinidiales	Argynnaceae	NCBI/GenBank	GCA_001692735.1	01/06/2019	Peter, M.; Kohler, A.; Ohm, R.A.; Kuo, A.; Krützmann, J.; Morin, E.; Arend, M.; Barry, K.W.; Binder, M.; Choi, C.; Clum, A.; Copeland, A.; Grisel, N.; Haridas, S.; Kipfer, T.; LaButti, K.; Lindquist, E.; Lipzen, A.; Maire, R.; Meier, B.; Mihaltcheva, S.; Molinier, V.; Murat, C.; Pöggeler, S.; Quandt, C.A.; Sperisen, C.; Tritt, A.; Tisserant, E.; Crous, P.W.; Henrissat, B.; Nehls, U.; Egli, S.; Sp…	27601008	Lepidopterella_palustris_CBS_459.81	Lepidopterella_palustris	negative
Lepista nuda	Basidiomycota	Agaricomycetes	Agaricales		JGI/Mycocosm	Lepnud1	20/04/2021	Ruiz-Dueñas, F.J.; Barrasa, J.M.; Sánchez-García, M.; Camarero, S.; Miyauchi, S.; Serrano, A.; Linde, D.; Babiker, R.; Drula, E.; Ayuso-Fernández, I.; Pacheco, R.; Padilla, G.; Ferreira, P.; Barriuso, J.; Kellner, H.; Castanera, R.; Alfaro, M.; Ramírez, L.; Pisabarro, A.G.; Riley, R.; Kuo, A.; Andreopoulos, W.; LaButti, K.; Pangilinan, J.; Tritt, A.; Lipzen, A.; He, G.; Yan, M.; Ng, V.; Grigoriev…	33211093	Lepista_nuda	lepista_nuda_cbs_247.69	negative
Leptosphaeria maculans JN3	Ascomycota	Dothideomycetes	Pleosporales	Leptosphaeriaceae	Ensembl/Fungi	GCA_000230375.1	02/07/2019	Rouxel, T.; Grandaubert, J.; Hane, J.K.; Hoede, C.; van de Wouw, A.P.; Couloux, A.; Dominguez, V.; Anthouard, V.; Bally, P.; Bourras, S.; Cozijnsen, A.J.; Ciuffetti, L.M.; Degrave, A.; Dilmaghani, A.; Duret, L.; Fudal, I.; Goodwin, S.B.; Gout, L.; Glaser, N.; Linglin, J.; Kema, G.H.; Lapalu, N.; Lawrence, C.B.; May, K.; Meyer, M.; Ollivier, B.; Poulain, J.; Schoch, C.L.; Simon, A.; Spatafora, J.W…	21326234	Leptosphaeria_maculans_JN3	leptosphaeria_maculans	negative
Letharia columbiana	Ascomycota	Lecanoromycetes	Lecanorales	Parmeliaceae	NCBI/RefSeq	GCF_014066305.1	17/05/2021	McKenzie, S.K.; Walston, R.F.; Allen, J.L. Complete, high-quality genomes from long-read metagenomic sequencing of two wolf lichen thalli reveals enigmatic genome architecture. 2020, Genomics 112(5):3150-3156	32504651	Letharia_columbiana	Letharia_columbiana	negative
Letharia lupina	Ascomycota	Lecanoromycetes	Lecanorales	Parmeliaceae	NCBI/RefSeq	GCF_014066315.1	17/05/2021	McKenzie, S.K.; Walston, R.F.; Allen, J.L. Complete, high-quality genomes from long-read metagenomic sequencing of two wolf lichen thalli reveals enigmatic genome architecture. 2020, Genomics 112(5):3150-3156	32504651	Letharia_lupina	Letharia_lupina	negative
Leucoagaricus gongylophorus	Basidiomycota	Agaricomycetes	Agaricales	Agaricaceae	JGI/Mycocosm	None	01/06/2019	Aylward, F.O.; Burnum-Johnson, K.E.; Tringe, S.G.; Teiling, C.; Tremmel, D.M.; Moeller, J.A.; Scott, J.J.; Barry, K.W.; Piehowski, P.D.; Nicora, C.D.; Malfatti, S.A.; Monroe, M.E.; Purvine, S.O.; Goodwin, L.A.; Smith, R.D.; Weinstock, G.M.; Gerardo, N.M.; Suen, G.; Lipton, M.S.; Currie, C.R. Leucoagaricus gongylophorus produces diverse enzymes for the degradation of recalcitrant plant polymers in…	23584789	Leucoagaricus_gongylophorus	leucoagaricus_gongylophorus	negative
Leucosporidium creatinivorum	Basidiomycota	Microbotryomycetes	Leucosporidiales	Leucosporidiaceae	Ensembl/Fungi	GCA_002105055.1	02/07/2019	Mondo, S.J.; Dannebaum, R.O.; Kuo, R.C.; Louie, K.B.; Bewick, A.J.; LaButti, K.; Haridas, S.; Kuo, A.; Salamov, A.; Ahrendt, S.R.; Lau, R.; Bowen, B.P.; Lipzen, A.; Sullivan, W.; Andreopoulos, B.B.; Clum, A.; Lindquist, E.; Daum, C.; Northen, T.R.; Kunde-Ramamoorthy, G.; Schmitz, R.J.; Gryganskyi, A.; Culley, D.; Magnuson, J.; James, T.Y.; O'Malley, M.A.; Stajich, J.E.; Spatafora, J.W.; Visel, A.…	28481340	Leucosporidium_creatinivorum	leucosporidium_creatinivorum_gca_002105055	negative
Lichtheimia corymbifera JMRC:FSU:9682	Mucoromycota	Mucoromycetes	Mucorales	Lichtheimiaceae	Ensembl/Fungi	GCA_000723665.1	02/07/2019	Schwartze, V.U.; Winter, S.; Shelest, E.; Marcet-Houben, M.; Horn, F.; Wehner, S.; Linde, J.; Valiante, V.; Sammeth, M.; Riege, K.; Nowrousian, M.; Kaerger, K.; Jacobsen, I.D.; Marz, M.; Brakhage, A.A.; Gabaldón, T.; Böcker, S.; Voigt, K. Gene expansion shapes genome architecture in the human pathogen Lichtheimia corymbifera: an evolutionary genomics analysis in the ancient terrestrial mucorales …	25121733	Lichtheimia_corymbifera_JMRC:FSU:9682	lichtheimia_corymbifera_jmrc_fsu_9682_gca_000723665	negative
Lichtheimia ramosa	Mucoromycota	Mucoromycetes	Mucorales	Lichtheimiaceae	Ensembl/Fungi	GCA_000945115.1	02/07/2019	Linde, J.; Schwartze, V.; Binder, U.; Lass-Flörl, C.; Voigt, K.; Horn, F. De Novo Whole-Genome Sequence and Genome Annotation of Lichtheimia ramosa. 2014, Genome Announc 2(5):None	25212617	Lichtheimia_ramosa	lichtheimia_ramosa_gca_000945115	negative
Linderina pennispora	Zoopagomycota	Kickxellomycetes	Kickxellales	Kickxellaceae	NCBI/GenBank	GCA_002104995.1	01/06/2019	Mondo, S.J.; Dannebaum, R.O.; Kuo, R.C.; Louie, K.B.; Bewick, A.J.; LaButti, K.; Haridas, S.; Kuo, A.; Salamov, A.; Ahrendt, S.R.; Lau, R.; Bowen, B.P.; Lipzen, A.; Sullivan, W.; Andreopoulos, B.B.; Clum, A.; Lindquist, E.; Daum, C.; Northen, T.R.; Kunde-Ramamoorthy, G.; Schmitz, R.J.; Gryganskyi, A.; Culley, D.; Magnuson, J.; James, T.Y.; O'Malley, M.A.; Stajich, J.E.; Spatafora, J.W.; Visel, A.…	28481340	Linderina_pennispora	Linderina_pennispora	negative
Lindgomyces ingoldianus	Ascomycota	Dothideomycetes	Pleosporales	Lindgomycetaceae	JGI/Mycocosm	Linin1	20/04/2021	Haridas, S.; Albert, R.; Binder, M.; Bloem, J.; LaButti, K.; Salamov, A.; Andreopoulos, B.; Baker, S.E.; Barry, K.; Bills, G.; Bluhm, B.H.; Cannon, C.; Castanera, R.; Culley, D.E.; Daum, C.; Ezra, D.; González, J.B.; Henrissat, B.; Kuo, A.; Liang, C.; Lipzen, A.; Lutzoni, F.; Magnuson, J.; Mondo, S.J.; Nolan, M.; Ohm, R.A.; Pangilinan, J.; Park, H.J.; Ramírez, L.; Alfaro, M.; Sun, H.; Tritt, A.; …	32206138	Lindgomyces_ingoldianus	lindgomyces_ingoldianus_atcc_200398	negative
Lineolata rhizophorae	Ascomycota	Dothideomycetes	Lineolatales	Lineolataceae	JGI/Mycocosm	Linrh1	20/04/2021	Haridas, S.; Albert, R.; Binder, M.; Bloem, J.; LaButti, K.; Salamov, A.; Andreopoulos, B.; Baker, S.E.; Barry, K.; Bills, G.; Bluhm, B.H.; Cannon, C.; Castanera, R.; Culley, D.E.; Daum, C.; Ezra, D.; González, J.B.; Henrissat, B.; Kuo, A.; Liang, C.; Lipzen, A.; Lutzoni, F.; Magnuson, J.; Mondo, S.J.; Nolan, M.; Ohm, R.A.; Pangilinan, J.; Park, H.J.; Ramírez, L.; Alfaro, M.; Sun, H.; Tritt, A.; …	32206138	Lineolata_rhizophorae	lineolata_rhizophorae_atcc_16933	negative
Lipomyces starkeyi NRRL Y-11557	Ascomycota	Saccharomycetes	Saccharomycetales	Lipomycetaceae	Ensembl/Fungi	GCA_001661325.1	02/07/2019	Riley, R.; Haridas, S.; Wolfe, K.H.; Lopes, M.R.; Hittinger, C.T.; Göker, M.; Salamov, A.A.; Wisecaver, J.H.; Long, T.M.; Calvey, C.H.; Aerts, A.L.; Barry, K.W.; Choi, C.; Clum, A.; Coughlan, A.Y.; Deshpande, S.; Douglass, A.P.; Hanson, S.J.; Klenk, H.P.; LaButti, K.M.; Lapidus, A.; Lindquist, E.A.; Lipzen, A.M.; Meier-Kolthoff, J.P.; Ohm, R.A.; Otillar, R.P.; Pangilinan, J.L.; Peng, Y.; Rokas, A…	27535936	Lipomyces_starkeyi_NRRL_Y-11557	lipomyces_starkeyi_nrrl_y_11557_gca_001661325	negative
Lizonia empirigonia	Ascomycota	Dothideomycetes		Pseudoperisporiaceae	JGI/Mycocosm	Lizem1	20/04/2021	Haridas, S.; Albert, R.; Binder, M.; Bloem, J.; LaButti, K.; Salamov, A.; Andreopoulos, B.; Baker, S.E.; Barry, K.; Bills, G.; Bluhm, B.H.; Cannon, C.; Castanera, R.; Culley, D.E.; Daum, C.; Ezra, D.; González, J.B.; Henrissat, B.; Kuo, A.; Liang, C.; Lipzen, A.; Lutzoni, F.; Magnuson, J.; Mondo, S.J.; Nolan, M.; Ohm, R.A.; Pangilinan, J.; Park, H.J.; Ramírez, L.; Alfaro, M.; Sun, H.; Tritt, A.; …	32206138	Lizonia_empirigonia	lizonia_empirigonia_cbs_542.76	negative
Lobosporangium transversale	Mucoromycota	Mortierellomycetes	Mortierellales	Mortierellaceae	Ensembl/Fungi	GCA_002105155.1	02/07/2019	Mondo, S.J.; Dannebaum, R.O.; Kuo, R.C.; Louie, K.B.; Bewick, A.J.; LaButti, K.; Haridas, S.; Kuo, A.; Salamov, A.; Ahrendt, S.R.; Lau, R.; Bowen, B.P.; Lipzen, A.; Sullivan, W.; Andreopoulos, B.B.; Clum, A.; Lindquist, E.; Daum, C.; Northen, T.R.; Kunde-Ramamoorthy, G.; Schmitz, R.J.; Gryganskyi, A.; Culley, D.; Magnuson, J.; James, T.Y.; O'Malley, M.A.; Stajich, J.E.; Spatafora, J.W.; Visel, A.…	28481340	Lobosporangium_transversale	lobosporangium_transversale_gca_002105155	negative
Lodderomyces elongisporus NRRL YB-4239	Ascomycota	Saccharomycetes	Saccharomycetales	Debaryomycetaceae	Ensembl/Fungi	GCA_000149685.1	02/07/2019	Butler, G.; Rasmussen, M.D.; Lin, M.F.; Santos, M.A.; Sakthikumar, S.; Munro, C.A.; Rheinbay, E.; Grabherr, M.; Forche, A.; Reedy, J.L.; Agrafioti, I.; Arnaud, M.B.; Bates, S.; Brown, A.J.; Brunke, S.; Costanzo, M.C.; Fitzpatrick, D.A.; de Groot, P.W.; Harris, D.; Hoyer, L.L.; Hube, B.; Klis, F.M.; Kodira, C.; Lennard, N.; Logue, M.E.; Martin, R.; Neiman, A.M.; Nikolaou, E.; Quail, M.A.; Quinn, J…	19465905	Lodderomyces_elongisporus_NRRL_YB-4239	lodderomyces_elongisporus_nrrl_yb_4239_gca_000149685	negative
Lomentospora prolificans	Ascomycota	Sordariomycetes	Microascales	Microascaceae	Ensembl/Fungi	GCA_002276285.1	02/07/2019	Luo, R.; Zimin, A.; Workman, R.; Fan, Y.; Pertea, G.; Grossman, N.; Wear, M.P.; Jia, B.; Miller, H.; Casadevall, A.; Timp, W.; Zhang, S.X.; Salzberg, S.L. First Draft Genome Sequence of the Pathogenic Fungus <i>Lomentospora prolificans</i> (Formerly <i>Scedosporium prolificans</i>). 2017, G3 (Bethesda) 7(11):3831-3836	28963165	Lomentospora_prolificans	lomentospora_prolificans_gca_002276285	negative
Lophiostoma macrostomum	Ascomycota	Dothideomycetes	Pleosporales	Lophiostomataceae	JGI/Mycocosm	Lopma1	20/04/2021	Haridas, S.; Albert, R.; Binder, M.; Bloem, J.; LaButti, K.; Salamov, A.; Andreopoulos, B.; Baker, S.E.; Barry, K.; Bills, G.; Bluhm, B.H.; Cannon, C.; Castanera, R.; Culley, D.E.; Daum, C.; Ezra, D.; González, J.B.; Henrissat, B.; Kuo, A.; Liang, C.; Lipzen, A.; Lutzoni, F.; Magnuson, J.; Mondo, S.J.; Nolan, M.; Ohm, R.A.; Pangilinan, J.; Park, H.J.; Ramírez, L.; Alfaro, M.; Sun, H.; Tritt, A.; …	32206138	Lophiostoma_macrostomum	lophiostoma_macrostomum	negative
Lophiotrema nucula	Ascomycota	Dothideomycetes	Pleosporales	Lophiotremataceae	JGI/Mycocosm	Lopnu1	20/04/2021	Haridas, S.; Albert, R.; Binder, M.; Bloem, J.; LaButti, K.; Salamov, A.; Andreopoulos, B.; Baker, S.E.; Barry, K.; Bills, G.; Bluhm, B.H.; Cannon, C.; Castanera, R.; Culley, D.E.; Daum, C.; Ezra, D.; González, J.B.; Henrissat, B.; Kuo, A.; Liang, C.; Lipzen, A.; Lutzoni, F.; Magnuson, J.; Mondo, S.J.; Nolan, M.; Ohm, R.A.; Pangilinan, J.; Park, H.J.; Ramírez, L.; Alfaro, M.; Sun, H.; Tritt, A.; …	32206138	Lophiotrema_nucula	lophiotrema_nucula_cbs_627.86	negative
Lophium mytilinum CBS 269.34	Ascomycota	Dothideomycetes	Mytilinidiales	Mytilinidiaceae	JGI/Mycocosm	Lopmy1	20/04/2021	Haridas, S.; Albert, R.; Binder, M.; Bloem, J.; LaButti, K.; Salamov, A.; Andreopoulos, B.; Baker, S.E.; Barry, K.; Bills, G.; Bluhm, B.H.; Cannon, C.; Castanera, R.; Culley, D.E.; Daum, C.; Ezra, D.; González, J.B.; Henrissat, B.; Kuo, A.; Liang, C.; Lipzen, A.; Lutzoni, F.; Magnuson, J.; Mondo, S.J.; Nolan, M.; Ohm, R.A.; Pangilinan, J.; Park, H.J.; Ramírez, L.; Alfaro, M.; Sun, H.; Tritt, A.; …	32206138	Lophium_mytilinum_CBS_269.34	lophium_mytilinum_cbs_269.34	negative
Lyophyllum atratum	Basidiomycota	Agaricomycetes	Agaricales	Lyophyllaceae	JGI/Mycocosm	Lyoat1	20/04/2021	Steindorff, A.S.; Carver, A.; Calhoun, S.; Stillman, K.; Liu, H.; Lipzen, A.; He, G.; Yan, M.; Pangilinan, J.; LaButti, K.; Ng, V.; Bruns, T.D.; Grigoriev, I.V. Comparative genomics of pyrophilous fungi reveals a link between fire events and developmental genes. 2021, Environ Microbiol 23(1):99-109	33034064	Lyophyllum_atratum	lyophyllum_atratum_cbs_144462	negative
Macrolepiota fuliginosa MF-IS2	Basidiomycota	Agaricomycetes	Agaricales	Agaricaceae	JGI/Mycocosm	Macfu1	20/04/2021	Ruiz-Dueñas, F.J.; Barrasa, J.M.; Sánchez-García, M.; Camarero, S.; Miyauchi, S.; Serrano, A.; Linde, D.; Babiker, R.; Drula, E.; Ayuso-Fernández, I.; Pacheco, R.; Padilla, G.; Ferreira, P.; Barriuso, J.; Kellner, H.; Castanera, R.; Alfaro, M.; Ramírez, L.; Pisabarro, A.G.; Riley, R.; Kuo, A.; Andreopoulos, W.; LaButti, K.; Pangilinan, J.; Tritt, A.; Lipzen, A.; He, G.; Yan, M.; Ng, V.; Grigoriev…	33211093	Macrolepiota_fuliginosa_MF-IS2	macrolepiota_fuliginosa_mf-is2	negative
Macrophomina phaseolina MS6	Ascomycota	Dothideomycetes	Botryosphaeriales	Botryosphaeriaceae	Ensembl/Fungi	GCA_000302655.1	02/07/2019	Islam, M.S.; Haque, M.S.; Islam, M.M.; Emdad, E.M.; Halim, A.; Hossen, Q.M.; Hossain, M.Z.; Ahmed, B.; Rahim, S.; Rahman, M.S.; Alam, M.M.; Hou, S.; Wan, X.; Saito, J.A.; Alam, M. Tools to kill: genome of one of the most destructive plant pathogenic fungi Macrophomina phaseolina. 2012, BMC Genomics 13(None):493	22992219	Macrophomina_phaseolina_MS6	macrophomina_phaseolina_ms6_gca_000302655	negative
Macroventuria anomochaeta CBS 525.71	Ascomycota	Dothideomycetes	Pleosporales	Didymellaceae	JGI/Mycocosm	Macan1	20/04/2021	Haridas, S.; Albert, R.; Binder, M.; Bloem, J.; LaButti, K.; Salamov, A.; Andreopoulos, B.; Baker, S.E.; Barry, K.; Bills, G.; Bluhm, B.H.; Cannon, C.; Castanera, R.; Culley, D.E.; Daum, C.; Ezra, D.; González, J.B.; Henrissat, B.; Kuo, A.; Liang, C.; Lipzen, A.; Lutzoni, F.; Magnuson, J.; Mondo, S.J.; Nolan, M.; Ohm, R.A.; Pangilinan, J.; Park, H.J.; Ramírez, L.; Alfaro, M.; Sun, H.; Tritt, A.; …	32206138	Macroventuria_anomochaeta_CBS_525.71	macroventuria_anomochaeta_cbs_525.71	negative
Madurella mycetomatis	Ascomycota	Sordariomycetes	Sordariales		Ensembl/Fungi	GCA_001275765.2	02/07/2019	Smit, S.; Derks, M.F.; Bervoets, S.; Fahal, A.; van Leeuwen, W.; van Belkum, A.; van de Sande, W.W. Genome Sequence of Madurella mycetomatis mm55, Isolated from a Human Mycetoma Case in Sudan. 2016, Genome Announc 4(3):None	27231361	Madurella_mycetomatis	madurella_mycetomatis_gca_001275765	negative
Magnaporthiopsis poae ATCC 64411	Ascomycota	Sordariomycetes	Magnaporthales	Magnaporthaceae	Ensembl/Fungi	GCA_000193285.1	02/07/2019	Okagaki, L.H.; Nunes, C.C.; Sailsbery, J.; Clay, B.; Brown, D.; John, T.; Oh, Y.; Young, N.; Fitzgerald, M.; Haas, B.J.; Zeng, Q.; Young, S.; Adiconis, X.; Fan, L.; Levin, J.Z.; Mitchell, T.K.; Okubara, P.A.; Farman, M.L.; Kohn, L.M.; Birren, B.; Ma, L.J.; Dean, R.A. Genome Sequences of Three Phytopathogenic Species of the Magnaporthaceae Family of Fungi. 2015, G3 (Bethesda) 5(12):2539-45	26416668	Magnaporthiopsis_poae_ATCC_64411	magnaporthe_poae	negative
Malassezia globosa CBS 7966	Basidiomycota	Malasseziomycetes	Malasseziales	Malasseziaceae	Ensembl/Fungi	GCA_000181695.1	02/07/2019	Xu, J.; Saunders, C.W.; Hu, P.; Grant, R.A.; Boekhout, T.; Kuramae, E.E.; Kronstad, J.W.; Deangelis, Y.M.; Reeder, N.L.; Johnstone, K.R.; Leland, M.; Fieno, A.M.; Begley, W.M.; Sun, Y.; Lacey, M.P.; Chaudhary, T.; Keough, T.; Chu, L.; Sears, R.; Yuan, B.; Dawson, T.L. Dandruff-associated Malassezia genomes reveal convergent and divergent virulence traits shared with plant and human fungal pathoge…	18000048	Malassezia_globosa_CBS_7966	malassezia_globosa_cbs_7966_gca_000181695	negative
Malassezia pachydermatis	Basidiomycota	Malasseziomycetes	Malasseziales	Malasseziaceae	Ensembl/Fungi	GCA_001278385.1	02/07/2019	Triana, S.; González, A.; Ohm, R.A.; Wösten, H.A.; de Cock, H.; Restrepo, S.; Celis, A. Draft Genome Sequence of the Animal and Human Pathogen Malassezia pachydermatis Strain CBS 1879. 2015, Genome Announc 3(5):None	26472839	Malassezia_pachydermatis	malassezia_pachydermatis_gca_001278385	negative
Malassezia restricta	Basidiomycota	Malasseziomycetes	Malasseziales	Malasseziaceae	NCBI/RefSeq	GCF_003290485.1	01/07/2019	Park, M.; Cho, Y.J.; Lee, Y.W.; Jung, W.H. Whole genome sequencing analysis of the cutaneous pathogenic yeast Malassezia restricta and identification of the major lipase expressed on the scalp of patients with dandruff. 2017, Mycoses 60(3):188-197	27882618	Malassezia_restricta	Malassezia_restricta	negative
Malassezia sympodialis ATCC 42132	Basidiomycota	Malasseziomycetes	Malasseziales	Malasseziaceae	NCBI/RefSeq	GCF_000349305.1	01/06/2019	Gioti, A.; Nystedt, B.; Li, W.; Xu, J.; Andersson, A.; Averette, A.F.; Münch, K.; Wang, X.; Kappauf, C.; Kingsbury, J.M.; Kraak, B.; Walker, L.A.; Johansson, H.J.; Holm, T.; Lehtiö, J.; Stajich, J.E.; Mieczkowski, P.; Kahmann, R.; Kennell, J.C.; Cardenas, M.E.; Lundeberg, J.; Saunders, C.W.; Boekhout, T.; Dawson, T.L.; Munro, C.A.; de Groot, P.W.; Butler, G.; Heitman, J.; Scheynius, A. Genomic in…	23341551	Malassezia_sympodialis_ATCC_42132	Malassezia_sympodialis	negative
Malassezia vespertilionis	Basidiomycota	Malasseziomycetes	Malasseziales	Malasseziaceae	Ensembl/Fungi	GCA_002818225.1	02/07/2019	Lorch, J.M.; Palmer, J.M.; Vanderwolf, K.J.; Schmidt, K.Z.; Verant, M.L.; Weller, T.J.; Blehert, D.S. <i>Malassezia vespertilionis</i> sp. nov.: a new cold-tolerant species of yeast isolated from bats. 2018, Persoonia 41(None):56-70	30728599	Malassezia_vespertilionis	malassezia_vespertilionis_gca_002818225	negative
Marasmius fiardii PR-910	Basidiomycota	Agaricomycetes	Agaricales	Marasmiaceae	JGI/Mycocosm	Marfi1	20/04/2021	Miyauchi, S.; Kiss, E.; Kuo, A.; Drula, E.; Kohler, A.; Sánchez-García, M.; Morin, E.; Andreopoulos, B.; Barry, K.W.; Bonito, G.; Buée, M.; Carver, A.; Chen, C.; Cichocki, N.; Clum, A.; Culley, D.; Crous, P.W.; Fauchery, L.; Girlanda, M.; Hayes, R.D.; Kéri, Z.; LaButti, K.; Lipzen, A.; Lombard, V.; Magnuson, J.; Maillard, F.; Murat, C.; Nolan, M.; Ohm, R.A.; Pangilinan, J.; Pereira, M.F.; Perotto…	33046698	Marasmius_fiardii_PR-910	marasmius_fiardii_pr-910	negative
Marssonina brunnea f. sp. multigermtubi MB_m1	Ascomycota	Leotiomycetes	Helotiales	Dermateaceae	Ensembl/Fungi	GCA_000298775.1	02/07/2019	Zhu, S.; Cao, Y.Z.; Jiang, C.; Tan, B.Y.; Wang, Z.; Feng, S.; Zhang, L.; Su, X.H.; Brejova, B.; Vinar, T.; Xu, M.; Wang, M.X.; Zhang, S.G.; Huang, M.R.; Wu, R.; Zhou, Y. Sequencing the genome of Marssonina brunnea reveals fungus-poplar co-evolution. 2012, BMC Genomics 13(None):382	22876864	Marssonina_brunnea_f._sp._multigermtubi_MB_m1	marssonina_brunnea_f_sp_multigermtubi_mb_m1_gca_000298775	negative
Massarina eburnea CBS 473.64	Ascomycota	Dothideomycetes	Pleosporales	Massarinaceae	JGI/Mycocosm	Maseb1	20/04/2021	Haridas, S.; Albert, R.; Binder, M.; Bloem, J.; LaButti, K.; Salamov, A.; Andreopoulos, B.; Baker, S.E.; Barry, K.; Bills, G.; Bluhm, B.H.; Cannon, C.; Castanera, R.; Culley, D.E.; Daum, C.; Ezra, D.; González, J.B.; Henrissat, B.; Kuo, A.; Liang, C.; Lipzen, A.; Lutzoni, F.; Magnuson, J.; Mondo, S.J.; Nolan, M.; Ohm, R.A.; Pangilinan, J.; Park, H.J.; Ramírez, L.; Alfaro, M.; Sun, H.; Tritt, A.; …	32206138	Massarina_eburnea_CBS_473.64	massarina_eburnea_cbs_473.64	negative
Massariosphaeria phaeospora	Ascomycota	Dothideomycetes	Pleosporales		JGI/Mycocosm	Masph1	20/04/2021	Haridas, S.; Albert, R.; Binder, M.; Bloem, J.; LaButti, K.; Salamov, A.; Andreopoulos, B.; Baker, S.E.; Barry, K.; Bills, G.; Bluhm, B.H.; Cannon, C.; Castanera, R.; Culley, D.E.; Daum, C.; Ezra, D.; González, J.B.; Henrissat, B.; Kuo, A.; Liang, C.; Lipzen, A.; Lutzoni, F.; Magnuson, J.; Mondo, S.J.; Nolan, M.; Ohm, R.A.; Pangilinan, J.; Park, H.J.; Ramírez, L.; Alfaro, M.; Sun, H.; Tritt, A.; …	32206138	Massariosphaeria_phaeospora	massariosphaeria_phaeospora_cbs_611.86	negative
Meira miltonrushii	Basidiomycota	Exobasidiomycetes	Exobasidiales	Brachybasidiaceae	Ensembl/Fungi	GCA_003144205.1	02/07/2019	Kijpornyongpan, T.; Mondo, S.J.; Barry, K.; Sandor, L.; Lee, J.; Lipzen, A.; Pangilinan, J.; LaButti, K.; Hainaut, M.; Henrissat, B.; Grigoriev, I.V.; Spatafora, J.W.; Aime, M.C. Broad Genomic Sampling Reveals a Smut Pathogenic Ancestry of the Fungal Clade Ustilaginomycotina. 2018, Mol Biol Evol 35(8):1840-1854	29771364	Meira_miltonrushii	meira_miltonrushii_gca_003144205	negative
Melampsora larici-populina 98AG31	Basidiomycota	Pucciniomycetes	Pucciniales	Melampsoraceae	Ensembl/Fungi	GCA_000204055.1	02/07/2019	Duplessis, S.; Cuomo, C.A.; Lin, Y.C.; Aerts, A.; Tisserant, E.; Veneault-Fourrey, C.; Joly, D.L.; Hacquard, S.; Amselem, J.; Cantarel, B.L.; Chiu, R.; Coutinho, P.M.; Feau, N.; Field, M.; Frey, P.; Gelhaye, E.; Goldberg, J.; Grabherr, M.G.; Kodira, C.D.; Kohler, A.; Kües, U.; Lindquist, E.A.; Lucas, S.M.; Mago, R.; Mauceli, E.; Morin, E.; Murat, C.; Pangilinan, J.L.; Park, R.; Pearson, M.; Quesn…	21536894	Melampsora_larici-populina_98AG31	melampsora_laricipopulina	negative
Melampsora lini	Basidiomycota	Pucciniomycetes	Pucciniales	Melampsoraceae	JGI/Mycocosm	Melli1	01/06/2019	Nemri, A.; Saunders, D.G.; Anderson, C.; Upadhyaya, N.M.; Win, J.; Lawrence, G.J.; Jones, D.A.; Kamoun, S.; Ellis, J.G.; Dodds, P.N. The genome sequence and effector complement of the flax rust pathogen Melampsora lini. 2014, Front Plant Sci 5(None):98	24715894	Melampsora_lini	melampsora_lini_ch5	negative
Melanogaster broomeianus MBLB.BST	Basidiomycota	Agaricomycetes	Boletales	Melanogastraceae	JGI/Mycocosm	Melbro1	20/04/2021	Miyauchi, S.; Kiss, E.; Kuo, A.; Drula, E.; Kohler, A.; Sánchez-García, M.; Morin, E.; Andreopoulos, B.; Barry, K.W.; Bonito, G.; Buée, M.; Carver, A.; Chen, C.; Cichocki, N.; Clum, A.; Culley, D.; Crous, P.W.; Fauchery, L.; Girlanda, M.; Hayes, R.D.; Kéri, Z.; LaButti, K.; Lipzen, A.; Lombard, V.; Magnuson, J.; Maillard, F.; Murat, C.; Nolan, M.; Ohm, R.A.; Pangilinan, J.; Pereira, M.F.; Perotto…	33046698	Melanogaster_broomeianus_MBLB.BST	melanogaster_broomeianus_mblb.bst	negative
Melanomma pulvis-pyrius	Ascomycota	Dothideomycetes	Pleosporales	Melanommataceae	JGI/Mycocosm	Melpu1	20/04/2021	Haridas, S.; Albert, R.; Binder, M.; Bloem, J.; LaButti, K.; Salamov, A.; Andreopoulos, B.; Baker, S.E.; Barry, K.; Bills, G.; Bluhm, B.H.; Cannon, C.; Castanera, R.; Culley, D.E.; Daum, C.; Ezra, D.; González, J.B.; Henrissat, B.; Kuo, A.; Liang, C.; Lipzen, A.; Lutzoni, F.; Magnuson, J.; Mondo, S.J.; Nolan, M.; Ohm, R.A.; Pangilinan, J.; Park, H.J.; Ramírez, L.; Alfaro, M.; Sun, H.; Tritt, A.; …	32206138	Melanomma_pulvis-pyrius	melanomma_pulvis-pyrius	negative
Meliniomyces bicolor E	Ascomycota	Leotiomycetes	Helotiales	Hyaloscyphaceae	Ensembl/Fungi	GCA_002865645.1	02/07/2019	Martino, E.; Morin, E.; Grelet, G.A.; Kuo, A.; Kohler, A.; Daghino, S.; Barry, K.W.; Cichocki, N.; Clum, A.; Dockter, R.B.; Hainaut, M.; Kuo, R.C.; LaButti, K.; Lindahl, B.D.; Lindquist, E.A.; Lipzen, A.; Khouja, H.R.; Magnuson, J.; Murat, C.; Ohm, R.A.; Singer, S.W.; Spatafora, J.W.; Wang, M.; Veneault-Fourrey, C.; Henrissat, B.; Grigoriev, I.V.; Martin, F.M.; Perotto, S. Comparative genomics an…	29315638	Meliniomyces_bicolor_E	meliniomyces_bicolor_e_gca_002865645	negative
Metarhizium acridum CQMa 102	Ascomycota	Sordariomycetes	Hypocreales	Clavicipitaceae	Ensembl/Fungi	GCA_000187405.1	02/07/2019	Gao, Q.; Jin, K.; Ying, S.H.; Zhang, Y.; Xiao, G.; Shang, Y.; Duan, Z.; Hu, X.; Xie, X.Q.; Zhou, G.; Peng, G.; Luo, Z.; Huang, W.; Wang, B.; Fang, W.; Wang, S.; Zhong, Y.; Ma, L.J.; St Leger, R.J.; Zhao, G.P.; Pei, Y.; Feng, M.G.; Xia, Y.; Wang, C. Genome sequencing and comparative transcriptomics of the model entomopathogenic fungi Metarhizium anisopliae and M. acridum. 2011, PLoS Genet 7(1):e10…	21253567	Metarhizium_acridum_CQMa_102	metarhizium_acridum_cqma_102_gca_000187405	negative
Metarhizium album ARSEF 1941	Ascomycota	Sordariomycetes	Hypocreales	Clavicipitaceae	Ensembl/Fungi	GCA_000804445.1	02/07/2019	Hu, X.; Xiao, G.; Zheng, P.; Shang, Y.; Su, Y.; Zhang, X.; Liu, X.; Zhan, S.; St Leger, R.J.; Wang, C. Trajectory and genomic determinants of fungal-pathogen speciation and host adaptation. 2014, Proc Natl Acad Sci U S A 111(47):16796-801	25368161	Metarhizium_album_ARSEF_1941	metarhizium_album_arsef_1941_gca_000804445	negative
Metarhizium anisopliae BRIP 53293	Ascomycota	Sordariomycetes	Hypocreales	Clavicipitaceae	Ensembl/Fungi	GCA_000426965.1	02/07/2019	Pattemore, J.A.; Hane, J.K.; Williams, A.H.; Wilson, B.A.; Stodart, B.J.; Ash, G.J. The genome sequence of the biocontrol fungus Metarhizium anisopliae and comparative genomics of Metarhizium species. 2014, BMC Genomics 15(None):660	25102932	Metarhizium_anisopliae_BRIP_53293	metarhizium_anisopliae_brip_53293_gca_000426965	negative
Metarhizium brunneum ARSEF 3297	Ascomycota	Sordariomycetes	Hypocreales	Clavicipitaceae	Ensembl/Fungi	GCA_000814965.1	02/07/2019	Hu, X.; Xiao, G.; Zheng, P.; Shang, Y.; Su, Y.; Zhang, X.; Liu, X.; Zhan, S.; St Leger, R.J.; Wang, C. Trajectory and genomic determinants of fungal-pathogen speciation and host adaptation. 2014, Proc Natl Acad Sci U S A 111(47):16796-801	25368161	Metarhizium_brunneum_ARSEF_3297	metarhizium_brunneum_arsef_3297_gca_000814965	negative
Metarhizium guizhouense ARSEF 977	Ascomycota	Sordariomycetes	Hypocreales	Clavicipitaceae	Ensembl/Fungi	GCA_000814955.1	02/07/2019	Hu, X.; Xiao, G.; Zheng, P.; Shang, Y.; Su, Y.; Zhang, X.; Liu, X.; Zhan, S.; St Leger, R.J.; Wang, C. Trajectory and genomic determinants of fungal-pathogen speciation and host adaptation. 2014, Proc Natl Acad Sci U S A 111(47):16796-801	25368161	Metarhizium_guizhouense_ARSEF_977	metarhizium_guizhouense_arsef_977_gca_000814955	negative
Metarhizium majus ARSEF 297	Ascomycota	Sordariomycetes	Hypocreales	Clavicipitaceae	Ensembl/Fungi	GCA_000814945.1	02/07/2019	Hu, X.; Xiao, G.; Zheng, P.; Shang, Y.; Su, Y.; Zhang, X.; Liu, X.; Zhan, S.; St Leger, R.J.; Wang, C. Trajectory and genomic determinants of fungal-pathogen speciation and host adaptation. 2014, Proc Natl Acad Sci U S A 111(47):16796-801	25368161	Metarhizium_majus_ARSEF_297	metarhizium_majus_arsef_297_gca_000814945	negative
Metarhizium rileyi RCEF 4871	Ascomycota	Sordariomycetes	Hypocreales	Clavicipitaceae	Ensembl/Fungi	GCA_001636745.1	02/07/2019	Shang, Y.; Xiao, G.; Zheng, P.; Cen, K.; Zhan, S.; Wang, C. Divergent and Convergent Evolution of Fungal Pathogenicity. 2016, Genome Biol Evol 8(5):1374-87	27071652	Metarhizium_rileyi_RCEF_4871	metarhizium_rileyi_rcef_4871_gca_001636745	negative
Metarhizium robertsii ARSEF 23	Ascomycota	Sordariomycetes	Hypocreales	Clavicipitaceae	NCBI/RefSeq	GCF_000187425.2	01/06/2019	Hu, X.; Xiao, G.; Zheng, P.; Shang, Y.; Su, Y.; Zhang, X.; Liu, X.; Zhan, S.; St Leger, R.J.; Wang, C. Trajectory and genomic determinants of fungal-pathogen speciation and host adaptation. 2014, Proc Natl Acad Sci U S A 111(47):16796-801	25368161	Metarhizium_robertsii_ARSEF_23	Metarhizium_robertsii	negative
Metschnikowia aff. pulcherrima	Ascomycota	Saccharomycetes	Saccharomycetales	Metschnikowiaceae	NCBI/GenBank	GCA_004217705.1	17/05/2021	Gore-Lloyd, D.; Sumann, I.; Brachmann, A.O.; Schneeberger, K.; Ortiz-Merino, R.A.; Moreno-Beltrán, M.; Schläfli, M.; Kirner, P.; Santos Kron, A.; Rueda-Mejia, M.P.; Somerville, V.; Wolfe, K.H.; Piel, J.; Ahrens, C.H.; Henk, D.; Freimoser, F.M. Snf2 controls pulcherriminic acid biosynthesis and antifungal activity of the biocontrol yeast Metschnikowia pulcherrima. 2019, Mol Microbiol 112(1):317-332	31081214	Metschnikowia_aff._pulcherrima	Metschnikowia_aff._pulcherrima	negative
Metschnikowia bicuspidata var. bicuspidata NRRL YB-4993	Ascomycota	Saccharomycetes	Saccharomycetales	Metschnikowiaceae	Ensembl/Fungi	GCA_001664035.1	02/07/2019	Riley, R.; Haridas, S.; Wolfe, K.H.; Lopes, M.R.; Hittinger, C.T.; Göker, M.; Salamov, A.A.; Wisecaver, J.H.; Long, T.M.; Calvey, C.H.; Aerts, A.L.; Barry, K.W.; Choi, C.; Clum, A.; Coughlan, A.Y.; Deshpande, S.; Douglass, A.P.; Hanson, S.J.; Klenk, H.P.; LaButti, K.M.; Lapidus, A.; Lindquist, E.A.; Lipzen, A.M.; Meier-Kolthoff, J.P.; Ohm, R.A.; Otillar, R.P.; Pangilinan, J.L.; Peng, Y.; Rokas, A…	27535936	Metschnikowia_bicuspidata_var._bicuspidata_NRRL_YB-4993	metschnikowia_bicuspidata_var_bicuspidata_nrrl_yb_4993_gca_001664035	negative
Metschnikowia fructicola 277	Ascomycota	Saccharomycetes	Saccharomycetales	Metschnikowiaceae	JGI/Mycocosm	Metfru2	01/06/2019	Hershkovitz, V.; Sela, N.; Taha-Salaime, L.; Liu, J.; Rafael, G.; Kessler, C.; Aly, R.; Levy, M.; Wisniewski, M.; Droby, S. De-novo assembly and characterization of the transcriptome of Metschnikowia fructicola reveals differences in gene expression following interaction with Penicillium digitatum and grapefruit peel. 2013, BMC Genomics 14(None):168	23496978	Metschnikowia_fructicola_277	metschnikowia_fructicola_277	negative
Meyerozyma guilliermondii ATCC 6260	Ascomycota	Saccharomycetes	Saccharomycetales	Debaryomycetaceae	Ensembl/Fungi	GCA_000149425.1	02/07/2019	Butler, G.; Rasmussen, M.D.; Lin, M.F.; Santos, M.A.; Sakthikumar, S.; Munro, C.A.; Rheinbay, E.; Grabherr, M.; Forche, A.; Reedy, J.L.; Agrafioti, I.; Arnaud, M.B.; Bates, S.; Brown, A.J.; Brunke, S.; Costanzo, M.C.; Fitzpatrick, D.A.; de Groot, P.W.; Harris, D.; Hoyer, L.L.; Hube, B.; Klis, F.M.; Kodira, C.; Lennard, N.; Logue, M.E.; Martin, R.; Neiman, A.M.; Nikolaou, E.; Quail, M.A.; Quinn, J…	19465905	Meyerozyma_guilliermondii_ATCC_6260	meyerozyma_guilliermondii_atcc_6260_gca_000149425	negative
Meyerozyma sp. JA9	Ascomycota	Saccharomycetes	Saccharomycetales	Debaryomycetaceae	NCBI/GenBank	GCA_003676015.1	02/07/2019	Trichez, D.; Steindorff, A.S.; Soares, C.E.V.F.; Formighieri, E.F.; Almeida, J.R.M. Physiological and comparative genomic analysis of new isolated yeasts Spathaspora sp. JA1 and Meyerozyma caribbica JA9 reveal insights into xylitol production. 2019, FEMS Yeast Res 19(4):None	31073598	Meyerozyma_sp._JA9	Meyerozyma_sp._JA9	negative
Microbotryum intermedium	Basidiomycota	Microbotryomycetes	Microbotryales	Microbotryaceae	Ensembl/Fungi	GCA_900096595.1	02/07/2019	Branco, S.; Badouin, H.; Rodríguez de la Vega, R.C.; Gouzy, J.; Carpentier, F.; Aguileta, G.; Siguenza, S.; Brandenburg, J.T.; Coelho, M.A.; Hood, M.E.; Giraud, T. Evolutionary strata on young mating-type chromosomes despite the lack of sexual antagonism. 2017, Proc Natl Acad Sci U S A 114(27):7067-7072	28630332	Microbotryum_intermedium	microbotryum_intermedium_gca_900096595	negative
Microbotryum lychnidis-dioicae p1A1 Lamole	Basidiomycota	Microbotryomycetes	Microbotryales	Microbotryaceae	Ensembl/Fungi	GCA_000166175.1	02/07/2019	Perlin, M.H.; Amselem, J.; Fontanillas, E.; Toh, S.S.; Chen, Z.; Goldberg, J.; Duplessis, S.; Henrissat, B.; Young, S.; Zeng, Q.; Aguileta, G.; Petit, E.; Badouin, H.; Andrews, J.; Razeeq, D.; Gabaldón, T.; Quesneville, H.; Giraud, T.; Hood, M.E.; Schultz, D.J.; Cuomo, C.A. Sex and parasites: genomic and transcriptomic analysis of Microbotryum lychnidis-dioicae, the biotrophic and plant-castratin…	26076695	Microbotryum_lychnidis-dioicae_p1A1_Lamole	microbotryum_violaceum	negative
Microdochium bolleyi	Ascomycota	Sordariomycetes	Xylariales	Microdochiaceae	Ensembl/Fungi	GCA_001566295.1	02/07/2019	David, A.S.; Haridas, S.; LaButti, K.; Lim, J.; Lipzen, A.; Wang, M.; Barry, K.; Grigoriev, I.V.; Spatafora, J.W.; May, G. Draft Genome Sequence of Microdochium bolleyi, a Dark Septate Fungal Endophyte of Beach Grass. 2016, Genome Announc 4(2):None	27125481	Microdochium_bolleyi	microdochium_bolleyi_gca_001566295	negative
Microsporum canis CBS 113480	Ascomycota	Eurotiomycetes	Onygenales	Arthrodermataceae	Ensembl/Fungi	GCA_000151145.1	02/07/2019	Martinez, D.A.; Oliver, B.G.; Gräser, Y.; Goldberg, J.M.; Li, W.; Martinez-Rossi, N.M.; Monod, M.; Shelest, E.; Barton, R.C.; Birch, E.; Brakhage, A.A.; Chen, Z.; Gurr, S.J.; Heiman, D.; Heitman, J.; Kosti, I.; Rossi, A.; Saif, S.; Samalova, M.; Saunders, C.W.; Shea, T.; Summerbell, R.C.; Xu, J.; Young, S.; Zeng, Q.; Birren, B.W.; Cuomo, C.A.; White, T.C. Comparative genome analysis of Trichophyt…	22951933	Microsporum_canis_CBS_113480	microsporum_canis_cbs_113480_gca_000151145	negative
Microthyrium microscopicum CBS 115976	Ascomycota	Dothideomycetes	Microthyriales	Microthyriaceae	JGI/Mycocosm	Micmi1	20/04/2021	Haridas, S.; Albert, R.; Binder, M.; Bloem, J.; LaButti, K.; Salamov, A.; Andreopoulos, B.; Baker, S.E.; Barry, K.; Bills, G.; Bluhm, B.H.; Cannon, C.; Castanera, R.; Culley, D.E.; Daum, C.; Ezra, D.; González, J.B.; Henrissat, B.; Kuo, A.; Liang, C.; Lipzen, A.; Lutzoni, F.; Magnuson, J.; Mondo, S.J.; Nolan, M.; Ohm, R.A.; Pangilinan, J.; Park, H.J.; Ramírez, L.; Alfaro, M.; Sun, H.; Tritt, A.; …	32206138	Microthyrium_microscopicum_CBS_115976	microthyrium_microscopicum_cbs_115976	negative
Mixia osmundae IAM 14324	Basidiomycota	Mixiomycetes	Mixiales	Mixiaceae	Ensembl/Fungi	GCA_000241205.2	02/07/2019	Nishida, H.; Kondo, S.; Matsumoto, T.; Suzuki, Y.; Yoshikawa, H.; Taylor, T.D.; Sugiyama, J. Characteristics of nucleosomes and linker DNA regions on the genome of the basidiomycete Mixia osmundae revealed by mono- and dinucleosome mapping. 2012, Open Biol 2(4):120043	22724063	Mixia_osmundae_IAM_14324	mixia_osmundae_iam_14324_gca_000241205	negative
Moelleriella libera RCEF 2490	Ascomycota	Sordariomycetes	Hypocreales	Clavicipitaceae	Ensembl/Fungi	GCA_001636675.1	02/07/2019	Shang, Y.; Xiao, G.; Zheng, P.; Cen, K.; Zhan, S.; Wang, C. Divergent and Convergent Evolution of Fungal Pathogenicity. 2016, Genome Biol Evol 8(5):1374-87	27071652	Moelleriella_libera_RCEF_2490	moelleriella_libera_rcef_2490_gca_001636675	negative
Moesziomyces antarcticus T-34	Basidiomycota	Ustilaginomycetes	Ustilaginales	Ustilaginaceae	Ensembl/Fungi	GCA_000334475.1	02/07/2019	Morita, T.; Koike, H.; Koyama, Y.; Hagiwara, H.; Ito, E.; Fukuoka, T.; Imura, T.; Machida, M.; Kitamoto, D. Genome Sequence of the Basidiomycetous Yeast Pseudozyma antarctica T-34, a Producer of the Glycolipid Biosurfactants Mannosylerythritol Lipids. 2013, Genome Announc 1(2):e0006413	23558529	Moesziomyces_antarcticus_T-34	moesziomyces_antarcticus_t_34_gca_000334475	negative
Moesziomyces aphidis DSM 70725	Basidiomycota	Ustilaginomycetes	Ustilaginales	Ustilaginaceae	Ensembl/Fungi	GCA_000517465.1	02/07/2019	Lorenz, S.; Guenther, M.; Grumaz, C.; Rupp, S.; Zibek, S.; Sohn, K. Genome Sequence of the Basidiomycetous Fungus Pseudozyma aphidis DSM70725, an Efficient Producer of Biosurfactant Mannosylerythritol Lipids. 2014, Genome Announc 2(1):None	24526638	Moesziomyces_aphidis_DSM_70725	moesziomyces_aphidis_dsm_70725_gca_000517465	negative
Monilinia fructigena	Ascomycota	Leotiomycetes	Helotiales	Sclerotiniaceae	NCBI/GenBank	GCA_003260565.1	02/07/2019	Landi, L.; De Miccolis Angelini, R.M.; Pollastro, S.; Abate, D.; Faretra, F.; Romanazzi, G. Genome sequence of the brown rot fungal pathogen Monilinia fructigena. 2018, BMC Res Notes 11(1):758	30352625	Monilinia_fructigena	Monilinia_fructigena	negative
Moniliophthora perniciosa FA553	Basidiomycota	Agaricomycetes	Agaricales	Marasmiaceae	JGI/Mycocosm	Monpe1_1	01/06/2019	Mondego, J.M.; Carazzolle, M.F.; Costa, G.G.; Formighieri, E.F.; Parizzi, L.P.; Rincones, J.; Cotomacci, C.; Carraro, D.M.; Cunha, A.F.; Carrer, H.; Vidal, R.O.; Estrela, R.C.; García, O.; Thomazella, D.P.; de Oliveira, B.V.; Pires, A.B.; Rio, M.C.; Araújo, M.R.; de Moraes, M.H.; Castro, L.A.; Gramacho, K.P.; Gonçalves, M.S.; Neto, J.P.; Neto, A.G.; Barbosa, L.V.; Guiltinan, M.J.; Bailey, B.A.; M…	19019209	Moniliophthora_perniciosa_FA553	moniliophthora_perniciosa_fa553	negative
Moniliophthora roreri MCA 2997	Basidiomycota	Agaricomycetes	Agaricales	Marasmiaceae	Ensembl/Fungi	GCA_000488995.1	02/07/2019	Meinhardt, L.W.; Costa, G.G.; Thomazella, D.P.; Teixeira, P.J.; Carazzolle, M.F.; Schuster, S.C.; Carlson, J.E.; Guiltinan, M.J.; Mieczkowski, P.; Farmer, A.; Ramaraj, T.; Crozier, J.; Davis, R.E.; Shao, J.; Melnick, R.L.; Pereira, G.A.; Bailey, B.A. Genome and secretome analysis of the hemibiotrophic fungal pathogen, Moniliophthora roreri, which causes frosty pod rot disease of cacao: mechanisms…	24571091	Moniliophthora_roreri_MCA_2997	moniliophthora_roreri_mca_2997_gca_000488995	negative
Monosporascus cannonballus	Ascomycota	Sordariomycetes	Xylariales		NCBI/GenBank	GCA_004154925.1	02/07/2019	Robinson, A.J.; Natvig, D.O. Diverse members of the Xylariales lack canonical mating-type regions. 2019, Fungal Genet Biol 122(None):47-52	30557613	Monosporascus_cannonballus	Monosporascus_cannonballus	negative
Monosporascus ibericus	Ascomycota	Sordariomycetes	Xylariales		NCBI/GenBank	GCA_004154915.1	02/07/2019	Robinson, A.J.; Natvig, D.O. Diverse members of the Xylariales lack canonical mating-type regions. 2019, Fungal Genet Biol 122(None):47-52	30557613	Monosporascus_ibericus	Monosporascus_ibericus	negative
Monosporascus sp. 5C6A	Ascomycota	Sordariomycetes	Xylariales		NCBI/GenBank	GCA_004155035.1	02/07/2019	Robinson, A.J.; Natvig, D.O. Diverse members of the Xylariales lack canonical mating-type regions. 2019, Fungal Genet Biol 122(None):47-52	30557613	Monosporascus_sp._5C6A	Monosporascus_sp._5C6A	negative
Monosporascus sp. CRB-8-3	Ascomycota	Sordariomycetes	Xylariales		NCBI/GenBank	GCA_004155055.1	02/07/2019	Robinson, A.J.; Natvig, D.O. Diverse members of the Xylariales lack canonical mating-type regions. 2019, Fungal Genet Biol 122(None):47-52	30557613	Monosporascus_sp._CRB-8-3	Monosporascus_sp._CRB-8-3	negative
Monosporascus sp. CRB-9-2	Ascomycota	Sordariomycetes	Xylariales		NCBI/GenBank	GCA_004155915.1	02/07/2019	Robinson, A.J.; Natvig, D.O. Diverse members of the Xylariales lack canonical mating-type regions. 2019, Fungal Genet Biol 122(None):47-52	30557613	Monosporascus_sp._CRB-9-2	Monosporascus_sp._CRB-9-2	negative
Monosporascus sp. GIB2	Ascomycota	Sordariomycetes	Xylariales		NCBI/GenBank	GCA_004155935.1	02/07/2019	Robinson, A.J.; Natvig, D.O. Diverse members of the Xylariales lack canonical mating-type regions. 2019, Fungal Genet Biol 122(None):47-52	30557613	Monosporascus_sp._GIB2	Monosporascus_sp._GIB2	negative
Monosporascus sp. MC13-8B	Ascomycota	Sordariomycetes	Xylariales		NCBI/GenBank	GCA_004154975.1	02/07/2019	Robinson, A.J.; Natvig, D.O. Diverse members of the Xylariales lack canonical mating-type regions. 2019, Fungal Genet Biol 122(None):47-52	30557613	Monosporascus_sp._MC13-8B	Monosporascus_sp._MC13-8B	negative
Monosporascus sp. MG133	Ascomycota	Sordariomycetes	Xylariales		NCBI/GenBank	GCA_004155925.1	02/07/2019	Robinson, A.J.; Natvig, D.O. Diverse members of the Xylariales lack canonical mating-type regions. 2019, Fungal Genet Biol 122(None):47-52	30557613	Monosporascus_sp._MG133	Monosporascus_sp._MG133	negative
Monosporascus sp. mg162	Ascomycota	Sordariomycetes	Xylariales		NCBI/GenBank	GCA_004155945.1	02/07/2019	Robinson, A.J.; Natvig, D.O. Diverse members of the Xylariales lack canonical mating-type regions. 2019, Fungal Genet Biol 122(None):47-52	30557613	Monosporascus_sp._mg162	Monosporascus_sp._mg162	negative
Morchella conica CCBAS932	Ascomycota	Pezizomycetes	Pezizales	Morchellaceae	NCBI/GenBank	GCA_003790465.1	02/07/2019	Murat, C.; Payen, T.; Noel, B.; Kuo, A.; Morin, E.; Chen, J.; Kohler, A.; Krizsán, K.; Balestrini, R.; Da Silva, C.; Montanini, B.; Hainaut, M.; Levati, E.; Barry, K.W.; Belfiori, B.; Cichocki, N.; Clum, A.; Dockter, R.B.; Fauchery, L.; Guy, J.; Iotti, M.; Le Tacon, F.; Lindquist, E.A.; Lipzen, A.; Malagnac, F.; Mello, A.; Molinier, V.; Miyauchi, S.; Poulain, J.; Riccioni, C.; Rubini, A.; Sitrit,…	30420746	Morchella_conica_CCBAS932	Morchella_conica	negative
Morchella importuna	Ascomycota	Pezizomycetes	Pezizales	Morchellaceae	JGI/Mycocosm	Morco1	01/06/2019	Murat, C.; Payen, T.; Noel, B.; Kuo, A.; Morin, E.; Chen, J.; Kohler, A.; Krizsán, K.; Balestrini, R.; Da Silva, C.; Montanini, B.; Hainaut, M.; Levati, E.; Barry, K.W.; Belfiori, B.; Cichocki, N.; Clum, A.; Dockter, R.B.; Fauchery, L.; Guy, J.; Iotti, M.; Le Tacon, F.; Lindquist, E.A.; Lipzen, A.; Malagnac, F.; Mello, A.; Molinier, V.; Miyauchi, S.; Poulain, J.; Riccioni, C.; Rubini, A.; Sitrit,…	30420746	Morchella_importuna	morchella_importuna_ccbas932	negative
Morchella importuna	Ascomycota	Pezizomycetes	Pezizales	Morchellaceae	JGI/Mycocosm	Morimp1	08/10/2019	Tan, H.; Kohler, A.; Miao, R.; Liu, T.; Zhang, Q.; Zhang, B.; Jiang, L.; Wang, Y.; Xie, L.; Tang, J.; Li, X.; Liu, L.; Grigoriev, I.V.; Daum, C.; LaButti, K.; Lipzen, A.; Kuo, A.; Morin, E.; Drula, E.; Henrissat, B.; Wang, B.; Huang, Z.; Gan, B.; Peng, W.; Martin, F.M. Multi-omic analyses of exogenous nutrient bag decomposition by the black morel Morchella importuna reveal sustained carbon acquis…	31314937	Morchella_importuna	morchella_importuna_scydj1-a1	negative
Mortierella elongata AG-77	Mucoromycota	Mortierellomycetes	Mortierellales	Mortierellaceae	Ensembl/Fungi	GCA_001651415.1	02/07/2019	Uehling, J.; Gryganskyi, A.; Hameed, K.; Tschaplinski, T.; Misztal, P.K.; Wu, S.; Desirò, A.; Vande Pol, N.; Du, Z.; Zienkiewicz, A.; Zienkiewicz, K.; Morin, E.; Tisserant, E.; Splivallo, R.; Hainaut, M.; Henrissat, B.; Ohm, R.; Kuo, A.; Yan, J.; Lipzen, A.; Nolan, M.; LaButti, K.; Barry, K.; Goldstein, A.H.; Labbé, J.; Schadt, C.; Tuskan, G.; Grigoriev, I.; Martin, F.; Vilgalys, R.; Bonito, G. C…	28076891	Mortierella_elongata_AG-77	mortierella_elongata_ag_77_gca_001651415	negative
Mucidula mucida	Basidiomycota	Agaricomycetes	Agaricales	Physalacriaceae	JGI/Mycocosm	Oudmuc1	20/04/2021	Ruiz-Dueñas, F.J.; Barrasa, J.M.; Sánchez-García, M.; Camarero, S.; Miyauchi, S.; Serrano, A.; Linde, D.; Babiker, R.; Drula, E.; Ayuso-Fernández, I.; Pacheco, R.; Padilla, G.; Ferreira, P.; Barriuso, J.; Kellner, H.; Castanera, R.; Alfaro, M.; Ramírez, L.; Pisabarro, A.G.; Riley, R.; Kuo, A.; Andreopoulos, W.; LaButti, K.; Pangilinan, J.; Tritt, A.; Lipzen, A.; He, G.; Yan, M.; Ng, V.; Grigoriev…	33211093	Mucidula_mucida	oudemansiella_mucida_cbs_558.79	negative
Mucor ambiguus	Mucoromycota	Mucoromycetes	Mucorales	Mucoraceae	JGI/Mycocosm	Mucam1	20/04/2021	Lebreton, A.; Corre, E.; Jany, J.L.; Brillet-Guéguen, L.; Pèrez-Arques, C.; Garre, V.; Monsoor, M.; Debuchy, R.; Le Meur, C.; Coton, E.; Barbier, G.; Meslet-Cladière, L. Comparative genomics applied to Mucor species with different lifestyles. 2020, BMC Genomics 21(1):135	32039703	Mucor_ambiguus	mucor_ambiguus_nbrc_6742	negative
Mucor circinelloides	Mucoromycota		Mucorales	Mucoraceae	JGI/Mycocosm	None	01/06/2019	Corrochano, L.M.; Kuo, A.; Marcet-Houben, M.; Polaino, S.; Salamov, A.; Villalobos-Escobedo, J.M.; Grimwood, J.; Álvarez, M.I.; Avalos, J.; Bauer, D.; Benito, E.P.; Benoit, I.; Burger, G.; Camino, L.P.; Cánovas, D.; Cerdá-Olmedo, E.; Cheng, J.F.; Domínguez, A.; Eliáš, M.; Eslava, A.P.; Glaser, F.; Gutiérrez, G.; Heitman, J.; Henrissat, B.; Iturriaga, E.A.; Lang, B.F.; Lavín, J.L.; Lee, S.C.; Li, …	27238284	Mucor_circinelloides	mucor_circinelloides_cbs277.49	negative
Mucor endophyticus	Mucoromycota	Mucoromycetes	Mucorales	Mucoraceae	JGI/Mycocosm	Mucend1	20/04/2021	Lebreton, A.; Corre, E.; Jany, J.L.; Brillet-Guéguen, L.; Pèrez-Arques, C.; Garre, V.; Monsoor, M.; Debuchy, R.; Le Meur, C.; Coton, E.; Barbier, G.; Meslet-Cladière, L. Comparative genomics applied to Mucor species with different lifestyles. 2020, BMC Genomics 21(1):135	32039703	Mucor_endophyticus	mucor_endophyticus	negative
Mucor fuscus	Mucoromycota	Mucoromycetes	Mucorales	Mucoraceae	JGI/Mycocosm	Mucfus1	20/04/2021	Lebreton, A.; Corre, E.; Jany, J.L.; Brillet-Guéguen, L.; Pèrez-Arques, C.; Garre, V.; Monsoor, M.; Debuchy, R.; Le Meur, C.; Coton, E.; Barbier, G.; Meslet-Cladière, L. Comparative genomics applied to Mucor species with different lifestyles. 2020, BMC Genomics 21(1):135	32039703	Mucor_fuscus	mucor_fuscus	negative
Mucor lanceolatus	Mucoromycota	Mucoromycetes	Mucorales	Mucoraceae	JGI/Mycocosm	Muclan1	20/04/2021	Lebreton, A.; Corre, E.; Jany, J.L.; Brillet-Guéguen, L.; Pèrez-Arques, C.; Garre, V.; Monsoor, M.; Debuchy, R.; Le Meur, C.; Coton, E.; Barbier, G.; Meslet-Cladière, L. Comparative genomics applied to Mucor species with different lifestyles. 2020, BMC Genomics 21(1):135	32039703	Mucor_lanceolatus	mucor_lanceolatus	negative
Mucor lusitanicus	Mucoromycota	Mucoromycetes	Mucorales	Mucoraceae	JGI/Mycocosm	Mucci3	20/04/2021	Corrochano, L.M.; Kuo, A.; Marcet-Houben, M.; Polaino, S.; Salamov, A.; Villalobos-Escobedo, J.M.; Grimwood, J.; Álvarez, M.I.; Avalos, J.; Bauer, D.; Benito, E.P.; Benoit, I.; Burger, G.; Camino, L.P.; Cánovas, D.; Cerdá-Olmedo, E.; Cheng, J.F.; Domínguez, A.; Eliáš, M.; Eslava, A.P.; Glaser, F.; Gutiérrez, G.; Heitman, J.; Henrissat, B.; Iturriaga, E.A.; Lang, B.F.; Lavín, J.L.; Lee, S.C.; Li, …	27238284	Mucor_lusitanicus	mucor_lusitanicus_cbs277.49	negative
Mucor lusitanicus	Mucoromycota	Mucoromycetes	Mucorales	Mucoraceae	JGI/Mycocosm	Muccir1_3	20/04/2021	Navarro-Mendoza, M.I.; Pérez-Arques, C.; Panchal, S.; Nicolás, F.E.; Mondo, S.J.; Ganguly, P.; Pangilinan, J.; Grigoriev, I.V.; Heitman, J.; Sanyal, K.; Garre, V. Early Diverging Fungus Mucor circinelloides Lacks Centromeric Histone CENP-A and Displays a Mosaic of Point and Regional Centromeres. 2019, Curr Biol 29(22):3791-3802.e6	31679929	Mucor_lusitanicus	mucor_lusitanicus_circinelloides_mu402	negative
Mucor racemosus	Mucoromycota	Mucoromycetes	Mucorales	Mucoraceae	JGI/Mycocosm	Mucrac1	20/04/2021	Lebreton, A.; Corre, E.; Jany, J.L.; Brillet-Guéguen, L.; Pèrez-Arques, C.; Garre, V.; Monsoor, M.; Debuchy, R.; Le Meur, C.; Coton, E.; Barbier, G.; Meslet-Cladière, L. Comparative genomics applied to Mucor species with different lifestyles. 2020, BMC Genomics 21(1):135	32039703	Mucor_racemosus	mucor_racemosus	negative
Mycena galopus ATCC 62051	Basidiomycota	Agaricomycetes	Agaricales	Mycenaceae	JGI/Mycocosm	Mycgal1	20/04/2021	Miyauchi, S.; Kiss, E.; Kuo, A.; Drula, E.; Kohler, A.; Sánchez-García, M.; Morin, E.; Andreopoulos, B.; Barry, K.W.; Bonito, G.; Buée, M.; Carver, A.; Chen, C.; Cichocki, N.; Clum, A.; Culley, D.; Crous, P.W.; Fauchery, L.; Girlanda, M.; Hayes, R.D.; Kéri, Z.; LaButti, K.; Lipzen, A.; Lombard, V.; Magnuson, J.; Maillard, F.; Murat, C.; Nolan, M.; Ohm, R.A.; Pangilinan, J.; Pereira, M.F.; Perotto…	33046698	Mycena_galopus_ATCC_62051	mycena_galopus_atcc-62051	negative
Myriangium duriaei CBS 260.36	Ascomycota	Dothideomycetes	Myriangiales	Myriangiaceae	JGI/Mycocosm	Myrdu1	20/04/2021	Haridas, S.; Albert, R.; Binder, M.; Bloem, J.; LaButti, K.; Salamov, A.; Andreopoulos, B.; Baker, S.E.; Barry, K.; Bills, G.; Bluhm, B.H.; Cannon, C.; Castanera, R.; Culley, D.E.; Daum, C.; Ezra, D.; González, J.B.; Henrissat, B.; Kuo, A.; Liang, C.; Lipzen, A.; Lutzoni, F.; Magnuson, J.; Mondo, S.J.; Nolan, M.; Ohm, R.A.; Pangilinan, J.; Park, H.J.; Ramírez, L.; Alfaro, M.; Sun, H.; Tritt, A.; …	32206138	Myriangium_duriaei_CBS_260.36	myriangium_duriaei_cbs_260.36	negative
Mytilinidion resinicola	Ascomycota	Dothideomycetes	Mytilinidiales	Mytilinidiaceae	JGI/Mycocosm	Mytre1	20/04/2021	Haridas, S.; Albert, R.; Binder, M.; Bloem, J.; LaButti, K.; Salamov, A.; Andreopoulos, B.; Baker, S.E.; Barry, K.; Bills, G.; Bluhm, B.H.; Cannon, C.; Castanera, R.; Culley, D.E.; Daum, C.; Ezra, D.; González, J.B.; Henrissat, B.; Kuo, A.; Liang, C.; Lipzen, A.; Lutzoni, F.; Magnuson, J.; Mondo, S.J.; Nolan, M.; Ohm, R.A.; Pangilinan, J.; Park, H.J.; Ramírez, L.; Alfaro, M.; Sun, H.; Tritt, A.; …	32206138	Mytilinidion_resinicola	mytilinidion_resinicola_cbs_304.34	negative
Nadsonia fulvescens var. elongata DSM 6958	Ascomycota	Saccharomycetes	Saccharomycetales		Ensembl/Fungi	GCA_001661315.1	02/07/2019	Riley, R.; Haridas, S.; Wolfe, K.H.; Lopes, M.R.; Hittinger, C.T.; Göker, M.; Salamov, A.A.; Wisecaver, J.H.; Long, T.M.; Calvey, C.H.; Aerts, A.L.; Barry, K.W.; Choi, C.; Clum, A.; Coughlan, A.Y.; Deshpande, S.; Douglass, A.P.; Hanson, S.J.; Klenk, H.P.; LaButti, K.M.; Lapidus, A.; Lindquist, E.A.; Lipzen, A.M.; Meier-Kolthoff, J.P.; Ohm, R.A.; Otillar, R.P.; Pangilinan, J.L.; Peng, Y.; Rokas, A…	27535936	Nadsonia_fulvescens_var._elongata_DSM_6958	nadsonia_fulvescens_var_elongata_dsm_6958_gca_001661315	negative
Naematelia encephala	Basidiomycota	Tremellomycetes	Tremellales	Naemateliaceae	Ensembl/Fungi	GCA_002105065.1	02/07/2019	Mondo, S.J.; Dannebaum, R.O.; Kuo, R.C.; Louie, K.B.; Bewick, A.J.; LaButti, K.; Haridas, S.; Kuo, A.; Salamov, A.; Ahrendt, S.R.; Lau, R.; Bowen, B.P.; Lipzen, A.; Sullivan, W.; Andreopoulos, B.B.; Clum, A.; Lindquist, E.; Daum, C.; Northen, T.R.; Kunde-Ramamoorthy, G.; Schmitz, R.J.; Gryganskyi, A.; Culley, D.; Magnuson, J.; James, T.Y.; O'Malley, M.A.; Stajich, J.E.; Spatafora, J.W.; Visel, A.…	28481340	Naematelia_encephala	naematelia_encephala_gca_002105065	negative
Naganishia vishniacii ANT03-052	Basidiomycota	Tremellomycetes	Filobasidiales	Filobasidiaceae	JGI/Mycocosm	Nagvi1	20/04/2021	Nizovoy, P.; Bellora, N.; Haridas, S.; Sun, H.; Daum, C.; Barry, K.; Grigoriev, I.V.; Libkind, D.; Connell, L.B.; Moliné, M. Unique genomic traits for cold adaptation in Naganishia vishniacii, a polyextremophile yeast isolated from Antarctica. 2021, FEMS Yeast Res 21(1):None	33232451	Naganishia_vishniacii_ANT03-052	naganishia_vishniacii_ant03-052	negative
Nakaseomyces bacillisporus CBS 7720	Ascomycota	Saccharomycetes	Saccharomycetales	Saccharomycetaceae	JGI/Mycocosm	Nakbac1	01/06/2019	Gabaldón, T.; Martin, T.; Marcet-Houben, M.; Durrens, P.; Bolotin-Fukuhara, M.; Lespinet, O.; Arnaise, S.; Boisnard, S.; Aguileta, G.; Atanasova, R.; Bouchier, C.; Couloux, A.; Creno, S.; Almeida Cruz, J.; Devillers, H.; Enache-Angoulvant, A.; Guitard, J.; Jaouen, L.; Ma, L.; Marck, C.; Neuvéglise, C.; Pelletier, E.; Pinard, A.; Poulain, J.; Recoquillay, J.; Westhof, E.; Wincker, P.; Dujon, B.; H…	24034898	Nakaseomyces_bacillisporus_CBS_7720	nakaseomyces_bacillisporus_cbs_7720	negative
Nakaseomyces delphensis CBS 2170	Ascomycota	Saccharomycetes	Saccharomycetales	Saccharomycetaceae	JGI/Mycocosm	Nakdel1	01/06/2019	Gabaldón, T.; Martin, T.; Marcet-Houben, M.; Durrens, P.; Bolotin-Fukuhara, M.; Lespinet, O.; Arnaise, S.; Boisnard, S.; Aguileta, G.; Atanasova, R.; Bouchier, C.; Couloux, A.; Creno, S.; Almeida Cruz, J.; Devillers, H.; Enache-Angoulvant, A.; Guitard, J.; Jaouen, L.; Ma, L.; Marck, C.; Neuvéglise, C.; Pelletier, E.; Pinard, A.; Poulain, J.; Recoquillay, J.; Westhof, E.; Wincker, P.; Dujon, B.; H…	24034898	Nakaseomyces_delphensis_CBS_2170	nakaseomyces_delphensis_cbs_2170	negative
Nakazawaea wickerhamii	Ascomycota	Saccharomycetes	Saccharomycetales	Pichiaceae	JGI/Mycocosm	Nakwi1	01/06/2019	Krassowski, T.; Coughlan, A.Y.; Shen, X.X.; Zhou, X.; Kominek, J.; Opulente, D.A.; Riley, R.; Grigoriev, I.V.; Maheshwari, N.; Shields, D.C.; Kurtzman, C.P.; Hittinger, C.T.; Rokas, A.; Wolfe, K.H. Evolutionary instability of CUG-Leu in the genetic code of budding yeasts. 2018, Nat Commun 9(1):1887	29760453	Nakazawaea_wickerhamii	nakazawaea_wickerhamii_nrrl_y-2563	negative
Nannizzia gypsea CBS 118893	Ascomycota	Eurotiomycetes	Onygenales	Arthrodermataceae	Ensembl/Fungi	GCA_000150975.2	02/07/2019	Martinez, D.A.; Oliver, B.G.; Gräser, Y.; Goldberg, J.M.; Li, W.; Martinez-Rossi, N.M.; Monod, M.; Shelest, E.; Barton, R.C.; Birch, E.; Brakhage, A.A.; Chen, Z.; Gurr, S.J.; Heiman, D.; Heitman, J.; Kosti, I.; Rossi, A.; Saif, S.; Samalova, M.; Saunders, C.W.; Shea, T.; Summerbell, R.C.; Xu, J.; Young, S.; Zeng, Q.; Birren, B.W.; Cuomo, C.A.; White, T.C. Comparative genome analysis of Trichophyt…	22951933	Nannizzia_gypsea_CBS_118893	nannizzia_gypsea_cbs_118893_gca_000150975	negative
Naumovozyma castellii CBS 4309	Ascomycota	Saccharomycetes	Saccharomycetales	Saccharomycetaceae	Ensembl/Fungi	GCA_000237345.1	02/07/2019	Gordon, J.L.; Armisén, D.; Proux-Wéra, E.; ÓhÉigeartaigh, S.S.; Byrne, K.P.; Wolfe, K.H. Evolutionary erosion of yeast sex chromosomes by mating-type switching accidents. 2011, Proc Natl Acad Sci U S A 108(50):20024-9	22123960	Naumovozyma_castellii_CBS_4309	naumovozyma_castellii_cbs_4309_gca_000237345	negative
Naumovozyma dairenensis CBS 421	Ascomycota	Saccharomycetes	Saccharomycetales	Saccharomycetaceae	Ensembl/Fungi	GCA_000227115.2	02/07/2019	Gordon, J.L.; Armisén, D.; Proux-Wéra, E.; ÓhÉigeartaigh, S.S.; Byrne, K.P.; Wolfe, K.H. Evolutionary erosion of yeast sex chromosomes by mating-type switching accidents. 2011, Proc Natl Acad Sci U S A 108(50):20024-9	22123960	Naumovozyma_dairenensis_CBS_421	naumovozyma_dairenensis_cbs_421_gca_000227115	negative
Neocallimastix californiae	Chytridiomycota	Neocallimastigomycetes	Neocallimastigales	Neocallimastigaceae	Ensembl/Fungi	GCA_002104975.1	02/07/2019	Haitjema, C.H.; Gilmore, S.P.; Henske, J.K.; Solomon, K.V.; de Groot, R.; Kuo, A.; Mondo, S.J.; Salamov, A.A.; LaButti, K.; Zhao, Z.; Chiniquy, J.; Barry, K.; Brewer, H.M.; Purvine, S.O.; Wright, A.T.; Hainaut, M.; Boxma, B.; van Alen, T.; Hackstein, J.H.P.; Henrissat, B.; Baker, S.E.; Grigoriev, I.V.; O'Malley, M.A. A parts list for fungal cellulosomes revealed by comparative genomics. 2017, Nat…	28555641	Neocallimastix_californiae	neocallimastix_californiae_gca_002104975	negative
Neocallimastix sp. JGI-2020a	Chytridiomycota	Neocallimastigomycetes	Neocallimastigales	Neocallimastigaceae	JGI/Mycocosm	Neolan1	20/04/2021	Wilken, S.E.; Monk, J.M.; Leggieri, P.A.; Lawson, C.E.; Lankiewicz, T.S.; Seppälä, S.; Daum, C.G.; Jenkins, J.; Lipzen, A.M.; Mondo, S.J.; Barry, K.W.; Grigoriev, I.V.; Henske, J.K.; Theodorou, M.K.; Palsson, B.O.; Petzold, L.R.; O'Malley, M.A. Experimentally Validated Reconstruction and Analysis of a Genome-Scale Metabolic Model of an Anaerobic Neocallimastigomycota Fungus. 2021, mSystems 6(1):N…	33594000	Neocallimastix_sp._JGI-2020a	neocallimastix_lanati	negative
Neofusicoccum parvum UCRNP2	Ascomycota	Dothideomycetes	Botryosphaeriales	Botryosphaeriaceae	Ensembl/Fungi	GCA_000385595.1	02/07/2019	Blanco-Ulate, B.; Rolshausen, P.; Cantu, D. Draft Genome Sequence of Neofusicoccum parvum Isolate UCR-NP2, a Fungal Vascular Pathogen Associated with Grapevine Cankers. 2013, Genome Announc 1(3):None	23766404	Neofusicoccum_parvum_UCRNP2	neofusicoccum_parvum_ucrnp2_gca_000385595	negative
Neohortaea acidophila	Ascomycota	Dothideomycetes	Mycosphaerellales	Teratosphaeriaceae	JGI/Mycocosm	Horac1	20/04/2021	Haridas, S.; Albert, R.; Binder, M.; Bloem, J.; LaButti, K.; Salamov, A.; Andreopoulos, B.; Baker, S.E.; Barry, K.; Bills, G.; Bluhm, B.H.; Cannon, C.; Castanera, R.; Culley, D.E.; Daum, C.; Ezra, D.; González, J.B.; Henrissat, B.; Kuo, A.; Liang, C.; Lipzen, A.; Lutzoni, F.; Magnuson, J.; Mondo, S.J.; Nolan, M.; Ohm, R.A.; Pangilinan, J.; Park, H.J.; Ramírez, L.; Alfaro, M.; Sun, H.; Tritt, A.; …	32206138	Neohortaea_acidophila	hortaea_acidophila_cbs_113389	negative
Neolecta irregularis DAH-3	Ascomycota	Neolectomycetes	Neolectales	Neolectaceae	Ensembl/Fungi	GCA_001929475.1	02/07/2019	Nguyen, T.A.; Cissé, O.H.; Yun Wong, J.; Zheng, P.; Hewitt, D.; Nowrousian, M.; Stajich, J.E.; Jedd, G. Innovation and constraint leading to complex multicellularity in the Ascomycota. 2017, Nat Commun 8(None):14444	28176784	Neolecta_irregularis_DAH-3	neolecta_irregularis_dah_3_gca_001929475	negative
Neolentinus lepideus HHB14362 ss-1	Basidiomycota	Agaricomycetes	Gloeophyllales	Gloeophyllaceae	Ensembl/Fungi	GCA_001632425.1	02/07/2019	Nagy, L.G.; Riley, R.; Tritt, A.; Adam, C.; Daum, C.; Floudas, D.; Sun, H.; Yadav, J.S.; Pangilinan, J.; Larsson, K.H.; Matsuura, K.; Barry, K.; Labutti, K.; Kuo, R.; Ohm, R.A.; Bhattacharya, S.S.; Shirouzu, T.; Yoshinaga, Y.; Martin, F.M.; Grigoriev, I.V.; Hibbett, D.S. Comparative Genomics of Early-Diverging Mushroom-Forming Fungi Provides Insights into the Origins of Lignocellulose Decay Capab…	26659563	Neolentinus_lepideus_HHB14362_ss-1	neolentinus_lepideus_hhb14362_ss_1_gca_001632425	negative
Neonectria ditissima	Ascomycota	Sordariomycetes	Hypocreales	Nectriaceae	Ensembl/Fungi	GCA_001306435.1	02/07/2019	Gómez-Cortecero, A.; Harrison, R.J.; Armitage, A.D. Draft Genome Sequence of a European Isolate of the Apple Canker Pathogen Neonectria ditissima. 2015, Genome Announc 3(6):None	26586869	Neonectria_ditissima	neonectria_ditissima_gca_001306435	negative
Neurospora crassa OR74A	Ascomycota	Sordariomycetes	Sordariales	Sordariaceae	Ensembl/Fungi	GCA_000182925.2	02/07/2019	Galagan, J.E.; Calvo, S.E.; Borkovich, K.A.; Selker, E.U.; Read, N.D.; Jaffe, D.; FitzHugh, W.; Ma, L.J.; Smirnov, S.; Purcell, S.; Rehman, B.; Elkins, T.; Engels, R.; Wang, S.; Nielsen, C.B.; Butler, J.; Endrizzi, M.; Qui, D.; Ianakiev, P.; Bell-Pedersen, D.; Nelson, M.A.; Werner-Washburne, M.; Selitrennikoff, C.P.; Kinsey, J.A.; Braun, E.L.; Zelter, A.; Schulte, U.; Kothe, G.O.; Jedd, G.; Mewes…	12712197	Neurospora_crassa_OR74A	neurospora_crassa	negative
Neurospora tetrasperma FGSC 2509	Ascomycota	Sordariomycetes	Sordariales	Sordariaceae	Ensembl/Fungi	GCA_000213195.1	02/07/2019	Ellison, C.E.; Stajich, J.E.; Jacobson, D.J.; Natvig, D.O.; Lapidus, A.; Foster, B.; Aerts, A.; Riley, R.; Lindquist, E.A.; Grigoriev, I.V.; Taylor, J.W. Massive changes in genome architecture accompany the transition to self-fertility in the filamentous fungus Neurospora tetrasperma. 2011, Genetics 189(1):55-69	21750257	Neurospora_tetrasperma_FGSC_2509	neurospora_tetrasperma_fgsc_2509_gca_000213195	negative
Obba rivulosa	Basidiomycota	Agaricomycetes	Polyporales	Gelatoporiaceae	NCBI/GenBank	GCA_001687445.1	01/06/2019	Miettinen, O.; Riley, R.; Barry, K.; Cullen, D.; de Vries, R.P.; Hainaut, M.; Hatakka, A.; Henrissat, B.; Hildén, K.; Kuo, R.; LaButti, K.; Lipzen, A.; Mäkelä, M.R.; Sandor, L.; Spatafora, J.W.; Grigoriev, I.V.; Hibbett, D.S. Draft Genome Sequence of the White-Rot Fungus Obba rivulosa 3A-2. 2016, Genome Announc 4(5):None	27634999	Obba_rivulosa	Obba_rivulosa	negative
Oehlia diaphana	Mucoromycota	Glomeromycetes	Glomerales	Glomeraceae	JGI/Mycocosm	Rhidi1	01/06/2019	Morin, E.; Miyauchi, S.; San Clemente, H.; Chen, E.C.H.; Pelin, A.; de la Providencia, I.; Ndikumana, S.; Beaudet, D.; Hainaut, M.; Drula, E.; Kuo, A.; Tang, N.; Roy, S.; Viala, J.; Henrissat, B.; Grigoriev, I.V.; Corradi, N.; Roux, C.; Martin, F.M. Comparative genomics of Rhizophagus irregularis, R. cerebriforme, R. diaphanus and Gigaspora rosea highlights specific genetic features in Glomeromyc…	30636349	Oehlia_diaphana	rhizophagus_diaphanus	negative
Ogataea parapolymorpha DL-1	Ascomycota	Saccharomycetes	Saccharomycetales	Pichiaceae	Ensembl/Fungi	GCA_000187245.3	02/07/2019	Ravin, N.V.; Eldarov, M.A.; Kadnikov, V.V.; Beletsky, A.V.; Schneider, J.; Mardanova, E.S.; Smekalova, E.M.; Zvereva, M.I.; Dontsova, O.A.; Mardanov, A.V.; Skryabin, K.G. Genome sequence and analysis of methylotrophic yeast Hansenula polymorpha DL1. 2013, BMC Genomics 14(None):837	24279325	Ogataea_parapolymorpha_DL-1	ogataea_parapolymorpha_dl_1_gca_000187245	negative
Ogataea polymorpha	Ascomycota	Saccharomycetes	Saccharomycetales	Pichiaceae	Ensembl/Fungi	GCA_001664045.1	02/07/2019	Riley, R.; Haridas, S.; Wolfe, K.H.; Lopes, M.R.; Hittinger, C.T.; Göker, M.; Salamov, A.A.; Wisecaver, J.H.; Long, T.M.; Calvey, C.H.; Aerts, A.L.; Barry, K.W.; Choi, C.; Clum, A.; Coughlan, A.Y.; Deshpande, S.; Douglass, A.P.; Hanson, S.J.; Klenk, H.P.; LaButti, K.M.; Lapidus, A.; Lindquist, E.A.; Lipzen, A.M.; Meier-Kolthoff, J.P.; Ohm, R.A.; Otillar, R.P.; Pangilinan, J.L.; Peng, Y.; Rokas, A…	27535936	Ogataea_polymorpha	ogataea_polymorpha_gca_001664045	negative
Oidiodendron maius Zn	Ascomycota	Leotiomycetes		Myxotrichaceae	Ensembl/Fungi	GCA_000827325.1	02/07/2019	Kohler, A.; Kuo, A.; Nagy, L.G.; Morin, E.; Barry, K.W.; Buscot, F.; Canbäck, B.; Choi, C.; Cichocki, N.; Clum, A.; Colpaert, J.; Copeland, A.; Costa, M.D.; Doré, J.; Floudas, D.; Gay, G.; Girlanda, M.; Henrissat, B.; Herrmann, S.; Hess, J.; Högberg, N.; Johansson, T.; Khouja, H.R.; LaButti, K.; Lahrmann, U.; Levasseur, A.; Lindquist, E.A.; Lipzen, A.; Marmeisse, R.; Martino, E.; Murat, C.; Ngan,…	25706625	Oidiodendron_maius_Zn	oidiodendron_maius_zn_gca_000827325	positive
Oidium neolycopersici	Ascomycota	Leotiomycetes	Erysiphales	Erysiphaceae	NCBI/GenBank	GCA_003610855.1	02/07/2019	Wu, Y.; Ma, X.; Pan, Z.; Kale, S.D.; Song, Y.; King, H.; Zhang, Q.; Presley, C.; Deng, X.; Wei, C.I.; Xiao, S. Comparative genome analyses reveal sequence features reflecting distinct modes of host-adaptation between dicot and monocot powdery mildew. 2018, BMC Genomics 19(1):705	30253736	Oidium_neolycopersici	Oidium_neolycopersici	negative
Olpidium bornovanus UBC F19785	Olpidiomycota	Olpidiomycetes	Olpidiales	Olpidiaceae	JGI/Mycocosm	Olpbor1	20/04/2021	Chang, Y.; Rochon, D.; Sekimoto, S.; Wang, Y.; Chovatia, M.; Sandor, L.; Salamov, A.; Grigoriev, I.V.; Stajich, J.E.; Spatafora, J.W. Genome-scale phylogenetic analyses confirm Olpidium as the closest living zoosporic fungus to the non-flagellated, terrestrial fungi. 2021, Sci Rep 11(1):3217	33547391	Olpidium_bornovanus_UBC_F19785	olpidium_bornovanus_ubc_f19785	negative
Omphalotus olearius	Basidiomycota	Agaricomycetes	Agaricales	Omphalotaceae	JGI/Mycocosm	Ompol1	01/06/2019	Wawrzyn, G.T.; Quin, M.B.; Choudhary, S.; López-Gallego, F.; Schmidt-Dannert, C. Draft genome of Omphalotus olearius provides a predictive framework for sesquiterpenoid natural product biosynthesis in Basidiomycota. 2012, Chem Biol 19(6):772-83	22726691	Omphalotus_olearius	omphalotus_olearius	negative
Ophiobolus disseminans	Ascomycota	Dothideomycetes	Pleosporales	Leptosphaeriaceae	JGI/Mycocosm	Ophdi1	20/04/2021	Haridas, S.; Albert, R.; Binder, M.; Bloem, J.; LaButti, K.; Salamov, A.; Andreopoulos, B.; Baker, S.E.; Barry, K.; Bills, G.; Bluhm, B.H.; Cannon, C.; Castanera, R.; Culley, D.E.; Daum, C.; Ezra, D.; González, J.B.; Henrissat, B.; Kuo, A.; Liang, C.; Lipzen, A.; Lutzoni, F.; Magnuson, J.; Mondo, S.J.; Nolan, M.; Ohm, R.A.; Pangilinan, J.; Park, H.J.; Ramírez, L.; Alfaro, M.; Sun, H.; Tritt, A.; …	32206138	Ophiobolus_disseminans	ophiobolus_disseminans_cbs_113818	negative
Ophiocordyceps australis	Ascomycota	Sordariomycetes	Hypocreales	Ophiocordycipitaceae	Ensembl/Fungi	GCA_002591415.1	02/07/2019	de Bekker, C.; Ohm, R.A.; Evans, H.C.; Brachmann, A.; Hughes, D.P. Ant-infecting Ophiocordyceps genomes reveal a high diversity of potential behavioral manipulation genes and a possible major role for enterotoxins. 2017, Sci Rep 7(1):12508	28970504	Ophiocordyceps_australis	ophiocordyceps_australis_gca_002591415	negative
Ophiocordyceps camponoti-floridani	Ascomycota	Sordariomycetes	Hypocreales	Ophiocordycipitaceae	NCBI/GenBank	GCA_012980515.1	17/05/2021	Will, I.; Das, B.; Trinh, T.; Brachmann, A.; Ohm, R.A.; de Bekker, C. Genetic Underpinnings of Host Manipulation by <i>Ophiocordyceps</i> as Revealed by Comparative Transcriptomics. 2020, G3 (Bethesda) 10(7):2275-2296	32354705	Ophiocordyceps_camponoti-floridani	Ophiocordyceps_camponoti-floridani	negative
Ophiocordyceps camponoti-rufipedis	Ascomycota	Sordariomycetes	Hypocreales	Ophiocordycipitaceae	Ensembl/Fungi	GCA_002591395.1	02/07/2019	de Bekker, C.; Ohm, R.A.; Evans, H.C.; Brachmann, A.; Hughes, D.P. Ant-infecting Ophiocordyceps genomes reveal a high diversity of potential behavioral manipulation genes and a possible major role for enterotoxins. 2017, Sci Rep 7(1):12508	28970504	Ophiocordyceps_camponoti-rufipedis	ophiocordyceps_camponoti_rufipedis_gca_002591395	negative
Ophiocordyceps polyrhachis-furcata BCC 54312	Ascomycota	Sordariomycetes	Hypocreales	Ophiocordycipitaceae	NCBI/GenBank	GCA_001633055.2	02/07/2019	Wichadakul, D.; Kobmoo, N.; Ingsriswang, S.; Tangphatsornruang, S.; Chantasingh, D.; Luangsa-ard, J.J.; Eurwilaichitr, L. Insights from the genome of Ophiocordyceps polyrhachis-furcata to pathogenicity and host specificity in insect fungi. 2015, BMC Genomics 16(None):881	26511477	Ophiocordyceps_polyrhachis-furcata_BCC_54312	Ophiocordyceps_polyrhachis-furcata	negative
Ophiocordyceps sinensis	Ascomycota	Sordariomycetes	Hypocreales	Ophiocordycipitaceae	NCBI/GenBank	GCA_012934285.1	17/05/2021	Shu, R.; Zhang, J.; Meng, Q.; Zhang, H.; Zhou, G.; Li, M.; Wu, P.; Zhao, Y.; Chen, C.; Qin, Q. A New High-Quality Draft Genome Assembly of the Chinese Cordyceps Ophiocordyceps sinensis. 2020, Genome Biol Evol 12(7):1074-1079	32579174	Ophiocordyceps_sinensis	Ophiocordyceps_sinensis	negative
Ophiocordyceps sinensis CO18	Ascomycota	Sordariomycetes	Hypocreales	Ophiocordycipitaceae	Ensembl/Fungi	GCA_000448365.1	02/07/2019	Hu; X.; Zhang; Y.; Xiao; G.; Zheng; P.; Xia; Y.; Zhang; X.; St Leger; R. J.; Liu; X.; & Wang; C.. Genome survey uncovers the secrets of sex and lifestyle in caterpillar fungus. 2013, Kexue Tongbao [Chinese Science Bulletin]; 58(23); 2846–2854.	https://doi.org/10.1007/s11434-013-5929-5	Ophiocordyceps_sinensis_CO18	ophiocordyceps_sinensis_co18_gca_000448365	negative
Ophiocordyceps sp. 'camponoti-leonardi'	Ascomycota	Sordariomycetes	Hypocreales	Ophiocordycipitaceae	NCBI/GenBank	GCA_003339455.1	02/07/2019	Kobmoo, N.; Wichadakul, D.; Arnamnart, N.; Rodríguez De La Vega, R.C.; Luangsa-Ard, J.J.; Giraud, T. A genome scan of diversifying selection in Ophiocordyceps zombie-ant fungi suggests a role for enterotoxins in co-evolution and host specificity. 2018, Mol Ecol 27(18):3582-3598	30052297	Ophiocordyceps_sp._camponoti-leonardi	Ophiocordyceps_sp._camponoti-leonardi_	negative
Ophiocordyceps sp. 'camponoti-saundersi'	Ascomycota	Sordariomycetes	Hypocreales	Ophiocordycipitaceae	NCBI/GenBank	GCA_003339415.1	02/07/2019	Kobmoo, N.; Wichadakul, D.; Arnamnart, N.; Rodríguez De La Vega, R.C.; Luangsa-Ard, J.J.; Giraud, T. A genome scan of diversifying selection in Ophiocordyceps zombie-ant fungi suggests a role for enterotoxins in co-evolution and host specificity. 2018, Mol Ecol 27(18):3582-3598	30052297	Ophiocordyceps_sp._camponoti-saundersi	Ophiocordyceps_sp._camponoti-saundersi_	negative
Ophiocordyceps unilateralis	Ascomycota	Sordariomycetes	Hypocreales	Ophiocordycipitaceae	Ensembl/Fungi	GCA_001272575.2	02/07/2019	de Bekker, C.; Ohm, R.A.; Evans, H.C.; Brachmann, A.; Hughes, D.P. Ant-infecting Ophiocordyceps genomes reveal a high diversity of potential behavioral manipulation genes and a possible major role for enterotoxins. 2017, Sci Rep 7(1):12508	28970504	Ophiocordyceps_unilateralis	ophiocordyceps_unilateralis_gca_001272575	negative
Ophiostoma novo-ulmi subsp. novo-ulmi H327	Ascomycota	Sordariomycetes	Ophiostomatales	Ophiostomataceae	JGI/Mycocosm	Ophnu1	01/06/2019	Forgetta, V.; Leveque, G.; Dias, J.; Grove, D.; Lyons, R.; Genik, S.; Wright, C.; Singh, S.; Peterson, N.; Zianni, M.; Kieleczawa, J.; Steen, R.; Perera, A.; Bintzler, D.; Adams, S.; Hintz, W.; Jacobi, V.; Bernier, L.; Levesque, R.; Dewar, K. Sequencing of the Dutch elm disease fungus genome using the Roche/454 GS-FLX Titanium System in a comparison of multiple genomics core facilities. 2013, J B…	23542132	Ophiostoma_novo-ulmi_subsp._novo-ulmi_H327	ophiostoma_novo-ulmi_subsp._novo-ulmi_h327	negative
Ophiostoma piceae UAMH 11346	Ascomycota	Sordariomycetes	Ophiostomatales	Ophiostomataceae	Ensembl/Fungi	GCA_000410735.1	02/07/2019	Haridas, S.; Wang, Y.; Lim, L.; Massoumi Alamouti, S.; Jackman, S.; Docking, R.; Robertson, G.; Birol, I.; Bohlmann, J.; Breuil, C. The genome and transcriptome of the pine saprophyte Ophiostoma piceae, and a comparison with the bark beetle-associated pine pathogen Grosmannia clavigera. 2013, BMC Genomics 14(None):373	23725015	Ophiostoma_piceae_UAMH_11346	ophiostoma_piceae_uamh_11346_gca_000410735	negative
Orpinomyces sp.	Chytridiomycota	Neocallimastigomycetes	Neocallimastigales	Neocallimastigaceae	JGI/Mycocosm	Orpsp1_1	26/06/2019	Youssef, N.H.; Couger, M.B.; Struchtemeyer, C.G.; Liggenstoffer, A.S.; Prade, R.A.; Najar, F.Z.; Atiyeh, H.K.; Wilkins, M.R.; Elshahed, M.S. The genome of the anaerobic fungus Orpinomyces sp. strain C1A reveals the unique evolutionary history of a remarkable plant biomass degrader. 2013, Appl Environ Microbiol 79(15):4620-34	23709508	Orpinomyces_sp.	orpinomyces_sp.	negative
Pachysolen tannophilus NRRL Y-2460	Ascomycota	Saccharomycetes	Saccharomycetales	Saccharomycetaceae	NCBI/GenBank	GCA_001661245.1	01/06/2019	Riley, R.; Haridas, S.; Wolfe, K.H.; Lopes, M.R.; Hittinger, C.T.; Göker, M.; Salamov, A.A.; Wisecaver, J.H.; Long, T.M.; Calvey, C.H.; Aerts, A.L.; Barry, K.W.; Choi, C.; Clum, A.; Coughlan, A.Y.; Deshpande, S.; Douglass, A.P.; Hanson, S.J.; Klenk, H.P.; LaButti, K.M.; Lapidus, A.; Lindquist, E.A.; Lipzen, A.M.; Meier-Kolthoff, J.P.; Ohm, R.A.; Otillar, R.P.; Pangilinan, J.L.; Peng, Y.; Rokas, A…	27535936	Pachysolen_tannophilus_NRRL_Y-2460	Pachysolen_tannophilus	negative
Panaeolus cyanescens	Basidiomycota	Agaricomycetes	Agaricales	Bolbitiaceae	NCBI/GenBank	GCA_002938355.1	02/07/2019	Reynolds, H.T.; Vijayakumar, V.; Gluck-Thaler, E.; Korotkin, H.B.; Matheny, P.B.; Slot, J.C. Horizontal gene cluster transfer increased hallucinogenic mushroom diversity. 2018, Evol Lett 2(2):88-101	30283667	Panaeolus_cyanescens	Panaeolus_cyanescens	negative
Panaeolus papilionaceus	Basidiomycota	Agaricomycetes	Agaricales	Bolbitiaceae	JGI/Mycocosm	Panpap1	20/04/2021	Ruiz-Dueñas, F.J.; Barrasa, J.M.; Sánchez-García, M.; Camarero, S.; Miyauchi, S.; Serrano, A.; Linde, D.; Babiker, R.; Drula, E.; Ayuso-Fernández, I.; Pacheco, R.; Padilla, G.; Ferreira, P.; Barriuso, J.; Kellner, H.; Castanera, R.; Alfaro, M.; Ramírez, L.; Pisabarro, A.G.; Riley, R.; Kuo, A.; Andreopoulos, W.; LaButti, K.; Pangilinan, J.; Tritt, A.; Lipzen, A.; He, G.; Yan, M.; Ng, V.; Grigoriev…	33211093	Panaeolus_papilionaceus	panaeolus_papilionaceus_cirm-brfm_715	negative
Panus rudis PR-1116 ss-1	Basidiomycota	Agaricomycetes	Polyporales	Panaceae	JGI/Mycocosm	Panru1	20/04/2021	Hage, H.; Miyauchi, S.; Virágh, M.; Drula, E.; Min, B.; Chaduli, D.; Navarro, D.; Favel, A.; Norest, M.; Lesage-Meessen, L.; Bálint, B.; Merényi, Z.; de Eugenio, L.; Morin, E.; Martínez, A.T.; Baldrian, P.; Štursová, M.; Martínez, M.J.; Novotny, C.; Magnuson, J.K.; Spatafora, J.W.; Maurice, S.; Pangilinan, J.; Andreopoulos, W.; LaButti, K.; Hundley, H.; Na, H.; Kuo, A.; Barry, K.; Lipzen, A.; Hen…	33538380	Panus_rudis_PR-1116_ss-1	panus_rudis_pr-1116_ss-1	negative
Paracoccidioides brasiliensis Pb18	Ascomycota	Eurotiomycetes	Onygenales		NCBI/RefSeq	GCF_000150735.1	01/06/2019	Desjardins, C.A.; Champion, M.D.; Holder, J.W.; Muszewska, A.; Goldberg, J.; Bailão, A.M.; Brigido, M.M.; Ferreira, M.E.; Garcia, A.M.; Grynberg, M.; Gujja, S.; Heiman, D.I.; Henn, M.R.; Kodira, C.D.; León-Narváez, H.; Longo, L.V.; Ma, L.J.; Malavazi, I.; Matsuo, A.L.; Morais, F.V.; Pereira, M.; Rodríguez-Brito, S.; Sakthikumar, S.; Salem-Izacc, S.M.; Sykes, S.M.; Teixeira, M.M.; Vallejo, M.C.; W…	22046142	Paracoccidioides_brasiliensis_Pb18	Paracoccidioides_brasiliensis	negative
Paracoccidioides lutzii Pb01	Ascomycota	Eurotiomycetes	Onygenales		Ensembl/Fungi	GCA_000150705.2	02/07/2019	Desjardins, C.A.; Champion, M.D.; Holder, J.W.; Muszewska, A.; Goldberg, J.; Bailão, A.M.; Brigido, M.M.; Ferreira, M.E.; Garcia, A.M.; Grynberg, M.; Gujja, S.; Heiman, D.I.; Henn, M.R.; Kodira, C.D.; León-Narváez, H.; Longo, L.V.; Ma, L.J.; Malavazi, I.; Matsuo, A.L.; Morais, F.V.; Pereira, M.; Rodríguez-Brito, S.; Sakthikumar, S.; Salem-Izacc, S.M.; Sykes, S.M.; Teixeira, M.M.; Vallejo, M.C.; W…	22046142	Paracoccidioides_lutzii_Pb01	paracoccidioides_sp_lutzii_pb01_gca_000150705	negative
Paramicrosporidium saccamoebae	Cryptomycota				Ensembl/Fungi	GCA_002794465.1	02/07/2019	Quandt, C.A.; Beaudet, D.; Corsaro, D.; Walochnik, J.; Michel, R.; Corradi, N.; James, T.Y. The genome of an intranuclear parasite, <i>Paramicrosporidium saccamoebae</i>, reveals alternative adaptations to obligate intracellular parasitism. 2017, Elife 6(None):None	29171834	Paramicrosporidium_saccamoebae	paramicrosporidium_saccamoebae_gca_002794465	negative
Paraphaeosphaeria minitans	Ascomycota	Dothideomycetes	Pleosporales	Didymosphaeriaceae	NCBI/GenBank	GCA_015832175.1	17/05/2021	Patel, D.; Shittu, T.A.; Baroncelli, R.; Muthumeenakshi, S.; Osborne, T.H.; Janganan, T.K.; Sreenivasaprasad, S. Genome Sequence of the Biocontrol Agent <i>Coniothyrium minitans</i> Conio (IMI 134523). 2021, Mol Plant Microbe Interact 34(2):222-225	33118857	Paraphaeosphaeria_minitans	Paraphaeosphaeria_minitans	negative
Paraphaeosphaeria sporulosa	Ascomycota	Dothideomycetes	Pleosporales	Didymosphaeriaceae	Ensembl/Fungi	GCA_001642045.1	02/07/2019	Zeiner, C.A.; Purvine, S.O.; Zink, E.M.; Paša-Tolić, L.; Chaput, D.L.; Haridas, S.; Wu, S.; LaButti, K.; Grigoriev, I.V.; Henrissat, B.; Santelli, C.M.; Hansel, C.M. Comparative Analysis of Secretome Profiles of Manganese(II)-Oxidizing Ascomycete Fungi. 2016, PLoS One 11(7):e0157844	27434633	Paraphaeosphaeria_sporulosa	paraphaeosphaeria_sporulosa_gca_001642045	negative
Parastagonospora nodorum SN15	Ascomycota	Dothideomycetes	Pleosporales	Phaeosphaeriaceae	Ensembl/Fungi	GCA_000146915.1	02/07/2019	Hane, J.K.; Lowe, R.G.; Solomon, P.S.; Tan, K.C.; Schoch, C.L.; Spatafora, J.W.; Crous, P.W.; Kodira, C.; Birren, B.W.; Galagan, J.E.; Torriani, S.F.; McDonald, B.A.; Oliver, R.P. Dothideomycete plant interactions illuminated by genome sequencing and EST analysis of the wheat pathogen Stagonospora nodorum. 2007, Plant Cell 19(11):3347-68	18024570	Parastagonospora_nodorum_SN15	phaeosphaeria_nodorum	negative
Parauncinula polyspora	Ascomycota	Leotiomycetes	Erysiphales	Erysiphaceae	JGI/Mycocosm	Parpo1	20/04/2021	Frantzeskakis, L.; Németh, M.Z.; Barsoum, M.; Kusch, S.; Kiss, L.; Takamatsu, S.; Panstruga, R. The <i>Parauncinula polyspora</i> Draft Genome Provides Insights into Patterns of Gene Erosion and Genome Expansion in Powdery Mildew Fungi. 2019, mBio 10(5):None	31551331	Parauncinula_polyspora	parauncinula_polyspora	negative
Passalora fulva	Ascomycota	Dothideomycetes	Capnodiales	Mycosphaerellaceae	JGI/Mycocosm	Clafu1	01/06/2019	de Wit, P.J.; van der Burgt, A.; Ökmen, B.; Stergiopoulos, I.; Abd-Elsalam, K.A.; Aerts, A.L.; Bahkali, A.H.; Beenen, H.G.; Chettri, P.; Cox, M.P.; Datema, E.; de Vries, R.P.; Dhillon, B.; Ganley, A.R.; Griffiths, S.A.; Guo, Y.; Hamelin, R.C.; Henrissat, B.; Kabir, M.S.; Jashni, M.K.; Kema, G.; Klaubauf, S.; Lapidus, A.; Levasseur, A.; Lindquist, E.; Mehrabi, R.; Ohm, R.A.; Owen, T.J.; Salamov, A…	23209441	Passalora_fulva	cladosporium_fulvum	negative
Patellaria atrata	Ascomycota	Dothideomycetes	Patellariales	Patellariaceae	JGI/Mycocosm	Patat1	20/04/2021	Haridas, S.; Albert, R.; Binder, M.; Bloem, J.; LaButti, K.; Salamov, A.; Andreopoulos, B.; Baker, S.E.; Barry, K.; Bills, G.; Bluhm, B.H.; Cannon, C.; Castanera, R.; Culley, D.E.; Daum, C.; Ezra, D.; González, J.B.; Henrissat, B.; Kuo, A.; Liang, C.; Lipzen, A.; Lutzoni, F.; Magnuson, J.; Mondo, S.J.; Nolan, M.; Ohm, R.A.; Pangilinan, J.; Park, H.J.; Ramírez, L.; Alfaro, M.; Sun, H.; Tritt, A.; …	32206138	Patellaria_atrata	patellaria_atrata	negative
Paxillus adelphus	Basidiomycota	Agaricomycetes	Boletales	Paxillaceae	JGI/Mycocosm	Paxru2	01/06/2019	Kohler, A.; Kuo, A.; Nagy, L.G.; Morin, E.; Barry, K.W.; Buscot, F.; Canbäck, B.; Choi, C.; Cichocki, N.; Clum, A.; Colpaert, J.; Copeland, A.; Costa, M.D.; Doré, J.; Floudas, D.; Gay, G.; Girlanda, M.; Henrissat, B.; Herrmann, S.; Hess, J.; Högberg, N.; Johansson, T.; Khouja, H.R.; LaButti, K.; Lahrmann, U.; Levasseur, A.; Lindquist, E.A.; Lipzen, A.; Marmeisse, R.; Martino, E.; Murat, C.; Ngan,…	25706625	Paxillus_adelphus	paxillus_adelphus_ve08.2h10	negative
Paxillus ammoniavirescens	Basidiomycota	Agaricomycetes	Boletales	Paxillaceae	JGI/Mycocosm	Paxam1	20/04/2021	Miyauchi, S.; Kiss, E.; Kuo, A.; Drula, E.; Kohler, A.; Sánchez-García, M.; Morin, E.; Andreopoulos, B.; Barry, K.W.; Bonito, G.; Buée, M.; Carver, A.; Chen, C.; Cichocki, N.; Clum, A.; Culley, D.; Crous, P.W.; Fauchery, L.; Girlanda, M.; Hayes, R.D.; Kéri, Z.; LaButti, K.; Lipzen, A.; Lombard, V.; Magnuson, J.; Maillard, F.; Murat, C.; Nolan, M.; Ohm, R.A.; Pangilinan, J.; Pereira, M.F.; Perotto…	33046698	Paxillus_ammoniavirescens	paxillus_ammoniavirescens_pou09.2	negative
Paxillus involutus ATCC 200175	Basidiomycota	Agaricomycetes	Boletales	Paxillaceae	NCBI/GenBank	GCA_000827475.1	01/06/2019	Kohler, A.; Kuo, A.; Nagy, L.G.; Morin, E.; Barry, K.W.; Buscot, F.; Canbäck, B.; Choi, C.; Cichocki, N.; Clum, A.; Colpaert, J.; Copeland, A.; Costa, M.D.; Doré, J.; Floudas, D.; Gay, G.; Girlanda, M.; Henrissat, B.; Herrmann, S.; Hess, J.; Högberg, N.; Johansson, T.; Khouja, H.R.; LaButti, K.; Lahrmann, U.; Levasseur, A.; Lindquist, E.A.; Lipzen, A.; Marmeisse, R.; Martino, E.; Murat, C.; Ngan,…	25706625	Paxillus_involutus_ATCC_200175	Paxillus_involutus	negative
Paxillus rubicundulus Ve08.2h10	Basidiomycota	Agaricomycetes	Boletales	Paxillaceae	Ensembl/Fungi	GCA_000827395.1	02/07/2019	Kohler, A.; Kuo, A.; Nagy, L.G.; Morin, E.; Barry, K.W.; Buscot, F.; Canbäck, B.; Choi, C.; Cichocki, N.; Clum, A.; Colpaert, J.; Copeland, A.; Costa, M.D.; Doré, J.; Floudas, D.; Gay, G.; Girlanda, M.; Henrissat, B.; Herrmann, S.; Hess, J.; Högberg, N.; Johansson, T.; Khouja, H.R.; LaButti, K.; Lahrmann, U.; Levasseur, A.; Lindquist, E.A.; Lipzen, A.; Marmeisse, R.; Martino, E.; Murat, C.; Ngan,…	25706625	Paxillus_rubicundulus_Ve08.2h10	paxillus_rubicundulus_ve08_2h10_gca_000827395	negative
Peltaster fructicola	Ascomycota	Dothideomycetes			NCBI/GenBank	GCA_001592805.2	17/05/2021	Xu, C.; Chen, H.; Gleason, M.L.; Xu, J.R.; Liu, H.; Zhang, R.; Sun, G. Peltaster fructicola genome reveals evolution from an invasive phytopathogen to an ectophytic parasite. 2016, Sci Rep 6(None):22926	26964666	Peltaster_fructicola	Peltaster_fructicola	negative
Penicilliopsis zonata CBS 506.65	Ascomycota	Eurotiomycetes	Eurotiales	Aspergillaceae	Ensembl/Fungi	GCA_001890105.1	02/07/2019	de Vries, R.P.; Riley, R.; Wiebenga, A.; Aguilar-Osorio, G.; Amillis, S.; Uchima, C.A.; Anderluh, G.; Asadollahi, M.; Askin, M.; Barry, K.; Battaglia, E.; Bayram, Ö.; Benocci, T.; Braus-Stromeyer, S.A.; Caldana, C.; Cánovas, D.; Cerqueira, G.C.; Chen, F.; Chen, W.; Choi, C.; Clum, A.; Dos Santos, R.A.; Damásio, A.R.; Diallinas, G.; Emri, T.; Fekete, E.; Flipphi, M.; Freyberg, S.; Gallo, A.; Gourn…	28196534	Penicilliopsis_zonata_CBS_506.65	penicilliopsis_zonata_cbs_506_65_gca_001890105	negative
Penicillium antarcticum	Ascomycota	Eurotiomycetes	Eurotiales	Aspergillaceae	Ensembl/Fungi	GCA_002072345.1	02/07/2019	Nielsen, J.C.; Grijseels, S.; Prigent, S.; Ji, B.; Dainat, J.; Nielsen, K.F.; Frisvad, J.C.; Workman, M.; Nielsen, J. Global analysis of biosynthetic gene clusters reveals vast potential of secondary metabolite production in Penicillium species. 2017, Nat Microbiol 2(None):17044	28368369	Penicillium_antarcticum	penicillium_antarcticum_gca_002072345	positive
Penicillium arizonense	Ascomycota	Eurotiomycetes	Eurotiales	Aspergillaceae	Ensembl/Fungi	GCA_001773325.1	02/07/2019	Grijseels, S.; Nielsen, J.C.; Randelovic, M.; Nielsen, J.; Nielsen, K.F.; Workman, M.; Frisvad, J.C. Penicillium arizonense, a new, genome sequenced fungal species, reveals a high chemical diversity in secreted metabolites. 2016, Sci Rep 6(None):35112	27739446	Penicillium_arizonense	penicillium_arizonense_gca_001773325	negative
Penicillium brasilianum	Ascomycota	Eurotiomycetes	Eurotiales	Aspergillaceae	Ensembl/Fungi	GCA_001048715.1	02/07/2019	Horn, F.; Linde, J.; Mattern, D.J.; Walther, G.; Guthke, R.; Brakhage, A.A.; Valiante, V. Draft Genome Sequence of the Fungus Penicillium brasilianum MG11. 2015, Genome Announc 3(5):None	26337871	Penicillium_brasilianum	penicillium_brasilianum_gca_001048715	negative
Penicillium camemberti FM 013	Ascomycota	Eurotiomycetes	Eurotiales	Aspergillaceae	Ensembl/Fungi	GCA_000513335.1	02/07/2019	Cheeseman, K.; Ropars, J.; Renault, P.; Dupont, J.; Gouzy, J.; Branca, A.; Abraham, A.L.; Ceppi, M.; Conseiller, E.; Debuchy, R.; Malagnac, F.; Goarin, A.; Silar, P.; Lacoste, S.; Sallet, E.; Bensimon, A.; Giraud, T.; Brygoo, Y. Multiple recent horizontal transfers of a large genomic region in cheese making fungi. 2014, Nat Commun 5(None):2876	24407037	Penicillium_camemberti_FM_013	penicillium_camemberti_fm_013_gca_000513335	negative
Penicillium coprophilum	Ascomycota	Eurotiomycetes	Eurotiales	Aspergillaceae	Ensembl/Fungi	GCA_002072405.1	02/07/2019	Nielsen, J.C.; Grijseels, S.; Prigent, S.; Ji, B.; Dainat, J.; Nielsen, K.F.; Frisvad, J.C.; Workman, M.; Nielsen, J. Global analysis of biosynthetic gene clusters reveals vast potential of secondary metabolite production in Penicillium species. 2017, Nat Microbiol 2(None):17044	28368369	Penicillium_coprophilum	penicillium_coprophilum_gca_002072405	negative
Penicillium decumbens	Ascomycota	Eurotiomycetes	Eurotiales	Aspergillaceae	Ensembl/Fungi	GCA_002072245.1	02/07/2019	Nielsen, J.C.; Grijseels, S.; Prigent, S.; Ji, B.; Dainat, J.; Nielsen, K.F.; Frisvad, J.C.; Workman, M.; Nielsen, J. Global analysis of biosynthetic gene clusters reveals vast potential of secondary metabolite production in Penicillium species. 2017, Nat Microbiol 2(None):17044	28368369	Penicillium_decumbens	penicillium_decumbens_gca_002072245	negative
Penicillium digitatum PHI26	Ascomycota	Eurotiomycetes	Eurotiales	Aspergillaceae	Ensembl/Fungi	GCA_000315665.1	02/07/2019	Marcet-Houben, M.; Ballester, A.R.; de la Fuente, B.; Harries, E.; Marcos, J.F.; González-Candelas, L.; Gabaldón, T. Genome sequence of the necrotrophic fungus Penicillium digitatum, the main postharvest pathogen of citrus. 2012, BMC Genomics 13(None):646	23171342	Penicillium_digitatum_PHI26	penicillium_digitatum_phi26_gca_000315665	negative
Penicillium digitatum Pd1	Ascomycota	Eurotiomycetes	Eurotiales	Aspergillaceae	NCBI/RefSeq	GCF_000315645.1	17/05/2021	Marcet-Houben, M.; Ballester, A.R.; de la Fuente, B.; Harries, E.; Marcos, J.F.; González-Candelas, L.; Gabaldón, T. Genome sequence of the necrotrophic fungus Penicillium digitatum, the main postharvest pathogen of citrus. 2012, BMC Genomics 13(None):646	23171342	Penicillium_digitatum_Pd1	Penicillium_digitatum_Pd1	negative
Penicillium expansum	Ascomycota	Eurotiomycetes	Eurotiales	Aspergillaceae	Ensembl/Fungi	GCA_000769745.1	02/07/2019	Ballester, A.R.; Marcet-Houben, M.; Levin, E.; Sela, N.; Selma-Lázaro, C.; Carmona, L.; Wisniewski, M.; Droby, S.; González-Candelas, L.; Gabaldón, T. Genome, Transcriptome, and Functional Analyses of Penicillium expansum Provide New Insights Into Secondary Metabolism and Pathogenicity. 2015, Mol Plant Microbe Interact 28(3):232-48	25338147	Penicillium_expansum	penicillium_expansum_gca_000769745	negative
Penicillium flavigenum	Ascomycota	Eurotiomycetes	Eurotiales	Aspergillaceae	Ensembl/Fungi	GCA_002072365.1	02/07/2019	Nielsen, J.C.; Grijseels, S.; Prigent, S.; Ji, B.; Dainat, J.; Nielsen, K.F.; Frisvad, J.C.; Workman, M.; Nielsen, J. Global analysis of biosynthetic gene clusters reveals vast potential of secondary metabolite production in Penicillium species. 2017, Nat Microbiol 2(None):17044	28368369	Penicillium_flavigenum	penicillium_flavigenum_gca_002072365	negative
Penicillium freii	Ascomycota	Eurotiomycetes	Eurotiales	Aspergillaceae	Ensembl/Fungi	GCA_001513925.1	02/07/2019	Wingfield, B.D.; Ambler, J.M.; Coetzee, M.P.; de Beer, Z.W.; Duong, T.A.; Joubert, F.; Hammerbacher, A.; McTaggart, A.R.; Naidoo, K.; Nguyen, H.D.; Ponomareva, E.; Santana, Q.S.; Seifert, K.A.; Steenkamp, E.T.; Trollip, C.; van der Nest, M.A.; Visagie, C.M.; Wilken, P.M.; Wingfield, M.J.; Yilmaz, N. IMA Genome-F 6: Draft genome sequences of Armillaria fuscipes, Ceratocystiopsis minuta, Ceratocyst…	27433447	Penicillium_freii	penicillium_freii_gca_001513925	negative
Penicillium griseofulvum	Ascomycota	Eurotiomycetes	Eurotiales	Aspergillaceae	Ensembl/Fungi	GCA_001561935.1	02/07/2019	Banani, H.; Marcet-Houben, M.; Ballester, A.R.; Abbruscato, P.; González-Candelas, L.; Gabaldón, T.; Spadaro, D. Genome sequencing and secondary metabolism of the postharvest pathogen Penicillium griseofulvum. 2016, BMC Genomics 17(None):19	26729047	Penicillium_griseofulvum	penicillium_griseofulvum_gca_001561935	negative
Penicillium italicum	Ascomycota	Eurotiomycetes	Eurotiales	Aspergillaceae	Ensembl/Fungi	GCA_000769765.1	02/07/2019	Ballester, A.R.; Marcet-Houben, M.; Levin, E.; Sela, N.; Selma-Lázaro, C.; Carmona, L.; Wisniewski, M.; Droby, S.; González-Candelas, L.; Gabaldón, T. Genome, Transcriptome, and Functional Analyses of Penicillium expansum Provide New Insights Into Secondary Metabolism and Pathogenicity. 2015, Mol Plant Microbe Interact 28(3):232-48	25338147	Penicillium_italicum	penicillium_italicum_gca_000769765	negative
Penicillium nalgiovense	Ascomycota	Eurotiomycetes	Eurotiales	Aspergillaceae	Ensembl/Fungi	GCA_002072425.1	02/07/2019	Nielsen, J.C.; Grijseels, S.; Prigent, S.; Ji, B.; Dainat, J.; Nielsen, K.F.; Frisvad, J.C.; Workman, M.; Nielsen, J. Global analysis of biosynthetic gene clusters reveals vast potential of secondary metabolite production in Penicillium species. 2017, Nat Microbiol 2(None):17044	28368369	Penicillium_nalgiovense	penicillium_nalgiovense_gca_002072425	negative
[truncated: 392 more rows]

## Sheet: SM5 - Phylogenetic placement of
taxon	amplicon_id	primer	block	length	labels	weights	diamond_hit_id	diamond_evalue	diamond_idperc	fardb_hit_id	fardb_evalue	fardb_percid	fardb_description	klass	order	family	source	seqid	xstart	xend	genes
[truncated: 577 more rows]

## Sheet: SM6 - Crossvalidation
amplicon_id	length	klass	labels_1	labels_2	labels_3	labels_4	labels_5	same_label	weights	number_of_changes
[truncated: 13 more rows]

## Sheet: SM7- Phylogenetic placement of 
organism	amplicon_id	count	length	block	pair	labels	weights	diamond_hit_id	diamond_evalue	diamond_idperc	diamond_label	fardb_hit_id	fardb_evalue	fardb_percid	fardb_description
[truncated: 48 more rows]

[truncated: 1 more sheets: SM8-Outlier sequences detected]
