# Supplementary material for: Rational deployment of molecular markers for the benzenediol lactones and related compounds biosynthesis in filamentous fungi
Source: PeerJ journal article supplement (doi:10.7717/peerj.20472), 2025-12-19
Supplement: Supporting_Data.zip [file phyloplace_ksat_FINAL.xlsx]

## Sheet: summary
amplicon_id	count	length	labels	weights	diamond_hit_id	diamond_evalue	diamond_idperc	diamond_label	fardb_hit_id	fardb_evalue	fardb_percid	fardb_description	orig_amplicon_id
Alternaria_arborescens__gene-AA0111_g11123	1	8261	hr_pks	100	aspergillus_calidoustus_gca_001511075__gene___ASPCAL07647	5.79e-93	35.6	hr_pks	sp|Q86ZD9|SQTKS_PHOSC	2.7e-275	31.4	sp|Q86ZD9|SQTKS_PHOSC Squalestatin tetraketide synthase OS=Phoma sp. (strain C2932) OX=86977 GN=pks1 PE=1 SV=1	Alternaria_arborescens__gene-AA0111_g11123
Alternaria_arborescens__gene-AA0111_g12579	1	12463	hr_pks	100	sp|A0A0E4AZP0|FSA1_FUSSF	2.85e-171	45.7	hr_pks	sp|S0DS59|EQXS_GIBF5	0	42.5	sp|S0DS59|EQXS_GIBF5 Trichosetin synthetase PKS-NRPS1 OS=Gibberella fujikuroi (strain CBS 195.34 / IMI 58289 / NRRL A-6831) OX=1279085 GN=PKS-NRPS1 PE=2 SV=1	Alternaria_arborescens__gene-AA0111_g12579
Alternaria_arborescens__gene-AA0111_g329	1	6536	OTHER	100	sp|P9WET3|PREU8_PREIS	0	84.2	OTHER	sp|A7UMW1|PKS1_ELSFA	0	62.6	sp|A7UMW1|PKS1_ELSFA Non-reducing polyketide synthase 1 OS=Elsinoe fawcettii OX=40997 GN=PKS1 PE=2 SV=1	Alternaria_arborescens__gene-AA0111_g329
Alternaria_arborescens__gene-AA0111_g4204	1	6888	hr_pks	100	sp|Q2ABP6|PKSF_ALTSO	0	84.7	hr_pks	sp|Q2ABP6|PKSF_ALTSO	0	85.3	sp|Q2ABP6|PKSF_ALTSO Reducing polyketide synthase pksF OS=Alternaria solani OX=48100 GN=pksF PE=1 SV=1	Alternaria_arborescens__gene-AA0111_g4204
Alternaria_arborescens__gene-AA0111_g4591	1	1283	OUTLIER	*	None	None	None	None	sp|Q99UN8|FABD_STAAM	6.35e-27	30.1	sp|Q99UN8|FABD_STAAM Malonyl CoA-acyl carrier protein transacylase OS=Staphylococcus aureus (strain Mu50 / ATCC 700699) OX=158878 GN=fabD PE=1 SV=1	Alternaria_arborescens__gene-AA0111_g4591
Alternaria_arborescens__gene-AA0111_g4622	1	7920	hr_pks	100	BGC0001899__CBX99534.1	3.68e-321	54	hr_pks	sp|E5A7D9|PKS5_LEPMJ	0	47.6	sp|E5A7D9|PKS5_LEPMJ Highly reducing polyketide synthase pks5 OS=Leptosphaeria maculans (strain JN3 / isolate v23.1.3 / race Av1-4-5-6-7-8) OX=985895 GN=pks5 PE=2 SV=1	Alternaria_arborescens__gene-AA0111_g4622
Alternaria_arborescens__gene-AA0111_g4695	1	7850	hr_pks	100	Ophiocordyceps_sinensis__gene-G6O67_007912	2.75e-225	47.7	hr_pks	sp|Q5KTM9|ALT5_ALTSO	0	35.3	sp|Q5KTM9|ALT5_ALTSO Highly reducing polyketide synthase alt5 OS=Alternaria solani OX=48100 GN=alt5 PE=1 SV=1	Alternaria_arborescens__gene-AA0111_g4695
Alternaria_arborescens__gene-AA0111_g4699	1	5025	OTHER	100	sp|P9WQE0|PPSE_MYCTO	1e-49	38.1	OTHER	sp|G4N137|TAS1_MAGO7	4.5e-172	38.8	sp|G4N137|TAS1_MAGO7 Hybrid PKS-NRPS synthetase TAS1 OS=Magnaporthe oryzae (strain 70-15 / ATCC MYA-4617 / FGSC 8958) OX=242507 GN=TAS1 PE=1 SV=1	Alternaria_arborescens__gene-AA0111_g4699
Alternaria_arborescens__gene-AA0111_g621	1	5798	OTHER	100	BGC0001284__AKN45693.1	0	87.1	OTHER	sp|A0A0H4ADX3|PKS19_PHANO	0	76.9	sp|A0A0H4ADX3|PKS19_PHANO Non-reducing polyketide synthase PKS19 OS=Phaeosphaeria nodorum (strain SN15 / ATCC MYA-4574 / FGSC 10173) OX=321614 PE=2 SV=1	Alternaria_arborescens__gene-AA0111_g621
Alternaria_arborescens__gene-AA0111_g7048	1	8117	OTHER	100	sp|A0A8F4SKJ7|ATR1_STEAL	1.56e-305	54.2	OTHER	sp|A0A193PS74|STBA_STABI	3.5e-300	39.7	sp|A0A193PS74|STBA_STABI Non-reducing polyketide synthase stbA OS=Stachybotrys bisbyi OX=80385 GN=stbA PE=1 SV=1	Alternaria_arborescens__gene-AA0111_g7048
Alternaria_arborescens__gene-AA0111_g7515	1	6311	OUTLIER	*	None	None	None	None	sp|P34229|FAS1_YARLI	0	57.8	sp|P34229|FAS1_YARLI Fatty acid synthase subunit beta OS=Yarrowia lipolytica (strain CLIB 122 / E 150) OX=284591 GN=FAS1 PE=3 SV=2	Alternaria_arborescens__gene-AA0111_g7515
Alternaria_arborescens__gene-AA0111_g8241	1	7605	hr_pks	100	BGC0001866__XP_028481819.1	5.17e-262	48.7	hr_pks	sp|A0A6S5ZY48|G433_FUSSX	0	42	sp|A0A6S5ZY48|G433_FUSSX Highly reducing polyketide synthase g433 OS=Fusarium sp. OX=29916 GN=g433 PE=2 SV=1	Alternaria_arborescens__gene-AA0111_g8241
Alternaria_arborescens__gene-AA0111_g8689	1	2432	OTHER	100	BGC0001244__AIW00670.1	4.12e-11	31.4	OTHER	sp|Q8L3X9|KASM_ARATH	3.86e-57	45.3	sp|Q8L3X9|KASM_ARATH 3-oxoacyl-[acyl-carrier-protein] synthase, mitochondrial OS=Arabidopsis thaliana OX=3702 GN=KAS PE=1 SV=1	Alternaria_arborescens__gene-AA0111_g8689
Alternaria_arborescens__gene-AA0111_g966	1	7829	hr_pks	100	BGC0000012__BAD83684.1	1.22e-301	88.3	hr_pks	sp|Q5KTM9|ALT5_ALTSO	0	92.5	sp|Q5KTM9|ALT5_ALTSO Highly reducing polyketide synthase alt5 OS=Alternaria solani OX=48100 GN=alt5 PE=1 SV=1	Alternaria_arborescens__gene-AA0111_g966
Alternaria_arborescens__gene-AA0111_g9806	1	2932	hr_pks	100	BGC0001892__ATZ45182.1	4.89e-219	51.2	hr_pks	sp|B1GVX7|BOA6_BOTFB	9.88e-204	51.2	sp|B1GVX7|BOA6_BOTFB Reducing polyketide synthase BOA6 OS=Botryotinia fuckeliana (strain B05.10) OX=332648 GN=BOA6 PE=2 SV=1	Alternaria_arborescens__gene-AA0111_g9806
Alternaria_gaisen__gene-AG0111_g11675	1	7226	hr_pks	100	sp|V5Y0F7|AF161_ALTAL	0	96.8	hr_pks	sp|V5Y0F7|AF161_ALTAL	0	96.9	sp|V5Y0F7|AF161_ALTAL Reducing polyketide synthase AFT16-1 OS=Alternaria alternata OX=5599 GN=AFT16-1 PE=3 SV=1	Alternaria_gaisen__gene-AG0111_g11675
Alternaria_gaisen__gene-AG0111_g11686	1	7057	hr_pks	100	BGC0000003__BAD97694.1	4.75e-216	96.3	hr_pks	sp|Q50LG3|AFT91_ALTAL	0	95	sp|Q50LG3|AFT91_ALTAL Highly reducing polyketide synthase AFT9-1 OS=Alternaria alternata OX=5599 GN=AFT9-1 PE=3 SV=1	Alternaria_gaisen__gene-AG0111_g11686
Alternaria_gaisen__gene-AG0111_g12143	1	8261	hr_pks	100	aspergillus_calidoustus_gca_001511075__gene___ASPCAL07647	9.66e-94	36.1	hr_pks	sp|Q86ZD9|SQTKS_PHOSC	3.82e-282	32	sp|Q86ZD9|SQTKS_PHOSC Squalestatin tetraketide synthase OS=Phoma sp. (strain C2932) OX=86977 GN=pks1 PE=1 SV=1	Alternaria_gaisen__gene-AG0111_g12143
Alternaria_gaisen__gene-AG0111_g12339	1	8063	hr_pks	99.9	verruculina_enalia_cbs_304.66__e_gw1.333.8.1	3.56e-240	85.2	hr_pks	sp|K3VA96|W4931_FUSPC	0	65	sp|K3VA96|W4931_FUSPC Highly reducing polyketide synthase 40 OS=Fusarium pseudograminearum (strain CS3096) OX=1028729 GN=PKS40 PE=3 SV=1	Alternaria_gaisen__gene-AG0111_g12339
Alternaria_gaisen__gene-AG0111_g12784	1	1470	hr_pks	100	BGC0000003__BAD97694.1	1.2e-246	92.2	hr_pks	sp|Q50LG3|AFT91_ALTAL	1.02e-224	92.2	sp|Q50LG3|AFT91_ALTAL Highly reducing polyketide synthase AFT9-1 OS=Alternaria alternata OX=5599 GN=AFT9-1 PE=3 SV=1	Alternaria_gaisen__gene-AG0111_g12784
Alternaria_gaisen__gene-AG0111_g12785	1	813	hr_pks	100	BGC0000003__BAD97694.1	4.26e-149	90.1	hr_pks	sp|Q50LG3|AFT91_ALTAL	1.45e-137	90.1	sp|Q50LG3|AFT91_ALTAL Highly reducing polyketide synthase AFT9-1 OS=Alternaria alternata OX=5599 GN=AFT9-1 PE=3 SV=1	Alternaria_gaisen__gene-AG0111_g12785
Alternaria_gaisen__gene-AG0111_g12805	1	1095	hr_pks	100	sp|Q4WKW9|FGNA_ASPFU	7.27e-40	50.3	hr_pks	sp|Q4WKW9|FGNA_ASPFU	3.34e-37	50.3	sp|Q4WKW9|FGNA_ASPFU Fumigermin synthase OS=Neosartorya fumigata (strain ATCC MYA-4609 / Af293 / CBS 101355 / FGSC A1100) OX=330879 GN=fgnA PE=1 SV=1	Alternaria_gaisen__gene-AG0111_g12805
Alternaria_gaisen__gene-AG0111_g1363	1	12463	hr_pks	100	BGC0001255__AGO86662.1	8.38e-172	45.8	hr_pks	sp|S0DS59|EQXS_GIBF5	0	42.2	sp|S0DS59|EQXS_GIBF5 Trichosetin synthetase PKS-NRPS1 OS=Gibberella fujikuroi (strain CBS 195.34 / IMI 58289 / NRRL A-6831) OX=1279085 GN=PKS-NRPS1 PE=2 SV=1	Alternaria_gaisen__gene-AG0111_g1363
Alternaria_gaisen__gene-AG0111_g1997	1	7832	hr_pks	100	BGC0000012__BAD83684.1	5.19e-306	88.3	hr_pks	sp|Q5KTM9|ALT5_ALTSO	0	92.4	sp|Q5KTM9|ALT5_ALTSO Highly reducing polyketide synthase alt5 OS=Alternaria solani OX=48100 GN=alt5 PE=1 SV=1	Alternaria_gaisen__gene-AG0111_g1997
Alternaria_gaisen__gene-AG0111_g2760	1	5796	OTHER	100	BGC0001284__AKN45693.1	0	86.6	OTHER	sp|A0A0H4ADX3|PKS19_PHANO	0	85	sp|A0A0H4ADX3|PKS19_PHANO Non-reducing polyketide synthase PKS19 OS=Phaeosphaeria nodorum (strain SN15 / ATCC MYA-4574 / FGSC 10173) OX=321614 PE=2 SV=1	Alternaria_gaisen__gene-AG0111_g2760
Alternaria_gaisen__gene-AG0111_g3054	1	6539	OTHER	100	sp|P9WET3|PREU8_PREIS	0	84.5	OTHER	sp|A7UMW1|PKS1_ELSFA	0	63.1	sp|A7UMW1|PKS1_ELSFA Non-reducing polyketide synthase 1 OS=Elsinoe fawcettii OX=40997 GN=PKS1 PE=2 SV=1	Alternaria_gaisen__gene-AG0111_g3054
Alternaria_gaisen__gene-AG0111_g5046	1	4046	hr_pks	100	sp|Q2ABP6|PKSF_ALTSO	0	82.4	hr_pks	sp|Q2ABP6|PKSF_ALTSO	0	84	sp|Q2ABP6|PKSF_ALTSO Reducing polyketide synthase pksF OS=Alternaria solani OX=48100 GN=pksF PE=1 SV=1	Alternaria_gaisen__gene-AG0111_g5046
Alternaria_gaisen__gene-AG0111_g5423	1	1175	OUTLIER	*	None	None	None	None	sp|Q99UN8|FABD_STAAM	3.75e-27	30.1	sp|Q99UN8|FABD_STAAM Malonyl CoA-acyl carrier protein transacylase OS=Staphylococcus aureus (strain Mu50 / ATCC 700699) OX=158878 GN=fabD PE=1 SV=1	Alternaria_gaisen__gene-AG0111_g5423
Alternaria_gaisen__gene-AG0111_g5459	1	7920	hr_pks	100	BGC0001899__CBX99534.1	1.29e-319	54	hr_pks	sp|E5A7D9|PKS5_LEPMJ	0	47.5	sp|E5A7D9|PKS5_LEPMJ Highly reducing polyketide synthase pks5 OS=Leptosphaeria maculans (strain JN3 / isolate v23.1.3 / race Av1-4-5-6-7-8) OX=985895 GN=pks5 PE=2 SV=1	Alternaria_gaisen__gene-AG0111_g5459
Alternaria_gaisen__gene-AG0111_g5613	1	8114	OTHER	100	sp|A0A8F4SKJ7|ATR1_STEAL	6.42e-303	54.1	OTHER	sp|A0A455R5P9|ASCC_ACREG	1.34e-281	49.6	sp|A0A455R5P9|ASCC_ACREG Non-reducing polyketide synthase ascC OS=Acremonium egyptiacum OX=749675 GN=ascC PE=1 SV=1	Alternaria_gaisen__gene-AG0111_g5613
Alternaria_gaisen__gene-AG0111_g6031	1	4144	OUTLIER	*	None	None	None	None	sp|O74869|NIC1_SCHPO	1.23e-75	42.9	sp|O74869|NIC1_SCHPO High-affinity nickel transport protein nic1 OS=Schizosaccharomyces pombe (strain 972 / ATCC 24843) OX=284812 GN=nic1 PE=3 SV=3	Alternaria_gaisen__gene-AG0111_g6031
Alternaria_gaisen__gene-AG0111_g9082	1	5026	OTHER	100	sp|P9WQE0|PPSE_MYCTO	1.69e-47	37	OTHER	sp|G4N137|TAS1_MAGO7	1.01e-163	36.5	sp|G4N137|TAS1_MAGO7 Hybrid PKS-NRPS synthetase TAS1 OS=Magnaporthe oryzae (strain 70-15 / ATCC MYA-4617 / FGSC 8958) OX=242507 GN=TAS1 PE=1 SV=1	Alternaria_gaisen__gene-AG0111_g9082
Alternaria_gaisen__gene-AG0111_g9085	1	7838	hr_pks	100	Ophiocordyceps_sinensis__gene-G6O67_007912	1.9e-225	48.1	hr_pks	sp|Q5KTM9|ALT5_ALTSO	0	35.2	sp|Q5KTM9|ALT5_ALTSO Highly reducing polyketide synthase alt5 OS=Alternaria solani OX=48100 GN=alt5 PE=1 SV=1	Alternaria_gaisen__gene-AG0111_g9085
Alternaria_sp._MG1__gene10814	1	6887	hr_pks	100	sp|Q2ABP6|PKSF_ALTSO	0	82.7	hr_pks	sp|Q2ABP6|PKSF_ALTSO	0	85.1	sp|Q2ABP6|PKSF_ALTSO Reducing polyketide synthase pksF OS=Alternaria solani OX=48100 GN=pksF PE=1 SV=1	Alternaria_sp._MG1__gene10814
Alternaria_sp._MG1__gene12281	1	1277	OTHER	100	BGC0001244__AIW00670.1	1.3e-11	31.4	OTHER	sp|Q8L3X9|KASM_ARATH	8.27e-58	46.2	sp|Q8L3X9|KASM_ARATH 3-oxoacyl-[acyl-carrier-protein] synthase, mitochondrial OS=Arabidopsis thaliana OX=3702 GN=KAS PE=1 SV=1	Alternaria_sp._MG1__gene12281
Alternaria_sp._MG1__gene12976	1	1223	OTHER	100	sp|P9WQE0|PPSE_MYCTO	4.24e-50	37.6	OTHER	sp|G4N137|TAS1_MAGO7	3.56e-89	52.6	sp|G4N137|TAS1_MAGO7 Hybrid PKS-NRPS synthetase TAS1 OS=Magnaporthe oryzae (strain 70-15 / ATCC MYA-4617 / FGSC 8958) OX=242507 GN=TAS1 PE=1 SV=1	Alternaria_sp._MG1__gene12976
Alternaria_sp._MG1__gene2420	1	7850	hr_pks	100	Ophiocordyceps_sinensis__gene-G6O67_007912	1.89e-223	48	hr_pks	sp|Q5KTM9|ALT5_ALTSO	0	35.1	sp|Q5KTM9|ALT5_ALTSO Highly reducing polyketide synthase alt5 OS=Alternaria solani OX=48100 GN=alt5 PE=1 SV=1	Alternaria_sp._MG1__gene2420
Alternaria_sp._MG1__gene244	1	12463	hr_pks	100	BGC0001255__AGO86662.1	1.15e-173	45.8	hr_pks	sp|S0DS59|EQXS_GIBF5	0	42.7	sp|S0DS59|EQXS_GIBF5 Trichosetin synthetase PKS-NRPS1 OS=Gibberella fujikuroi (strain CBS 195.34 / IMI 58289 / NRRL A-6831) OX=1279085 GN=PKS-NRPS1 PE=2 SV=1	Alternaria_sp._MG1__gene244
Alternaria_sp._MG1__gene3606	1	7067	hr_pks	100	aspergillus_calidoustus_gca_001511075__gene___ASPCAL07647	4.24e-94	35.2	hr_pks	sp|Q86ZD9|SQTKS_PHOSC	5.51e-205	31.6	sp|Q86ZD9|SQTKS_PHOSC Squalestatin tetraketide synthase OS=Phoma sp. (strain C2932) OX=86977 GN=pks1 PE=1 SV=1	Alternaria_sp._MG1__gene3606
Alternaria_sp._MG1__gene3716	1	1509	hr_pks	100	alternaria_alternata_gca_001642055__gene___CC77DRAFT_1036418	1.61e-199	100	hr_pks	sp|A0A4P8DJV2|DMXL2_CRYX8	4.15e-107	41.5	sp|A0A4P8DJV2|DMXL2_CRYX8 Highly reducing polyketide synthase dmxL2 OS=Cryptosporiopsis sp. (strain 8999) OX=2572248 GN=dmxL2 PE=3 SV=1	Alternaria_sp._MG1__gene3716
Alternaria_sp._MG1__gene3717	1	1486	hr_pks	100	alternaria_alternata_gca_001642055__gene___CC77DRAFT_1036418	4.64e-145	64	hr_pks	sp|A0A0U5GK88|AUSV_ASPCI	3.06e-58	36.6	sp|A0A0U5GK88|AUSV_ASPCI Highly reducing polyketide synthase ausV OS=Aspergillus calidoustus OX=454130 GN=ausV PE=1 SV=1	Alternaria_sp._MG1__gene3717
Alternaria_sp._MG1__gene3871	1	8412	hr_pks	100	BGC0001899__CBX99534.1	1.06e-318	53.9	hr_pks	sp|E5A7D9|PKS5_LEPMJ	0	44.9	sp|E5A7D9|PKS5_LEPMJ Highly reducing polyketide synthase pks5 OS=Leptosphaeria maculans (strain JN3 / isolate v23.1.3 / race Av1-4-5-6-7-8) OX=985895 GN=pks5 PE=2 SV=1	Alternaria_sp._MG1__gene3871
Alternaria_sp._MG1__gene3905	1	1038	OUTLIER	*	None	None	None	None	sp|Q9R9J2|FENF_BACIU	3.06e-24	29.5	sp|Q9R9J2|FENF_BACIU Malonyl CoA-acyl carrier protein transacylase OS=Bacillus subtilis OX=1423 GN=fenF PE=1 SV=1	Alternaria_sp._MG1__gene3905
Alternaria_sp._MG1__gene5043	1	7826	hr_pks	100	BGC0000012__BAD83684.1	4.99e-306	89	hr_pks	sp|Q5KTM9|ALT5_ALTSO	0	92.9	sp|Q5KTM9|ALT5_ALTSO Highly reducing polyketide synthase alt5 OS=Alternaria solani OX=48100 GN=alt5 PE=1 SV=1	Alternaria_sp._MG1__gene5043
Alternaria_sp._MG1__gene6715	1	5312	OTHER	100	BGC0001284__AKN45693.1	0	87.3	OTHER	sp|A0A0H4ADX3|PKS19_PHANO	0	85.5	sp|A0A0H4ADX3|PKS19_PHANO Non-reducing polyketide synthase PKS19 OS=Phaeosphaeria nodorum (strain SN15 / ATCC MYA-4574 / FGSC 10173) OX=321614 PE=2 SV=1	Alternaria_sp._MG1__gene6715
Alternaria_sp._MG1__gene8965	1	6539	OTHER	100	sp|P9WET3|PREU8_PREIS	0	84.4	OTHER	sp|A7UMW1|PKS1_ELSFA	0	62.6	sp|A7UMW1|PKS1_ELSFA Non-reducing polyketide synthase 1 OS=Elsinoe fawcettii OX=40997 GN=PKS1 PE=2 SV=1	Alternaria_sp._MG1__gene8965
Alternaria_sp._MG1__gene9754	1	6311	OUTLIER	*	None	None	None	None	sp|P34229|FAS1_YARLI	0	57.8	sp|P34229|FAS1_YARLI Fatty acid synthase subunit beta OS=Yarrowia lipolytica (strain CLIB 122 / E 150) OX=284591 GN=FAS1 PE=3 SV=2	Alternaria_sp._MG1__gene9754
Alternaria_tenuissima__gene-AA0116_g10117	1	8812	hr_pks	100	BGC0001264__BAQ25466.1	3.38e-290	81.9	hr_pks	sp|A0A0C6E0I7|BET1_NEOBT	0	81.8	sp|A0A0C6E0I7|BET1_NEOBT Highly reducing polyketide synthase bet1 OS=Neocamarosporium betae OX=1979465 GN=bet1 PE=1 SV=1	Alternaria_tenuissima__gene-AA0116_g10117
Alternaria_tenuissima__gene-AA0116_g11694	1	5026	OTHER	100	sp|P9WQE0|PPSE_MYCTO	1.69e-47	37	OTHER	sp|G4N137|TAS1_MAGO7	1.78e-162	36.4	sp|G4N137|TAS1_MAGO7 Hybrid PKS-NRPS synthetase TAS1 OS=Magnaporthe oryzae (strain 70-15 / ATCC MYA-4617 / FGSC 8958) OX=242507 GN=TAS1 PE=1 SV=1	Alternaria_tenuissima__gene-AA0116_g11694
Alternaria_tenuissima__gene-AA0116_g11698	1	7838	hr_pks	100	Ophiocordyceps_sinensis__gene-G6O67_007912	9.9e-226	48	hr_pks	sp|Q5KTM9|ALT5_ALTSO	0	35.3	sp|Q5KTM9|ALT5_ALTSO Highly reducing polyketide synthase alt5 OS=Alternaria solani OX=48100 GN=alt5 PE=1 SV=1	Alternaria_tenuissima__gene-AA0116_g11698
Alternaria_tenuissima__gene-AA0116_g12644	1	5348	OTHER	100	BGC0001244__AIW00670.1	1.87e-296	54.8	OTHER	sp|A0A0A0RM07|MLNS_PHANO	0	45.9	sp|A0A0A0RM07|MLNS_PHANO Mellein synthase OS=Phaeosphaeria nodorum (strain SN15 / ATCC MYA-4574 / FGSC 10173) OX=321614 GN=MLNS PE=1 SV=1	Alternaria_tenuissima__gene-AA0116_g12644
Alternaria_tenuissima__gene-AA0116_g12873	1	2703	OTHER	100	BGC0001244__AIW00670.1	6.78e-317	55.9	OTHER	sp|A0A0A0RM07|MLNS_PHANO	1.54e-306	55.7	sp|A0A0A0RM07|MLNS_PHANO Mellein synthase OS=Phaeosphaeria nodorum (strain SN15 / ATCC MYA-4574 / FGSC 10173) OX=321614 GN=MLNS PE=1 SV=1	Alternaria_tenuissima__gene-AA0116_g12873
Alternaria_tenuissima__gene-AA0116_g12875	1	465	OTHER	100	BGC0001244__AIW00670.1	6.66e-43	55.5	OTHER	sp|A0A0A0RM07|MLNS_PHANO	2.45e-40	55.5	sp|A0A0A0RM07|MLNS_PHANO Mellein synthase OS=Phaeosphaeria nodorum (strain SN15 / ATCC MYA-4574 / FGSC 10173) OX=321614 GN=MLNS PE=1 SV=1	Alternaria_tenuissima__gene-AA0116_g12875
Alternaria_tenuissima__gene-AA0116_g13374	1	5372	OTHER	100	BGC0001244__AIW00670.1	5.53e-301	55.2	OTHER	sp|A0A0A0RM07|MLNS_PHANO	0	46.8	sp|A0A0A0RM07|MLNS_PHANO Mellein synthase OS=Phaeosphaeria nodorum (strain SN15 / ATCC MYA-4574 / FGSC 10173) OX=321614 GN=MLNS PE=1 SV=1	Alternaria_tenuissima__gene-AA0116_g13374
Alternaria_tenuissima__gene-AA0116_g136	1	8261	hr_pks	100	aspergillus_calidoustus_gca_001511075__gene___ASPCAL07647	3.3e-96	35	hr_pks	sp|Q86ZD9|SQTKS_PHOSC	1.91e-281	31.9	sp|Q86ZD9|SQTKS_PHOSC Squalestatin tetraketide synthase OS=Phoma sp. (strain C2932) OX=86977 GN=pks1 PE=1 SV=1	Alternaria_tenuissima__gene-AA0116_g136
Alternaria_tenuissima__gene-AA0116_g1726	1	7027	OUTLIER	*	None	None	None	None	sp|P34229|FAS1_YARLI	0	57.8	sp|P34229|FAS1_YARLI Fatty acid synthase subunit beta OS=Yarrowia lipolytica (strain CLIB 122 / E 150) OX=284591 GN=FAS1 PE=3 SV=2	Alternaria_tenuissima__gene-AA0116_g1726
Alternaria_tenuissima__gene-AA0116_g187	1	12463	hr_pks	100	BGC0001255__AGO86662.1	7.24e-173	45.3	hr_pks	sp|S0DS59|EQXS_GIBF5	0	42.1	sp|S0DS59|EQXS_GIBF5 Trichosetin synthetase PKS-NRPS1 OS=Gibberella fujikuroi (strain CBS 195.34 / IMI 58289 / NRRL A-6831) OX=1279085 GN=PKS-NRPS1 PE=2 SV=1	Alternaria_tenuissima__gene-AA0116_g187
Alternaria_tenuissima__gene-AA0116_g2337	1	7826	hr_pks	100	BGC0000012__BAD83684.1	4.99e-306	89	hr_pks	sp|Q5KTM9|ALT5_ALTSO	0	92.9	sp|Q5KTM9|ALT5_ALTSO Highly reducing polyketide synthase alt5 OS=Alternaria solani OX=48100 GN=alt5 PE=1 SV=1	Alternaria_tenuissima__gene-AA0116_g2337
Alternaria_tenuissima__gene-AA0116_g3047	1	7919	hr_pks	100	BGC0001899__CBX99534.1	5.75e-278	56.1	hr_pks	sp|E5A7D9|PKS5_LEPMJ	0	48	sp|E5A7D9|PKS5_LEPMJ Highly reducing polyketide synthase pks5 OS=Leptosphaeria maculans (strain JN3 / isolate v23.1.3 / race Av1-4-5-6-7-8) OX=985895 GN=pks5 PE=2 SV=1	Alternaria_tenuissima__gene-AA0116_g3047
Alternaria_tenuissima__gene-AA0116_g3079	1	2650	OUTLIER	*	None	None	None	None	sp|Q99UN8|FABD_STAAM	7.44e-26	30.1	sp|Q99UN8|FABD_STAAM Malonyl CoA-acyl carrier protein transacylase OS=Staphylococcus aureus (strain Mu50 / ATCC 700699) OX=158878 GN=fabD PE=1 SV=1	Alternaria_tenuissima__gene-AA0116_g3079
Alternaria_tenuissima__gene-AA0116_g3447	1	6887	hr_pks	100	sp|Q2ABP6|PKSF_ALTSO	0	82.7	hr_pks	sp|Q2ABP6|PKSF_ALTSO	0	85.1	sp|Q2ABP6|PKSF_ALTSO Reducing polyketide synthase pksF OS=Alternaria solani OX=48100 GN=pksF PE=1 SV=1	Alternaria_tenuissima__gene-AA0116_g3447
Alternaria_tenuissima__gene-AA0116_g5794	1	2782	OTHER	100	BGC0001244__AIW00670.1	2.88e-11	31.4	OTHER	sp|Q8L3X9|KASM_ARATH	1.27e-61	39	sp|Q8L3X9|KASM_ARATH 3-oxoacyl-[acyl-carrier-protein] synthase, mitochondrial OS=Arabidopsis thaliana OX=3702 GN=KAS PE=1 SV=1	Alternaria_tenuissima__gene-AA0116_g5794
Alternaria_tenuissima__gene-AA0116_g6200	1	8114	OTHER	100	sp|A0A8F4SKJ7|ATR1_STEAL	1.83e-301	53.9	OTHER	sp|A0A455R5P9|ASCC_ACREG	8.93e-277	48.9	sp|A0A455R5P9|ASCC_ACREG Non-reducing polyketide synthase ascC OS=Acremonium egyptiacum OX=749675 GN=ascC PE=1 SV=1	Alternaria_tenuissima__gene-AA0116_g6200
Alternaria_tenuissima__gene-AA0116_g8562	1	5796	OTHER	100	BGC0001284__AKN45693.1	0	86.8	OTHER	sp|A0A0H4ADX3|PKS19_PHANO	0	84.2	sp|A0A0H4ADX3|PKS19_PHANO Non-reducing polyketide synthase PKS19 OS=Phaeosphaeria nodorum (strain SN15 / ATCC MYA-4574 / FGSC 10173) OX=321614 PE=2 SV=1	Alternaria_tenuissima__gene-AA0116_g8562
Alternaria_tenuissima__gene-AA0116_g8859	1	6539	OTHER	100	sp|P9WET3|PREU8_PREIS	0	84.4	OTHER	sp|A7UMW1|PKS1_ELSFA	0	62.6	sp|A7UMW1|PKS1_ELSFA Non-reducing polyketide synthase 1 OS=Elsinoe fawcettii OX=40997 GN=PKS1 PE=2 SV=1	Alternaria_tenuissima__gene-AA0116_g8859
Anthracocystis_flocculosa__gene0	1	9301	OTHER	100	sp|Q03132|ERYA2_SACER__2	4.09e-93	31.9	OTHER	sp|Q02251|MCAS_MYCBO	6.13e-83	31.5	sp|Q02251|MCAS_MYCBO Mycocerosic acid synthase OS=Mycobacterium bovis (strain ATCC BAA-935 / AF2122/97) OX=233413 GN=mas PE=1 SV=2	Anthracocystis_flocculosa__gene0
Anthracocystis_flocculosa__gene2614	1	2586	OUTLIER	*	None	None	None	None	sp|P71019|FABD_BACSU	4.67e-11	30.5	sp|P71019|FABD_BACSU Malonyl CoA-acyl carrier protein transacylase OS=Bacillus subtilis (strain 168) OX=224308 GN=fabD PE=3 SV=2	Anthracocystis_flocculosa__gene2614
Anthracocystis_flocculosa__gene3777	1	6085	OTHER	100	BGC0001281__XP_011392701.1	4.58e-202	41.2	OTHER	sp|A7UMW1|PKS1_ELSFA	6.86e-203	33.1	sp|A7UMW1|PKS1_ELSFA Non-reducing polyketide synthase 1 OS=Elsinoe fawcettii OX=40997 GN=PKS1 PE=2 SV=1	Anthracocystis_flocculosa__gene3777
Anthracocystis_flocculosa__gene3778	1	6317	OTHER	100	BGC0002212__ESK96613.1	6.74e-91	35.2	OTHER	sp|Q0D1N9|TERA_ASPTN	2.4e-154	26.8	sp|Q0D1N9|TERA_ASPTN Non-reducing polyketide synthase terA OS=Aspergillus terreus (strain NIH 2624 / FGSC A1156) OX=341663 GN=terA PE=1 SV=1	Anthracocystis_flocculosa__gene3778
Anthracocystis_flocculosa__gene5019	1	12607	OTHER	100	Fusarium_sporotrichioides__gene-FSPOR_4539	4.95e-16	27.9	macrolactone_ancestral_clade	sp|P78615|FAS2_EMEND	0	47.4	sp|P78615|FAS2_EMEND Fatty acid synthase subunit alpha OS=Emericella nidulans OX=162425 GN=fasA PE=3 SV=1	Anthracocystis_flocculosa__gene5019
Anthracocystis_flocculosa__gene6	1	11822	OUTLIER	*	None	None	None	None	sp|A0A0D1DNX1|FAS2_USTMA	0	47.4	sp|A0A0D1DNX1|FAS2_USTMA Fatty acid synthase 2 OS=Ustilago maydis (strain 521 / FGSC 9021) OX=237631 GN=fas2 PE=2 SV=1	Anthracocystis_flocculosa__gene6
Apiotrichum_porosum__gene-EHS24_002351	1	7718	OUTLIER	*	None	None	None	None	sp|P34731|FAS1_CANAX	0	49	sp|P34731|FAS1_CANAX Fatty acid synthase subunit beta OS=Candida albicans OX=5476 GN=FAS1 PE=1 SV=1	Apiotrichum_porosum__gene-EHS24_002351
Arthrobotrys_flagrans__gene-DFL_000077	1	7305	hr_pks	100	sp|A0A1W5T1T1|POXF_PENOX	1.31e-69	47	hr_pks	sp|Q86ZD9|SQTKS_PHOSC	4.47e-287	34.5	sp|Q86ZD9|SQTKS_PHOSC Squalestatin tetraketide synthase OS=Phoma sp. (strain C2932) OX=86977 GN=pks1 PE=1 SV=1	Arthrobotrys_flagrans__gene-DFL_000077
Arthrobotrys_flagrans__gene-DFL_002601	1	5208	OTHER	100	sp|G1XU04|AR283_ARTOA	0	95.2	OTHER	sp|G1XU04|AR283_ARTOA	0	95.2	sp|G1XU04|AR283_ARTOA 6-methylsalicylic acid synthase OS=Arthrobotrys oligospora (strain ATCC 24927 / CBS 115.81 / DSM 1491) OX=756982 GN=AOL_s00215g283 PE=1 SV=1	Arthrobotrys_flagrans__gene-DFL_002601
Arthrobotrys_flagrans__gene-DFL_003652	1	7030	OUTLIER	*	None	None	None	None	sp|P34229|FAS1_YARLI	0	58.9	sp|P34229|FAS1_YARLI Fatty acid synthase subunit beta OS=Yarrowia lipolytica (strain CLIB 122 / E 150) OX=284591 GN=FAS1 PE=3 SV=2	Arthrobotrys_flagrans__gene-DFL_003652
Arthrobotrys_flagrans__gene-DFL_003985	1	1580	OTHER	100	sp|I6X8D2|PKS13_MYCTU	6.48e-29	33.9	OTHER	sp|Q9D404|OXSM_MOUSE	6.71e-88	60.6	sp|Q9D404|OXSM_MOUSE 3-oxoacyl-[acyl-carrier-protein] synthase, mitochondrial OS=Mus musculus OX=10090 GN=Oxsm PE=1 SV=1	Arthrobotrys_flagrans__gene-DFL_003985
Arthrobotrys_flagrans__gene-DFL_006583	1	7781	hr_pks	100	aspergillus_calidoustus_gca_001511075__gene___ASPCAL07647	9.43e-154	34.4	hr_pks	sp|G4NEB1|NEC1_MAGO7	1.61e-117	31.4	sp|G4NEB1|NEC1_MAGO7 Highly reducing polyketide synthase NEC1 OS=Magnaporthe oryzae (strain 70-15 / ATCC MYA-4617 / FGSC 8958) OX=242507 GN=NEC1 PE=1 SV=1	Arthrobotrys_flagrans__gene-DFL_006583
Ascobolus_immersus__gene15326	1	1949	OTHER	100	BGC0001720__EJP62792.1	2.32e-14	27.2	OTHER	sp|P0AAJ0|FABD_ECOL6	5.53e-29	29.6	sp|P0AAJ0|FABD_ECOL6 Malonyl CoA-acyl carrier protein transacylase OS=Escherichia coli O6:H1 (strain CFT073 / ATCC 700928 / UPEC) OX=199310 GN=fabD PE=3 SV=2	Ascobolus_immersus__gene15326
Ascobolus_immersus__gene16623	1	1470	OTHER	100	sp|Q03133|ERYA3_SACER__1	5.52e-26	34.1	OTHER	sp|Q9NWU1|OXSM_HUMAN	1.04e-114	51.2	sp|Q9NWU1|OXSM_HUMAN 3-oxoacyl-[acyl-carrier-protein] synthase, mitochondrial OS=Homo sapiens OX=9606 GN=OXSM PE=1 SV=1	Ascobolus_immersus__gene16623
Ascobolus_immersus__gene6490	1	7231	OUTLIER	*	None	None	None	None	sp|P34229|FAS1_YARLI	0	54.2	sp|P34229|FAS1_YARLI Fatty acid synthase subunit beta OS=Yarrowia lipolytica (strain CLIB 122 / E 150) OX=284591 GN=FAS1 PE=3 SV=2	Ascobolus_immersus__gene6490
Ascobolus_immersus__gene6614	1	8238	hr_pks	100	aspergillus_albertensis__gene_12586	8.62e-134	58.4	hr_pks	sp|A0A3G1DJH7|SQTKS_PHOSM	5.86e-159	25.8	sp|A0A3G1DJH7|SQTKS_PHOSM Squalestatin tetraketide synthase OS=Phoma sp. (strain ATCC 20986 / MF5453) OX=1828523 GN=pks1 PE=1 SV=1	Ascobolus_immersus__gene6614
Ascobolus_immersus__gene7370	1	6938	OTHER	100	BGC0002253__QKG86295.1	0	65.8	OTHER	sp|A0A443HK81|VDTA1_BYSSP	0	46	sp|A0A443HK81|VDTA1_BYSSP Non-reducing polyketide synthase VdtA OS=Byssochlamys spectabilis OX=264951 GN=VdtA PE=1 SV=1	Ascobolus_immersus__gene7370
Ascodesmis_nigricans__gene-EX30DRAFT_311060	1	1220	OTHER	100	BGC0001720__EJP62792.1	1.38e-18	28.6	OTHER	sp|P71019|FABD_BACSU	1.72e-37	34.5	sp|P71019|FABD_BACSU Malonyl CoA-acyl carrier protein transacylase OS=Bacillus subtilis (strain 168) OX=224308 GN=fabD PE=3 SV=2	Ascodesmis_nigricans__gene-EX30DRAFT_311060
Ascodesmis_nigricans__gene-EX30DRAFT_354422	1	1599	OTHER	100	sp|Q9ZGI4|PIKA2_STRVZ__1	1.15e-28	29.3	OTHER	sp|O94297|OXSM_SCHPO	3.34e-104	39.9	sp|O94297|OXSM_SCHPO Putative 3-oxoacyl-[acyl-carrier-protein] synthase, mitochondrial OS=Schizosaccharomyces pombe (strain 972 / ATCC 24843) OX=284812 GN=SPBC887.13c PE=3 SV=1	Ascodesmis_nigricans__gene-EX30DRAFT_354422
Ascodesmis_nigricans__gene-EX30DRAFT_395102	1	6855	OUTLIER	*	None	None	None	None	sp|P34229|FAS1_YARLI	0	41.1	sp|P34229|FAS1_YARLI Fatty acid synthase subunit beta OS=Yarrowia lipolytica (strain CLIB 122 / E 150) OX=284591 GN=FAS1 PE=3 SV=2	Ascodesmis_nigricans__gene-EX30DRAFT_395102
Aspergillus_awamori__gene10187	1	8141	hr_pks	100	BGC0001358__OAQ83765.1	1.18e-127	56.5	hr_pks	sp|A0A6S5ZY48|G433_FUSSX	1.74e-246	30.5	sp|A0A6S5ZY48|G433_FUSSX Highly reducing polyketide synthase g433 OS=Fusarium sp. OX=29916 GN=g433 PE=2 SV=1	Aspergillus_awamori__gene10187
Aspergillus_awamori__gene10362	1	6326	OUTLIER	*	None	None	None	None	sp|P34229|FAS1_YARLI	0	59.6	sp|P34229|FAS1_YARLI Fatty acid synthase subunit beta OS=Yarrowia lipolytica (strain CLIB 122 / E 150) OX=284591 GN=FAS1 PE=3 SV=2	Aspergillus_awamori__gene10362
Aspergillus_awamori__gene10562	1	7067	hr_pks	100	aspergillus_eucalypticola_cbs_122712_gca_003184535__gene___BO83DRAFT_449894	0	89.1	hr_pks	sp|N4WHE3|PKS1_COCH4	1.73e-316	31.9	sp|N4WHE3|PKS1_COCH4 Reducing polyketide synthase PKS1 OS=Cochliobolus heterostrophus (strain C4 / ATCC 48331 / race T) OX=665024 GN=PKS1 PE=3 SV=1	Aspergillus_awamori__gene10562
Aspergillus_awamori__gene10589	1	11936	hr_pks	100	BGC0001857__QBE85649.1	7.5e-226	55.1	hr_pks	sp|A0A411L027|BUAA_ASPBU	0	38.6	sp|A0A411L027|BUAA_ASPBU Hybrid PKS-NRPS synthetase buaA OS=Aspergillus burnettii OX=2508778 GN=buaA PE=3 SV=1	Aspergillus_awamori__gene10589
Aspergillus_awamori__gene10981	1	7548	hr_pks	100	BGC0002515__KAF9708863.1	1.18e-187	51.4	hr_pks	sp|D7UQ44|SOL1_ALTSO	0	43.6	sp|D7UQ44|SOL1_ALTSO Prosolanapyrone synthase OS=Alternaria solani OX=48100 GN=sol1 PE=1 SV=1	Aspergillus_awamori__gene10981
Aspergillus_awamori__gene11057	1	8175	hr_pks	100	aspergillus_calidoustus_gca_001511075__gene___ASPCAL07647	7.84e-186	44.2	hr_pks	sp|G3XMD1|AZAB_ASPNA	0	34.9	sp|G3XMD1|AZAB_ASPNA Highly reducing polyketide synthase azaB OS=Aspergillus niger (strain ATCC 1015 / CBS 113.46 / FGSC A1144 / LSHB Ac4 / NCTC 3858a / NRRL 328 / USDA 3528.7) OX=380704 GN=azaB PE=1 SV=1	Aspergillus_awamori__gene11057
Aspergillus_awamori__gene11180	1	8302	hr_pks	100	aspergillus_calidoustus_gca_001511075__gene___ASPCAL07647	3.5e-116	54.2	hr_pks	sp|G4NEB1|NEC1_MAGO7	5.12e-181	31.2	sp|G4NEB1|NEC1_MAGO7 Highly reducing polyketide synthase NEC1 OS=Magnaporthe oryzae (strain 70-15 / ATCC MYA-4617 / FGSC 8958) OX=242507 GN=NEC1 PE=1 SV=1	Aspergillus_awamori__gene11180
Aspergillus_awamori__gene1160	1	7854	hr_pks	100	BGC0002525__BBU37368.1	5.72e-119	46.2	hr_pks	sp|S3D9F1|GLOL_GLAL2	3.22e-207	35.5	sp|S3D9F1|GLOL_GLAL2 Highly reducing polyketide synthase gloL OS=Glarea lozoyensis (strain ATCC 20868 / MF5171) OX=1116229 GN=gloL PE=1 SV=1	Aspergillus_awamori__gene1160
Aspergillus_awamori__gene12	1	13510	hr_pks	100	BGC0001122__EAU38971.1	1.92e-312	56.3	hr_pks	sp|Q0D159|AT325_ASPTN	0	35.8	sp|Q0D159|AT325_ASPTN Hybrid PKS-NRPS synthetase ATEG_00325 OS=Aspergillus terreus (strain NIH 2624 / FGSC A1156) OX=341663 GN=ATEG_00325 PE=2 SV=1	Aspergillus_awamori__gene12
Aspergillus_awamori__gene1263	1	12114	hr_pks	100	BGC0001892__ATZ45182.1	1.81e-177	63.2	hr_pks	sp|Q0D159|AT325_ASPTN	5.1e-295	26.4	sp|Q0D159|AT325_ASPTN Hybrid PKS-NRPS synthetase ATEG_00325 OS=Aspergillus terreus (strain NIH 2624 / FGSC A1156) OX=341663 GN=ATEG_00325 PE=2 SV=1	Aspergillus_awamori__gene1263
Aspergillus_awamori__gene2103	1	8576	OTHER	100	BGC0002171__EHA27898.1	0	98.6	OTHER	sp|G3XNF4|ATPKS_ASPNA	0	98.4	sp|G3XNF4|ATPKS_ASPNA PKS-NRPS hybrid synthetase ATPKS OS=Aspergillus niger (strain ATCC 1015 / CBS 113.46 / FGSC A1144 / LSHB Ac4 / NCTC 3858a / NRRL 328 / USDA 3528.7) OX=380704 GN=ATPKS PE=1 SV=1	Aspergillus_awamori__gene2103
Aspergillus_awamori__gene2322	1	11394	hr_pks	100	BGC0000992__AAV66110.2	6.35e-156	44.9	hr_pks	sp|Q5SBL6|FSDS_FUSHE	0	39	sp|Q5SBL6|FSDS_FUSHE Fusaridione A synthetase fsdS OS=Fusarium heterosporum OX=42747 GN=fsdS PE=3 SV=2	Aspergillus_awamori__gene2322
Aspergillus_awamori__gene2582	1	6677	OTHER	100	sp|A2QUI2|ALBA_ASPNC	0	99.6	OTHER	sp|G3XLL5|ALBA_ASPNA	0	91	sp|G3XLL5|ALBA_ASPNA Non-reducing polyketide synthase albA OS=Aspergillus niger (strain ATCC 1015 / CBS 113.46 / FGSC A1144 / LSHB Ac4 / NCTC 3858a / NRRL 328 / USDA 3528.7) OX=380704 GN=albA PE=3 SV=1	Aspergillus_awamori__gene2582
Aspergillus_awamori__gene2610	1	8247	hr_pks	100	BGC0001358__OAQ83765.1	2.29e-73	53.8	hr_pks	sp|S3D9F1|GLOL_GLAL2	2.91e-144	34	sp|S3D9F1|GLOL_GLAL2 Highly reducing polyketide synthase gloL OS=Glarea lozoyensis (strain ATCC 20868 / MF5171) OX=1116229 GN=gloL PE=1 SV=1	Aspergillus_awamori__gene2610
Aspergillus_awamori__gene2858	1	8248	hr_pks	100	BGC0001143__EHA28244.1	0	67.6	hr_pks	sp|G3XMD1|AZAB_ASPNA	0	80.3	sp|G3XMD1|AZAB_ASPNA Highly reducing polyketide synthase azaB OS=Aspergillus niger (strain ATCC 1015 / CBS 113.46 / FGSC A1144 / LSHB Ac4 / NCTC 3858a / NRRL 328 / USDA 3528.7) OX=380704 GN=azaB PE=1 SV=1	Aspergillus_awamori__gene2858
Aspergillus_awamori__gene2864	1	7915	OTHER	100	BGC0001143__EHA28237.1	0	98.6	OTHER	sp|A2QTE9|EPAA_ASPNC	0	97.1	sp|A2QTE9|EPAA_ASPNC Non-reducing polyketide synthase epaA OS=Aspergillus niger (strain CBS 513.88 / FGSC A1513) OX=425011 GN=epaA PE=3 SV=1	Aspergillus_awamori__gene2864
Aspergillus_awamori__gene2907	1	8212	hr_pks	100	BGC0002502__AEA35016.1	1.11e-108	33	hr_pks	sp|A0A6S5ZY48|G433_FUSSX	5.21e-229	28.5	sp|A0A6S5ZY48|G433_FUSSX Highly reducing polyketide synthase g433 OS=Fusarium sp. OX=29916 GN=g433 PE=2 SV=1	Aspergillus_awamori__gene2907
Aspergillus_awamori__gene3135	1	11850	hr_pks	100	BGC0001124__EHA19289.1	0	99.2	hr_pks	sp|A5ABG0|PYNA_ASPNC	0	98.3	sp|A5ABG0|PYNA_ASPNC Hybrid PKS-NRPS synthetase pynA OS=Aspergillus niger (strain CBS 513.88 / FGSC A1513) OX=425011 GN=pynA PE=1 SV=1	Aspergillus_awamori__gene3135
Aspergillus_awamori__gene3394	1	9305	hr_pks	100	BGC0001035__EPE34340.1	8.68e-86	29.8	hr_pks	sp|S3D9F1|GLOL_GLAL2	0	34.9	sp|S3D9F1|GLOL_GLAL2 Highly reducing polyketide synthase gloL OS=Glarea lozoyensis (strain ATCC 20868 / MF5171) OX=1116229 GN=gloL PE=1 SV=1	Aspergillus_awamori__gene3394
Aspergillus_awamori__gene3441	1	8656	hr_pks	100	aspergillus_calidoustus_gca_001511075__gene___ASPCAL07647	8.95e-102	36.1	hr_pks	sp|Q0CF75|AZPB1_ASPTN	2.93e-275	32.3	sp|Q0CF75|AZPB1_ASPTN Highly reducing polyketide synthase ATEG_07659 OS=Aspergillus terreus (strain NIH 2624 / FGSC A1156) OX=341663 GN=ATEG_07659 PE=1 SV=1	Aspergillus_awamori__gene3441
Aspergillus_awamori__gene3472	1	7466	hr_pks	100	aspergillus_aculeatinus_cbs_121060_gca_003184765__gene___BO66DRAFT_460892	3.61e-246	59.7	hr_pks	sp|A0A0A2JW91|CNSI_PENEN	0	38.6	sp|A0A0A2JW91|CNSI_PENEN Highly reducing polyketide synthase cnsI OS=Penicillium expansum OX=27334 GN=cnsI PE=1 SV=1	Aspergillus_awamori__gene3472
Aspergillus_awamori__gene3571	1	7711	hr_pks	100	BGC0002525__BBU37368.1	1.84e-210	52	hr_pks	sp|A0A6S5ZY48|G433_FUSSX	0	44.1	sp|A0A6S5ZY48|G433_FUSSX Highly reducing polyketide synthase g433 OS=Fusarium sp. OX=29916 GN=g433 PE=2 SV=1	Aspergillus_awamori__gene3571
Aspergillus_awamori__gene3601	1	7568	hr_pks	100	Chlorociboria_aeruginascens__gene-B7494_g1069	1.76e-160	45.7	hr_pks	sp|A0A0D2YG10|FUB1_FUSO4	0	32.7	sp|A0A0D2YG10|FUB1_FUSO4 Reducing polyketide synthase FUB1 OS=Fusarium oxysporum f. sp. lycopersici (strain 4287 / CBS 123668 / FGSC 9935 / NRRL 34936) OX=426428 GN=FUB1 PE=1 SV=2	Aspergillus_awamori__gene3601
Aspergillus_awamori__gene3603	1	8115	hr_pks	100	sp|Q0CS88|TAZB_ASPTN	1.67e-121	46.9	hr_pks	sp|A0A1R3RGK0|OTAA_ASPC5	1.35e-166	28.3	sp|A0A1R3RGK0|OTAA_ASPC5 Highly reducing polyketide synthase otaA OS=Aspergillus carbonarius (strain ITEM 5010) OX=602072 GN=otaA PE=2 SV=1	Aspergillus_awamori__gene3603
Aspergillus_awamori__gene3699	1	5382	OTHER	100	BGC0000156__AEN83889.1	0	99.2	OTHER	sp|A2QX22|ADAA_ASPNC	0	98.7	sp|A2QX22|ADAA_ASPNC Non-reducing polyketide synthase adaA OS=Aspergillus niger (strain CBS 513.88 / FGSC A1513) OX=425011 GN=adaA PE=1 SV=1	Aspergillus_awamori__gene3699
Aspergillus_awamori__gene3786	1	9300	hr_pks	100	BGC0001724__EPS29069.1	5.45e-262	51.9	hr_pks	sp|I1S166|FSL1_GIBZE	0	37.1	sp|I1S166|FSL1_GIBZE Fusarielin synthase FSL1 OS=Gibberella zeae (strain ATCC MYA-4620 / CBS 123657 / FGSC 9075 / NRRL 31084 / PH-1) OX=229533 GN=FSL1 PE=2 SV=1	Aspergillus_awamori__gene3786
Aspergillus_awamori__gene3888	1	8612	hr_pks	100	sp|P9WEQ0|OLCA_PENCN	0	58	hr_pks	sp|A0A1V6NYI6|VERA_PENPO	0	45.4	sp|A0A1V6NYI6|VERA_PENPO Highly reducing polyketide synthase verA OS=Penicillium polonicum OX=60169 GN=verA PE=3 SV=1	Aspergillus_awamori__gene3888
Aspergillus_awamori__gene4179	1	6234	OUTLIER	*	None	None	None	None	sp|A0A1U8QK63|PKIC_EMENI	0	51.6	sp|A0A1U8QK63|PKIC_EMENI Fatty acid synthase beta subunit pkiC OS=Emericella nidulans (strain FGSC A4 / ATCC 38163 / CBS 112.46 / NRRL 194 / M139) OX=227321 GN=pkiC PE=1 SV=1	Aspergillus_awamori__gene4179
Aspergillus_awamori__gene4183	1	7770	OTHER	100	sp|Q5B7U4|PKIA_EMENI	0	61.3	OTHER	sp|Q5B7U4|PKIA_EMENI	0	54.3	sp|Q5B7U4|PKIA_EMENI Non-reducing polyketide synthase pkiA OS=Emericella nidulans (strain FGSC A4 / ATCC 38163 / CBS 112.46 / NRRL 194 / M139) OX=227321 GN=pkiA PE=1 SV=1	Aspergillus_awamori__gene4183
Aspergillus_awamori__gene4239	1	10026	hr_pks	99.9	BGC0002525__BBU37368.1	1.26e-178	47.2	hr_pks	sp|S3D9F1|GLOL_GLAL2	0	41.6	sp|S3D9F1|GLOL_GLAL2 Highly reducing polyketide synthase gloL OS=Glarea lozoyensis (strain ATCC 20868 / MF5171) OX=1116229 GN=gloL PE=1 SV=1	Aspergillus_awamori__gene4239
Aspergillus_awamori__gene4242	1	7466	hr_pks	100	aspergillus_aculeatinus_cbs_121060_gca_003184765__gene___BO66DRAFT_460892	1.47e-226	54.4	hr_pks	sp|A0A0A2JW91|CNSI_PENEN	0	45.3	sp|A0A0A2JW91|CNSI_PENEN Highly reducing polyketide synthase cnsI OS=Penicillium expansum OX=27334 GN=cnsI PE=1 SV=1	Aspergillus_awamori__gene4242
Aspergillus_awamori__gene4962	1	11959	hr_pks	100	BGC0002210__FAA01291.1	0	71.7	hr_pks	sp|A0A2V5GX43|PYVA_ASPV1	0	59.7	sp|A0A2V5GX43|PYVA_ASPV1 Hybrid PKS-NRPS synthetase pyvA OS=Aspergillus violaceofuscus (strain CBS 115571) OX=1450538 GN=pyvA PE=3 SV=1	Aspergillus_awamori__gene4962
Aspergillus_awamori__gene5709	1	12145	hr_pks	100	BGC0002197__QBK15049.1	0	69.5	hr_pks	sp|A0A481WNP4|TRAA_PENCR	0	66.3	sp|A0A481WNP4|TRAA_PENCR Hybrid PKS-NRPS synthetase traA OS=Penicillium crustosum OX=36656 GN=traA PE=3 SV=1	Aspergillus_awamori__gene5709
Aspergillus_awamori__gene6382	1	6195	OUTLIER	*	None	None	None	None	sp|Q2TXG3|ORYB_ASPOR	0	42.8	sp|Q2TXG3|ORYB_ASPOR Fatty acid synthase subunit beta OS=Aspergillus oryzae (strain ATCC 42149 / RIB 40) OX=510516 GN=oryfasB PE=3 SV=1	Aspergillus_awamori__gene6382
Aspergillus_awamori__gene6486	1	8494	hr_pks	100	aspergillus_calidoustus_gca_001511075__gene___ASPCAL07647	8.74e-201	42.6	hr_pks	sp|G4NEB1|NEC1_MAGO7	1.37e-231	27.8	sp|G4NEB1|NEC1_MAGO7 Highly reducing polyketide synthase NEC1 OS=Magnaporthe oryzae (strain 70-15 / ATCC MYA-4617 / FGSC 8958) OX=242507 GN=NEC1 PE=1 SV=1	Aspergillus_awamori__gene6486
Aspergillus_awamori__gene6850	1	8132	hr_pks	99.9	sp|P9WEQ0|OLCA_PENCN	0	59	hr_pks	sp|A0A1V6NYI6|VERA_PENPO	0	45.9	sp|A0A1V6NYI6|VERA_PENPO Highly reducing polyketide synthase verA OS=Penicillium polonicum OX=60169 GN=verA PE=3 SV=1	Aspergillus_awamori__gene6850
Aspergillus_awamori__gene7188	1	1458	OTHER	100	BGC0002212__ESK96613.1	7.54e-16	26.9	OTHER	sp|P71019|FABD_BACSU	1.03e-38	35.2	sp|P71019|FABD_BACSU Malonyl CoA-acyl carrier protein transacylase OS=Bacillus subtilis (strain 168) OX=224308 GN=fabD PE=3 SV=2	Aspergillus_awamori__gene7188
Aspergillus_awamori__gene7243	1	15463	hr_pks	100	BGC0002525__BBU37368.1	6.51e-115	37.5	hr_pks	sp|Q92197|CHSC_ASPFU	6.76e-259	75.9	sp|Q92197|CHSC_ASPFU Chitin synthase C OS=Neosartorya fumigata (strain ATCC MYA-4609 / Af293 / CBS 101355 / FGSC A1100) OX=330879 GN=chsC PE=3 SV=2	Aspergillus_awamori__gene7243
Aspergillus_awamori__gene7306	1	6664	OTHER	100	BGC0001578__EED21099.1	2.28e-266	64.2	OTHER	sp|A0A142C799|PHNA_PENHR	0	42.7	sp|A0A142C799|PHNA_PENHR Non-reducing polyketide synthase phnA OS=Penicillium herquei OX=69774 GN=phnA PE=1 SV=1	Aspergillus_awamori__gene7306
Aspergillus_awamori__gene7329	1	8478	hr_pks	100	aspergillus_vadensis_cbs_113365_gca_003184925__gene___BO88DRAFT_454246	8.38e-237	61.8	hr_pks	sp|G4NEB1|NEC1_MAGO7	4.8e-132	25	sp|G4NEB1|NEC1_MAGO7 Highly reducing polyketide synthase NEC1 OS=Magnaporthe oryzae (strain 70-15 / ATCC MYA-4617 / FGSC 8958) OX=242507 GN=NEC1 PE=1 SV=1	Aspergillus_awamori__gene7329
Aspergillus_awamori__gene7662	1	5364	OTHER	100	BGC0000170__EHA22196.1	0	99	OTHER	sp|G3Y419|YANA_ASPNA	0	98.4	sp|G3Y419|YANA_ASPNA 6-methylsalicylic acid synthase OS=Aspergillus niger (strain ATCC 1015 / CBS 113.46 / FGSC A1144 / LSHB Ac4 / NCTC 3858a / NRRL 328 / USDA 3528.7) OX=380704 GN=yanA PE=1 SV=1	Aspergillus_awamori__gene7662
Aspergillus_awamori__gene7706	1	9962	OUTLIER	*	None	None	None	None	sp|Q5AV07|ATNM_EMENI	0	41.5	sp|Q5AV07|ATNM_EMENI Fatty acid synthase beta subunit aflB OS=Emericella nidulans (strain FGSC A4 / ATCC 38163 / CBS 112.46 / NRRL 194 / M139) OX=227321 GN=atnM PE=2 SV=1	Aspergillus_awamori__gene7706
Aspergillus_awamori__gene824	1	4023	OTHER	100	BGC0001244__AIW00670.1	5.98e-13	37.1	OTHER	sp|Q8L3X9|KASM_ARATH	1.44e-38	34.2	sp|Q8L3X9|KASM_ARATH 3-oxoacyl-[acyl-carrier-protein] synthase, mitochondrial OS=Arabidopsis thaliana OX=3702 GN=KAS PE=1 SV=1	Aspergillus_awamori__gene824
Aspergillus_awamori__gene8861	1	6465	OTHER	100	BGC0002255__AMJ52084.1	1.08e-314	54.8	OTHER	sp|Q5B8A0|PKFA_EMENI	0	40	sp|Q5B8A0|PKFA_EMENI Non-reducing polyketide synthase pkfA OS=Emericella nidulans (strain FGSC A4 / ATCC 38163 / CBS 112.46 / NRRL 194 / M139) OX=227321 GN=pkfA PE=1 SV=1	Aspergillus_awamori__gene8861
Aspergillus_awamori__gene8977	1	10278	OTHER	100	BGC0002734__EAU35431.1	1.86e-243	47.8	OTHER	sp|Q0CRQ5|5MOAS_ASPTN	0	38.7	sp|Q0CRQ5|5MOAS_ASPTN 5-methylorsellinic acid synthase OS=Aspergillus terreus (strain NIH 2624 / FGSC A1156) OX=341663 GN=ATEG_03629 PE=1 SV=1	Aspergillus_awamori__gene8977
Aspergillus_awamori__gene9423	1	7625	hr_pks	100	BGC0002729__EAA36364.1	1.38e-116	60	hr_pks	sp|Q7SHI6|SRDA_NEUCR	0	31.4	sp|Q7SHI6|SRDA_NEUCR Highly reducing polyketide synthase srdA OS=Neurospora crassa (strain ATCC 24698 / 74-OR23-1A / CBS 708.71 / DSM 1257 / FGSC 987) OX=367110 GN=srdA PE=2 SV=1	Aspergillus_awamori__gene9423
Aspergillus_awamori__gene9832	1	7986	hr_pks	100	BGC0000062__AAD43562.2	0	61.7	hr_pks	sp|S3D9F1|GLOL_GLAL2	0	54.7	sp|S3D9F1|GLOL_GLAL2 Highly reducing polyketide synthase gloL OS=Glarea lozoyensis (strain ATCC 20868 / MF5171) OX=1116229 GN=gloL PE=1 SV=1	Aspergillus_awamori__gene9832
Aspergillus_awamori__gene99	1	3882	hr_pks	100	BGC0002525__BBU37368.1	3.02e-138	33.7	hr_pks	sp|A0A6S5ZY48|G433_FUSSX	6.78e-214	35.5	sp|A0A6S5ZY48|G433_FUSSX Highly reducing polyketide synthase g433 OS=Fusarium sp. OX=29916 GN=g433 PE=2 SV=1	Aspergillus_awamori__gene99
Aspergillus_burnettii__gene-ETB97_000423	1	9051	hr_pks	100	BGC0002525__BBU37368.1	1.35e-160	55.6	hr_pks	sp|S3D9F1|GLOL_GLAL2	0	45	sp|S3D9F1|GLOL_GLAL2 Highly reducing polyketide synthase gloL OS=Glarea lozoyensis (strain ATCC 20868 / MF5171) OX=1116229 GN=gloL PE=1 SV=1	Aspergillus_burnettii__gene-ETB97_000423
Aspergillus_burnettii__gene-ETB97_000455	1	8270	hr_pks	100	sp|A0A1W5T1T1|POXF_PENOX	4.3e-159	38.9	hr_pks	sp|Q86ZD9|SQTKS_PHOSC	0	40.3	sp|Q86ZD9|SQTKS_PHOSC Squalestatin tetraketide synthase OS=Phoma sp. (strain C2932) OX=86977 GN=pks1 PE=1 SV=1	Aspergillus_burnettii__gene-ETB97_000455
Aspergillus_burnettii__gene-ETB97_000485	1	7278	hr_pks	100	BGC0002238__BAE61265.1	0	83.4	hr_pks	sp|Q2UB00|PPSB_ASPOR	0	79.1	sp|Q2UB00|PPSB_ASPOR Reducing polyketide synthase ppsB OS=Aspergillus oryzae (strain ATCC 42149 / RIB 40) OX=510516 GN=ppsB PE=3 SV=1	Aspergillus_burnettii__gene-ETB97_000485
Aspergillus_burnettii__gene-ETB97_000769	1	7129	OTHER	100	BGC0001446__EED57518.1	3.1e-317	72.9	OTHER	sp|B8MYS6|PKS27_ASPFN	0	80.5	sp|B8MYS6|PKS27_ASPFN Non-reducing polyketide synthase pks27 OS=Aspergillus flavus (strain ATCC 200026 / FGSC A1120 / IAM 13836 / NRRL 3357 / JCM 12722 / SRRC 167) OX=332952 GN=pks27 PE=1 SV=1	Aspergillus_burnettii__gene-ETB97_000769
Aspergillus_burnettii__gene-ETB97_001417	1	5450	OTHER	100	BGC0000160__EAU32819.1	0	64.4	OTHER	sp|Q0CJ59|ATX_ASPTN	0	60	sp|Q0CJ59|ATX_ASPTN 6-methylsalicylic acid synthase OS=Aspergillus terreus (strain NIH 2624 / FGSC A1156) OX=341663 GN=atX PE=1 SV=1	Aspergillus_burnettii__gene-ETB97_001417
Aspergillus_burnettii__gene-ETB97_001427	1	7503	hr_pks	100	BGC0001141__AIA58899.1	3.93e-235	43.1	hr_pks	sp|A0A068ABB7|BREF7_EUPBR	0	39.9	sp|A0A068ABB7|BREF7_EUPBR Highly reducing polyketide synthase OS=Eupenicillium brefeldianum OX=1131482 GN=Bref-PKS PE=1 SV=1	Aspergillus_burnettii__gene-ETB97_001427
Aspergillus_burnettii__gene-ETB97_001496	1	2317	OTHER	100	BGC0002604__BBG67008.1	2.5e-53	50	OTHER	sp|I1RL11|DPFGA_GIBZE	1.2e-49	55.5	sp|I1RL11|DPFGA_GIBZE Non-reducing polyketide synthase dpfgA OS=Gibberella zeae (strain ATCC MYA-4620 / CBS 123657 / FGSC 9075 / NRRL 31084 / PH-1) OX=229533 GN=dpfgA PE=1 SV=1	Aspergillus_burnettii__gene-ETB97_001496
Aspergillus_burnettii__gene-ETB97_001902	1	6332	OUTLIER	*	None	None	None	None	sp|P34229|FAS1_YARLI	0	59.6	sp|P34229|FAS1_YARLI Fatty acid synthase subunit beta OS=Yarrowia lipolytica (strain CLIB 122 / E 150) OX=284591 GN=FAS1 PE=3 SV=2	Aspergillus_burnettii__gene-ETB97_001902
Aspergillus_burnettii__gene-ETB97_002151	1	7988	hr_pks	99.9	BGC0002525__BBU37368.1	4.06e-71	27.9	hr_pks	sp|A0A6S5ZY48|G433_FUSSX	8.29e-294	29.4	sp|A0A6S5ZY48|G433_FUSSX Highly reducing polyketide synthase g433 OS=Fusarium sp. OX=29916 GN=g433 PE=2 SV=1	Aspergillus_burnettii__gene-ETB97_002151
Aspergillus_burnettii__gene-ETB97_002212	1	8080	hr_pks	100	aspergillus_albertensis__gene_12586	1.81e-183	99	hr_pks	sp|Q86ZD9|SQTKS_PHOSC	0	39.9	sp|Q86ZD9|SQTKS_PHOSC Squalestatin tetraketide synthase OS=Phoma sp. (strain C2932) OX=86977 GN=pks1 PE=1 SV=1	Aspergillus_burnettii__gene-ETB97_002212
Aspergillus_burnettii__gene-ETB97_002453	1	7487	hr_pks	99.7	BGC0001141__AIA58899.1	2.38e-130	49.3	hr_pks	sp|A0A068ABB7|BREF7_EUPBR	0	41.3	sp|A0A068ABB7|BREF7_EUPBR Highly reducing polyketide synthase OS=Eupenicillium brefeldianum OX=1131482 GN=Bref-PKS PE=1 SV=1	Aspergillus_burnettii__gene-ETB97_002453
Aspergillus_burnettii__gene-ETB97_002566	1	1661	OTHER	100	BGC0001405__EAQ86392.1	1.17e-102	64.1	OTHER	sp|A0A0K0MCJ4|CAZM_CHAGB	1.25e-95	64.1	sp|A0A0K0MCJ4|CAZM_CHAGB Iterative polyketide synthase CazM OS=Chaetomium globosum (strain ATCC 6205 / CBS 148.51 / DSM 1962 / NBRC 6347 / NRRL 1970) OX=306901 GN=cazM PE=1 SV=1	Aspergillus_burnettii__gene-ETB97_002566
Aspergillus_burnettii__gene-ETB97_002786	1	420	hr_pks	99.3	BGC0001358__OAQ83760.1	9.25e-21	45.2	hr_pks	sp|A0A179H2I8|LCSB_PURLI	3.59e-19	45.9	sp|A0A179H2I8|LCSB_PURLI Highly reducing polyketide synthase lcsB OS=Purpureocillium lilacinum OX=33203 GN=lcsB PE=2 SV=1	Aspergillus_burnettii__gene-ETB97_002786
Aspergillus_burnettii__gene-ETB97_002787	1	618	hr_pks	100	BGC0001358__OAQ83760.1	4.22e-17	33.5	hr_pks	sp|A0A179H2I8|LCSB_PURLI	1.5e-14	33.5	sp|A0A179H2I8|LCSB_PURLI Highly reducing polyketide synthase lcsB OS=Purpureocillium lilacinum OX=33203 GN=lcsB PE=2 SV=1	Aspergillus_burnettii__gene-ETB97_002787
Aspergillus_burnettii__gene-ETB97_002788	1	2058	hr_pks	96.7	BGC0002525__BBU37368.1	3.31e-14	44.2	hr_pks	sp|A0A455M2Y3|NTNH_NECSZ	4e-47	35.2	sp|A0A455M2Y3|NTNH_NECSZ Highly reducing polyketide synthase ntnH OS=Nectria sp. OX=1755444 GN=ntnH PE=2 SV=1	Aspergillus_burnettii__gene-ETB97_002788
Aspergillus_burnettii__gene-ETB97_003939	1	8104	hr_pks	100	aspergillus_turcosus_gca_002234965__gene___CDV55_03573	2.51e-174	62.2	hr_pks	sp|N4WHE3|PKS1_COCH4	0	32.9	sp|N4WHE3|PKS1_COCH4 Reducing polyketide synthase PKS1 OS=Cochliobolus heterostrophus (strain C4 / ATCC 48331 / race T) OX=665024 GN=PKS1 PE=3 SV=1	Aspergillus_burnettii__gene-ETB97_003939
Aspergillus_burnettii__gene-ETB97_004053	1	6663	OTHER	100	BGC0002175__BAE61567.1	0	94.1	OTHER	sp|A0A1L9UCG2|ALBA_ASPBC	0	77.5	sp|A0A1L9UCG2|ALBA_ASPBC Non-reducing polyketide synthase albA OS=Aspergillus brasiliensis (strain CBS 101740 / IMI 381727 / IBT 21946) OX=767769 GN=albA PE=3 SV=1	Aspergillus_burnettii__gene-ETB97_004053
Aspergillus_burnettii__gene-ETB97_004364	1	6978	hr_pks	100	marssonina_brunnea_f_sp_multigermtubi_mb_m1_gca_000298775__gene___MBM_09202	1.86e-123	40.5	hr_pks	sp|N4WHE3|PKS1_COCH4	1.15e-247	29.9	sp|N4WHE3|PKS1_COCH4 Reducing polyketide synthase PKS1 OS=Cochliobolus heterostrophus (strain C4 / ATCC 48331 / race T) OX=665024 GN=PKS1 PE=3 SV=1	Aspergillus_burnettii__gene-ETB97_004364
Aspergillus_burnettii__gene-ETB97_004590	1	7989	hr_pks	100	BGC0002139__KAF5858310.1	0	87.1	hr_pks	sp|I1S166|FSL1_GIBZE	0	46.6	sp|I1S166|FSL1_GIBZE Fusarielin synthase FSL1 OS=Gibberella zeae (strain ATCC MYA-4620 / CBS 123657 / FGSC 9075 / NRRL 31084 / PH-1) OX=229533 GN=FSL1 PE=2 SV=1	Aspergillus_burnettii__gene-ETB97_004590
Aspergillus_burnettii__gene-ETB97_004928	1	4865	OTHER	100	BGC0001266__ADM79459.1	2.73e-73	35.9	OTHER	sp|E9FCP4|DTXS1_METRA	3.34e-255	39.9	sp|E9FCP4|DTXS1_METRA Nonribosomal peptide synthetase dtxS1 OS=Metarhizium robertsii (strain ARSEF 23 / ATCC MYA-3075) OX=655844 GN=dtxS1 PE=1 SV=2	Aspergillus_burnettii__gene-ETB97_004928
Aspergillus_burnettii__gene-ETB97_005251	1	1159	hr_pks	99.8	sp|A0A0G0AID6|THNA_TRIHA	1.85e-79	63.3	hr_pks	sp|A0A0G0AID6|THNA_TRIHA	8.57e-78	62.8	sp|A0A0G0AID6|THNA_TRIHA Hybrid PKS-NRPS synthetase thnA OS=Trichoderma harzianum OX=5544 GN=thnA PE=1 SV=1	Aspergillus_burnettii__gene-ETB97_005251
Aspergillus_burnettii__gene-ETB97_005348	1	8413	OTHER	100	sp|Q5B7U4|PKIA_EMENI	0	63.7	OTHER	sp|Q5B7U4|PKIA_EMENI	0	56.8	sp|Q5B7U4|PKIA_EMENI Non-reducing polyketide synthase pkiA OS=Emericella nidulans (strain FGSC A4 / ATCC 38163 / CBS 112.46 / NRRL 194 / M139) OX=227321 GN=pkiA PE=1 SV=1	Aspergillus_burnettii__gene-ETB97_005348
Aspergillus_burnettii__gene-ETB97_005477	1	6656	OTHER	100	sp|P9WET9|PKS24_BYSSP	1.75e-187	55.4	OTHER	sp|G3XLL5|ALBA_ASPNA	3.49e-239	36.6	sp|G3XLL5|ALBA_ASPNA Non-reducing polyketide synthase albA OS=Aspergillus niger (strain ATCC 1015 / CBS 113.46 / FGSC A1144 / LSHB Ac4 / NCTC 3858a / NRRL 328 / USDA 3528.7) OX=380704 GN=albA PE=3 SV=1	Aspergillus_burnettii__gene-ETB97_005477
Aspergillus_burnettii__gene-ETB97_005724	1	7694	hr_pks	100	amorphotheca_resinae_atcc_22711_gca_003019875__gene___M430DRAFT_109173	3.68e-202	42.9	hr_pks	sp|A0A3G1DJH7|SQTKS_PHOSM	0	34.7	sp|A0A3G1DJH7|SQTKS_PHOSM Squalestatin tetraketide synthase OS=Phoma sp. (strain ATCC 20986 / MF5453) OX=1828523 GN=pks1 PE=1 SV=1	Aspergillus_burnettii__gene-ETB97_005724
Aspergillus_burnettii__gene-ETB97_005943	1	6975	hr_pks	100	sp|Q4WKW9|FGNA_ASPFU	7.14e-181	40	hr_pks	sp|Q4WKW9|FGNA_ASPFU	0	61.2	sp|Q4WKW9|FGNA_ASPFU Fumigermin synthase OS=Neosartorya fumigata (strain ATCC MYA-4609 / Af293 / CBS 101355 / FGSC A1100) OX=330879 GN=fgnA PE=1 SV=1	Aspergillus_burnettii__gene-ETB97_005943
Aspergillus_burnettii__gene-ETB97_006245	1	7810	OTHER	100	BGC0002209__KIA75596.1	3.52e-240	45.8	OTHER	sp|Q0CRQ5|5MOAS_ASPTN	0	36.1	sp|Q0CRQ5|5MOAS_ASPTN 5-methylorsellinic acid synthase OS=Aspergillus terreus (strain NIH 2624 / FGSC A1156) OX=341663 GN=ATEG_03629 PE=1 SV=1	Aspergillus_burnettii__gene-ETB97_006245
Aspergillus_burnettii__gene-ETB97_006264	1	8045	hr_pks	100	aspergillus_cristatus_gca_001717485__gene___SI65_09735	2.38e-211	50.7	hr_pks	sp|Q86ZD9|SQTKS_PHOSC	0	34	sp|Q86ZD9|SQTKS_PHOSC Squalestatin tetraketide synthase OS=Phoma sp. (strain C2932) OX=86977 GN=pks1 PE=1 SV=1	Aspergillus_burnettii__gene-ETB97_006264
Aspergillus_burnettii__gene-ETB97_006286	1	5497	OTHER	100	BGC0001304__EED53479.1	0	80.4	OTHER	sp|B8N8R0|AFVB_ASPFN	0	73.7	sp|B8N8R0|AFVB_ASPFN Non-reducing polyketide synthase afvB OS=Aspergillus flavus (strain ATCC 200026 / FGSC A1120 / IAM 13836 / NRRL 3357 / JCM 12722 / SRRC 167) OX=332952 GN=afvB PE=2 SV=1	Aspergillus_burnettii__gene-ETB97_006286
Aspergillus_burnettii__gene-ETB97_006440	1	8506	hr_pks	100	BGC0001565__ATQ39432.1	2.74e-154	68.7	hr_pks	sp|A0A179H2I8|LCSB_PURLI	0	44	sp|A0A179H2I8|LCSB_PURLI Highly reducing polyketide synthase lcsB OS=Purpureocillium lilacinum OX=33203 GN=lcsB PE=2 SV=1	Aspergillus_burnettii__gene-ETB97_006440
Aspergillus_burnettii__gene-ETB97_006459	1	8071	hr_pks	100	aspergillus_calidoustus_gca_001511075__gene___ASPCAL07647	6.47e-138	45.4	hr_pks	sp|A0A0D2YG10|FUB1_FUSO4	4.45e-189	32.7	sp|A0A0D2YG10|FUB1_FUSO4 Reducing polyketide synthase FUB1 OS=Fusarium oxysporum f. sp. lycopersici (strain 4287 / CBS 123668 / FGSC 9935 / NRRL 34936) OX=426428 GN=FUB1 PE=1 SV=2	Aspergillus_burnettii__gene-ETB97_006459
Aspergillus_burnettii__gene-ETB97_006635	1	3812	OTHER	100	sp|B8NYX0|FLUP_ASPFN	1.49e-284	74.5	OTHER	sp|Q0CJ59|ATX_ASPTN	0	54.1	sp|Q0CJ59|ATX_ASPTN 6-methylsalicylic acid synthase OS=Aspergillus terreus (strain NIH 2624 / FGSC A1156) OX=341663 GN=atX PE=1 SV=1	Aspergillus_burnettii__gene-ETB97_006635
Aspergillus_burnettii__gene-ETB97_006755	1	8340	hr_pks	100	BGC0000062__AAD43562.2	1.78e-110	34.4	hr_pks	sp|S3D9F1|GLOL_GLAL2	3.33e-285	29.2	sp|S3D9F1|GLOL_GLAL2 Highly reducing polyketide synthase gloL OS=Glarea lozoyensis (strain ATCC 20868 / MF5171) OX=1116229 GN=gloL PE=1 SV=1	Aspergillus_burnettii__gene-ETB97_006755
Aspergillus_burnettii__gene-ETB97_007071	1	1200	OTHER	100	BGC0002212__ESK96613.1	6.87e-14	25.4	OTHER	sp|P71019|FABD_BACSU	5.61e-38	34.9	sp|P71019|FABD_BACSU Malonyl CoA-acyl carrier protein transacylase OS=Bacillus subtilis (strain 168) OX=224308 GN=fabD PE=3 SV=2	Aspergillus_burnettii__gene-ETB97_007071
Aspergillus_burnettii__gene-ETB97_007157	1	6643	OUTLIER	*	None	None	None	None	sp|P34731|FAS1_CANAX	0	40.6	sp|P34731|FAS1_CANAX Fatty acid synthase subunit beta OS=Candida albicans OX=5476 GN=FAS1 PE=1 SV=1	Aspergillus_burnettii__gene-ETB97_007157
Aspergillus_burnettii__gene-ETB97_007284	1	7423	hr_pks	100	aspergillus_bombycis_gca_001792695__gene___ABOM_001247	4.16e-250	75.6	hr_pks	sp|B3FWU0|RDC5_METCM	1.7e-209	28.4	sp|B3FWU0|RDC5_METCM Reducing polyketide synthase rdc5 OS=Metacordyceps chlamydosporia OX=280754 GN=rdc5 PE=1 SV=1	Aspergillus_burnettii__gene-ETB97_007284
Aspergillus_burnettii__gene-ETB97_007730	1	2149	OTHER	100	BGC0001244__AIW00670.1	3.43e-11	35.3	OTHER	sp|Q9D404|OXSM_MOUSE	6.17e-63	33.6	sp|Q9D404|OXSM_MOUSE 3-oxoacyl-[acyl-carrier-protein] synthase, mitochondrial OS=Mus musculus OX=10090 GN=Oxsm PE=1 SV=1	Aspergillus_burnettii__gene-ETB97_007730
Aspergillus_burnettii__gene-ETB97_008084	1	8372	hr_pks	100	coniochaeta_ligniaria_nrrl_30616_gca_001879275__gene___CONLIGDRAFT_63350	1.93e-104	31.6	hr_pks	sp|Q5KTM9|ALT5_ALTSO	4.11e-240	32.2	sp|Q5KTM9|ALT5_ALTSO Highly reducing polyketide synthase alt5 OS=Alternaria solani OX=48100 GN=alt5 PE=1 SV=1	Aspergillus_burnettii__gene-ETB97_008084
Aspergillus_burnettii__gene-ETB97_008273	1	6793	hr_pks	99.9	BGC0001141__AIA58899.1	2.1e-120	45.8	hr_pks	sp|A0A068ABB7|BREF7_EUPBR	0	34.8	sp|A0A068ABB7|BREF7_EUPBR Highly reducing polyketide synthase OS=Eupenicillium brefeldianum OX=1131482 GN=Bref-PKS PE=1 SV=1	Aspergillus_burnettii__gene-ETB97_008273
Aspergillus_burnettii__gene-ETB97_008275	1	8498	hr_pks	100	BGC0002515__KAF9708863.1	1.13e-259	55.6	hr_pks	sp|D7UQ44|SOL1_ALTSO	0	50.6	sp|D7UQ44|SOL1_ALTSO Prosolanapyrone synthase OS=Alternaria solani OX=48100 GN=sol1 PE=1 SV=1	Aspergillus_burnettii__gene-ETB97_008275
Aspergillus_burnettii__gene-ETB97_008293	1	7556	OTHER	100	BGC0002537__BCD52390.1	2.45e-195	42	OTHER	sp|A0A097ZPE0|ANDM_EMEVA	1.62e-313	38.6	sp|A0A097ZPE0|ANDM_EMEVA Non-reducing polyketide synthase andM OS=Emericella variicolor OX=1549217 GN=andM PE=1 SV=1	Aspergillus_burnettii__gene-ETB97_008293
Aspergillus_burnettii__gene-ETB97_008323	1	12514	hr_pks	100	BGC0001857__QBE85649.1	0	72.9	hr_pks	sp|A0A411L027|BUAA_ASPBU	0	98.4	sp|A0A411L027|BUAA_ASPBU Hybrid PKS-NRPS synthetase buaA OS=Aspergillus burnettii OX=2508778 GN=buaA PE=3 SV=1	Aspergillus_burnettii__gene-ETB97_008323
Aspergillus_burnettii__gene-ETB97_008510	1	7875	OTHER	100	sp|Q5BG07|PKDA_EMENI	0	75.6	OTHER	sp|Q5BG07|PKDA_EMENI	0	66.7	sp|Q5BG07|PKDA_EMENI Non-reducing polyketide synthase pkdA OS=Emericella nidulans (strain FGSC A4 / ATCC 38163 / CBS 112.46 / NRRL 194 / M139) OX=227321 GN=pkdA PE=1 SV=1	Aspergillus_burnettii__gene-ETB97_008510
Aspergillus_burnettii__gene-ETB97_008834	1	5179	OTHER	100	BGC0000070__ADI24953.1	0	81.2	OTHER	sp|D7PI15|GSFA_PENAE	0	78.8	sp|D7PI15|GSFA_PENAE Non-reducing polyketide synthase gsfA OS=Penicillium aethiopicum OX=36650 GN=gsfA PE=1 SV=1	Aspergillus_burnettii__gene-ETB97_008834
Aspergillus_burnettii__gene-ETB97_008899	1	1014	hr_pks	100	sp|P0DUK1|PSPA_PENSO	4.02e-24	37.6	hr_pks	sp|P0DUK1|PSPA_PENSO	1.64e-21	37.6	sp|P0DUK1|PSPA_PENSO Highly reducing polyketide synthase pspA OS=Penicillium soppii OX=69789 GN=pspA PE=3 SV=1	Aspergillus_burnettii__gene-ETB97_008899
Aspergillus_burnettii__gene-ETB97_008924	1	6430	OTHER	100	BGC0002236__BAE65965.1	0	79.9	OTHER	sp|S0DZM7|BIK1_GIBF5	0	49.2	sp|S0DZM7|BIK1_GIBF5 Bikaverin polyketide synthase bik1 OS=Gibberella fujikuroi (strain CBS 195.34 / IMI 58289 / NRRL A-6831) OX=1279085 GN=bik1 PE=1 SV=1	Aspergillus_burnettii__gene-ETB97_008924
Aspergillus_burnettii__gene-ETB97_008960	1	6411	OTHER	100	BGC0000030__CCT67991.1	0	85.6	OTHER	sp|S0DZM7|BIK1_GIBF5	0	72.6	sp|S0DZM7|BIK1_GIBF5 Bikaverin polyketide synthase bik1 OS=Gibberella fujikuroi (strain CBS 195.34 / IMI 58289 / NRRL A-6831) OX=1279085 GN=bik1 PE=1 SV=1	Aspergillus_burnettii__gene-ETB97_008960
Aspergillus_burnettii__gene-ETB97_008996	1	8360	hr_pks	100	BGC0002525__BBU37368.1	6.22e-109	32.3	hr_pks	sp|A0A6S5ZY48|G433_FUSSX	5.26e-222	32.9	sp|A0A6S5ZY48|G433_FUSSX Highly reducing polyketide synthase g433 OS=Fusarium sp. OX=29916 GN=g433 PE=2 SV=1	Aspergillus_burnettii__gene-ETB97_008996
Aspergillus_burnettii__gene-ETB97_009021	1	8093	hr_pks	100	BGC0002605__AUS29485.1	0	77.4	hr_pks	sp|A0A1R3RGK0|OTAA_ASPC5	0	49.3	sp|A0A1R3RGK0|OTAA_ASPC5 Highly reducing polyketide synthase otaA OS=Aspergillus carbonarius (strain ITEM 5010) OX=602072 GN=otaA PE=2 SV=1	Aspergillus_burnettii__gene-ETB97_009021
Aspergillus_burnettii__gene-ETB97_009712	1	8356	hr_pks	100	aspergillus_uvarum_cbs_121591_gca_003184745__gene___BO82DRAFT_343463	3.35e-156	39.8	hr_pks	sp|A0A3G1DJH7|SQTKS_PHOSM	8.4e-252	31.8	sp|A0A3G1DJH7|SQTKS_PHOSM Squalestatin tetraketide synthase OS=Phoma sp. (strain ATCC 20986 / MF5453) OX=1828523 GN=pks1 PE=1 SV=1	Aspergillus_burnettii__gene-ETB97_009712
Aspergillus_burnettii__gene-ETB97_009854	1	5461	OTHER	100	BGC0000160__EAU32819.1	0	89	OTHER	sp|Q0CJ59|ATX_ASPTN	0	87.2	sp|Q0CJ59|ATX_ASPTN 6-methylsalicylic acid synthase OS=Aspergillus terreus (strain NIH 2624 / FGSC A1156) OX=341663 GN=atX PE=1 SV=1	Aspergillus_burnettii__gene-ETB97_009854
Aspergillus_burnettii__gene-ETB97_010300	1	5526	OTHER	100	sp|A1D8I9|NSCA_NEOFI	0	67.5	OTHER	sp|A1D8I9|NSCA_NEOFI	0	56	sp|A1D8I9|NSCA_NEOFI Non-reducing polyketide synthase nscA OS=Neosartorya fischeri (strain ATCC 1020 / DSM 3700 / CBS 544.65 / FGSC A1164 / JCM 1740 / NRRL 181 / WB 181) OX=331117 GN=nscA PE=3 SV=1	Aspergillus_burnettii__gene-ETB97_010300
Aspergillus_burnettii__gene-ETB97_010404	1	6635	OTHER	100	BGC0002161__ETS82099.1	7.02e-307	54.7	OTHER	sp|W3X7U2|PFMAE_PESFW	0	43.1	sp|W3X7U2|PFMAE_PESFW Conidial pigment polyketide synthase PfmaE OS=Pestalotiopsis fici (strain W106-1 / CGMCC3.15140) OX=1229662 GN=PfmaE PE=2 SV=1	Aspergillus_burnettii__gene-ETB97_010404
Aspergillus_burnettii__gene-ETB97_010413	1	6710	OUTLIER	*	None	None	None	None	sp|A0A1U8QK63|PKIC_EMENI	0	42.8	sp|A0A1U8QK63|PKIC_EMENI Fatty acid synthase beta subunit pkiC OS=Emericella nidulans (strain FGSC A4 / ATCC 38163 / CBS 112.46 / NRRL 194 / M139) OX=227321 GN=pkiC PE=1 SV=1	Aspergillus_burnettii__gene-ETB97_010413
Aspergillus_burnettii__gene-ETB97_011400	1	5681	OTHER	100	BGC0000070__ADI24953.1	0	83	OTHER	sp|D7PI15|GSFA_PENAE	0	49.2	sp|D7PI15|GSFA_PENAE Non-reducing polyketide synthase gsfA OS=Penicillium aethiopicum OX=36650 GN=gsfA PE=1 SV=1	Aspergillus_burnettii__gene-ETB97_011400
Aspergillus_burnettii__gene-ETB97_011846	1	8197	hr_pks	100	BGC0002222__BBU42026.1	1.16e-110	34.1	hr_pks	sp|N4WHE3|PKS1_COCH4	0	33.3	sp|N4WHE3|PKS1_COCH4 Reducing polyketide synthase PKS1 OS=Cochliobolus heterostrophus (strain C4 / ATCC 48331 / race T) OX=665024 GN=PKS1 PE=3 SV=1	Aspergillus_burnettii__gene-ETB97_011846
Aspergillus_burnettii__gene-ETB97_012163	1	7991	hr_pks	100	BGC0002525__BBU37368.1	9.03e-113	32.1	hr_pks	sp|A0A6S5ZY48|G433_FUSSX	2.65e-208	28.8	sp|A0A6S5ZY48|G433_FUSSX Highly reducing polyketide synthase g433 OS=Fusarium sp. OX=29916 GN=g433 PE=2 SV=1	Aspergillus_burnettii__gene-ETB97_012163
Aspergillus_burnettii__gene-ETB97_012270	1	12242	hr_pks	100	sp|A5ABG0|PYNA_ASPNC	6.41e-98	36.5	hr_pks	sp|A5ABG0|PYNA_ASPNC	0	36.9	sp|A5ABG0|PYNA_ASPNC Hybrid PKS-NRPS synthetase pynA OS=Aspergillus niger (strain CBS 513.88 / FGSC A1513) OX=425011 GN=pynA PE=1 SV=1	Aspergillus_burnettii__gene-ETB97_012270
Aspergillus_burnettii__gene-ETB97_012280	1	12366	hr_pks	100	BGC0001857__QBE85649.1	1.73e-190	53.9	hr_pks	sp|A0A411L027|BUAA_ASPBU	0	40.9	sp|A0A411L027|BUAA_ASPBU Hybrid PKS-NRPS synthetase buaA OS=Aspergillus burnettii OX=2508778 GN=buaA PE=3 SV=1	Aspergillus_burnettii__gene-ETB97_012280
Aspergillus_burnettii__gene-ETB97_012363	1	7899	hr_pks	100	sp|A0A0E4AZP0|FSA1_FUSSF	2.36e-223	45.4	hr_pks	sp|Q5SBL6|FSDS_FUSHE	0	41.3	sp|Q5SBL6|FSDS_FUSHE Fusaridione A synthetase fsdS OS=Fusarium heterosporum OX=42747 GN=fsdS PE=3 SV=2	Aspergillus_burnettii__gene-ETB97_012363
Aspergillus_burnettii__gene-ETB97_012593	1	8547	hr_pks	100	aspergillus_brasiliensis_cbs_101740_gca_001889945__gene___ASPBRDRAFT_199676	8.41e-90	43.9	hr_pks	sp|Q8J0F5|MLCB_PENCI	7.28e-115	24.5	sp|Q8J0F5|MLCB_PENCI Compactin diketide synthase mlcB OS=Penicillium citrinum OX=5077 GN=mlcB PE=1 SV=1	Aspergillus_burnettii__gene-ETB97_012593
Aspergillus_burnettii__gene-ETB97_012739	1	6712	OTHER	100	sp|A0A2H3CTK0|ARMB_ARMGA	6.11e-93	34.5	OTHER	sp|A0A284RE13|ARMB_ARMOS	1.01e-117	28.4	sp|A0A284RE13|ARMB_ARMOS Orsellinic acid synthase ArmB OS=Armillaria ostoyae OX=47428 GN=armB PE=1 SV=1	Aspergillus_burnettii__gene-ETB97_012739
Aspergillus_burnettii__gene-ETB97_012802	1	7995	hr_pks	100	BGC0002525__BBU37368.1	1.35e-106	40.3	hr_pks	sp|S3D9F1|GLOL_GLAL2	3.07e-278	36	sp|S3D9F1|GLOL_GLAL2 Highly reducing polyketide synthase gloL OS=Glarea lozoyensis (strain ATCC 20868 / MF5171) OX=1116229 GN=gloL PE=1 SV=1	Aspergillus_burnettii__gene-ETB97_012802
Aspergillus_burnettii__gene-ETB97_012838	1	7119	hr_pks	100	BGC0002240__KFG78606.1	0	58.2	hr_pks	sp|P0DUT7|BA17A_METAN	0	46.8	sp|P0DUT7|BA17A_METAN Highly reducing polyketide synthase 17 OS=Metarhizium anisopliae OX=5530 GN=Ba17a PE=1 SV=1	Aspergillus_burnettii__gene-ETB97_012838
Aspergillus_costaricaensis__gene10064	1	7926	hr_pks	100	BGC0001866__XP_028481819.1	8.33e-144	43.2	hr_pks	sp|S3D9F1|GLOL_GLAL2	8.28e-273	32.5	sp|S3D9F1|GLOL_GLAL2 Highly reducing polyketide synthase gloL OS=Glarea lozoyensis (strain ATCC 20868 / MF5171) OX=1116229 GN=gloL PE=1 SV=1	Aspergillus_costaricaensis__gene10064
Aspergillus_costaricaensis__gene10096	1	7708	hr_pks	100	BGC0002525__BBU37368.1	1.85e-270	50.6	hr_pks	sp|A0A6S5ZY48|G433_FUSSX	0	44.4	sp|A0A6S5ZY48|G433_FUSSX Highly reducing polyketide synthase g433 OS=Fusarium sp. OX=29916 GN=g433 PE=2 SV=1	Aspergillus_costaricaensis__gene10096
Aspergillus_costaricaensis__gene10185	1	7025	hr_pks	100	aspergillus_eucalypticola_cbs_122712_gca_003184535__gene___BO83DRAFT_449894	0	85.4	hr_pks	sp|N4WHE3|PKS1_COCH4	0	32.8	sp|N4WHE3|PKS1_COCH4 Reducing polyketide synthase PKS1 OS=Cochliobolus heterostrophus (strain C4 / ATCC 48331 / race T) OX=665024 GN=PKS1 PE=3 SV=1	Aspergillus_costaricaensis__gene10185
Aspergillus_costaricaensis__gene10604	1	8080	hr_pks	100	BGC0001141__AIA58899.1	7.52e-183	37.4	hr_pks	sp|A0A068ABB7|BREF7_EUPBR	1.29e-309	33	sp|A0A068ABB7|BREF7_EUPBR Highly reducing polyketide synthase OS=Eupenicillium brefeldianum OX=1131482 GN=Bref-PKS PE=1 SV=1	Aspergillus_costaricaensis__gene10604
Aspergillus_costaricaensis__gene10916	1	7486	hr_pks	100	BGC0002515__KAF9708863.1	1.08e-306	51.6	hr_pks	sp|D7UQ44|SOL1_ALTSO	0	43.4	sp|D7UQ44|SOL1_ALTSO Prosolanapyrone synthase OS=Alternaria solani OX=48100 GN=sol1 PE=1 SV=1	Aspergillus_costaricaensis__gene10916
Aspergillus_costaricaensis__gene10992	1	6326	OUTLIER	*	None	None	None	None	sp|P34229|FAS1_YARLI	0	59.5	sp|P34229|FAS1_YARLI Fatty acid synthase subunit beta OS=Yarrowia lipolytica (strain CLIB 122 / E 150) OX=284591 GN=FAS1 PE=3 SV=2	Aspergillus_costaricaensis__gene10992
Aspergillus_costaricaensis__gene11612	1	1638	OTHER	100	BGC0002212__ESK96613.1	3.31e-16	27.4	OTHER	sp|P71019|FABD_BACSU	1.33e-39	35.9	sp|P71019|FABD_BACSU Malonyl CoA-acyl carrier protein transacylase OS=Bacillus subtilis (strain 168) OX=224308 GN=fabD PE=3 SV=2	Aspergillus_costaricaensis__gene11612
Aspergillus_costaricaensis__gene11749	1	7689	hr_pks	100	BGC0002525__BBU37368.1	1.04e-242	46.5	hr_pks	sp|A0A6S5ZY48|G433_FUSSX	0	40.6	sp|A0A6S5ZY48|G433_FUSSX Highly reducing polyketide synthase g433 OS=Fusarium sp. OX=29916 GN=g433 PE=2 SV=1	Aspergillus_costaricaensis__gene11749
Aspergillus_costaricaensis__gene11757	1	8074	hr_pks	100	BGC0002196__QBK15047.1	9.7e-96	32.4	hr_pks	sp|A0A068ABB7|BREF7_EUPBR	7.53e-269	34.4	sp|A0A068ABB7|BREF7_EUPBR Highly reducing polyketide synthase OS=Eupenicillium brefeldianum OX=1131482 GN=Bref-PKS PE=1 SV=1	Aspergillus_costaricaensis__gene11757
Aspergillus_costaricaensis__gene1177	1	12144	hr_pks	100	BGC0002210__FAA01291.1	0	71.6	hr_pks	sp|A0A2V5GX43|PYVA_ASPV1	0	60.6	sp|A0A2V5GX43|PYVA_ASPV1 Hybrid PKS-NRPS synthetase pyvA OS=Aspergillus violaceofuscus (strain CBS 115571) OX=1450538 GN=pyvA PE=3 SV=1	Aspergillus_costaricaensis__gene1177
Aspergillus_costaricaensis__gene1293	1	255	OUTLIER	*	None	None	None	None	None	None	None	None	Aspergillus_costaricaensis__gene1293
Aspergillus_costaricaensis__gene1994	1	7423	hr_pks	100	BGC0000129__EAL89230.2	0	57.4	hr_pks	sp|A0A1V6NYI6|VERA_PENPO	0	46.1	sp|A0A1V6NYI6|VERA_PENPO Highly reducing polyketide synthase verA OS=Penicillium polonicum OX=60169 GN=verA PE=3 SV=1	Aspergillus_costaricaensis__gene1994
Aspergillus_costaricaensis__gene205	1	8280	hr_pks	100	BGC0002525__BBU37368.1	7.49e-76	30.8	hr_pks	sp|S3D9F1|GLOL_GLAL2	2.41e-153	28.7	sp|S3D9F1|GLOL_GLAL2 Highly reducing polyketide synthase gloL OS=Glarea lozoyensis (strain ATCC 20868 / MF5171) OX=1116229 GN=gloL PE=1 SV=1	Aspergillus_costaricaensis__gene205
Aspergillus_costaricaensis__gene233	1	6907	OTHER	100	sp|A2QUI2|ALBA_ASPNC	0	97.7	OTHER	sp|A2QUI2|ALBA_ASPNC	0	80.1	sp|A2QUI2|ALBA_ASPNC Non-reducing polyketide synthase albA OS=Aspergillus niger (strain CBS 513.88 / FGSC A1513) OX=425011 GN=albA PE=3 SV=1	Aspergillus_costaricaensis__gene233
Aspergillus_costaricaensis__gene2595	1	8387	hr_pks	100	aspergillus_brasiliensis_cbs_101740_gca_001889945__gene___ASPBRDRAFT_199676	1.14e-253	46.2	hr_pks	sp|Q5KTM9|ALT5_ALTSO	0	31	sp|Q5KTM9|ALT5_ALTSO Highly reducing polyketide synthase alt5 OS=Alternaria solani OX=48100 GN=alt5 PE=1 SV=1	Aspergillus_costaricaensis__gene2595
Aspergillus_costaricaensis__gene2910	1	7412	hr_pks	100	BGC0002729__EAA36364.1	2.69e-174	51.5	hr_pks	sp|Q7SHI6|SRDA_NEUCR	0	43.1	sp|Q7SHI6|SRDA_NEUCR Highly reducing polyketide synthase srdA OS=Neurospora crassa (strain ATCC 24698 / 74-OR23-1A / CBS 708.71 / DSM 1257 / FGSC 987) OX=367110 GN=srdA PE=2 SV=1	Aspergillus_costaricaensis__gene2910
Aspergillus_costaricaensis__gene3293	1	8233	hr_pks	100	sp|A0A0N0DCA3|DEP5_FUSLA	2.66e-111	50.8	hr_pks	sp|A0A0N0DCA3|DEP5_FUSLA	1.9e-199	30	sp|A0A0N0DCA3|DEP5_FUSLA Reducing polyketide synthase DEP5 OS=Fusarium langsethiae OX=179993 GN=DEP5 PE=2 SV=1	Aspergillus_costaricaensis__gene3293
Aspergillus_costaricaensis__gene3295	1	7826	hr_pks	100	BGC0000062__AAD43562.2	1.6e-299	58.1	hr_pks	sp|S3D9F1|GLOL_GLAL2	0	48.8	sp|S3D9F1|GLOL_GLAL2 Highly reducing polyketide synthase gloL OS=Glarea lozoyensis (strain ATCC 20868 / MF5171) OX=1116229 GN=gloL PE=1 SV=1	Aspergillus_costaricaensis__gene3295
Aspergillus_costaricaensis__gene3919	1	7469	hr_pks	100	aspergillus_aculeatinus_cbs_121060_gca_003184765__gene___BO66DRAFT_460892	4.32e-202	69.5	hr_pks	sp|A0A0A2JW91|CNSI_PENEN	0	45.6	sp|A0A0A2JW91|CNSI_PENEN Highly reducing polyketide synthase cnsI OS=Penicillium expansum OX=27334 GN=cnsI PE=1 SV=1	Aspergillus_costaricaensis__gene3919
Aspergillus_costaricaensis__gene3929	1	9038	hr_pks	100	BGC0002525__BBU37368.1	3.75e-237	44.9	hr_pks	sp|A0A6S5ZY48|G433_FUSSX	0	41.5	sp|A0A6S5ZY48|G433_FUSSX Highly reducing polyketide synthase g433 OS=Fusarium sp. OX=29916 GN=g433 PE=2 SV=1	Aspergillus_costaricaensis__gene3929
Aspergillus_costaricaensis__gene3988	1	7897	OTHER	100	sp|Q5B7U4|PKIA_EMENI	0	62.4	OTHER	sp|Q5B7U4|PKIA_EMENI	0	54.2	sp|Q5B7U4|PKIA_EMENI Non-reducing polyketide synthase pkiA OS=Emericella nidulans (strain FGSC A4 / ATCC 38163 / CBS 112.46 / NRRL 194 / M139) OX=227321 GN=pkiA PE=1 SV=1	Aspergillus_costaricaensis__gene3988
Aspergillus_costaricaensis__gene3991	1	6420	OUTLIER	*	None	None	None	None	sp|A0A1U8QK63|PKIC_EMENI	0	51.8	sp|A0A1U8QK63|PKIC_EMENI Fatty acid synthase beta subunit pkiC OS=Emericella nidulans (strain FGSC A4 / ATCC 38163 / CBS 112.46 / NRRL 194 / M139) OX=227321 GN=pkiC PE=1 SV=1	Aspergillus_costaricaensis__gene3991
Aspergillus_costaricaensis__gene408	1	8315	hr_pks	100	dibaeis_baeomyces__gene_5150	1.35e-184	43.1	hr_pks	sp|G4NEB1|NEC1_MAGO7	0	34.4	sp|G4NEB1|NEC1_MAGO7 Highly reducing polyketide synthase NEC1 OS=Magnaporthe oryzae (strain 70-15 / ATCC MYA-4617 / FGSC 8958) OX=242507 GN=NEC1 PE=1 SV=1	Aspergillus_costaricaensis__gene408
Aspergillus_costaricaensis__gene4267	1	8211	hr_pks	99.9	BGC0002525__BBU37368.1	1.29e-71	33.6	hr_pks	sp|A0A6S5ZY48|G433_FUSSX	2.91e-248	29.6	sp|A0A6S5ZY48|G433_FUSSX Highly reducing polyketide synthase g433 OS=Fusarium sp. OX=29916 GN=g433 PE=2 SV=1	Aspergillus_costaricaensis__gene4267
Aspergillus_costaricaensis__gene4273	1	8175	OTHER	100	BGC0002603__BBG28471.1	1.67e-104	46.8	OTHER	sp|Q0CRQ5|5MOAS_ASPTN	7.39e-116	29.5	sp|Q0CRQ5|5MOAS_ASPTN 5-methylorsellinic acid synthase OS=Aspergillus terreus (strain NIH 2624 / FGSC A1156) OX=341663 GN=ATEG_03629 PE=1 SV=1	Aspergillus_costaricaensis__gene4273
Aspergillus_costaricaensis__gene4337	1	6480	OUTLIER	*	None	None	None	None	sp|P34229|FAS1_YARLI	0	43.4	sp|P34229|FAS1_YARLI Fatty acid synthase subunit beta OS=Yarrowia lipolytica (strain CLIB 122 / E 150) OX=284591 GN=FAS1 PE=3 SV=2	Aspergillus_costaricaensis__gene4337
Aspergillus_costaricaensis__gene434	1	617	hr_pks	99.6	BGC0002729__EAA36364.1	3.87e-37	58.4	hr_pks	sp|Q7SHI6|SRDA_NEUCR	1.41e-34	58.4	sp|Q7SHI6|SRDA_NEUCR Highly reducing polyketide synthase srdA OS=Neurospora crassa (strain ATCC 24698 / 74-OR23-1A / CBS 708.71 / DSM 1257 / FGSC 987) OX=367110 GN=srdA PE=2 SV=1	Aspergillus_costaricaensis__gene434
Aspergillus_costaricaensis__gene435	1	6827	hr_pks	100	BGC0002729__EAA36364.1	5.95e-115	42.4	hr_pks	sp|Q7SHI6|SRDA_NEUCR	0	37.3	sp|Q7SHI6|SRDA_NEUCR Highly reducing polyketide synthase srdA OS=Neurospora crassa (strain ATCC 24698 / 74-OR23-1A / CBS 708.71 / DSM 1257 / FGSC 987) OX=367110 GN=srdA PE=2 SV=1	Aspergillus_costaricaensis__gene435
Aspergillus_costaricaensis__gene4503	1	5394	OTHER	100	BGC0000156__AEN83889.1	0	97.3	OTHER	sp|A2QX22|ADAA_ASPNC	0	95.2	sp|A2QX22|ADAA_ASPNC Non-reducing polyketide synthase adaA OS=Aspergillus niger (strain CBS 513.88 / FGSC A1513) OX=425011 GN=adaA PE=1 SV=1	Aspergillus_costaricaensis__gene4503
Aspergillus_costaricaensis__gene4570	1	12206	hr_pks	100	BGC0001892__ATZ45182.1	4.09e-163	44.4	hr_pks	sp|A0A2Z5TM64|HIMA_ASPJA	0	32.7	sp|A0A2Z5TM64|HIMA_ASPJA Polyketide synthase-nonribosomal peptide synthetase hybrid himA OS=Aspergillus japonicus OX=34381 GN=himA PE=3 SV=1	Aspergillus_costaricaensis__gene4570
Aspergillus_costaricaensis__gene4750	1	7737	hr_pks	100	aspergillus_aculeatinus_cbs_121060_gca_003184765__gene___BO66DRAFT_460892	1.21e-164	49.4	hr_pks	sp|A0A0A2JW91|CNSI_PENEN	0	39.9	sp|A0A0A2JW91|CNSI_PENEN Highly reducing polyketide synthase cnsI OS=Penicillium expansum OX=27334 GN=cnsI PE=1 SV=1	Aspergillus_costaricaensis__gene4750
Aspergillus_costaricaensis__gene4811	1	7518	hr_pks	100	BGC0001892__ATZ45182.1	7.48e-254	48.4	hr_pks	sp|D9N1A1|ACTS3_ALTAL	0	37.9	sp|D9N1A1|ACTS3_ALTAL Highly reducing polyketide synthase ACTTS3 OS=Alternaria alternata OX=5599 GN=ACTTS3 PE=2 SV=1	Aspergillus_costaricaensis__gene4811
Aspergillus_costaricaensis__gene4873	1	8302	hr_pks	100	BGC0001358__OAQ83765.1	6.45e-126	55.5	hr_pks	sp|A0A6S5ZY48|G433_FUSSX	2.03e-304	33.4	sp|A0A6S5ZY48|G433_FUSSX Highly reducing polyketide synthase g433 OS=Fusarium sp. OX=29916 GN=g433 PE=2 SV=1	Aspergillus_costaricaensis__gene4873
Aspergillus_costaricaensis__gene5372	1	7426	hr_pks	100	Ophiocordyceps_sinensis__gene-G6O67_007912	1.85e-116	34.3	hr_pks	sp|Q5KTM9|ALT5_ALTSO	7.23e-206	28	sp|Q5KTM9|ALT5_ALTSO Highly reducing polyketide synthase alt5 OS=Alternaria solani OX=48100 GN=alt5 PE=1 SV=1	Aspergillus_costaricaensis__gene5372
Aspergillus_costaricaensis__gene5454	1	6312	OUTLIER	*	None	None	None	None	sp|Q2TXG3|ORYB_ASPOR	0	46.9	sp|Q2TXG3|ORYB_ASPOR Fatty acid synthase subunit beta OS=Aspergillus oryzae (strain ATCC 42149 / RIB 40) OX=510516 GN=oryfasB PE=3 SV=1	Aspergillus_costaricaensis__gene5454
Aspergillus_costaricaensis__gene5499	1	8244	OTHER	100	BGC0002483__AUW31052.1	3.63e-144	35.5	OTHER	sp|Q5AZ32|PKBA_EMENI	1.2e-144	31.8	sp|Q5AZ32|PKBA_EMENI Non-reducing polyketide synthase pkbA OS=Emericella nidulans (strain FGSC A4 / ATCC 38163 / CBS 112.46 / NRRL 194 / M139) OX=227321 GN=pkbA PE=1 SV=1	Aspergillus_costaricaensis__gene5499
Aspergillus_costaricaensis__gene5520	1	6788	hr_pks	100	cadophora_sp_dse1049_gca_003073865__gene___DL98DRAFT_485729	5.32e-177	52.9	hr_pks	sp|N4WHE3|PKS1_COCH4	1.61e-262	30.7	sp|N4WHE3|PKS1_COCH4 Reducing polyketide synthase PKS1 OS=Cochliobolus heterostrophus (strain C4 / ATCC 48331 / race T) OX=665024 GN=PKS1 PE=3 SV=1	Aspergillus_costaricaensis__gene5520
Aspergillus_costaricaensis__gene5964	1	5553	OTHER	100	BGC0002171__EHA27898.1	0	89.9	OTHER	sp|G3XNF4|ATPKS_ASPNA	0	88.8	sp|G3XNF4|ATPKS_ASPNA PKS-NRPS hybrid synthetase ATPKS OS=Aspergillus niger (strain ATCC 1015 / CBS 113.46 / FGSC A1144 / LSHB Ac4 / NCTC 3858a / NRRL 328 / USDA 3528.7) OX=380704 GN=ATPKS PE=1 SV=1	Aspergillus_costaricaensis__gene5964
Aspergillus_costaricaensis__gene6250	1	5002	OTHER	100	BGC0001266__ADM79459.1	2.22e-107	44.8	OTHER	sp|E9KMQ2|GRA1_CLAGR	2.13e-178	38.6	sp|E9KMQ2|GRA1_CLAGR Non-reducing polyketide synthase PKS16 OS=Cladonia grayi OX=27339 GN=PKS16 PE=2 SV=1	Aspergillus_costaricaensis__gene6250
Aspergillus_costaricaensis__gene6301	1	11940	hr_pks	100	BGC0001857__QBE85649.1	0	56.3	hr_pks	sp|A0A411L027|BUAA_ASPBU	0	39.7	sp|A0A411L027|BUAA_ASPBU Hybrid PKS-NRPS synthetase buaA OS=Aspergillus burnettii OX=2508778 GN=buaA PE=3 SV=1	Aspergillus_costaricaensis__gene6301
Aspergillus_costaricaensis__gene6458	1	8225	hr_pks	100	BGC0001358__OAQ83760.1	4.14e-147	66.5	hr_pks	sp|A0A179H2I8|LCSB_PURLI	0	47.1	sp|A0A179H2I8|LCSB_PURLI Highly reducing polyketide synthase lcsB OS=Purpureocillium lilacinum OX=33203 GN=lcsB PE=2 SV=1	Aspergillus_costaricaensis__gene6458
Aspergillus_costaricaensis__gene6467	1	8457	hr_pks	100	aspergillus_calidoustus_gca_001511075__gene___ASPCAL07647	3.43e-85	45.7	hr_pks	sp|Q0C8L6|LOVF_ASPTN	2.25e-157	25.7	sp|Q0C8L6|LOVF_ASPTN Lovastatin diketide synthase lovF OS=Aspergillus terreus (strain NIH 2624 / FGSC A1156) OX=341663 GN=lovF PE=1 SV=1	Aspergillus_costaricaensis__gene6467
Aspergillus_costaricaensis__gene6511	1	5057	OTHER	100	sp|A2QK66|KTNS_ASPNC	0	87.7	OTHER	sp|A2QK66|KTNS_ASPNC	0	84.7	sp|A2QK66|KTNS_ASPNC Kotanin synthase OS=Aspergillus niger (strain CBS 513.88 / FGSC A1513) OX=425011 GN=ktnS PE=3 SV=1	Aspergillus_costaricaensis__gene6511
Aspergillus_costaricaensis__gene6854	1	6407	OUTLIER	*	None	None	None	None	sp|Q5AV07|ATNM_EMENI	0	46.7	sp|Q5AV07|ATNM_EMENI Fatty acid synthase beta subunit aflB OS=Emericella nidulans (strain FGSC A4 / ATCC 38163 / CBS 112.46 / NRRL 194 / M139) OX=227321 GN=atnM PE=2 SV=1	Aspergillus_costaricaensis__gene6854
Aspergillus_costaricaensis__gene7130	1	5847	OTHER	100	BGC0000168__ADI24926.1	0	87.8	OTHER	sp|D7PHZ2|VRTA_PENAE	0	82.7	sp|D7PHZ2|VRTA_PENAE Non-reducing polyketide synthase vrtA OS=Penicillium aethiopicum OX=36650 GN=vrtA PE=1 SV=1	Aspergillus_costaricaensis__gene7130
Aspergillus_costaricaensis__gene7252	1	995	OTHER	100	sp|P9WET2|PREU6_PREIS	1.69e-161	69.1	OTHER	sp|A0A455R5P9|ASCC_ACREG	2.02e-129	61	sp|A0A455R5P9|ASCC_ACREG Non-reducing polyketide synthase ascC OS=Acremonium egyptiacum OX=749675 GN=ascC PE=1 SV=1	Aspergillus_costaricaensis__gene7252
Aspergillus_costaricaensis__gene7255	1	6597	hr_pks	100	BGC0002187__OAQ63050.2	1.99e-45	37.6	macrolactone_ancestral_clade	sp|G4NEB1|NEC1_MAGO7	8.01e-135	25.6	sp|G4NEB1|NEC1_MAGO7 Highly reducing polyketide synthase NEC1 OS=Magnaporthe oryzae (strain 70-15 / ATCC MYA-4617 / FGSC 8958) OX=242507 GN=NEC1 PE=1 SV=1	Aspergillus_costaricaensis__gene7255
Aspergillus_costaricaensis__gene7735	1	8171	hr_pks	100	BGC0002525__BBU37368.1	2.26e-122	39.1	hr_pks	sp|S3D9F1|GLOL_GLAL2	1.35e-171	26.1	sp|S3D9F1|GLOL_GLAL2 Highly reducing polyketide synthase gloL OS=Glarea lozoyensis (strain ATCC 20868 / MF5171) OX=1116229 GN=gloL PE=1 SV=1	Aspergillus_costaricaensis__gene7735
Aspergillus_costaricaensis__gene7821	1	6722	OTHER	100	BGC0001578__EED21099.1	2.66e-270	65.2	OTHER	sp|A0A142C799|PHNA_PENHR	2.28e-250	37.6	sp|A0A142C799|PHNA_PENHR Non-reducing polyketide synthase phnA OS=Penicillium herquei OX=69774 GN=phnA PE=1 SV=1	Aspergillus_costaricaensis__gene7821
Aspergillus_costaricaensis__gene7848	1	8488	hr_pks	100	Aspergillus_kawachii__gene9341	0	66.8	hr_pks	sp|G4NEB1|NEC1_MAGO7	7.03e-175	30.2	sp|G4NEB1|NEC1_MAGO7 Highly reducing polyketide synthase NEC1 OS=Magnaporthe oryzae (strain 70-15 / ATCC MYA-4617 / FGSC 8958) OX=242507 GN=NEC1 PE=1 SV=1	Aspergillus_costaricaensis__gene7848
Aspergillus_costaricaensis__gene8116	1	1731	OTHER	100	BGC0001244__AIW00670.1	8.75e-13	33.6	OTHER	sp|Q8L3X9|KASM_ARATH	6.27e-37	58.6	sp|Q8L3X9|KASM_ARATH 3-oxoacyl-[acyl-carrier-protein] synthase, mitochondrial OS=Arabidopsis thaliana OX=3702 GN=KAS PE=1 SV=1	Aspergillus_costaricaensis__gene8116
Aspergillus_costaricaensis__gene8416	1	7458	hr_pks	100	sp|P9WEQ0|OLCA_PENCN	0	57.1	hr_pks	sp|A0A1V6NYI6|VERA_PENPO	0	46	sp|A0A1V6NYI6|VERA_PENPO Highly reducing polyketide synthase verA OS=Penicillium polonicum OX=60169 GN=verA PE=3 SV=1	Aspergillus_costaricaensis__gene8416
Aspergillus_costaricaensis__gene9123	1	8505	hr_pks	100	aspergillus_piperis_cbs_112811_gca_003184755__gene___BO85DRAFT_363683	7.86e-118	36.1	hr_pks	sp|C8VJR7|ALNA_EMENI	5.31e-89	25.3	sp|C8VJR7|ALNA_EMENI Highly reducing polyketide synthase alnA OS=Emericella nidulans (strain FGSC A4 / ATCC 38163 / CBS 112.46 / NRRL 194 / M139) OX=227321 GN=alnA PE=1 SV=1	Aspergillus_costaricaensis__gene9123
Aspergillus_costaricaensis__gene921	1	8681	hr_pks	100	aspergillus_tubingensis_cbs_134_48_gca_001890745__gene___ASPTUDRAFT_927185	1.46e-141	34.7	hr_pks	sp|Q3S2U6|MOKB_MONPI	7.16e-242	29	sp|Q3S2U6|MOKB_MONPI Lovastatin diketide synthase mokB OS=Monascus pilosus OX=89488 GN=mokB PE=1 SV=1	Aspergillus_costaricaensis__gene921
Aspergillus_costaricaensis__gene9269	1	11408	hr_pks	100	BGC0000992__AAV66110.2	4.8e-158	44.7	hr_pks	sp|Q5SBL6|FSDS_FUSHE	0	30.5	sp|Q5SBL6|FSDS_FUSHE Fusaridione A synthetase fsdS OS=Fusarium heterosporum OX=42747 GN=fsdS PE=3 SV=2	Aspergillus_costaricaensis__gene9269
Aspergillus_costaricaensis__gene9518	1	7950	hr_pks	100	amorphotheca_resinae_atcc_22711_gca_003019875__gene___M430DRAFT_109173	2.77e-133	43.1	hr_pks	sp|Q8J0F5|MLCB_PENCI	2.74e-184	27.3	sp|Q8J0F5|MLCB_PENCI Compactin diketide synthase mlcB OS=Penicillium citrinum OX=5077 GN=mlcB PE=1 SV=1	Aspergillus_costaricaensis__gene9518
Aspergillus_costaricaensis__gene9721	1	7791	hr_pks	100	BGC0001749__EHA52508.1	3.53e-123	39.5	hr_pks	sp|Q7SHI6|SRDA_NEUCR	8.23e-203	37.1	sp|Q7SHI6|SRDA_NEUCR Highly reducing polyketide synthase srdA OS=Neurospora crassa (strain ATCC 24698 / 74-OR23-1A / CBS 708.71 / DSM 1257 / FGSC 987) OX=367110 GN=srdA PE=2 SV=1	Aspergillus_costaricaensis__gene9721
Aspergillus_fijiensis__gene10408	1	7015	OUTLIER	*	None	None	None	None	sp|P34229|FAS1_YARLI	0	60	sp|P34229|FAS1_YARLI Fatty acid synthase subunit beta OS=Yarrowia lipolytica (strain CLIB 122 / E 150) OX=284591 GN=FAS1 PE=3 SV=2	Aspergillus_fijiensis__gene10408
Aspergillus_fijiensis__gene10470	1	1622	OTHER	100	BGC0002212__ESK96613.1	1.47e-13	23.5	OTHER	sp|P71019|FABD_BACSU	2.31e-38	33.5	sp|P71019|FABD_BACSU Malonyl CoA-acyl carrier protein transacylase OS=Bacillus subtilis (strain 168) OX=224308 GN=fabD PE=3 SV=2	Aspergillus_fijiensis__gene10470
Aspergillus_fijiensis__gene10652	1	5565	OTHER	100	sp|Q5AUX7|DBAI_EMENI	3.97e-39	87.3	OTHER	sp|Q5AUX7|DBAI_EMENI	0	32.7	sp|Q5AUX7|DBAI_EMENI Non-reducing polyketide synthase dbaI OS=Emericella nidulans (strain FGSC A4 / ATCC 38163 / CBS 112.46 / NRRL 194 / M139) OX=227321 GN=dbaI PE=1 SV=2	Aspergillus_fijiensis__gene10652
Aspergillus_fijiensis__gene11434	1	7494	hr_pks	100	BGC0002234__EYE95336.1	5.63e-168	37.7	hr_pks	sp|G9N4B2|VIRA_HYPVG	0	43.8	sp|G9N4B2|VIRA_HYPVG Highly reducing polyketide synthase virA OS=Hypocrea virens (strain Gv29-8 / FGSC 10586) OX=413071 GN=virA PE=1 SV=1	Aspergillus_fijiensis__gene11434
Aspergillus_fijiensis__gene11468	1	5787	OTHER	100	BGC0001266__ADM79459.1	4.25e-111	38.2	OTHER	sp|E9KMQ2|GRA1_CLAGR	6.86e-192	38.6	sp|E9KMQ2|GRA1_CLAGR Non-reducing polyketide synthase PKS16 OS=Cladonia grayi OX=27339 GN=PKS16 PE=2 SV=1	Aspergillus_fijiensis__gene11468
Aspergillus_fijiensis__gene11639	1	6886	OUTLIER	*	None	None	None	None	sp|P34229|FAS1_YARLI	0	43.4	sp|P34229|FAS1_YARLI Fatty acid synthase subunit beta OS=Yarrowia lipolytica (strain CLIB 122 / E 150) OX=284591 GN=FAS1 PE=3 SV=2	Aspergillus_fijiensis__gene11639
Aspergillus_fijiensis__gene11717	1	7879	OTHER	100	sp|Q5B7U4|PKIA_EMENI	0	62	OTHER	sp|Q5B7U4|PKIA_EMENI	0	56.7	sp|Q5B7U4|PKIA_EMENI Non-reducing polyketide synthase pkiA OS=Emericella nidulans (strain FGSC A4 / ATCC 38163 / CBS 112.46 / NRRL 194 / M139) OX=227321 GN=pkiA PE=1 SV=1	Aspergillus_fijiensis__gene11717
Aspergillus_fijiensis__gene11721	1	6331	OUTLIER	*	None	None	None	None	sp|A0A1U8QK63|PKIC_EMENI	0	52.9	sp|A0A1U8QK63|PKIC_EMENI Fatty acid synthase beta subunit pkiC OS=Emericella nidulans (strain FGSC A4 / ATCC 38163 / CBS 112.46 / NRRL 194 / M139) OX=227321 GN=pkiC PE=1 SV=1	Aspergillus_fijiensis__gene11721
Aspergillus_fijiensis__gene11984	1	11775	hr_pks	100	aspergillus_piperis_cbs_112811_gca_003184755__gene___BO85DRAFT_363683	8.58e-131	38.6	hr_pks	sp|P23623|OXLA_NEUCR	7.7e-150	42.2	sp|P23623|OXLA_NEUCR L-amino-acid oxidase OS=Neurospora crassa (strain ATCC 24698 / 74-OR23-1A / CBS 708.71 / DSM 1257 / FGSC 987) OX=367110 GN=lox PE=1 SV=2	Aspergillus_fijiensis__gene11984
Aspergillus_fijiensis__gene12029	1	5895	hr_pks	100	rasamsonia_emersonii_cbs_393_64_gca_000968595__gene___T310_9851	5.29e-209	44.9	hr_pks	sp|A0A098D8A0|ZEA2_GIBZE	8.73e-167	40.4	sp|A0A098D8A0|ZEA2_GIBZE Highly reducing polyketide synthase ZEA2 OS=Gibberella zeae (strain ATCC MYA-4620 / CBS 123657 / FGSC 9075 / NRRL 31084 / PH-1) OX=229533 GN=ZEA2 PE=2 SV=1	Aspergillus_fijiensis__gene12029
Aspergillus_fijiensis__gene1321	1	7738	hr_pks	100	BGC0002169__OJJ98486.1	1.6e-248	87.9	hr_pks	sp|A0A1L9WQM9|ACRA_ASPA1	0	91	sp|A0A1L9WQM9|ACRA_ASPA1 Highly reducing polyketide synthase acrA OS=Aspergillus aculeatus (strain ATCC 16872 / CBS 172.66 / WB 5094) OX=690307 GN=acrA PE=2 SV=1	Aspergillus_fijiensis__gene1321
Aspergillus_fijiensis__gene1468	1	11811	hr_pks	100	BGC0001874__AFA26384.1	0	61.5	hr_pks	sp|B6F209|CPAS_ASPOZ	0	49.7	sp|B6F209|CPAS_ASPOZ Cyclo-acetoacetyl-L-tryptophan synthase OS=Aspergillus oryzae OX=5062 GN=cpaA PE=1 SV=1	Aspergillus_fijiensis__gene1468
Aspergillus_fijiensis__gene1512	1	6925	OTHER	100	sp|P9WET3|PREU8_PREIS	3.84e-320	54.4	OTHER	sp|W3X7U2|PFMAE_PESFW	0	42.3	sp|W3X7U2|PFMAE_PESFW Conidial pigment polyketide synthase PfmaE OS=Pestalotiopsis fici (strain W106-1 / CGMCC3.15140) OX=1229662 GN=PfmaE PE=2 SV=1	Aspergillus_fijiensis__gene1512
Aspergillus_fijiensis__gene1527	1	12257	hr_pks	100	sp|S7Z800|OPDA_PENO1	0	83.9	hr_pks	sp|P0DO30|ILIA_NEOS2	0	46.8	sp|P0DO30|ILIA_NEOS2 Hybrid PKS-NRPS synthetase iliA OS=Neonectria sp. (strain DH2) OX=1735992 GN=iliA PE=1 SV=1	Aspergillus_fijiensis__gene1527
Aspergillus_fijiensis__gene1916	1	7447	hr_pks	100	BGC0001141__AIA58899.1	7.25e-133	50.8	hr_pks	sp|A0A068ABB7|BREF7_EUPBR	0	41.1	sp|A0A068ABB7|BREF7_EUPBR Highly reducing polyketide synthase OS=Eupenicillium brefeldianum OX=1131482 GN=Bref-PKS PE=1 SV=1	Aspergillus_fijiensis__gene1916
Aspergillus_fijiensis__gene2463	1	7268	OTHER	100	sp|A0A1L9UCG2|ALBA_ASPBC	0	84.6	OTHER	sp|A0A1L9UCG2|ALBA_ASPBC	0	77.4	sp|A0A1L9UCG2|ALBA_ASPBC Non-reducing polyketide synthase albA OS=Aspergillus brasiliensis (strain CBS 101740 / IMI 381727 / IBT 21946) OX=767769 GN=albA PE=3 SV=1	Aspergillus_fijiensis__gene2463
Aspergillus_fijiensis__gene2699	1	8044	OTHER	100	sp|P9WET2|PREU6_PREIS	2.23e-271	49.5	OTHER	sp|Q0CRQ5|5MOAS_ASPTN	0	33.8	sp|Q0CRQ5|5MOAS_ASPTN 5-methylorsellinic acid synthase OS=Aspergillus terreus (strain NIH 2624 / FGSC A1156) OX=341663 GN=ATEG_03629 PE=1 SV=1	Aspergillus_fijiensis__gene2699
Aspergillus_fijiensis__gene2789	1	6820	OTHER	100	BGC0002209__KIA75596.1	7.31e-238	45.3	OTHER	sp|Q5AZ32|PKBA_EMENI	0	36.1	sp|Q5AZ32|PKBA_EMENI Non-reducing polyketide synthase pkbA OS=Emericella nidulans (strain FGSC A4 / ATCC 38163 / CBS 112.46 / NRRL 194 / M139) OX=227321 GN=pkbA PE=1 SV=1	Aspergillus_fijiensis__gene2789
Aspergillus_fijiensis__gene3493	1	6476	OTHER	100	BGC0000027__AGN71604.1	0	60	OTHER	sp|Q5AUX7|DBAI_EMENI	0	48.2	sp|Q5AUX7|DBAI_EMENI Non-reducing polyketide synthase dbaI OS=Emericella nidulans (strain FGSC A4 / ATCC 38163 / CBS 112.46 / NRRL 194 / M139) OX=227321 GN=dbaI PE=1 SV=2	Aspergillus_fijiensis__gene3493
Aspergillus_fijiensis__gene3494__renamed0017	1	7122	hr_pks	100	Aspergillus_fijiensis__gene3494	0	80.1	hr_pks	sp|E5A7D9|PKS5_LEPMJ	0	40.5	sp|E5A7D9|PKS5_LEPMJ Highly reducing polyketide synthase pks5 OS=Leptosphaeria maculans (strain JN3 / isolate v23.1.3 / race Av1-4-5-6-7-8) OX=985895 GN=pks5 PE=2 SV=1	Aspergillus_fijiensis__gene3494
Aspergillus_fijiensis__gene3626	1	8099	hr_pks	100	sp|A0A0E4AZP0|FSA1_FUSSF	9.81e-240	60.2	hr_pks	sp|A0A0E4AZP0|FSA1_FUSSF	0	44.9	sp|A0A0E4AZP0|FSA1_FUSSF Hybrid PKS-NRPS synthetase fsa1 OS=Fusarium sp. (strain FN080326) OX=1608308 GN=fsa1 PE=3 SV=1	Aspergillus_fijiensis__gene3626
Aspergillus_fijiensis__gene3915	1	8263	hr_pks	100	BGC0002525__BBU37368.1	3.63e-162	36.6	hr_pks	sp|A0A6S5ZY48|G433_FUSSX	1.04e-286	31	sp|A0A6S5ZY48|G433_FUSSX Highly reducing polyketide synthase g433 OS=Fusarium sp. OX=29916 GN=g433 PE=2 SV=1	Aspergillus_fijiensis__gene3915
Aspergillus_fijiensis__gene4112	1	5562	OTHER	100	BGC0002062__QBG38888.1	8.41e-312	66.5	OTHER	sp|A0A411PQP9|AGPKS_PAEDI	0	49.7	sp|A0A411PQP9|AGPKS_PAEDI Atrochrysone carboxylic acid synthase Agnpks1 OS=Paecilomyces divaricatus OX=644132 GN=Agnpks1 PE=3 SV=1	Aspergillus_fijiensis__gene4112
Aspergillus_fijiensis__gene4920	1	9017	hr_pks	100	sp|A0A1V6PAF7|CALA_PENDC	0	81.5	hr_pks	sp|A0A1V6PAF7|CALA_PENDC	0	79.1	sp|A0A1V6PAF7|CALA_PENDC Highly reducing polyketide synthase calA OS=Penicillium decumbens OX=69771 GN=calA PE=1 SV=1	Aspergillus_fijiensis__gene4920
Aspergillus_fijiensis__gene5048	1	8027	hr_pks	100	sp|Q0CS88|TAZB_ASPTN	3.34e-209	42	hr_pks	sp|G3XMD1|AZAB_ASPNA	1.33e-217	32.8	sp|G3XMD1|AZAB_ASPNA Highly reducing polyketide synthase azaB OS=Aspergillus niger (strain ATCC 1015 / CBS 113.46 / FGSC A1144 / LSHB Ac4 / NCTC 3858a / NRRL 328 / USDA 3528.7) OX=380704 GN=azaB PE=1 SV=1	Aspergillus_fijiensis__gene5048
Aspergillus_fijiensis__gene5353	1	9035	hr_pks	100	sp|P0DUK1|PSPA_PENSO	2.29e-103	37.1	hr_pks	sp|S3D9F1|GLOL_GLAL2	4.54e-309	32.1	sp|S3D9F1|GLOL_GLAL2 Highly reducing polyketide synthase gloL OS=Glarea lozoyensis (strain ATCC 20868 / MF5171) OX=1116229 GN=gloL PE=1 SV=1	Aspergillus_fijiensis__gene5353
Aspergillus_fijiensis__gene5615	1	9220	hr_pks	100	BGC0000098__ABA02239.1	0	61	hr_pks	sp|Q3S2T9|MOKA_MONPI	0	50.5	sp|Q3S2T9|MOKA_MONPI Lovastatin nonaketide synthase mokA OS=Monascus pilosus OX=89488 GN=mokA PE=1 SV=1	Aspergillus_fijiensis__gene5615
Aspergillus_fijiensis__gene6243	1	7535	hr_pks	99.1	sp|P9WEQ0|OLCA_PENCN	7.12e-319	56.5	hr_pks	sp|A0A1V6NYI6|VERA_PENPO	0	44	sp|A0A1V6NYI6|VERA_PENPO Highly reducing polyketide synthase verA OS=Penicillium polonicum OX=60169 GN=verA PE=3 SV=1	Aspergillus_fijiensis__gene6243
Aspergillus_fijiensis__gene6473	1	8146	hr_pks	100	pseudogymnoascus_sp_vkm_f_4281_fw_2241_gca_000750745__gene___V493_03714	2.26e-129	38.6	hr_pks	sp|N4WHE3|PKS1_COCH4	0	31.8	sp|N4WHE3|PKS1_COCH4 Reducing polyketide synthase PKS1 OS=Cochliobolus heterostrophus (strain C4 / ATCC 48331 / race T) OX=665024 GN=PKS1 PE=3 SV=1	Aspergillus_fijiensis__gene6473
Aspergillus_fijiensis__gene649__renamed0018	1	7786	hr_pks	100	Aspergillus_fijiensis__gene649	0	85.7	hr_pks	sp|A0A0A2JW91|CNSI_PENEN	0	46	sp|A0A0A2JW91|CNSI_PENEN Highly reducing polyketide synthase cnsI OS=Penicillium expansum OX=27334 GN=cnsI PE=1 SV=1	Aspergillus_fijiensis__gene649
Aspergillus_fijiensis__gene686	1	5265	OTHER	100	BGC0002229__OJJ97578.1	0	98.8	OTHER	sp|A0A1L9WN37|ACUA_ASPA1	0	97.1	sp|A0A1L9WN37|ACUA_ASPA1 6-methylsalicylic acid synthase acuA OS=Aspergillus aculeatus (strain ATCC 16872 / CBS 172.66 / WB 5094) OX=690307 GN=acuA PE=1 SV=1	Aspergillus_fijiensis__gene686
Aspergillus_fijiensis__gene7537	1	653	OTHER	100	BGC0000160__EAU32819.1	3.18e-42	60.5	OTHER	sp|Q0CJ59|ATX_ASPTN	4.87e-40	59.5	sp|Q0CJ59|ATX_ASPTN 6-methylsalicylic acid synthase OS=Aspergillus terreus (strain NIH 2624 / FGSC A1156) OX=341663 GN=atX PE=1 SV=1	Aspergillus_fijiensis__gene7537
Aspergillus_fijiensis__gene7792	1	13010	hr_pks	99	sp|A0A0G0AID6|THNA_TRIHA	2.08e-310	57.3	hr_pks	sp|A1CLY8|CCSA_ASPCL	0	40.6	sp|A1CLY8|CCSA_ASPCL Polyketide synthase-nonribosomal peptide synthetase OS=Aspergillus clavatus (strain ATCC 1007 / CBS 513.65 / DSM 816 / NCTC 3887 / NRRL 1 / QM 1276 / 107) OX=344612 GN=ccsA PE=3 SV=1	Aspergillus_fijiensis__gene7792
Aspergillus_fijiensis__gene7908	1	2402	OTHER	100	BGC0002615__QBC75448.1	1.52e-12	28.9	OTHER	sp|Q8L3X9|KASM_ARATH	5.35e-54	36.8	sp|Q8L3X9|KASM_ARATH 3-oxoacyl-[acyl-carrier-protein] synthase, mitochondrial OS=Arabidopsis thaliana OX=3702 GN=KAS PE=1 SV=1	Aspergillus_fijiensis__gene7908
Aspergillus_fijiensis__gene7958	1	453	hr_pks	100	BGC0002729__EAA36364.1	6.12e-69	70.2	hr_pks	sp|Q7SHI6|SRDA_NEUCR	1.44e-65	70.2	sp|Q7SHI6|SRDA_NEUCR Highly reducing polyketide synthase srdA OS=Neurospora crassa (strain ATCC 24698 / 74-OR23-1A / CBS 708.71 / DSM 1257 / FGSC 987) OX=367110 GN=srdA PE=2 SV=1	Aspergillus_fijiensis__gene7958
Aspergillus_fijiensis__gene8356	1	8098	hr_pks	100	BGC0002525__BBU37368.1	1.66e-166	42	hr_pks	sp|S3D9F1|GLOL_GLAL2	0	32.2	sp|S3D9F1|GLOL_GLAL2 Highly reducing polyketide synthase gloL OS=Glarea lozoyensis (strain ATCC 20868 / MF5171) OX=1116229 GN=gloL PE=1 SV=1	Aspergillus_fijiensis__gene8356
Aspergillus_fijiensis__gene8404	1	7261	hr_pks	100	coniochaeta_ligniaria_nrrl_30616_gca_001879275__gene___CONLIGDRAFT_63350	1.13e-110	41.6	hr_pks	sp|A0A4P8DJV2|DMXL2_CRYX8	1.25e-119	28.4	sp|A0A4P8DJV2|DMXL2_CRYX8 Highly reducing polyketide synthase dmxL2 OS=Cryptosporiopsis sp. (strain 8999) OX=2572248 GN=dmxL2 PE=3 SV=1	Aspergillus_fijiensis__gene8404
Aspergillus_fijiensis__gene8411	1	8479	hr_pks	100	BGC0002729__EAA36364.1	5.34e-133	46.4	hr_pks	sp|Q7SHI6|SRDA_NEUCR	0	35.4	sp|Q7SHI6|SRDA_NEUCR Highly reducing polyketide synthase srdA OS=Neurospora crassa (strain ATCC 24698 / 74-OR23-1A / CBS 708.71 / DSM 1257 / FGSC 987) OX=367110 GN=srdA PE=2 SV=1	Aspergillus_fijiensis__gene8411
Aspergillus_fijiensis__gene8541	1	5801	OTHER	100	sp|A0A1L9WLD9|AACUL_ASPA1	0	98.2	OTHER	sp|A0A1L9WLD9|AACUL_ASPA1	0	94.8	sp|A0A1L9WLD9|AACUL_ASPA1 Atrochrysone carboxylic acid synthase AacuL OS=Aspergillus aculeatus (strain ATCC 16872 / CBS 172.66 / WB 5094) OX=690307 GN=AacuL PE=1 SV=1	Aspergillus_fijiensis__gene8541
Aspergillus_fijiensis__gene8587	1	8752	hr_pks	100	aspergillus_uvarum_cbs_121591_gca_003184745__gene___BO82DRAFT_343463	4.47e-286	49.2	hr_pks	sp|B3FWT3|HPM8_HYPSB	4.74e-160	36.3	sp|B3FWT3|HPM8_HYPSB Reducing polyketide synthase hmp8 OS=Hypomyces subiculosus OX=193393 GN=hpm8 PE=1 SV=1	Aspergillus_fijiensis__gene8587
Aspergillus_fijiensis__gene8598	1	12119	hr_pks	100	BGC0002210__FAA01291.1	0	97.2	hr_pks	sp|A0A2V5GX43|PYVA_ASPV1	0	95.9	sp|A0A2V5GX43|PYVA_ASPV1 Hybrid PKS-NRPS synthetase pyvA OS=Aspergillus violaceofuscus (strain CBS 115571) OX=1450538 GN=pyvA PE=3 SV=1	Aspergillus_fijiensis__gene8598
Aspergillus_fijiensis__gene8713	1	7698	hr_pks	99.6	BGC0002525__BBU37368.1	4.5e-196	48.7	hr_pks	sp|A0A6S5ZY48|G433_FUSSX	0	39.4	sp|A0A6S5ZY48|G433_FUSSX Highly reducing polyketide synthase g433 OS=Fusarium sp. OX=29916 GN=g433 PE=2 SV=1	Aspergillus_fijiensis__gene8713
Aspergillus_fijiensis__gene908	1	8504	hr_pks	100	BGC0001358__OAQ83760.1	9.86e-176	60.3	hr_pks	sp|A0A179H2I8|LCSB_PURLI	0	41.9	sp|A0A179H2I8|LCSB_PURLI Highly reducing polyketide synthase lcsB OS=Purpureocillium lilacinum OX=33203 GN=lcsB PE=2 SV=1	Aspergillus_fijiensis__gene908
Aspergillus_homomorphus__gene10188	1	11805	hr_pks	100	BGC0000977__BAK26562.1	0	61.5	hr_pks	sp|B6F209|CPAS_ASPOZ	0	50.2	sp|B6F209|CPAS_ASPOZ Cyclo-acetoacetyl-L-tryptophan synthase OS=Aspergillus oryzae OX=5062 GN=cpaA PE=1 SV=1	Aspergillus_homomorphus__gene10188
Aspergillus_homomorphus__gene10428__renamed0023	1	6682	hr_pks	100	Aspergillus_homomorphus__gene10428	0	99.5	hr_pks	sp|E5A7D9|PKS5_LEPMJ	0	44.4	sp|E5A7D9|PKS5_LEPMJ Highly reducing polyketide synthase pks5 OS=Leptosphaeria maculans (strain JN3 / isolate v23.1.3 / race Av1-4-5-6-7-8) OX=985895 GN=pks5 PE=2 SV=1	Aspergillus_homomorphus__gene10428
Aspergillus_homomorphus__gene10429	1	6996	OTHER	100	BGC0000027__AGN71604.1	0	61.2	OTHER	sp|Q5AUX7|DBAI_EMENI	0	49.1	sp|Q5AUX7|DBAI_EMENI Non-reducing polyketide synthase dbaI OS=Emericella nidulans (strain FGSC A4 / ATCC 38163 / CBS 112.46 / NRRL 194 / M139) OX=227321 GN=dbaI PE=1 SV=2	Aspergillus_homomorphus__gene10429
Aspergillus_homomorphus__gene10530	1	2312	OTHER	100	BGC0001244__AIW00670.1	1.3e-19	30.9	OTHER	sp|Q8L3X9|KASM_ARATH	4.09e-74	57.5	sp|Q8L3X9|KASM_ARATH 3-oxoacyl-[acyl-carrier-protein] synthase, mitochondrial OS=Arabidopsis thaliana OX=3702 GN=KAS PE=1 SV=1	Aspergillus_homomorphus__gene10530
Aspergillus_homomorphus__gene10739	1	7493	hr_pks	100	sp|P9WEQ0|OLCA_PENCN	0	57.3	hr_pks	sp|A0A1V6NYI6|VERA_PENPO	0	44.5	sp|A0A1V6NYI6|VERA_PENPO Highly reducing polyketide synthase verA OS=Penicillium polonicum OX=60169 GN=verA PE=3 SV=1	Aspergillus_homomorphus__gene10739
Aspergillus_homomorphus__gene10926	1	6442	OTHER	100	sp|Q5AUX7|DBAI_EMENI	6.86e-279	56.3	OTHER	sp|Q5AUX7|DBAI_EMENI	0	40.2	sp|Q5AUX7|DBAI_EMENI Non-reducing polyketide synthase dbaI OS=Emericella nidulans (strain FGSC A4 / ATCC 38163 / CBS 112.46 / NRRL 194 / M139) OX=227321 GN=dbaI PE=1 SV=2	Aspergillus_homomorphus__gene10926
Aspergillus_homomorphus__gene11128	1	378	hr_pks	99.1	coniochaeta_ligniaria_nrrl_30616_gca_001879275__gene___CONLIGDRAFT_63350	9.15e-44	60.3	hr_pks	sp|A0A1R3RGK0|OTAA_ASPC5	5.27e-33	52.8	sp|A0A1R3RGK0|OTAA_ASPC5 Highly reducing polyketide synthase otaA OS=Aspergillus carbonarius (strain ITEM 5010) OX=602072 GN=otaA PE=2 SV=1	Aspergillus_homomorphus__gene11128
Aspergillus_homomorphus__gene11169	1	6867	OUTLIER	*	None	None	None	None	sp|Q5AV07|ATNM_EMENI	0	79.4	sp|Q5AV07|ATNM_EMENI Fatty acid synthase beta subunit aflB OS=Emericella nidulans (strain FGSC A4 / ATCC 38163 / CBS 112.46 / NRRL 194 / M139) OX=227321 GN=atnM PE=2 SV=1	Aspergillus_homomorphus__gene11169
Aspergillus_homomorphus__gene11282	1	8085	hr_pks	100	BGC0000098__ABA02240.1	9.44e-121	48	hr_pks	sp|Q3S2U6|MOKB_MONPI	0	55.8	sp|Q3S2U6|MOKB_MONPI Lovastatin diketide synthase mokB OS=Monascus pilosus OX=89488 GN=mokB PE=1 SV=1	Aspergillus_homomorphus__gene11282
Aspergillus_homomorphus__gene11466	1	6311	OUTLIER	*	None	None	None	None	sp|P34229|FAS1_YARLI	0	60	sp|P34229|FAS1_YARLI Fatty acid synthase subunit beta OS=Yarrowia lipolytica (strain CLIB 122 / E 150) OX=284591 GN=FAS1 PE=3 SV=2	Aspergillus_homomorphus__gene11466
Aspergillus_homomorphus__gene11572	1	3083	OTHER	100	BGC0000030__CCT67991.1	1.72e-191	54.7	OTHER	sp|S0DZM7|BIK1_GIBF5	3.23e-220	49.4	sp|S0DZM7|BIK1_GIBF5 Bikaverin polyketide synthase bik1 OS=Gibberella fujikuroi (strain CBS 195.34 / IMI 58289 / NRRL A-6831) OX=1279085 GN=bik1 PE=1 SV=1	Aspergillus_homomorphus__gene11572
Aspergillus_homomorphus__gene1570	1	1534	OTHER	100	BGC0002212__ESK96613.1	4.26e-14	25.5	OTHER	sp|P71019|FABD_BACSU	3.99e-38	34.4	sp|P71019|FABD_BACSU Malonyl CoA-acyl carrier protein transacylase OS=Bacillus subtilis (strain 168) OX=224308 GN=fabD PE=3 SV=2	Aspergillus_homomorphus__gene1570
Aspergillus_homomorphus__gene1648	1	6364	OTHER	100	BGC0002253__QKG86295.1	6.76e-301	52.9	OTHER	sp|A0A443HK81|VDTA1_BYSSP	0	44.7	sp|A0A443HK81|VDTA1_BYSSP Non-reducing polyketide synthase VdtA OS=Byssochlamys spectabilis OX=264951 GN=VdtA PE=1 SV=1	Aspergillus_homomorphus__gene1648
Aspergillus_homomorphus__gene2168	1	5454	OTHER	100	sp|A0A1L9WLD9|AACUL_ASPA1	0	95.3	OTHER	sp|A0A1L9WLD9|AACUL_ASPA1	0	92.7	sp|A0A1L9WLD9|AACUL_ASPA1 Atrochrysone carboxylic acid synthase AacuL OS=Aspergillus aculeatus (strain ATCC 16872 / CBS 172.66 / WB 5094) OX=690307 GN=AacuL PE=1 SV=1	Aspergillus_homomorphus__gene2168
Aspergillus_homomorphus__gene2857	1	8440	hr_pks	100	Aspergillus_homomorphus__gene10428	1.29e-206	51.9	hr_pks	sp|E5A7D9|PKS5_LEPMJ	0	45.5	sp|E5A7D9|PKS5_LEPMJ Highly reducing polyketide synthase pks5 OS=Leptosphaeria maculans (strain JN3 / isolate v23.1.3 / race Av1-4-5-6-7-8) OX=985895 GN=pks5 PE=2 SV=1	Aspergillus_homomorphus__gene2857
Aspergillus_homomorphus__gene3571	1	8650	hr_pks	100	aspergillus_uvarum_cbs_121591_gca_003184745__gene___BO82DRAFT_343463	6.43e-247	56	hr_pks	sp|G4NEB1|NEC1_MAGO7	5.11e-123	32.4	sp|G4NEB1|NEC1_MAGO7 Highly reducing polyketide synthase NEC1 OS=Magnaporthe oryzae (strain 70-15 / ATCC MYA-4617 / FGSC 8958) OX=242507 GN=NEC1 PE=1 SV=1	Aspergillus_homomorphus__gene3571
Aspergillus_homomorphus__gene3843	1	2282	hr_pks	100	sp|A0A0N0DCA3|DEP5_FUSLA	4.94e-146	62.4	hr_pks	sp|D2E9X0|DEP5_ALTBR	7.01e-136	54.2	sp|D2E9X0|DEP5_ALTBR Reducing polyketide synthase DEP5 OS=Alternaria brassicicola OX=29001 GN=DEP5 PE=2 SV=1	Aspergillus_homomorphus__gene3843
Aspergillus_homomorphus__gene4169	1	9160	hr_pks	100	BGC0001358__OAQ83765.1	4.92e-133	58.3	hr_pks	sp|S3D9F1|GLOL_GLAL2	2e-265	35.2	sp|S3D9F1|GLOL_GLAL2 Highly reducing polyketide synthase gloL OS=Glarea lozoyensis (strain ATCC 20868 / MF5171) OX=1116229 GN=gloL PE=1 SV=1	Aspergillus_homomorphus__gene4169
Aspergillus_homomorphus__gene4371	1	7899	hr_pks	100	BGC0001866__XP_028481819.1	3.34e-319	59.8	hr_pks	sp|A0A443HK66|VDTX1_BYSSP	0	48.6	sp|A0A443HK66|VDTX1_BYSSP Highly reducing polyketide synthase VdtX OS=Byssochlamys spectabilis OX=264951 GN=VdtX PE=3 SV=1	Aspergillus_homomorphus__gene4371
Aspergillus_homomorphus__gene4449	1	5333	OTHER	100	BGC0002229__OJJ97578.1	0	93.9	OTHER	sp|A0A1L9WN37|ACUA_ASPA1	0	91.7	sp|A0A1L9WN37|ACUA_ASPA1 6-methylsalicylic acid synthase acuA OS=Aspergillus aculeatus (strain ATCC 16872 / CBS 172.66 / WB 5094) OX=690307 GN=acuA PE=1 SV=1	Aspergillus_homomorphus__gene4449
Aspergillus_homomorphus__gene4648	1	8058	hr_pks	100	sp|A0A1W5T1T1|POXF_PENOX	0	63.3	hr_pks	sp|A0A1W5T1T1|POXF_PENOX	0	57.9	sp|A0A1W5T1T1|POXF_PENOX Highly reducing polyketide synthase poxF OS=Penicillium oxalicum OX=69781 GN=poxF PE=2 SV=1	Aspergillus_homomorphus__gene4648
Aspergillus_homomorphus__gene5134	1	306	hr_pks	97.3	BGC0001141__AIA58899.1	2.07e-25	47.3	hr_pks	sp|A0A068ABB7|BREF7_EUPBR	5.35e-26	49.5	sp|A0A068ABB7|BREF7_EUPBR Highly reducing polyketide synthase OS=Eupenicillium brefeldianum OX=1131482 GN=Bref-PKS PE=1 SV=1	Aspergillus_homomorphus__gene5134
Aspergillus_homomorphus__gene5135	1	8793	hr_pks	99.7	BGC0001141__AIA58899.1	6.28e-39	52.6	hr_pks	sp|A0A0U4ZX08|DRTA_ASPCI	1.45e-32	51.1	sp|A0A0U4ZX08|DRTA_ASPCI Low-reducing polyketide synthase drtA OS=Aspergillus calidoustus OX=454130 GN=drtA PE=1 SV=1	Aspergillus_homomorphus__gene5135
Aspergillus_homomorphus__gene5201	1	7441	hr_pks	100	BGC0001141__AIA58899.1	1.01e-134	51.3	hr_pks	sp|A0A068ABB7|BREF7_EUPBR	0	41.6	sp|A0A068ABB7|BREF7_EUPBR Highly reducing polyketide synthase OS=Eupenicillium brefeldianum OX=1131482 GN=Bref-PKS PE=1 SV=1	Aspergillus_homomorphus__gene5201
Aspergillus_homomorphus__gene5397	1	8190	hr_pks	100	sp|P0DUK1|PSPA_PENSO	2.61e-73	33.5	hr_pks	sp|S3D9F1|GLOL_GLAL2	8.69e-240	29	sp|S3D9F1|GLOL_GLAL2 Highly reducing polyketide synthase gloL OS=Glarea lozoyensis (strain ATCC 20868 / MF5171) OX=1116229 GN=gloL PE=1 SV=1	Aspergillus_homomorphus__gene5397
Aspergillus_homomorphus__gene5410	1	5586	OTHER	100	BGC0001403__EAL89339.1	0	81	OTHER	sp|Q4WQZ5|TPCC_ASPFU	0	77.6	sp|Q4WQZ5|TPCC_ASPFU Atrochrysone carboxylic acid synthase OS=Neosartorya fumigata (strain ATCC MYA-4609 / Af293 / CBS 101355 / FGSC A1100) OX=330879 GN=tpcC PE=2 SV=1	Aspergillus_homomorphus__gene5410
Aspergillus_homomorphus__gene5498	1	7534	hr_pks	100	sp|P9WEQ0|OLCA_PENCN	0	60.4	hr_pks	sp|P9WEQ0|OLCA_PENCN	0	40.4	sp|P9WEQ0|OLCA_PENCN Non-reducing polyketide synthase olcA OS=Penicillium canescens OX=5083 GN=olcA PE=3 SV=1	Aspergillus_homomorphus__gene5498
Aspergillus_homomorphus__gene6151	1	7775	OTHER	100	sp|Q5B7U4|PKIA_EMENI	0	61.4	OTHER	sp|Q5B7U4|PKIA_EMENI	0	56.6	sp|Q5B7U4|PKIA_EMENI Non-reducing polyketide synthase pkiA OS=Emericella nidulans (strain FGSC A4 / ATCC 38163 / CBS 112.46 / NRRL 194 / M139) OX=227321 GN=pkiA PE=1 SV=1	Aspergillus_homomorphus__gene6151
Aspergillus_homomorphus__gene6154	1	6436	OUTLIER	*	None	None	None	None	sp|A0A1U8QK63|PKIC_EMENI	0	53.7	sp|A0A1U8QK63|PKIC_EMENI Fatty acid synthase beta subunit pkiC OS=Emericella nidulans (strain FGSC A4 / ATCC 38163 / CBS 112.46 / NRRL 194 / M139) OX=227321 GN=pkiC PE=1 SV=1	Aspergillus_homomorphus__gene6154
Aspergillus_homomorphus__gene6485	1	12489	hr_pks	100	sp|A0A0E4AZP0|FSA1_FUSSF	8.57e-236	54.1	hr_pks	sp|S0DS59|EQXS_GIBF5	0	41.8	sp|S0DS59|EQXS_GIBF5 Trichosetin synthetase PKS-NRPS1 OS=Gibberella fujikuroi (strain CBS 195.34 / IMI 58289 / NRRL A-6831) OX=1279085 GN=PKS-NRPS1 PE=2 SV=1	Aspergillus_homomorphus__gene6485
Aspergillus_homomorphus__gene651	1	8810	hr_pks	100	aspergillus_tubingensis_cbs_134_48_gca_001890745__gene___ASPTUDRAFT_927185	9.69e-99	29.5	hr_pks	sp|Q5KTM9|ALT5_ALTSO	1.08e-104	25.1	sp|Q5KTM9|ALT5_ALTSO Highly reducing polyketide synthase alt5 OS=Alternaria solani OX=48100 GN=alt5 PE=1 SV=1	Aspergillus_homomorphus__gene651
Aspergillus_homomorphus__gene7429	1	7532	hr_pks	100	sp|P9WEQ0|OLCA_PENCN	0	57.2	hr_pks	sp|A0A1V6NYI6|VERA_PENPO	0	43.9	sp|A0A1V6NYI6|VERA_PENPO Highly reducing polyketide synthase verA OS=Penicillium polonicum OX=60169 GN=verA PE=3 SV=1	Aspergillus_homomorphus__gene7429
Aspergillus_homomorphus__gene8369	1	8147	OTHER	100	BGC0002255__AMJ52084.1	0	62.5	OTHER	sp|Q0CF73|AZPB2_ASPTN	0	49.9	sp|Q0CF73|AZPB2_ASPTN Non-reducing polyketide synthase ATEG_07661 OS=Aspergillus terreus (strain NIH 2624 / FGSC A1156) OX=341663 GN=ATEG_07661 PE=1 SV=1	Aspergillus_homomorphus__gene8369
Aspergillus_homomorphus__gene852	1	7687	OTHER	100	BGC0001242__CCE67070.1	0	68.6	OTHER	sp|S0DTP6|FSR1_GIBF5	0	64.3	sp|S0DTP6|FSR1_GIBF5 Non-reducing polyketide synthase fsr1 OS=Gibberella fujikuroi (strain CBS 195.34 / IMI 58289 / NRRL A-6831) OX=1279085 GN=FSR1 PE=2 SV=1	Aspergillus_homomorphus__gene852
Aspergillus_homomorphus__gene8838	1	6840	OTHER	100	sp|A0A1L9UCG2|ALBA_ASPBC	0	86.1	OTHER	sp|A0A1L9UCG2|ALBA_ASPBC	0	74.8	sp|A0A1L9UCG2|ALBA_ASPBC Non-reducing polyketide synthase albA OS=Aspergillus brasiliensis (strain CBS 101740 / IMI 381727 / IBT 21946) OX=767769 GN=albA PE=3 SV=1	Aspergillus_homomorphus__gene8838
Aspergillus_homomorphus__gene9045	1	12670	hr_pks	100	BGC0002197__QBK15049.1	6.86e-288	67.8	hr_pks	sp|A0A481WNP4|TRAA_PENCR	0	58.9	sp|A0A481WNP4|TRAA_PENCR Hybrid PKS-NRPS synthetase traA OS=Penicillium crustosum OX=36656 GN=traA PE=3 SV=1	Aspergillus_homomorphus__gene9045
Aspergillus_homomorphus__gene9273	1	8070	hr_pks	100	BGC0001866__XP_028481819.1	1.95e-150	45.7	hr_pks	sp|S3D9F1|GLOL_GLAL2	4.02e-191	35.1	sp|S3D9F1|GLOL_GLAL2 Highly reducing polyketide synthase gloL OS=Glarea lozoyensis (strain ATCC 20868 / MF5171) OX=1116229 GN=gloL PE=1 SV=1	Aspergillus_homomorphus__gene9273
Aspergillus_homomorphus__gene9587	1	7966	hr_pks	100	talaromyces_islandicus_gca_000985935__gene___PISL3812_01117	1.46e-277	55	hr_pks	sp|Q5KTM9|ALT5_ALTSO	0	32.8	sp|Q5KTM9|ALT5_ALTSO Highly reducing polyketide synthase alt5 OS=Alternaria solani OX=48100 GN=alt5 PE=1 SV=1	Aspergillus_homomorphus__gene9587
Aspergillus_ibericus__gene10720	1	8813	hr_pks	100	BGC0001373__BAV32159.1	2.28e-236	49	hr_pks	sp|Q50LG3|AFT91_ALTAL	3.65e-309	39.6	sp|Q50LG3|AFT91_ALTAL Highly reducing polyketide synthase AFT9-1 OS=Alternaria alternata OX=5599 GN=AFT9-1 PE=3 SV=1	Aspergillus_ibericus__gene10720
Aspergillus_ibericus__gene11024	1	8637	hr_pks	100	aspergillus_vadensis_cbs_113365_gca_003184925__gene___BO88DRAFT_454246	1.82e-216	52.5	hr_pks	sp|G4NEB1|NEC1_MAGO7	1.44e-135	29.4	sp|G4NEB1|NEC1_MAGO7 Highly reducing polyketide synthase NEC1 OS=Magnaporthe oryzae (strain 70-15 / ATCC MYA-4617 / FGSC 8958) OX=242507 GN=NEC1 PE=1 SV=1	Aspergillus_ibericus__gene11024
Aspergillus_ibericus__gene11151	1	12779	hr_pks	100	sp|A0A0F7GFS4|TASS_HAPIR	5.07e-201	53	hr_pks	sp|A0A0F7GFS4|TASS_HAPIR	0	53.3	sp|A0A0F7GFS4|TASS_HAPIR Hybrid PKS-NRPS synthetase tasS OS=Hapsidospora irregularis OX=95324 GN=tasS PE=1 SV=1	Aspergillus_ibericus__gene11151
Aspergillus_ibericus__gene11449	1	12178	hr_pks	100	BGC0002210__FAA01291.1	0	72	hr_pks	sp|A0A2V5GX43|PYVA_ASPV1	0	61.8	sp|A0A2V5GX43|PYVA_ASPV1 Hybrid PKS-NRPS synthetase pyvA OS=Aspergillus violaceofuscus (strain CBS 115571) OX=1450538 GN=pyvA PE=3 SV=1	Aspergillus_ibericus__gene11449
Aspergillus_ibericus__gene1548	1	2176	OTHER	100	BGC0002615__QBC75448.1	1.54e-11	30.5	OTHER	sp|Q0VCA7|OXSM_BOVIN	1.72e-43	34.9	sp|Q0VCA7|OXSM_BOVIN 3-oxoacyl-[acyl-carrier-protein] synthase, mitochondrial OS=Bos taurus OX=9913 GN=OXSM PE=2 SV=1	Aspergillus_ibericus__gene1548
Aspergillus_ibericus__gene1689	1	7731	hr_pks	100	BGC0001141__AIA58899.1	3.57e-132	50.8	hr_pks	sp|A0A068ABB7|BREF7_EUPBR	7.83e-287	40	sp|A0A068ABB7|BREF7_EUPBR Highly reducing polyketide synthase OS=Eupenicillium brefeldianum OX=1131482 GN=Bref-PKS PE=1 SV=1	Aspergillus_ibericus__gene1689
Aspergillus_ibericus__gene1801	1	303	hr_pks	99	Ophiocordyceps_sinensis__gene-G6O67_007912	4.46e-24	67.9	hr_pks	sp|Q7TXL9|PPSB_MYCBO	7.82e-17	60.8	sp|Q7TXL9|PPSB_MYCBO Phenolphthiocerol/phthiocerol polyketide synthase subunit B OS=Mycobacterium bovis (strain ATCC BAA-935 / AF2122/97) OX=233413 GN=ppsB PE=1 SV=1	Aspergillus_ibericus__gene1801
Aspergillus_ibericus__gene1802	1	192	hr_pks	99.8	Ophiocordyceps_sinensis__gene-G6O67_007912	7.65e-28	71.9	hr_pks	sp|A0A0U5GK88|AUSV_ASPCI	2.11e-16	53.1	sp|A0A0U5GK88|AUSV_ASPCI Highly reducing polyketide synthase ausV OS=Aspergillus calidoustus OX=454130 GN=ausV PE=1 SV=1	Aspergillus_ibericus__gene1802
Aspergillus_ibericus__gene1989	1	8031	hr_pks	100	Chlorociboria_aeruginascens__gene-B7494_g1069	2.68e-154	47.7	hr_pks	sp|W7MT31|FUB1_GIBM7	8.38e-287	36.9	sp|W7MT31|FUB1_GIBM7 Reducing polyketide synthase FUB1 OS=Gibberella moniliformis (strain M3125 / FGSC 7600) OX=334819 GN=FUB1 PE=1 SV=1	Aspergillus_ibericus__gene1989
Aspergillus_ibericus__gene2153	1	6896	OUTLIER	*	None	None	None	None	sp|P34229|FAS1_YARLI	0	59.8	sp|P34229|FAS1_YARLI Fatty acid synthase subunit beta OS=Yarrowia lipolytica (strain CLIB 122 / E 150) OX=284591 GN=FAS1 PE=3 SV=2	Aspergillus_ibericus__gene2153
Aspergillus_ibericus__gene2579	1	12315	hr_pks	100	sp|A0A0G0AID6|THNA_TRIHA	1.85e-184	67.2	hr_pks	sp|A0A0G0AID6|THNA_TRIHA	0	44.6	sp|A0A0G0AID6|THNA_TRIHA Hybrid PKS-NRPS synthetase thnA OS=Trichoderma harzianum OX=5544 GN=thnA PE=1 SV=1	Aspergillus_ibericus__gene2579
Aspergillus_ibericus__gene2602	1	1686	OTHER	100	BGC0001446__EED57518.1	1.64e-79	87.7	OTHER	sp|B8MYS6|PKS27_ASPFN	2.01e-171	53.4	sp|B8MYS6|PKS27_ASPFN Non-reducing polyketide synthase pks27 OS=Aspergillus flavus (strain ATCC 200026 / FGSC A1120 / IAM 13836 / NRRL 3357 / JCM 12722 / SRRC 167) OX=332952 GN=pks27 PE=1 SV=1	Aspergillus_ibericus__gene2602
Aspergillus_ibericus__gene3040	1	9155	OTHER	100	BGC0002734__EAU35431.1	9.31e-243	47.3	OTHER	sp|Q0CRQ5|5MOAS_ASPTN	0	39.4	sp|Q0CRQ5|5MOAS_ASPTN 5-methylorsellinic acid synthase OS=Aspergillus terreus (strain NIH 2624 / FGSC A1156) OX=341663 GN=ATEG_03629 PE=1 SV=1	Aspergillus_ibericus__gene3040
Aspergillus_ibericus__gene3056	1	5777	hr_pks	99.5	BGC0001358__OAQ83765.1	1.67e-37	50.4	hr_pks	sp|S3D9F1|GLOL_GLAL2	2.72e-121	31.2	sp|S3D9F1|GLOL_GLAL2 Highly reducing polyketide synthase gloL OS=Glarea lozoyensis (strain ATCC 20868 / MF5171) OX=1116229 GN=gloL PE=1 SV=1	Aspergillus_ibericus__gene3056
Aspergillus_ibericus__gene3173	1	6417	OUTLIER	*	None	None	None	None	sp|Q2TXG3|ORYB_ASPOR	0	45.9	sp|Q2TXG3|ORYB_ASPOR Fatty acid synthase subunit beta OS=Aspergillus oryzae (strain ATCC 42149 / RIB 40) OX=510516 GN=oryfasB PE=3 SV=1	Aspergillus_ibericus__gene3173
Aspergillus_ibericus__gene3265	1	8305	hr_pks	100	oidiodendron_maius_zn_gca_000827325__gene___OIDMADRAFT_44032	2.94e-83	39.7	hr_pks	sp|A0A345BJP0|CLZ2_COCLU	1.78e-105	32.3	sp|A0A345BJP0|CLZ2_COCLU Squalestatin tetraketide synthase clz2 OS=Cochliobolus lunatus OX=5503 GN=clz2 PE=3 SV=1	Aspergillus_ibericus__gene3265
Aspergillus_ibericus__gene3804	1	7919	hr_pks	100	sp|Q0CS88|TAZB_ASPTN	1.02e-160	48.6	hr_pks	sp|A0A345BJP0|CLZ2_COCLU	4.74e-238	33.5	sp|A0A345BJP0|CLZ2_COCLU Squalestatin tetraketide synthase clz2 OS=Cochliobolus lunatus OX=5503 GN=clz2 PE=3 SV=1	Aspergillus_ibericus__gene3804
Aspergillus_ibericus__gene3833	1	12446	hr_pks	100	BGC0000992__AAV66110.2	2.81e-243	47	hr_pks	sp|Q5SBL6|FSDS_FUSHE	0	34.5	sp|Q5SBL6|FSDS_FUSHE Fusaridione A synthetase fsdS OS=Fusarium heterosporum OX=42747 GN=fsdS PE=3 SV=2	Aspergillus_ibericus__gene3833
Aspergillus_ibericus__gene421	1	7455	hr_pks	100	sp|P9WEQ0|OLCA_PENCN	0	58.2	hr_pks	sp|A0A1V6NYI6|VERA_PENPO	0	44.9	sp|A0A1V6NYI6|VERA_PENPO Highly reducing polyketide synthase verA OS=Penicillium polonicum OX=60169 GN=verA PE=3 SV=1	Aspergillus_ibericus__gene421
Aspergillus_ibericus__gene4287	1	7399	hr_pks	100	sp|A0A0N0DCA3|DEP5_FUSLA	4.44e-93	40.7	hr_pks	sp|D2E9X0|DEP5_ALTBR	5.21e-162	29.5	sp|D2E9X0|DEP5_ALTBR Reducing polyketide synthase DEP5 OS=Alternaria brassicicola OX=29001 GN=DEP5 PE=2 SV=1	Aspergillus_ibericus__gene4287
Aspergillus_ibericus__gene4686	1	7156	OTHER	100	sp|A0A1L9UCG2|ALBA_ASPBC	0	94.4	OTHER	sp|A0A1L9UCG2|ALBA_ASPBC	0	88.7	sp|A0A1L9UCG2|ALBA_ASPBC Non-reducing polyketide synthase albA OS=Aspergillus brasiliensis (strain CBS 101740 / IMI 381727 / IBT 21946) OX=767769 GN=albA PE=3 SV=1	Aspergillus_ibericus__gene4686
Aspergillus_ibericus__gene567	1	1475	OTHER	100	BGC0002212__ESK96613.1	1.93e-12	24.8	OTHER	sp|P71019|FABD_BACSU	8.07e-40	34.7	sp|P71019|FABD_BACSU Malonyl CoA-acyl carrier protein transacylase OS=Bacillus subtilis (strain 168) OX=224308 GN=fabD PE=3 SV=2	Aspergillus_ibericus__gene567
Aspergillus_ibericus__gene6475	1	6622	OTHER	100	BGC0001578__EED21099.1	0	67.1	OTHER	sp|A0A142C799|PHNA_PENHR	0	48.8	sp|A0A142C799|PHNA_PENHR Non-reducing polyketide synthase phnA OS=Penicillium herquei OX=69774 GN=phnA PE=1 SV=1	Aspergillus_ibericus__gene6475
Aspergillus_ibericus__gene6525	1	8192	hr_pks	100	BGC0002525__BBU37368.1	1.34e-114	33.1	hr_pks	sp|A0A6S5ZY48|G433_FUSSX	3.65e-241	34.3	sp|A0A6S5ZY48|G433_FUSSX Highly reducing polyketide synthase g433 OS=Fusarium sp. OX=29916 GN=g433 PE=2 SV=1	Aspergillus_ibericus__gene6525
Aspergillus_ibericus__gene6640	1	8208	hr_pks	100	aspergillus_heteromorphus_cbs_117_55_gca_003184545__gene___BO70DRAFT_422207	3.47e-160	80.4	hr_pks	sp|N4WHE3|PKS1_COCH4	4.68e-308	34.3	sp|N4WHE3|PKS1_COCH4 Reducing polyketide synthase PKS1 OS=Cochliobolus heterostrophus (strain C4 / ATCC 48331 / race T) OX=665024 GN=PKS1 PE=3 SV=1	Aspergillus_ibericus__gene6640
Aspergillus_ibericus__gene7282	1	7096	hr_pks	100	BGC0002729__EAA36364.1	6.55e-219	51.2	hr_pks	sp|Q7SHI6|SRDA_NEUCR	0	41	sp|Q7SHI6|SRDA_NEUCR Highly reducing polyketide synthase srdA OS=Neurospora crassa (strain ATCC 24698 / 74-OR23-1A / CBS 708.71 / DSM 1257 / FGSC 987) OX=367110 GN=srdA PE=2 SV=1	Aspergillus_ibericus__gene7282
Aspergillus_ibericus__gene7562	1	7967	OTHER	100	BGC0000037__CBF69451.1	8.46e-307	57.7	OTHER	sp|Q5AZ32|PKBA_EMENI	0	51.6	sp|Q5AZ32|PKBA_EMENI Non-reducing polyketide synthase pkbA OS=Emericella nidulans (strain FGSC A4 / ATCC 38163 / CBS 112.46 / NRRL 194 / M139) OX=227321 GN=pkbA PE=1 SV=1	Aspergillus_ibericus__gene7562
Aspergillus_ibericus__gene7574	1	7524	hr_pks	100	BGC0002729__EAA36364.1	5.48e-313	54	hr_pks	sp|Q7SHI6|SRDA_NEUCR	0	44.9	sp|Q7SHI6|SRDA_NEUCR Highly reducing polyketide synthase srdA OS=Neurospora crassa (strain ATCC 24698 / 74-OR23-1A / CBS 708.71 / DSM 1257 / FGSC 987) OX=367110 GN=srdA PE=2 SV=1	Aspergillus_ibericus__gene7574
Aspergillus_ibericus__gene8179	1	11901	hr_pks	100	BGC0002210__FAA01291.1	0	66.7	hr_pks	sp|A0A2V5GX43|PYVA_ASPV1	0	55.1	sp|A0A2V5GX43|PYVA_ASPV1 Hybrid PKS-NRPS synthetase pyvA OS=Aspergillus violaceofuscus (strain CBS 115571) OX=1450538 GN=pyvA PE=3 SV=1	Aspergillus_ibericus__gene8179
Aspergillus_ibericus__gene8217	1	6352	OUTLIER	*	None	None	None	None	sp|Q2TXG3|ORYB_ASPOR	0	45.3	sp|Q2TXG3|ORYB_ASPOR Fatty acid synthase subunit beta OS=Aspergillus oryzae (strain ATCC 42149 / RIB 40) OX=510516 GN=oryfasB PE=3 SV=1	Aspergillus_ibericus__gene8217
Aspergillus_ibericus__gene8563	1	12307	hr_pks	99.8	BGC0001857__QBE85649.1	4.33e-222	53.3	hr_pks	sp|A0A0G0AID6|THNA_TRIHA	0	31.8	sp|A0A0G0AID6|THNA_TRIHA Hybrid PKS-NRPS synthetase thnA OS=Trichoderma harzianum OX=5544 GN=thnA PE=1 SV=1	Aspergillus_ibericus__gene8563
Aspergillus_ibericus__gene9365	1	8305	OTHER	100	sp|Q5B7U4|PKIA_EMENI	0	64.2	OTHER	sp|Q5B7U4|PKIA_EMENI	0	57.8	sp|Q5B7U4|PKIA_EMENI Non-reducing polyketide synthase pkiA OS=Emericella nidulans (strain FGSC A4 / ATCC 38163 / CBS 112.46 / NRRL 194 / M139) OX=227321 GN=pkiA PE=1 SV=1	Aspergillus_ibericus__gene9365
Aspergillus_ibericus__gene9742	1	5349	OTHER	100	BGC0001923__BBF25315.1	0	61.3	OTHER	sp|A0A455R5P9|ASCC_ACREG	0	52.2	sp|A0A455R5P9|ASCC_ACREG Non-reducing polyketide synthase ascC OS=Acremonium egyptiacum OX=749675 GN=ascC PE=1 SV=1	Aspergillus_ibericus__gene9742
Aspergillus_kawachii__gene10070	1	11940	hr_pks	100	BGC0001857__QBE85649.1	0	56.2	hr_pks	sp|A0A411L027|BUAA_ASPBU	0	39.8	sp|A0A411L027|BUAA_ASPBU Hybrid PKS-NRPS synthetase buaA OS=Aspergillus burnettii OX=2508778 GN=buaA PE=3 SV=1	Aspergillus_kawachii__gene10070
Aspergillus_kawachii__gene10207	1	11959	hr_pks	100	BGC0002210__FAA01291.1	0	71.9	hr_pks	sp|A0A2V5GX43|PYVA_ASPV1	0	60.8	sp|A0A2V5GX43|PYVA_ASPV1 Hybrid PKS-NRPS synthetase pyvA OS=Aspergillus violaceofuscus (strain CBS 115571) OX=1450538 GN=pyvA PE=3 SV=1	Aspergillus_kawachii__gene10207
Aspergillus_kawachii__gene10538	1	7846	OTHER	100	sp|Q5B7U4|PKIA_EMENI	0	62.1	OTHER	sp|Q5B7U4|PKIA_EMENI	0	54.2	sp|Q5B7U4|PKIA_EMENI Non-reducing polyketide synthase pkiA OS=Emericella nidulans (strain FGSC A4 / ATCC 38163 / CBS 112.46 / NRRL 194 / M139) OX=227321 GN=pkiA PE=1 SV=1	Aspergillus_kawachii__gene10538
Aspergillus_kawachii__gene10542	1	6267	OUTLIER	*	None	None	None	None	sp|A0A1U8QK63|PKIC_EMENI	0	51.7	sp|A0A1U8QK63|PKIC_EMENI Fatty acid synthase beta subunit pkiC OS=Emericella nidulans (strain FGSC A4 / ATCC 38163 / CBS 112.46 / NRRL 194 / M139) OX=227321 GN=pkiC PE=1 SV=1	Aspergillus_kawachii__gene10542
Aspergillus_kawachii__gene10638	1	8509	hr_pks	100	aspergillus_uvarum_cbs_121591_gca_003184745__gene___BO82DRAFT_343463	1.13e-86	32.5	hr_pks	sp|A0A0S6XH49|FRBB_BLOB1	5.17e-167	26.1	sp|A0A0S6XH49|FRBB_BLOB1 Highly reducing polyketide synthase frbB OS=Fungal sp. (strain No.11243) OX=1603295 GN=frbB PE=1 SV=1	Aspergillus_kawachii__gene10638
Aspergillus_kawachii__gene10703	1	4692	OTHER	100	BGC0001266__ADM79459.1	2.54e-103	29.8	OTHER	sp|E9KMQ2|GRA1_CLAGR	2.68e-225	31.3	sp|E9KMQ2|GRA1_CLAGR Non-reducing polyketide synthase PKS16 OS=Cladonia grayi OX=27339 GN=PKS16 PE=2 SV=1	Aspergillus_kawachii__gene10703
Aspergillus_kawachii__gene10775	1	7712	hr_pks	99.1	BGC0002525__BBU37368.1	4.8e-272	50.6	hr_pks	sp|A0A6S5ZY48|G433_FUSSX	0	44.4	sp|A0A6S5ZY48|G433_FUSSX Highly reducing polyketide synthase g433 OS=Fusarium sp. OX=29916 GN=g433 PE=2 SV=1	Aspergillus_kawachii__gene10775
Aspergillus_kawachii__gene10864	1	6326	OUTLIER	*	None	None	None	None	sp|P34229|FAS1_YARLI	0	59.6	sp|P34229|FAS1_YARLI Fatty acid synthase subunit beta OS=Yarrowia lipolytica (strain CLIB 122 / E 150) OX=284591 GN=FAS1 PE=3 SV=2	Aspergillus_kawachii__gene10864
Aspergillus_kawachii__gene1392	1	7454	hr_pks	100	BGC0001866__XP_028481819.1	0	70.8	hr_pks	sp|A0A443HK66|VDTX1_BYSSP	0	62.3	sp|A0A443HK66|VDTX1_BYSSP Highly reducing polyketide synthase VdtX OS=Byssochlamys spectabilis OX=264951 GN=VdtX PE=3 SV=1	Aspergillus_kawachii__gene1392
Aspergillus_kawachii__gene1404	1	2877	hr_pks	100	BGC0002139__KAF5858310.1	0	78.6	hr_pks	sp|I1S166|FSL1_GIBZE	0	55.6	sp|I1S166|FSL1_GIBZE Fusarielin synthase FSL1 OS=Gibberella zeae (strain ATCC MYA-4620 / CBS 123657 / FGSC 9075 / NRRL 31084 / PH-1) OX=229533 GN=FSL1 PE=2 SV=1	Aspergillus_kawachii__gene1404
Aspergillus_kawachii__gene1714	1	7845	hr_pks	100	BGC0000062__AAD43562.2	8.9e-301	57.8	hr_pks	sp|S3D9F1|GLOL_GLAL2	0	40.2	sp|S3D9F1|GLOL_GLAL2 Highly reducing polyketide synthase gloL OS=Glarea lozoyensis (strain ATCC 20868 / MF5171) OX=1116229 GN=gloL PE=1 SV=1	Aspergillus_kawachii__gene1714
Aspergillus_kawachii__gene1716	1	7400	hr_pks	100	sp|A0A0N0DCA3|DEP5_FUSLA	5.42e-114	52.5	hr_pks	sp|D2E9X0|DEP5_ALTBR	4.24e-148	25.3	sp|D2E9X0|DEP5_ALTBR Reducing polyketide synthase DEP5 OS=Alternaria brassicicola OX=29001 GN=DEP5 PE=2 SV=1	Aspergillus_kawachii__gene1716
Aspergillus_kawachii__gene1945	1	7452	hr_pks	100	Aspergillus_fijiensis__gene649	2.21e-213	46.9	hr_pks	sp|A0A0A2JW91|CNSI_PENEN	0	39.3	sp|A0A0A2JW91|CNSI_PENEN Highly reducing polyketide synthase cnsI OS=Penicillium expansum OX=27334 GN=cnsI PE=1 SV=1	Aspergillus_kawachii__gene1945
Aspergillus_kawachii__gene2078	1	1764	OTHER	100	BGC0001793__AQV04224.1	1.19e-49	52.2	OTHER	sp|E9F8M3|SWNK_METRA	1.1e-161	49.1	sp|E9F8M3|SWNK_METRA PKS-NRPS hybrid synthetase swnK OS=Metarhizium robertsii (strain ARSEF 23 / ATCC MYA-3075) OX=655844 GN=swnK PE=1 SV=1	Aspergillus_kawachii__gene2078
Aspergillus_kawachii__gene2079	1	3795	OTHER	100	BGC0001793__AQV04224.1	9.08e-235	58.7	OTHER	sp|E9F8M3|SWNK_METRA	0	55.3	sp|E9F8M3|SWNK_METRA PKS-NRPS hybrid synthetase swnK OS=Metarhizium robertsii (strain ARSEF 23 / ATCC MYA-3075) OX=655844 GN=swnK PE=1 SV=1	Aspergillus_kawachii__gene2079
Aspergillus_kawachii__gene2350	1	1703	OTHER	100	BGC0001244__AIW00670.1	3.38e-12	34.8	OTHER	sp|Q8L3X9|KASM_ARATH	5.62e-37	58.6	sp|Q8L3X9|KASM_ARATH 3-oxoacyl-[acyl-carrier-protein] synthase, mitochondrial OS=Arabidopsis thaliana OX=3702 GN=KAS PE=1 SV=1	Aspergillus_kawachii__gene2350
Aspergillus_kawachii__gene2604	1	9201	hr_pks	100	aspergillus_tubingensis_cbs_134_48_gca_001890745__gene___ASPTUDRAFT_927185	0	58.1	hr_pks	sp|G3XMD1|AZAB_ASPNA	0	33.5	sp|G3XMD1|AZAB_ASPNA Highly reducing polyketide synthase azaB OS=Aspergillus niger (strain ATCC 1015 / CBS 113.46 / FGSC A1144 / LSHB Ac4 / NCTC 3858a / NRRL 328 / USDA 3528.7) OX=380704 GN=azaB PE=1 SV=1	Aspergillus_kawachii__gene2604
Aspergillus_kawachii__gene2698	1	7854	hr_pks	99.7	BGC0002525__BBU37368.1	1.9e-157	38.1	hr_pks	sp|A0A6S5ZY48|G433_FUSSX	2.58e-238	35.6	sp|A0A6S5ZY48|G433_FUSSX Highly reducing polyketide synthase g433 OS=Fusarium sp. OX=29916 GN=g433 PE=2 SV=1	Aspergillus_kawachii__gene2698
Aspergillus_kawachii__gene2702	1	1771	hr_pks	100	BGC0001141__AIA58899.1	6.99e-70	46.1	hr_pks	sp|A0A068ABB7|BREF7_EUPBR	5.11e-66	46.1	sp|A0A068ABB7|BREF7_EUPBR Highly reducing polyketide synthase OS=Eupenicillium brefeldianum OX=1131482 GN=Bref-PKS PE=1 SV=1	Aspergillus_kawachii__gene2702
Aspergillus_kawachii__gene2964	1	7409	hr_pks	100	BGC0002729__EAA36364.1	6.02e-249	48.2	hr_pks	sp|Q7SHI6|SRDA_NEUCR	0	42.8	sp|Q7SHI6|SRDA_NEUCR Highly reducing polyketide synthase srdA OS=Neurospora crassa (strain ATCC 24698 / 74-OR23-1A / CBS 708.71 / DSM 1257 / FGSC 987) OX=367110 GN=srdA PE=2 SV=1	Aspergillus_kawachii__gene2964
Aspergillus_kawachii__gene3458	1	8162	hr_pks	100	aspergillus_calidoustus_gca_001511075__gene___ASPCAL07647	6.14e-206	51	hr_pks	sp|Q2ABP6|PKSF_ALTSO	5.48e-162	44.2	sp|Q2ABP6|PKSF_ALTSO Reducing polyketide synthase pksF OS=Alternaria solani OX=48100 GN=pksF PE=1 SV=1	Aspergillus_kawachii__gene3458
Aspergillus_kawachii__gene3688	1	7384	hr_pks	100	BGC0002227__GAA85575.1	0	100	hr_pks	sp|A0A068ABB7|BREF7_EUPBR	0	42.9	sp|A0A068ABB7|BREF7_EUPBR Highly reducing polyketide synthase OS=Eupenicillium brefeldianum OX=1131482 GN=Bref-PKS PE=1 SV=1	Aspergillus_kawachii__gene3688
Aspergillus_kawachii__gene3972	1	7523	hr_pks	100	sp|A5ABG0|PYNA_ASPNC	1.01e-174	51.6	hr_pks	sp|A5ABG0|PYNA_ASPNC	0	42.3	sp|A5ABG0|PYNA_ASPNC Hybrid PKS-NRPS synthetase pynA OS=Aspergillus niger (strain CBS 513.88 / FGSC A1513) OX=425011 GN=pynA PE=1 SV=1	Aspergillus_kawachii__gene3972
Aspergillus_kawachii__gene4038	1	9183	hr_pks	100	sp|Q0CS88|TAZB_ASPTN	5.84e-203	45	hr_pks	sp|G4NEB1|NEC1_MAGO7	1.43e-159	36.7	sp|G4NEB1|NEC1_MAGO7 Highly reducing polyketide synthase NEC1 OS=Magnaporthe oryzae (strain 70-15 / ATCC MYA-4617 / FGSC 8958) OX=242507 GN=NEC1 PE=1 SV=1	Aspergillus_kawachii__gene4038
Aspergillus_kawachii__gene4041	1	7567	hr_pks	100	Chlorociboria_aeruginascens__gene-B7494_g1069	8.01e-188	41.2	hr_pks	sp|A0A0D2YG10|FUB1_FUSO4	0	33.9	sp|A0A0D2YG10|FUB1_FUSO4 Reducing polyketide synthase FUB1 OS=Fusarium oxysporum f. sp. lycopersici (strain 4287 / CBS 123668 / FGSC 9935 / NRRL 34936) OX=426428 GN=FUB1 PE=1 SV=2	Aspergillus_kawachii__gene4041
Aspergillus_kawachii__gene4050	1	5394	OTHER	100	BGC0000156__AEN83889.1	0	97.4	OTHER	sp|G3KLH6|ADAA_ASPNG	0	95.3	sp|G3KLH6|ADAA_ASPNG Non-reducing polyketide synthase adaA OS=Aspergillus niger OX=5061 GN=adaA PE=1 SV=1	Aspergillus_kawachii__gene4050
Aspergillus_kawachii__gene4111	1	12015	hr_pks	100	BGC0001892__ATZ45182.1	2.56e-164	44.3	hr_pks	sp|Q4WAZ9|PSOA_ASPFU	0	30.7	sp|Q4WAZ9|PSOA_ASPFU PKS-NRPS hybrid synthetase psoA OS=Neosartorya fumigata (strain ATCC MYA-4609 / Af293 / CBS 101355 / FGSC A1100) OX=330879 GN=NRPS14 PE=2 SV=2	Aspergillus_kawachii__gene4111
Aspergillus_kawachii__gene4116	1	8241	hr_pks	100	BGC0002525__BBU37368.1	1.16e-143	43	hr_pks	sp|W7LKX1|FUM1_GIBM7	3.1e-182	30.1	sp|W7LKX1|FUM1_GIBM7 Highly reducing polyketide synthase FUM1 OS=Gibberella moniliformis (strain M3125 / FGSC 7600) OX=334819 GN=FUM1 PE=2 SV=1	Aspergillus_kawachii__gene4116
Aspergillus_kawachii__gene4768	1	7699	hr_pks	100	BGC0001749__EHA52508.1	1.02e-118	38.8	hr_pks	sp|Q7SHI6|SRDA_NEUCR	1.26e-201	37.3	sp|Q7SHI6|SRDA_NEUCR Highly reducing polyketide synthase srdA OS=Neurospora crassa (strain ATCC 24698 / 74-OR23-1A / CBS 708.71 / DSM 1257 / FGSC 987) OX=367110 GN=srdA PE=2 SV=1	Aspergillus_kawachii__gene4768
Aspergillus_kawachii__gene5022	1	7008	hr_pks	100	aspergillus_eucalypticola_cbs_122712_gca_003184535__gene___BO83DRAFT_449894	0	77.5	hr_pks	sp|N4WHE3|PKS1_COCH4	0	32.9	sp|N4WHE3|PKS1_COCH4 Reducing polyketide synthase PKS1 OS=Cochliobolus heterostrophus (strain C4 / ATCC 48331 / race T) OX=665024 GN=PKS1 PE=3 SV=1	Aspergillus_kawachii__gene5022
Aspergillus_kawachii__gene5207	1	11162	hr_pks	100	BGC0000992__AAV66110.2	1.05e-235	55.2	hr_pks	sp|Q5SBL6|FSDS_FUSHE	0	30.1	sp|Q5SBL6|FSDS_FUSHE Fusaridione A synthetase fsdS OS=Fusarium heterosporum OX=42747 GN=fsdS PE=3 SV=2	Aspergillus_kawachii__gene5207
Aspergillus_kawachii__gene5431	1	8233	hr_pks	100	talaromyces_islandicus_gca_000985935__gene___PISL3812_01117	3.18e-153	46.6	hr_pks	sp|Q86ZD9|SQTKS_PHOSC	9.13e-304	32.7	sp|Q86ZD9|SQTKS_PHOSC Squalestatin tetraketide synthase OS=Phoma sp. (strain C2932) OX=86977 GN=pks1 PE=1 SV=1	Aspergillus_kawachii__gene5431
Aspergillus_kawachii__gene5580	1	5092	hr_pks	100	rasamsonia_emersonii_cbs_393_64_gca_000968595__gene___T310_9851	1.29e-27	36.9	hr_pks	sp|G4NEB1|NEC1_MAGO7	1.88e-92	27.5	sp|G4NEB1|NEC1_MAGO7 Highly reducing polyketide synthase NEC1 OS=Magnaporthe oryzae (strain 70-15 / ATCC MYA-4617 / FGSC 8958) OX=242507 GN=NEC1 PE=1 SV=1	Aspergillus_kawachii__gene5580
Aspergillus_kawachii__gene5711	1	6786	hr_pks	100	cadophora_sp_dse1049_gca_003073865__gene___DL98DRAFT_485729	1.91e-176	53	hr_pks	sp|N4WHE3|PKS1_COCH4	1.57e-262	31.4	sp|N4WHE3|PKS1_COCH4 Reducing polyketide synthase PKS1 OS=Cochliobolus heterostrophus (strain C4 / ATCC 48331 / race T) OX=665024 GN=PKS1 PE=3 SV=1	Aspergillus_kawachii__gene5711
Aspergillus_kawachii__gene6225	1	6194	OUTLIER	*	None	None	None	None	sp|Q2TXG3|ORYB_ASPOR	0	47.5	sp|Q2TXG3|ORYB_ASPOR Fatty acid synthase subunit beta OS=Aspergillus oryzae (strain ATCC 42149 / RIB 40) OX=510516 GN=oryfasB PE=3 SV=1	Aspergillus_kawachii__gene6225
Aspergillus_kawachii__gene632	1	984	OTHER	100	BGC0002212__ESK96613.1	4.56e-14	27.2	OTHER	sp|P71019|FABD_BACSU	1.63e-36	36.3	sp|P71019|FABD_BACSU Malonyl CoA-acyl carrier protein transacylase OS=Bacillus subtilis (strain 168) OX=224308 GN=fabD PE=3 SV=2	Aspergillus_kawachii__gene632
Aspergillus_kawachii__gene6359	1	6670	OTHER	100	sp|A0A1L9UCG2|ALBA_ASPBC	0	96.9	OTHER	sp|G3XLL5|ALBA_ASPNA	0	88.5	sp|G3XLL5|ALBA_ASPNA Non-reducing polyketide synthase albA OS=Aspergillus niger (strain ATCC 1015 / CBS 113.46 / FGSC A1144 / LSHB Ac4 / NCTC 3858a / NRRL 328 / USDA 3528.7) OX=380704 GN=albA PE=3 SV=1	Aspergillus_kawachii__gene6359
Aspergillus_kawachii__gene6388	1	2562	hr_pks	100	BGC0002525__BBU37368.1	5.54e-86	30	hr_pks	sp|A0A6S5ZY48|G433_FUSSX	4.19e-82	29.9	sp|A0A6S5ZY48|G433_FUSSX Highly reducing polyketide synthase g433 OS=Fusarium sp. OX=29916 GN=g433 PE=2 SV=1	Aspergillus_kawachii__gene6388
Aspergillus_kawachii__gene6694	1	5406	OTHER	100	sp|A2QK66|KTNS_ASPNC	0	66.5	OTHER	sp|A2QK66|KTNS_ASPNC	0	59.7	sp|A2QK66|KTNS_ASPNC Kotanin synthase OS=Aspergillus niger (strain CBS 513.88 / FGSC A1513) OX=425011 GN=ktnS PE=3 SV=1	Aspergillus_kawachii__gene6694
Aspergillus_kawachii__gene7290	1	7469	hr_pks	100	aspergillus_aculeatinus_cbs_121060_gca_003184765__gene___BO66DRAFT_460892	2.17e-201	69	hr_pks	sp|A0A0A2JW91|CNSI_PENEN	0	45.1	sp|A0A0A2JW91|CNSI_PENEN Highly reducing polyketide synthase cnsI OS=Penicillium expansum OX=27334 GN=cnsI PE=1 SV=1	Aspergillus_kawachii__gene7290
Aspergillus_kawachii__gene7296	1	9035	hr_pks	99.7	BGC0002525__BBU37368.1	5.72e-139	49.4	hr_pks	sp|S3D9F1|GLOL_GLAL2	0	41.7	sp|S3D9F1|GLOL_GLAL2 Highly reducing polyketide synthase gloL OS=Glarea lozoyensis (strain ATCC 20868 / MF5171) OX=1116229 GN=gloL PE=1 SV=1	Aspergillus_kawachii__gene7296
Aspergillus_kawachii__gene7930	1	7916	OTHER	100	BGC0001338__ALI92655.1	0	59.4	OTHER	sp|A0A481WQB6|CLAF_PENCR	0	53.7	sp|A0A481WQB6|CLAF_PENCR Clavatol synthase claF OS=Penicillium crustosum OX=36656 GN=claF PE=1 SV=1	Aspergillus_kawachii__gene7930
Aspergillus_kawachii__gene8261	1	7657	hr_pks	99.4	BGC0002525__BBU37368.1	7.84e-210	52.2	hr_pks	sp|A0A6S5ZY48|G433_FUSSX	0	43.1	sp|A0A6S5ZY48|G433_FUSSX Highly reducing polyketide synthase g433 OS=Fusarium sp. OX=29916 GN=g433 PE=2 SV=1	Aspergillus_kawachii__gene8261
Aspergillus_kawachii__gene8275	1	8261	OTHER	100	BGC0001360__CDM36726.1	3.79e-160	36.6	OTHER	sp|K2QVI8|DPMPA_MACPH	7.28e-220	29.5	sp|K2QVI8|DPMPA_MACPH Non-reducing polyketide synthase dpmpA OS=Macrophomina phaseolina (strain MS6) OX=1126212 GN=dpmpA PE=1 SV=1	Aspergillus_kawachii__gene8275
Aspergillus_kawachii__gene8324	1	8205	hr_pks	100	BGC0002502__AEA35016.1	6.36e-71	28.7	hr_pks	sp|A0A6S5ZY48|G433_FUSSX	9.89e-222	28.6	sp|A0A6S5ZY48|G433_FUSSX Highly reducing polyketide synthase g433 OS=Fusarium sp. OX=29916 GN=g433 PE=2 SV=1	Aspergillus_kawachii__gene8324
Aspergillus_kawachii__gene8459	1	8184	hr_pks	100	dibaeis_baeomyces__gene_5150	1.6e-219	43.7	hr_pks	sp|Q5KTM9|ALT5_ALTSO	0	34.5	sp|Q5KTM9|ALT5_ALTSO Highly reducing polyketide synthase alt5 OS=Alternaria solani OX=48100 GN=alt5 PE=1 SV=1	Aspergillus_kawachii__gene8459
Aspergillus_kawachii__gene8852	1	5610	OTHER	100	BGC0002171__EHA27898.1	0	87.1	OTHER	sp|G3XNF4|ATPKS_ASPNA	0	85.2	sp|G3XNF4|ATPKS_ASPNA PKS-NRPS hybrid synthetase ATPKS OS=Aspergillus niger (strain ATCC 1015 / CBS 113.46 / FGSC A1144 / LSHB Ac4 / NCTC 3858a / NRRL 328 / USDA 3528.7) OX=380704 GN=ATPKS PE=1 SV=1	Aspergillus_kawachii__gene8852
Aspergillus_kawachii__gene8994	1	8175	hr_pks	100	BGC0002525__BBU37368.1	2.24e-80	27.5	hr_pks	sp|A0A6S5ZY48|G433_FUSSX	3.69e-274	28	sp|A0A6S5ZY48|G433_FUSSX Highly reducing polyketide synthase g433 OS=Fusarium sp. OX=29916 GN=g433 PE=2 SV=1	Aspergillus_kawachii__gene8994
Aspergillus_kawachii__gene9062	1	6674	OTHER	100	BGC0001578__EED21099.1	5.87e-274	65.7	OTHER	sp|A0A142C799|PHNA_PENHR	1.27e-254	37.7	sp|A0A142C799|PHNA_PENHR Non-reducing polyketide synthase phnA OS=Penicillium herquei OX=69774 GN=phnA PE=1 SV=1	Aspergillus_kawachii__gene9062
Aspergillus_kawachii__gene9341__renamed0025	1	8494	hr_pks	100	Aspergillus_kawachii__gene9341	4.92e-223	55.3	hr_pks	sp|Q8J0F5|MLCB_PENCI	6.98e-204	28.8	sp|Q8J0F5|MLCB_PENCI Compactin diketide synthase mlcB OS=Penicillium citrinum OX=5077 GN=mlcB PE=1 SV=1	Aspergillus_kawachii__gene9341
Aspergillus_kawachii__gene984	1	7863	hr_pks	100	BGC0002238__BAE61265.1	4.83e-207	59.9	hr_pks	sp|A0A1V6NYI6|VERA_PENPO	0	42.4	sp|A0A1V6NYI6|VERA_PENPO Highly reducing polyketide synthase verA OS=Penicillium polonicum OX=60169 GN=verA PE=3 SV=1	Aspergillus_kawachii__gene984
Aspergillus_kawachii__gene9993	1	6463	OUTLIER	*	None	None	None	None	sp|Q5AV07|ATNM_EMENI	0	47.9	sp|Q5AV07|ATNM_EMENI Fatty acid synthase beta subunit aflB OS=Emericella nidulans (strain FGSC A4 / ATCC 38163 / CBS 112.46 / NRRL 194 / M139) OX=227321 GN=atnM PE=2 SV=1	Aspergillus_kawachii__gene9993
Aspergillus_mulundensis__gene10024	1	7955	hr_pks	100	BGC0002525__BBU37368.1	7.05e-115	45.3	hr_pks	sp|A0A6S5ZY48|G433_FUSSX	0	34.4	sp|A0A6S5ZY48|G433_FUSSX Highly reducing polyketide synthase g433 OS=Fusarium sp. OX=29916 GN=g433 PE=2 SV=1	Aspergillus_mulundensis__gene10024
Aspergillus_mulundensis__gene10266	1	7546	hr_pks	100	BGC0001141__AIA58899.1	6.52e-134	41.7	hr_pks	sp|A0A068ABB7|BREF7_EUPBR	0	41.4	sp|A0A068ABB7|BREF7_EUPBR Highly reducing polyketide synthase OS=Eupenicillium brefeldianum OX=1131482 GN=Bref-PKS PE=1 SV=1	Aspergillus_mulundensis__gene10266
Aspergillus_mulundensis__gene10504	1	1683	OTHER	100	sp|B8NYX0|FLUP_ASPFN	2.27e-14	31.6	OTHER	sp|Q8L3X9|KASM_ARATH	1.29e-60	56.8	sp|Q8L3X9|KASM_ARATH 3-oxoacyl-[acyl-carrier-protein] synthase, mitochondrial OS=Arabidopsis thaliana OX=3702 GN=KAS PE=1 SV=1	Aspergillus_mulundensis__gene10504
Aspergillus_mulundensis__gene1120	1	8333	hr_pks	100	aspergillus_clavatus__gene___ACLA_098370	2.54e-86	31.5	hr_pks	sp|Q86ZD9|SQTKS_PHOSC	1.18e-232	34.3	sp|Q86ZD9|SQTKS_PHOSC Squalestatin tetraketide synthase OS=Phoma sp. (strain C2932) OX=86977 GN=pks1 PE=1 SV=1	Aspergillus_mulundensis__gene1120
Aspergillus_mulundensis__gene11553	1	9461	hr_pks	100	BGC0002258__BBI47418.1	0	66.4	hr_pks	sp|A0A1V6NYI6|VERA_PENPO	0	49.8	sp|A0A1V6NYI6|VERA_PENPO Highly reducing polyketide synthase verA OS=Penicillium polonicum OX=60169 GN=verA PE=3 SV=1	Aspergillus_mulundensis__gene11553
Aspergillus_mulundensis__gene1259	1	3099	OTHER	100	BGC0002255__AMJ52084.1	3.76e-55	47	OTHER	sp|A2QTE9|EPAA_ASPNC	1.76e-289	52.4	sp|A2QTE9|EPAA_ASPNC Non-reducing polyketide synthase epaA OS=Aspergillus niger (strain CBS 513.88 / FGSC A1513) OX=425011 GN=epaA PE=3 SV=1	Aspergillus_mulundensis__gene1259
Aspergillus_mulundensis__gene1503	1	8539	hr_pks	100	aspergillus_uvarum_cbs_121591_gca_003184745__gene___BO82DRAFT_343463	5.75e-105	34.5	hr_pks	sp|A0A0S6XH49|FRBB_BLOB1	1.37e-181	26.2	sp|A0A0S6XH49|FRBB_BLOB1 Highly reducing polyketide synthase frbB OS=Fungal sp. (strain No.11243) OX=1603295 GN=frbB PE=1 SV=1	Aspergillus_mulundensis__gene1503
Aspergillus_mulundensis__gene1690	1	8464	hr_pks	100	BGC0001339__AMY15068.1	1.97e-127	54.2	hr_pks	sp|A0A3G1DJF3|SQHKS_PHOSM	4.84e-268	45.6	sp|A0A3G1DJF3|SQHKS_PHOSM Squalestatin hexaketide synthase OS=Phoma sp. (strain ATCC 20986 / MF5453) OX=1828523 GN=pks2 PE=2 SV=1	Aspergillus_mulundensis__gene1690
Aspergillus_mulundensis__gene1754	1	8278	hr_pks	100	aspergillus_brasiliensis_cbs_101740_gca_001889945__gene___ASPBRDRAFT_199676	7e-250	45.3	hr_pks	sp|A0A1W5T1T1|POXF_PENOX	5.05e-232	29.3	sp|A0A1W5T1T1|POXF_PENOX Highly reducing polyketide synthase poxF OS=Penicillium oxalicum OX=69781 GN=poxF PE=2 SV=1	Aspergillus_mulundensis__gene1754
Aspergillus_mulundensis__gene1783	1	9910	hr_pks	100	BGC0001892__ATZ45185.1	3.24e-73	35.4	hr_pks	sp|W7LKX1|FUM1_GIBM7	1.9e-116	26.3	sp|W7LKX1|FUM1_GIBM7 Highly reducing polyketide synthase FUM1 OS=Gibberella moniliformis (strain M3125 / FGSC 7600) OX=334819 GN=FUM1 PE=2 SV=1	Aspergillus_mulundensis__gene1783
Aspergillus_mulundensis__gene2087	1	12470	hr_pks	100	BGC0001857__QBE85649.1	0	69.3	hr_pks	sp|A0A411L027|BUAA_ASPBU	0	65.9	sp|A0A411L027|BUAA_ASPBU Hybrid PKS-NRPS synthetase buaA OS=Aspergillus burnettii OX=2508778 GN=buaA PE=3 SV=1	Aspergillus_mulundensis__gene2087
Aspergillus_mulundensis__gene2452	1	5546	OTHER	100	BGC0000684__CBF70387.1	0	92.7	OTHER	sp|Q5B0D0|APTA_EMENI	0	70	sp|Q5B0D0|APTA_EMENI Non-reducing polyketide synthase aptA OS=Emericella nidulans (strain FGSC A4 / ATCC 38163 / CBS 112.46 / NRRL 194 / M139) OX=227321 GN=aptA PE=1 SV=1	Aspergillus_mulundensis__gene2452
Aspergillus_mulundensis__gene2781	1	8132	hr_pks	100	BGC0000983__EAW09117.1	1.05e-169	39.3	hr_pks	sp|A1CLY8|CCSA_ASPCL	7.67e-256	36.6	sp|A1CLY8|CCSA_ASPCL Polyketide synthase-nonribosomal peptide synthetase OS=Aspergillus clavatus (strain ATCC 1007 / CBS 513.65 / DSM 816 / NCTC 3887 / NRRL 1 / QM 1276 / 107) OX=344612 GN=ccsA PE=3 SV=1	Aspergillus_mulundensis__gene2781
Aspergillus_mulundensis__gene2926	1	8987	hr_pks	100	BGC0002168__QQW45467.1	0	63	hr_pks	sp|A0A1V6PAF7|CALA_PENDC	0	60.9	sp|A0A1V6PAF7|CALA_PENDC Highly reducing polyketide synthase calA OS=Penicillium decumbens OX=69771 GN=calA PE=1 SV=1	Aspergillus_mulundensis__gene2926
Aspergillus_mulundensis__gene2950	1	4594	hr_pks	100	aspergillus_turcosus_gca_002234965__gene___CDV55_03573	4.46e-141	35.9	hr_pks	sp|N4WHE3|PKS1_COCH4	8.44e-102	31.7	sp|N4WHE3|PKS1_COCH4 Reducing polyketide synthase PKS1 OS=Cochliobolus heterostrophus (strain C4 / ATCC 48331 / race T) OX=665024 GN=PKS1 PE=3 SV=1	Aspergillus_mulundensis__gene2950
Aspergillus_mulundensis__gene3310	1	6315	OTHER	100	BGC0001446__EED57518.1	0	60.9	OTHER	sp|B8MYS6|PKS27_ASPFN	0	50.2	sp|B8MYS6|PKS27_ASPFN Non-reducing polyketide synthase pks27 OS=Aspergillus flavus (strain ATCC 200026 / FGSC A1120 / IAM 13836 / NRRL 3357 / JCM 12722 / SRRC 167) OX=332952 GN=pks27 PE=1 SV=1	Aspergillus_mulundensis__gene3310
Aspergillus_mulundensis__gene3318	1	6206	OUTLIER	*	None	None	None	None	sp|Q5AV07|ATNM_EMENI	0	41.1	sp|Q5AV07|ATNM_EMENI Fatty acid synthase beta subunit aflB OS=Emericella nidulans (strain FGSC A4 / ATCC 38163 / CBS 112.46 / NRRL 194 / M139) OX=227321 GN=atnM PE=2 SV=1	Aspergillus_mulundensis__gene3318
Aspergillus_mulundensis__gene3507	1	7899	hr_pks	100	BGC0001290__CBF87072.1	2.19e-273	53.8	hr_pks	sp|Q5BA83|EASB_EMENI	0	72	sp|Q5BA83|EASB_EMENI Highly reducing polyketide synthase easB OS=Emericella nidulans (strain FGSC A4 / ATCC 38163 / CBS 112.46 / NRRL 194 / M139) OX=227321 GN=easB PE=3 SV=1	Aspergillus_mulundensis__gene3507
Aspergillus_mulundensis__gene3900	1	6259	OTHER	100	sp|A0A0N9HNS9|DESS_ASPDE	0	72.3	OTHER	sp|A0A0N9HNS9|DESS_ASPDE	0	69.7	sp|A0A0N9HNS9|DESS_ASPDE Desertorin synthase OS=Aspergillus desertorum OX=1810909 GN=desS PE=3 SV=1	Aspergillus_mulundensis__gene3900
Aspergillus_mulundensis__gene3974	1	7743	hr_pks	100	BGC0002525__BBU37368.1	1.61e-144	37.5	hr_pks	sp|A0A6S5ZY48|G433_FUSSX	3.91e-276	34	sp|A0A6S5ZY48|G433_FUSSX Highly reducing polyketide synthase g433 OS=Fusarium sp. OX=29916 GN=g433 PE=2 SV=1	Aspergillus_mulundensis__gene3974
Aspergillus_mulundensis__gene4094	1	7095	OTHER	100	BGC0001242__CCE67070.1	4.1e-204	58.9	OTHER	sp|S0DTP6|FSR1_GIBF5	0	42.9	sp|S0DTP6|FSR1_GIBF5 Non-reducing polyketide synthase fsr1 OS=Gibberella fujikuroi (strain CBS 195.34 / IMI 58289 / NRRL A-6831) OX=1279085 GN=FSR1 PE=2 SV=1	Aspergillus_mulundensis__gene4094
Aspergillus_mulundensis__gene4176	1	8550	hr_pks	100	BGC0001358__OAQ83765.1	1.66e-156	40.6	hr_pks	sp|A0A6S5ZY48|G433_FUSSX	3.91e-233	28.5	sp|A0A6S5ZY48|G433_FUSSX Highly reducing polyketide synthase g433 OS=Fusarium sp. OX=29916 GN=g433 PE=2 SV=1	Aspergillus_mulundensis__gene4176
Aspergillus_mulundensis__gene430	1	6669	OTHER	100	BGC0000107__CBF74114.1	0	90.9	OTHER	sp|Q03149|WA_EMENI	0	71.4	sp|Q03149|WA_EMENI Conidial yellow pigment biosynthesis polyketide synthase OS=Emericella nidulans (strain FGSC A4 / ATCC 38163 / CBS 112.46 / NRRL 194 / M139) OX=227321 GN=wA PE=1 SV=2	Aspergillus_mulundensis__gene430
Aspergillus_mulundensis__gene4680	1	7956	hr_pks	100	BGC0001724__EPS29069.1	0	66.9	hr_pks	sp|S7ZFK6|POXE_PENO1	0	45.4	sp|S7ZFK6|POXE_PENO1 Hybrid PKS-NRPS synthetase poxE OS=Penicillium oxalicum (strain 114-2 / CGMCC 5302) OX=933388 GN=poxE PE=2 SV=1	Aspergillus_mulundensis__gene4680
Aspergillus_mulundensis__gene508	1	7762	OTHER	100	BGC0002734__EAU35431.1	0	64.7	OTHER	sp|Q0CRQ5|5MOAS_ASPTN	0	59.3	sp|Q0CRQ5|5MOAS_ASPTN 5-methylorsellinic acid synthase OS=Aspergillus terreus (strain NIH 2624 / FGSC A1156) OX=341663 GN=ATEG_03629 PE=1 SV=1	Aspergillus_mulundensis__gene508
Aspergillus_mulundensis__gene5333	1	846	OTHER	100	BGC0002237__BAE62229.1	4.68e-13	30.5	OTHER	sp|P71019|FABD_BACSU	3.68e-27	35.5	sp|P71019|FABD_BACSU Malonyl CoA-acyl carrier protein transacylase OS=Bacillus subtilis (strain 168) OX=224308 GN=fabD PE=3 SV=2	Aspergillus_mulundensis__gene5333
Aspergillus_mulundensis__gene5788	1	7741	hr_pks	100	BGC0001339__AMY15068.1	0	62.6	hr_pks	sp|A0A3G1DJF3|SQHKS_PHOSM	0	55.3	sp|A0A3G1DJF3|SQHKS_PHOSM Squalestatin hexaketide synthase OS=Phoma sp. (strain ATCC 20986 / MF5453) OX=1828523 GN=pks2 PE=2 SV=1	Aspergillus_mulundensis__gene5788
Aspergillus_mulundensis__gene6286	1	6612	OTHER	100	BGC0001722__CBF83139.1	0	88.2	OTHER	sp|Q5B8A0|PKFA_EMENI	0	84.1	sp|Q5B8A0|PKFA_EMENI Non-reducing polyketide synthase pkfA OS=Emericella nidulans (strain FGSC A4 / ATCC 38163 / CBS 112.46 / NRRL 194 / M139) OX=227321 GN=pkfA PE=1 SV=1	Aspergillus_mulundensis__gene6286
Aspergillus_mulundensis__gene6396	1	6396	OTHER	100	sp|Q5B7U4|PKIA_EMENI	0	80.2	OTHER	sp|Q5B7U4|PKIA_EMENI	0	74.8	sp|Q5B7U4|PKIA_EMENI Non-reducing polyketide synthase pkiA OS=Emericella nidulans (strain FGSC A4 / ATCC 38163 / CBS 112.46 / NRRL 194 / M139) OX=227321 GN=pkiA PE=1 SV=1	Aspergillus_mulundensis__gene6396
Aspergillus_mulundensis__gene6401	1	6252	OUTLIER	*	None	None	None	None	sp|A0A1U8QK63|PKIC_EMENI	0	68.3	sp|A0A1U8QK63|PKIC_EMENI Fatty acid synthase beta subunit pkiC OS=Emericella nidulans (strain FGSC A4 / ATCC 38163 / CBS 112.46 / NRRL 194 / M139) OX=227321 GN=pkiC PE=1 SV=1	Aspergillus_mulundensis__gene6401
Aspergillus_mulundensis__gene6642	1	6027	OTHER	100	BGC0002237__BAE62229.1	0	77.7	OTHER	sp|Q5AXA9|PKGA_EMENI	0	56.6	sp|Q5AXA9|PKGA_EMENI Non-reducing polyketide synthase pkgA OS=Emericella nidulans (strain FGSC A4 / ATCC 38163 / CBS 112.46 / NRRL 194 / M139) OX=227321 GN=pkgA PE=1 SV=1	Aspergillus_mulundensis__gene6642
Aspergillus_mulundensis__gene7015	1	7888	hr_pks	100	sp|G0R6S8|SORA_HYPJQ	1.31e-302	57.9	hr_pks	sp|Q0CF75|AZPB1_ASPTN	0	51.4	sp|Q0CF75|AZPB1_ASPTN Highly reducing polyketide synthase ATEG_07659 OS=Aspergillus terreus (strain NIH 2624 / FGSC A1156) OX=341663 GN=ATEG_07659 PE=1 SV=1	Aspergillus_mulundensis__gene7015
Aspergillus_mulundensis__gene7239	1	2499	hr_pks	100	aspergillus_clavatus__gene___ACLA_098370	1.03e-23	52.8	hr_pks	sp|Q0CF75|AZPB1_ASPTN	1.46e-89	37.1	sp|Q0CF75|AZPB1_ASPTN Highly reducing polyketide synthase ATEG_07659 OS=Aspergillus terreus (strain NIH 2624 / FGSC A1156) OX=341663 GN=ATEG_07659 PE=1 SV=1	Aspergillus_mulundensis__gene7239
Aspergillus_mulundensis__gene7426	1	6324	OUTLIER	*	None	None	None	None	sp|P34229|FAS1_YARLI	0	59.5	sp|P34229|FAS1_YARLI Fatty acid synthase subunit beta OS=Yarrowia lipolytica (strain CLIB 122 / E 150) OX=284591 GN=FAS1 PE=3 SV=2	Aspergillus_mulundensis__gene7426
Aspergillus_mulundensis__gene8948	1	6502	OTHER	100	BGC0002212__ESK96613.1	7.84e-128	45.4	OTHER	sp|A0A2H3CTK0|ARMB_ARMGA	5.69e-117	44.7	sp|A0A2H3CTK0|ARMB_ARMGA Orsellinic acid synthase armB OS=Armillaria gallica OX=47427 GN=armB PE=1 SV=1	Aspergillus_mulundensis__gene8948
Aspergillus_mulundensis__gene9	1	6457	OTHER	100	BGC0000057__EAA59563.1	0	91.7	OTHER	sp|Q5AUX1|ORSA_EMENI	0	80	sp|Q5AUX1|ORSA_EMENI Orsellinic acid synthase OS=Emericella nidulans (strain FGSC A4 / ATCC 38163 / CBS 112.46 / NRRL 194 / M139) OX=227321 GN=orsA PE=1 SV=1	Aspergillus_mulundensis__gene9
Aspergillus_mulundensis__gene9584	1	5089	OTHER	100	BGC0000057__EAA59563.1	1.2e-256	50.2	OTHER	sp|Q5AUX1|ORSA_EMENI	0	40	sp|Q5AUX1|ORSA_EMENI Orsellinic acid synthase OS=Emericella nidulans (strain FGSC A4 / ATCC 38163 / CBS 112.46 / NRRL 194 / M139) OX=227321 GN=orsA PE=1 SV=1	Aspergillus_mulundensis__gene9584
Aspergillus_mulundensis__gene9600	1	7721	OTHER	100	BGC0001446__EED57518.1	0	58.8	OTHER	sp|B8MYS6|PKS27_ASPFN	0	62.1	sp|B8MYS6|PKS27_ASPFN Non-reducing polyketide synthase pks27 OS=Aspergillus flavus (strain ATCC 200026 / FGSC A1120 / IAM 13836 / NRRL 3357 / JCM 12722 / SRRC 167) OX=332952 GN=pks27 PE=1 SV=1	Aspergillus_mulundensis__gene9600
Aspergillus_mulundensis__gene9821	1	7977	hr_pks	100	BGC0000022__EAA65604.1	0	78.2	hr_pks	sp|Q5BEJ4|AFOG_EMENI	0	81.6	sp|Q5BEJ4|AFOG_EMENI Asperfuranone polyketide synthase afoG OS=Emericella nidulans (strain FGSC A4 / ATCC 38163 / CBS 112.46 / NRRL 194 / M139) OX=227321 GN=afoG PE=1 SV=1	Aspergillus_mulundensis__gene9821
Aspergillus_mulundensis__gene9830	1	8160	OTHER	100	BGC0000022__EAA65602.1	0	89.4	OTHER	sp|Q5BEJ6|AFOE_EMENI	0	83.2	sp|Q5BEJ6|AFOE_EMENI Iterative polyketide synthase afoE OS=Emericella nidulans (strain FGSC A4 / ATCC 38163 / CBS 112.46 / NRRL 194 / M139) OX=227321 GN=afoE PE=1 SV=1	Aspergillus_mulundensis__gene9830
Aspergillus_nanangensis__gene-FE257_000050	1	7573	hr_pks	100	BGC0001998__XP_659388.1	0	65.7	hr_pks	sp|A0A1U8QN18|SDGA_EMENI	0	54.6	sp|A0A1U8QN18|SDGA_EMENI Highly reducing polyketide synthase sdgA OS=Emericella nidulans (strain FGSC A4 / ATCC 38163 / CBS 112.46 / NRRL 194 / M139) OX=227321 GN=sdgA PE=1 SV=1	Aspergillus_nanangensis__gene-FE257_000050
Aspergillus_nanangensis__gene-FE257_000080	1	7832	OTHER	100	sp|Q5B7U4|PKIA_EMENI	0	60.1	OTHER	sp|Q5B7U4|PKIA_EMENI	0	53.5	sp|Q5B7U4|PKIA_EMENI Non-reducing polyketide synthase pkiA OS=Emericella nidulans (strain FGSC A4 / ATCC 38163 / CBS 112.46 / NRRL 194 / M139) OX=227321 GN=pkiA PE=1 SV=1	Aspergillus_nanangensis__gene-FE257_000080
Aspergillus_nanangensis__gene-FE257_000085	1	6422	OUTLIER	*	None	None	None	None	sp|A0A1U8QK63|PKIC_EMENI	0	51.4	sp|A0A1U8QK63|PKIC_EMENI Fatty acid synthase beta subunit pkiC OS=Emericella nidulans (strain FGSC A4 / ATCC 38163 / CBS 112.46 / NRRL 194 / M139) OX=227321 GN=pkiC PE=1 SV=1	Aspergillus_nanangensis__gene-FE257_000085
Aspergillus_nanangensis__gene-FE257_000579	1	8522	hr_pks	100	aspergillus_brasiliensis_cbs_101740_gca_001889945__gene___ASPBRDRAFT_199676	2.12e-240	43.8	hr_pks	sp|A0A3G9GQ29|CDME_TALVE	1.42e-168	29.1	sp|A0A3G9GQ29|CDME_TALVE 6-hydroxymellein synthase cdmE OS=Talaromyces verruculosus OX=198730 GN=cdmE PE=1 SV=1	Aspergillus_nanangensis__gene-FE257_000579
Aspergillus_nanangensis__gene-FE257_000597	1	8607	hr_pks	100	aspergillus_uvarum_cbs_121591_gca_003184745__gene___BO82DRAFT_343463	3.4e-121	38.1	hr_pks	sp|A0A3G1DJH7|SQTKS_PHOSM	2.44e-153	26.5	sp|A0A3G1DJH7|SQTKS_PHOSM Squalestatin tetraketide synthase OS=Phoma sp. (strain ATCC 20986 / MF5453) OX=1828523 GN=pks1 PE=1 SV=1	Aspergillus_nanangensis__gene-FE257_000597
Aspergillus_nanangensis__gene-FE257_000636	1	7859	hr_pks	100	penicillium_nalgiovense_gca_002072425__gene___PENNAL_c0003G00472	4.62e-136	34.8	hr_pks	sp|Q86ZD9|SQTKS_PHOSC	1.04e-265	29.1	sp|Q86ZD9|SQTKS_PHOSC Squalestatin tetraketide synthase OS=Phoma sp. (strain C2932) OX=86977 GN=pks1 PE=1 SV=1	Aspergillus_nanangensis__gene-FE257_000636
Aspergillus_nanangensis__gene-FE257_000707	1	6338	OUTLIER	*	None	None	None	None	sp|P34229|FAS1_YARLI	0	58.8	sp|P34229|FAS1_YARLI Fatty acid synthase subunit beta OS=Yarrowia lipolytica (strain CLIB 122 / E 150) OX=284591 GN=FAS1 PE=3 SV=2	Aspergillus_nanangensis__gene-FE257_000707
Aspergillus_nanangensis__gene-FE257_000830	1	7554	hr_pks	100	BGC0001373__BAV32159.1	4.46e-174	48.2	hr_pks	sp|A0A1B4XBH3|SDNO_SORAA	2.76e-227	43.4	sp|A0A1B4XBH3|SDNO_SORAA Highly reducing polyketide synthase sdnO OS=Sordaria araneosa OX=573841 GN=sdnO PE=3 SV=1	Aspergillus_nanangensis__gene-FE257_000830
Aspergillus_nanangensis__gene-FE257_000871	1	10714	hr_pks	100	sp|A0A0N0DCA3|DEP5_FUSLA	0	67.2	hr_pks	sp|D2E9X0|DEP5_ALTBR	0	53.7	sp|D2E9X0|DEP5_ALTBR Reducing polyketide synthase DEP5 OS=Alternaria brassicicola OX=29001 GN=DEP5 PE=2 SV=1	Aspergillus_nanangensis__gene-FE257_000871
Aspergillus_nanangensis__gene-FE257_000913	1	7553	hr_pks	99.1	BGC0001141__AIA58899.1	4.58e-149	60.7	hr_pks	sp|A0A068ABB7|BREF7_EUPBR	0	38.5	sp|A0A068ABB7|BREF7_EUPBR Highly reducing polyketide synthase OS=Eupenicillium brefeldianum OX=1131482 GN=Bref-PKS PE=1 SV=1	Aspergillus_nanangensis__gene-FE257_000913
Aspergillus_nanangensis__gene-FE257_001045	1	7951	hr_pks	100	Lepidopterella_palustris__gene11136	0	81.8	hr_pks	sp|S0EET5|FUJ1_GIBF5	0	51.6	sp|S0EET5|FUJ1_GIBF5 Polyketide synthase 19 OS=Gibberella fujikuroi (strain CBS 195.34 / IMI 58289 / NRRL A-6831) OX=1279085 GN=PKS19 PE=2 SV=1	Aspergillus_nanangensis__gene-FE257_001045
Aspergillus_nanangensis__gene-FE257_001065	1	7877	hr_pks	100	sp|A0A0E4AZP0|FSA1_FUSSF	8.97e-176	63.1	hr_pks	sp|Q5SBL6|FSDS_FUSHE	0	43.9	sp|Q5SBL6|FSDS_FUSHE Fusaridione A synthetase fsdS OS=Fusarium heterosporum OX=42747 GN=fsdS PE=3 SV=2	Aspergillus_nanangensis__gene-FE257_001065
Aspergillus_nanangensis__gene-FE257_001109	1	1238	hr_pks	100	BGC0001358__OAQ83765.1	2.18e-115	50.1	hr_pks	sp|A0A179H0J7|LCSC_PURLI	1.63e-107	50.3	sp|A0A179H0J7|LCSC_PURLI Highly reducing polyketide synthase lcsC OS=Purpureocillium lilacinum OX=33203 GN=lcsC PE=2 SV=1	Aspergillus_nanangensis__gene-FE257_001109
Aspergillus_nanangensis__gene-FE257_001300	1	8974	hr_pks	100	BGC0002525__BBU37368.1	1.86e-233	43.3	hr_pks	sp|S3D9F1|GLOL_GLAL2	0	41.3	sp|S3D9F1|GLOL_GLAL2 Highly reducing polyketide synthase gloL OS=Glarea lozoyensis (strain ATCC 20868 / MF5171) OX=1116229 GN=gloL PE=1 SV=1	Aspergillus_nanangensis__gene-FE257_001300
Aspergillus_nanangensis__gene-FE257_001460	1	3526	hr_pks	100	BGC0001124__EHA19289.1	1.14e-200	59.6	hr_pks	sp|Q0CZH1|PYTA_ASPTN	6.09e-181	54.7	sp|Q0CZH1|PYTA_ASPTN Hybrid PKS-NRPS synthetase pytA (Fragment) OS=Aspergillus terreus (strain NIH 2624 / FGSC A1156) OX=341663 GN=pytA PE=2 SV=1	Aspergillus_nanangensis__gene-FE257_001460
Aspergillus_nanangensis__gene-FE257_002059	1	8514	hr_pks	100	sp|A5ABG0|PYNA_ASPNC	2.76e-177	40.7	hr_pks	sp|A5ABG0|PYNA_ASPNC	0	40.3	sp|A5ABG0|PYNA_ASPNC Hybrid PKS-NRPS synthetase pynA OS=Aspergillus niger (strain CBS 513.88 / FGSC A1513) OX=425011 GN=pynA PE=1 SV=1	Aspergillus_nanangensis__gene-FE257_002059
Aspergillus_nanangensis__gene-FE257_002712	1	6456	OTHER	100	sp|Q4WZA8|ALB1_ASPFU	0	74.1	OTHER	sp|Q4WZA8|ALB1_ASPFU	0	62.6	sp|Q4WZA8|ALB1_ASPFU Conidial pigment polyketide synthase alb1 OS=Neosartorya fumigata (strain ATCC MYA-4609 / Af293 / CBS 101355 / FGSC A1100) OX=330879 GN=alb1 PE=1 SV=1	Aspergillus_nanangensis__gene-FE257_002712
Aspergillus_nanangensis__gene-FE257_003073	1	8276	hr_pks	100	BGC0002525__BBU37368.1	2.52e-126	36.3	hr_pks	sp|A0A6S5ZY48|G433_FUSSX	8.9e-290	30.1	sp|A0A6S5ZY48|G433_FUSSX Highly reducing polyketide synthase g433 OS=Fusarium sp. OX=29916 GN=g433 PE=2 SV=1	Aspergillus_nanangensis__gene-FE257_003073
Aspergillus_nanangensis__gene-FE257_003076	1	6588	hr_pks	100	BGC0001339__AMY15068.1	6.41e-64	41	hr_pks	sp|A0A3G1DJF3|SQHKS_PHOSM	6.58e-226	41.6	sp|A0A3G1DJF3|SQHKS_PHOSM Squalestatin hexaketide synthase OS=Phoma sp. (strain ATCC 20986 / MF5453) OX=1828523 GN=pks2 PE=2 SV=1	Aspergillus_nanangensis__gene-FE257_003076
Aspergillus_nanangensis__gene-FE257_003140	1	876	OTHER	100	BGC0002212__ESK96613.1	1.32e-11	25.4	OTHER	sp|P71019|FABD_BACSU	3.26e-29	35.4	sp|P71019|FABD_BACSU Malonyl CoA-acyl carrier protein transacylase OS=Bacillus subtilis (strain 168) OX=224308 GN=fabD PE=3 SV=2	Aspergillus_nanangensis__gene-FE257_003140
Aspergillus_nanangensis__gene-FE257_003186	1	8069	hr_pks	100	aspergillus_turcosus_gca_002234965__gene___CDV55_03573	2.74e-198	44.9	hr_pks	sp|N4WHE3|PKS1_COCH4	0	34.1	sp|N4WHE3|PKS1_COCH4 Reducing polyketide synthase PKS1 OS=Cochliobolus heterostrophus (strain C4 / ATCC 48331 / race T) OX=665024 GN=PKS1 PE=3 SV=1	Aspergillus_nanangensis__gene-FE257_003186
Aspergillus_nanangensis__gene-FE257_004523	1	8048	hr_pks	100	sp|A0A1W5T1T1|POXF_PENOX	3.75e-237	45.7	hr_pks	sp|G3XMD1|AZAB_ASPNA	0	40.9	sp|G3XMD1|AZAB_ASPNA Highly reducing polyketide synthase azaB OS=Aspergillus niger (strain ATCC 1015 / CBS 113.46 / FGSC A1144 / LSHB Ac4 / NCTC 3858a / NRRL 328 / USDA 3528.7) OX=380704 GN=azaB PE=1 SV=1	Aspergillus_nanangensis__gene-FE257_004523
Aspergillus_nanangensis__gene-FE257_004734	1	5451	OTHER	100	BGC0002229__OJJ97578.1	0	62.9	OTHER	sp|A0A1L9WN37|ACUA_ASPA1	0	58.1	sp|A0A1L9WN37|ACUA_ASPA1 6-methylsalicylic acid synthase acuA OS=Aspergillus aculeatus (strain ATCC 16872 / CBS 172.66 / WB 5094) OX=690307 GN=acuA PE=1 SV=1	Aspergillus_nanangensis__gene-FE257_004734
Aspergillus_nanangensis__gene-FE257_005530	1	1910	OTHER	100	BGC0002615__QBC75448.1	8.08e-16	28.1	OTHER	sp|O94297|OXSM_SCHPO	9e-51	52.8	sp|O94297|OXSM_SCHPO Putative 3-oxoacyl-[acyl-carrier-protein] synthase, mitochondrial OS=Schizosaccharomyces pombe (strain 972 / ATCC 24843) OX=284812 GN=SPBC887.13c PE=3 SV=1	Aspergillus_nanangensis__gene-FE257_005530
Aspergillus_nanangensis__gene-FE257_005848	1	6491	OUTLIER	*	None	None	None	None	sp|Q5AV07|ATNM_EMENI	0	45.6	sp|Q5AV07|ATNM_EMENI Fatty acid synthase beta subunit aflB OS=Emericella nidulans (strain FGSC A4 / ATCC 38163 / CBS 112.46 / NRRL 194 / M139) OX=227321 GN=atnM PE=2 SV=1	Aspergillus_nanangensis__gene-FE257_005848
Aspergillus_nanangensis__gene-FE257_006242	1	7544	hr_pks	100	Coleophoma_crateriformis__gene4908	1.63e-181	39.7	hr_pks	sp|S0DRI1|FUB1_GIBF5	2.2e-229	29.4	sp|S0DRI1|FUB1_GIBF5 Reducing polyketide synthase FUB1 OS=Gibberella fujikuroi (strain CBS 195.34 / IMI 58289 / NRRL A-6831) OX=1279085 GN=FUB1 PE=1 SV=1	Aspergillus_nanangensis__gene-FE257_006242
Aspergillus_nanangensis__gene-FE257_006541	1	7789	hr_pks	100	BGC0002731__QGW49095.1	6e-251	50.9	hr_pks	sp|A0A0U4ZX08|DRTA_ASPCI	0	48.2	sp|A0A0U4ZX08|DRTA_ASPCI Low-reducing polyketide synthase drtA OS=Aspergillus calidoustus OX=454130 GN=drtA PE=1 SV=1	Aspergillus_nanangensis__gene-FE257_006541
Aspergillus_nanangensis__gene-FE257_006781	1	8510	hr_pks	100	BGC0002525__BBU37368.1	2.91e-118	38.1	hr_pks	sp|A0A6S5ZY48|G433_FUSSX	0	39.3	sp|A0A6S5ZY48|G433_FUSSX Highly reducing polyketide synthase g433 OS=Fusarium sp. OX=29916 GN=g433 PE=2 SV=1	Aspergillus_nanangensis__gene-FE257_006781
Aspergillus_nanangensis__gene-FE257_006957	1	5501	OTHER	100	BGC0001118__EAL84397.1	0	77.8	OTHER	sp|Q4W944|ENCA_ASPFU	0	72.8	sp|Q4W944|ENCA_ASPFU Atrochrysone carboxylic acid synthase OS=Neosartorya fumigata (strain ATCC MYA-4609 / Af293 / CBS 101355 / FGSC A1100) OX=330879 GN=encA PE=1 SV=1	Aspergillus_nanangensis__gene-FE257_006957
Aspergillus_nanangensis__gene-FE257_006998	1	8098	hr_pks	100	BGC0001358__OAQ83765.1	4.93e-134	51	hr_pks	sp|A0A6S5ZY48|G433_FUSSX	4.03e-319	36.9	sp|A0A6S5ZY48|G433_FUSSX Highly reducing polyketide synthase g433 OS=Fusarium sp. OX=29916 GN=g433 PE=2 SV=1	Aspergillus_nanangensis__gene-FE257_006998
Aspergillus_nanangensis__gene-FE257_008089	1	9936	hr_pks	100	BGC0002234__EYE95336.1	3.68e-107	43.4	hr_pks	sp|D7UQ44|SOL1_ALTSO	2.84e-127	28.8	sp|D7UQ44|SOL1_ALTSO Prosolanapyrone synthase OS=Alternaria solani OX=48100 GN=sol1 PE=1 SV=1	Aspergillus_nanangensis__gene-FE257_008089
Aspergillus_nanangensis__gene-FE257_008118	1	10990	hr_pks	100	BGC0002268__QNH68024.1	8.98e-206	55.3	hr_pks	sp|Q5ATG8|APDA_EMENI	0	33.2	sp|Q5ATG8|APDA_EMENI Hybrid PKS-NRPS synthetase apdA OS=Emericella nidulans (strain FGSC A4 / ATCC 38163 / CBS 112.46 / NRRL 194 / M139) OX=227321 GN=apdA PE=1 SV=1	Aspergillus_nanangensis__gene-FE257_008118
Aspergillus_nanangensis__gene-FE257_008151	1	7952	hr_pks	99	sp|Q4WKW9|FGNA_ASPFU	1.29e-259	56.6	hr_pks	sp|A0A6S5ZY48|G433_FUSSX	0	36.8	sp|A0A6S5ZY48|G433_FUSSX Highly reducing polyketide synthase g433 OS=Fusarium sp. OX=29916 GN=g433 PE=2 SV=1	Aspergillus_nanangensis__gene-FE257_008151
Aspergillus_nanangensis__gene-FE257_008223	1	3951	OTHER	100	BGC0002255__AMJ52084.1	4.37e-290	49.8	OTHER	sp|Q0CF73|AZPB2_ASPTN	0	43.2	sp|Q0CF73|AZPB2_ASPTN Non-reducing polyketide synthase ATEG_07661 OS=Aspergillus terreus (strain NIH 2624 / FGSC A1156) OX=341663 GN=ATEG_07661 PE=1 SV=1	Aspergillus_nanangensis__gene-FE257_008223
Aspergillus_nanangensis__gene-FE257_008672	1	7578	hr_pks	100	BGC0002525__BBU37368.1	3.89e-266	49.8	hr_pks	sp|A0A6S5ZY48|G433_FUSSX	0	39.5	sp|A0A6S5ZY48|G433_FUSSX Highly reducing polyketide synthase g433 OS=Fusarium sp. OX=29916 GN=g433 PE=2 SV=1	Aspergillus_nanangensis__gene-FE257_008672
Aspergillus_nanangensis__gene-FE257_009723	1	7400	hr_pks	99.8	BGC0001141__AIA58899.1	1.29e-174	53.1	hr_pks	sp|A0A068ABB7|BREF7_EUPBR	0	47	sp|A0A068ABB7|BREF7_EUPBR Highly reducing polyketide synthase OS=Eupenicillium brefeldianum OX=1131482 GN=Bref-PKS PE=1 SV=1	Aspergillus_nanangensis__gene-FE257_009723
Aspergillus_nanangensis__gene-FE257_009858	1	7854	hr_pks	100	aspergillus_cristatus_gca_001717485__gene___SI65_09735	6.69e-199	49.8	hr_pks	sp|Q86ZD9|SQTKS_PHOSC	0	35.2	sp|Q86ZD9|SQTKS_PHOSC Squalestatin tetraketide synthase OS=Phoma sp. (strain C2932) OX=86977 GN=pks1 PE=1 SV=1	Aspergillus_nanangensis__gene-FE257_009858
Aspergillus_nanangensis__gene-FE257_010082	1	9680	hr_pks	100	sp|S7Z800|OPDA_PENO1	0	67	hr_pks	sp|A0A482N9V7|ICCA_TALVA	0	53.3	sp|A0A482N9V7|ICCA_TALVA Hybrid PKS-NRPS synthetase iccA OS=Talaromyces variabilis OX=28576 GN=iccA PE=1 SV=1	Aspergillus_nanangensis__gene-FE257_010082
Aspergillus_nanangensis__gene-FE257_010254	1	1601	hr_pks	100	BGC0002515__KAF9708863.1	8.96e-113	64.2	hr_pks	sp|D7UQ44|SOL1_ALTSO	2.4e-105	63.9	sp|D7UQ44|SOL1_ALTSO Prosolanapyrone synthase OS=Alternaria solani OX=48100 GN=sol1 PE=1 SV=1	Aspergillus_nanangensis__gene-FE257_010254
Aspergillus_nanangensis__gene-FE257_010255	1	6440	hr_pks	99.8	BGC0000146__BAJ09789.1	4.38e-123	51.8	hr_pks	sp|D7UQ44|SOL1_ALTSO	0	46.5	sp|D7UQ44|SOL1_ALTSO Prosolanapyrone synthase OS=Alternaria solani OX=48100 GN=sol1 PE=1 SV=1	Aspergillus_nanangensis__gene-FE257_010255
Aspergillus_nanangensis__gene-FE257_010261	1	11090	hr_pks	100	BGC0001264__BAQ25466.1	1.62e-166	51.4	hr_pks	sp|A0A0C6E0I7|BET1_NEOBT	0	41.7	sp|A0A0C6E0I7|BET1_NEOBT Highly reducing polyketide synthase bet1 OS=Neocamarosporium betae OX=1979465 GN=bet1 PE=1 SV=1	Aspergillus_nanangensis__gene-FE257_010261
Aspergillus_nanangensis__gene-FE257_010386	1	7578	hr_pks	100	Chlorociboria_aeruginascens__gene-B7494_g1069	1.82e-299	49.1	hr_pks	sp|A0A0D2YG10|FUB1_FUSO4	0	35.7	sp|A0A0D2YG10|FUB1_FUSO4 Reducing polyketide synthase FUB1 OS=Fusarium oxysporum f. sp. lycopersici (strain 4287 / CBS 123668 / FGSC 9935 / NRRL 34936) OX=426428 GN=FUB1 PE=1 SV=2	Aspergillus_nanangensis__gene-FE257_010386
Aspergillus_nanangensis__gene-FE257_010389	1	7241	hr_pks	100	sp|Q0CS88|TAZB_ASPTN	3.82e-205	45.7	hr_pks	sp|G4NEB1|NEC1_MAGO7	1.07e-167	39.2	sp|G4NEB1|NEC1_MAGO7 Highly reducing polyketide synthase NEC1 OS=Magnaporthe oryzae (strain 70-15 / ATCC MYA-4617 / FGSC 8958) OX=242507 GN=NEC1 PE=1 SV=1	Aspergillus_nanangensis__gene-FE257_010389
Aspergillus_nanangensis__gene-FE257_010689	1	12300	hr_pks	100	BGC0000983__EAW09117.1	0	78.6	hr_pks	sp|A1CLY8|CCSA_ASPCL	0	55.2	sp|A1CLY8|CCSA_ASPCL Polyketide synthase-nonribosomal peptide synthetase OS=Aspergillus clavatus (strain ATCC 1007 / CBS 513.65 / DSM 816 / NCTC 3887 / NRRL 1 / QM 1276 / 107) OX=344612 GN=ccsA PE=3 SV=1	Aspergillus_nanangensis__gene-FE257_010689
Aspergillus_nanangensis__gene-FE257_011360	1	6678	hr_pks	100	sp|A0A0N0DCA3|DEP5_FUSLA	2.87e-275	51.6	hr_pks	sp|A0A0N0DCA3|DEP5_FUSLA	0	35.7	sp|A0A0N0DCA3|DEP5_FUSLA Reducing polyketide synthase DEP5 OS=Fusarium langsethiae OX=179993 GN=DEP5 PE=2 SV=1	Aspergillus_nanangensis__gene-FE257_011360
Aspergillus_nanangensis__gene-FE257_011421	1	8188	hr_pks	100	BGC0002525__BBU37368.1	1.67e-76	29.4	hr_pks	sp|S3D9F1|GLOL_GLAL2	1.14e-290	29.2	sp|S3D9F1|GLOL_GLAL2 Highly reducing polyketide synthase gloL OS=Glarea lozoyensis (strain ATCC 20868 / MF5171) OX=1116229 GN=gloL PE=1 SV=1	Aspergillus_nanangensis__gene-FE257_011421
Aspergillus_nanangensis__gene-FE257_012580	1	1588	hr_pks	99.1	aspergillus_heteromorphus_cbs_117_55_gca_003184545__gene___BO70DRAFT_415288	7.43e-96	66.7	hr_pks	sp|A0A0A2JW91|CNSI_PENEN	1.5e-82	64.9	sp|A0A0A2JW91|CNSI_PENEN Highly reducing polyketide synthase cnsI OS=Penicillium expansum OX=27334 GN=cnsI PE=1 SV=1	Aspergillus_nanangensis__gene-FE257_012580
Aspergillus_nanangensis__gene-FE257_012581	1	4834	hr_pks	100	aspergillus_aculeatinus_cbs_121060_gca_003184765__gene___BO66DRAFT_460892	1.02e-77	57.3	hr_pks	sp|A0A0A2JW91|CNSI_PENEN	3.22e-265	44	sp|A0A0A2JW91|CNSI_PENEN Highly reducing polyketide synthase cnsI OS=Penicillium expansum OX=27334 GN=cnsI PE=1 SV=1	Aspergillus_nanangensis__gene-FE257_012581
Aspergillus_nidulans__gene1119	1	8040	hr_pks	100	BGC0002525__BBU37368.1	3.97e-153	41.7	hr_pks	sp|A0A6S5ZY48|G433_FUSSX	4.17e-273	39	sp|A0A6S5ZY48|G433_FUSSX Highly reducing polyketide synthase g433 OS=Fusarium sp. OX=29916 GN=g433 PE=2 SV=1	Aspergillus_nidulans__gene1119
Aspergillus_nidulans__gene1136	1	7821	OTHER	100	BGC0000037__CBF69451.1	7.32e-283	99.8	OTHER	sp|Q5AZ32|PKBA_EMENI	0	96.1	sp|Q5AZ32|PKBA_EMENI Non-reducing polyketide synthase pkbA OS=Emericella nidulans (strain FGSC A4 / ATCC 38163 / CBS 112.46 / NRRL 194 / M139) OX=227321 GN=pkbA PE=1 SV=1	Aspergillus_nidulans__gene1136
Aspergillus_nidulans__gene1204	1	6500	OUTLIER	*	None	None	None	None	sp|Q5AV07|ATNM_EMENI	0	91.1	sp|Q5AV07|ATNM_EMENI Fatty acid synthase beta subunit aflB OS=Emericella nidulans (strain FGSC A4 / ATCC 38163 / CBS 112.46 / NRRL 194 / M139) OX=227321 GN=atnM PE=2 SV=1	Aspergillus_nidulans__gene1204
Aspergillus_nidulans__gene1234	1	872	OTHER	100	sp|Q5AUX7|DBAI_EMENI	3.17e-205	100	OTHER	sp|Q5AUX7|DBAI_EMENI	4.83e-189	100	sp|Q5AUX7|DBAI_EMENI Non-reducing polyketide synthase dbaI OS=Emericella nidulans (strain FGSC A4 / ATCC 38163 / CBS 112.46 / NRRL 194 / M139) OX=227321 GN=dbaI PE=1 SV=2	Aspergillus_nidulans__gene1234
Aspergillus_nidulans__gene1240	1	6502	OTHER	100	BGC0000057__EAA59563.1	0	100	OTHER	sp|Q5AUX1|ORSA_EMENI	0	98.4	sp|Q5AUX1|ORSA_EMENI Orsellinic acid synthase OS=Emericella nidulans (strain FGSC A4 / ATCC 38163 / CBS 112.46 / NRRL 194 / M139) OX=227321 GN=orsA PE=1 SV=1	Aspergillus_nidulans__gene1240
Aspergillus_nidulans__gene1540	1	923	OTHER	100	BGC0000107__CBF74114.1	9.44e-224	100	OTHER	sp|Q03149|WA_EMENI	3.21e-208	100	sp|Q03149|WA_EMENI Conidial yellow pigment biosynthesis polyketide synthase OS=Emericella nidulans (strain FGSC A4 / ATCC 38163 / CBS 112.46 / NRRL 194 / M139) OX=227321 GN=wA PE=1 SV=2	Aspergillus_nidulans__gene1540
Aspergillus_nidulans__gene1764	1	8578	hr_pks	100	BGC0001373__BAV32159.1	1.56e-159	42.6	hr_pks	sp|Q5BA83|EASB_EMENI	1.9e-231	28.1	sp|Q5BA83|EASB_EMENI Highly reducing polyketide synthase easB OS=Emericella nidulans (strain FGSC A4 / ATCC 38163 / CBS 112.46 / NRRL 194 / M139) OX=227321 GN=easB PE=3 SV=1	Aspergillus_nidulans__gene1764
Aspergillus_nidulans__gene1766	1	7897	hr_pks	100	BGC0002525__BBU37368.1	2.05e-224	49.3	hr_pks	sp|S3D9F1|GLOL_GLAL2	0	37.7	sp|S3D9F1|GLOL_GLAL2 Highly reducing polyketide synthase gloL OS=Glarea lozoyensis (strain ATCC 20868 / MF5171) OX=1116229 GN=gloL PE=1 SV=1	Aspergillus_nidulans__gene1766
Aspergillus_nidulans__gene2740	1	1275	OTHER	100	BGC0002212__ESK96613.1	5.91e-13	25	OTHER	sp|P71019|FABD_BACSU	2.47e-38	33.7	sp|P71019|FABD_BACSU Malonyl CoA-acyl carrier protein transacylase OS=Bacillus subtilis (strain 168) OX=224308 GN=fabD PE=3 SV=2	Aspergillus_nidulans__gene2740
Aspergillus_nidulans__gene304	1	7884	hr_pks	100	BGC0001404__CAP95405.1	1.02e-282	51.2	hr_pks	sp|Q0CF75|AZPB1_ASPTN	0	49.6	sp|Q0CF75|AZPB1_ASPTN Highly reducing polyketide synthase ATEG_07659 OS=Aspergillus terreus (strain NIH 2624 / FGSC A1156) OX=341663 GN=ATEG_07659 PE=1 SV=1	Aspergillus_nidulans__gene304
Aspergillus_nidulans__gene3705	1	10520	hr_pks	100	BGC0002180__CBF82304.1	0	81.6	hr_pks	sp|C8VJR7|ALNA_EMENI	0	92.2	sp|C8VJR7|ALNA_EMENI Highly reducing polyketide synthase alnA OS=Emericella nidulans (strain FGSC A4 / ATCC 38163 / CBS 112.46 / NRRL 194 / M139) OX=227321 GN=alnA PE=1 SV=1	Aspergillus_nidulans__gene3705
Aspergillus_nidulans__gene4117	1	5920	OUTLIER	*	None	None	None	None	sp|Q00706|STCK_EMENI	0	90.9	sp|Q00706|STCK_EMENI Fatty acid synthase beta subunit stcK OS=Emericella nidulans (strain FGSC A4 / ATCC 38163 / CBS 112.46 / NRRL 194 / M139) OX=227321 GN=stcK PE=2 SV=2	Aspergillus_nidulans__gene4117
Aspergillus_nidulans__gene4128	1	7068	OTHER	100	sp|Q12397|STCA_EMENI	0	100	OTHER	sp|Q12397|STCA_EMENI	0	99.2	sp|Q12397|STCA_EMENI Norsolorinic acid synthase stcA OS=Emericella nidulans (strain FGSC A4 / ATCC 38163 / CBS 112.46 / NRRL 194 / M139) OX=227321 GN=stcA PE=2 SV=2	Aspergillus_nidulans__gene4128
Aspergillus_nidulans__gene4140	1	1594	hr_pks	99.8	penicillium_steckii_gca_002072375__gene___PENSTE_c011G09348	7.24e-16	51.8	hr_pks	sp|C8VJR7|ALNA_EMENI	2.15e-12	46.7	sp|C8VJR7|ALNA_EMENI Highly reducing polyketide synthase alnA OS=Emericella nidulans (strain FGSC A4 / ATCC 38163 / CBS 112.46 / NRRL 194 / M139) OX=227321 GN=alnA PE=1 SV=1	Aspergillus_nidulans__gene4140
Aspergillus_nidulans__gene4141	1	6843	hr_pks	100	lentithecium_fluviatile__estExt_Genewise1Plus.C_2_t10077	5.27e-82	44	hr_pks	sp|C8VJR7|ALNA_EMENI	4.86e-286	31.8	sp|C8VJR7|ALNA_EMENI Highly reducing polyketide synthase alnA OS=Emericella nidulans (strain FGSC A4 / ATCC 38163 / CBS 112.46 / NRRL 194 / M139) OX=227321 GN=alnA PE=1 SV=1	Aspergillus_nidulans__gene4141
Aspergillus_nidulans__gene4201	1	3716	hr_pks	100	BGC0001187__AKL78824.1	5.28e-46	72.2	hr_pks	sp|Q0CZH1|PYTA_ASPTN	2.66e-42	74.1	sp|Q0CZH1|PYTA_ASPTN Hybrid PKS-NRPS synthetase pytA (Fragment) OS=Aspergillus terreus (strain NIH 2624 / FGSC A1156) OX=341663 GN=pytA PE=2 SV=1	Aspergillus_nidulans__gene4201
Aspergillus_nidulans__gene4250	1	5963	OTHER	100	BGC0000013__CBF79143.1	0	95.6	OTHER	sp|Q5AXA9|PKGA_EMENI	0	74.8	sp|Q5AXA9|PKGA_EMENI Non-reducing polyketide synthase pkgA OS=Emericella nidulans (strain FGSC A4 / ATCC 38163 / CBS 112.46 / NRRL 194 / M139) OX=227321 GN=pkgA PE=1 SV=1	Aspergillus_nidulans__gene4250
Aspergillus_nidulans__gene4263	1	8077	hr_pks	100	BGC0001141__AIA58899.1	1.23e-187	46	hr_pks	sp|A0A068ABB7|BREF7_EUPBR	0	41.4	sp|A0A068ABB7|BREF7_EUPBR Highly reducing polyketide synthase OS=Eupenicillium brefeldianum OX=1131482 GN=Bref-PKS PE=1 SV=1	Aspergillus_nidulans__gene4263
Aspergillus_nidulans__gene4982	1	1241	hr_pks	100	sp|P0DUK1|PSPA_PENSO	4.12e-140	56	hr_pks	sp|P0DUK1|PSPA_PENSO	3.99e-130	56	sp|P0DUK1|PSPA_PENSO Highly reducing polyketide synthase pspA OS=Penicillium soppii OX=69789 GN=pspA PE=3 SV=1	Aspergillus_nidulans__gene4982
Aspergillus_nidulans__gene5919	1	6781	OTHER	100	BGC0001722__CBF83139.1	0	100	OTHER	sp|Q5B8A0|PKFA_EMENI	0	100	sp|Q5B8A0|PKFA_EMENI Non-reducing polyketide synthase pkfA OS=Emericella nidulans (strain FGSC A4 / ATCC 38163 / CBS 112.46 / NRRL 194 / M139) OX=227321 GN=pkfA PE=1 SV=1	Aspergillus_nidulans__gene5919
Aspergillus_nidulans__gene5962	1	5488	hr_pks	99.8	Lasiodiplodia_theobromae__gene-LTHEOB_11395	1.08e-27	50.9	hr_pks	sp|Q86ZD9|SQTKS_PHOSC	2.37e-292	44.9	sp|Q86ZD9|SQTKS_PHOSC Squalestatin tetraketide synthase OS=Phoma sp. (strain C2932) OX=86977 GN=pks1 PE=1 SV=1	Aspergillus_nidulans__gene5962
Aspergillus_nidulans__gene6075	1	7636	OTHER	100	sp|Q5B7U4|PKIA_EMENI	0	100	OTHER	sp|Q5B7U4|PKIA_EMENI	0	98.5	sp|Q5B7U4|PKIA_EMENI Non-reducing polyketide synthase pkiA OS=Emericella nidulans (strain FGSC A4 / ATCC 38163 / CBS 112.46 / NRRL 194 / M139) OX=227321 GN=pkiA PE=1 SV=1	Aspergillus_nidulans__gene6075
Aspergillus_nidulans__gene6199	1	7736	hr_pks	100	BGC0002525__BBU37368.1	7.42e-152	39.5	hr_pks	sp|A0A6S5ZY48|G433_FUSSX	9.01e-245	34.1	sp|A0A6S5ZY48|G433_FUSSX Highly reducing polyketide synthase g433 OS=Fusarium sp. OX=29916 GN=g433 PE=2 SV=1	Aspergillus_nidulans__gene6199
Aspergillus_nidulans__gene6294	1	8162	hr_pks	100	BGC0001358__OAQ83765.1	4.03e-127	56.9	hr_pks	sp|A0A6S5ZY48|G433_FUSSX	7.58e-251	31.6	sp|A0A6S5ZY48|G433_FUSSX Highly reducing polyketide synthase g433 OS=Fusarium sp. OX=29916 GN=g433 PE=2 SV=1	Aspergillus_nidulans__gene6294
Aspergillus_nidulans__gene6725	1	7859	hr_pks	100	BGC0001998__XP_659388.1	0	100	hr_pks	sp|A0A1U8QN18|SDGA_EMENI	0	100	sp|A0A1U8QN18|SDGA_EMENI Highly reducing polyketide synthase sdgA OS=Emericella nidulans (strain FGSC A4 / ATCC 38163 / CBS 112.46 / NRRL 194 / M139) OX=227321 GN=sdgA PE=1 SV=1	Aspergillus_nidulans__gene6725
Aspergillus_nidulans__gene688	1	5546	OTHER	100	BGC0000684__CBF70387.1	0	99.9	OTHER	sp|Q5B0D0|APTA_EMENI	0	74.1	sp|Q5B0D0|APTA_EMENI Non-reducing polyketide synthase aptA OS=Emericella nidulans (strain FGSC A4 / ATCC 38163 / CBS 112.46 / NRRL 194 / M139) OX=227321 GN=aptA PE=1 SV=1	Aspergillus_nidulans__gene688
Aspergillus_nidulans__gene6973	1	6752	OTHER	100	sp|Q5BBP8|PKHA_EMENI	0	92.9	OTHER	sp|Q5BBP8|PKHA_EMENI	0	98	sp|Q5BBP8|PKHA_EMENI Non-reducing polyketide synthase pkhA OS=Emericella nidulans (strain FGSC A4 / ATCC 38163 / CBS 112.46 / NRRL 194 / M139) OX=227321 GN=pkhA PE=1 SV=1	Aspergillus_nidulans__gene6973
Aspergillus_nidulans__gene6976	1	7785	hr_pks	100	sp|Q5BBP5|PKHB_EMENI	0	94.5	hr_pks	sp|Q5BBP5|PKHB_EMENI	0	98.1	sp|Q5BBP5|PKHB_EMENI Highly reducing polyketide synthase pkhB OS=Emericella nidulans (strain FGSC A4 / ATCC 38163 / CBS 112.46 / NRRL 194 / M139) OX=227321 GN=pkhB PE=1 SV=1	Aspergillus_nidulans__gene6976
Aspergillus_nidulans__gene7488	1	7895	hr_pks	100	BGC0001290__CBF87072.1	3.72e-302	61.1	hr_pks	sp|Q5BA83|EASB_EMENI	0	85.5	sp|Q5BA83|EASB_EMENI Highly reducing polyketide synthase easB OS=Emericella nidulans (strain FGSC A4 / ATCC 38163 / CBS 112.46 / NRRL 194 / M139) OX=227321 GN=easB PE=3 SV=1	Aspergillus_nidulans__gene7488
Aspergillus_nidulans__gene7728	1	6337	OUTLIER	*	None	None	None	None	sp|P34229|FAS1_YARLI	0	60.2	sp|P34229|FAS1_YARLI Fatty acid synthase subunit beta OS=Yarrowia lipolytica (strain CLIB 122 / E 150) OX=284591 GN=FAS1 PE=3 SV=2	Aspergillus_nidulans__gene7728
Aspergillus_nidulans__gene7880	1	5562	OTHER	100	sp|Q5BH30|MDPG_EMENI	0	100	OTHER	sp|Q5BH30|MDPG_EMENI	0	59.2	sp|Q5BH30|MDPG_EMENI Atrochrysone carboxylic acid synthase OS=Emericella nidulans (strain FGSC A4 / ATCC 38163 / CBS 112.46 / NRRL 194 / M139) OX=227321 GN=mdpG PE=3 SV=1	Aspergillus_nidulans__gene7880
Aspergillus_nidulans__gene8253	1	7970	OTHER	100	sp|Q5BG07|PKDA_EMENI	0	100	OTHER	sp|Q5BG07|PKDA_EMENI	0	99.9	sp|Q5BG07|PKDA_EMENI Non-reducing polyketide synthase pkdA OS=Emericella nidulans (strain FGSC A4 / ATCC 38163 / CBS 112.46 / NRRL 194 / M139) OX=227321 GN=pkdA PE=1 SV=1	Aspergillus_nidulans__gene8253
Aspergillus_nidulans__gene8764	1	8931	OTHER	100	BGC0000022__EAA65602.1	0	100	OTHER	sp|Q5BEJ6|AFOE_EMENI	0	93.9	sp|Q5BEJ6|AFOE_EMENI Iterative polyketide synthase afoE OS=Emericella nidulans (strain FGSC A4 / ATCC 38163 / CBS 112.46 / NRRL 194 / M139) OX=227321 GN=afoE PE=1 SV=1	Aspergillus_nidulans__gene8764
Aspergillus_nidulans__gene8766	1	8049	hr_pks	100	BGC0000022__EAA65604.1	0	90.3	hr_pks	sp|Q5BEJ4|AFOG_EMENI	0	87.8	sp|Q5BEJ4|AFOG_EMENI Asperfuranone polyketide synthase afoG OS=Emericella nidulans (strain FGSC A4 / ATCC 38163 / CBS 112.46 / NRRL 194 / M139) OX=227321 GN=afoG PE=1 SV=1	Aspergillus_nidulans__gene8766
Aspergillus_nidulans__gene9224	1	7734	OTHER	100	sp|Q5ATJ7|AUSA_EMENI	0	92.9	OTHER	sp|Q5ATJ7|AUSA_EMENI	0	99.8	sp|Q5ATJ7|AUSA_EMENI Non-reducing polyketide synthase ausA OS=Emericella nidulans (strain FGSC A4 / ATCC 38163 / CBS 112.46 / NRRL 194 / M139) OX=227321 GN=ausA PE=1 SV=1	Aspergillus_nidulans__gene9224
Aspergillus_nidulans__gene9253	1	11936	hr_pks	100	BGC0000959__CBF80487.1	0	100	hr_pks	sp|Q5ATG8|APDA_EMENI	0	100	sp|Q5ATG8|APDA_EMENI Hybrid PKS-NRPS synthetase apdA OS=Emericella nidulans (strain FGSC A4 / ATCC 38163 / CBS 112.46 / NRRL 194 / M139) OX=227321 GN=apdA PE=1 SV=1	Aspergillus_nidulans__gene9253
Aspergillus_oryzae__gene10087	1	5713	hr_pks	100	aspergillus_vadensis_cbs_113365_gca_003184925__gene___BO88DRAFT_454246	3.09e-91	43.8	hr_pks	sp|G4NEB1|NEC1_MAGO7	9.24e-109	28.7	sp|G4NEB1|NEC1_MAGO7 Highly reducing polyketide synthase NEC1 OS=Magnaporthe oryzae (strain 70-15 / ATCC MYA-4617 / FGSC 8958) OX=242507 GN=NEC1 PE=1 SV=1	Aspergillus_oryzae__gene10087
Aspergillus_oryzae__gene10193	1	8340	hr_pks	100	BGC0002525__BBU37368.1	2.13e-193	43.5	hr_pks	sp|A0A6S5ZY48|G433_FUSSX	1.88e-274	31.2	sp|A0A6S5ZY48|G433_FUSSX Highly reducing polyketide synthase g433 OS=Fusarium sp. OX=29916 GN=g433 PE=2 SV=1	Aspergillus_oryzae__gene10193
Aspergillus_oryzae__gene10759	1	7503	hr_pks	99.4	BGC0001141__AIA58899.1	7.03e-222	42.6	hr_pks	sp|A0A068ABB7|BREF7_EUPBR	0	39.9	sp|A0A068ABB7|BREF7_EUPBR Highly reducing polyketide synthase OS=Eupenicillium brefeldianum OX=1131482 GN=Bref-PKS PE=1 SV=1	Aspergillus_oryzae__gene10759
Aspergillus_oryzae__gene10781	1	6635	OUTLIER	*	None	None	None	None	sp|P34229|FAS1_YARLI	0	43.9	sp|P34229|FAS1_YARLI Fatty acid synthase subunit beta OS=Yarrowia lipolytica (strain CLIB 122 / E 150) OX=284591 GN=FAS1 PE=3 SV=2	Aspergillus_oryzae__gene10781
Aspergillus_oryzae__gene11688	1	5479	OTHER	100	sp|B8NYX0|FLUP_ASPFN	0	99.4	OTHER	sp|Q0CJ59|ATX_ASPTN	0	59.9	sp|Q0CJ59|ATX_ASPTN 6-methylsalicylic acid synthase OS=Aspergillus terreus (strain NIH 2624 / FGSC A1156) OX=341663 GN=atX PE=1 SV=1	Aspergillus_oryzae__gene11688
Aspergillus_oryzae__gene11954	1	5134	hr_pks	100	sp|P9WEQ0|OLCA_PENCN	6.23e-310	55.3	hr_pks	sp|A0A1V6NYI6|VERA_PENPO	0	42.8	sp|A0A1V6NYI6|VERA_PENPO Highly reducing polyketide synthase verA OS=Penicillium polonicum OX=60169 GN=verA PE=3 SV=1	Aspergillus_oryzae__gene11954
Aspergillus_oryzae__gene12030	1	2692	hr_pks	100	BGC0001892__ATZ45182.1	4.94e-50	69.5	hr_pks	sp|B1GVX7|BOA6_BOTFB	7.74e-47	69.5	sp|B1GVX7|BOA6_BOTFB Reducing polyketide synthase BOA6 OS=Botryotinia fuckeliana (strain B05.10) OX=332648 GN=BOA6 PE=2 SV=1	Aspergillus_oryzae__gene12030
Aspergillus_oryzae__gene12248	1	5999	OTHER	100	BGC0002236__BAE65965.1	0	100	OTHER	sp|S0DZM7|BIK1_GIBF5	0	48.8	sp|S0DZM7|BIK1_GIBF5 Bikaverin polyketide synthase bik1 OS=Gibberella fujikuroi (strain CBS 195.34 / IMI 58289 / NRRL A-6831) OX=1279085 GN=bik1 PE=1 SV=1	Aspergillus_oryzae__gene12248
Aspergillus_oryzae__gene123	1	8292	OTHER	100	BGC0000037__CBF69451.1	1.51e-102	34.6	OTHER	sp|Q0CRQ5|5MOAS_ASPTN	4.36e-159	31.1	sp|Q0CRQ5|5MOAS_ASPTN 5-methylorsellinic acid synthase OS=Aspergillus terreus (strain NIH 2624 / FGSC A1156) OX=341663 GN=ATEG_03629 PE=1 SV=1	Aspergillus_oryzae__gene123
Aspergillus_oryzae__gene12306	1	6421	OUTLIER	*	None	None	None	None	sp|A0A1U8QK63|PKIC_EMENI	0	53	sp|A0A1U8QK63|PKIC_EMENI Fatty acid synthase beta subunit pkiC OS=Emericella nidulans (strain FGSC A4 / ATCC 38163 / CBS 112.46 / NRRL 194 / M139) OX=227321 GN=pkiC PE=1 SV=1	Aspergillus_oryzae__gene12306
Aspergillus_oryzae__gene12311	1	7375	OTHER	100	sp|Q5B7U4|PKIA_EMENI	0	62.2	OTHER	sp|Q5B7U4|PKIA_EMENI	0	55.7	sp|Q5B7U4|PKIA_EMENI Non-reducing polyketide synthase pkiA OS=Emericella nidulans (strain FGSC A4 / ATCC 38163 / CBS 112.46 / NRRL 194 / M139) OX=227321 GN=pkiA PE=1 SV=1	Aspergillus_oryzae__gene12311
Aspergillus_oryzae__gene12352	1	6274	OUTLIER	*	None	None	None	None	sp|Q2TXG3|ORYB_ASPOR	0	98.7	sp|Q2TXG3|ORYB_ASPOR Fatty acid synthase subunit beta OS=Aspergillus oryzae (strain ATCC 42149 / RIB 40) OX=510516 GN=oryfasB PE=3 SV=1	Aspergillus_oryzae__gene12352
Aspergillus_oryzae__gene12566	1	7589	hr_pks	100	BGC0002525__BBU37368.1	9.39e-150	41.7	hr_pks	sp|A0A3G1DJF3|SQHKS_PHOSM	0	41.3	sp|A0A3G1DJF3|SQHKS_PHOSM Squalestatin hexaketide synthase OS=Phoma sp. (strain ATCC 20986 / MF5453) OX=1828523 GN=pks2 PE=2 SV=1	Aspergillus_oryzae__gene12566
Aspergillus_oryzae__gene12568	1	6762	OTHER	100	BGC0002255__AMJ52084.1	0	55.7	OTHER	sp|Q0CF73|AZPB2_ASPTN	0	42.6	sp|Q0CF73|AZPB2_ASPTN Non-reducing polyketide synthase ATEG_07661 OS=Aspergillus terreus (strain NIH 2624 / FGSC A1156) OX=341663 GN=ATEG_07661 PE=1 SV=1	Aspergillus_oryzae__gene12568
Aspergillus_oryzae__gene12923	1	1360	OTHER	100	BGC0002212__ESK96613.1	3.34e-15	24.5	OTHER	sp|P43712|FABD_HAEIN	1.39e-36	31.8	sp|P43712|FABD_HAEIN Malonyl CoA-acyl carrier protein transacylase OS=Haemophilus influenzae (strain ATCC 51907 / DSM 11121 / KW20 / Rd) OX=71421 GN=fabD PE=3 SV=1	Aspergillus_oryzae__gene12923
Aspergillus_oryzae__gene1391	1	4647	hr_pks	100	BGC0002525__BBU37368.1	1.85e-160	37.6	hr_pks	sp|A0A6S5ZY48|G433_FUSSX	4.3e-266	35	sp|A0A6S5ZY48|G433_FUSSX Highly reducing polyketide synthase g433 OS=Fusarium sp. OX=29916 GN=g433 PE=2 SV=1	Aspergillus_oryzae__gene1391
Aspergillus_oryzae__gene1546	1	6545	OTHER	100	BGC0001446__EED57518.1	0	92.6	OTHER	sp|B8MYS6|PKS27_ASPFN	0	79.7	sp|B8MYS6|PKS27_ASPFN Non-reducing polyketide synthase pks27 OS=Aspergillus flavus (strain ATCC 200026 / FGSC A1120 / IAM 13836 / NRRL 3357 / JCM 12722 / SRRC 167) OX=332952 GN=pks27 PE=1 SV=1	Aspergillus_oryzae__gene1546
Aspergillus_oryzae__gene2460	1	11982	hr_pks	100	BGC0001445__EED49862.1	0	99.8	hr_pks	sp|B8NJG3|LEPA_ASPFN	0	99.6	sp|B8NJG3|LEPA_ASPFN Hybrid PKS-NRPS synthetase lepA OS=Aspergillus flavus (strain ATCC 200026 / FGSC A1120 / IAM 13836 / NRRL 3357 / JCM 12722 / SRRC 167) OX=332952 GN=lepA PE=3 SV=1	Aspergillus_oryzae__gene2460
Aspergillus_oryzae__gene2473	1	7370	hr_pks	100	sp|A0A0E4AZP0|FSA1_FUSSF	8.84e-212	43.1	hr_pks	sp|Q5SBL6|FSDS_FUSHE	0	37.5	sp|Q5SBL6|FSDS_FUSHE Fusaridione A synthetase fsdS OS=Fusarium heterosporum OX=42747 GN=fsdS PE=3 SV=2	Aspergillus_oryzae__gene2473
Aspergillus_oryzae__gene2570	1	7872	OTHER	100	sp|Q5BG07|PKDA_EMENI	0	77	OTHER	sp|Q5BG07|PKDA_EMENI	0	66.9	sp|Q5BG07|PKDA_EMENI Non-reducing polyketide synthase pkdA OS=Emericella nidulans (strain FGSC A4 / ATCC 38163 / CBS 112.46 / NRRL 194 / M139) OX=227321 GN=pkdA PE=1 SV=1	Aspergillus_oryzae__gene2570
Aspergillus_oryzae__gene2677	1	5801	hr_pks	100	aspergillus_piperis_cbs_112811_gca_003184755__gene___BO85DRAFT_363683	5.03e-112	36.2	hr_pks	sp|G4NEB1|NEC1_MAGO7	2.83e-95	25.1	sp|G4NEB1|NEC1_MAGO7 Highly reducing polyketide synthase NEC1 OS=Magnaporthe oryzae (strain 70-15 / ATCC MYA-4617 / FGSC 8958) OX=242507 GN=NEC1 PE=1 SV=1	Aspergillus_oryzae__gene2677
Aspergillus_oryzae__gene2862	1	1910	OUTLIER	*	None	None	None	None	sp|Q8L3X9|KASM_ARATH	2.69e-50	35.2	sp|Q8L3X9|KASM_ARATH 3-oxoacyl-[acyl-carrier-protein] synthase, mitochondrial OS=Arabidopsis thaliana OX=3702 GN=KAS PE=1 SV=1	Aspergillus_oryzae__gene2862
Aspergillus_oryzae__gene4756	1	5447	OTHER	100	BGC0001304__EED53479.1	1.62e-302	99.8	OTHER	sp|B8N8R0|AFVB_ASPFN	0	96.9	sp|B8N8R0|AFVB_ASPFN Non-reducing polyketide synthase afvB OS=Aspergillus flavus (strain ATCC 200026 / FGSC A1120 / IAM 13836 / NRRL 3357 / JCM 12722 / SRRC 167) OX=332952 GN=afvB PE=2 SV=1	Aspergillus_oryzae__gene4756
Aspergillus_oryzae__gene50	1	8116	hr_pks	100	aspergillus_fumigatus__gene___AFUA_3G01410	8.97e-195	40.7	hr_pks	sp|N4WHE3|PKS1_COCH4	9.43e-281	31.1	sp|N4WHE3|PKS1_COCH4 Reducing polyketide synthase PKS1 OS=Cochliobolus heterostrophus (strain C4 / ATCC 48331 / race T) OX=665024 GN=PKS1 PE=3 SV=1	Aspergillus_oryzae__gene50
Aspergillus_oryzae__gene5173	1	7023	OTHER	100	BGC0001720__EJP62792.1	4.17e-87	46.1	OTHER	sp|J4UHQ6|OPS1_BEAB2	1.09e-224	32.4	sp|J4UHQ6|OPS1_BEAB2 Orsellinic acid synthase OS=Beauveria bassiana (strain ARSEF 2860) OX=655819 GN=OpS1 PE=1 SV=1	Aspergillus_oryzae__gene5173
Aspergillus_oryzae__gene5303	1	4209	hr_pks	100	BGC0000977__BAK26562.1	0	100	hr_pks	sp|B6F209|CPAS_ASPOZ	0	100	sp|B6F209|CPAS_ASPOZ Cyclo-acetoacetyl-L-tryptophan synthase OS=Aspergillus oryzae OX=5062 GN=cpaA PE=1 SV=1	Aspergillus_oryzae__gene5303
Aspergillus_oryzae__gene5313	1	6624	OTHER	100	BGC0000004__BAE71314.1	0	100	OTHER	sp|Q12053|AFLC_ASPPU	0	83.4	sp|Q12053|AFLC_ASPPU Norsolorinic acid synthase OS=Aspergillus parasiticus (strain ATCC 56775 / NRRL 5862 / SRRC 143 / SU-1) OX=1403190 GN=aflC PE=1 SV=1	Aspergillus_oryzae__gene5313
Aspergillus_oryzae__gene5317	1	5847	OUTLIER	*	None	None	None	None	sp|Q8TGA1|AFLB_ASPPU	0	85.7	sp|Q8TGA1|AFLB_ASPPU Fatty acid synthase beta subunit aflB OS=Aspergillus parasiticus (strain ATCC 56775 / NRRL 5862 / SRRC 143 / SU-1) OX=1403190 GN=aflB PE=2 SV=1	Aspergillus_oryzae__gene5317
Aspergillus_oryzae__gene5462	1	7352	hr_pks	100	BGC0002729__EAA36364.1	2.53e-213	43.8	hr_pks	sp|Q7SHI6|SRDA_NEUCR	0	38.7	sp|Q7SHI6|SRDA_NEUCR Highly reducing polyketide synthase srdA OS=Neurospora crassa (strain ATCC 24698 / 74-OR23-1A / CBS 708.71 / DSM 1257 / FGSC 987) OX=367110 GN=srdA PE=2 SV=1	Aspergillus_oryzae__gene5462
Aspergillus_oryzae__gene69	1	9062	hr_pks	100	BGC0001358__OAQ83765.1	4.2e-134	61.6	hr_pks	sp|A0A6S5ZY48|G433_FUSSX	0	39.4	sp|A0A6S5ZY48|G433_FUSSX Highly reducing polyketide synthase g433 OS=Fusarium sp. OX=29916 GN=g433 PE=2 SV=1	Aspergillus_oryzae__gene69
Aspergillus_oryzae__gene7236	1	5858	hr_pks	100	BGC0002238__BAE61265.1	0	100	hr_pks	sp|Q2UB00|PPSB_ASPOR	0	100	sp|Q2UB00|PPSB_ASPOR Reducing polyketide synthase ppsB OS=Aspergillus oryzae (strain ATCC 42149 / RIB 40) OX=510516 GN=ppsB PE=3 SV=1	Aspergillus_oryzae__gene7236
Aspergillus_oryzae__gene74	1	3538	hr_pks	100	tolypocladium_capitatum_gca_002901185__gene___TCAP_03221	7.18e-38	49.7	hr_pks	sp|N4WHE3|PKS1_COCH4	7.39e-39	33.8	sp|N4WHE3|PKS1_COCH4 Reducing polyketide synthase PKS1 OS=Cochliobolus heterostrophus (strain C4 / ATCC 48331 / race T) OX=665024 GN=PKS1 PE=3 SV=1	Aspergillus_oryzae__gene74
Aspergillus_oryzae__gene7557	1	6651	OTHER	100	BGC0002175__BAE61567.1	0	100	OTHER	sp|A0A1L9UCG2|ALBA_ASPBC	0	79.6	sp|A0A1L9UCG2|ALBA_ASPBC Non-reducing polyketide synthase albA OS=Aspergillus brasiliensis (strain CBS 101740 / IMI 381727 / IBT 21946) OX=767769 GN=albA PE=3 SV=1	Aspergillus_oryzae__gene7557
Aspergillus_oryzae__gene8279	1	6075	OTHER	100	BGC0002237__BAE62229.1	0	100	OTHER	sp|Q5AXA9|PKGA_EMENI	0	77.2	sp|Q5AXA9|PKGA_EMENI Non-reducing polyketide synthase pkgA OS=Emericella nidulans (strain FGSC A4 / ATCC 38163 / CBS 112.46 / NRRL 194 / M139) OX=227321 GN=pkgA PE=1 SV=1	Aspergillus_oryzae__gene8279
Aspergillus_oryzae__gene8533	1	7375	hr_pks	100	BGC0001404__CAP95405.1	8.99e-314	58.5	hr_pks	sp|G0R6S8|SORA_HYPJQ	0	48.8	sp|G0R6S8|SORA_HYPJQ Highly reducing polyketide synthase sor1 OS=Hypocrea jecorina (strain QM6a) OX=431241 GN=sor1 PE=2 SV=1	Aspergillus_oryzae__gene8533
Aspergillus_oryzae__gene8537	1	6738	OTHER	100	BGC0002255__AMJ52084.1	0	63.1	OTHER	sp|Q0CF73|AZPB2_ASPTN	0	41.3	sp|Q0CF73|AZPB2_ASPTN Non-reducing polyketide synthase ATEG_07661 OS=Aspergillus terreus (strain NIH 2624 / FGSC A1156) OX=341663 GN=ATEG_07661 PE=1 SV=1	Aspergillus_oryzae__gene8537
Aspergillus_oryzae__gene8690	1	6570	OUTLIER	*	None	None	None	None	sp|P34229|FAS1_YARLI	0	59.9	sp|P34229|FAS1_YARLI Fatty acid synthase subunit beta OS=Yarrowia lipolytica (strain CLIB 122 / E 150) OX=284591 GN=FAS1 PE=3 SV=2	Aspergillus_oryzae__gene8690
Aspergillus_oryzae__gene9348	1	3793	hr_pks	100	BGC0001124__EHA19289.1	0	66.3	hr_pks	sp|A5ABG0|PYNA_ASPNC	0	62.2	sp|A5ABG0|PYNA_ASPNC Hybrid PKS-NRPS synthetase pynA OS=Aspergillus niger (strain CBS 513.88 / FGSC A1513) OX=425011 GN=pynA PE=1 SV=1	Aspergillus_oryzae__gene9348
Aspergillus_oryzae__gene9517	1	2934	hr_pks	100	penicillium_nalgiovense_gca_002072425__gene___PENNAL_c0003G00472	2.74e-140	42.7	hr_pks	sp|Q8J0F5|MLCB_PENCI	1.25e-81	32.5	sp|Q8J0F5|MLCB_PENCI Compactin diketide synthase mlcB OS=Penicillium citrinum OX=5077 GN=mlcB PE=1 SV=1	Aspergillus_oryzae__gene9517
Aspergillus_thermomutatus__gene1655	1	8151	OTHER	100	BGC0001827__AWM95789.1	0	65.4	OTHER	sp|A0A4P8GHJ1|EUPA_PHOSX	0	59.6	sp|A0A4P8GHJ1|EUPA_PHOSX 3-methylorcinaldehyde synthase OS=Phoma sp. OX=1707701 GN=eupA PE=1 SV=1	Aspergillus_thermomutatus__gene1655
Aspergillus_thermomutatus__gene1680__renamed0032	1	8141	hr_pks	100	Aspergillus_thermomutatus__gene1680	4.73e-191	58.1	hr_pks	sp|N4WHE3|PKS1_COCH4	1.44e-217	32.8	sp|N4WHE3|PKS1_COCH4 Reducing polyketide synthase PKS1 OS=Cochliobolus heterostrophus (strain C4 / ATCC 48331 / race T) OX=665024 GN=PKS1 PE=3 SV=1	Aspergillus_thermomutatus__gene1680
Aspergillus_thermomutatus__gene2147	1	3061	hr_pks	100	sp|A0A1W5T1T1|POXF_PENOX	1.09e-168	55.4	hr_pks	sp|A0A1W5T1T1|POXF_PENOX	2.77e-155	55.4	sp|A0A1W5T1T1|POXF_PENOX Highly reducing polyketide synthase poxF OS=Penicillium oxalicum OX=69781 GN=poxF PE=2 SV=1	Aspergillus_thermomutatus__gene2147
Aspergillus_thermomutatus__gene2936	1	6640	OTHER	100	sp|Q4WZA8|ALB1_ASPFU	0	94.9	OTHER	sp|Q4WZA8|ALB1_ASPFU	0	79.7	sp|Q4WZA8|ALB1_ASPFU Conidial pigment polyketide synthase alb1 OS=Neosartorya fumigata (strain ATCC MYA-4609 / Af293 / CBS 101355 / FGSC A1100) OX=330879 GN=alb1 PE=1 SV=1	Aspergillus_thermomutatus__gene2936
Aspergillus_thermomutatus__gene2980	1	8610	hr_pks	100	BGC0002222__BBU42026.1	4.62e-103	59.1	hr_pks	sp|A0A3G1DJH7|SQTKS_PHOSM	0	33.8	sp|A0A3G1DJH7|SQTKS_PHOSM Squalestatin tetraketide synthase OS=Phoma sp. (strain ATCC 20986 / MF5453) OX=1828523 GN=pks1 PE=1 SV=1	Aspergillus_thermomutatus__gene2980
Aspergillus_thermomutatus__gene354	1	5595	OTHER	100	BGC0002604__BBG67008.1	0	87.5	OTHER	sp|Q0CRQ5|5MOAS_ASPTN	0	39.5	sp|Q0CRQ5|5MOAS_ASPTN 5-methylorsellinic acid synthase OS=Aspergillus terreus (strain NIH 2624 / FGSC A1156) OX=341663 GN=ATEG_03629 PE=1 SV=1	Aspergillus_thermomutatus__gene354
Aspergillus_thermomutatus__gene3668	1	5581	OTHER	100	sp|A1D8I9|NSCA_NEOFI	0	90.9	OTHER	sp|A1D8I9|NSCA_NEOFI	0	89	sp|A1D8I9|NSCA_NEOFI Non-reducing polyketide synthase nscA OS=Neosartorya fischeri (strain ATCC 1020 / DSM 3700 / CBS 544.65 / FGSC A1164 / JCM 1740 / NRRL 181 / WB 181) OX=331117 GN=nscA PE=3 SV=1	Aspergillus_thermomutatus__gene3668
Aspergillus_thermomutatus__gene4024	1	11512	hr_pks	100	BGC0000062__AAD43562.2	2.21e-144	34.6	hr_pks	sp|S3D9F1|GLOL_GLAL2	0	37.2	sp|S3D9F1|GLOL_GLAL2 Highly reducing polyketide synthase gloL OS=Glarea lozoyensis (strain ATCC 20868 / MF5171) OX=1116229 GN=gloL PE=1 SV=1	Aspergillus_thermomutatus__gene4024
Aspergillus_thermomutatus__gene4201	1	7814	hr_pks	100	BGC0001404__CAP95405.1	7.65e-268	53.9	hr_pks	sp|G0R6S8|SORA_HYPJQ	0	47.5	sp|G0R6S8|SORA_HYPJQ Highly reducing polyketide synthase sor1 OS=Hypocrea jecorina (strain QM6a) OX=431241 GN=sor1 PE=2 SV=1	Aspergillus_thermomutatus__gene4201
Aspergillus_thermomutatus__gene4205	1	6621	OTHER	100	BGC0002255__AMJ52084.1	0	63.8	OTHER	sp|A0A0K0MCJ4|CAZM_CHAGB	0	43.4	sp|A0A0K0MCJ4|CAZM_CHAGB Iterative polyketide synthase CazM OS=Chaetomium globosum (strain ATCC 6205 / CBS 148.51 / DSM 1962 / NBRC 6347 / NRRL 1970) OX=306901 GN=cazM PE=1 SV=1	Aspergillus_thermomutatus__gene4205
Aspergillus_thermomutatus__gene4262	1	3667	hr_pks	100	BGC0002196__QBK15047.1	3.32e-75	38.6	hr_pks	sp|A0A481WR96|CLAI_PENCR	9.78e-71	28.1	sp|A0A481WR96|CLAI_PENCR Highly reducing polyketide synthase claI OS=Penicillium crustosum OX=36656 GN=claI PE=3 SV=1	Aspergillus_thermomutatus__gene4262
Aspergillus_thermomutatus__gene4802	1	6597	OTHER	100	BGC0000057__EAA59563.1	0	74.1	OTHER	sp|Q5AUX1|ORSA_EMENI	0	53.5	sp|Q5AUX1|ORSA_EMENI Orsellinic acid synthase OS=Emericella nidulans (strain FGSC A4 / ATCC 38163 / CBS 112.46 / NRRL 194 / M139) OX=227321 GN=orsA PE=1 SV=1	Aspergillus_thermomutatus__gene4802
Aspergillus_thermomutatus__gene4832	1	11832	hr_pks	100	BGC0002169__OJJ98486.1	7.43e-321	60.3	hr_pks	sp|A0A6J4B487|LUC5_FUSSX	0	47.9	sp|A0A6J4B487|LUC5_FUSSX Hybrid PKS-NRPS synthetase LUC5 OS=Fusarium sp. OX=29916 GN=LUC5 PE=3 SV=1	Aspergillus_thermomutatus__gene4832
Aspergillus_thermomutatus__gene4988	1	6331	OUTLIER	*	None	None	None	None	sp|P34229|FAS1_YARLI	0	59.8	sp|P34229|FAS1_YARLI Fatty acid synthase subunit beta OS=Yarrowia lipolytica (strain CLIB 122 / E 150) OX=284591 GN=FAS1 PE=3 SV=2	Aspergillus_thermomutatus__gene4988
Aspergillus_thermomutatus__gene5017	1	11672	hr_pks	100	sp|A0A2Z5TM64|HIMA_ASPJA	0	69	hr_pks	sp|A0A2Z5TM64|HIMA_ASPJA	0	49.6	sp|A0A2Z5TM64|HIMA_ASPJA Polyketide synthase-nonribosomal peptide synthetase hybrid himA OS=Aspergillus japonicus OX=34381 GN=himA PE=3 SV=1	Aspergillus_thermomutatus__gene5017
Aspergillus_thermomutatus__gene5113	1	18317	OTHER	100	BGC0000045__AGC95321.1	2.78e-133	62.3	OTHER	sp|L7XAV2|CURS2_ASPTE	3.7e-183	38.6	sp|L7XAV2|CURS2_ASPTE Non-reducing polyketide synthase curS2 OS=Aspergillus terreus OX=33178 GN=curS2 PE=1 SV=1	Aspergillus_thermomutatus__gene5113
Aspergillus_thermomutatus__gene5819	1	12460	hr_pks	100	sp|S0DS59|EQXS_GIBF5	2.09e-198	42.4	hr_pks	sp|A0A7L8UVC9|FFSA_ASPFV	0	37.4	sp|A0A7L8UVC9|FFSA_ASPFV Polyketide synthase-nonribosomal peptide synthetase ffsA OS=Aspergillus flavipes OX=41900 GN=ffsA PE=3 SV=1	Aspergillus_thermomutatus__gene5819
Aspergillus_thermomutatus__gene5940	1	6725	OTHER	100	sp|A7UMW1|PKS1_ELSFA	8.56e-303	53	OTHER	sp|F9XMW3|PKS1_ZYMTI	0	44	sp|F9XMW3|PKS1_ZYMTI Non-reducing polyketide synthase PKS1 OS=Zymoseptoria tritici (strain CBS 115943 / IPO323) OX=336722 GN=PKS1 PE=3 SV=1	Aspergillus_thermomutatus__gene5940
Aspergillus_thermomutatus__gene5994	1	893	hr_pks	100	colletotrichum_nymphaeae_sa_01_gca_001563115__gene___CNYM01_01551	5.87e-58	72	hr_pks	sp|A0A1B4XBH3|SDNO_SORAA	3.34e-26	47.9	sp|A0A1B4XBH3|SDNO_SORAA Highly reducing polyketide synthase sdnO OS=Sordaria araneosa OX=573841 GN=sdnO PE=3 SV=1	Aspergillus_thermomutatus__gene5994
Aspergillus_thermomutatus__gene6005	1	11868	hr_pks	100	sp|G2Q9A5|MYCA_MYCTT	1.54e-301	57.5	hr_pks	sp|A0A1W5T1U1|POXE_PENOX	0	48.4	sp|A0A1W5T1U1|POXE_PENOX Hybrid PKS-NRPS synthetase poxE OS=Penicillium oxalicum OX=69781 GN=poxE PE=2 SV=1	Aspergillus_thermomutatus__gene6005
Aspergillus_thermomutatus__gene636	1	8413	hr_pks	100	dibaeis_baeomyces__gene_5150	1.68e-249	51.5	hr_pks	sp|A0A0U5GK88|AUSV_ASPCI	2.92e-317	31.9	sp|A0A0U5GK88|AUSV_ASPCI Highly reducing polyketide synthase ausV OS=Aspergillus calidoustus OX=454130 GN=ausV PE=1 SV=1	Aspergillus_thermomutatus__gene636
Aspergillus_thermomutatus__gene665	1	8593	hr_pks	100	aspergillus_vadensis_cbs_113365_gca_003184925__gene___BO88DRAFT_454246	4.02e-150	44.8	hr_pks	sp|G4NEB1|NEC1_MAGO7	6.45e-134	28.7	sp|G4NEB1|NEC1_MAGO7 Highly reducing polyketide synthase NEC1 OS=Magnaporthe oryzae (strain 70-15 / ATCC MYA-4617 / FGSC 8958) OX=242507 GN=NEC1 PE=1 SV=1	Aspergillus_thermomutatus__gene665
Aspergillus_thermomutatus__gene6739	1	10151	hr_pks	100	BGC0001141__AIA58899.1	2.24e-154	63.1	hr_pks	sp|A0A068ABB7|BREF7_EUPBR	1.52e-298	39.2	sp|A0A068ABB7|BREF7_EUPBR Highly reducing polyketide synthase OS=Eupenicillium brefeldianum OX=1131482 GN=Bref-PKS PE=1 SV=1	Aspergillus_thermomutatus__gene6739
Aspergillus_thermomutatus__gene7001	1	7738	hr_pks	100	sp|Q2HBN0|CGHG_CHAGB	6.14e-144	59.1	hr_pks	sp|S0DS59|EQXS_GIBF5	0	36.9	sp|S0DS59|EQXS_GIBF5 Trichosetin synthetase PKS-NRPS1 OS=Gibberella fujikuroi (strain CBS 195.34 / IMI 58289 / NRRL A-6831) OX=1279085 GN=PKS-NRPS1 PE=2 SV=1	Aspergillus_thermomutatus__gene7001
Aspergillus_thermomutatus__gene723	1	634	hr_pks	100	sp|A0A0E4AZP0|FSA1_FUSSF	2.74e-103	69.6	hr_pks	sp|A0A0E4AZP0|FSA1_FUSSF	5.96e-99	69.9	sp|A0A0E4AZP0|FSA1_FUSSF Hybrid PKS-NRPS synthetase fsa1 OS=Fusarium sp. (strain FN080326) OX=1608308 GN=fsa1 PE=3 SV=1	Aspergillus_thermomutatus__gene723
Aspergillus_thermomutatus__gene7497	1	3837	OTHER	100	BGC0001244__AIW00670.1	7.86e-18	26.1	OTHER	sp|O94297|OXSM_SCHPO	8.95e-84	50.3	sp|O94297|OXSM_SCHPO Putative 3-oxoacyl-[acyl-carrier-protein] synthase, mitochondrial OS=Schizosaccharomyces pombe (strain 972 / ATCC 24843) OX=284812 GN=SPBC887.13c PE=3 SV=1	Aspergillus_thermomutatus__gene7497
Aspergillus_thermomutatus__gene8442	1	2652	hr_pks	100	BGC0001874__AFA26384.1	0	61.6	hr_pks	sp|B6F209|CPAS_ASPOZ	0	60.3	sp|B6F209|CPAS_ASPOZ Cyclo-acetoacetyl-L-tryptophan synthase OS=Aspergillus oryzae OX=5062 GN=cpaA PE=1 SV=1	Aspergillus_thermomutatus__gene8442
Aspergillus_thermomutatus__gene8569	1	7171	hr_pks	100	colletotrichum_nymphaeae_sa_01_gca_001563115__gene___CNYM01_01551	6.41e-63	60.3	hr_pks	sp|Q0CF75|AZPB1_ASPTN	4.38e-88	37.1	sp|Q0CF75|AZPB1_ASPTN Highly reducing polyketide synthase ATEG_07659 OS=Aspergillus terreus (strain NIH 2624 / FGSC A1156) OX=341663 GN=ATEG_07659 PE=1 SV=1	Aspergillus_thermomutatus__gene8569
Aspergillus_thermomutatus__gene8774	1	7384	hr_pks	100	BGC0000129__EAL89230.2	0	91.1	hr_pks	sp|Q4WLD4|PYR2_ASPFU	0	83.4	sp|Q4WLD4|PYR2_ASPFU Non-reducing polyketide synthase pyr2 OS=Neosartorya fumigata (strain ATCC MYA-4609 / Af293 / CBS 101355 / FGSC A1100) OX=330879 GN=pyr2 PE=1 SV=2	Aspergillus_thermomutatus__gene8774
Aspergillus_thermomutatus__gene9061	1	876	OTHER	100	BGC0002212__ESK96613.1	2.96e-13	28.6	OTHER	sp|P71019|FABD_BACSU	3.33e-25	35	sp|P71019|FABD_BACSU Malonyl CoA-acyl carrier protein transacylase OS=Bacillus subtilis (strain 168) OX=224308 GN=fabD PE=3 SV=2	Aspergillus_thermomutatus__gene9061
Aspergillus_thermomutatus__gene9465	1	7587	hr_pks	100	sp|P0DUK1|PSPA_PENSO	3.41e-208	51.7	hr_pks	sp|A0A6S5ZY48|G433_FUSSX	0	42.7	sp|A0A6S5ZY48|G433_FUSSX Highly reducing polyketide synthase g433 OS=Fusarium sp. OX=29916 GN=g433 PE=2 SV=1	Aspergillus_thermomutatus__gene9465
Aspergillus_thermomutatus__gene9612	1	8071	hr_pks	100	BGC0002139__KAF5858310.1	0	90.1	hr_pks	sp|I1S166|FSL1_GIBZE	0	51.8	sp|I1S166|FSL1_GIBZE Fusarielin synthase FSL1 OS=Gibberella zeae (strain ATCC MYA-4620 / CBS 123657 / FGSC 9075 / NRRL 31084 / PH-1) OX=229533 GN=FSL1 PE=2 SV=1	Aspergillus_thermomutatus__gene9612
Aspergillus_ustus__gene-HK57_00003	1	7510	hr_pks	100	BGC0002729__EAA36364.1	3.65e-166	49.3	hr_pks	sp|Q7SHI6|SRDA_NEUCR	0	40.3	sp|Q7SHI6|SRDA_NEUCR Highly reducing polyketide synthase srdA OS=Neurospora crassa (strain ATCC 24698 / 74-OR23-1A / CBS 708.71 / DSM 1257 / FGSC 987) OX=367110 GN=srdA PE=2 SV=1	Aspergillus_ustus__gene-HK57_00003
Aspergillus_ustus__gene-HK57_00039	1	8494	hr_pks	100	coniochaeta_ligniaria_nrrl_30616_gca_001879275__gene___CONLIGDRAFT_63350	2.26e-148	55.1	hr_pks	sp|Q5KTM9|ALT5_ALTSO	1.59e-318	32.1	sp|Q5KTM9|ALT5_ALTSO Highly reducing polyketide synthase alt5 OS=Alternaria solani OX=48100 GN=alt5 PE=1 SV=1	Aspergillus_ustus__gene-HK57_00039
Aspergillus_ustus__gene-HK57_00083	1	8120	hr_pks	100	BGC0002525__BBU37368.1	6.04e-209	48.2	hr_pks	sp|A0A6S5ZY48|G433_FUSSX	0	35.7	sp|A0A6S5ZY48|G433_FUSSX Highly reducing polyketide synthase g433 OS=Fusarium sp. OX=29916 GN=g433 PE=2 SV=1	Aspergillus_ustus__gene-HK57_00083
Aspergillus_ustus__gene-HK57_00140	1	5218	OTHER	100	BGC0002603__BBG28471.1	0	70.8	OTHER	sp|K2QVI8|DPMPA_MACPH	1.97e-307	36.7	sp|K2QVI8|DPMPA_MACPH Non-reducing polyketide synthase dpmpA OS=Macrophomina phaseolina (strain MS6) OX=1126212 GN=dpmpA PE=1 SV=1	Aspergillus_ustus__gene-HK57_00140
Aspergillus_ustus__gene-HK57_00158	1	8199	hr_pks	100	Cenococcum_geophilum__gene9356	4.53e-74	31.3	hr_pks	sp|G4NEB1|NEC1_MAGO7	1.81e-151	28.2	sp|G4NEB1|NEC1_MAGO7 Highly reducing polyketide synthase NEC1 OS=Magnaporthe oryzae (strain 70-15 / ATCC MYA-4617 / FGSC 8958) OX=242507 GN=NEC1 PE=1 SV=1	Aspergillus_ustus__gene-HK57_00158
Aspergillus_ustus__gene-HK57_00196	1	7127	OTHER	100	BGC0000037__CBF69451.1	0	65.2	OTHER	sp|Q5AZ32|PKBA_EMENI	0	61.2	sp|Q5AZ32|PKBA_EMENI Non-reducing polyketide synthase pkbA OS=Emericella nidulans (strain FGSC A4 / ATCC 38163 / CBS 112.46 / NRRL 194 / M139) OX=227321 GN=pkbA PE=1 SV=1	Aspergillus_ustus__gene-HK57_00196
Aspergillus_ustus__gene-HK57_00201	1	4462	hr_pks	100	sp|A0A0E4AZP0|FSA1_FUSSF	1.58e-102	48.9	hr_pks	sp|A0A0E4AZP0|FSA1_FUSSF	2.5e-200	45.7	sp|A0A0E4AZP0|FSA1_FUSSF Hybrid PKS-NRPS synthetase fsa1 OS=Fusarium sp. (strain FN080326) OX=1608308 GN=fsa1 PE=3 SV=1	Aspergillus_ustus__gene-HK57_00201
Aspergillus_ustus__gene-HK57_00202	1	5566	OTHER	100	sp|M3A326|PKS81_PSEFD	0	76	OTHER	sp|M3A326|PKS81_PSEFD	0	66.8	sp|M3A326|PKS81_PSEFD Non-reducing polyketide synthase PKS8-1 OS=Pseudocercospora fijiensis (strain CIRAD86) OX=383855 GN=PKS8-1 PE=2 SV=1	Aspergillus_ustus__gene-HK57_00202
Aspergillus_ustus__gene-HK57_00218	1	7918	hr_pks	100	Lasiodiplodia_theobromae__gene-LTHEOB_11395	4.95e-259	48.4	hr_pks	sp|Q86ZD9|SQTKS_PHOSC	0	38.6	sp|Q86ZD9|SQTKS_PHOSC Squalestatin tetraketide synthase OS=Phoma sp. (strain C2932) OX=86977 GN=pks1 PE=1 SV=1	Aspergillus_ustus__gene-HK57_00218
Aspergillus_ustus__gene-HK57_00226	1	6972	OTHER	100	BGC0002614__BCP96883.1	3.19e-317	57.3	OTHER	sp|Q0CRQ5|5MOAS_ASPTN	0	36.3	sp|Q0CRQ5|5MOAS_ASPTN 5-methylorsellinic acid synthase OS=Aspergillus terreus (strain NIH 2624 / FGSC A1156) OX=341663 GN=ATEG_03629 PE=1 SV=1	Aspergillus_ustus__gene-HK57_00226
Aspergillus_ustus__gene-HK57_00237	1	7343	hr_pks	100	BGC0002240__KFG78606.1	0	61.1	hr_pks	sp|P0DUT7|BA17A_METAN	0	48.2	sp|P0DUT7|BA17A_METAN Highly reducing polyketide synthase 17 OS=Metarhizium anisopliae OX=5530 GN=Ba17a PE=1 SV=1	Aspergillus_ustus__gene-HK57_00237
Aspergillus_ustus__gene-HK57_00242	1	7688	OTHER	100	sp|Q5B7U4|PKIA_EMENI	0	72.1	OTHER	sp|Q5B7U4|PKIA_EMENI	0	67.1	sp|Q5B7U4|PKIA_EMENI Non-reducing polyketide synthase pkiA OS=Emericella nidulans (strain FGSC A4 / ATCC 38163 / CBS 112.46 / NRRL 194 / M139) OX=227321 GN=pkiA PE=1 SV=1	Aspergillus_ustus__gene-HK57_00242
Aspergillus_ustus__gene-HK57_00272	1	1833	hr_pks	100	aspergillus_turcosus_gca_002234965__gene___CDV55_03573	2.13e-82	65.4	hr_pks	sp|N4WHE3|PKS1_COCH4	3.77e-62	60.8	sp|N4WHE3|PKS1_COCH4 Reducing polyketide synthase PKS1 OS=Cochliobolus heterostrophus (strain C4 / ATCC 48331 / race T) OX=665024 GN=PKS1 PE=3 SV=1	Aspergillus_ustus__gene-HK57_00272
Aspergillus_ustus__gene-HK57_00273	1	1060	hr_pks	100	Aspergillus_thermomutatus__gene1680	4.07e-65	51.4	hr_pks	sp|A0A0N7D4P6|DHC3_ALTCI	6.99e-41	39	sp|A0A0N7D4P6|DHC3_ALTCI Highly reducing polyketide synthase Dhc3 OS=Alternaria cinerariae OX=216837 GN=Dhc3 PE=2 SV=1	Aspergillus_ustus__gene-HK57_00273
Aspergillus_ustus__gene-HK57_00312	1	10725	hr_pks	100	BGC0002180__CBF82304.1	0	73.2	hr_pks	sp|C8VJR7|ALNA_EMENI	0	73.8	sp|C8VJR7|ALNA_EMENI Highly reducing polyketide synthase alnA OS=Emericella nidulans (strain FGSC A4 / ATCC 38163 / CBS 112.46 / NRRL 194 / M139) OX=227321 GN=alnA PE=1 SV=1	Aspergillus_ustus__gene-HK57_00312
Aspergillus_ustus__gene-HK57_00332	1	9618	OTHER	100	BGC0002161__ETS82099.1	1.36e-150	58.9	OTHER	sp|A7UMW1|PKS1_ELSFA	4.23e-272	30.8	sp|A7UMW1|PKS1_ELSFA Non-reducing polyketide synthase 1 OS=Elsinoe fawcettii OX=40997 GN=PKS1 PE=2 SV=1	Aspergillus_ustus__gene-HK57_00332
Aspergillus_ustus__gene-HK57_00348	1	8123	hr_pks	100	BGC0001358__OAQ83765.1	4.09e-73	55.3	hr_pks	sp|S3D9F1|GLOL_GLAL2	1.06e-309	32.5	sp|S3D9F1|GLOL_GLAL2 Highly reducing polyketide synthase gloL OS=Glarea lozoyensis (strain ATCC 20868 / MF5171) OX=1116229 GN=gloL PE=1 SV=1	Aspergillus_ustus__gene-HK57_00348
Aspergillus_ustus__gene-HK57_00352	1	6387	OTHER	100	BGC0002301__QDK64760.1	0	69.3	OTHER	sp|A0A1B5L6A0|USTP_USTVR	0	56.2	sp|A0A1B5L6A0|USTP_USTVR Non-reducing polyketide synthase ustP OS=Ustilaginoidea virens OX=1159556 GN=UVI_02036160 PE=1 SV=1	Aspergillus_ustus__gene-HK57_00352
Aspergillus_ustus__gene-HK57_00362	1	5662	OTHER	100	BGC0000168__ADI24926.1	0	71.3	OTHER	sp|D7PHZ2|VRTA_PENAE	0	66.4	sp|D7PHZ2|VRTA_PENAE Non-reducing polyketide synthase vrtA OS=Penicillium aethiopicum OX=36650 GN=vrtA PE=1 SV=1	Aspergillus_ustus__gene-HK57_00362
Aspergillus_ustus__gene-HK57_00400	1	7868	hr_pks	100	BGC0002233__EHK18438.1	1.78e-214	57.7	hr_pks	sp|G9N4B2|VIRA_HYPVG	0	57.8	sp|G9N4B2|VIRA_HYPVG Highly reducing polyketide synthase virA OS=Hypocrea virens (strain Gv29-8 / FGSC 10586) OX=413071 GN=virA PE=1 SV=1	Aspergillus_ustus__gene-HK57_00400
Aspergillus_ustus__gene-HK57_00426	1	8564	hr_pks	100	BGC0001358__OAQ83765.1	1.67e-105	49.6	hr_pks	sp|S3D9F1|GLOL_GLAL2	5.21e-281	31.8	sp|S3D9F1|GLOL_GLAL2 Highly reducing polyketide synthase gloL OS=Glarea lozoyensis (strain ATCC 20868 / MF5171) OX=1116229 GN=gloL PE=1 SV=1	Aspergillus_ustus__gene-HK57_00426
Aspergillus_ustus__gene-HK57_00437	1	8859	hr_pks	100	Aspergillus_kawachii__gene9341	4.15e-212	54.4	hr_pks	sp|Q5KTM9|ALT5_ALTSO	1.43e-201	25.5	sp|Q5KTM9|ALT5_ALTSO Highly reducing polyketide synthase alt5 OS=Alternaria solani OX=48100 GN=alt5 PE=1 SV=1	Aspergillus_ustus__gene-HK57_00437
Aspergillus_ustus__gene-HK57_00450	1	6702	OTHER	100	BGC0001722__CBF83139.1	0	70.3	OTHER	sp|Q5B8A0|PKFA_EMENI	0	65.4	sp|Q5B8A0|PKFA_EMENI Non-reducing polyketide synthase pkfA OS=Emericella nidulans (strain FGSC A4 / ATCC 38163 / CBS 112.46 / NRRL 194 / M139) OX=227321 GN=pkfA PE=1 SV=1	Aspergillus_ustus__gene-HK57_00450
Aspergillus_ustus__gene-HK57_00536	1	8180	hr_pks	100	BGC0002266__CEN60541.1	9.49e-167	45.5	hr_pks	sp|A0A0U4ZX08|DRTA_ASPCI	0	48.8	sp|A0A0U4ZX08|DRTA_ASPCI Low-reducing polyketide synthase drtA OS=Aspergillus calidoustus OX=454130 GN=drtA PE=1 SV=1	Aspergillus_ustus__gene-HK57_00536
Aspergillus_ustus__gene-HK57_00555	1	5861	OUTLIER	*	None	None	None	None	sp|Q00706|STCK_EMENI	0	60.7	sp|Q00706|STCK_EMENI Fatty acid synthase beta subunit stcK OS=Emericella nidulans (strain FGSC A4 / ATCC 38163 / CBS 112.46 / NRRL 194 / M139) OX=227321 GN=stcK PE=2 SV=2	Aspergillus_ustus__gene-HK57_00555
Aspergillus_ustus__gene-HK57_00566	1	6835	OTHER	100	sp|Q12397|STCA_EMENI	0	86.1	OTHER	sp|Q12397|STCA_EMENI	0	81.5	sp|Q12397|STCA_EMENI Norsolorinic acid synthase stcA OS=Emericella nidulans (strain FGSC A4 / ATCC 38163 / CBS 112.46 / NRRL 194 / M139) OX=227321 GN=stcA PE=2 SV=2	Aspergillus_ustus__gene-HK57_00566
Aspergillus_ustus__gene-HK57_00585__renamed0038	1	8780	hr_pks	100	Aspergillus_ustus__gene-HK57_00585	0	91.2	hr_pks	sp|Q86ZD9|SQTKS_PHOSC	0	42.6	sp|Q86ZD9|SQTKS_PHOSC Squalestatin tetraketide synthase OS=Phoma sp. (strain C2932) OX=86977 GN=pks1 PE=1 SV=1	Aspergillus_ustus__gene-HK57_00585
Aspergillus_ustus__gene-HK57_00598	1	7797	hr_pks	100	BGC0002525__BBU37368.1	2.44e-210	51.7	hr_pks	sp|S3D9F1|GLOL_GLAL2	0	31.7	sp|S3D9F1|GLOL_GLAL2 Highly reducing polyketide synthase gloL OS=Glarea lozoyensis (strain ATCC 20868 / MF5171) OX=1116229 GN=gloL PE=1 SV=1	Aspergillus_ustus__gene-HK57_00598
Aspergillus_ustus__gene-HK57_00600	1	8665	hr_pks	100	BGC0001373__BAV32159.1	1.38e-160	44.3	hr_pks	sp|Q5BA83|EASB_EMENI	4.68e-218	27.4	sp|Q5BA83|EASB_EMENI Highly reducing polyketide synthase easB OS=Emericella nidulans (strain FGSC A4 / ATCC 38163 / CBS 112.46 / NRRL 194 / M139) OX=227321 GN=easB PE=3 SV=1	Aspergillus_ustus__gene-HK57_00600
Aspergillus_ustus__gene-HK57_00609	1	7940	OTHER	100	BGC0000104__ADY00130.1	4.66e-108	50	OTHER	sp|A0A1Y0BRF1|ADRD_PENRO	1.91e-304	31.8	sp|A0A1Y0BRF1|ADRD_PENRO Non-reducing polyketide synthase adrD OS=Penicillium roqueforti OX=5082 GN=adrD PE=3 SV=1	Aspergillus_ustus__gene-HK57_00609
Aspergillus_ustus__gene-HK57_00629	1	6505	OTHER	100	sp|P9WES9|LECAS_PSEFF	2.81e-128	58.3	OTHER	sp|E9KMQ2|GRA1_CLAGR	9.87e-260	36.8	sp|E9KMQ2|GRA1_CLAGR Non-reducing polyketide synthase PKS16 OS=Cladonia grayi OX=27339 GN=PKS16 PE=2 SV=1	Aspergillus_ustus__gene-HK57_00629
Aspergillus_ustus__gene-HK57_00634__renamed0039	1	7360	hr_pks	100	Aspergillus_ustus__gene-HK57_00634	0	100	hr_pks	sp|A0A4P8DJV2|DMXL2_CRYX8	0	43.1	sp|A0A4P8DJV2|DMXL2_CRYX8 Highly reducing polyketide synthase dmxL2 OS=Cryptosporiopsis sp. (strain 8999) OX=2572248 GN=dmxL2 PE=3 SV=1	Aspergillus_ustus__gene-HK57_00634
Aspergillus_ustus__gene-HK57_00655	1	7157	OTHER	100	BGC0002209__KIA75596.1	0	100	OTHER	sp|Q5AZ32|PKBA_EMENI	0	43.9	sp|Q5AZ32|PKBA_EMENI Non-reducing polyketide synthase pkbA OS=Emericella nidulans (strain FGSC A4 / ATCC 38163 / CBS 112.46 / NRRL 194 / M139) OX=227321 GN=pkbA PE=1 SV=1	Aspergillus_ustus__gene-HK57_00655
Aspergillus_ustus__gene-HK57_00681	1	7797	hr_pks	100	sp|P0DUK1|PSPA_PENSO	2.07e-132	41.2	hr_pks	sp|P0DUK1|PSPA_PENSO	0	35.5	sp|P0DUK1|PSPA_PENSO Highly reducing polyketide synthase pspA OS=Penicillium soppii OX=69789 GN=pspA PE=3 SV=1	Aspergillus_ustus__gene-HK57_00681
Aspergillus_ustus__gene-HK57_00684	1	7946	hr_pks	100	BGC0001290__CBF87072.1	1.46e-241	76.2	hr_pks	sp|Q5BA83|EASB_EMENI	0	74.3	sp|Q5BA83|EASB_EMENI Highly reducing polyketide synthase easB OS=Emericella nidulans (strain FGSC A4 / ATCC 38163 / CBS 112.46 / NRRL 194 / M139) OX=227321 GN=easB PE=3 SV=1	Aspergillus_ustus__gene-HK57_00684
Aspergillus_ustus__gene-HK57_00707	1	5536	OTHER	100	BGC0000684__CBF70387.1	0	79	OTHER	sp|Q5B0D0|APTA_EMENI	0	76.7	sp|Q5B0D0|APTA_EMENI Non-reducing polyketide synthase aptA OS=Emericella nidulans (strain FGSC A4 / ATCC 38163 / CBS 112.46 / NRRL 194 / M139) OX=227321 GN=aptA PE=1 SV=1	Aspergillus_ustus__gene-HK57_00707
Aspergillus_welwitschiae__gene10023	1	11936	hr_pks	100	BGC0001857__QBE85649.1	1.39e-225	55	hr_pks	sp|A0A411L027|BUAA_ASPBU	0	38.6	sp|A0A411L027|BUAA_ASPBU Hybrid PKS-NRPS synthetase buaA OS=Aspergillus burnettii OX=2508778 GN=buaA PE=3 SV=1	Aspergillus_welwitschiae__gene10023
Aspergillus_welwitschiae__gene10878	1	8168	hr_pks	100	BGC0002525__BBU37368.1	2.31e-112	37.2	hr_pks	sp|S3D9F1|GLOL_GLAL2	2.5e-227	28.2	sp|S3D9F1|GLOL_GLAL2 Highly reducing polyketide synthase gloL OS=Glarea lozoyensis (strain ATCC 20868 / MF5171) OX=1116229 GN=gloL PE=1 SV=1	Aspergillus_welwitschiae__gene10878
Aspergillus_welwitschiae__gene11099	1	6664	OTHER	100	BGC0001578__EED21099.1	2.41e-265	64.2	OTHER	sp|A0A142C799|PHNA_PENHR	0	42.7	sp|A0A142C799|PHNA_PENHR Non-reducing polyketide synthase phnA OS=Penicillium herquei OX=69774 GN=phnA PE=1 SV=1	Aspergillus_welwitschiae__gene11099
Aspergillus_welwitschiae__gene11127	1	8475	hr_pks	100	aspergillus_vadensis_cbs_113365_gca_003184925__gene___BO88DRAFT_454246	1.21e-254	48	hr_pks	sp|Q86ZD9|SQTKS_PHOSC	3.71e-239	27.6	sp|Q86ZD9|SQTKS_PHOSC Squalestatin tetraketide synthase OS=Phoma sp. (strain C2932) OX=86977 GN=pks1 PE=1 SV=1	Aspergillus_welwitschiae__gene11127
Aspergillus_welwitschiae__gene11305	1	7066	hr_pks	100	aspergillus_eucalypticola_cbs_122712_gca_003184535__gene___BO83DRAFT_449894	0	88.8	hr_pks	sp|N4WHE3|PKS1_COCH4	2.36e-317	31.8	sp|N4WHE3|PKS1_COCH4 Reducing polyketide synthase PKS1 OS=Cochliobolus heterostrophus (strain C4 / ATCC 48331 / race T) OX=665024 GN=PKS1 PE=3 SV=1	Aspergillus_welwitschiae__gene11305
Aspergillus_welwitschiae__gene11397	1	6465	OTHER	100	BGC0002255__AMJ52084.1	3.87e-315	54.8	OTHER	sp|Q5B8A0|PKFA_EMENI	0	39.9	sp|Q5B8A0|PKFA_EMENI Non-reducing polyketide synthase pkfA OS=Emericella nidulans (strain FGSC A4 / ATCC 38163 / CBS 112.46 / NRRL 194 / M139) OX=227321 GN=pkfA PE=1 SV=1	Aspergillus_welwitschiae__gene11397
Aspergillus_welwitschiae__gene11974	1	8493	hr_pks	100	aspergillus_calidoustus_gca_001511075__gene___ASPCAL07647	5.79e-200	42.6	hr_pks	sp|A0A3G9GQ29|CDME_TALVE	2.82e-190	30.2	sp|A0A3G9GQ29|CDME_TALVE 6-hydroxymellein synthase cdmE OS=Talaromyces verruculosus OX=198730 GN=cdmE PE=1 SV=1	Aspergillus_welwitschiae__gene11974
Aspergillus_welwitschiae__gene12452	1	8278	OTHER	100	BGC0002734__EAU35431.1	1.28e-245	47.8	OTHER	sp|Q0CRQ5|5MOAS_ASPTN	0	38.7	sp|Q0CRQ5|5MOAS_ASPTN 5-methylorsellinic acid synthase OS=Aspergillus terreus (strain NIH 2624 / FGSC A1156) OX=341663 GN=ATEG_03629 PE=1 SV=1	Aspergillus_welwitschiae__gene12452
Aspergillus_welwitschiae__gene12598	1	7257	OUTLIER	*	None	None	None	None	sp|P34229|FAS1_YARLI	0	59.6	sp|P34229|FAS1_YARLI Fatty acid synthase subunit beta OS=Yarrowia lipolytica (strain CLIB 122 / E 150) OX=284591 GN=FAS1 PE=3 SV=2	Aspergillus_welwitschiae__gene12598
Aspergillus_welwitschiae__gene13167	1	8223	OTHER	100	BGC0002483__AUW31052.1	1.15e-154	40.9	OTHER	sp|Q0CRQ5|5MOAS_ASPTN	2.74e-310	33.6	sp|Q0CRQ5|5MOAS_ASPTN 5-methylorsellinic acid synthase OS=Aspergillus terreus (strain NIH 2624 / FGSC A1156) OX=341663 GN=ATEG_03629 PE=1 SV=1	Aspergillus_welwitschiae__gene13167
Aspergillus_welwitschiae__gene1359	1	12145	hr_pks	100	BGC0002197__QBK15049.1	0	69.6	hr_pks	sp|A0A481WNP4|TRAA_PENCR	0	65.3	sp|A0A481WNP4|TRAA_PENCR Hybrid PKS-NRPS synthetase traA OS=Penicillium crustosum OX=36656 GN=traA PE=3 SV=1	Aspergillus_welwitschiae__gene1359
Aspergillus_welwitschiae__gene1728	1	8577	OTHER	100	BGC0002171__EHA27898.1	0	98.7	OTHER	sp|G3XNF4|ATPKS_ASPNA	0	98	sp|G3XNF4|ATPKS_ASPNA PKS-NRPS hybrid synthetase ATPKS OS=Aspergillus niger (strain ATCC 1015 / CBS 113.46 / FGSC A1144 / LSHB Ac4 / NCTC 3858a / NRRL 328 / USDA 3528.7) OX=380704 GN=ATPKS PE=1 SV=1	Aspergillus_welwitschiae__gene1728
Aspergillus_welwitschiae__gene1995	1	11967	hr_pks	100	BGC0000992__AAV66110.2	4.97e-156	44.9	hr_pks	sp|Q5SBL6|FSDS_FUSHE	0	39	sp|Q5SBL6|FSDS_FUSHE Fusaridione A synthetase fsdS OS=Fusarium heterosporum OX=42747 GN=fsdS PE=3 SV=2	Aspergillus_welwitschiae__gene1995
Aspergillus_welwitschiae__gene2281	1	8305	hr_pks	100	aspergillus_calidoustus_gca_001511075__gene___ASPCAL07647	1.17e-115	54.5	hr_pks	sp|G4NEB1|NEC1_MAGO7	2.73e-184	31.3	sp|G4NEB1|NEC1_MAGO7 Highly reducing polyketide synthase NEC1 OS=Magnaporthe oryzae (strain 70-15 / ATCC MYA-4617 / FGSC 8958) OX=242507 GN=NEC1 PE=1 SV=1	Aspergillus_welwitschiae__gene2281
Aspergillus_welwitschiae__gene2454	1	8225	hr_pks	100	aspergillus_calidoustus_gca_001511075__gene___ASPCAL07647	2.98e-185	44.1	hr_pks	sp|G3XMD1|AZAB_ASPNA	0	34.8	sp|G3XMD1|AZAB_ASPNA Highly reducing polyketide synthase azaB OS=Aspergillus niger (strain ATCC 1015 / CBS 113.46 / FGSC A1144 / LSHB Ac4 / NCTC 3858a / NRRL 328 / USDA 3528.7) OX=380704 GN=azaB PE=1 SV=1	Aspergillus_welwitschiae__gene2454
Aspergillus_welwitschiae__gene2534	1	7565	hr_pks	100	BGC0002515__KAF9708863.1	3.51e-151	50.7	hr_pks	sp|D7UQ44|SOL1_ALTSO	0	43.9	sp|D7UQ44|SOL1_ALTSO Prosolanapyrone synthase OS=Alternaria solani OX=48100 GN=sol1 PE=1 SV=1	Aspergillus_welwitschiae__gene2534
Aspergillus_welwitschiae__gene2873	1	7411	hr_pks	100	sp|A0A0N0DCA3|DEP5_FUSLA	3.82e-122	48.1	hr_pks	sp|A0A0N0DCA3|DEP5_FUSLA	8.92e-163	31.5	sp|A0A0N0DCA3|DEP5_FUSLA Reducing polyketide synthase DEP5 OS=Fusarium langsethiae OX=179993 GN=DEP5 PE=2 SV=1	Aspergillus_welwitschiae__gene2873
Aspergillus_welwitschiae__gene2875	1	7986	hr_pks	100	BGC0000062__AAD43562.2	0	62.7	hr_pks	sp|S3D9F1|GLOL_GLAL2	0	51.7	sp|S3D9F1|GLOL_GLAL2 Highly reducing polyketide synthase gloL OS=Glarea lozoyensis (strain ATCC 20868 / MF5171) OX=1116229 GN=gloL PE=1 SV=1	Aspergillus_welwitschiae__gene2875
Aspergillus_welwitschiae__gene3030	1	8668	hr_pks	100	dibaeis_baeomyces__gene_5150	7.81e-99	34.5	hr_pks	sp|Q8J0F5|MLCB_PENCI	4.94e-271	31.3	sp|Q8J0F5|MLCB_PENCI Compactin diketide synthase mlcB OS=Penicillium citrinum OX=5077 GN=mlcB PE=1 SV=1	Aspergillus_welwitschiae__gene3030
Aspergillus_welwitschiae__gene3058	1	9312	hr_pks	100	BGC0002525__BBU37368.1	6.06e-94	34.4	hr_pks	sp|A0A6S5ZY48|G433_FUSSX	0	35.1	sp|A0A6S5ZY48|G433_FUSSX Highly reducing polyketide synthase g433 OS=Fusarium sp. OX=29916 GN=g433 PE=2 SV=1	Aspergillus_welwitschiae__gene3058
Aspergillus_welwitschiae__gene3364	1	11853	hr_pks	100	BGC0001124__EHA19289.1	0	98.7	hr_pks	sp|A5ABG0|PYNA_ASPNC	0	97.8	sp|A5ABG0|PYNA_ASPNC Hybrid PKS-NRPS synthetase pynA OS=Aspergillus niger (strain CBS 513.88 / FGSC A1513) OX=425011 GN=pynA PE=1 SV=1	Aspergillus_welwitschiae__gene3364
Aspergillus_welwitschiae__gene3460	1	7462	hr_pks	100	aspergillus_aculeatinus_cbs_121060_gca_003184765__gene___BO66DRAFT_460892	8.81e-251	60.2	hr_pks	sp|A0A0A2JW91|CNSI_PENEN	0	40.2	sp|A0A0A2JW91|CNSI_PENEN Highly reducing polyketide synthase cnsI OS=Penicillium expansum OX=27334 GN=cnsI PE=1 SV=1	Aspergillus_welwitschiae__gene3460
Aspergillus_welwitschiae__gene3569	1	7712	hr_pks	100	BGC0002525__BBU37368.1	3.33e-273	51.2	hr_pks	sp|A0A6S5ZY48|G433_FUSSX	0	44.5	sp|A0A6S5ZY48|G433_FUSSX Highly reducing polyketide synthase g433 OS=Fusarium sp. OX=29916 GN=g433 PE=2 SV=1	Aspergillus_welwitschiae__gene3569
Aspergillus_welwitschiae__gene3702	1	5382	OTHER	100	BGC0000156__AEN83889.1	0	99.3	OTHER	sp|A2QX22|ADAA_ASPNC	0	98.9	sp|A2QX22|ADAA_ASPNC Non-reducing polyketide synthase adaA OS=Aspergillus niger (strain CBS 513.88 / FGSC A1513) OX=425011 GN=adaA PE=1 SV=1	Aspergillus_welwitschiae__gene3702
Aspergillus_welwitschiae__gene3792	1	8952	hr_pks	100	BGC0001724__EPS29069.1	8.13e-264	52.3	hr_pks	sp|A1CLY8|CCSA_ASPCL	0	36.6	sp|A1CLY8|CCSA_ASPCL Polyketide synthase-nonribosomal peptide synthetase OS=Aspergillus clavatus (strain ATCC 1007 / CBS 513.65 / DSM 816 / NCTC 3887 / NRRL 1 / QM 1276 / 107) OX=344612 GN=ccsA PE=3 SV=1	Aspergillus_welwitschiae__gene3792
Aspergillus_welwitschiae__gene4067	1	7766	OTHER	100	sp|Q5B7U4|PKIA_EMENI	0	62.1	OTHER	sp|Q5B7U4|PKIA_EMENI	0	55.9	sp|Q5B7U4|PKIA_EMENI Non-reducing polyketide synthase pkiA OS=Emericella nidulans (strain FGSC A4 / ATCC 38163 / CBS 112.46 / NRRL 194 / M139) OX=227321 GN=pkiA PE=1 SV=1	Aspergillus_welwitschiae__gene4067
Aspergillus_welwitschiae__gene4070	1	6513	OUTLIER	*	None	None	None	None	sp|A0A1U8QK63|PKIC_EMENI	0	54.7	sp|A0A1U8QK63|PKIC_EMENI Fatty acid synthase beta subunit pkiC OS=Emericella nidulans (strain FGSC A4 / ATCC 38163 / CBS 112.46 / NRRL 194 / M139) OX=227321 GN=pkiC PE=1 SV=1	Aspergillus_welwitschiae__gene4070
Aspergillus_welwitschiae__gene4100	1	9003	hr_pks	100	BGC0002525__BBU37368.1	1.13e-177	47	hr_pks	sp|S3D9F1|GLOL_GLAL2	0	41.6	sp|S3D9F1|GLOL_GLAL2 Highly reducing polyketide synthase gloL OS=Glarea lozoyensis (strain ATCC 20868 / MF5171) OX=1116229 GN=gloL PE=1 SV=1	Aspergillus_welwitschiae__gene4100
Aspergillus_welwitschiae__gene4105	1	7465	hr_pks	100	aspergillus_aculeatinus_cbs_121060_gca_003184765__gene___BO66DRAFT_460892	1.47e-226	54.4	hr_pks	sp|A0A0A2JW91|CNSI_PENEN	0	43.1	sp|A0A0A2JW91|CNSI_PENEN Highly reducing polyketide synthase cnsI OS=Penicillium expansum OX=27334 GN=cnsI PE=1 SV=1	Aspergillus_welwitschiae__gene4105
Aspergillus_welwitschiae__gene4574	1	5340	OTHER	100	BGC0000170__EHA22196.1	0	99	OTHER	sp|G3Y419|YANA_ASPNA	0	98.7	sp|G3Y419|YANA_ASPNA 6-methylsalicylic acid synthase OS=Aspergillus niger (strain ATCC 1015 / CBS 113.46 / FGSC A1144 / LSHB Ac4 / NCTC 3858a / NRRL 328 / USDA 3528.7) OX=380704 GN=yanA PE=1 SV=1	Aspergillus_welwitschiae__gene4574
Aspergillus_welwitschiae__gene4628	1	6840	OUTLIER	*	None	None	None	None	sp|Q5AV07|ATNM_EMENI	0	41.6	sp|Q5AV07|ATNM_EMENI Fatty acid synthase beta subunit aflB OS=Emericella nidulans (strain FGSC A4 / ATCC 38163 / CBS 112.46 / NRRL 194 / M139) OX=227321 GN=atnM PE=2 SV=1	Aspergillus_welwitschiae__gene4628
Aspergillus_welwitschiae__gene4963	1	11960	hr_pks	100	BGC0002210__FAA01291.1	0	72	hr_pks	sp|A0A2V5GX43|PYVA_ASPV1	0	60.7	sp|A0A2V5GX43|PYVA_ASPV1 Hybrid PKS-NRPS synthetase pyvA OS=Aspergillus violaceofuscus (strain CBS 115571) OX=1450538 GN=pyvA PE=3 SV=1	Aspergillus_welwitschiae__gene4963
Aspergillus_welwitschiae__gene5901	1	1569	OTHER	100	BGC0002212__ESK96613.1	9.09e-16	26.9	OTHER	sp|P71019|FABD_BACSU	1.3e-38	35.2	sp|P71019|FABD_BACSU Malonyl CoA-acyl carrier protein transacylase OS=Bacillus subtilis (strain 168) OX=224308 GN=fabD PE=3 SV=2	Aspergillus_welwitschiae__gene5901
Aspergillus_welwitschiae__gene6033	1	12106	hr_pks	100	BGC0001892__ATZ45182.1	2.15e-282	50.2	hr_pks	sp|B1GVX7|BOA6_BOTFB	0	46.2	sp|B1GVX7|BOA6_BOTFB Reducing polyketide synthase BOA6 OS=Botryotinia fuckeliana (strain B05.10) OX=332648 GN=BOA6 PE=2 SV=1	Aspergillus_welwitschiae__gene6033
Aspergillus_welwitschiae__gene6145	1	7873	hr_pks	100	BGC0002525__BBU37368.1	6.36e-123	39.9	hr_pks	sp|S3D9F1|GLOL_GLAL2	0	35.9	sp|S3D9F1|GLOL_GLAL2 Highly reducing polyketide synthase gloL OS=Glarea lozoyensis (strain ATCC 20868 / MF5171) OX=1116229 GN=gloL PE=1 SV=1	Aspergillus_welwitschiae__gene6145
Aspergillus_welwitschiae__gene6917	1	8269	hr_pks	100	BGC0001358__OAQ83765.1	1.64e-127	56.5	hr_pks	sp|A0A6S5ZY48|G433_FUSSX	2.35e-246	30.5	sp|A0A6S5ZY48|G433_FUSSX Highly reducing polyketide synthase g433 OS=Fusarium sp. OX=29916 GN=g433 PE=2 SV=1	Aspergillus_welwitschiae__gene6917
Aspergillus_welwitschiae__gene7209	1	7004	OTHER	100	sp|A2QUI2|ALBA_ASPNC	0	99.8	OTHER	sp|G3XLL5|ALBA_ASPNA	0	91	sp|G3XLL5|ALBA_ASPNA Non-reducing polyketide synthase albA OS=Aspergillus niger (strain ATCC 1015 / CBS 113.46 / FGSC A1144 / LSHB Ac4 / NCTC 3858a / NRRL 328 / USDA 3528.7) OX=380704 GN=albA PE=3 SV=1	Aspergillus_welwitschiae__gene7209
Aspergillus_welwitschiae__gene7241	1	8247	hr_pks	100	BGC0001358__OAQ83765.1	2.29e-73	53.8	hr_pks	sp|S3D9F1|GLOL_GLAL2	5.06e-144	33.9	sp|S3D9F1|GLOL_GLAL2 Highly reducing polyketide synthase gloL OS=Glarea lozoyensis (strain ATCC 20868 / MF5171) OX=1116229 GN=gloL PE=1 SV=1	Aspergillus_welwitschiae__gene7241
Aspergillus_welwitschiae__gene731	1	7452	hr_pks	100	sp|P9WEQ0|OLCA_PENCN	0	57.5	hr_pks	sp|A0A1V6NYI6|VERA_PENPO	0	46.5	sp|A0A1V6NYI6|VERA_PENPO Highly reducing polyketide synthase verA OS=Penicillium polonicum OX=60169 GN=verA PE=3 SV=1	Aspergillus_welwitschiae__gene731
Aspergillus_welwitschiae__gene7471	1	8341	hr_pks	100	BGC0002525__BBU37368.1	6.32e-98	36.6	hr_pks	sp|A0A6S5ZY48|G433_FUSSX	1.3e-138	26.9	sp|A0A6S5ZY48|G433_FUSSX Highly reducing polyketide synthase g433 OS=Fusarium sp. OX=29916 GN=g433 PE=2 SV=1	Aspergillus_welwitschiae__gene7471
Aspergillus_welwitschiae__gene7518	1	7915	OTHER	100	BGC0001143__EHA28237.1	0	98.5	OTHER	sp|A2QTE9|EPAA_ASPNC	0	97	sp|A2QTE9|EPAA_ASPNC Non-reducing polyketide synthase epaA OS=Aspergillus niger (strain CBS 513.88 / FGSC A1513) OX=425011 GN=epaA PE=3 SV=1	Aspergillus_welwitschiae__gene7518
Aspergillus_welwitschiae__gene7525	1	8247	hr_pks	100	BGC0001143__EHA28244.1	0	67.7	hr_pks	sp|G3XMD1|AZAB_ASPNA	0	60.6	sp|G3XMD1|AZAB_ASPNA Highly reducing polyketide synthase azaB OS=Aspergillus niger (strain ATCC 1015 / CBS 113.46 / FGSC A1144 / LSHB Ac4 / NCTC 3858a / NRRL 328 / USDA 3528.7) OX=380704 GN=azaB PE=1 SV=1	Aspergillus_welwitschiae__gene7525
Aspergillus_welwitschiae__gene7721	1	6891	hr_pks	100	aspergillus_brasiliensis_cbs_101740_gca_001889945__gene___ASPBRDRAFT_199676	5.12e-99	38.9	hr_pks	sp|Q0CF75|AZPB1_ASPTN	6.03e-154	25.8	sp|Q0CF75|AZPB1_ASPTN Highly reducing polyketide synthase ATEG_07659 OS=Aspergillus terreus (strain NIH 2624 / FGSC A1156) OX=341663 GN=ATEG_07659 PE=1 SV=1	Aspergillus_welwitschiae__gene7721
Aspergillus_welwitschiae__gene8602	1	7723	hr_pks	100	BGC0000129__EAL89230.2	0	56.9	hr_pks	sp|A0A1V6NYI6|VERA_PENPO	0	45.2	sp|A0A1V6NYI6|VERA_PENPO Highly reducing polyketide synthase verA OS=Penicillium polonicum OX=60169 GN=verA PE=3 SV=1	Aspergillus_welwitschiae__gene8602
Aspergillus_welwitschiae__gene8845	1	8161	hr_pks	100	BGC0002606__AUS29490.1	0	91.6	hr_pks	sp|A2R6H1|OTAA_ASPNC	0	50.7	sp|A2R6H1|OTAA_ASPNC Highly reducing polyketide synthase otaA OS=Aspergillus niger (strain CBS 513.88 / FGSC A1513) OX=425011 GN=otaA PE=2 SV=2	Aspergillus_welwitschiae__gene8845
Aspergillus_welwitschiae__gene8988	1	4881	hr_pks	100	BGC0002525__BBU37368.1	9.12e-148	34.5	hr_pks	sp|A0A6S5ZY48|G433_FUSSX	1.78e-221	35.9	sp|A0A6S5ZY48|G433_FUSSX Highly reducing polyketide synthase g433 OS=Fusarium sp. OX=29916 GN=g433 PE=2 SV=1	Aspergillus_welwitschiae__gene8988
Aspergillus_welwitschiae__gene9156	1	6194	OUTLIER	*	None	None	None	None	sp|Q2TXG3|ORYB_ASPOR	0	46.3	sp|Q2TXG3|ORYB_ASPOR Fatty acid synthase subunit beta OS=Aspergillus oryzae (strain ATCC 42149 / RIB 40) OX=510516 GN=oryfasB PE=3 SV=1	Aspergillus_welwitschiae__gene9156
Aspergillus_welwitschiae__gene9584	1	6814	hr_pks	100	cadophora_sp_dse1049_gca_003073865__gene___DL98DRAFT_485729	1.03e-216	51.5	hr_pks	sp|N4WHE3|PKS1_COCH4	2.97e-295	31.8	sp|N4WHE3|PKS1_COCH4 Reducing polyketide synthase PKS1 OS=Cochliobolus heterostrophus (strain C4 / ATCC 48331 / race T) OX=665024 GN=PKS1 PE=3 SV=1	Aspergillus_welwitschiae__gene9584
Aspergillus_welwitschiae__gene9932	1	2190	OTHER	100	BGC0001244__AIW00670.1	5.76e-13	37.1	OTHER	sp|Q8L3X9|KASM_ARATH	3.7e-39	34.2	sp|Q8L3X9|KASM_ARATH 3-oxoacyl-[acyl-carrier-protein] synthase, mitochondrial OS=Arabidopsis thaliana OX=3702 GN=KAS PE=1 SV=1	Aspergillus_welwitschiae__gene9932
Auricularia_subglabra__gene12258	1	8132	OTHER	100	BGC0002213__EIN09536.1	1.46e-125	34.2	OTHER	sp|A0A384XH94|SPKS1_STRTC	2.36e-114	38.8	sp|A0A384XH94|SPKS1_STRTC Highly reducing polyketide synthase stpks1 OS=Strobilurus tenacellus OX=41251 GN=stpks1 PE=1 SV=1	Auricularia_subglabra__gene12258
Auricularia_subglabra__gene6770	1	12885	OUTLIER	*	None	None	None	None	sp|Q10289|FAS2_SCHPO	1.65e-259	43.2	sp|Q10289|FAS2_SCHPO Fatty acid synthase subunit alpha OS=Schizosaccharomyces pombe (strain 972 / ATCC 24843) OX=284812 GN=fas2 PE=1 SV=2	Auricularia_subglabra__gene6770
Batrachochytrium_dendrobatidis__gene2765	1	1558	OUTLIER	*	None	None	None	None	None	None	None	None	Batrachochytrium_dendrobatidis__gene2765
Batrachochytrium_dendrobatidis__gene476	1	1603	OTHER	100	BGC0002537__BCD52390.1	2.73e-28	32.3	OTHER	sp|Q8L3X9|KASM_ARATH	2.01e-109	62.1	sp|Q8L3X9|KASM_ARATH 3-oxoacyl-[acyl-carrier-protein] synthase, mitochondrial OS=Arabidopsis thaliana OX=3702 GN=KAS PE=1 SV=1	Batrachochytrium_dendrobatidis__gene476
Beauveria_bassiana__gene1009	1	7240	hr_pks	100	tolypocladium_capitatum_gca_002901185__gene___TCAP_03221	0	65.3	hr_pks	sp|N4WHE3|PKS1_COCH4	3.42e-255	38.9	sp|N4WHE3|PKS1_COCH4 Reducing polyketide synthase PKS1 OS=Cochliobolus heterostrophus (strain C4 / ATCC 48331 / race T) OX=665024 GN=PKS1 PE=3 SV=1	Beauveria_bassiana__gene1009
Beauveria_bassiana__gene10301	1	8111	hr_pks	100	sp|P9WET4|PREU5_PREIS	9.08e-194	39.4	hr_pks	sp|E5AE40|PKS2_LEPMJ	0	40.8	sp|E5AE40|PKS2_LEPMJ Highly reducing polyketide synthase PKS2 OS=Leptosphaeria maculans (strain JN3 / isolate v23.1.3 / race Av1-4-5-6-7-8) OX=985895 GN=PKS2 PE=2 SV=1	Beauveria_bassiana__gene10301
Beauveria_bassiana__gene1840	1	8528	hr_pks	100	BGC0002525__BBU37368.1	8.74e-114	43.9	hr_pks	sp|A0A6S5ZY48|G433_FUSSX	1.44e-274	29.5	sp|A0A6S5ZY48|G433_FUSSX Highly reducing polyketide synthase g433 OS=Fusarium sp. OX=29916 GN=g433 PE=2 SV=1	Beauveria_bassiana__gene1840
Beauveria_bassiana__gene3615	1	7544	hr_pks	100	sp|P0DUK1|PSPA_PENSO	8.94e-191	48.1	hr_pks	sp|A0A6S5ZY48|G433_FUSSX	0	35.6	sp|A0A6S5ZY48|G433_FUSSX Highly reducing polyketide synthase g433 OS=Fusarium sp. OX=29916 GN=g433 PE=2 SV=1	Beauveria_bassiana__gene3615
Beauveria_bassiana__gene3809	1	7727	hr_pks	100	BGC0001141__AIA58899.1	2.06e-243	49.6	hr_pks	sp|A0A068ABB7|BREF7_EUPBR	0	43.2	sp|A0A068ABB7|BREF7_EUPBR Highly reducing polyketide synthase OS=Eupenicillium brefeldianum OX=1131482 GN=Bref-PKS PE=1 SV=1	Beauveria_bassiana__gene3809
Beauveria_bassiana__gene4326	1	5883	OTHER	100	sp|P9WQE0|PPSE_MYCTO	2.59e-65	35.9	OTHER	sp|G4N137|TAS1_MAGO7	8.76e-239	37.5	sp|G4N137|TAS1_MAGO7 Hybrid PKS-NRPS synthetase TAS1 OS=Magnaporthe oryzae (strain 70-15 / ATCC MYA-4617 / FGSC 8958) OX=242507 GN=TAS1 PE=1 SV=1	Beauveria_bassiana__gene4326
Beauveria_bassiana__gene4373	1	8605	hr_pks	100	sp|P0DUK1|PSPA_PENSO	1.59e-161	37.1	hr_pks	sp|P0DUK1|PSPA_PENSO	0	39.2	sp|P0DUK1|PSPA_PENSO Highly reducing polyketide synthase pspA OS=Penicillium soppii OX=69789 GN=pspA PE=3 SV=1	Beauveria_bassiana__gene4373
Beauveria_bassiana__gene4734	1	1161	OUTLIER	*	None	None	None	None	sp|P71019|FABD_BACSU	2.36e-30	32.3	sp|P71019|FABD_BACSU Malonyl CoA-acyl carrier protein transacylase OS=Bacillus subtilis (strain 168) OX=224308 GN=fabD PE=3 SV=2	Beauveria_bassiana__gene4734
Beauveria_bassiana__gene5175	1	11838	hr_pks	99.4	BGC0001857__QBE85649.1	0	59.4	hr_pks	sp|A0A411L027|BUAA_ASPBU	0	40.8	sp|A0A411L027|BUAA_ASPBU Hybrid PKS-NRPS synthetase buaA OS=Aspergillus burnettii OX=2508778 GN=buaA PE=3 SV=1	Beauveria_bassiana__gene5175
Beauveria_bassiana__gene5940	1	1345	OTHER	100	BGC0001244__AIW00670.1	2.39e-28	30.1	OTHER	sp|Q8L3X9|KASM_ARATH	1.81e-113	59.9	sp|Q8L3X9|KASM_ARATH 3-oxoacyl-[acyl-carrier-protein] synthase, mitochondrial OS=Arabidopsis thaliana OX=3702 GN=KAS PE=1 SV=1	Beauveria_bassiana__gene5940
Beauveria_bassiana__gene6612	1	6795	OTHER	100	BGC0002215__ERF77221.1	1.59e-300	61.5	OTHER	sp|A0A142C799|PHNA_PENHR	0	40.8	sp|A0A142C799|PHNA_PENHR Non-reducing polyketide synthase phnA OS=Penicillium herquei OX=69774 GN=phnA PE=1 SV=1	Beauveria_bassiana__gene6612
Beauveria_bassiana__gene6885	1	6312	OUTLIER	*	None	None	None	None	sp|P34229|FAS1_YARLI	0	59.8	sp|P34229|FAS1_YARLI Fatty acid synthase subunit beta OS=Yarrowia lipolytica (strain CLIB 122 / E 150) OX=284591 GN=FAS1 PE=3 SV=2	Beauveria_bassiana__gene6885
Beauveria_bassiana__gene7337	1	12928	hr_pks	100	sp|J4KMC1|TENS_BEAB2	0	95.6	hr_pks	sp|J4KMC1|TENS_BEAB2	0	100	sp|J4KMC1|TENS_BEAB2 Tenellin synthetase OS=Beauveria bassiana (strain ARSEF 2860) OX=655819 GN=tenS PE=1 SV=1	Beauveria_bassiana__gene7337
Beauveria_bassiana__gene7419	1	7150	hr_pks	100	sp|A0A0N0DCA3|DEP5_FUSLA	1.55e-119	56	hr_pks	sp|D2E9X0|DEP5_ALTBR	9.01e-203	30.7	sp|D2E9X0|DEP5_ALTBR Reducing polyketide synthase DEP5 OS=Alternaria brassicicola OX=29001 GN=DEP5 PE=2 SV=1	Beauveria_bassiana__gene7419
Beauveria_bassiana__gene8178	1	7254	OTHER	100	BGC0001720__EJP62792.1	5.21e-269	51.7	OTHER	sp|J4UHQ6|OPS1_BEAB2	0	77.6	sp|J4UHQ6|OPS1_BEAB2 Orsellinic acid synthase OS=Beauveria bassiana (strain ARSEF 2860) OX=655819 GN=OpS1 PE=1 SV=1	Beauveria_bassiana__gene8178
Beauveria_bassiana__gene8218	1	8007	hr_pks	100	BGC0002203__EJP62832.1	5.09e-283	100	hr_pks	sp|G3J453|CM3B_CORMM	0	83.7	sp|G3J453|CM3B_CORMM Highly reducing polyketide synthase cm3B OS=Cordyceps militaris (strain CM01) OX=983644 GN=cm3B PE=1 SV=1	Beauveria_bassiana__gene8218
Beauveria_bassiana__gene966	1	7194	hr_pks	100	sp|G3JUI8|MILA_CORMM	0	79.6	hr_pks	sp|A0A411L027|BUAA_ASPBU	0	38.4	sp|A0A411L027|BUAA_ASPBU Hybrid PKS-NRPS synthetase buaA OS=Aspergillus burnettii OX=2508778 GN=buaA PE=3 SV=1	Beauveria_bassiana__gene966
Beauveria_bassiana__gene9744	1	7648	hr_pks	100	trichoderma_longibrachiatum_atcc_18648_gca_003025155__gene___M440DRAFT_1102985	8.78e-233	43.3	hr_pks	sp|N4WHE3|PKS1_COCH4	1.94e-188	28.7	sp|N4WHE3|PKS1_COCH4 Reducing polyketide synthase PKS1 OS=Cochliobolus heterostrophus (strain C4 / ATCC 48331 / race T) OX=665024 GN=PKS1 PE=3 SV=1	Beauveria_bassiana__gene9744
Beauveria_bassiana__gene9824	1	2643	OTHER	100	BGC0001583__DAB41653.1	2.63e-52	78.8	OTHER	sp|M3A326|PKS81_PSEFD	1.59e-150	52.4	sp|M3A326|PKS81_PSEFD Non-reducing polyketide synthase PKS8-1 OS=Pseudocercospora fijiensis (strain CIRAD86) OX=383855 GN=PKS8-1 PE=2 SV=1	Beauveria_bassiana__gene9824
Beauveria_bassiana__gene9855	1	12282	hr_pks	100	BGC0002204__QOG08944.1	3.84e-296	54.5	hr_pks	sp|A0A6J4B487|LUC5_FUSSX	0	37.4	sp|A0A6J4B487|LUC5_FUSSX Hybrid PKS-NRPS synthetase LUC5 OS=Fusarium sp. OX=29916 GN=LUC5 PE=3 SV=1	Beauveria_bassiana__gene9855
Botryotinia_calthae__gene-BOTCAL_0019g00080	1	7911	OTHER	100	BGC0002483__AUW31052.1	5.18e-263	48.2	OTHER	sp|Q5AZ32|PKBA_EMENI	0	37.7	sp|Q5AZ32|PKBA_EMENI Non-reducing polyketide synthase pkbA OS=Emericella nidulans (strain FGSC A4 / ATCC 38163 / CBS 112.46 / NRRL 194 / M139) OX=227321 GN=pkbA PE=1 SV=1	Botryotinia_calthae__gene-BOTCAL_0019g00080
Botryotinia_calthae__gene-BOTCAL_0019g00140	1	6762	OTHER	100	BGC0001258__AAN59953.1	0	72.6	OTHER	sp|W3X7U2|PFMAE_PESFW	0	61.9	sp|W3X7U2|PFMAE_PESFW Conidial pigment polyketide synthase PfmaE OS=Pestalotiopsis fici (strain W106-1 / CGMCC3.15140) OX=1229662 GN=PfmaE PE=2 SV=1	Botryotinia_calthae__gene-BOTCAL_0019g00140
Botryotinia_calthae__gene-BOTCAL_0040g00130	1	9654	hr_pks	100	BGC0001373__BAV32159.1	3.6e-161	35.5	hr_pks	sp|A0A084API3|SAT13_STACB	1.63e-313	32.1	sp|A0A084API3|SAT13_STACB Highly reducing polyketide synthase SAT13 OS=Stachybotrys chartarum (strain CBS 109288 / IBT 7711) OX=1280523 GN=SAT13 PE=3 SV=1	Botryotinia_calthae__gene-BOTCAL_0040g00130
Botryotinia_calthae__gene-BOTCAL_0048g00120	1	7938	hr_pks	100	aspergillus_calidoustus_gca_001511075__gene___ASPCAL07647	1.81e-201	53.8	hr_pks	sp|C8VJR7|ALNA_EMENI	1.02e-166	47.8	sp|C8VJR7|ALNA_EMENI Highly reducing polyketide synthase alnA OS=Emericella nidulans (strain FGSC A4 / ATCC 38163 / CBS 112.46 / NRRL 194 / M139) OX=227321 GN=alnA PE=1 SV=1	Botryotinia_calthae__gene-BOTCAL_0048g00120
Botryotinia_calthae__gene-BOTCAL_0051g00200	1	7224	hr_pks	100	Coleophoma_cylindrospora__gene1252	1.61e-170	75	hr_pks	sp|N4WHE3|PKS1_COCH4	8.57e-143	38.5	sp|N4WHE3|PKS1_COCH4 Reducing polyketide synthase PKS1 OS=Cochliobolus heterostrophus (strain C4 / ATCC 48331 / race T) OX=665024 GN=PKS1 PE=3 SV=1	Botryotinia_calthae__gene-BOTCAL_0051g00200
Botryotinia_calthae__gene-BOTCAL_0067g00310	1	6353	OUTLIER	*	None	None	None	None	sp|P34229|FAS1_YARLI	0	59	sp|P34229|FAS1_YARLI Fatty acid synthase subunit beta OS=Yarrowia lipolytica (strain CLIB 122 / E 150) OX=284591 GN=FAS1 PE=3 SV=2	Botryotinia_calthae__gene-BOTCAL_0067g00310
Botryotinia_calthae__gene-BOTCAL_0068g00080	1	5497	OTHER	100	BGC0001284__AKN45693.1	0	71.3	OTHER	sp|A0A0H4ADX3|PKS19_PHANO	0	66.2	sp|A0A0H4ADX3|PKS19_PHANO Non-reducing polyketide synthase PKS19 OS=Phaeosphaeria nodorum (strain SN15 / ATCC MYA-4574 / FGSC 10173) OX=321614 PE=2 SV=1	Botryotinia_calthae__gene-BOTCAL_0068g00080
Botryotinia_calthae__gene-BOTCAL_0090g00040	1	7662	hr_pks	100	BGC0001141__AIA58899.1	7.37e-140	51.6	hr_pks	sp|A0A068ABB7|BREF7_EUPBR	0	42.2	sp|A0A068ABB7|BREF7_EUPBR Highly reducing polyketide synthase OS=Eupenicillium brefeldianum OX=1131482 GN=Bref-PKS PE=1 SV=1	Botryotinia_calthae__gene-BOTCAL_0090g00040
Botryotinia_calthae__gene-BOTCAL_0095g00030	1	6874	hr_pks	100	BGC0002227__GAA85575.1	7.13e-151	55.8	hr_pks	sp|A0A068ABB7|BREF7_EUPBR	2.95e-158	25.7	sp|A0A068ABB7|BREF7_EUPBR Highly reducing polyketide synthase OS=Eupenicillium brefeldianum OX=1131482 GN=Bref-PKS PE=1 SV=1	Botryotinia_calthae__gene-BOTCAL_0095g00030
Botryotinia_calthae__gene-BOTCAL_0117g00140	1	7398	hr_pks	100	BGC0001892__ATZ45185.1	0	66.3	hr_pks	sp|G0LET7|BOA9_BOTFB	0	72	sp|G0LET7|BOA9_BOTFB Reducing polyketide synthase BOA9 OS=Botryotinia fuckeliana (strain B05.10) OX=332648 GN=BOA9 PE=2 SV=1	Botryotinia_calthae__gene-BOTCAL_0117g00140
Botryotinia_calthae__gene-BOTCAL_0117g00180	1	7566	hr_pks	100	BGC0001892__ATZ45182.1	0	90.8	hr_pks	sp|B1GVX7|BOA6_BOTFB	0	90.9	sp|B1GVX7|BOA6_BOTFB Reducing polyketide synthase BOA6 OS=Botryotinia fuckeliana (strain B05.10) OX=332648 GN=BOA6 PE=2 SV=1	Botryotinia_calthae__gene-BOTCAL_0117g00180
Botryotinia_calthae__gene-BOTCAL_0121g00010	1	1343	OTHER	100	BGC0002212__ESK96613.1	1.56e-12	24.2	OTHER	sp|P71019|FABD_BACSU	1.4e-37	35.6	sp|P71019|FABD_BACSU Malonyl CoA-acyl carrier protein transacylase OS=Bacillus subtilis (strain 168) OX=224308 GN=fabD PE=3 SV=2	Botryotinia_calthae__gene-BOTCAL_0121g00010
Botryotinia_calthae__gene-BOTCAL_0125g00170	1	7480	hr_pks	100	BGC0001724__EPS29069.1	1.54e-272	51	hr_pks	sp|A1CLY8|CCSA_ASPCL	0	38.8	sp|A1CLY8|CCSA_ASPCL Polyketide synthase-nonribosomal peptide synthetase OS=Aspergillus clavatus (strain ATCC 1007 / CBS 513.65 / DSM 816 / NCTC 3887 / NRRL 1 / QM 1276 / 107) OX=344612 GN=ccsA PE=3 SV=1	Botryotinia_calthae__gene-BOTCAL_0125g00170
Botryotinia_calthae__gene-BOTCAL_0139g00080	1	13079	hr_pks	100	BGC0002235__EHA55875.1	1.18e-166	62.1	hr_pks	sp|A0A411L027|BUAA_ASPBU	0	28.9	sp|A0A411L027|BUAA_ASPBU Hybrid PKS-NRPS synthetase buaA OS=Aspergillus burnettii OX=2508778 GN=buaA PE=3 SV=1	Botryotinia_calthae__gene-BOTCAL_0139g00080
Botryotinia_calthae__gene-BOTCAL_0172g00090	1	6542	OTHER	100	sp|P9WET3|PREU8_PREIS	0	60.1	OTHER	sp|A7UMW1|PKS1_ELSFA	0	47	sp|A7UMW1|PKS1_ELSFA Non-reducing polyketide synthase 1 OS=Elsinoe fawcettii OX=40997 GN=PKS1 PE=2 SV=1	Botryotinia_calthae__gene-BOTCAL_0172g00090
Botryotinia_calthae__gene-BOTCAL_0225g00020	1	2293	hr_pks	100	Scytalidium_lignicola__gene7897	4.94e-21	44	hr_pks	sp|Q50LG3|AFT91_ALTAL	2.93e-15	43.1	sp|Q50LG3|AFT91_ALTAL Highly reducing polyketide synthase AFT9-1 OS=Alternaria alternata OX=5599 GN=AFT9-1 PE=3 SV=1	Botryotinia_calthae__gene-BOTCAL_0225g00020
Botryotinia_calthae__gene-BOTCAL_0394g00080	1	8551	OTHER	100	BGC0002483__AUW31052.1	1.25e-132	35.5	OTHER	sp|Q0CRQ5|5MOAS_ASPTN	1.02e-154	30.7	sp|Q0CRQ5|5MOAS_ASPTN 5-methylorsellinic acid synthase OS=Aspergillus terreus (strain NIH 2624 / FGSC A1156) OX=341663 GN=ATEG_03629 PE=1 SV=1	Botryotinia_calthae__gene-BOTCAL_0394g00080
Botryotinia_calthae__gene-BOTCAL_0448g00110	1	8484	hr_pks	100	aspergillus_calidoustus_gca_001511075__gene___ASPCAL07647	1.97e-116	34.7	hr_pks	sp|G4NEB1|NEC1_MAGO7	1.33e-264	27	sp|G4NEB1|NEC1_MAGO7 Highly reducing polyketide synthase NEC1 OS=Magnaporthe oryzae (strain 70-15 / ATCC MYA-4617 / FGSC 8958) OX=242507 GN=NEC1 PE=1 SV=1	Botryotinia_calthae__gene-BOTCAL_0448g00110
Botryotinia_calthae__gene-BOTCAL_0462g00010	1	7970	OTHER	100	sp|A0A8F4SKJ7|ATR1_STEAL	0	59	OTHER	sp|A0A455R5P9|ASCC_ACREG	0	46.2	sp|A0A455R5P9|ASCC_ACREG Non-reducing polyketide synthase ascC OS=Acremonium egyptiacum OX=749675 GN=ascC PE=1 SV=1	Botryotinia_calthae__gene-BOTCAL_0462g00010
Botryotinia_calthae__gene-BOTCAL_0572g00050	1	12602	hr_pks	100	sp|Q2HBN0|CGHG_CHAGB	4.61e-229	44.6	hr_pks	sp|A0A0F7GFS4|TASS_HAPIR	0	46.8	sp|A0A0F7GFS4|TASS_HAPIR Hybrid PKS-NRPS synthetase tasS OS=Hapsidospora irregularis OX=95324 GN=tasS PE=1 SV=1	Botryotinia_calthae__gene-BOTCAL_0572g00050
Botryotinia_calthae__gene-BOTCAL_0716g00010	1	6557	OTHER	100	BGC0002596__CCE33500.1	4.79e-263	49.8	OTHER	sp|Q5AUX1|ORSA_EMENI	0	45.6	sp|Q5AUX1|ORSA_EMENI Orsellinic acid synthase OS=Emericella nidulans (strain FGSC A4 / ATCC 38163 / CBS 112.46 / NRRL 194 / M139) OX=227321 GN=orsA PE=1 SV=1	Botryotinia_calthae__gene-BOTCAL_0716g00010
Botryotinia_calthae__gene-BOTCAL_1088g00020	1	1390	OTHER	100	BGC0001244__AIW00670.1	4.24e-25	33.3	OTHER	sp|Q8L3X9|KASM_ARATH	1.88e-114	57.5	sp|Q8L3X9|KASM_ARATH 3-oxoacyl-[acyl-carrier-protein] synthase, mitochondrial OS=Arabidopsis thaliana OX=3702 GN=KAS PE=1 SV=1	Botryotinia_calthae__gene-BOTCAL_1088g00020
Botryotinia_calthae__gene-BOTCAL_1100g00010	1	2544	hr_pks	100	BGC0002240__KFG78606.1	0	71.9	hr_pks	sp|P0DUT7|BA17A_METAN	0	71.8	sp|P0DUT7|BA17A_METAN Highly reducing polyketide synthase 17 OS=Metarhizium anisopliae OX=5530 GN=Ba17a PE=1 SV=1	Botryotinia_calthae__gene-BOTCAL_1100g00010
Botryotinia_convoluta__gene-BCON_0003g00260	1	8194	hr_pks	100	aspergillus_tubingensis_cbs_134_48_gca_001890745__gene___ASPTUDRAFT_927185	4.74e-136	34.6	hr_pks	sp|G4NEB1|NEC1_MAGO7	7.57e-226	30.1	sp|G4NEB1|NEC1_MAGO7 Highly reducing polyketide synthase NEC1 OS=Magnaporthe oryzae (strain 70-15 / ATCC MYA-4617 / FGSC 8958) OX=242507 GN=NEC1 PE=1 SV=1	Botryotinia_convoluta__gene-BCON_0003g00260
Botryotinia_convoluta__gene-BCON_0003g00930	1	4391	hr_pks	99.8	aspergillus_piperis_cbs_112811_gca_003184755__gene___BO85DRAFT_363683	1.89e-55	44.3	hr_pks	sp|G4NEB1|NEC1_MAGO7	1.59e-71	29.3	sp|G4NEB1|NEC1_MAGO7 Highly reducing polyketide synthase NEC1 OS=Magnaporthe oryzae (strain 70-15 / ATCC MYA-4617 / FGSC 8958) OX=242507 GN=NEC1 PE=1 SV=1	Botryotinia_convoluta__gene-BCON_0003g00930
Botryotinia_convoluta__gene-BCON_0015g00090	1	8243	hr_pks	100	talaromyces_islandicus_gca_000985935__gene___PISL3812_01117	7.23e-75	29.2	hr_pks	sp|G3XMD1|AZAB_ASPNA	5.68e-262	27.2	sp|G3XMD1|AZAB_ASPNA Highly reducing polyketide synthase azaB OS=Aspergillus niger (strain ATCC 1015 / CBS 113.46 / FGSC A1144 / LSHB Ac4 / NCTC 3858a / NRRL 328 / USDA 3528.7) OX=380704 GN=azaB PE=1 SV=1	Botryotinia_convoluta__gene-BCON_0015g00090
Botryotinia_convoluta__gene-BCON_0023g00270	1	6354	OUTLIER	*	None	None	None	None	sp|P34229|FAS1_YARLI	0	59.9	sp|P34229|FAS1_YARLI Fatty acid synthase subunit beta OS=Yarrowia lipolytica (strain CLIB 122 / E 150) OX=284591 GN=FAS1 PE=3 SV=2	Botryotinia_convoluta__gene-BCON_0023g00270
Botryotinia_convoluta__gene-BCON_0037g00130	1	6760	OTHER	100	BGC0001258__AAN59953.1	4.66e-278	69.9	OTHER	sp|W3X7U2|PFMAE_PESFW	4.89e-305	41.7	sp|W3X7U2|PFMAE_PESFW Conidial pigment polyketide synthase PfmaE OS=Pestalotiopsis fici (strain W106-1 / CGMCC3.15140) OX=1229662 GN=PfmaE PE=2 SV=1	Botryotinia_convoluta__gene-BCON_0037g00130
Botryotinia_convoluta__gene-BCON_0037g00210	1	7911	OTHER	100	BGC0002483__AUW31052.1	1.33e-133	43.6	OTHER	sp|Q5AZ32|PKBA_EMENI	0	31.2	sp|Q5AZ32|PKBA_EMENI Non-reducing polyketide synthase pkbA OS=Emericella nidulans (strain FGSC A4 / ATCC 38163 / CBS 112.46 / NRRL 194 / M139) OX=227321 GN=pkbA PE=1 SV=1	Botryotinia_convoluta__gene-BCON_0037g00210
Botryotinia_convoluta__gene-BCON_0043g00160	1	8652	hr_pks	100	aspergillus_calidoustus_gca_001511075__gene___ASPCAL07647	1.21e-104	52.1	hr_pks	sp|G3XMD1|AZAB_ASPNA	4.53e-97	22.5	sp|G3XMD1|AZAB_ASPNA Highly reducing polyketide synthase azaB OS=Aspergillus niger (strain ATCC 1015 / CBS 113.46 / FGSC A1144 / LSHB Ac4 / NCTC 3858a / NRRL 328 / USDA 3528.7) OX=380704 GN=azaB PE=1 SV=1	Botryotinia_convoluta__gene-BCON_0043g00160
Botryotinia_convoluta__gene-BCON_0061g00040	1	3310	OTHER	100	BGC0002483__AUW31052.1	5.17e-55	50.8	OTHER	sp|A0A2P1DP91|MACA_PENTR	1.69e-58	31.9	sp|A0A2P1DP91|MACA_PENTR 6-methylsalicylic acid synthase OS=Penicillium terrestre OX=374132 GN=macA PE=1 SV=1	Botryotinia_convoluta__gene-BCON_0061g00040
Botryotinia_convoluta__gene-BCON_0082g00310	1	7222	hr_pks	100	Coleophoma_cylindrospora__gene1252	5.01e-236	52.8	hr_pks	sp|L7X8J4|CURS1_ASPTE	9.25e-178	28.2	sp|L7X8J4|CURS1_ASPTE Highly reducing polyketide synthase curS1 OS=Aspergillus terreus OX=33178 GN=curS1 PE=1 SV=1	Botryotinia_convoluta__gene-BCON_0082g00310
Botryotinia_convoluta__gene-BCON_0100g00170	1	7481	hr_pks	100	BGC0001724__EPS29069.1	4.83e-277	51.3	hr_pks	sp|A0A7L8UVC9|FFSA_ASPFV	0	38.5	sp|A0A7L8UVC9|FFSA_ASPFV Polyketide synthase-nonribosomal peptide synthetase ffsA OS=Aspergillus flavipes OX=41900 GN=ffsA PE=3 SV=1	Botryotinia_convoluta__gene-BCON_0100g00170
Botryotinia_convoluta__gene-BCON_0112g00200	1	8193	hr_pks	100	aspergillus_calidoustus_gca_001511075__gene___ASPCAL07647	3.9e-94	52.5	hr_pks	sp|A0A3G1DJH7|SQTKS_PHOSM	4.71e-288	32.3	sp|A0A3G1DJH7|SQTKS_PHOSM Squalestatin tetraketide synthase OS=Phoma sp. (strain ATCC 20986 / MF5453) OX=1828523 GN=pks1 PE=1 SV=1	Botryotinia_convoluta__gene-BCON_0112g00200
Botryotinia_convoluta__gene-BCON_0130g00310	1	864	hr_pks	99.3	sp|P0CU84|APMLA_ARTPE	4.79e-36	49	hr_pks	sp|A0A068ABB7|BREF7_EUPBR	7.62e-71	48.8	sp|A0A068ABB7|BREF7_EUPBR Highly reducing polyketide synthase OS=Eupenicillium brefeldianum OX=1131482 GN=Bref-PKS PE=1 SV=1	Botryotinia_convoluta__gene-BCON_0130g00310
Botryotinia_convoluta__gene-BCON_0138g00050	1	8741	hr_pks	100	BGC0002515__KAF9708863.1	3.24e-102	32.4	hr_pks	sp|D7UQ44|SOL1_ALTSO	1.95e-163	24.5	sp|D7UQ44|SOL1_ALTSO Prosolanapyrone synthase OS=Alternaria solani OX=48100 GN=sol1 PE=1 SV=1	Botryotinia_convoluta__gene-BCON_0138g00050
Botryotinia_convoluta__gene-BCON_0194g00100	1	6548	OTHER	100	sp|P9WET3|PREU8_PREIS	0	60.1	OTHER	sp|A7UMW1|PKS1_ELSFA	0	46.6	sp|A7UMW1|PKS1_ELSFA Non-reducing polyketide synthase 1 OS=Elsinoe fawcettii OX=40997 GN=PKS1 PE=2 SV=1	Botryotinia_convoluta__gene-BCON_0194g00100
Botryotinia_convoluta__gene-BCON_0204g00150	1	5497	OTHER	100	BGC0001284__AKN45693.1	0	71.7	OTHER	sp|A0A0H4ADX3|PKS19_PHANO	0	66.5	sp|A0A0H4ADX3|PKS19_PHANO Non-reducing polyketide synthase PKS19 OS=Phaeosphaeria nodorum (strain SN15 / ATCC MYA-4574 / FGSC 10173) OX=321614 PE=2 SV=1	Botryotinia_convoluta__gene-BCON_0204g00150
Botryotinia_convoluta__gene-BCON_0207g00010	1	1348	OTHER	100	BGC0002212__ESK96613.1	5.14e-13	24.2	OTHER	sp|P71019|FABD_BACSU	5.36e-39	36.3	sp|P71019|FABD_BACSU Malonyl CoA-acyl carrier protein transacylase OS=Bacillus subtilis (strain 168) OX=224308 GN=fabD PE=3 SV=2	Botryotinia_convoluta__gene-BCON_0207g00010
Botryotinia_convoluta__gene-BCON_0220g00130	1	1390	OTHER	100	BGC0001244__AIW00670.1	5.56e-26	32.9	OTHER	sp|Q8L3X9|KASM_ARATH	2.35e-115	58.2	sp|Q8L3X9|KASM_ARATH 3-oxoacyl-[acyl-carrier-protein] synthase, mitochondrial OS=Arabidopsis thaliana OX=3702 GN=KAS PE=1 SV=1	Botryotinia_convoluta__gene-BCON_0220g00130
Botryotinia_convoluta__gene-BCON_0238g00010	1	2422	hr_pks	100	talaromyces_islandicus_gca_000985935__gene___PISL3812_01117	3e-49	59.7	hr_pks	sp|G4NEB1|NEC1_MAGO7	2.71e-39	55.2	sp|G4NEB1|NEC1_MAGO7 Highly reducing polyketide synthase NEC1 OS=Magnaporthe oryzae (strain 70-15 / ATCC MYA-4617 / FGSC 8958) OX=242507 GN=NEC1 PE=1 SV=1	Botryotinia_convoluta__gene-BCON_0238g00010
Botryotinia_convoluta__gene-BCON_0267g00180	1	4952	hr_pks	100	aspergillus_brasiliensis_cbs_101740_gca_001889945__gene___ASPBRDRAFT_199676	3.35e-36	38.1	hr_pks	sp|B3FWU0|RDC5_METCM	1.44e-99	36.9	sp|B3FWU0|RDC5_METCM Reducing polyketide synthase rdc5 OS=Metacordyceps chlamydosporia OX=280754 GN=rdc5 PE=1 SV=1	Botryotinia_convoluta__gene-BCON_0267g00180
Botryotinia_convoluta__gene-BCON_0375g00040	1	7400	hr_pks	100	BGC0001892__ATZ45185.1	0	70.3	hr_pks	sp|G0LET7|BOA9_BOTFB	0	80.4	sp|G0LET7|BOA9_BOTFB Reducing polyketide synthase BOA9 OS=Botryotinia fuckeliana (strain B05.10) OX=332648 GN=BOA9 PE=2 SV=1	Botryotinia_convoluta__gene-BCON_0375g00040
Botryotinia_convoluta__gene-BCON_0375g00070	1	7569	hr_pks	100	BGC0001892__ATZ45182.1	0	93.8	hr_pks	sp|B1GVX7|BOA6_BOTFB	0	93.7	sp|B1GVX7|BOA6_BOTFB Reducing polyketide synthase BOA6 OS=Botryotinia fuckeliana (strain B05.10) OX=332648 GN=BOA6 PE=2 SV=1	Botryotinia_convoluta__gene-BCON_0375g00070
Botryotinia_convoluta__gene-BCON_0524g00010	1	231	hr_pks	98.1	Pyrenophora_seminiperda__gene-GMOD_00000948	1.43e-20	60.9	hr_pks	sp|Q2ABP6|PKSF_ALTSO	2.11e-14	54.2	sp|Q2ABP6|PKSF_ALTSO Reducing polyketide synthase pksF OS=Alternaria solani OX=48100 GN=pksF PE=1 SV=1	Botryotinia_convoluta__gene-BCON_0524g00010
Botryotinia_convoluta__gene-BCON_0532g00010	1	7972	hr_pks	100	aspergillus_calidoustus_gca_001511075__gene___ASPCAL07647	7.98e-105	38.2	hr_pks	sp|Q5KTM9|ALT5_ALTSO	1.26e-116	22.9	sp|Q5KTM9|ALT5_ALTSO Highly reducing polyketide synthase alt5 OS=Alternaria solani OX=48100 GN=alt5 PE=1 SV=1	Botryotinia_convoluta__gene-BCON_0532g00010
Botryotinia_narcissicola__gene-BOTNAR_0001g00690	1	7221	hr_pks	100	Coleophoma_cylindrospora__gene1252	1.83e-237	52.9	hr_pks	sp|L7X8J4|CURS1_ASPTE	1.69e-177	28.6	sp|L7X8J4|CURS1_ASPTE Highly reducing polyketide synthase curS1 OS=Aspergillus terreus OX=33178 GN=curS1 PE=1 SV=1	Botryotinia_narcissicola__gene-BOTNAR_0001g00690
Botryotinia_narcissicola__gene-BOTNAR_0012g00320	1	6758	OTHER	100	BGC0001258__AAN59953.1	2.47e-277	69.8	OTHER	sp|W3X7U2|PFMAE_PESFW	0	47.3	sp|W3X7U2|PFMAE_PESFW Conidial pigment polyketide synthase PfmaE OS=Pestalotiopsis fici (strain W106-1 / CGMCC3.15140) OX=1229662 GN=PfmaE PE=2 SV=1	Botryotinia_narcissicola__gene-BOTNAR_0012g00320
Botryotinia_narcissicola__gene-BOTNAR_0012g00380	1	7928	OTHER	100	BGC0002483__AUW31052.1	1.81e-133	43	OTHER	sp|Q5AZ32|PKBA_EMENI	0	36	sp|Q5AZ32|PKBA_EMENI Non-reducing polyketide synthase pkbA OS=Emericella nidulans (strain FGSC A4 / ATCC 38163 / CBS 112.46 / NRRL 194 / M139) OX=227321 GN=pkbA PE=1 SV=1	Botryotinia_narcissicola__gene-BOTNAR_0012g00380
Botryotinia_narcissicola__gene-BOTNAR_0035g00270	1	6548	OTHER	100	sp|P9WET3|PREU8_PREIS	0	60.2	OTHER	sp|A7UMW1|PKS1_ELSFA	0	46.7	sp|A7UMW1|PKS1_ELSFA Non-reducing polyketide synthase 1 OS=Elsinoe fawcettii OX=40997 GN=PKS1 PE=2 SV=1	Botryotinia_narcissicola__gene-BOTNAR_0035g00270
Botryotinia_narcissicola__gene-BOTNAR_0044g00160	1	7661	hr_pks	100	BGC0001141__AIA58899.1	3.43e-155	49.8	hr_pks	sp|A0A068ABB7|BREF7_EUPBR	0	42.6	sp|A0A068ABB7|BREF7_EUPBR Highly reducing polyketide synthase OS=Eupenicillium brefeldianum OX=1131482 GN=Bref-PKS PE=1 SV=1	Botryotinia_narcissicola__gene-BOTNAR_0044g00160
Botryotinia_narcissicola__gene-BOTNAR_0104g00170	1	6353	OUTLIER	*	None	None	None	None	sp|P34229|FAS1_YARLI	0	58.3	sp|P34229|FAS1_YARLI Fatty acid synthase subunit beta OS=Yarrowia lipolytica (strain CLIB 122 / E 150) OX=284591 GN=FAS1 PE=3 SV=2	Botryotinia_narcissicola__gene-BOTNAR_0104g00170
Botryotinia_narcissicola__gene-BOTNAR_0111g00210	1	5496	OTHER	100	BGC0001284__AKN45693.1	0	72.1	OTHER	sp|A0A0H4ADX3|PKS19_PHANO	0	66.9	sp|A0A0H4ADX3|PKS19_PHANO Non-reducing polyketide synthase PKS19 OS=Phaeosphaeria nodorum (strain SN15 / ATCC MYA-4574 / FGSC 10173) OX=321614 PE=2 SV=1	Botryotinia_narcissicola__gene-BOTNAR_0111g00210
Botryotinia_narcissicola__gene-BOTNAR_0117g00170	1	7491	hr_pks	100	BGC0001724__EPS29069.1	8.16e-274	50.9	hr_pks	sp|A1CLY8|CCSA_ASPCL	0	38.1	sp|A1CLY8|CCSA_ASPCL Polyketide synthase-nonribosomal peptide synthetase OS=Aspergillus clavatus (strain ATCC 1007 / CBS 513.65 / DSM 816 / NCTC 3887 / NRRL 1 / QM 1276 / 107) OX=344612 GN=ccsA PE=3 SV=1	Botryotinia_narcissicola__gene-BOTNAR_0117g00170
Botryotinia_narcissicola__gene-BOTNAR_0187g00020	1	1348	OTHER	100	BGC0002212__ESK96613.1	5.14e-13	24.2	OTHER	sp|P71019|FABD_BACSU	1.99e-39	36.5	sp|P71019|FABD_BACSU Malonyl CoA-acyl carrier protein transacylase OS=Bacillus subtilis (strain 168) OX=224308 GN=fabD PE=3 SV=2	Botryotinia_narcissicola__gene-BOTNAR_0187g00020
Botryotinia_narcissicola__gene-BOTNAR_0215g00160	1	7912	hr_pks	100	BGC0001141__AIA58899.1	4.15e-119	50.2	hr_pks	sp|A0A068ABB7|BREF7_EUPBR	0	35.1	sp|A0A068ABB7|BREF7_EUPBR Highly reducing polyketide synthase OS=Eupenicillium brefeldianum OX=1131482 GN=Bref-PKS PE=1 SV=1	Botryotinia_narcissicola__gene-BOTNAR_0215g00160
Botryotinia_narcissicola__gene-BOTNAR_0233g00070	1	8199	hr_pks	100	aspergillus_uvarum_cbs_121591_gca_003184745__gene___BO82DRAFT_343463	3.32e-118	33.6	hr_pks	sp|A0A3G1DJH7|SQTKS_PHOSM	4.62e-287	31.1	sp|A0A3G1DJH7|SQTKS_PHOSM Squalestatin tetraketide synthase OS=Phoma sp. (strain ATCC 20986 / MF5453) OX=1828523 GN=pks1 PE=1 SV=1	Botryotinia_narcissicola__gene-BOTNAR_0233g00070
Botryotinia_narcissicola__gene-BOTNAR_0328g00050	1	7389	hr_pks	100	BGC0001892__ATZ45185.1	1.58e-303	94.1	hr_pks	sp|G0LET7|BOA9_BOTFB	0	91.6	sp|G0LET7|BOA9_BOTFB Reducing polyketide synthase BOA9 OS=Botryotinia fuckeliana (strain B05.10) OX=332648 GN=BOA9 PE=2 SV=1	Botryotinia_narcissicola__gene-BOTNAR_0328g00050
Botryotinia_narcissicola__gene-BOTNAR_0328g00080	1	7566	hr_pks	100	BGC0001892__ATZ45182.1	0	93.3	hr_pks	sp|B1GVX7|BOA6_BOTFB	0	93.6	sp|B1GVX7|BOA6_BOTFB Reducing polyketide synthase BOA6 OS=Botryotinia fuckeliana (strain B05.10) OX=332648 GN=BOA6 PE=2 SV=1	Botryotinia_narcissicola__gene-BOTNAR_0328g00080
Botryotinia_narcissicola__gene-BOTNAR_0433g00070	1	7969	OTHER	100	sp|A0A8F4SKJ7|ATR1_STEAL	0	58.6	OTHER	sp|A0A455R5P9|ASCC_ACREG	0	45.5	sp|A0A455R5P9|ASCC_ACREG Non-reducing polyketide synthase ascC OS=Acremonium egyptiacum OX=749675 GN=ascC PE=1 SV=1	Botryotinia_narcissicola__gene-BOTNAR_0433g00070
Botryotinia_narcissicola__gene-BOTNAR_0443g00080	1	5908	OTHER	100	BGC0001360__CDM36726.1	2.61e-103	40.6	OTHER	sp|W6QL47|MPAC_PENRF	2.05e-95	40.6	sp|W6QL47|MPAC_PENRF Non-reducing polyketide synthase mapC OS=Penicillium roqueforti (strain FM164) OX=1365484 GN=mpaC PE=3 SV=1	Botryotinia_narcissicola__gene-BOTNAR_0443g00080
Botryotinia_narcissicola__gene-BOTNAR_0510g00040	1	7858	hr_pks	100	BGC0002186__ESU15174.1	0	82.8	hr_pks	sp|I1RVD8|FUSA1_GIBZE	0	82.9	sp|I1RVD8|FUSA1_GIBZE Highly reducing polyketide synthase PKS6 OS=Gibberella zeae (strain ATCC MYA-4620 / CBS 123657 / FGSC 9075 / NRRL 31084 / PH-1) OX=229533 GN=PKS6 PE=3 SV=1	Botryotinia_narcissicola__gene-BOTNAR_0510g00040
Botryotinia_narcissicola__gene-BOTNAR_0605g00030	1	6557	OTHER	100	BGC0000057__EAA59563.1	6.73e-272	52	OTHER	sp|Q5AUX1|ORSA_EMENI	0	46.2	sp|Q5AUX1|ORSA_EMENI Orsellinic acid synthase OS=Emericella nidulans (strain FGSC A4 / ATCC 38163 / CBS 112.46 / NRRL 194 / M139) OX=227321 GN=orsA PE=1 SV=1	Botryotinia_narcissicola__gene-BOTNAR_0605g00030
Botryotinia_narcissicola__gene-BOTNAR_0617g00050	1	795	hr_pks	100	aspergillus_indologenus_cbs_114_80_gca_003184685__gene___BP00DRAFT_195398	1.23e-54	42.4	hr_pks	sp|E5A7D9|PKS5_LEPMJ	4.29e-49	40.8	sp|E5A7D9|PKS5_LEPMJ Highly reducing polyketide synthase pks5 OS=Leptosphaeria maculans (strain JN3 / isolate v23.1.3 / race Av1-4-5-6-7-8) OX=985895 GN=pks5 PE=2 SV=1	Botryotinia_narcissicola__gene-BOTNAR_0617g00050
Botryotinia_narcissicola__gene-BOTNAR_0617g00060	1	612	hr_pks	100	aspergillus_indologenus_cbs_114_80_gca_003184685__gene___BP00DRAFT_195398	3.85e-61	51.3	hr_pks	sp|E5A7D9|PKS5_LEPMJ	1.52e-48	47.6	sp|E5A7D9|PKS5_LEPMJ Highly reducing polyketide synthase pks5 OS=Leptosphaeria maculans (strain JN3 / isolate v23.1.3 / race Av1-4-5-6-7-8) OX=985895 GN=pks5 PE=2 SV=1	Botryotinia_narcissicola__gene-BOTNAR_0617g00060
Botryotinia_narcissicola__gene-BOTNAR_1125g00010	1	1390	OTHER	100	BGC0001244__AIW00670.1	4.16e-26	32.4	OTHER	sp|Q8L3X9|KASM_ARATH	6.5e-118	58.8	sp|Q8L3X9|KASM_ARATH 3-oxoacyl-[acyl-carrier-protein] synthase, mitochondrial OS=Arabidopsis thaliana OX=3702 GN=KAS PE=1 SV=1	Botryotinia_narcissicola__gene-BOTNAR_1125g00010
Botrytis_elliptica__gene-BELL_0004g00320	1	7222	hr_pks	100	Coleophoma_cylindrospora__gene1252	0	60.6	hr_pks	sp|A0A098D8A0|ZEA2_GIBZE	3.56e-224	28.9	sp|A0A098D8A0|ZEA2_GIBZE Highly reducing polyketide synthase ZEA2 OS=Gibberella zeae (strain ATCC MYA-4620 / CBS 123657 / FGSC 9075 / NRRL 31084 / PH-1) OX=229533 GN=ZEA2 PE=2 SV=1	Botrytis_elliptica__gene-BELL_0004g00320
Botrytis_elliptica__gene-BELL_0009g00470	1	7826	hr_pks	100	aspergillus_tubingensis_cbs_134_48_gca_001890745__gene___ASPTUDRAFT_927185	3.63e-128	46.2	hr_pks	sp|Q3S2U6|MOKB_MONPI	4.59e-222	31.2	sp|Q3S2U6|MOKB_MONPI Lovastatin diketide synthase mokB OS=Monascus pilosus OX=89488 GN=mokB PE=1 SV=1	Botrytis_elliptica__gene-BELL_0009g00470
Botrytis_elliptica__gene-BELL_0017g00350	1	8035	hr_pks	100	BGC0000046__ACZ57548.1	1.55e-135	38.1	hr_pks	sp|A0A0N0DCA3|DEP5_FUSLA	1.42e-186	25.8	sp|A0A0N0DCA3|DEP5_FUSLA Reducing polyketide synthase DEP5 OS=Fusarium langsethiae OX=179993 GN=DEP5 PE=2 SV=1	Botrytis_elliptica__gene-BELL_0017g00350
Botrytis_elliptica__gene-BELL_0094g00160	1	7480	hr_pks	100	BGC0001724__EPS29069.1	6.47e-278	51.4	hr_pks	sp|A1CLY8|CCSA_ASPCL	0	38.8	sp|A1CLY8|CCSA_ASPCL Polyketide synthase-nonribosomal peptide synthetase OS=Aspergillus clavatus (strain ATCC 1007 / CBS 513.65 / DSM 816 / NCTC 3887 / NRRL 1 / QM 1276 / 107) OX=344612 GN=ccsA PE=3 SV=1	Botrytis_elliptica__gene-BELL_0094g00160
Botrytis_elliptica__gene-BELL_0102g00090	1	8200	hr_pks	100	aspergillus_calidoustus_gca_001511075__gene___ASPCAL07647	1.4e-92	52.7	hr_pks	sp|A0A3G1DJH7|SQTKS_PHOSM	1.28e-254	34.5	sp|A0A3G1DJH7|SQTKS_PHOSM Squalestatin tetraketide synthase OS=Phoma sp. (strain ATCC 20986 / MF5453) OX=1828523 GN=pks1 PE=1 SV=1	Botrytis_elliptica__gene-BELL_0102g00090
Botrytis_elliptica__gene-BELL_0109g00030	1	8743	hr_pks	100	BGC0002515__KAF9708863.1	2.54e-73	53.6	hr_pks	sp|D7UQ44|SOL1_ALTSO	2.91e-181	28.4	sp|D7UQ44|SOL1_ALTSO Prosolanapyrone synthase OS=Alternaria solani OX=48100 GN=sol1 PE=1 SV=1	Botrytis_elliptica__gene-BELL_0109g00030
Botrytis_elliptica__gene-BELL_0110g00010	1	1348	OTHER	100	BGC0002212__ESK96613.1	9e-13	24.2	OTHER	sp|P71019|FABD_BACSU	5.36e-39	36.5	sp|P71019|FABD_BACSU Malonyl CoA-acyl carrier protein transacylase OS=Bacillus subtilis (strain 168) OX=224308 GN=fabD PE=3 SV=2	Botrytis_elliptica__gene-BELL_0110g00010
Botrytis_elliptica__gene-BELL_0143g00030	1	6758	OTHER	100	BGC0001258__AAN59953.1	8.98e-278	69.8	OTHER	sp|W3X7U2|PFMAE_PESFW	5.84e-309	44.3	sp|W3X7U2|PFMAE_PESFW Conidial pigment polyketide synthase PfmaE OS=Pestalotiopsis fici (strain W106-1 / CGMCC3.15140) OX=1229662 GN=PfmaE PE=2 SV=1	Botrytis_elliptica__gene-BELL_0143g00030
Botrytis_elliptica__gene-BELL_0143g00130	1	7916	OTHER	100	BGC0002483__AUW31052.1	2.07e-132	42.9	OTHER	sp|Q5AZ32|PKBA_EMENI	0	36.2	sp|Q5AZ32|PKBA_EMENI Non-reducing polyketide synthase pkbA OS=Emericella nidulans (strain FGSC A4 / ATCC 38163 / CBS 112.46 / NRRL 194 / M139) OX=227321 GN=pkbA PE=1 SV=1	Botrytis_elliptica__gene-BELL_0143g00130
Botrytis_elliptica__gene-BELL_0327g00010	1	715	hr_pks	100	aspergillus_calidoustus_gca_001511075__gene___ASPCAL07647	9.97e-50	51.6	hr_pks	sp|Q9Y7D5|LOVF_ASPTE	2.56e-39	46.2	sp|Q9Y7D5|LOVF_ASPTE Lovastatin diketide synthase lovF OS=Aspergillus terreus OX=33178 GN=lovF PE=1 SV=1	Botrytis_elliptica__gene-BELL_0327g00010
Botrytis_elliptica__gene-BELL_0351g00040	1	7413	hr_pks	100	sp|A0A0N0DCA3|DEP5_FUSLA	8.57e-145	39.2	hr_pks	sp|A0A0N0DCA3|DEP5_FUSLA	1.73e-287	33	sp|A0A0N0DCA3|DEP5_FUSLA Reducing polyketide synthase DEP5 OS=Fusarium langsethiae OX=179993 GN=DEP5 PE=2 SV=1	Botrytis_elliptica__gene-BELL_0351g00040
Botrytis_elliptica__gene-BELL_0396g00080	1	6353	OUTLIER	*	None	None	None	None	sp|P34229|FAS1_YARLI	0	58.9	sp|P34229|FAS1_YARLI Fatty acid synthase subunit beta OS=Yarrowia lipolytica (strain CLIB 122 / E 150) OX=284591 GN=FAS1 PE=3 SV=2	Botrytis_elliptica__gene-BELL_0396g00080
Botrytis_elliptica__gene-BELL_0412g00030	1	6556	OTHER	100	sp|P9WET3|PREU8_PREIS	0	60.1	OTHER	sp|A7UMW1|PKS1_ELSFA	0	46.8	sp|A7UMW1|PKS1_ELSFA Non-reducing polyketide synthase 1 OS=Elsinoe fawcettii OX=40997 GN=PKS1 PE=2 SV=1	Botrytis_elliptica__gene-BELL_0412g00030
Botrytis_elliptica__gene-BELL_0531g00040	1	7234	OTHER	100	sp|P9WET2|PREU6_PREIS	2.62e-187	48.9	OTHER	sp|Q0CRQ5|5MOAS_ASPTN	8.3e-232	31	sp|Q0CRQ5|5MOAS_ASPTN 5-methylorsellinic acid synthase OS=Aspergillus terreus (strain NIH 2624 / FGSC A1156) OX=341663 GN=ATEG_03629 PE=1 SV=1	Botrytis_elliptica__gene-BELL_0531g00040
Botrytis_elliptica__gene-BELL_0624g00050	1	5499	OTHER	100	BGC0001284__AKN45693.1	0	71.5	OTHER	sp|A0A0H4ADX3|PKS19_PHANO	0	66.6	sp|A0A0H4ADX3|PKS19_PHANO Non-reducing polyketide synthase PKS19 OS=Phaeosphaeria nodorum (strain SN15 / ATCC MYA-4574 / FGSC 10173) OX=321614 PE=2 SV=1	Botrytis_elliptica__gene-BELL_0624g00050
Botrytis_elliptica__gene-BELL_0652g00030	1	6555	OTHER	100	BGC0000057__EAA59563.1	3.15e-273	52.2	OTHER	sp|Q5AUX1|ORSA_EMENI	0	46.4	sp|Q5AUX1|ORSA_EMENI Orsellinic acid synthase OS=Emericella nidulans (strain FGSC A4 / ATCC 38163 / CBS 112.46 / NRRL 194 / M139) OX=227321 GN=orsA PE=1 SV=1	Botrytis_elliptica__gene-BELL_0652g00030
Botrytis_elliptica__gene-BELL_0821g00020	1	7969	OTHER	100	sp|A0A8F4SKJ7|ATR1_STEAL	0	59.7	OTHER	sp|A0A455R5P9|ASCC_ACREG	0	45.2	sp|A0A455R5P9|ASCC_ACREG Non-reducing polyketide synthase ascC OS=Acremonium egyptiacum OX=749675 GN=ascC PE=1 SV=1	Botrytis_elliptica__gene-BELL_0821g00020
Botrytis_elliptica__gene-BELL_1067g00030	1	754	hr_pks	100	aspergillus_uvarum_cbs_121591_gca_003184745__gene___BO82DRAFT_343463	4.69e-27	42	hr_pks	sp|G4NEB1|NEC1_MAGO7	6.77e-49	37.7	sp|G4NEB1|NEC1_MAGO7 Highly reducing polyketide synthase NEC1 OS=Magnaporthe oryzae (strain 70-15 / ATCC MYA-4617 / FGSC 8958) OX=242507 GN=NEC1 PE=1 SV=1	Botrytis_elliptica__gene-BELL_1067g00030
Botrytis_elliptica__gene-BELL_1078g00020	1	1390	OTHER	100	BGC0001244__AIW00670.1	1.74e-26	33.3	OTHER	sp|Q8L3X9|KASM_ARATH	2.35e-115	58.2	sp|Q8L3X9|KASM_ARATH 3-oxoacyl-[acyl-carrier-protein] synthase, mitochondrial OS=Arabidopsis thaliana OX=3702 GN=KAS PE=1 SV=1	Botrytis_elliptica__gene-BELL_1078g00020
Botrytis_elliptica__gene-BELL_1519g00010	1	795	hr_pks	100	BGC0001892__ATZ45185.1	3.49e-139	85.7	hr_pks	sp|G0LET7|BOA9_BOTFB	4.27e-129	85.3	sp|G0LET7|BOA9_BOTFB Reducing polyketide synthase BOA9 OS=Botryotinia fuckeliana (strain B05.10) OX=332648 GN=BOA9 PE=2 SV=1	Botrytis_elliptica__gene-BELL_1519g00010
Botrytis_elliptica__gene-BELL_1519g00020	1	450	hr_pks	100	sp|G0LET7|BOA9_BOTFB	1.25e-59	82.4	hr_pks	sp|G0LET7|BOA9_BOTFB	4.57e-74	83.2	sp|G0LET7|BOA9_BOTFB Reducing polyketide synthase BOA9 OS=Botryotinia fuckeliana (strain B05.10) OX=332648 GN=BOA9 PE=2 SV=1	Botrytis_elliptica__gene-BELL_1519g00020
Botrytis_fragariae__gene-Bfra_000186	1	7584	hr_pks	100	BGC0002211__OAG05545.1	2.44e-213	53.2	hr_pks	sp|A0A068ABB7|BREF7_EUPBR	1.17e-294	36.6	sp|A0A068ABB7|BREF7_EUPBR Highly reducing polyketide synthase OS=Eupenicillium brefeldianum OX=1131482 GN=Bref-PKS PE=1 SV=1	Botrytis_fragariae__gene-Bfra_000186
Botrytis_fragariae__gene-Bfra_000613	1	12186	hr_pks	100	BGC0001892__ATZ45182.1	5.68e-299	55.1	hr_pks	sp|A0A6J4B487|LUC5_FUSSX	0	38.1	sp|A0A6J4B487|LUC5_FUSSX Hybrid PKS-NRPS synthetase LUC5 OS=Fusarium sp. OX=29916 GN=LUC5 PE=3 SV=1	Botrytis_fragariae__gene-Bfra_000613
Botrytis_fragariae__gene-Bfra_001077	1	6353	OUTLIER	*	None	None	None	None	sp|P34229|FAS1_YARLI	0	58.8	sp|P34229|FAS1_YARLI Fatty acid synthase subunit beta OS=Yarrowia lipolytica (strain CLIB 122 / E 150) OX=284591 GN=FAS1 PE=3 SV=2	Botrytis_fragariae__gene-Bfra_001077
Botrytis_fragariae__gene-Bfra_002349	1	7922	hr_pks	100	BGC0001141__AIA58899.1	4.6e-167	45.6	hr_pks	sp|A0A068ABB7|BREF7_EUPBR	0	35.7	sp|A0A068ABB7|BREF7_EUPBR Highly reducing polyketide synthase OS=Eupenicillium brefeldianum OX=1131482 GN=Bref-PKS PE=1 SV=1	Botrytis_fragariae__gene-Bfra_002349
Botrytis_fragariae__gene-Bfra_003066	1	688	OUTLIER	*	None	None	None	None	None	None	None	None	Botrytis_fragariae__gene-Bfra_003066
Botrytis_fragariae__gene-Bfra_003157	1	6759	OTHER	100	BGC0001258__AAN59953.1	1.21e-272	68.9	OTHER	sp|W3X7U2|PFMAE_PESFW	4.18e-309	33.6	sp|W3X7U2|PFMAE_PESFW Conidial pigment polyketide synthase PfmaE OS=Pestalotiopsis fici (strain W106-1 / CGMCC3.15140) OX=1229662 GN=PfmaE PE=2 SV=1	Botrytis_fragariae__gene-Bfra_003157
Botrytis_fragariae__gene-Bfra_003166	1	10075	OTHER	100	BGC0002483__AUW31052.1	1.36e-133	44.2	OTHER	sp|Q5AZ32|PKBA_EMENI	5.95e-307	37.4	sp|Q5AZ32|PKBA_EMENI Non-reducing polyketide synthase pkbA OS=Emericella nidulans (strain FGSC A4 / ATCC 38163 / CBS 112.46 / NRRL 194 / M139) OX=227321 GN=pkbA PE=1 SV=1	Botrytis_fragariae__gene-Bfra_003166
Botrytis_fragariae__gene-Bfra_003695	1	7857	hr_pks	100	BGC0002186__ESU15174.1	0	83.9	hr_pks	sp|I1RVD8|FUSA1_GIBZE	0	84	sp|I1RVD8|FUSA1_GIBZE Highly reducing polyketide synthase PKS6 OS=Gibberella zeae (strain ATCC MYA-4620 / CBS 123657 / FGSC 9075 / NRRL 31084 / PH-1) OX=229533 GN=PKS6 PE=3 SV=1	Botrytis_fragariae__gene-Bfra_003695
Botrytis_fragariae__gene-Bfra_004037	1	7566	hr_pks	100	BGC0001892__ATZ45182.1	0	95	hr_pks	sp|B1GVX7|BOA6_BOTFB	0	95.1	sp|B1GVX7|BOA6_BOTFB Reducing polyketide synthase BOA6 OS=Botryotinia fuckeliana (strain B05.10) OX=332648 GN=BOA6 PE=2 SV=1	Botrytis_fragariae__gene-Bfra_004037
Botrytis_fragariae__gene-Bfra_004040	1	7404	hr_pks	100	BGC0001892__ATZ45185.1	0	71.8	hr_pks	sp|G0LET7|BOA9_BOTFB	0	81.2	sp|G0LET7|BOA9_BOTFB Reducing polyketide synthase BOA9 OS=Botryotinia fuckeliana (strain B05.10) OX=332648 GN=BOA9 PE=2 SV=1	Botrytis_fragariae__gene-Bfra_004040
Botrytis_fragariae__gene-Bfra_004489	1	7218	hr_pks	100	Coleophoma_cylindrospora__gene1252	9.68e-235	52.7	hr_pks	sp|L7X8J4|CURS1_ASPTE	1.37e-176	28.3	sp|L7X8J4|CURS1_ASPTE Highly reducing polyketide synthase curS1 OS=Aspergillus terreus OX=33178 GN=curS1 PE=1 SV=1	Botrytis_fragariae__gene-Bfra_004489
Botrytis_fragariae__gene-Bfra_005559	1	8242	hr_pks	100	talaromyces_islandicus_gca_000985935__gene___PISL3812_01117	7.23e-75	30.1	hr_pks	sp|Q0CF75|AZPB1_ASPTN	2.37e-223	27.7	sp|Q0CF75|AZPB1_ASPTN Highly reducing polyketide synthase ATEG_07659 OS=Aspergillus terreus (strain NIH 2624 / FGSC A1156) OX=341663 GN=ATEG_07659 PE=1 SV=1	Botrytis_fragariae__gene-Bfra_005559
Botrytis_fragariae__gene-Bfra_007054	1	7582	hr_pks	100	BGC0002234__EYE95336.1	2.05e-129	34	hr_pks	sp|G9N4B2|VIRA_HYPVG	7.47e-228	35.2	sp|G9N4B2|VIRA_HYPVG Highly reducing polyketide synthase virA OS=Hypocrea virens (strain Gv29-8 / FGSC 10586) OX=413071 GN=virA PE=1 SV=1	Botrytis_fragariae__gene-Bfra_007054
Botrytis_fragariae__gene-Bfra_007587la	1	7969	OTHER	100	sp|A0A8F4SKJ7|ATR1_STEAL	0	58	OTHER	sp|A0A455R5P9|ASCC_ACREG	0	46.2	sp|A0A455R5P9|ASCC_ACREG Non-reducing polyketide synthase ascC OS=Acremonium egyptiacum OX=749675 GN=ascC PE=1 SV=1	Botrytis_fragariae__gene-Bfra_007587la
Botrytis_fragariae__gene-Bfra_007867	1	1390	OTHER	100	BGC0001244__AIW00670.1	3.11e-26	33.3	OTHER	sp|Q8L3X9|KASM_ARATH	3.67e-117	58.2	sp|Q8L3X9|KASM_ARATH 3-oxoacyl-[acyl-carrier-protein] synthase, mitochondrial OS=Arabidopsis thaliana OX=3702 GN=KAS PE=1 SV=1	Botrytis_fragariae__gene-Bfra_007867
Botrytis_fragariae__gene-Bfra_007931	1	5497	OTHER	100	BGC0001284__AKN45693.1	7.25e-232	63.1	OTHER	sp|A0A0H4ADX3|PKS19_PHANO	3.37e-294	63.1	sp|A0A0H4ADX3|PKS19_PHANO Non-reducing polyketide synthase PKS19 OS=Phaeosphaeria nodorum (strain SN15 / ATCC MYA-4574 / FGSC 10173) OX=321614 PE=2 SV=1	Botrytis_fragariae__gene-Bfra_007931
Botrytis_fragariae__gene-Bfra_008040	1	6557	OTHER	100	BGC0000057__EAA59563.1	3.42e-272	51.2	OTHER	sp|Q5AUX1|ORSA_EMENI	0	45.8	sp|Q5AUX1|ORSA_EMENI Orsellinic acid synthase OS=Emericella nidulans (strain FGSC A4 / ATCC 38163 / CBS 112.46 / NRRL 194 / M139) OX=227321 GN=orsA PE=1 SV=1	Botrytis_fragariae__gene-Bfra_008040
Botrytis_fragariae__gene-Bfra_009031	1	1011	hr_pks	100	BGC0002240__KFG78606.1	1.87e-136	74.7	hr_pks	sp|P0DUT7|BA17A_METAN	3.49e-127	74.7	sp|P0DUT7|BA17A_METAN Highly reducing polyketide synthase 17 OS=Metarhizium anisopliae OX=5530 GN=Ba17a PE=1 SV=1	Botrytis_fragariae__gene-Bfra_009031
Botrytis_fragariae__gene-Bfra_010231lb	1	8507	hr_pks	100	aspergillus_calidoustus_gca_001511075__gene___ASPCAL07647	3.05e-94	31.3	hr_pks	sp|Q86ZD9|SQTKS_PHOSC	3.71e-279	28.5	sp|Q86ZD9|SQTKS_PHOSC Squalestatin tetraketide synthase OS=Phoma sp. (strain C2932) OX=86977 GN=pks1 PE=1 SV=1	Botrytis_fragariae__gene-Bfra_010231lb
Botrytis_fragariae__gene-Bfra_010422	1	7481	hr_pks	100	BGC0001724__EPS29069.1	7.91e-273	51.4	hr_pks	sp|A0A7L8UVC9|FFSA_ASPFV	0	38.3	sp|A0A7L8UVC9|FFSA_ASPFV Polyketide synthase-nonribosomal peptide synthetase ffsA OS=Aspergillus flavipes OX=41900 GN=ffsA PE=3 SV=1	Botrytis_fragariae__gene-Bfra_010422
Botrytis_fragariae__gene-Bfra_011250	1	8747	hr_pks	100	BGC0000146__BAJ09789.1	1.73e-81	40.5	hr_pks	sp|D7UQ44|SOL1_ALTSO	5.08e-160	24.1	sp|D7UQ44|SOL1_ALTSO Prosolanapyrone synthase OS=Alternaria solani OX=48100 GN=sol1 PE=1 SV=1	Botrytis_fragariae__gene-Bfra_011250
Botrytis_fragariae__gene-Bfra_011315	1	1348	OTHER	100	BGC0002212__ESK96613.1	5.14e-13	24.2	OTHER	sp|P71019|FABD_BACSU	1.43e-39	36.5	sp|P71019|FABD_BACSU Malonyl CoA-acyl carrier protein transacylase OS=Bacillus subtilis (strain 168) OX=224308 GN=fabD PE=3 SV=2	Botrytis_fragariae__gene-Bfra_011315
Botrytis_fragariae__gene-Bfra_011440	1	6831	OTHER	100	sp|P9WET3|PREU8_PREIS	0	60.1	OTHER	sp|A7UMW1|PKS1_ELSFA	0	47.3	sp|A7UMW1|PKS1_ELSFA Non-reducing polyketide synthase 1 OS=Elsinoe fawcettii OX=40997 GN=PKS1 PE=2 SV=1	Botrytis_fragariae__gene-Bfra_011440
Botrytis_fragariae__gene-Bfra_011644	1	8286	hr_pks	100	BGC0001141__AIA58899.1	2.52e-206	48.7	hr_pks	sp|A0A068ABB7|BREF7_EUPBR	0	43	sp|A0A068ABB7|BREF7_EUPBR Highly reducing polyketide synthase OS=Eupenicillium brefeldianum OX=1131482 GN=Bref-PKS PE=1 SV=1	Botrytis_fragariae__gene-Bfra_011644
Botrytis_galanthina__gene-BGAL_0003g00620	1	7472	hr_pks	100	BGC0001724__EPS29069.1	2.54e-275	50.8	hr_pks	sp|I1S166|FSL1_GIBZE	0	38.2	sp|I1S166|FSL1_GIBZE Fusarielin synthase FSL1 OS=Gibberella zeae (strain ATCC MYA-4620 / CBS 123657 / FGSC 9075 / NRRL 31084 / PH-1) OX=229533 GN=FSL1 PE=2 SV=1	Botrytis_galanthina__gene-BGAL_0003g00620
Botrytis_galanthina__gene-BGAL_0004g00460	1	8201	hr_pks	100	aspergillus_tubingensis_cbs_134_48_gca_001890745__gene___ASPTUDRAFT_927185	6.08e-280	46.9	hr_pks	sp|G3XMD1|AZAB_ASPNA	5.99e-300	31.2	sp|G3XMD1|AZAB_ASPNA Highly reducing polyketide synthase azaB OS=Aspergillus niger (strain ATCC 1015 / CBS 113.46 / FGSC A1144 / LSHB Ac4 / NCTC 3858a / NRRL 328 / USDA 3528.7) OX=380704 GN=azaB PE=1 SV=1	Botrytis_galanthina__gene-BGAL_0004g00460
Botrytis_galanthina__gene-BGAL_0011g00280	1	7674	hr_pks	100	BGC0001141__AIA58899.1	1.07e-160	51.2	hr_pks	sp|A0A068ABB7|BREF7_EUPBR	0	42.9	sp|A0A068ABB7|BREF7_EUPBR Highly reducing polyketide synthase OS=Eupenicillium brefeldianum OX=1131482 GN=Bref-PKS PE=1 SV=1	Botrytis_galanthina__gene-BGAL_0011g00280
Botrytis_galanthina__gene-BGAL_0017g00410	1	5391	hr_pks	100	BGC0000046__ACZ57548.1	4.77e-74	47.6	hr_pks	sp|D2E9X0|DEP5_ALTBR	2.65e-113	26.3	sp|D2E9X0|DEP5_ALTBR Reducing polyketide synthase DEP5 OS=Alternaria brassicicola OX=29001 GN=DEP5 PE=2 SV=1	Botrytis_galanthina__gene-BGAL_0017g00410
Botrytis_galanthina__gene-BGAL_0036g00340	1	4301	hr_pks	100	BGC0002525__BBU37368.1	1.14e-245	49.2	hr_pks	sp|A0A6S5ZY48|G433_FUSSX	0	52.1	sp|A0A6S5ZY48|G433_FUSSX Highly reducing polyketide synthase g433 OS=Fusarium sp. OX=29916 GN=g433 PE=2 SV=1	Botrytis_galanthina__gene-BGAL_0036g00340
Botrytis_galanthina__gene-BGAL_0037g00440	1	8513	hr_pks	100	dibaeis_baeomyces__gene_5150	5.61e-85	34.2	hr_pks	sp|G3XMD1|AZAB_ASPNA	6.48e-233	27.4	sp|G3XMD1|AZAB_ASPNA Highly reducing polyketide synthase azaB OS=Aspergillus niger (strain ATCC 1015 / CBS 113.46 / FGSC A1144 / LSHB Ac4 / NCTC 3858a / NRRL 328 / USDA 3528.7) OX=380704 GN=azaB PE=1 SV=1	Botrytis_galanthina__gene-BGAL_0037g00440
Botrytis_galanthina__gene-BGAL_0045g00080	1	6757	OTHER	100	BGC0001258__AAN59953.1	1.01e-275	69.7	OTHER	sp|W3X7U2|PFMAE_PESFW	3.1e-308	42.3	sp|W3X7U2|PFMAE_PESFW Conidial pigment polyketide synthase PfmaE OS=Pestalotiopsis fici (strain W106-1 / CGMCC3.15140) OX=1229662 GN=PfmaE PE=2 SV=1	Botrytis_galanthina__gene-BGAL_0045g00080
Botrytis_galanthina__gene-BGAL_0045g00150	1	7941	OTHER	100	BGC0002483__AUW31052.1	3.47e-135	44.2	OTHER	sp|Q5AZ32|PKBA_EMENI	0	31.2	sp|Q5AZ32|PKBA_EMENI Non-reducing polyketide synthase pkbA OS=Emericella nidulans (strain FGSC A4 / ATCC 38163 / CBS 112.46 / NRRL 194 / M139) OX=227321 GN=pkbA PE=1 SV=1	Botrytis_galanthina__gene-BGAL_0045g00150
Botrytis_galanthina__gene-BGAL_0049g00390	1	8346	hr_pks	100	aspergillus_uvarum_cbs_121591_gca_003184745__gene___BO82DRAFT_343463	6.88e-93	29.3	hr_pks	sp|Q5KTM9|ALT5_ALTSO	1.49e-175	27.9	sp|Q5KTM9|ALT5_ALTSO Highly reducing polyketide synthase alt5 OS=Alternaria solani OX=48100 GN=alt5 PE=1 SV=1	Botrytis_galanthina__gene-BGAL_0049g00390
Botrytis_galanthina__gene-BGAL_0050g00300	1	8092	hr_pks	100	BGC0001749__EHA52508.1	2.55e-131	34.1	hr_pks	sp|Q7SHI6|SRDA_NEUCR	0	32	sp|Q7SHI6|SRDA_NEUCR Highly reducing polyketide synthase srdA OS=Neurospora crassa (strain ATCC 24698 / 74-OR23-1A / CBS 708.71 / DSM 1257 / FGSC 987) OX=367110 GN=srdA PE=2 SV=1	Botrytis_galanthina__gene-BGAL_0050g00300
Botrytis_galanthina__gene-BGAL_0051g00170	1	7969	OTHER	100	sp|A0A8F4SKJ7|ATR1_STEAL	0	59	OTHER	sp|A0A455R5P9|ASCC_ACREG	0	45.6	sp|A0A455R5P9|ASCC_ACREG Non-reducing polyketide synthase ascC OS=Acremonium egyptiacum OX=749675 GN=ascC PE=1 SV=1	Botrytis_galanthina__gene-BGAL_0051g00170
Botrytis_galanthina__gene-BGAL_0064g00090	1	5502	hr_pks	100	Aspergillus_fijiensis__gene3494	2.95e-105	37.8	hr_pks	sp|E5A7D9|PKS5_LEPMJ	7.79e-93	38.3	sp|E5A7D9|PKS5_LEPMJ Highly reducing polyketide synthase pks5 OS=Leptosphaeria maculans (strain JN3 / isolate v23.1.3 / race Av1-4-5-6-7-8) OX=985895 GN=pks5 PE=2 SV=1	Botrytis_galanthina__gene-BGAL_0064g00090
Botrytis_galanthina__gene-BGAL_0072g00200	1	7858	hr_pks	100	BGC0002186__ESU15174.1	0	83.7	hr_pks	sp|I1RVD8|FUSA1_GIBZE	0	83.8	sp|I1RVD8|FUSA1_GIBZE Highly reducing polyketide synthase PKS6 OS=Gibberella zeae (strain ATCC MYA-4620 / CBS 123657 / FGSC 9075 / NRRL 31084 / PH-1) OX=229533 GN=PKS6 PE=3 SV=1	Botrytis_galanthina__gene-BGAL_0072g00200
Botrytis_galanthina__gene-BGAL_0086g00290	1	7219	hr_pks	100	Coleophoma_cylindrospora__gene1252	0	60.1	hr_pks	sp|A0A098D8A0|ZEA2_GIBZE	9.55e-221	29.2	sp|A0A098D8A0|ZEA2_GIBZE Highly reducing polyketide synthase ZEA2 OS=Gibberella zeae (strain ATCC MYA-4620 / CBS 123657 / FGSC 9075 / NRRL 31084 / PH-1) OX=229533 GN=ZEA2 PE=2 SV=1	Botrytis_galanthina__gene-BGAL_0086g00290
Botrytis_galanthina__gene-BGAL_0108g00090	1	8324	hr_pks	99.9	BGC0001373__BAV32159.1	1.01e-111	44.1	hr_pks	sp|A0A1B4XBH3|SDNO_SORAA	3.06e-316	31.9	sp|A0A1B4XBH3|SDNO_SORAA Highly reducing polyketide synthase sdnO OS=Sordaria araneosa OX=573841 GN=sdnO PE=3 SV=1	Botrytis_galanthina__gene-BGAL_0108g00090
Botrytis_galanthina__gene-BGAL_0121g00120	1	7769	hr_pks	100	aspergillus_brasiliensis_cbs_101740_gca_001889945__gene___ASPBRDRAFT_199676	4.64e-124	37.8	hr_pks	sp|N4WHE3|PKS1_COCH4	2.87e-165	26.3	sp|N4WHE3|PKS1_COCH4 Reducing polyketide synthase PKS1 OS=Cochliobolus heterostrophus (strain C4 / ATCC 48331 / race T) OX=665024 GN=PKS1 PE=3 SV=1	Botrytis_galanthina__gene-BGAL_0121g00120
Botrytis_galanthina__gene-BGAL_0128g00130	1	6548	OTHER	100	sp|P9WET3|PREU8_PREIS	0	59.7	OTHER	sp|A7UMW1|PKS1_ELSFA	0	46.4	sp|A7UMW1|PKS1_ELSFA Non-reducing polyketide synthase 1 OS=Elsinoe fawcettii OX=40997 GN=PKS1 PE=2 SV=1	Botrytis_galanthina__gene-BGAL_0128g00130
Botrytis_galanthina__gene-BGAL_0174g00100	1	6968	hr_pks	100	BGC0002515__KAF9708863.1	4.39e-116	32.6	hr_pks	sp|D7UQ44|SOL1_ALTSO	1.51e-140	27.3	sp|D7UQ44|SOL1_ALTSO Prosolanapyrone synthase OS=Alternaria solani OX=48100 GN=sol1 PE=1 SV=1	Botrytis_galanthina__gene-BGAL_0174g00100
Botrytis_galanthina__gene-BGAL_0182g00180	1	5506	OTHER	100	BGC0001284__AKN45693.1	0	70.7	OTHER	sp|A0A0H4ADX3|PKS19_PHANO	0	66.9	sp|A0A0H4ADX3|PKS19_PHANO Non-reducing polyketide synthase PKS19 OS=Phaeosphaeria nodorum (strain SN15 / ATCC MYA-4574 / FGSC 10173) OX=321614 PE=2 SV=1	Botrytis_galanthina__gene-BGAL_0182g00180
Botrytis_galanthina__gene-BGAL_0187g00010	1	1348	OTHER	100	BGC0002212__ESK96613.1	5.14e-13	24.2	OTHER	sp|P71019|FABD_BACSU	1.43e-39	36.5	sp|P71019|FABD_BACSU Malonyl CoA-acyl carrier protein transacylase OS=Bacillus subtilis (strain 168) OX=224308 GN=fabD PE=3 SV=2	Botrytis_galanthina__gene-BGAL_0187g00010
Botrytis_galanthina__gene-BGAL_0189g00030	1	6557	OTHER	100	BGC0002596__CCE33500.1	7.8e-272	50.6	OTHER	sp|Q5AUX1|ORSA_EMENI	0	46.3	sp|Q5AUX1|ORSA_EMENI Orsellinic acid synthase OS=Emericella nidulans (strain FGSC A4 / ATCC 38163 / CBS 112.46 / NRRL 194 / M139) OX=227321 GN=orsA PE=1 SV=1	Botrytis_galanthina__gene-BGAL_0189g00030
Botrytis_galanthina__gene-BGAL_0270g00020	1	8199	hr_pks	100	aspergillus_calidoustus_gca_001511075__gene___ASPCAL07647	7.09e-94	51.7	hr_pks	sp|A0A3G1DJH7|SQTKS_PHOSM	1.98e-290	32.6	sp|A0A3G1DJH7|SQTKS_PHOSM Squalestatin tetraketide synthase OS=Phoma sp. (strain ATCC 20986 / MF5453) OX=1828523 GN=pks1 PE=1 SV=1	Botrytis_galanthina__gene-BGAL_0270g00020
Botrytis_galanthina__gene-BGAL_0292g00120	1	6353	OUTLIER	*	None	None	None	None	sp|P34229|FAS1_YARLI	0	58.7	sp|P34229|FAS1_YARLI Fatty acid synthase subunit beta OS=Yarrowia lipolytica (strain CLIB 122 / E 150) OX=284591 GN=FAS1 PE=3 SV=2	Botrytis_galanthina__gene-BGAL_0292g00120
Botrytis_galanthina__gene-BGAL_0385g00040	1	8282	OTHER	100	BGC0001338__ALI92655.1	0	55.7	OTHER	sp|Q65Z23|CITS_MONPU	0	58.9	sp|Q65Z23|CITS_MONPU Citrinin polyketide synthase OS=Monascus purpureus OX=5098 GN=pksCT PE=1 SV=2	Botrytis_galanthina__gene-BGAL_0385g00040
Botrytis_galanthina__gene-BGAL_0399g00060	1	8565	OTHER	100	BGC0001338__ALI92655.1	1.55e-123	44.6	OTHER	sp|Q5AZ32|PKBA_EMENI	2.94e-173	28	sp|Q5AZ32|PKBA_EMENI Non-reducing polyketide synthase pkbA OS=Emericella nidulans (strain FGSC A4 / ATCC 38163 / CBS 112.46 / NRRL 194 / M139) OX=227321 GN=pkbA PE=1 SV=1	Botrytis_galanthina__gene-BGAL_0399g00060
Botrytis_galanthina__gene-BGAL_0408g00010	1	13082	hr_pks	100	BGC0000983__EAW09117.1	6.93e-165	62.6	hr_pks	sp|A0A0G0AID6|THNA_TRIHA	0	31.2	sp|A0A0G0AID6|THNA_TRIHA Hybrid PKS-NRPS synthetase thnA OS=Trichoderma harzianum OX=5544 GN=thnA PE=1 SV=1	Botrytis_galanthina__gene-BGAL_0408g00010
Botrytis_galanthina__gene-BGAL_0534g00030	1	1390	OTHER	100	BGC0001244__AIW00670.1	1.33e-25	32.9	OTHER	sp|Q8L3X9|KASM_ARATH	8.3e-116	58.5	sp|Q8L3X9|KASM_ARATH 3-oxoacyl-[acyl-carrier-protein] synthase, mitochondrial OS=Arabidopsis thaliana OX=3702 GN=KAS PE=1 SV=1	Botrytis_galanthina__gene-BGAL_0534g00030
Botrytis_galanthina__gene-BGAL_0838g00040	1	1610	hr_pks	100	BGC0001892__ATZ45185.1	3.1e-136	48.3	hr_pks	sp|G0LET7|BOA9_BOTFB	5.18e-126	48.1	sp|G0LET7|BOA9_BOTFB Reducing polyketide synthase BOA9 OS=Botryotinia fuckeliana (strain B05.10) OX=332648 GN=BOA9 PE=2 SV=1	Botrytis_galanthina__gene-BGAL_0838g00040
Botrytis_hyacinthi__gene-BHYA_0005g00590	1	8199	hr_pks	100	aspergillus_calidoustus_gca_001511075__gene___ASPCAL07647	1.4e-92	52.7	hr_pks	sp|A0A3G1DJH7|SQTKS_PHOSM	1.46e-245	33	sp|A0A3G1DJH7|SQTKS_PHOSM Squalestatin tetraketide synthase OS=Phoma sp. (strain ATCC 20986 / MF5453) OX=1828523 GN=pks1 PE=1 SV=1	Botrytis_hyacinthi__gene-BHYA_0005g00590
Botrytis_hyacinthi__gene-BHYA_0012g00590	1	6764	OTHER	100	BGC0001258__AAN59953.1	2.42e-278	70.2	OTHER	sp|W3X7U2|PFMAE_PESFW	0	47.7	sp|W3X7U2|PFMAE_PESFW Conidial pigment polyketide synthase PfmaE OS=Pestalotiopsis fici (strain W106-1 / CGMCC3.15140) OX=1229662 GN=PfmaE PE=2 SV=1	Botrytis_hyacinthi__gene-BHYA_0012g00590
Botrytis_hyacinthi__gene-BHYA_0012g00650	1	7913	OTHER	100	BGC0002483__AUW31052.1	1.38e-135	43.4	OTHER	sp|Q5AZ32|PKBA_EMENI	0	32.4	sp|Q5AZ32|PKBA_EMENI Non-reducing polyketide synthase pkbA OS=Emericella nidulans (strain FGSC A4 / ATCC 38163 / CBS 112.46 / NRRL 194 / M139) OX=227321 GN=pkbA PE=1 SV=1	Botrytis_hyacinthi__gene-BHYA_0012g00650
Botrytis_hyacinthi__gene-BHYA_0044g00170	1	7968	OTHER	100	sp|A0A8F4SKJ7|ATR1_STEAL	0	59	OTHER	sp|A0A455R5P9|ASCC_ACREG	0	45.4	sp|A0A455R5P9|ASCC_ACREG Non-reducing polyketide synthase ascC OS=Acremonium egyptiacum OX=749675 GN=ascC PE=1 SV=1	Botrytis_hyacinthi__gene-BHYA_0044g00170
Botrytis_hyacinthi__gene-BHYA_0060g00220	1	7469	hr_pks	100	BGC0001724__EPS29069.1	1.93e-273	51.2	hr_pks	sp|A0A7L8UVC9|FFSA_ASPFV	0	38.2	sp|A0A7L8UVC9|FFSA_ASPFV Polyketide synthase-nonribosomal peptide synthetase ffsA OS=Aspergillus flavipes OX=41900 GN=ffsA PE=3 SV=1	Botrytis_hyacinthi__gene-BHYA_0060g00220
Botrytis_hyacinthi__gene-BHYA_0070g00140	1	8743	hr_pks	100	BGC0002515__KAF9708863.1	6.39e-83	31.7	hr_pks	sp|D7UQ44|SOL1_ALTSO	2.35e-167	25.3	sp|D7UQ44|SOL1_ALTSO Prosolanapyrone synthase OS=Alternaria solani OX=48100 GN=sol1 PE=1 SV=1	Botrytis_hyacinthi__gene-BHYA_0070g00140
Botrytis_hyacinthi__gene-BHYA_0097g00160	1	1348	OTHER	100	BGC0002212__ESK96613.1	2.76e-12	24.2	OTHER	sp|P71019|FABD_BACSU	2.77e-39	36.8	sp|P71019|FABD_BACSU Malonyl CoA-acyl carrier protein transacylase OS=Bacillus subtilis (strain 168) OX=224308 GN=fabD PE=3 SV=2	Botrytis_hyacinthi__gene-BHYA_0097g00160
Botrytis_hyacinthi__gene-BHYA_0119g00220	1	6548	OTHER	100	sp|P9WET3|PREU8_PREIS	0	60.1	OTHER	sp|A7UMW1|PKS1_ELSFA	0	46.6	sp|A7UMW1|PKS1_ELSFA Non-reducing polyketide synthase 1 OS=Elsinoe fawcettii OX=40997 GN=PKS1 PE=2 SV=1	Botrytis_hyacinthi__gene-BHYA_0119g00220
Botrytis_hyacinthi__gene-BHYA_0124g00270	1	6353	OUTLIER	*	None	None	None	None	sp|P34229|FAS1_YARLI	0	58.6	sp|P34229|FAS1_YARLI Fatty acid synthase subunit beta OS=Yarrowia lipolytica (strain CLIB 122 / E 150) OX=284591 GN=FAS1 PE=3 SV=2	Botrytis_hyacinthi__gene-BHYA_0124g00270
Botrytis_hyacinthi__gene-BHYA_0159g00210	1	7221	hr_pks	100	Coleophoma_cylindrospora__gene1252	6.88e-237	52.7	hr_pks	sp|L7X8J4|CURS1_ASPTE	5.51e-174	27.8	sp|L7X8J4|CURS1_ASPTE Highly reducing polyketide synthase curS1 OS=Aspergillus terreus OX=33178 GN=curS1 PE=1 SV=1	Botrytis_hyacinthi__gene-BHYA_0159g00210
Botrytis_hyacinthi__gene-BHYA_0185g00150	1	5498	OTHER	100	BGC0001284__AKN45693.1	0	72.1	OTHER	sp|A0A0H4ADX3|PKS19_PHANO	0	65	sp|A0A0H4ADX3|PKS19_PHANO Non-reducing polyketide synthase PKS19 OS=Phaeosphaeria nodorum (strain SN15 / ATCC MYA-4574 / FGSC 10173) OX=321614 PE=2 SV=1	Botrytis_hyacinthi__gene-BHYA_0185g00150
Botrytis_hyacinthi__gene-BHYA_0207g00130	1	2269	hr_pks	100	BGC0001141__AIA58899.1	1.43e-110	49.3	hr_pks	sp|A0A068ABB7|BREF7_EUPBR	3.28e-103	49.3	sp|A0A068ABB7|BREF7_EUPBR Highly reducing polyketide synthase OS=Eupenicillium brefeldianum OX=1131482 GN=Bref-PKS PE=1 SV=1	Botrytis_hyacinthi__gene-BHYA_0207g00130
Botrytis_hyacinthi__gene-BHYA_0306g00050	1	6452	OTHER	100	BGC0002483__AUW31052.1	5.5e-244	46.5	OTHER	sp|A0A0R8YWJ7|MPAS_CLAUC	0	39.1	sp|A0A0R8YWJ7|MPAS_CLAUC Methylphloroacetophenone synthase OS=Cladonia uncialis OX=174080 GN=mpas PE=1 SV=2	Botrytis_hyacinthi__gene-BHYA_0306g00050
Botrytis_hyacinthi__gene-BHYA_0355g00020	1	6557	OTHER	100	BGC0000057__EAA59563.1	2.6e-271	51.9	OTHER	sp|Q5AUX1|ORSA_EMENI	0	46.1	sp|Q5AUX1|ORSA_EMENI Orsellinic acid synthase OS=Emericella nidulans (strain FGSC A4 / ATCC 38163 / CBS 112.46 / NRRL 194 / M139) OX=227321 GN=orsA PE=1 SV=1	Botrytis_hyacinthi__gene-BHYA_0355g00020
Botrytis_hyacinthi__gene-BHYA_0396g00030	1	1391	OTHER	100	BGC0001244__AIW00670.1	3.11e-26	32.9	OTHER	sp|Q8L3X9|KASM_ARATH	7.7e-105	63.6	sp|Q8L3X9|KASM_ARATH 3-oxoacyl-[acyl-carrier-protein] synthase, mitochondrial OS=Arabidopsis thaliana OX=3702 GN=KAS PE=1 SV=1	Botrytis_hyacinthi__gene-BHYA_0396g00030
Botrytis_paeoniae__gene-BPAE_0019g00460	1	6353	OUTLIER	*	None	None	None	None	sp|P34229|FAS1_YARLI	0	58.9	sp|P34229|FAS1_YARLI Fatty acid synthase subunit beta OS=Yarrowia lipolytica (strain CLIB 122 / E 150) OX=284591 GN=FAS1 PE=3 SV=2	Botrytis_paeoniae__gene-BPAE_0019g00460
Botrytis_paeoniae__gene-BPAE_0024g00220	1	7240	hr_pks	100	aspergillus_vadensis_cbs_113365_gca_003184925__gene___BO88DRAFT_454246	2.5e-62	44.7	hr_pks	sp|A0A3G1DJH7|SQTKS_PHOSM	6.46e-261	34.3	sp|A0A3G1DJH7|SQTKS_PHOSM Squalestatin tetraketide synthase OS=Phoma sp. (strain ATCC 20986 / MF5453) OX=1828523 GN=pks1 PE=1 SV=1	Botrytis_paeoniae__gene-BPAE_0024g00220
Botrytis_paeoniae__gene-BPAE_0024g00230	1	1180	hr_pks	99.9	aspergillus_calidoustus_gca_001511075__gene___ASPCAL07647	4.16e-95	54	hr_pks	sp|A0A4P8DJV2|DMXL2_CRYX8	7.41e-82	46.8	sp|A0A4P8DJV2|DMXL2_CRYX8 Highly reducing polyketide synthase dmxL2 OS=Cryptosporiopsis sp. (strain 8999) OX=2572248 GN=dmxL2 PE=3 SV=1	Botrytis_paeoniae__gene-BPAE_0024g00230
Botrytis_paeoniae__gene-BPAE_0035g00240	1	7961	hr_pks	100	Chlorociboria_aeruginascens__gene-B7494_g1069	3.34e-146	45.9	hr_pks	sp|Q8J0F5|MLCB_PENCI	4.05e-202	25.9	sp|Q8J0F5|MLCB_PENCI Compactin diketide synthase mlcB OS=Penicillium citrinum OX=5077 GN=mlcB PE=1 SV=1	Botrytis_paeoniae__gene-BPAE_0035g00240
Botrytis_paeoniae__gene-BPAE_0041g00680	1	8395	hr_pks	100	BGC0002515__KAF9708863.1	1.04e-72	32.4	hr_pks	sp|D7UQ44|SOL1_ALTSO	1.87e-138	24.1	sp|D7UQ44|SOL1_ALTSO Prosolanapyrone synthase OS=Alternaria solani OX=48100 GN=sol1 PE=1 SV=1	Botrytis_paeoniae__gene-BPAE_0041g00680
Botrytis_paeoniae__gene-BPAE_0059g00050	1	7229	hr_pks	100	Coleophoma_cylindrospora__gene1252	8.08e-178	53.5	hr_pks	sp|N4WHE3|PKS1_COCH4	1.52e-142	39.6	sp|N4WHE3|PKS1_COCH4 Reducing polyketide synthase PKS1 OS=Cochliobolus heterostrophus (strain C4 / ATCC 48331 / race T) OX=665024 GN=PKS1 PE=3 SV=1	Botrytis_paeoniae__gene-BPAE_0059g00050
Botrytis_paeoniae__gene-BPAE_0062g00360	1	8061	hr_pks	100	aspergillus_tubingensis_cbs_134_48_gca_001890745__gene___ASPTUDRAFT_927185	6.26e-136	35.1	hr_pks	sp|G4NEB1|NEC1_MAGO7	2.98e-240	30	sp|G4NEB1|NEC1_MAGO7 Highly reducing polyketide synthase NEC1 OS=Magnaporthe oryzae (strain 70-15 / ATCC MYA-4617 / FGSC 8958) OX=242507 GN=NEC1 PE=1 SV=1	Botrytis_paeoniae__gene-BPAE_0062g00360
Botrytis_paeoniae__gene-BPAE_0077g00200	1	5497	OTHER	100	BGC0001284__AKN45693.1	0	71.9	OTHER	sp|A0A0H4ADX3|PKS19_PHANO	0	66.6	sp|A0A0H4ADX3|PKS19_PHANO Non-reducing polyketide synthase PKS19 OS=Phaeosphaeria nodorum (strain SN15 / ATCC MYA-4574 / FGSC 10173) OX=321614 PE=2 SV=1	Botrytis_paeoniae__gene-BPAE_0077g00200
Botrytis_paeoniae__gene-BPAE_0084g00130	1	8558	OTHER	100	BGC0001360__CDM36726.1	1.11e-123	43.2	OTHER	sp|Q0CRQ5|5MOAS_ASPTN	9.62e-268	31	sp|Q0CRQ5|5MOAS_ASPTN 5-methylorsellinic acid synthase OS=Aspergillus terreus (strain NIH 2624 / FGSC A1156) OX=341663 GN=ATEG_03629 PE=1 SV=1	Botrytis_paeoniae__gene-BPAE_0084g00130
Botrytis_paeoniae__gene-BPAE_0086g00170	1	7478	hr_pks	100	BGC0001724__EPS29069.1	4.94e-276	51.2	hr_pks	sp|A0A7L8UVC9|FFSA_ASPFV	0	38.8	sp|A0A7L8UVC9|FFSA_ASPFV Polyketide synthase-nonribosomal peptide synthetase ffsA OS=Aspergillus flavipes OX=41900 GN=ffsA PE=3 SV=1	Botrytis_paeoniae__gene-BPAE_0086g00170
Botrytis_paeoniae__gene-BPAE_0091g00180	1	7968	OTHER	100	sp|A0A8F4SKJ7|ATR1_STEAL	0	58.6	OTHER	sp|A0A455R5P9|ASCC_ACREG	0	46.3	sp|A0A455R5P9|ASCC_ACREG Non-reducing polyketide synthase ascC OS=Acremonium egyptiacum OX=749675 GN=ascC PE=1 SV=1	Botrytis_paeoniae__gene-BPAE_0091g00180
Botrytis_paeoniae__gene-BPAE_0095g00050	1	1390	OTHER	100	BGC0001244__AIW00670.1	2.33e-26	33.3	OTHER	sp|Q8L3X9|KASM_ARATH	3.67e-117	58.5	sp|Q8L3X9|KASM_ARATH 3-oxoacyl-[acyl-carrier-protein] synthase, mitochondrial OS=Arabidopsis thaliana OX=3702 GN=KAS PE=1 SV=1	Botrytis_paeoniae__gene-BPAE_0095g00050
Botrytis_paeoniae__gene-BPAE_0097g00170	1	7918	OTHER	100	BGC0002483__AUW31052.1	8.6e-135	43.7	OTHER	sp|Q5AZ32|PKBA_EMENI	7.25e-315	37.6	sp|Q5AZ32|PKBA_EMENI Non-reducing polyketide synthase pkbA OS=Emericella nidulans (strain FGSC A4 / ATCC 38163 / CBS 112.46 / NRRL 194 / M139) OX=227321 GN=pkbA PE=1 SV=1	Botrytis_paeoniae__gene-BPAE_0097g00170
Botrytis_paeoniae__gene-BPAE_0097g00230	1	6758	OTHER	100	BGC0001258__AAN59953.1	4.86e-277	69.8	OTHER	sp|W3X7U2|PFMAE_PESFW	0	39.7	sp|W3X7U2|PFMAE_PESFW Conidial pigment polyketide synthase PfmaE OS=Pestalotiopsis fici (strain W106-1 / CGMCC3.15140) OX=1229662 GN=PfmaE PE=2 SV=1	Botrytis_paeoniae__gene-BPAE_0097g00230
Botrytis_paeoniae__gene-BPAE_0101g00310	1	8512	hr_pks	100	aspergillus_calidoustus_gca_001511075__gene___ASPCAL07647	2.07e-95	31.6	hr_pks	sp|Q86ZD9|SQTKS_PHOSC	3.68e-268	30.3	sp|Q86ZD9|SQTKS_PHOSC Squalestatin tetraketide synthase OS=Phoma sp. (strain C2932) OX=86977 GN=pks1 PE=1 SV=1	Botrytis_paeoniae__gene-BPAE_0101g00310
Botrytis_paeoniae__gene-BPAE_0103g00220	1	6762	OTHER	100	sp|P9WES9|LECAS_PSEFF	1.31e-154	60.3	OTHER	sp|E9KMQ2|GRA1_CLAGR	1.04e-177	28.7	sp|E9KMQ2|GRA1_CLAGR Non-reducing polyketide synthase PKS16 OS=Cladonia grayi OX=27339 GN=PKS16 PE=2 SV=1	Botrytis_paeoniae__gene-BPAE_0103g00220
Botrytis_paeoniae__gene-BPAE_0123g00170	1	5188	hr_pks	100	coniochaeta_sp._2t2.1__gene_5645	5.15e-20	35.1	hr_pks	sp|G4NEB1|NEC1_MAGO7	2.51e-101	27.9	sp|G4NEB1|NEC1_MAGO7 Highly reducing polyketide synthase NEC1 OS=Magnaporthe oryzae (strain 70-15 / ATCC MYA-4617 / FGSC 8958) OX=242507 GN=NEC1 PE=1 SV=1	Botrytis_paeoniae__gene-BPAE_0123g00170
Botrytis_paeoniae__gene-BPAE_0171g00170	1	6548	OTHER	100	sp|P9WET3|PREU8_PREIS	0	60.1	OTHER	sp|A7UMW1|PKS1_ELSFA	0	46.7	sp|A7UMW1|PKS1_ELSFA Non-reducing polyketide synthase 1 OS=Elsinoe fawcettii OX=40997 GN=PKS1 PE=2 SV=1	Botrytis_paeoniae__gene-BPAE_0171g00170
Botrytis_paeoniae__gene-BPAE_0200g00010	1	1348	OTHER	100	BGC0002212__ESK96613.1	1.26e-13	24.5	OTHER	sp|P71019|FABD_BACSU	2.77e-39	36.3	sp|P71019|FABD_BACSU Malonyl CoA-acyl carrier protein transacylase OS=Bacillus subtilis (strain 168) OX=224308 GN=fabD PE=3 SV=2	Botrytis_paeoniae__gene-BPAE_0200g00010
Botrytis_paeoniae__gene-BPAE_0298g00020	1	8023	OTHER	100	sp|P9WET2|PREU6_PREIS	0	56.1	OTHER	sp|A0A455R5P9|ASCC_ACREG	0	40.5	sp|A0A455R5P9|ASCC_ACREG Non-reducing polyketide synthase ascC OS=Acremonium egyptiacum OX=749675 GN=ascC PE=1 SV=1	Botrytis_paeoniae__gene-BPAE_0298g00020
Botrytis_paeoniae__gene-BPAE_0334g00010	1	7671	hr_pks	100	BGC0001141__AIA58899.1	3.81e-253	55.4	hr_pks	sp|A0A068ABB7|BREF7_EUPBR	0	38.9	sp|A0A068ABB7|BREF7_EUPBR Highly reducing polyketide synthase OS=Eupenicillium brefeldianum OX=1131482 GN=Bref-PKS PE=1 SV=1	Botrytis_paeoniae__gene-BPAE_0334g00010
Botrytis_paeoniae__gene-BPAE_0335g00010	1	8424	hr_pks	100	aspergillus_calidoustus_gca_001511075__gene___ASPCAL07647	9.89e-115	48.2	hr_pks	sp|Q5BA83|EASB_EMENI	6.9e-137	26.6	sp|Q5BA83|EASB_EMENI Highly reducing polyketide synthase easB OS=Emericella nidulans (strain FGSC A4 / ATCC 38163 / CBS 112.46 / NRRL 194 / M139) OX=227321 GN=easB PE=3 SV=1	Botrytis_paeoniae__gene-BPAE_0335g00010
Botrytis_paeoniae__gene-BPAE_0387g00010	1	5807	hr_pks	99.2	BGC0001141__AIA58899.1	9.61e-78	53.8	hr_pks	sp|A0A068ABB7|BREF7_EUPBR	0	42	sp|A0A068ABB7|BREF7_EUPBR Highly reducing polyketide synthase OS=Eupenicillium brefeldianum OX=1131482 GN=Bref-PKS PE=1 SV=1	Botrytis_paeoniae__gene-BPAE_0387g00010
Botrytis_porri__gene-BPOR_0003g00190	1	12126	hr_pks	100	BGC0001892__ATZ45182.1	4.35e-171	38.4	hr_pks	sp|A0A6J4B487|LUC5_FUSSX	0	33.3	sp|A0A6J4B487|LUC5_FUSSX Hybrid PKS-NRPS synthetase LUC5 OS=Fusarium sp. OX=29916 GN=LUC5 PE=3 SV=1	Botrytis_porri__gene-BPOR_0003g00190
Botrytis_porri__gene-BPOR_0011g00280	1	8197	hr_pks	100	aspergillus_tubingensis_cbs_134_48_gca_001890745__gene___ASPTUDRAFT_927185	1.13e-133	34.2	hr_pks	sp|G4NEB1|NEC1_MAGO7	4.83e-221	29.6	sp|G4NEB1|NEC1_MAGO7 Highly reducing polyketide synthase NEC1 OS=Magnaporthe oryzae (strain 70-15 / ATCC MYA-4617 / FGSC 8958) OX=242507 GN=NEC1 PE=1 SV=1	Botrytis_porri__gene-BPOR_0011g00280
Botrytis_porri__gene-BPOR_0033g00120	1	7931	OTHER	100	BGC0002483__AUW31052.1	9.86e-134	44	OTHER	sp|Q5AZ32|PKBA_EMENI	0	35.7	sp|Q5AZ32|PKBA_EMENI Non-reducing polyketide synthase pkbA OS=Emericella nidulans (strain FGSC A4 / ATCC 38163 / CBS 112.46 / NRRL 194 / M139) OX=227321 GN=pkbA PE=1 SV=1	Botrytis_porri__gene-BPOR_0033g00120
Botrytis_porri__gene-BPOR_0033g00180	1	6664	OTHER	100	BGC0001258__AAN59953.1	1.58e-274	68.2	OTHER	sp|W3X7U2|PFMAE_PESFW	0	39.5	sp|W3X7U2|PFMAE_PESFW Conidial pigment polyketide synthase PfmaE OS=Pestalotiopsis fici (strain W106-1 / CGMCC3.15140) OX=1229662 GN=PfmaE PE=2 SV=1	Botrytis_porri__gene-BPOR_0033g00180
Botrytis_porri__gene-BPOR_0073g00130	1	7965	OTHER	100	sp|A0A8F4SKJ7|ATR1_STEAL	0	58.5	OTHER	sp|A0A455R5P9|ASCC_ACREG	0	42.8	sp|A0A455R5P9|ASCC_ACREG Non-reducing polyketide synthase ascC OS=Acremonium egyptiacum OX=749675 GN=ascC PE=1 SV=1	Botrytis_porri__gene-BPOR_0073g00130
Botrytis_porri__gene-BPOR_0120g00140	1	6543	OTHER	100	sp|P9WET3|PREU8_PREIS	0	59.5	OTHER	sp|A7UMW1|PKS1_ELSFA	0	46.2	sp|A7UMW1|PKS1_ELSFA Non-reducing polyketide synthase 1 OS=Elsinoe fawcettii OX=40997 GN=PKS1 PE=2 SV=1	Botrytis_porri__gene-BPOR_0120g00140
Botrytis_porri__gene-BPOR_0121g00070	1	7563	hr_pks	100	BGC0001892__ATZ45182.1	0	98.5	hr_pks	sp|B1GVX7|BOA6_BOTFB	0	98.9	sp|B1GVX7|BOA6_BOTFB Reducing polyketide synthase BOA6 OS=Botryotinia fuckeliana (strain B05.10) OX=332648 GN=BOA6 PE=2 SV=1	Botrytis_porri__gene-BPOR_0121g00070
Botrytis_porri__gene-BPOR_0121g00100	1	7398	hr_pks	100	BGC0001892__ATZ45185.1	0	72.5	hr_pks	sp|G0LET7|BOA9_BOTFB	0	73.3	sp|G0LET7|BOA9_BOTFB Reducing polyketide synthase BOA9 OS=Botryotinia fuckeliana (strain B05.10) OX=332648 GN=BOA9 PE=2 SV=1	Botrytis_porri__gene-BPOR_0121g00100
Botrytis_porri__gene-BPOR_0137g00080	1	6353	OUTLIER	*	None	None	None	None	sp|P34229|FAS1_YARLI	0	58.8	sp|P34229|FAS1_YARLI Fatty acid synthase subunit beta OS=Yarrowia lipolytica (strain CLIB 122 / E 150) OX=284591 GN=FAS1 PE=3 SV=2	Botrytis_porri__gene-BPOR_0137g00080
Botrytis_porri__gene-BPOR_0170g00040	1	2335	hr_pks	100	BGC0002525__BBU37368.1	1.1e-74	64.1	hr_pks	sp|A0A6S5ZY48|G433_FUSSX	3.1e-90	53.3	sp|A0A6S5ZY48|G433_FUSSX Highly reducing polyketide synthase g433 OS=Fusarium sp. OX=29916 GN=g433 PE=2 SV=1	Botrytis_porri__gene-BPOR_0170g00040
Botrytis_porri__gene-BPOR_0174g00050	1	5499	OTHER	100	BGC0001284__AKN45693.1	0	71.1	OTHER	sp|A0A0H4ADX3|PKS19_PHANO	0	66.4	sp|A0A0H4ADX3|PKS19_PHANO Non-reducing polyketide synthase PKS19 OS=Phaeosphaeria nodorum (strain SN15 / ATCC MYA-4574 / FGSC 10173) OX=321614 PE=2 SV=1	Botrytis_porri__gene-BPOR_0174g00050
Botrytis_porri__gene-BPOR_0239g00130	1	1348	OTHER	100	BGC0002212__ESK96613.1	6.8e-13	23.9	OTHER	sp|P71019|FABD_BACSU	3.8e-40	36.8	sp|P71019|FABD_BACSU Malonyl CoA-acyl carrier protein transacylase OS=Bacillus subtilis (strain 168) OX=224308 GN=fabD PE=3 SV=2	Botrytis_porri__gene-BPOR_0239g00130
Botrytis_porri__gene-BPOR_0254g00030	1	7224	hr_pks	100	Coleophoma_cylindrospora__gene1252	5.44e-221	54.1	hr_pks	sp|L7X8J4|CURS1_ASPTE	2.92e-171	27.9	sp|L7X8J4|CURS1_ASPTE Highly reducing polyketide synthase curS1 OS=Aspergillus terreus OX=33178 GN=curS1 PE=1 SV=1	Botrytis_porri__gene-BPOR_0254g00030
Botrytis_porri__gene-BPOR_0334g00020	1	7812	hr_pks	100	BGC0002729__EAA36364.1	4.36e-236	45.8	hr_pks	sp|Q7SHI6|SRDA_NEUCR	0	38.9	sp|Q7SHI6|SRDA_NEUCR Highly reducing polyketide synthase srdA OS=Neurospora crassa (strain ATCC 24698 / 74-OR23-1A / CBS 708.71 / DSM 1257 / FGSC 987) OX=367110 GN=srdA PE=2 SV=1	Botrytis_porri__gene-BPOR_0334g00020
Botrytis_porri__gene-BPOR_0420g00020	1	3556	hr_pks	100	ilyonectria_sp.__estExt_Genewise1.C_7_t50272	3.42e-21	45.2	macrolactone_ancestral_clade	sp|Q9HE13|YI32_SCHPO	1.71e-13	36.4	sp|Q9HE13|YI32_SCHPO Uncharacterized MFS-type transporter C1399.02 OS=Schizosaccharomyces pombe (strain 972 / ATCC 24843) OX=284812 GN=SPAC1399.02 PE=3 SV=1	Botrytis_porri__gene-BPOR_0420g00020
Botrytis_porri__gene-BPOR_1072g00020	1	1390	OTHER	100	BGC0001244__AIW00670.1	5.43e-27	33.8	OTHER	sp|Q8L3X9|KASM_ARATH	4.15e-116	57.8	sp|Q8L3X9|KASM_ARATH 3-oxoacyl-[acyl-carrier-protein] synthase, mitochondrial OS=Arabidopsis thaliana OX=3702 GN=KAS PE=1 SV=1	Botrytis_porri__gene-BPOR_1072g00020
Botrytis_tulipae__gene-BTUL_0001g00530	1	13080	hr_pks	100	BGC0000983__EAW09117.1	1.73e-164	62.6	hr_pks	sp|A0A0G0AID6|THNA_TRIHA	2.2e-267	33.7	sp|A0A0G0AID6|THNA_TRIHA Hybrid PKS-NRPS synthetase thnA OS=Trichoderma harzianum OX=5544 GN=thnA PE=1 SV=1	Botrytis_tulipae__gene-BTUL_0001g00530
Botrytis_tulipae__gene-BTUL_0001g01140	1	7524	hr_pks	100	BGC0002525__BBU37368.1	1.27e-243	46.3	hr_pks	sp|A0A6S5ZY48|G433_FUSSX	0	32.7	sp|A0A6S5ZY48|G433_FUSSX Highly reducing polyketide synthase g433 OS=Fusarium sp. OX=29916 GN=g433 PE=2 SV=1	Botrytis_tulipae__gene-BTUL_0001g01140
Botrytis_tulipae__gene-BTUL_0004g00640	1	7472	hr_pks	100	BGC0001724__EPS29069.1	4.58e-277	51.3	hr_pks	sp|A0A7L8UVC9|FFSA_ASPFV	0	38.6	sp|A0A7L8UVC9|FFSA_ASPFV Polyketide synthase-nonribosomal peptide synthetase ffsA OS=Aspergillus flavipes OX=41900 GN=ffsA PE=3 SV=1	Botrytis_tulipae__gene-BTUL_0004g00640
Botrytis_tulipae__gene-BTUL_0011g00860	1	8201	hr_pks	100	aspergillus_calidoustus_gca_001511075__gene___ASPCAL07647	2.34e-93	52.5	hr_pks	sp|Q86ZD9|SQTKS_PHOSC	4.76e-274	33.1	sp|Q86ZD9|SQTKS_PHOSC Squalestatin tetraketide synthase OS=Phoma sp. (strain C2932) OX=86977 GN=pks1 PE=1 SV=1	Botrytis_tulipae__gene-BTUL_0011g00860
Botrytis_tulipae__gene-BTUL_0018g00200	1	752	macrolactone_ancestral_clade	97.9	westerdykella_ornata_cbs_379.55__MIX8527_328471_62	4.59e-76	77.6	macrolactone_ancestral_clade	sp|B3FWT3|HPM8_HYPSB	1.46e-69	75	sp|B3FWT3|HPM8_HYPSB Reducing polyketide synthase hmp8 OS=Hypomyces subiculosus OX=193393 GN=hpm8 PE=1 SV=1	Botrytis_tulipae__gene-BTUL_0018g00200
Botrytis_tulipae__gene-BTUL_0035g00170	1	7659	hr_pks	100	BGC0001141__AIA58899.1	1.43e-160	51.3	hr_pks	sp|A0A068ABB7|BREF7_EUPBR	0	42.9	sp|A0A068ABB7|BREF7_EUPBR Highly reducing polyketide synthase OS=Eupenicillium brefeldianum OX=1131482 GN=Bref-PKS PE=1 SV=1	Botrytis_tulipae__gene-BTUL_0035g00170
Botrytis_tulipae__gene-BTUL_0044g00430	1	7222	hr_pks	100	Coleophoma_cylindrospora__gene1252	0	60.2	hr_pks	sp|N4WHE3|PKS1_COCH4	7.4e-224	34.1	sp|N4WHE3|PKS1_COCH4 Reducing polyketide synthase PKS1 OS=Cochliobolus heterostrophus (strain C4 / ATCC 48331 / race T) OX=665024 GN=PKS1 PE=3 SV=1	Botrytis_tulipae__gene-BTUL_0044g00430
Botrytis_tulipae__gene-BTUL_0071g00130	1	7969	OTHER	100	sp|A0A8F4SKJ7|ATR1_STEAL	0	58.9	OTHER	sp|A0A455R5P9|ASCC_ACREG	0	45.9	sp|A0A455R5P9|ASCC_ACREG Non-reducing polyketide synthase ascC OS=Acremonium egyptiacum OX=749675 GN=ascC PE=1 SV=1	Botrytis_tulipae__gene-BTUL_0071g00130
Botrytis_tulipae__gene-BTUL_0085g00420	1	6548	OTHER	100	sp|P9WET3|PREU8_PREIS	0	60.2	OTHER	sp|A7UMW1|PKS1_ELSFA	0	46.9	sp|A7UMW1|PKS1_ELSFA Non-reducing polyketide synthase 1 OS=Elsinoe fawcettii OX=40997 GN=PKS1 PE=2 SV=1	Botrytis_tulipae__gene-BTUL_0085g00420
Botrytis_tulipae__gene-BTUL_0098g00320	1	7755	OTHER	100	BGC0002483__AUW31052.1	1.19e-129	42.6	OTHER	sp|Q5AZ32|PKBA_EMENI	0	32.7	sp|Q5AZ32|PKBA_EMENI Non-reducing polyketide synthase pkbA OS=Emericella nidulans (strain FGSC A4 / ATCC 38163 / CBS 112.46 / NRRL 194 / M139) OX=227321 GN=pkbA PE=1 SV=1	Botrytis_tulipae__gene-BTUL_0098g00320
Botrytis_tulipae__gene-BTUL_0098g00380	1	6758	OTHER	100	BGC0001258__AAN59953.1	1.76e-277	69.9	OTHER	sp|W3X7U2|PFMAE_PESFW	0	47.3	sp|W3X7U2|PFMAE_PESFW Conidial pigment polyketide synthase PfmaE OS=Pestalotiopsis fici (strain W106-1 / CGMCC3.15140) OX=1229662 GN=PfmaE PE=2 SV=1	Botrytis_tulipae__gene-BTUL_0098g00380
Botrytis_tulipae__gene-BTUL_0112g00090	1	6353	OUTLIER	*	None	None	None	None	sp|P34229|FAS1_YARLI	0	58.7	sp|P34229|FAS1_YARLI Fatty acid synthase subunit beta OS=Yarrowia lipolytica (strain CLIB 122 / E 150) OX=284591 GN=FAS1 PE=3 SV=2	Botrytis_tulipae__gene-BTUL_0112g00090
Botrytis_tulipae__gene-BTUL_0132g00250	1	755	OTHER	100	BGC0001118__EAL84397.1	3.42e-101	65.8	OTHER	sp|Q4W944|ENCA_ASPFU	3.22e-95	65.8	sp|Q4W944|ENCA_ASPFU Atrochrysone carboxylic acid synthase OS=Neosartorya fumigata (strain ATCC MYA-4609 / Af293 / CBS 101355 / FGSC A1100) OX=330879 GN=encA PE=1 SV=1	Botrytis_tulipae__gene-BTUL_0132g00250
Botrytis_tulipae__gene-BTUL_0140g00060	1	925	hr_pks	100	aspergillus_indologenus_cbs_114_80_gca_003184685__gene___BP00DRAFT_195398	7.13e-39	43.3	hr_pks	sp|E5A7D9|PKS5_LEPMJ	4.01e-36	60.4	sp|E5A7D9|PKS5_LEPMJ Highly reducing polyketide synthase pks5 OS=Leptosphaeria maculans (strain JN3 / isolate v23.1.3 / race Av1-4-5-6-7-8) OX=985895 GN=pks5 PE=2 SV=1	Botrytis_tulipae__gene-BTUL_0140g00060
Botrytis_tulipae__gene-BTUL_0140g00070	1	249	hr_pks	100	Colletotrichum_scovillei__gene-HER10_EVM0001067	4.88e-28	64.6	hr_pks	sp|E5A7D9|PKS5_LEPMJ	4.05e-25	62.7	sp|E5A7D9|PKS5_LEPMJ Highly reducing polyketide synthase pks5 OS=Leptosphaeria maculans (strain JN3 / isolate v23.1.3 / race Av1-4-5-6-7-8) OX=985895 GN=pks5 PE=2 SV=1	Botrytis_tulipae__gene-BTUL_0140g00070
Botrytis_tulipae__gene-BTUL_0146g00300	1	6557	OTHER	100	BGC0000057__EAA59563.1	2.76e-270	50.9	OTHER	sp|Q5AUX1|ORSA_EMENI	0	45.9	sp|Q5AUX1|ORSA_EMENI Orsellinic acid synthase OS=Emericella nidulans (strain FGSC A4 / ATCC 38163 / CBS 112.46 / NRRL 194 / M139) OX=227321 GN=orsA PE=1 SV=1	Botrytis_tulipae__gene-BTUL_0146g00300
Botrytis_tulipae__gene-BTUL_0179g00050	1	8040	hr_pks	100	aspergillus_tubingensis_cbs_134_48_gca_001890745__gene___ASPTUDRAFT_927185	3.15e-127	46.6	hr_pks	sp|G4NEB1|NEC1_MAGO7	1.32e-215	29.3	sp|G4NEB1|NEC1_MAGO7 Highly reducing polyketide synthase NEC1 OS=Magnaporthe oryzae (strain 70-15 / ATCC MYA-4617 / FGSC 8958) OX=242507 GN=NEC1 PE=1 SV=1	Botrytis_tulipae__gene-BTUL_0179g00050
Botrytis_tulipae__gene-BTUL_0198g00060	1	1390	OTHER	100	BGC0001244__AIW00670.1	1.74e-26	32.9	OTHER	sp|Q8L3X9|KASM_ARATH	1.84e-117	58.8	sp|Q8L3X9|KASM_ARATH 3-oxoacyl-[acyl-carrier-protein] synthase, mitochondrial OS=Arabidopsis thaliana OX=3702 GN=KAS PE=1 SV=1	Botrytis_tulipae__gene-BTUL_0198g00060
Botrytis_tulipae__gene-BTUL_0200g00170	1	5499	OTHER	100	BGC0001284__AKN45693.1	0	72.1	OTHER	sp|A0A0H4ADX3|PKS19_PHANO	0	66.8	sp|A0A0H4ADX3|PKS19_PHANO Non-reducing polyketide synthase PKS19 OS=Phaeosphaeria nodorum (strain SN15 / ATCC MYA-4574 / FGSC 10173) OX=321614 PE=2 SV=1	Botrytis_tulipae__gene-BTUL_0200g00170
Botrytis_tulipae__gene-BTUL_0247g00090	1	6449	OTHER	100	BGC0002483__AUW31052.1	2.52e-246	47.4	OTHER	sp|A0A0R8YWJ7|MPAS_CLAUC	0	39.6	sp|A0A0R8YWJ7|MPAS_CLAUC Methylphloroacetophenone synthase OS=Cladonia uncialis OX=174080 GN=mpas PE=1 SV=2	Botrytis_tulipae__gene-BTUL_0247g00090
Botrytis_tulipae__gene-BTUL_0255g00020	1	4731	OTHER	100	BGC0000030__CCT67991.1	0	92.5	OTHER	sp|S0DZM7|BIK1_GIBF5	0	62.2	sp|S0DZM7|BIK1_GIBF5 Bikaverin polyketide synthase bik1 OS=Gibberella fujikuroi (strain CBS 195.34 / IMI 58289 / NRRL A-6831) OX=1279085 GN=bik1 PE=1 SV=1	Botrytis_tulipae__gene-BTUL_0255g00020
Botrytis_tulipae__gene-BTUL_0319g00070	1	1348	OTHER	100	BGC0002212__ESK96613.1	5.14e-13	24.2	OTHER	sp|P71019|FABD_BACSU	1.43e-39	36.5	sp|P71019|FABD_BACSU Malonyl CoA-acyl carrier protein transacylase OS=Bacillus subtilis (strain 168) OX=224308 GN=fabD PE=3 SV=2	Botrytis_tulipae__gene-BTUL_0319g00070
Botrytis_tulipae__gene-BTUL_0345g00020	1	243	hr_pks	100	sp|G0LET7|BOA9_BOTFB	3.27e-49	92.4	hr_pks	sp|G0LET7|BOA9_BOTFB	1.28e-46	92.4	sp|G0LET7|BOA9_BOTFB Reducing polyketide synthase BOA9 OS=Botryotinia fuckeliana (strain B05.10) OX=332648 GN=BOA9 PE=2 SV=1	Botrytis_tulipae__gene-BTUL_0345g00020
Botrytis_tulipae__gene-BTUL_0379g00050	1	332	hr_pks	100	BGC0002180__CBF82304.1	4.56e-14	45	hr_pks	sp|C8VJR7|ALNA_EMENI	1.52e-11	45	sp|C8VJR7|ALNA_EMENI Highly reducing polyketide synthase alnA OS=Emericella nidulans (strain FGSC A4 / ATCC 38163 / CBS 112.46 / NRRL 194 / M139) OX=227321 GN=alnA PE=1 SV=1	Botrytis_tulipae__gene-BTUL_0379g00050
Brettanomyces_bruxellensis__gene-BRETT_003965	1	1323	OTHER	100	BGC0002483__AUW31052.1	3.7e-29	26.1	OTHER	sp|Q9D404|OXSM_MOUSE	9.91e-138	50.8	sp|Q9D404|OXSM_MOUSE 3-oxoacyl-[acyl-carrier-protein] synthase, mitochondrial OS=Mus musculus OX=10090 GN=Oxsm PE=1 SV=1	Brettanomyces_bruxellensis__gene-BRETT_003965
Brettanomyces_bruxellensis__gene-BRETT_004505	1	6195	OUTLIER	*	None	None	None	None	sp|P34731|FAS1_CANAX	0	62.3	sp|P34731|FAS1_CANAX Fatty acid synthase subunit beta OS=Candida albicans OX=5476 GN=FAS1 PE=1 SV=1	Brettanomyces_bruxellensis__gene-BRETT_004505
Brettanomyces_bruxellensis__gene-BRETT_004531	1	6195	OUTLIER	*	None	None	None	None	sp|P34731|FAS1_CANAX	0	62.3	sp|P34731|FAS1_CANAX Fatty acid synthase subunit beta OS=Candida albicans OX=5476 GN=FAS1 PE=1 SV=1	Brettanomyces_bruxellensis__gene-BRETT_004531
Candida_albicans__gene2924	1	1326	OTHER	100	meliniomyces_variabilis_f_gca_002865655__gene___L207DRAFT_498440	2.33e-27	30.8	hr_pks	sp|O94297|OXSM_SCHPO	3.84e-132	47.5	sp|O94297|OXSM_SCHPO Putative 3-oxoacyl-[acyl-carrier-protein] synthase, mitochondrial OS=Schizosaccharomyces pombe (strain 972 / ATCC 24843) OX=284812 GN=SPBC887.13c PE=3 SV=1	Candida_albicans__gene2924
Candida_albicans__gene3908	1	6114	OUTLIER	*	None	None	None	None	sp|P34731|FAS1_CANAX	0	99.8	sp|P34731|FAS1_CANAX Fatty acid synthase subunit beta OS=Candida albicans OX=5476 GN=FAS1 PE=1 SV=1	Candida_albicans__gene3908
Candida_albicans__gene5781	1	1026	OTHER	100	BGC0002594__ESU09199.1	2.89e-16	29.7	OTHER	sp|P0AAJ0|FABD_ECOL6	8.33e-31	30.3	sp|P0AAJ0|FABD_ECOL6 Malonyl CoA-acyl carrier protein transacylase OS=Escherichia coli O6:H1 (strain CFT073 / ATCC 700928 / UPEC) OX=199310 GN=fabD PE=3 SV=2	Candida_albicans__gene5781
Candida_haemuloni__gene-CXQ85_000485	1	984	OTHER	100	BGC0002244__KAF7526531.1	9.49e-18	29.9	OTHER	sp|Q9R9J2|FENF_BACIU	6.61e-26	30.6	sp|Q9R9J2|FENF_BACIU Malonyl CoA-acyl carrier protein transacylase OS=Bacillus subtilis OX=1423 GN=fenF PE=1 SV=1	[Candida]_haemuloni__gene-CXQ85_000485
Candida_haemuloni__gene-CXQ85_002943	1	6188	OUTLIER	*	None	None	None	None	sp|P34731|FAS1_CANAX	0	72.2	sp|P34731|FAS1_CANAX Fatty acid synthase subunit beta OS=Candida albicans OX=5476 GN=FAS1 PE=1 SV=1	[Candida]_haemuloni__gene-CXQ85_002943
Candida_haemuloni__gene-CXQ85_005242	1	1272	OTHER	100	sp|P9WQE6|PPSA_MYCTO	4.49e-31	29.1	OTHER	sp|O94297|OXSM_SCHPO	2.15e-129	48.6	sp|O94297|OXSM_SCHPO Putative 3-oxoacyl-[acyl-carrier-protein] synthase, mitochondrial OS=Schizosaccharomyces pombe (strain 972 / ATCC 24843) OX=284812 GN=SPBC887.13c PE=3 SV=1	[Candida]_haemuloni__gene-CXQ85_005242
Candida_pseudohaemulonii__gene-C7M61_002585	1	8938	OUTLIER	*	None	None	None	None	sp|P34731|FAS1_CANAX	0	75.2	sp|P34731|FAS1_CANAX Fatty acid synthase subunit beta OS=Candida albicans OX=5476 GN=FAS1 PE=1 SV=1	[Candida]_pseudohaemulonii__gene-C7M61_002585
Candida_pseudohaemulonii__gene-C7M61_003990	1	1266	OTHER	100	sp|B8NYX0|FLUP_ASPFN	1.42e-30	27	OTHER	sp|O94297|OXSM_SCHPO	3.7e-127	47.2	sp|O94297|OXSM_SCHPO Putative 3-oxoacyl-[acyl-carrier-protein] synthase, mitochondrial OS=Schizosaccharomyces pombe (strain 972 / ATCC 24843) OX=284812 GN=SPBC887.13c PE=3 SV=1	[Candida]_pseudohaemulonii__gene-C7M61_003990
Candida_pseudohaemulonii__gene-C7M61_005092	1	972	OTHER	100	BGC0002237__BAE62229.1	7.71e-15	31.3	OTHER	sp|P43712|FABD_HAEIN	2.1e-23	28.2	sp|P43712|FABD_HAEIN Malonyl CoA-acyl carrier protein transacylase OS=Haemophilus influenzae (strain ATCC 51907 / DSM 11121 / KW20 / Rd) OX=71421 GN=fabD PE=3 SV=1	[Candida]_pseudohaemulonii__gene-C7M61_005092
Caulochytrium_protostelioides__gene6091	1	981	OUTLIER	*	None	None	None	None	sp|P71019|FABD_BACSU	1.03e-38	35.4	sp|P71019|FABD_BACSU Malonyl CoA-acyl carrier protein transacylase OS=Bacillus subtilis (strain 168) OX=224308 GN=fabD PE=3 SV=2	Caulochytrium_protostelioides__gene6091
Cenococcum_geophilum__gene11104	1	6686	OTHER	100	BGC0002215__ERF77221.1	0	59	OTHER	sp|A0A142C799|PHNA_PENHR	0	48.5	sp|A0A142C799|PHNA_PENHR Non-reducing polyketide synthase phnA OS=Penicillium herquei OX=69774 GN=phnA PE=1 SV=1	Cenococcum_geophilum__gene11104
Cenococcum_geophilum__gene14138	1	8266	hr_pks	99.8	BGC0002525__BBU37368.1	1.78e-104	35.3	hr_pks	sp|S3D9F1|GLOL_GLAL2	0	33.2	sp|S3D9F1|GLOL_GLAL2 Highly reducing polyketide synthase gloL OS=Glarea lozoyensis (strain ATCC 20868 / MF5171) OX=1116229 GN=gloL PE=1 SV=1	Cenococcum_geophilum__gene14138
Cenococcum_geophilum__gene14702	1	1860	OTHER	100	BGC0001244__AIW00670.1	3.32e-13	31.7	OTHER	sp|Q9D404|OXSM_MOUSE	6.27e-36	51.3	sp|Q9D404|OXSM_MOUSE 3-oxoacyl-[acyl-carrier-protein] synthase, mitochondrial OS=Mus musculus OX=10090 GN=Oxsm PE=1 SV=1	Cenococcum_geophilum__gene14702
Cenococcum_geophilum__gene1626	1	12503	hr_pks	100	BGC0002204__QOG08944.1	0	78.4	hr_pks	sp|A0A7L8UVC9|FFSA_ASPFV	0	74.8	sp|A0A7L8UVC9|FFSA_ASPFV Polyketide synthase-nonribosomal peptide synthetase ffsA OS=Aspergillus flavipes OX=41900 GN=ffsA PE=3 SV=1	Cenococcum_geophilum__gene1626
Cenococcum_geophilum__gene1634	1	8797	hr_pks	100	aspergillus_vadensis_cbs_113365_gca_003184925__gene___BO88DRAFT_454246	3.57e-120	32.4	hr_pks	sp|A0A098D8A0|ZEA2_GIBZE	1.11e-115	36.4	sp|A0A098D8A0|ZEA2_GIBZE Highly reducing polyketide synthase ZEA2 OS=Gibberella zeae (strain ATCC MYA-4620 / CBS 123657 / FGSC 9075 / NRRL 31084 / PH-1) OX=229533 GN=ZEA2 PE=2 SV=1	Cenococcum_geophilum__gene1634
Cenococcum_geophilum__gene1951	1	7342	OTHER	100	sp|P9WET3|PREU8_PREIS	0	85.1	OTHER	sp|F9XMW3|PKS1_ZYMTI	0	66.1	sp|F9XMW3|PKS1_ZYMTI Non-reducing polyketide synthase PKS1 OS=Zymoseptoria tritici (strain CBS 115943 / IPO323) OX=336722 GN=PKS1 PE=3 SV=1	Cenococcum_geophilum__gene1951
Cenococcum_geophilum__gene2083	1	2907	OUTLIER	*	None	None	None	None	sp|P34731|FAS1_CANAX	4.52e-112	39.6	sp|P34731|FAS1_CANAX Fatty acid synthase subunit beta OS=Candida albicans OX=5476 GN=FAS1 PE=1 SV=1	Cenococcum_geophilum__gene2083
Cenococcum_geophilum__gene2666	1	2535	hr_pks	100	BGC0002729__EAA36364.1	1.62e-116	38.4	hr_pks	sp|Q7SHI6|SRDA_NEUCR	2.07e-108	38.4	sp|Q7SHI6|SRDA_NEUCR Highly reducing polyketide synthase srdA OS=Neurospora crassa (strain ATCC 24698 / 74-OR23-1A / CBS 708.71 / DSM 1257 / FGSC 987) OX=367110 GN=srdA PE=2 SV=1	Cenococcum_geophilum__gene2666
Cenococcum_geophilum__gene3365	1	6708	OTHER	100	sp|P9WET9|PKS24_BYSSP	0	66.4	OTHER	sp|A0A1L9UCG2|ALBA_ASPBC	0	54.7	sp|A0A1L9UCG2|ALBA_ASPBC Non-reducing polyketide synthase albA OS=Aspergillus brasiliensis (strain CBS 101740 / IMI 381727 / IBT 21946) OX=767769 GN=albA PE=3 SV=1	Cenococcum_geophilum__gene3365
Cenococcum_geophilum__gene5079	1	6941	OUTLIER	*	None	None	None	None	sp|P34229|FAS1_YARLI	0	59.2	sp|P34229|FAS1_YARLI Fatty acid synthase subunit beta OS=Yarrowia lipolytica (strain CLIB 122 / E 150) OX=284591 GN=FAS1 PE=3 SV=2	Cenococcum_geophilum__gene5079
Cenococcum_geophilum__gene54	1	8254	OTHER	100	BGC0001793__AQV04224.1	0	62	OTHER	sp|E9F8M3|SWNK_METRA	0	57.2	sp|E9F8M3|SWNK_METRA PKS-NRPS hybrid synthetase swnK OS=Metarhizium robertsii (strain ARSEF 23 / ATCC MYA-3075) OX=655844 GN=swnK PE=1 SV=1	Cenococcum_geophilum__gene54
Cenococcum_geophilum__gene7238	1	1187	OTHER	100	BGC0002212__ESK96613.1	1.99e-12	25.3	OTHER	sp|P73242|FABD_SYNY3	7.97e-22	28.5	sp|P73242|FABD_SYNY3 Malonyl CoA-acyl carrier protein transacylase OS=Synechocystis sp. (strain PCC 6803 / Kazusa) OX=1111708 GN=fabD PE=1 SV=1	Cenococcum_geophilum__gene7238
Cenococcum_geophilum__gene7557	1	6794	OTHER	100	BGC0002483__AUW31052.1	4.15e-260	49.5	OTHER	sp|Q0CRQ5|5MOAS_ASPTN	0	40.4	sp|Q0CRQ5|5MOAS_ASPTN 5-methylorsellinic acid synthase OS=Aspergillus terreus (strain NIH 2624 / FGSC A1156) OX=341663 GN=ATEG_03629 PE=1 SV=1	Cenococcum_geophilum__gene7557
Cenococcum_geophilum__gene7584	1	7820	hr_pks	100	BGC0002525__BBU37368.1	8.15e-214	52.3	hr_pks	sp|A0A6S5ZY48|G433_FUSSX	0	43.5	sp|A0A6S5ZY48|G433_FUSSX Highly reducing polyketide synthase g433 OS=Fusarium sp. OX=29916 GN=g433 PE=2 SV=1	Cenococcum_geophilum__gene7584
Cenococcum_geophilum__gene9105	1	7943	hr_pks	100	BGC0002525__BBU37368.1	4.46e-201	47	hr_pks	sp|A0A6S5ZY48|G433_FUSSX	0	39	sp|A0A6S5ZY48|G433_FUSSX Highly reducing polyketide synthase g433 OS=Fusarium sp. OX=29916 GN=g433 PE=2 SV=1	Cenococcum_geophilum__gene9105
Cenococcum_geophilum__gene9356__renamed0047	1	8500	hr_pks	100	Cenococcum_geophilum__gene9356	2.93e-319	95.6	hr_pks	sp|Q5KTM9|ALT5_ALTSO	2.39e-179	27.9	sp|Q5KTM9|ALT5_ALTSO Highly reducing polyketide synthase alt5 OS=Alternaria solani OX=48100 GN=alt5 PE=1 SV=1	Cenococcum_geophilum__gene9356
Ceratocystis_fimbriata__gene-CFIMG_001349RA	1	6306	OUTLIER	*	None	None	None	None	sp|P34229|FAS1_YARLI	0	58.4	sp|P34229|FAS1_YARLI Fatty acid synthase subunit beta OS=Yarrowia lipolytica (strain CLIB 122 / E 150) OX=284591 GN=FAS1 PE=3 SV=2	Ceratocystis_fimbriata__gene-CFIMG_001349RA
Ceratocystis_fimbriata__gene-CFIMG_003656RA	1	6825	OTHER	100	BGC0002161__ETS82099.1	0	77.4	OTHER	sp|W3X7U2|PFMAE_PESFW	0	61	sp|W3X7U2|PFMAE_PESFW Conidial pigment polyketide synthase PfmaE OS=Pestalotiopsis fici (strain W106-1 / CGMCC3.15140) OX=1229662 GN=PfmaE PE=2 SV=1	Ceratocystis_fimbriata__gene-CFIMG_003656RA
Ceratocystis_fimbriata__gene-CFIMG_005862RA	1	1402	OTHER	100	BGC0002212__ESK96613.1	3.65e-15	27.5	OTHER	sp|P71019|FABD_BACSU	1.63e-30	31.1	sp|P71019|FABD_BACSU Malonyl CoA-acyl carrier protein transacylase OS=Bacillus subtilis (strain 168) OX=224308 GN=fabD PE=3 SV=2	Ceratocystis_fimbriata__gene-CFIMG_005862RA
Ceratocystis_fimbriata__gene-CFIMG_006861RA	1	7705	hr_pks	100	trichoderma_longibrachiatum_atcc_18648_gca_003025155__gene___M440DRAFT_1102985	4.13e-143	39.3	hr_pks	sp|W7MT31|FUB1_GIBM7	7.62e-188	27.4	sp|W7MT31|FUB1_GIBM7 Reducing polyketide synthase FUB1 OS=Gibberella moniliformis (strain M3125 / FGSC 7600) OX=334819 GN=FUB1 PE=1 SV=1	Ceratocystis_fimbriata__gene-CFIMG_006861RA
Ceratocystis_fimbriata__gene-CFIMG_006875RA	1	1385	OTHER	100	sp|I6X8D2|PKS13_MYCTU	1.97e-31	31.5	OTHER	sp|P0AAI7|FABF_ECO57	8.38e-97	52.2	sp|P0AAI7|FABF_ECO57 3-oxoacyl-[acyl-carrier-protein] synthase 2 OS=Escherichia coli O157:H7 OX=83334 GN=fabF PE=3 SV=2	Ceratocystis_fimbriata__gene-CFIMG_006875RA
Chlorociboria_aeruginascens__gene-B7494_g1069__renamed0052	1	8791	hr_pks	100	Chlorociboria_aeruginascens__gene-B7494_g1069	2.1e-307	55.4	hr_pks	sp|Q5KTM9|ALT5_ALTSO	2.17e-188	31.3	sp|Q5KTM9|ALT5_ALTSO Highly reducing polyketide synthase alt5 OS=Alternaria solani OX=48100 GN=alt5 PE=1 SV=1	Chlorociboria_aeruginascens__gene-B7494_g1069
Chlorociboria_aeruginascens__gene-B7494_g1325	1	16187	hr_pks	100	BGC0001724__EPS29069.1	1.11e-129	35.2	hr_pks	sp|A0A481WNP4|TRAA_PENCR	5.77e-300	26.5	sp|A0A481WNP4|TRAA_PENCR Hybrid PKS-NRPS synthetase traA OS=Penicillium crustosum OX=36656 GN=traA PE=3 SV=1	Chlorociboria_aeruginascens__gene-B7494_g1325
Chlorociboria_aeruginascens__gene-B7494_g2486	1	7212	hr_pks	100	BGC0000046__ACZ57548.1	2.82e-109	40.7	hr_pks	sp|D2E9X0|DEP5_ALTBR	2.35e-181	38.2	sp|D2E9X0|DEP5_ALTBR Reducing polyketide synthase DEP5 OS=Alternaria brassicicola OX=29001 GN=DEP5 PE=2 SV=1	Chlorociboria_aeruginascens__gene-B7494_g2486
Chlorociboria_aeruginascens__gene-B7494_g2621	1	10059	OTHER	100	BGC0002483__AUW31052.1	9.52e-150	43.3	OTHER	sp|A0A0R8YWJ7|MPAS_CLAUC	3.22e-177	30.7	sp|A0A0R8YWJ7|MPAS_CLAUC Methylphloroacetophenone synthase OS=Cladonia uncialis OX=174080 GN=mpas PE=1 SV=2	Chlorociboria_aeruginascens__gene-B7494_g2621
Chlorociboria_aeruginascens__gene-B7494_g345	1	12054	hr_pks	100	corynespora_cassiicola_philippines_gca_003016335__gene___BS50DRAFT_664736	2.67e-171	45.9	hr_pks	sp|Q50LG3|AFT91_ALTAL	1.23e-300	40.9	sp|Q50LG3|AFT91_ALTAL Highly reducing polyketide synthase AFT9-1 OS=Alternaria alternata OX=5599 GN=AFT9-1 PE=3 SV=1	Chlorociboria_aeruginascens__gene-B7494_g345
Chlorociboria_aeruginascens__gene-B7494_g3462	1	8178	hr_pks	100	BGC0002729__EAA36364.1	2.49e-192	50	hr_pks	sp|Q7SHI6|SRDA_NEUCR	3.42e-176	50	sp|Q7SHI6|SRDA_NEUCR Highly reducing polyketide synthase srdA OS=Neurospora crassa (strain ATCC 24698 / 74-OR23-1A / CBS 708.71 / DSM 1257 / FGSC 987) OX=367110 GN=srdA PE=2 SV=1	Chlorociboria_aeruginascens__gene-B7494_g3462
Chlorociboria_aeruginascens__gene-B7494_g3946	1	1389	OTHER	100	BGC0001244__AIW00670.1	5.68e-24	30.5	OTHER	sp|Q8L3X9|KASM_ARATH	2.93e-98	63.2	sp|Q8L3X9|KASM_ARATH 3-oxoacyl-[acyl-carrier-protein] synthase, mitochondrial OS=Arabidopsis thaliana OX=3702 GN=KAS PE=1 SV=1	Chlorociboria_aeruginascens__gene-B7494_g3946
Chlorociboria_aeruginascens__gene-B7494_g4683	1	9730	hr_pks	100	sp|A0A0N0DCA3|DEP5_FUSLA	1.78e-183	40.9	hr_pks	sp|D2E9X0|DEP5_ALTBR	0	36.1	sp|D2E9X0|DEP5_ALTBR Reducing polyketide synthase DEP5 OS=Alternaria brassicicola OX=29001 GN=DEP5 PE=2 SV=1	Chlorociboria_aeruginascens__gene-B7494_g4683
Chlorociboria_aeruginascens__gene-B7494_g550	1	6672	OUTLIER	*	None	None	None	None	sp|Q2TXG3|ORYB_ASPOR	5.07e-221	37.9	sp|Q2TXG3|ORYB_ASPOR Fatty acid synthase subunit beta OS=Aspergillus oryzae (strain ATCC 42149 / RIB 40) OX=510516 GN=oryfasB PE=3 SV=1	Chlorociboria_aeruginascens__gene-B7494_g550
Chlorociboria_aeruginascens__gene-B7494_g6164	1	7329	hr_pks	100	BGC0002729__EAA36364.1	1.25e-240	57.5	hr_pks	sp|Q7SHI6|SRDA_NEUCR	0	47.3	sp|Q7SHI6|SRDA_NEUCR Highly reducing polyketide synthase srdA OS=Neurospora crassa (strain ATCC 24698 / 74-OR23-1A / CBS 708.71 / DSM 1257 / FGSC 987) OX=367110 GN=srdA PE=2 SV=1	Chlorociboria_aeruginascens__gene-B7494_g6164
Chlorociboria_aeruginascens__gene-B7494_g6244	1	7009	hr_pks	100	Coleophoma_crateriformis__gene4908	1.43e-210	75.2	hr_pks	sp|N4WHE3|PKS1_COCH4	2.63e-216	32.8	sp|N4WHE3|PKS1_COCH4 Reducing polyketide synthase PKS1 OS=Cochliobolus heterostrophus (strain C4 / ATCC 48331 / race T) OX=665024 GN=PKS1 PE=3 SV=1	Chlorociboria_aeruginascens__gene-B7494_g6244
Chlorociboria_aeruginascens__gene-B7494_g6312	1	7016	OTHER	100	BGC0002734__EAU35431.1	4.37e-277	50.8	OTHER	sp|Q0CRQ5|5MOAS_ASPTN	0	35	sp|Q0CRQ5|5MOAS_ASPTN 5-methylorsellinic acid synthase OS=Aspergillus terreus (strain NIH 2624 / FGSC A1156) OX=341663 GN=ATEG_03629 PE=1 SV=1	Chlorociboria_aeruginascens__gene-B7494_g6312
Chlorociboria_aeruginascens__gene-B7494_g6896	1	12060	hr_pks	100	BGC0001373__BAV32159.1	4.7e-107	30.6	hr_pks	sp|A0A1B4XBH3|SDNO_SORAA	2.5e-242	26.9	sp|A0A1B4XBH3|SDNO_SORAA Highly reducing polyketide synthase sdnO OS=Sordaria araneosa OX=573841 GN=sdnO PE=3 SV=1	Chlorociboria_aeruginascens__gene-B7494_g6896
Chlorociboria_aeruginascens__gene-B7494_g7011	1	6543	OUTLIER	*	None	None	None	None	sp|M2XHU6|HEXB_DOTSN	0	41.5	sp|M2XHU6|HEXB_DOTSN Fatty acid synthase beta subunit hexB OS=Dothistroma septosporum (strain NZE10 / CBS 128990) OX=675120 GN=hexB PE=2 SV=1	Chlorociboria_aeruginascens__gene-B7494_g7011
Chlorociboria_aeruginascens__gene-B7494_g7234	1	6320	OUTLIER	*	None	None	None	None	sp|P34229|FAS1_YARLI	0	59.2	sp|P34229|FAS1_YARLI Fatty acid synthase subunit beta OS=Yarrowia lipolytica (strain CLIB 122 / E 150) OX=284591 GN=FAS1 PE=3 SV=2	Chlorociboria_aeruginascens__gene-B7494_g7234
Chlorociboria_aeruginascens__gene-B7494_g7457	1	5414	OTHER	100	BGC0001275__AAX35547.1	4.61e-224	53.4	OTHER	sp|G1XU04|AR283_ARTOA	0	47.8	sp|G1XU04|AR283_ARTOA 6-methylsalicylic acid synthase OS=Arthrobotrys oligospora (strain ATCC 24927 / CBS 115.81 / DSM 1491) OX=756982 GN=AOL_s00215g283 PE=1 SV=1	Chlorociboria_aeruginascens__gene-B7494_g7457
Chlorociboria_aeruginascens__gene-B7494_g7629	1	9161	OTHER	100	BGC0002253__QKG86295.1	1.65e-278	57.6	OTHER	sp|A0A443HK81|VDTA1_BYSSP	0	51.4	sp|A0A443HK81|VDTA1_BYSSP Non-reducing polyketide synthase VdtA OS=Byssochlamys spectabilis OX=264951 GN=VdtA PE=1 SV=1	Chlorociboria_aeruginascens__gene-B7494_g7629
Chlorociboria_aeruginascens__gene-B7494_g783	1	8597	hr_pks	100	aspergillus_brasiliensis_cbs_101740_gca_001889945__gene___ASPBRDRAFT_199676	3.1e-131	32.9	hr_pks	sp|G4NEB1|NEC1_MAGO7	3.81e-123	31.1	sp|G4NEB1|NEC1_MAGO7 Highly reducing polyketide synthase NEC1 OS=Magnaporthe oryzae (strain 70-15 / ATCC MYA-4617 / FGSC 8958) OX=242507 GN=NEC1 PE=1 SV=1	Chlorociboria_aeruginascens__gene-B7494_g783
Chlorociboria_aeruginascens__gene-B7494_g8071	1	10155	hr_pks	100	BGC0001373__BAV32159.1	8.98e-155	43.1	hr_pks	sp|Q50LG3|AFT91_ALTAL	2.43e-268	37	sp|Q50LG3|AFT91_ALTAL Highly reducing polyketide synthase AFT9-1 OS=Alternaria alternata OX=5599 GN=AFT9-1 PE=3 SV=1	Chlorociboria_aeruginascens__gene-B7494_g8071
Choiromyces_venosus__gene12951	1	6551	OUTLIER	*	None	None	None	None	sp|P34229|FAS1_YARLI	9.71e-319	57.5	sp|P34229|FAS1_YARLI Fatty acid synthase subunit beta OS=Yarrowia lipolytica (strain CLIB 122 / E 150) OX=284591 GN=FAS1 PE=3 SV=2	Choiromyces_venosus__gene12951
Choiromyces_venosus__gene2282	1	6061	OTHER	100	sp|G1XU04|AR283_ARTOA	2.51e-311	56.9	OTHER	sp|G1XU04|AR283_ARTOA	0	50.7	sp|G1XU04|AR283_ARTOA 6-methylsalicylic acid synthase OS=Arthrobotrys oligospora (strain ATCC 24927 / CBS 115.81 / DSM 1491) OX=756982 GN=AOL_s00215g283 PE=1 SV=1	Choiromyces_venosus__gene2282
Choiromyces_venosus__gene3333	1	6778	OTHER	100	BGC0002212__ESK96613.1	1.48e-290	53	OTHER	sp|A0A2H3CTK0|ARMB_ARMGA	0	38.6	sp|A0A2H3CTK0|ARMB_ARMGA Orsellinic acid synthase armB OS=Armillaria gallica OX=47427 GN=armB PE=1 SV=1	Choiromyces_venosus__gene3333
Choiromyces_venosus__gene4234	1	1854	OTHER	100	BGC0000170__EHA22196.1	1.12e-24	33.6	OTHER	sp|Q8L3X9|KASM_ARATH	3.96e-92	51.6	sp|Q8L3X9|KASM_ARATH 3-oxoacyl-[acyl-carrier-protein] synthase, mitochondrial OS=Arabidopsis thaliana OX=3702 GN=KAS PE=1 SV=1	Choiromyces_venosus__gene4234
Choiromyces_venosus__gene5110	1	1500	OTHER	100	sp|A0A455M7S4|ATNG_ARTSZ	4.9e-17	29.3	OTHER	sp|P71019|FABD_BACSU	6.69e-39	35.1	sp|P71019|FABD_BACSU Malonyl CoA-acyl carrier protein transacylase OS=Bacillus subtilis (strain 168) OX=224308 GN=fabD PE=3 SV=2	Choiromyces_venosus__gene5110
Clavispora_lusitaniae__gene1697	1	1371	OTHER	100	BGC0002483__AUW31052.1	1.21e-26	29.2	OTHER	sp|O94297|OXSM_SCHPO	4.77e-121	45.1	sp|O94297|OXSM_SCHPO Putative 3-oxoacyl-[acyl-carrier-protein] synthase, mitochondrial OS=Schizosaccharomyces pombe (strain 972 / ATCC 24843) OX=284812 GN=SPBC887.13c PE=3 SV=1	Clavispora_lusitaniae__gene1697
Clavispora_lusitaniae__gene236	1	6186	OUTLIER	*	None	None	None	None	sp|P34731|FAS1_CANAX	0	74.7	sp|P34731|FAS1_CANAX Fatty acid synthase subunit beta OS=Candida albicans OX=5476 GN=FAS1 PE=1 SV=1	Clavispora_lusitaniae__gene236
Clavispora_lusitaniae__gene5027	1	981	OTHER	100	BGC0000013__CBF79143.1	4.29e-16	24.8	OTHER	sp|Q9R9J2|FENF_BACIU	4.94e-20	28.8	sp|Q9R9J2|FENF_BACIU Malonyl CoA-acyl carrier protein transacylase OS=Bacillus subtilis OX=1423 GN=fenF PE=1 SV=1	Clavispora_lusitaniae__gene5027
Coemansia_reversa__gene-COEREDRAFT_10860	1	12298	OUTLIER	*	None	None	None	None	sp|P34731|FAS1_CANAX	0	40	sp|P34731|FAS1_CANAX Fatty acid synthase subunit beta OS=Candida albicans OX=5476 GN=FAS1 PE=1 SV=1	Coemansia_reversa__gene-COEREDRAFT_10860
Coemansia_reversa__gene-COEREDRAFT_36747	1	11202	OUTLIER	*	None	None	None	None	sp|A0A0D1DNX1|FAS2_USTMA	0	34.4	sp|A0A0D1DNX1|FAS2_USTMA Fatty acid synthase 2 OS=Ustilago maydis (strain 521 / FGSC 9021) OX=237631 GN=fas2 PE=2 SV=1	Coemansia_reversa__gene-COEREDRAFT_36747
Coemansia_reversa__gene-COEREDRAFT_45909	1	11320	OUTLIER	*	None	None	None	None	sp|A0A0D1DNX1|FAS2_USTMA	0	33.6	sp|A0A0D1DNX1|FAS2_USTMA Fatty acid synthase 2 OS=Ustilago maydis (strain 521 / FGSC 9021) OX=237631 GN=fas2 PE=2 SV=1	Coemansia_reversa__gene-COEREDRAFT_45909
Coemansia_reversa__gene-COEREDRAFT_47025	1	981	OUTLIER	*	None	None	None	None	sp|Q9R9J2|FENF_BACIU	2.12e-38	33.9	sp|Q9R9J2|FENF_BACIU Malonyl CoA-acyl carrier protein transacylase OS=Bacillus subtilis OX=1423 GN=fenF PE=1 SV=1	Coemansia_reversa__gene-COEREDRAFT_47025
Coemansia_reversa__gene-COEREDRAFT_47266	1	11115	OUTLIER	*	None	None	None	None	sp|A0A0D1DNX1|FAS2_USTMA	0	34.6	sp|A0A0D1DNX1|FAS2_USTMA Fatty acid synthase 2 OS=Ustilago maydis (strain 521 / FGSC 9021) OX=237631 GN=fas2 PE=2 SV=1	Coemansia_reversa__gene-COEREDRAFT_47266
Coemansia_reversa__gene-COEREDRAFT_67958	1	10780	OUTLIER	*	None	None	None	None	sp|A0A0D1DNX1|FAS2_USTMA	0	34.7	sp|A0A0D1DNX1|FAS2_USTMA Fatty acid synthase 2 OS=Ustilago maydis (strain 521 / FGSC 9021) OX=237631 GN=fas2 PE=2 SV=1	Coemansia_reversa__gene-COEREDRAFT_67958
Coemansia_reversa__gene-COEREDRAFT_86824	1	11418	OUTLIER	*	None	None	None	None	sp|A0A0D1DNX1|FAS2_USTMA	0	38.9	sp|A0A0D1DNX1|FAS2_USTMA Fatty acid synthase 2 OS=Ustilago maydis (strain 521 / FGSC 9021) OX=237631 GN=fas2 PE=2 SV=1	Coemansia_reversa__gene-COEREDRAFT_86824
Coemansia_reversa__gene-COEREDRAFT_97441	1	2172	OTHER	100	sp|P9WQE4|PPSB_MYCTO	1.17e-26	31.8	OTHER	sp|Q8L3X9|KASM_ARATH	4.82e-143	52	sp|Q8L3X9|KASM_ARATH 3-oxoacyl-[acyl-carrier-protein] synthase, mitochondrial OS=Arabidopsis thaliana OX=3702 GN=KAS PE=1 SV=1	Coemansia_reversa__gene-COEREDRAFT_97441
Coleophoma_crateriformis__gene1022	1	8097	hr_pks	100	Lasiodiplodia_theobromae__gene-LTHEOB_11395	7.24e-176	39.7	hr_pks	sp|A0A3G1DJH7|SQTKS_PHOSM	0	34.2	sp|A0A3G1DJH7|SQTKS_PHOSM Squalestatin tetraketide synthase OS=Phoma sp. (strain ATCC 20986 / MF5453) OX=1828523 GN=pks1 PE=1 SV=1	Coleophoma_crateriformis__gene1022
Coleophoma_crateriformis__gene10576	1	8967	hr_pks	100	BGC0001264__BAQ25466.1	0	62.2	hr_pks	sp|A0A1V6PAF7|CALA_PENDC	0	47.3	sp|A0A1V6PAF7|CALA_PENDC Highly reducing polyketide synthase calA OS=Penicillium decumbens OX=69771 GN=calA PE=1 SV=1	Coleophoma_crateriformis__gene10576
Coleophoma_crateriformis__gene1137	1	8312	hr_pks	100	Aspergillus_ustus__gene-HK57_00585	1.13e-178	38.6	hr_pks	sp|A0A3G1DJH7|SQTKS_PHOSM	0	38.3	sp|A0A3G1DJH7|SQTKS_PHOSM Squalestatin tetraketide synthase OS=Phoma sp. (strain ATCC 20986 / MF5453) OX=1828523 GN=pks1 PE=1 SV=1	Coleophoma_crateriformis__gene1137
Coleophoma_crateriformis__gene11781	1	6900	hr_pks	100	BGC0002169__OJJ98486.1	1.27e-129	42.7	hr_pks	sp|A0A1L9WQM9|ACRA_ASPA1	3.85e-119	42.7	sp|A0A1L9WQM9|ACRA_ASPA1 Highly reducing polyketide synthase acrA OS=Aspergillus aculeatus (strain ATCC 16872 / CBS 172.66 / WB 5094) OX=690307 GN=acrA PE=2 SV=1	Coleophoma_crateriformis__gene11781
Coleophoma_crateriformis__gene13246	1	11838	hr_pks	100	BGC0001892__ATZ45182.1	0	58	hr_pks	sp|A0A6J4B487|LUC5_FUSSX	0	42.8	sp|A0A6J4B487|LUC5_FUSSX Hybrid PKS-NRPS synthetase LUC5 OS=Fusarium sp. OX=29916 GN=LUC5 PE=3 SV=1	Coleophoma_crateriformis__gene13246
Coleophoma_crateriformis__gene13251	1	8386	hr_pks	99.8	BGC0002525__BBU37368.1	6.76e-168	41.6	hr_pks	sp|A0A6S5ZY48|G433_FUSSX	1.78e-216	27.9	sp|A0A6S5ZY48|G433_FUSSX Highly reducing polyketide synthase g433 OS=Fusarium sp. OX=29916 GN=g433 PE=2 SV=1	Coleophoma_crateriformis__gene13251
Coleophoma_crateriformis__gene2486	1	7956	hr_pks	100	BGC0001141__AIA58899.1	2.54e-187	39.4	hr_pks	sp|A0A068ABB7|BREF7_EUPBR	0	31.1	sp|A0A068ABB7|BREF7_EUPBR Highly reducing polyketide synthase OS=Eupenicillium brefeldianum OX=1131482 GN=Bref-PKS PE=1 SV=1	Coleophoma_crateriformis__gene2486
Coleophoma_crateriformis__gene2916	1	7292	hr_pks	100	Coleophoma_cylindrospora__gene1252	0	86	hr_pks	sp|N4WHE3|PKS1_COCH4	6.68e-285	30.1	sp|N4WHE3|PKS1_COCH4 Reducing polyketide synthase PKS1 OS=Cochliobolus heterostrophus (strain C4 / ATCC 48331 / race T) OX=665024 GN=PKS1 PE=3 SV=1	Coleophoma_crateriformis__gene2916
Coleophoma_crateriformis__gene3379	1	8553	hr_pks	100	Colletotrichum_musicola__gene-CMUS01_00567	3.51e-234	46	hr_pks	sp|Q5KTM9|ALT5_ALTSO	0	37.8	sp|Q5KTM9|ALT5_ALTSO Highly reducing polyketide synthase alt5 OS=Alternaria solani OX=48100 GN=alt5 PE=1 SV=1	Coleophoma_crateriformis__gene3379
Coleophoma_crateriformis__gene4086	1	1389	OTHER	100	BGC0001244__AIW00670.1	2.39e-24	33	OTHER	sp|Q8L3X9|KASM_ARATH	1.04e-98	63.6	sp|Q8L3X9|KASM_ARATH 3-oxoacyl-[acyl-carrier-protein] synthase, mitochondrial OS=Arabidopsis thaliana OX=3702 GN=KAS PE=1 SV=1	Coleophoma_crateriformis__gene4086
Coleophoma_crateriformis__gene4679	1	6330	OUTLIER	*	None	None	None	None	sp|P34229|FAS1_YARLI	0	59.7	sp|P34229|FAS1_YARLI Fatty acid synthase subunit beta OS=Yarrowia lipolytica (strain CLIB 122 / E 150) OX=284591 GN=FAS1 PE=3 SV=2	Coleophoma_crateriformis__gene4679
Coleophoma_crateriformis__gene4872	1	9092	hr_pks	100	sp|A0A084API3|SAT13_STACB	4.79e-115	34.6	hr_pks	sp|A0A345BJP0|CLZ2_COCLU	3.34e-175	27	sp|A0A345BJP0|CLZ2_COCLU Squalestatin tetraketide synthase clz2 OS=Cochliobolus lunatus OX=5503 GN=clz2 PE=3 SV=1	Coleophoma_crateriformis__gene4872
Coleophoma_crateriformis__gene4908__renamed0057	1	6970	hr_pks	100	Coleophoma_crateriformis__gene4908	6.5e-302	60.1	hr_pks	sp|N4WHE3|PKS1_COCH4	8.01e-263	30.2	sp|N4WHE3|PKS1_COCH4 Reducing polyketide synthase PKS1 OS=Cochliobolus heterostrophus (strain C4 / ATCC 48331 / race T) OX=665024 GN=PKS1 PE=3 SV=1	Coleophoma_crateriformis__gene4908
Coleophoma_crateriformis__gene6073	1	7357	hr_pks	100	BGC0002729__EAA36364.1	0	60.7	hr_pks	sp|Q7SHI6|SRDA_NEUCR	0	56.1	sp|Q7SHI6|SRDA_NEUCR Highly reducing polyketide synthase srdA OS=Neurospora crassa (strain ATCC 24698 / 74-OR23-1A / CBS 708.71 / DSM 1257 / FGSC 987) OX=367110 GN=srdA PE=2 SV=1	Coleophoma_crateriformis__gene6073
Coleophoma_crateriformis__gene6260	1	6701	OTHER	100	sp|P9WET3|PREU8_PREIS	2.29e-258	55.9	OTHER	sp|A7UMW1|PKS1_ELSFA	0	47.8	sp|A7UMW1|PKS1_ELSFA Non-reducing polyketide synthase 1 OS=Elsinoe fawcettii OX=40997 GN=PKS1 PE=2 SV=1	Coleophoma_crateriformis__gene6260
Coleophoma_crateriformis__gene6604	1	7908	hr_pks	100	BGC0001141__AIA58899.1	2.05e-209	42.1	hr_pks	sp|A0A068ABB7|BREF7_EUPBR	0	38.4	sp|A0A068ABB7|BREF7_EUPBR Highly reducing polyketide synthase OS=Eupenicillium brefeldianum OX=1131482 GN=Bref-PKS PE=1 SV=1	Coleophoma_crateriformis__gene6604
Coleophoma_crateriformis__gene7197	1	7855	hr_pks	100	sp|A0A0E4AZP0|FSA1_FUSSF	5.23e-149	56.4	hr_pks	sp|Q5SBL6|FSDS_FUSHE	0	43.8	sp|Q5SBL6|FSDS_FUSHE Fusaridione A synthetase fsdS OS=Fusarium heterosporum OX=42747 GN=fsdS PE=3 SV=2	Coleophoma_crateriformis__gene7197
Coleophoma_crateriformis__gene7215	1	7016	hr_pks	100	BGC0001857__QBE85649.1	1.34e-152	58.4	hr_pks	sp|A0A411L027|BUAA_ASPBU	0	47.6	sp|A0A411L027|BUAA_ASPBU Hybrid PKS-NRPS synthetase buaA OS=Aspergillus burnettii OX=2508778 GN=buaA PE=3 SV=1	Coleophoma_crateriformis__gene7215
Coleophoma_crateriformis__gene7216	1	972	hr_pks	100	BGC0001857__QBE85649.1	2.17e-123	62.7	hr_pks	sp|A0A411L027|BUAA_ASPBU	6.18e-119	62.5	sp|A0A411L027|BUAA_ASPBU Hybrid PKS-NRPS synthetase buaA OS=Aspergillus burnettii OX=2508778 GN=buaA PE=3 SV=1	Coleophoma_crateriformis__gene7216
Coleophoma_crateriformis__gene7546	1	8082	hr_pks	100	BGC0002255__AMJ52080.1	0	78.3	hr_pks	sp|Q0CF75|AZPB1_ASPTN	0	51	sp|Q0CF75|AZPB1_ASPTN Highly reducing polyketide synthase ATEG_07659 OS=Aspergillus terreus (strain NIH 2624 / FGSC A1156) OX=341663 GN=ATEG_07659 PE=1 SV=1	Coleophoma_crateriformis__gene7546
Coleophoma_crateriformis__gene7558	1	8079	OTHER	100	BGC0002255__AMJ52084.1	0	84.7	OTHER	sp|Q0CF73|AZPB2_ASPTN	0	58.2	sp|Q0CF73|AZPB2_ASPTN Non-reducing polyketide synthase ATEG_07661 OS=Aspergillus terreus (strain NIH 2624 / FGSC A1156) OX=341663 GN=ATEG_07661 PE=1 SV=1	Coleophoma_crateriformis__gene7558
Coleophoma_crateriformis__gene8080	1	8132	hr_pks	100	talaromyces_stipitatus_atcc_10500_gca_000003125__gene___TSTA_125550	1.98e-173	43.4	hr_pks	sp|N4WHE3|PKS1_COCH4	0	38.1	sp|N4WHE3|PKS1_COCH4 Reducing polyketide synthase PKS1 OS=Cochliobolus heterostrophus (strain C4 / ATCC 48331 / race T) OX=665024 GN=PKS1 PE=3 SV=1	Coleophoma_crateriformis__gene8080
Coleophoma_crateriformis__gene8293	1	8434	hr_pks	100	pseudogymnoascus_sp_23342_1_i1_gca_001662575__gene___VE03_08387	5.71e-149	34.6	hr_pks	sp|Q5BA83|EASB_EMENI	0	31.8	sp|Q5BA83|EASB_EMENI Highly reducing polyketide synthase easB OS=Emericella nidulans (strain FGSC A4 / ATCC 38163 / CBS 112.46 / NRRL 194 / M139) OX=227321 GN=easB PE=3 SV=1	Coleophoma_crateriformis__gene8293
Coleophoma_crateriformis__gene8735	1	1323	OTHER	100	sp|A0A1B3PEI6|PFA1_THRS2	5.85e-16	27.2	OTHER	sp|P73242|FABD_SYNY3	3.3e-24	29.1	sp|P73242|FABD_SYNY3 Malonyl CoA-acyl carrier protein transacylase OS=Synechocystis sp. (strain PCC 6803 / Kazusa) OX=1111708 GN=fabD PE=1 SV=1	Coleophoma_crateriformis__gene8735
Coleophoma_cylindrospora__gene10147	1	7297	hr_pks	100	BGC0002729__EAA36364.1	1.39e-305	58.4	hr_pks	sp|Q7SHI6|SRDA_NEUCR	0	47	sp|Q7SHI6|SRDA_NEUCR Highly reducing polyketide synthase srdA OS=Neurospora crassa (strain ATCC 24698 / 74-OR23-1A / CBS 708.71 / DSM 1257 / FGSC 987) OX=367110 GN=srdA PE=2 SV=1	Coleophoma_cylindrospora__gene10147
Coleophoma_cylindrospora__gene10158	1	7394	hr_pks	100	sp|A0A0N0DCA3|DEP5_FUSLA	5.95e-180	72.6	hr_pks	sp|D2E9X0|DEP5_ALTBR	8.8e-251	31.9	sp|D2E9X0|DEP5_ALTBR Reducing polyketide synthase DEP5 OS=Alternaria brassicicola OX=29001 GN=DEP5 PE=2 SV=1	Coleophoma_cylindrospora__gene10158
Coleophoma_cylindrospora__gene10300	1	9090	hr_pks	100	colletotrichum_nymphaeae_sa_01_gca_001563115__gene___CNYM01_01551	1.29e-191	38.9	hr_pks	sp|A0A084API3|SAT13_STACB	2.11e-294	30.7	sp|A0A084API3|SAT13_STACB Highly reducing polyketide synthase SAT13 OS=Stachybotrys chartarum (strain CBS 109288 / IBT 7711) OX=1280523 GN=SAT13 PE=3 SV=1	Coleophoma_cylindrospora__gene10300
Coleophoma_cylindrospora__gene10497	1	6330	OUTLIER	*	None	None	None	None	sp|P34229|FAS1_YARLI	0	59.9	sp|P34229|FAS1_YARLI Fatty acid synthase subunit beta OS=Yarrowia lipolytica (strain CLIB 122 / E 150) OX=284591 GN=FAS1 PE=3 SV=2	Coleophoma_cylindrospora__gene10497
Coleophoma_cylindrospora__gene11186	1	8966	hr_pks	100	BGC0001264__BAQ25466.1	0	62.6	hr_pks	sp|A0A0C6E0I7|BET1_NEOBT	0	43	sp|A0A0C6E0I7|BET1_NEOBT Highly reducing polyketide synthase bet1 OS=Neocamarosporium betae OX=1979465 GN=bet1 PE=1 SV=1	Coleophoma_cylindrospora__gene11186
Coleophoma_cylindrospora__gene1252__renamed0058	1	7259	hr_pks	100	Coleophoma_cylindrospora__gene1252	2.28e-302	57.2	hr_pks	sp|B3FWU0|RDC5_METCM	3.37e-185	27.7	sp|B3FWU0|RDC5_METCM Reducing polyketide synthase rdc5 OS=Metacordyceps chlamydosporia OX=280754 GN=rdc5 PE=1 SV=1	Coleophoma_cylindrospora__gene1252
Coleophoma_cylindrospora__gene14028	1	6904	hr_pks	100	BGC0002210__FAA01291.1	1.15e-141	34.6	hr_pks	sp|A5ABG0|PYNA_ASPNC	1.03e-145	28.3	sp|A5ABG0|PYNA_ASPNC Hybrid PKS-NRPS synthetase pynA OS=Aspergillus niger (strain CBS 513.88 / FGSC A1513) OX=425011 GN=pynA PE=1 SV=1	Coleophoma_cylindrospora__gene14028
Coleophoma_cylindrospora__gene1697	1	7943	hr_pks	100	BGC0001141__AIA58899.1	3.02e-149	38	hr_pks	sp|A0A068ABB7|BREF7_EUPBR	0	33.3	sp|A0A068ABB7|BREF7_EUPBR Highly reducing polyketide synthase OS=Eupenicillium brefeldianum OX=1131482 GN=Bref-PKS PE=1 SV=1	Coleophoma_cylindrospora__gene1697
Coleophoma_cylindrospora__gene192	1	8696	hr_pks	100	pseudogymnoascus_verrucosus_gca_001662655__gene___VE01_06685	7.58e-123	39.9	hr_pks	sp|Q86ZD9|SQTKS_PHOSC	0	36.2	sp|Q86ZD9|SQTKS_PHOSC Squalestatin tetraketide synthase OS=Phoma sp. (strain C2932) OX=86977 GN=pks1 PE=1 SV=1	Coleophoma_cylindrospora__gene192
Coleophoma_cylindrospora__gene3215	1	8542	hr_pks	100	phyllosticta_citriasiana_cbs_120486__estExt_Genemark1.C_40430	1.85e-238	53.4	hr_pks	sp|Q5KTM9|ALT5_ALTSO	0	41.5	sp|Q5KTM9|ALT5_ALTSO Highly reducing polyketide synthase alt5 OS=Alternaria solani OX=48100 GN=alt5 PE=1 SV=1	Coleophoma_cylindrospora__gene3215
Coleophoma_cylindrospora__gene4250	1	7815	hr_pks	100	sp|A0A0E4AZP0|FSA1_FUSSF	0	58.2	hr_pks	sp|Q5SBL6|FSDS_FUSHE	0	46.7	sp|Q5SBL6|FSDS_FUSHE Fusaridione A synthetase fsdS OS=Fusarium heterosporum OX=42747 GN=fsdS PE=3 SV=2	Coleophoma_cylindrospora__gene4250
Coleophoma_cylindrospora__gene4264	1	8005	OTHER	100	BGC0002196__QBK15044.1	0	68.8	OTHER	sp|A0A481WQB6|CLAF_PENCR	0	64.9	sp|A0A481WQB6|CLAF_PENCR Clavatol synthase claF OS=Penicillium crustosum OX=36656 GN=claF PE=1 SV=1	Coleophoma_cylindrospora__gene4264
Coleophoma_cylindrospora__gene5224	1	1323	OTHER	100	sp|A0A1B3PEI6|PFA1_THRS2	1.81e-15	27.2	OTHER	sp|P73242|FABD_SYNY3	2.19e-23	28.8	sp|P73242|FABD_SYNY3 Malonyl CoA-acyl carrier protein transacylase OS=Synechocystis sp. (strain PCC 6803 / Kazusa) OX=1111708 GN=fabD PE=1 SV=1	Coleophoma_cylindrospora__gene5224
Coleophoma_cylindrospora__gene5571	1	1389	OTHER	100	BGC0001244__AIW00670.1	5.68e-24	33.5	OTHER	sp|Q8L3X9|KASM_ARATH	1.16e-97	64.1	sp|Q8L3X9|KASM_ARATH 3-oxoacyl-[acyl-carrier-protein] synthase, mitochondrial OS=Arabidopsis thaliana OX=3702 GN=KAS PE=1 SV=1	Coleophoma_cylindrospora__gene5571
Coleophoma_cylindrospora__gene6108	1	6407	OUTLIER	*	None	None	None	None	sp|P34229|FAS1_YARLI	0	46	sp|P34229|FAS1_YARLI Fatty acid synthase subunit beta OS=Yarrowia lipolytica (strain CLIB 122 / E 150) OX=284591 GN=FAS1 PE=3 SV=2	Coleophoma_cylindrospora__gene6108
Coleophoma_cylindrospora__gene6209	1	8064	OTHER	100	BGC0002255__AMJ52084.1	0	84.6	OTHER	sp|Q0CF73|AZPB2_ASPTN	0	58.2	sp|Q0CF73|AZPB2_ASPTN Non-reducing polyketide synthase ATEG_07661 OS=Aspergillus terreus (strain NIH 2624 / FGSC A1156) OX=341663 GN=ATEG_07661 PE=1 SV=1	Coleophoma_cylindrospora__gene6209
Coleophoma_cylindrospora__gene6222	1	8080	hr_pks	100	BGC0002255__AMJ52080.1	0	75.8	hr_pks	sp|Q0CF75|AZPB1_ASPTN	0	50.8	sp|Q0CF75|AZPB1_ASPTN Highly reducing polyketide synthase ATEG_07659 OS=Aspergillus terreus (strain NIH 2624 / FGSC A1156) OX=341663 GN=ATEG_07659 PE=1 SV=1	Coleophoma_cylindrospora__gene6222
Coleophoma_cylindrospora__gene6235	1	7839	hr_pks	100	BGC0002525__BBU37368.1	3.92e-238	47.4	hr_pks	sp|A0A6S5ZY48|G433_FUSSX	0	40.7	sp|A0A6S5ZY48|G433_FUSSX Highly reducing polyketide synthase g433 OS=Fusarium sp. OX=29916 GN=g433 PE=2 SV=1	Coleophoma_cylindrospora__gene6235
Coleophoma_cylindrospora__gene6583	1	7049	OTHER	100	BGC0001242__CCE67070.1	0	71.9	OTHER	sp|S0DTP6|FSR1_GIBF5	0	61.9	sp|S0DTP6|FSR1_GIBF5 Non-reducing polyketide synthase fsr1 OS=Gibberella fujikuroi (strain CBS 195.34 / IMI 58289 / NRRL A-6831) OX=1279085 GN=FSR1 PE=2 SV=1	Coleophoma_cylindrospora__gene6583
Coleophoma_cylindrospora__gene7755	1	8306	hr_pks	100	Aspergillus_ustus__gene-HK57_00585	0	57.2	hr_pks	sp|A0A3G1DJH7|SQTKS_PHOSM	0	42.8	sp|A0A3G1DJH7|SQTKS_PHOSM Squalestatin tetraketide synthase OS=Phoma sp. (strain ATCC 20986 / MF5453) OX=1828523 GN=pks1 PE=1 SV=1	Coleophoma_cylindrospora__gene7755
Coleophoma_cylindrospora__gene8030	1	6835	OTHER	100	BGC0001708__PKX88487.1	1.92e-220	51.4	OTHER	sp|A0A0B5KU17|MPAC2_PENBR	0	40.7	sp|A0A0B5KU17|MPAC2_PENBR Non-reducing polyketide synthase mapC' OS=Penicillium brevicompactum OX=5074 GN=mpaC' PE=1 SV=1	Coleophoma_cylindrospora__gene8030
Coleophoma_cylindrospora__gene9151	1	8245	hr_pks	100	pseudogymnoascus_sp_23342_1_i1_gca_001662575__gene___VE03_08387	2.09e-136	35.6	hr_pks	sp|Q86ZD9|SQTKS_PHOSC	0	32.6	sp|Q86ZD9|SQTKS_PHOSC Squalestatin tetraketide synthase OS=Phoma sp. (strain C2932) OX=86977 GN=pks1 PE=1 SV=1	Coleophoma_cylindrospora__gene9151
Coleophoma_cylindrospora__gene9229	1	7345	hr_pks	100	BGC0002729__EAA36364.1	3.39e-268	62.6	hr_pks	sp|Q7SHI6|SRDA_NEUCR	0	50.8	sp|Q7SHI6|SRDA_NEUCR Highly reducing polyketide synthase srdA OS=Neurospora crassa (strain ATCC 24698 / 74-OR23-1A / CBS 708.71 / DSM 1257 / FGSC 987) OX=367110 GN=srdA PE=2 SV=1	Coleophoma_cylindrospora__gene9229
Coleophoma_cylindrospora__gene9420	1	6654	OTHER	100	sp|P9WET3|PREU8_PREIS	0	58.6	OTHER	sp|A7UMW1|PKS1_ELSFA	0	47.2	sp|A7UMW1|PKS1_ELSFA Non-reducing polyketide synthase 1 OS=Elsinoe fawcettii OX=40997 GN=PKS1 PE=2 SV=1	Coleophoma_cylindrospora__gene9420
Coleophoma_cylindrospora__gene9773	1	444	hr_pks	100	BGC0002227__GAA85575.1	1.16e-54	66.7	hr_pks	sp|A0A068ABB7|BREF7_EUPBR	1.39e-54	62.1	sp|A0A068ABB7|BREF7_EUPBR Highly reducing polyketide synthase OS=Eupenicillium brefeldianum OX=1131482 GN=Bref-PKS PE=1 SV=1	Coleophoma_cylindrospora__gene9773
Coleophoma_cylindrospora__gene9774	1	7276	hr_pks	100	BGC0001141__AIA58899.1	4.66e-170	51.9	hr_pks	sp|A0A068ABB7|BREF7_EUPBR	1.04e-243	32.3	sp|A0A068ABB7|BREF7_EUPBR Highly reducing polyketide synthase OS=Eupenicillium brefeldianum OX=1131482 GN=Bref-PKS PE=1 SV=1	Coleophoma_cylindrospora__gene9774
Colletotrichum_higginsianum__gene10335	1	8254	hr_pks	100	Colletotrichum_musicola__gene-CMUS01_00567	1.38e-314	55.5	hr_pks	sp|Q5KTM9|ALT5_ALTSO	0	63.3	sp|Q5KTM9|ALT5_ALTSO Highly reducing polyketide synthase alt5 OS=Alternaria solani OX=48100 GN=alt5 PE=1 SV=1	Colletotrichum_higginsianum__gene10335
Colletotrichum_higginsianum__gene10644	1	9805	hr_pks	100	BGC0000039__BAC20564.1	1.8e-310	70.7	hr_pks	sp|Q3S2T9|MOKA_MONPI	0	45.7	sp|Q3S2T9|MOKA_MONPI Lovastatin nonaketide synthase mokA OS=Monascus pilosus OX=89488 GN=mokA PE=1 SV=1	Colletotrichum_higginsianum__gene10644
Colletotrichum_higginsianum__gene10647	1	8044	hr_pks	100	BGC0000039__BAC20566.1	2.96e-235	49.6	hr_pks	sp|Q8J0F5|MLCB_PENCI	0	58.2	sp|Q8J0F5|MLCB_PENCI Compactin diketide synthase mlcB OS=Penicillium citrinum OX=5077 GN=mlcB PE=1 SV=1	Colletotrichum_higginsianum__gene10647
Colletotrichum_higginsianum__gene11484	1	8636	hr_pks	100	zopfia_rhizophila__estExt_Genewise1Plus.C_870143	4.91e-160	43.4	hr_pks	sp|A0A0U5GK88|AUSV_ASPCI	4.42e-180	37.4	sp|A0A0U5GK88|AUSV_ASPCI Highly reducing polyketide synthase ausV OS=Aspergillus calidoustus OX=454130 GN=ausV PE=1 SV=1	Colletotrichum_higginsianum__gene11484
Colletotrichum_higginsianum__gene12220	1	8065	OTHER	100	sp|Q5AUX7|DBAI_EMENI	0	63.1	OTHER	sp|Q5AUX7|DBAI_EMENI	0	53.7	sp|Q5AUX7|DBAI_EMENI Non-reducing polyketide synthase dbaI OS=Emericella nidulans (strain FGSC A4 / ATCC 38163 / CBS 112.46 / NRRL 194 / M139) OX=227321 GN=dbaI PE=1 SV=2	Colletotrichum_higginsianum__gene12220
Colletotrichum_higginsianum__gene12274	1	7989	OTHER	100	BGC0002483__AUW31052.1	2.99e-236	47.9	OTHER	sp|Q0CRQ5|5MOAS_ASPTN	0	36.7	sp|Q0CRQ5|5MOAS_ASPTN 5-methylorsellinic acid synthase OS=Aspergillus terreus (strain NIH 2624 / FGSC A1156) OX=341663 GN=ATEG_03629 PE=1 SV=1	Colletotrichum_higginsianum__gene12274
Colletotrichum_higginsianum__gene12366	1	7715	hr_pks	100	sp|A0A2Z5TM64|HIMA_ASPJA	3.67e-321	56.6	hr_pks	sp|A0A2Z5TM64|HIMA_ASPJA	0	41.2	sp|A0A2Z5TM64|HIMA_ASPJA Polyketide synthase-nonribosomal peptide synthetase hybrid himA OS=Aspergillus japonicus OX=34381 GN=himA PE=3 SV=1	Colletotrichum_higginsianum__gene12366
Colletotrichum_higginsianum__gene1270	1	12605	hr_pks	100	BGC0002505__QOJ72663.1	0	57.3	hr_pks	sp|G2Q9A5|MYCA_MYCTT	0	37.2	sp|G2Q9A5|MYCA_MYCTT Hybrid PKS-NRPS synthetase mycA OS=Myceliophthora thermophila (strain ATCC 42464 / BCRC 31852 / DSM 1799) OX=573729 GN=mycA PE=1 SV=1	Colletotrichum_higginsianum__gene1270
Colletotrichum_higginsianum__gene13249	1	8027	hr_pks	100	BGC0002525__BBU37368.1	7.04e-145	39.1	hr_pks	sp|A0A6S5ZY48|G433_FUSSX	6.96e-255	36.6	sp|A0A6S5ZY48|G433_FUSSX Highly reducing polyketide synthase g433 OS=Fusarium sp. OX=29916 GN=g433 PE=2 SV=1	Colletotrichum_higginsianum__gene13249
Colletotrichum_higginsianum__gene13257	1	6280	hr_pks	100	BGC0001358__OAQ83760.1	1.05e-179	37.4	hr_pks	sp|A0A6S5ZY48|G433_FUSSX	1.1e-250	31.1	sp|A0A6S5ZY48|G433_FUSSX Highly reducing polyketide synthase g433 OS=Fusarium sp. OX=29916 GN=g433 PE=2 SV=1	Colletotrichum_higginsianum__gene13257
Colletotrichum_higginsianum__gene13451	1	8930	hr_pks	100	BGC0001907__gene4	1.35e-151	35.5	hr_pks	sp|A0A6S5ZY48|G433_FUSSX	0	34.3	sp|A0A6S5ZY48|G433_FUSSX Highly reducing polyketide synthase g433 OS=Fusarium sp. OX=29916 GN=g433 PE=2 SV=1	Colletotrichum_higginsianum__gene13451
Colletotrichum_higginsianum__gene13788	1	7753	hr_pks	99.9	BGC0002525__BBU37368.1	2.1e-291	52.9	hr_pks	sp|A0A6S5ZY48|G433_FUSSX	0	42.2	sp|A0A6S5ZY48|G433_FUSSX Highly reducing polyketide synthase g433 OS=Fusarium sp. OX=29916 GN=g433 PE=2 SV=1	Colletotrichum_higginsianum__gene13788
Colletotrichum_higginsianum__gene13913	1	7664	hr_pks	100	lentithecium_fluviatile__estExt_Genewise1Plus.C_2_t10077	2.6e-202	53.9	hr_pks	sp|C8VJR7|ALNA_EMENI	6.83e-241	34.5	sp|C8VJR7|ALNA_EMENI Highly reducing polyketide synthase alnA OS=Emericella nidulans (strain FGSC A4 / ATCC 38163 / CBS 112.46 / NRRL 194 / M139) OX=227321 GN=alnA PE=1 SV=1	Colletotrichum_higginsianum__gene13913
Colletotrichum_higginsianum__gene13916	1	2351	hr_pks	100	Colletotrichum_scovillei__gene-HER10_EVM0001067	5.12e-262	64.2	hr_pks	sp|E5A7D9|PKS5_LEPMJ	3.01e-137	50.2	sp|E5A7D9|PKS5_LEPMJ Highly reducing polyketide synthase pks5 OS=Leptosphaeria maculans (strain JN3 / isolate v23.1.3 / race Av1-4-5-6-7-8) OX=985895 GN=pks5 PE=2 SV=1	Colletotrichum_higginsianum__gene13916
Colletotrichum_higginsianum__gene13917	1	5648	hr_pks	100	colletotrichum_nymphaeae_sa_01_gca_001563115__gene___CNYM01_00149	1.13e-77	75.1	hr_pks	sp|A0A3G1DJH7|SQTKS_PHOSM	0	43.2	sp|A0A3G1DJH7|SQTKS_PHOSM Squalestatin tetraketide synthase OS=Phoma sp. (strain ATCC 20986 / MF5453) OX=1828523 GN=pks1 PE=1 SV=1	Colletotrichum_higginsianum__gene13917
Colletotrichum_higginsianum__gene13996	1	6360	OUTLIER	*	None	None	None	None	sp|P34229|FAS1_YARLI	0	59.3	sp|P34229|FAS1_YARLI Fatty acid synthase subunit beta OS=Yarrowia lipolytica (strain CLIB 122 / E 150) OX=284591 GN=FAS1 PE=3 SV=2	Colletotrichum_higginsianum__gene13996
Colletotrichum_higginsianum__gene14001	1	8443	hr_pks	100	sp|P0DUK1|PSPA_PENSO	5.88e-120	42.1	hr_pks	sp|P0DUK1|PSPA_PENSO	1.33e-269	30.8	sp|P0DUK1|PSPA_PENSO Highly reducing polyketide synthase pspA OS=Penicillium soppii OX=69789 GN=pspA PE=3 SV=1	Colletotrichum_higginsianum__gene14001
Colletotrichum_higginsianum__gene14029	1	12949	hr_pks	100	BGC0001136__ADN43685.1	8.75e-161	50	hr_pks	sp|Q5ATG8|APDA_EMENI	0	32.8	sp|Q5ATG8|APDA_EMENI Hybrid PKS-NRPS synthetase apdA OS=Emericella nidulans (strain FGSC A4 / ATCC 38163 / CBS 112.46 / NRRL 194 / M139) OX=227321 GN=apdA PE=1 SV=1	Colletotrichum_higginsianum__gene14029
Colletotrichum_higginsianum__gene14281	1	10072	hr_pks	100	BGC0000039__BAC20564.1	9.63e-171	47.8	hr_pks	sp|Q8J0F7|MLCA_PENCI	0	34	sp|Q8J0F7|MLCA_PENCI Compactin nonaketide synthase, polyketide synthase component OS=Penicillium citrinum OX=5077 GN=mlcA PE=1 SV=1	Colletotrichum_higginsianum__gene14281
Colletotrichum_higginsianum__gene143	1	881	hr_pks	100	BGC0001892__ATZ45182.1	2.31e-83	50.2	hr_pks	sp|B1GVX7|BOA6_BOTFB	1.77e-79	50.2	sp|B1GVX7|BOA6_BOTFB Reducing polyketide synthase BOA6 OS=Botryotinia fuckeliana (strain B05.10) OX=332648 GN=BOA6 PE=2 SV=1	Colletotrichum_higginsianum__gene143
Colletotrichum_higginsianum__gene14315	1	8212	hr_pks	100	Ophiocordyceps_sinensis__gene-G6O67_007912	2.81e-198	47.7	hr_pks	sp|G4NEB1|NEC1_MAGO7	6.39e-210	34.3	sp|G4NEB1|NEC1_MAGO7 Highly reducing polyketide synthase NEC1 OS=Magnaporthe oryzae (strain 70-15 / ATCC MYA-4617 / FGSC 8958) OX=242507 GN=NEC1 PE=1 SV=1	Colletotrichum_higginsianum__gene14315
Colletotrichum_higginsianum__gene14347__renamed0068	1	7641	macrolactone_ancestral_clade	100	Colletotrichum_higginsianum__gene14347	0	99.8	macrolactone_ancestral_clade	sp|A0A098D8A0|ZEA2_GIBZE	0	32	sp|A0A098D8A0|ZEA2_GIBZE Highly reducing polyketide synthase ZEA2 OS=Gibberella zeae (strain ATCC MYA-4620 / CBS 123657 / FGSC 9075 / NRRL 31084 / PH-1) OX=229533 GN=ZEA2 PE=2 SV=1	Colletotrichum_higginsianum__gene14347
Colletotrichum_higginsianum__gene14348	1	7451	OTHER	100	sp|A0A098D6U0|ZEA1_GIBZE	6.93e-127	50.6	OTHER	sp|A0A125R003|CLA3_CLACD	6.21e-191	30.7	sp|A0A125R003|CLA3_CLACD Non-reducing polyketide synthase cla3 OS=Cladosporium cladosporioides OX=29917 GN=cla3 PE=1 SV=1	Colletotrichum_higginsianum__gene14348
Colletotrichum_higginsianum__gene14369	1	8036	OTHER	100	BGC0002537__BCD52390.1	1.37e-122	43	OTHER	sp|A0A097ZPE0|ANDM_EMEVA	4.72e-308	39.3	sp|A0A097ZPE0|ANDM_EMEVA Non-reducing polyketide synthase andM OS=Emericella variicolor OX=1549217 GN=andM PE=1 SV=1	Colletotrichum_higginsianum__gene14369
Colletotrichum_higginsianum__gene144	1	7165	hr_pks	100	BGC0001445__EED49862.1	3.81e-104	40.5	hr_pks	sp|S0EEY3|FUS1_GIBF5	1.17e-151	33.4	sp|S0EEY3|FUS1_GIBF5 Fusarin C synthetase OS=Gibberella fujikuroi (strain CBS 195.34 / IMI 58289 / NRRL A-6831) OX=1279085 GN=FUS1 PE=1 SV=1	Colletotrichum_higginsianum__gene144
Colletotrichum_higginsianum__gene14520	1	8478	hr_pks	100	chalara_longipes_bdj__estExt_Genewise1.C_9_t30459	3.3e-177	37.2	hr_pks	sp|Q0CF75|AZPB1_ASPTN	0	32.9	sp|Q0CF75|AZPB1_ASPTN Highly reducing polyketide synthase ATEG_07659 OS=Aspergillus terreus (strain NIH 2624 / FGSC A1156) OX=341663 GN=ATEG_07659 PE=1 SV=1	Colletotrichum_higginsianum__gene14520
Colletotrichum_higginsianum__gene14555	1	450	hr_pks,OTHER	87.7,12.3	BGC0002205__EAT91803.2	8.2e-20	72	hr_pks	sp|Q0V6Q6|PHMA_PHANO	2.87e-17	72	sp|Q0V6Q6|PHMA_PHANO Polyketide synthase-nonribosomal peptide synthetase phmA OS=Phaeosphaeria nodorum (strain SN15 / ATCC MYA-4574 / FGSC 10173) OX=321614 GN=phmA PE=1 SV=2	Colletotrichum_higginsianum__gene14555
Colletotrichum_higginsianum__gene147	1	8349	hr_pks	100	aspergillus_sydowii_cbs_593_65_gca_001890705__gene___ASPSYDRAFT_62430	1.17e-171	44.4	hr_pks	sp|C8VJR7|ALNA_EMENI	0	32.9	sp|C8VJR7|ALNA_EMENI Highly reducing polyketide synthase alnA OS=Emericella nidulans (strain FGSC A4 / ATCC 38163 / CBS 112.46 / NRRL 194 / M139) OX=227321 GN=alnA PE=1 SV=1	Colletotrichum_higginsianum__gene147
Colletotrichum_higginsianum__gene1562	1	8566	hr_pks	100	colletotrichum_graminicola__gene___GLRG_01860	1.71e-190	57.6	hr_pks	sp|G4NEB1|NEC1_MAGO7	0	46.6	sp|G4NEB1|NEC1_MAGO7 Highly reducing polyketide synthase NEC1 OS=Magnaporthe oryzae (strain 70-15 / ATCC MYA-4617 / FGSC 8958) OX=242507 GN=NEC1 PE=1 SV=1	Colletotrichum_higginsianum__gene1562
Colletotrichum_higginsianum__gene1781	1	8661	hr_pks	100	BGC0000039__BAC20566.1	1.59e-130	47.8	hr_pks	sp|G3XMD1|AZAB_ASPNA	0	38.9	sp|G3XMD1|AZAB_ASPNA Highly reducing polyketide synthase azaB OS=Aspergillus niger (strain ATCC 1015 / CBS 113.46 / FGSC A1144 / LSHB Ac4 / NCTC 3858a / NRRL 328 / USDA 3528.7) OX=380704 GN=azaB PE=1 SV=1	Colletotrichum_higginsianum__gene1781
Colletotrichum_higginsianum__gene2179	1	2038	hr_pks	100	BGC0002222__BBU42026.1	4.81e-55	38.9	hr_pks	sp|N4WHE3|PKS1_COCH4	6.1e-49	38.7	sp|N4WHE3|PKS1_COCH4 Reducing polyketide synthase PKS1 OS=Cochliobolus heterostrophus (strain C4 / ATCC 48331 / race T) OX=665024 GN=PKS1 PE=3 SV=1	Colletotrichum_higginsianum__gene2179
Colletotrichum_higginsianum__gene2709	1	1436	OTHER	100	sp|A0R1E8|PKS5_MYCS2	6.37e-28	33.5	OTHER	sp|Q9NWU1|OXSM_HUMAN	8.17e-128	53.5	sp|Q9NWU1|OXSM_HUMAN 3-oxoacyl-[acyl-carrier-protein] synthase, mitochondrial OS=Homo sapiens OX=9606 GN=OXSM PE=1 SV=1	Colletotrichum_higginsianum__gene2709
Colletotrichum_higginsianum__gene3381	1	12837	hr_pks	100	BGC0002235__EHA55860.1	2.15e-283	73.9	hr_pks	sp|G4MVZ2|ACE1_MAGO7	0	67.7	sp|G4MVZ2|ACE1_MAGO7 Polyketide synthase-nonribosomal peptide synthetase ACE1 OS=Magnaporthe oryzae (strain 70-15 / ATCC MYA-4617 / FGSC 8958) OX=242507 GN=ACE1 PE=1 SV=1	Colletotrichum_higginsianum__gene3381
Colletotrichum_higginsianum__gene3524	1	201	OTHER	100	BGC0002244__KAF7526531.1	3.15e-17	55.4	OTHER	sp|Q5B0D0|APTA_EMENI	1.89e-14	54.1	sp|Q5B0D0|APTA_EMENI Non-reducing polyketide synthase aptA OS=Emericella nidulans (strain FGSC A4 / ATCC 38163 / CBS 112.46 / NRRL 194 / M139) OX=227321 GN=aptA PE=1 SV=1	Colletotrichum_higginsianum__gene3524
Colletotrichum_higginsianum__gene3525	1	795	OTHER	100	sp|A1D8I9|NSCA_NEOFI	3.79e-64	44.8	OTHER	sp|A1D8I9|NSCA_NEOFI	6.83e-61	44.8	sp|A1D8I9|NSCA_NEOFI Non-reducing polyketide synthase nscA OS=Neosartorya fischeri (strain ATCC 1020 / DSM 3700 / CBS 544.65 / FGSC A1164 / JCM 1740 / NRRL 181 / WB 181) OX=331117 GN=nscA PE=3 SV=1	Colletotrichum_higginsianum__gene3525
Colletotrichum_higginsianum__gene3526	1	493	OTHER	100	sp|C5FM57|NSCA_ARTOC	6.58e-52	61.7	OTHER	sp|C5FM57|NSCA_ARTOC	3.33e-49	61.7	sp|C5FM57|NSCA_ARTOC Non-reducing polyketide synthase nscA OS=Arthroderma otae (strain ATCC MYA-4605 / CBS 113480) OX=554155 GN=nscA PE=3 SV=1	Colletotrichum_higginsianum__gene3526
Colletotrichum_higginsianum__gene3558__renamed0067	1	7744	macrolactone_ancestral_clade	100	Colletotrichum_higginsianum__gene3558	0	98.7	macrolactone_ancestral_clade	sp|B3FWT3|HPM8_HYPSB	0	51.1	sp|B3FWT3|HPM8_HYPSB Reducing polyketide synthase hmp8 OS=Hypomyces subiculosus OX=193393 GN=hpm8 PE=1 SV=1	Colletotrichum_higginsianum__gene3558
Colletotrichum_higginsianum__gene3559	1	6953	OTHER	100	BGC0001245__AHV78247.1	3.77e-301	52.7	OTHER	sp|B3FWS8|HPM3_HYPSB	0	41.9	sp|B3FWS8|HPM3_HYPSB Non-reducing polyketide synthase hmp3 OS=Hypomyces subiculosus OX=193393 GN=hpm3 PE=1 SV=1	Colletotrichum_higginsianum__gene3559
Colletotrichum_higginsianum__gene3863	1	7685	OTHER	100	BGC0002483__AUW31052.1	7.97e-246	47.5	OTHER	sp|Q0CRQ5|5MOAS_ASPTN	0	34.5	sp|Q0CRQ5|5MOAS_ASPTN 5-methylorsellinic acid synthase OS=Aspergillus terreus (strain NIH 2624 / FGSC A1156) OX=341663 GN=ATEG_03629 PE=1 SV=1	Colletotrichum_higginsianum__gene3863
Colletotrichum_higginsianum__gene3957	1	8032	hr_pks	100	BGC0002234__EYE95336.1	5.2e-222	52.8	hr_pks	sp|G9N4B2|VIRA_HYPVG	0	49.4	sp|G9N4B2|VIRA_HYPVG Highly reducing polyketide synthase virA OS=Hypocrea virens (strain Gv29-8 / FGSC 10586) OX=413071 GN=virA PE=1 SV=1	Colletotrichum_higginsianum__gene3957
Colletotrichum_higginsianum__gene5343	1	12968	hr_pks	100	BGC0002235__EHA55875.1	0	68.3	hr_pks	sp|A0A4P8WAE5|PYIS_MAGGR	0	41.6	sp|A0A4P8WAE5|PYIS_MAGGR Polyketide synthase-nonribosomal peptide synthetase pyiS OS=Magnaporthe grisea OX=148305 GN=pyiS PE=3 SV=1	Colletotrichum_higginsianum__gene5343
Colletotrichum_higginsianum__gene5344	1	765	hr_pks	100	BGC0001565__ATQ39432.1	1.62e-104	69.3	hr_pks	sp|A0A179H2I8|LCSB_PURLI	9.67e-79	57.6	sp|A0A179H2I8|LCSB_PURLI Highly reducing polyketide synthase lcsB OS=Purpureocillium lilacinum OX=33203 GN=lcsB PE=2 SV=1	Colletotrichum_higginsianum__gene5344
Colletotrichum_higginsianum__gene5468	1	6628	OTHER	100	BGC0001923__BBF25315.1	0	71.7	OTHER	sp|A0A455R5P9|ASCC_ACREG	0	59.8	sp|A0A455R5P9|ASCC_ACREG Non-reducing polyketide synthase ascC OS=Acremonium egyptiacum OX=749675 GN=ascC PE=1 SV=1	Colletotrichum_higginsianum__gene5468
Colletotrichum_higginsianum__gene5472	1	6675	OTHER	100	BGC0002429__OBR09781.1	0	100	OTHER	sp|A0A1B7YCC9|DPCHA_COLHI	0	100	sp|A0A1B7YCC9|DPCHA_COLHI Non-reducing polyketide synthase dpchA OS=Colletotrichum higginsianum (strain IMI 349063) OX=759273 GN=dpchA PE=1 SV=1	Colletotrichum_higginsianum__gene5472
Colletotrichum_higginsianum__gene6244	1	6613	OTHER	100	BGC0001541__PIB02405.1	0	67.7	OTHER	sp|A0A2G5IC96|CTB1_CERBT	0	52.9	sp|A0A2G5IC96|CTB1_CERBT Non-reducing polyketide synthase CTB1 OS=Cercospora beticola OX=122368 GN=CTB1 PE=3 SV=1	Colletotrichum_higginsianum__gene6244
Colletotrichum_higginsianum__gene6315	1	7375	hr_pks	100	sp|A0A0N0DCA3|DEP5_FUSLA	1.94e-261	89.4	hr_pks	sp|D2E9X0|DEP5_ALTBR	0	58.7	sp|D2E9X0|DEP5_ALTBR Reducing polyketide synthase DEP5 OS=Alternaria brassicicola OX=29001 GN=DEP5 PE=2 SV=1	Colletotrichum_higginsianum__gene6315
Colletotrichum_higginsianum__gene6534	1	8403	hr_pks	100	BGC0002222__BBU42026.1	3.18e-158	38.6	hr_pks	sp|N4WHE3|PKS1_COCH4	0	34	sp|N4WHE3|PKS1_COCH4 Reducing polyketide synthase PKS1 OS=Cochliobolus heterostrophus (strain C4 / ATCC 48331 / race T) OX=665024 GN=PKS1 PE=3 SV=1	Colletotrichum_higginsianum__gene6534
Colletotrichum_higginsianum__gene7082	1	9692	hr_pks	100	BGC0001252__BAN19720.1	2.64e-77	46.9	hr_pks	sp|P9WEV0|VALA_ASPTE	0	34.8	sp|P9WEV0|VALA_ASPTE Highly reducing polyketide synthase valA OS=Aspergillus terreus OX=33178 GN=valA PE=3 SV=1	Colletotrichum_higginsianum__gene7082
Colletotrichum_higginsianum__gene7286	1	7116	OTHER	100	BGC0001541__PIB02405.1	0	57.3	OTHER	sp|A0A2G5IC96|CTB1_CERBT	0	52.2	sp|A0A2G5IC96|CTB1_CERBT Non-reducing polyketide synthase CTB1 OS=Cercospora beticola OX=122368 GN=CTB1 PE=3 SV=1	Colletotrichum_higginsianum__gene7286
Colletotrichum_higginsianum__gene7576	1	7666	hr_pks	100	trichoderma_longibrachiatum_atcc_18648_gca_003025155__gene___M440DRAFT_1102985	1.62e-203	41.7	hr_pks	sp|Q5KTM9|ALT5_ALTSO	1.88e-134	35.7	sp|Q5KTM9|ALT5_ALTSO Highly reducing polyketide synthase alt5 OS=Alternaria solani OX=48100 GN=alt5 PE=1 SV=1	Colletotrichum_higginsianum__gene7576
Colletotrichum_higginsianum__gene8366	1	7034	hr_pks	100	BGC0001358__OAQ83765.1	1.6e-108	47.3	hr_pks	sp|A0A179H0J7|LCSC_PURLI	2.72e-99	47.4	sp|A0A179H0J7|LCSC_PURLI Highly reducing polyketide synthase lcsC OS=Purpureocillium lilacinum OX=33203 GN=lcsC PE=2 SV=1	Colletotrichum_higginsianum__gene8366
Colletotrichum_higginsianum__gene8916	1	6809	OTHER	100	BGC0002161__ETS82099.1	0	84.1	OTHER	sp|W3X7U2|PFMAE_PESFW	0	71.5	sp|W3X7U2|PFMAE_PESFW Conidial pigment polyketide synthase PfmaE OS=Pestalotiopsis fici (strain W106-1 / CGMCC3.15140) OX=1229662 GN=PfmaE PE=2 SV=1	Colletotrichum_higginsianum__gene8916
Colletotrichum_higginsianum__gene9228	1	7303	hr_pks	100	Colletotrichum_plurivorum__gene-CPLU01_12416	0	85.8	hr_pks	sp|G3XMD1|AZAB_ASPNA	1.2e-274	30.4	sp|G3XMD1|AZAB_ASPNA Highly reducing polyketide synthase azaB OS=Aspergillus niger (strain ATCC 1015 / CBS 113.46 / FGSC A1144 / LSHB Ac4 / NCTC 3858a / NRRL 328 / USDA 3528.7) OX=380704 GN=azaB PE=1 SV=1	Colletotrichum_higginsianum__gene9228
Colletotrichum_higginsianum__gene9326	1	1071	OTHER	100	BGC0002212__ESK96613.1	3.51e-13	25.9	OTHER	sp|Q9R9J2|FENF_BACIU	4.86e-21	27.7	sp|Q9R9J2|FENF_BACIU Malonyl CoA-acyl carrier protein transacylase OS=Bacillus subtilis OX=1423 GN=fenF PE=1 SV=1	Colletotrichum_higginsianum__gene9326
Colletotrichum_higginsianum__gene9685	1	8335	hr_pks	100	BGC0001600__CEF75886.1	4.89e-177	60.8	hr_pks	sp|I1S166|FSL1_GIBZE	0	37.3	sp|I1S166|FSL1_GIBZE Fusarielin synthase FSL1 OS=Gibberella zeae (strain ATCC MYA-4620 / CBS 123657 / FGSC 9075 / NRRL 31084 / PH-1) OX=229533 GN=FSL1 PE=2 SV=1	Colletotrichum_higginsianum__gene9685
Colletotrichum_higginsianum__gene9711	1	5106	hr_pks	99.9	BGC0000968__CAO91861.1	1.22e-42	44.9	hr_pks	sp|Q5ATG8|APDA_EMENI	1.59e-70	37.4	sp|Q5ATG8|APDA_EMENI Hybrid PKS-NRPS synthetase apdA OS=Emericella nidulans (strain FGSC A4 / ATCC 38163 / CBS 112.46 / NRRL 194 / M139) OX=227321 GN=apdA PE=1 SV=1	Colletotrichum_higginsianum__gene9711
Colletotrichum_higginsianum__gene9766	1	6425	OUTLIER	*	None	None	None	None	sp|P34229|FAS1_YARLI	0	37.9	sp|P34229|FAS1_YARLI Fatty acid synthase subunit beta OS=Yarrowia lipolytica (strain CLIB 122 / E 150) OX=284591 GN=FAS1 PE=3 SV=2	Colletotrichum_higginsianum__gene9766
Colletotrichum_musicola__gene-CMUS01_00567__renamed0069	1	7915	hr_pks	100	Colletotrichum_musicola__gene-CMUS01_00567	0	84.1	hr_pks	sp|Q5KTM9|ALT5_ALTSO	0	71.1	sp|Q5KTM9|ALT5_ALTSO Highly reducing polyketide synthase alt5 OS=Alternaria solani OX=48100 GN=alt5 PE=1 SV=1	Colletotrichum_musicola__gene-CMUS01_00567
Colletotrichum_musicola__gene-CMUS01_02838	1	6573	OTHER	100	BGC0001923__BBF25315.1	0	71	OTHER	sp|A0A455R5P9|ASCC_ACREG	0	62.5	sp|A0A455R5P9|ASCC_ACREG Non-reducing polyketide synthase ascC OS=Acremonium egyptiacum OX=749675 GN=ascC PE=1 SV=1	Colletotrichum_musicola__gene-CMUS01_02838
Colletotrichum_musicola__gene-CMUS01_02841	1	6857	OTHER	100	BGC0002429__OBR09781.1	0	72.3	OTHER	sp|A0A1B7YCC9|DPCHA_COLHI	0	65.9	sp|A0A1B7YCC9|DPCHA_COLHI Non-reducing polyketide synthase dpchA OS=Colletotrichum higginsianum (strain IMI 349063) OX=759273 GN=dpchA PE=1 SV=1	Colletotrichum_musicola__gene-CMUS01_02841
Colletotrichum_musicola__gene-CMUS01_03739	1	7971	hr_pks	100	BGC0002525__BBU37368.1	2.36e-133	34.3	hr_pks	sp|A0A6S5ZY48|G433_FUSSX	0	36.6	sp|A0A6S5ZY48|G433_FUSSX Highly reducing polyketide synthase g433 OS=Fusarium sp. OX=29916 GN=g433 PE=2 SV=1	Colletotrichum_musicola__gene-CMUS01_03739
Colletotrichum_musicola__gene-CMUS01_04436	1	8475	hr_pks	100	Venustampulla_echinocandica__gene-BP5553_09895	1.36e-126	58.3	hr_pks	sp|G3XMD1|AZAB_ASPNA	0	41.5	sp|G3XMD1|AZAB_ASPNA Highly reducing polyketide synthase azaB OS=Aspergillus niger (strain ATCC 1015 / CBS 113.46 / FGSC A1144 / LSHB Ac4 / NCTC 3858a / NRRL 328 / USDA 3528.7) OX=380704 GN=azaB PE=1 SV=1	Colletotrichum_musicola__gene-CMUS01_04436
Colletotrichum_musicola__gene-CMUS01_04788	1	8120	hr_pks	100	Ophiocordyceps_sinensis__gene-G6O67_007912	2.54e-234	47.6	hr_pks	sp|Q5KTM9|ALT5_ALTSO	3.29e-240	34.9	sp|Q5KTM9|ALT5_ALTSO Highly reducing polyketide synthase alt5 OS=Alternaria solani OX=48100 GN=alt5 PE=1 SV=1	Colletotrichum_musicola__gene-CMUS01_04788
Colletotrichum_musicola__gene-CMUS01_05848	1	6716	OTHER	100	BGC0002161__ETS82099.1	0	84.2	OTHER	sp|W3X7U2|PFMAE_PESFW	0	71	sp|W3X7U2|PFMAE_PESFW Conidial pigment polyketide synthase PfmaE OS=Pestalotiopsis fici (strain W106-1 / CGMCC3.15140) OX=1229662 GN=PfmaE PE=2 SV=1	Colletotrichum_musicola__gene-CMUS01_05848
Colletotrichum_musicola__gene-CMUS01_06221	1	1441	OTHER	100	sp|Q07017|OL56_STRAT__1	1.57e-27	33.6	OTHER	sp|P56902|FABF_RHIME	6.58e-126	50.1	sp|P56902|FABF_RHIME 3-oxoacyl-[acyl-carrier-protein] synthase 2 OS=Rhizobium meliloti (strain 1021) OX=266834 GN=fabF PE=3 SV=2	Colletotrichum_musicola__gene-CMUS01_06221
Colletotrichum_musicola__gene-CMUS01_06510	1	7976	hr_pks	100	BGC0001339__AMY15068.1	1.74e-125	34.6	hr_pks	sp|A0A6S5ZY48|G433_FUSSX	4.08e-220	33.4	sp|A0A6S5ZY48|G433_FUSSX Highly reducing polyketide synthase g433 OS=Fusarium sp. OX=29916 GN=g433 PE=2 SV=1	Colletotrichum_musicola__gene-CMUS01_06510
Colletotrichum_musicola__gene-CMUS01_06802	1	6361	OUTLIER	*	None	None	None	None	sp|P34229|FAS1_YARLI	0	58.3	sp|P34229|FAS1_YARLI Fatty acid synthase subunit beta OS=Yarrowia lipolytica (strain CLIB 122 / E 150) OX=284591 GN=FAS1 PE=3 SV=2	Colletotrichum_musicola__gene-CMUS01_06802
Colletotrichum_musicola__gene-CMUS01_06846	1	2677	hr_pks	100	BGC0001358__OAQ83765.1	2.73e-204	43.9	hr_pks	sp|A0A179H0J7|LCSC_PURLI	1.38e-189	43.1	sp|A0A179H0J7|LCSC_PURLI Highly reducing polyketide synthase lcsC OS=Purpureocillium lilacinum OX=33203 GN=lcsC PE=2 SV=1	Colletotrichum_musicola__gene-CMUS01_06846
Colletotrichum_musicola__gene-CMUS01_07534	1	8733	hr_pks	100	colletotrichum_graminicola__gene___GLRG_01860	2.83e-140	89.3	hr_pks	sp|G4NEB1|NEC1_MAGO7	0	44.7	sp|G4NEB1|NEC1_MAGO7 Highly reducing polyketide synthase NEC1 OS=Magnaporthe oryzae (strain 70-15 / ATCC MYA-4617 / FGSC 8958) OX=242507 GN=NEC1 PE=1 SV=1	Colletotrichum_musicola__gene-CMUS01_07534
Colletotrichum_musicola__gene-CMUS01_07612	1	7098	hr_pks	100	Colletotrichum_plurivorum__gene-CPLU01_12416	0	99.5	hr_pks	sp|G3XMD1|AZAB_ASPNA	1.88e-253	29.8	sp|G3XMD1|AZAB_ASPNA Highly reducing polyketide synthase azaB OS=Aspergillus niger (strain ATCC 1015 / CBS 113.46 / FGSC A1144 / LSHB Ac4 / NCTC 3858a / NRRL 328 / USDA 3528.7) OX=380704 GN=azaB PE=1 SV=1	Colletotrichum_musicola__gene-CMUS01_07612
Colletotrichum_musicola__gene-CMUS01_08067__renamed0070	1	7421	macrolactone_ancestral_clade	100	Colletotrichum_musicola__gene-CMUS01_08067	0	100	macrolactone_ancestral_clade	sp|B3FWT3|HPM8_HYPSB	0	60.3	sp|B3FWT3|HPM8_HYPSB Reducing polyketide synthase hmp8 OS=Hypomyces subiculosus OX=193393 GN=hpm8 PE=1 SV=1	Colletotrichum_musicola__gene-CMUS01_08067
Colletotrichum_musicola__gene-CMUS01_09191	1	1699	hr_pks	100	sp|A0A084API3|SAT13_STACB	5.45e-66	39.7	hr_pks	sp|A0A1B4XBH3|SDNO_SORAA	2.64e-59	41.3	sp|A0A1B4XBH3|SDNO_SORAA Highly reducing polyketide synthase sdnO OS=Sordaria araneosa OX=573841 GN=sdnO PE=3 SV=1	Colletotrichum_musicola__gene-CMUS01_09191
Colletotrichum_musicola__gene-CMUS01_09192	1	693	hr_pks	100	helicocarpus_griseus_uamh5409_gca_002573585__gene___AJ79_09779	4.77e-85	57.6	hr_pks	sp|A0A1B4XBH3|SDNO_SORAA	1.07e-74	56	sp|A0A1B4XBH3|SDNO_SORAA Highly reducing polyketide synthase sdnO OS=Sordaria araneosa OX=573841 GN=sdnO PE=3 SV=1	Colletotrichum_musicola__gene-CMUS01_09192
Colletotrichum_musicola__gene-CMUS01_09199	1	8166	hr_pks	100	BGC0002729__EAA36364.1	1.62e-118	31.9	hr_pks	sp|G4N296|PKS19_MAGO7	5.47e-130	33.3	sp|G4N296|PKS19_MAGO7 Highly reducing polyketide synthase 19 OS=Magnaporthe oryzae (strain 70-15 / ATCC MYA-4617 / FGSC 8958) OX=242507 GN=PKS19 PE=2 SV=1	Colletotrichum_musicola__gene-CMUS01_09199
Colletotrichum_musicola__gene-CMUS01_09245	1	5211	hr_pks	100	trichoderma_longibrachiatum_atcc_18648_gca_003025155__gene___M440DRAFT_1102985	9.63e-241	43.2	hr_pks	sp|C8VJR7|ALNA_EMENI	1.15e-213	31.8	sp|C8VJR7|ALNA_EMENI Highly reducing polyketide synthase alnA OS=Emericella nidulans (strain FGSC A4 / ATCC 38163 / CBS 112.46 / NRRL 194 / M139) OX=227321 GN=alnA PE=1 SV=1	Colletotrichum_musicola__gene-CMUS01_09245
Colletotrichum_musicola__gene-CMUS01_09767	1	8261	OTHER	100	BGC0000027__AGN71604.1	0	61.3	OTHER	sp|A2QTE9|EPAA_ASPNC	0	47.3	sp|A2QTE9|EPAA_ASPNC Non-reducing polyketide synthase epaA OS=Aspergillus niger (strain CBS 513.88 / FGSC A1513) OX=425011 GN=epaA PE=3 SV=1	Colletotrichum_musicola__gene-CMUS01_09767
Colletotrichum_musicola__gene-CMUS01_10708	1	6205	hr_pks	100	BGC0001358__OAQ83760.1	1.73e-90	44.7	hr_pks	sp|A0A179H2I8|LCSB_PURLI	2.02e-141	38.2	sp|A0A179H2I8|LCSB_PURLI Highly reducing polyketide synthase lcsB OS=Purpureocillium lilacinum OX=33203 GN=lcsB PE=2 SV=1	Colletotrichum_musicola__gene-CMUS01_10708
Colletotrichum_musicola__gene-CMUS01_11285	1	7571	hr_pks	100	sp|A0A2Z5TM64|HIMA_ASPJA	1.31e-304	54.9	hr_pks	sp|A0A2Z5TM64|HIMA_ASPJA	0	41.1	sp|A0A2Z5TM64|HIMA_ASPJA Polyketide synthase-nonribosomal peptide synthetase hybrid himA OS=Aspergillus japonicus OX=34381 GN=himA PE=3 SV=1	Colletotrichum_musicola__gene-CMUS01_11285
Colletotrichum_musicola__gene-CMUS01_11531	1	2273	hr_pks	100	BGC0001141__AIA58899.1	1.95e-84	33.5	hr_pks	sp|A0A068ABB7|BREF7_EUPBR	2.3e-79	33.5	sp|A0A068ABB7|BREF7_EUPBR Highly reducing polyketide synthase OS=Eupenicillium brefeldianum OX=1131482 GN=Bref-PKS PE=1 SV=1	Colletotrichum_musicola__gene-CMUS01_11531
Colletotrichum_musicola__gene-CMUS01_11713	1	7719	hr_pks	100	BGC0002525__BBU37368.1	2.48e-297	54.8	hr_pks	sp|A0A6S5ZY48|G433_FUSSX	0	47.6	sp|A0A6S5ZY48|G433_FUSSX Highly reducing polyketide synthase g433 OS=Fusarium sp. OX=29916 GN=g433 PE=2 SV=1	Colletotrichum_musicola__gene-CMUS01_11713
Colletotrichum_musicola__gene-CMUS01_12229	1	7503	hr_pks	100	lentithecium_fluviatile__estExt_Genewise1Plus.C_2_t10077	1.79e-163	44.5	hr_pks	sp|C8VJR7|ALNA_EMENI	0	34.9	sp|C8VJR7|ALNA_EMENI Highly reducing polyketide synthase alnA OS=Emericella nidulans (strain FGSC A4 / ATCC 38163 / CBS 112.46 / NRRL 194 / M139) OX=227321 GN=alnA PE=1 SV=1	Colletotrichum_musicola__gene-CMUS01_12229
Colletotrichum_musicola__gene-CMUS01_12232	1	8006	hr_pks	100	Colletotrichum_scovillei__gene-HER10_EVM0001067	0	66.6	hr_pks	sp|Q86ZD9|SQTKS_PHOSC	0	40.9	sp|Q86ZD9|SQTKS_PHOSC Squalestatin tetraketide synthase OS=Phoma sp. (strain C2932) OX=86977 GN=pks1 PE=1 SV=1	Colletotrichum_musicola__gene-CMUS01_12232
Colletotrichum_musicola__gene-CMUS01_12390	1	1383	OTHER	100	BGC0002212__ESK96613.1	1.9e-14	24.6	OTHER	sp|A7Z4Y0|BAEE_BACVZ	1.07e-26	32.2	sp|A7Z4Y0|BAEE_BACVZ Polyketide biosynthesis protein BaeE OS=Bacillus velezensis (strain DSM 23117 / BGSC 10A6 / LMG 26770 / FZB42) OX=326423 GN=baeE PE=1 SV=1	Colletotrichum_musicola__gene-CMUS01_12390
Colletotrichum_musicola__gene-CMUS01_12595	1	12161	hr_pks	100	BGC0002230__QPC57090.1	6.17e-292	53.6	hr_pks	sp|B8NJG3|LEPA_ASPFN	0	33.7	sp|B8NJG3|LEPA_ASPFN Hybrid PKS-NRPS synthetase lepA OS=Aspergillus flavus (strain ATCC 200026 / FGSC A1120 / IAM 13836 / NRRL 3357 / JCM 12722 / SRRC 167) OX=332952 GN=lepA PE=3 SV=1	Colletotrichum_musicola__gene-CMUS01_12595
Colletotrichum_musicola__gene-CMUS01_12841	1	8273	hr_pks	100	aspergillus_sydowii_cbs_593_65_gca_001890705__gene___ASPSYDRAFT_62430	2.52e-168	43.8	hr_pks	sp|C8VJR7|ALNA_EMENI	0	32.3	sp|C8VJR7|ALNA_EMENI Highly reducing polyketide synthase alnA OS=Emericella nidulans (strain FGSC A4 / ATCC 38163 / CBS 112.46 / NRRL 194 / M139) OX=227321 GN=alnA PE=1 SV=1	Colletotrichum_musicola__gene-CMUS01_12841
Colletotrichum_musicola__gene-CMUS01_12916	1	632	hr_pks	100	BGC0002233__EHK18438.1	1.93e-51	63.2	hr_pks	sp|G9N4B2|VIRA_HYPVG	8.53e-50	62.5	sp|G9N4B2|VIRA_HYPVG Highly reducing polyketide synthase virA OS=Hypocrea virens (strain Gv29-8 / FGSC 10586) OX=413071 GN=virA PE=1 SV=1	Colletotrichum_musicola__gene-CMUS01_12916
Colletotrichum_musicola__gene-CMUS01_13439	1	982	hr_pks	100	sp|P0DUK1|PSPA_PENSO	1.23e-59	55	hr_pks	sp|P0DUK1|PSPA_PENSO	2.69e-59	53.9	sp|P0DUK1|PSPA_PENSO Highly reducing polyketide synthase pspA OS=Penicillium soppii OX=69789 GN=pspA PE=3 SV=1	Colletotrichum_musicola__gene-CMUS01_13439
Colletotrichum_musicola__gene-CMUS01_14045	1	7016	hr_pks	100	sp|P0DUK1|PSPA_PENSO	2.16e-67	34	hr_pks	sp|P0DUK1|PSPA_PENSO	1.66e-239	30.2	sp|P0DUK1|PSPA_PENSO Highly reducing polyketide synthase pspA OS=Penicillium soppii OX=69789 GN=pspA PE=3 SV=1	Colletotrichum_musicola__gene-CMUS01_14045
Colletotrichum_musicola__gene-CMUS01_14071	1	8606	hr_pks	100	Pyrenophora_seminiperda__gene-GMOD_00000948	1.66e-76	41.5	hr_pks	sp|G3XMD1|AZAB_ASPNA	1.27e-152	25.8	sp|G3XMD1|AZAB_ASPNA Highly reducing polyketide synthase azaB OS=Aspergillus niger (strain ATCC 1015 / CBS 113.46 / FGSC A1144 / LSHB Ac4 / NCTC 3858a / NRRL 328 / USDA 3528.7) OX=380704 GN=azaB PE=1 SV=1	Colletotrichum_musicola__gene-CMUS01_14071
Colletotrichum_musicola__gene-CMUS01_14162	1	5083	hr_pks	100	aspergillus_calidoustus_gca_001511075__gene___ASPCAL07647	2.11e-91	41.4	hr_pks	sp|G4NEB1|NEC1_MAGO7	3.42e-76	25.9	sp|G4NEB1|NEC1_MAGO7 Highly reducing polyketide synthase NEC1 OS=Magnaporthe oryzae (strain 70-15 / ATCC MYA-4617 / FGSC 8958) OX=242507 GN=NEC1 PE=1 SV=1	Colletotrichum_musicola__gene-CMUS01_14162
Colletotrichum_musicola__gene-CMUS01_14221	1	6503	OTHER	100	BGC0000076__ACD39753.1	0	60.8	OTHER	sp|B3FWS8|HPM3_HYPSB	0	53.3	sp|B3FWS8|HPM3_HYPSB Non-reducing polyketide synthase hmp3 OS=Hypomyces subiculosus OX=193393 GN=hpm3 PE=1 SV=1	Colletotrichum_musicola__gene-CMUS01_14221
Colletotrichum_musicola__gene-CMUS01_14320	1	6636	hr_pks	100	BGC0001866__XP_028481819.1	8.16e-117	39.1	hr_pks	sp|A0A179H2I8|LCSB_PURLI	1.17e-104	37.7	sp|A0A179H2I8|LCSB_PURLI Highly reducing polyketide synthase lcsB OS=Purpureocillium lilacinum OX=33203 GN=lcsB PE=2 SV=1	Colletotrichum_musicola__gene-CMUS01_14320
Colletotrichum_musicola__gene-CMUS01_14446	1	7280	hr_pks	100	BGC0001122__EAU38971.1	6.58e-194	41.9	hr_pks	sp|A0A1L9WQM9|ACRA_ASPA1	1.2e-227	36.3	sp|A0A1L9WQM9|ACRA_ASPA1 Highly reducing polyketide synthase acrA OS=Aspergillus aculeatus (strain ATCC 16872 / CBS 172.66 / WB 5094) OX=690307 GN=acrA PE=2 SV=1	Colletotrichum_musicola__gene-CMUS01_14446
Colletotrichum_musicola__gene-CMUS01_15144	1	9544	hr_pks	100	BGC0000098__ABA02239.1	8.24e-251	50.3	hr_pks	sp|Q3S2T9|MOKA_MONPI	0	44.9	sp|Q3S2T9|MOKA_MONPI Lovastatin nonaketide synthase mokA OS=Monascus pilosus OX=89488 GN=mokA PE=1 SV=1	Colletotrichum_musicola__gene-CMUS01_15144
Colletotrichum_musicola__gene-CMUS01_15216	1	6946	hr_pks	100	sp|P0DUK1|PSPA_PENSO	3.51e-246	64.5	hr_pks	sp|P0DUK1|PSPA_PENSO	0	41.1	sp|P0DUK1|PSPA_PENSO Highly reducing polyketide synthase pspA OS=Penicillium soppii OX=69789 GN=pspA PE=3 SV=1	Colletotrichum_musicola__gene-CMUS01_15216
Colletotrichum_musicola__gene-CMUS01_15498	1	7476	hr_pks	100	BGC0002234__EYE95336.1	1.33e-267	55.6	hr_pks	sp|G9N4B2|VIRA_HYPVG	0	51.3	sp|G9N4B2|VIRA_HYPVG Highly reducing polyketide synthase virA OS=Hypocrea virens (strain Gv29-8 / FGSC 10586) OX=413071 GN=virA PE=1 SV=1	Colletotrichum_musicola__gene-CMUS01_15498
Colletotrichum_musicola__gene-CMUS01_15837	1	5352	OTHER	100	BGC0000160__EAU32819.1	0	65.3	OTHER	sp|Q0CJ59|ATX_ASPTN	0	58.9	sp|Q0CJ59|ATX_ASPTN 6-methylsalicylic acid synthase OS=Aspergillus terreus (strain NIH 2624 / FGSC A1156) OX=341663 GN=atX PE=1 SV=1	Colletotrichum_musicola__gene-CMUS01_15837
Colletotrichum_musicola__gene-CMUS01_15950	1	5688	hr_pks	92.6	BGC0001035__EPE34340.1	3.6e-16	40.7	hr_pks	sp|A0A179H0J7|LCSC_PURLI	2.89e-252	35.1	sp|A0A179H0J7|LCSC_PURLI Highly reducing polyketide synthase lcsC OS=Purpureocillium lilacinum OX=33203 GN=lcsC PE=2 SV=1	Colletotrichum_musicola__gene-CMUS01_15950
Colletotrichum_musicola__gene-CMUS01_16194	1	5003	OTHER	100	BGC0001338__ALI92655.1	2.36e-257	45.5	OTHER	sp|Q0CRQ5|5MOAS_ASPTN	7.15e-298	36.8	sp|Q0CRQ5|5MOAS_ASPTN 5-methylorsellinic acid synthase OS=Aspergillus terreus (strain NIH 2624 / FGSC A1156) OX=341663 GN=ATEG_03629 PE=1 SV=1	Colletotrichum_musicola__gene-CMUS01_16194
Colletotrichum_plurivorum__gene-CPLU01_01681	1	6715	OTHER	100	BGC0002161__ETS82099.1	0	84.2	OTHER	sp|W3X7U2|PFMAE_PESFW	0	70.7	sp|W3X7U2|PFMAE_PESFW Conidial pigment polyketide synthase PfmaE OS=Pestalotiopsis fici (strain W106-1 / CGMCC3.15140) OX=1229662 GN=PfmaE PE=2 SV=1	Colletotrichum_plurivorum__gene-CPLU01_01681
Colletotrichum_plurivorum__gene-CPLU01_02121	1	1383	OTHER	100	BGC0002212__ESK96613.1	5.83e-14	24.3	OTHER	sp|A7Z4Y0|BAEE_BACVZ	5.95e-27	32.2	sp|A7Z4Y0|BAEE_BACVZ Polyketide biosynthesis protein BaeE OS=Bacillus velezensis (strain DSM 23117 / BGSC 10A6 / LMG 26770 / FZB42) OX=326423 GN=baeE PE=1 SV=1	Colletotrichum_plurivorum__gene-CPLU01_02121
Colletotrichum_plurivorum__gene-CPLU01_02193	1	7399	hr_pks	100	trichoderma_longibrachiatum_atcc_18648_gca_003025155__gene___M440DRAFT_1102985	1.06e-235	43.1	hr_pks	sp|A0A4P8DJV2|DMXL2_CRYX8	3.22e-228	30	sp|A0A4P8DJV2|DMXL2_CRYX8 Highly reducing polyketide synthase dmxL2 OS=Cryptosporiopsis sp. (strain 8999) OX=2572248 GN=dmxL2 PE=3 SV=1	Colletotrichum_plurivorum__gene-CPLU01_02193
Colletotrichum_plurivorum__gene-CPLU01_02746	1	1441	OTHER	100	sp|Q07017|OL56_STRAT__1	2.8e-27	33.6	OTHER	sp|P56902|FABF_RHIME	1.06e-124	50.1	sp|P56902|FABF_RHIME 3-oxoacyl-[acyl-carrier-protein] synthase 2 OS=Rhizobium meliloti (strain 1021) OX=266834 GN=fabF PE=3 SV=2	Colletotrichum_plurivorum__gene-CPLU01_02746
Colletotrichum_plurivorum__gene-CPLU01_03275	1	9700	hr_pks	100	BGC0000098__ABA02239.1	1.18e-249	49.7	hr_pks	sp|Q9Y8A5|LOVB_ASPTE	0	43.8	sp|Q9Y8A5|LOVB_ASPTE Lovastatin nonaketide synthase, polyketide synthase component OS=Aspergillus terreus OX=33178 GN=lovB PE=1 SV=1	Colletotrichum_plurivorum__gene-CPLU01_03275
Colletotrichum_plurivorum__gene-CPLU01_03739	1	1293	macrolactone_ancestral_clade	100	Colletotrichum_musicola__gene-CMUS01_08067	4.58e-172	68.3	macrolactone_ancestral_clade	sp|B3FWT3|HPM8_HYPSB	3.78e-132	55.6	sp|B3FWT3|HPM8_HYPSB Reducing polyketide synthase hmp8 OS=Hypomyces subiculosus OX=193393 GN=hpm8 PE=1 SV=1	Colletotrichum_plurivorum__gene-CPLU01_03739
Colletotrichum_plurivorum__gene-CPLU01_03740	1	1857	macrolactone_ancestral_clade	100	Colletotrichum_musicola__gene-CMUS01_08067	8.58e-249	97.3	macrolactone_ancestral_clade	sp|A0A098D8A0|ZEA2_GIBZE	9.35e-234	54.4	sp|A0A098D8A0|ZEA2_GIBZE Highly reducing polyketide synthase ZEA2 OS=Gibberella zeae (strain ATCC MYA-4620 / CBS 123657 / FGSC 9075 / NRRL 31084 / PH-1) OX=229533 GN=ZEA2 PE=2 SV=1	Colletotrichum_plurivorum__gene-CPLU01_03740
Colletotrichum_plurivorum__gene-CPLU01_04951	1	8353	hr_pks	100	BGC0002525__BBU37368.1	1.26e-87	32.5	hr_pks	sp|A0A179H0J7|LCSC_PURLI	0	42.4	sp|A0A179H0J7|LCSC_PURLI Highly reducing polyketide synthase lcsC OS=Purpureocillium lilacinum OX=33203 GN=lcsC PE=2 SV=1	Colletotrichum_plurivorum__gene-CPLU01_04951
Colletotrichum_plurivorum__gene-CPLU01_05303	1	7837	hr_pks	100	BGC0002525__BBU37368.1	1.63e-293	54.8	hr_pks	sp|A0A6S5ZY48|G433_FUSSX	0	47.5	sp|A0A6S5ZY48|G433_FUSSX Highly reducing polyketide synthase g433 OS=Fusarium sp. OX=29916 GN=g433 PE=2 SV=1	Colletotrichum_plurivorum__gene-CPLU01_05303
Colletotrichum_plurivorum__gene-CPLU01_05310	1	7851	OTHER	100	BGC0001338__ALI92655.1	2.02e-247	45.3	OTHER	sp|Q5AZ32|PKBA_EMENI	0	33.9	sp|Q5AZ32|PKBA_EMENI Non-reducing polyketide synthase pkbA OS=Emericella nidulans (strain FGSC A4 / ATCC 38163 / CBS 112.46 / NRRL 194 / M139) OX=227321 GN=pkbA PE=1 SV=1	Colletotrichum_plurivorum__gene-CPLU01_05310
Colletotrichum_plurivorum__gene-CPLU01_05674	1	7838	hr_pks	100	sp|P0DUK1|PSPA_PENSO	3.25e-241	63.7	hr_pks	sp|P0DUK1|PSPA_PENSO	0	46.9	sp|P0DUK1|PSPA_PENSO Highly reducing polyketide synthase pspA OS=Penicillium soppii OX=69789 GN=pspA PE=3 SV=1	Colletotrichum_plurivorum__gene-CPLU01_05674
Colletotrichum_plurivorum__gene-CPLU01_05825	1	6361	OUTLIER	*	None	None	None	None	sp|P34229|FAS1_YARLI	0	58.3	sp|P34229|FAS1_YARLI Fatty acid synthase subunit beta OS=Yarrowia lipolytica (strain CLIB 122 / E 150) OX=284591 GN=FAS1 PE=3 SV=2	Colletotrichum_plurivorum__gene-CPLU01_05825
Colletotrichum_plurivorum__gene-CPLU01_05837	1	7965	hr_pks	100	sp|P0DUK1|PSPA_PENSO	2.62e-121	33.1	hr_pks	sp|P0DUK1|PSPA_PENSO	0	31.4	sp|P0DUK1|PSPA_PENSO Highly reducing polyketide synthase pspA OS=Penicillium soppii OX=69789 GN=pspA PE=3 SV=1	Colletotrichum_plurivorum__gene-CPLU01_05837
Colletotrichum_plurivorum__gene-CPLU01_05990	1	8356	hr_pks	100	BGC0001122__EAU38971.1	1.02e-159	45.9	hr_pks	sp|A0A1L9WQM9|ACRA_ASPA1	4.98e-200	37.8	sp|A0A1L9WQM9|ACRA_ASPA1 Highly reducing polyketide synthase acrA OS=Aspergillus aculeatus (strain ATCC 16872 / CBS 172.66 / WB 5094) OX=690307 GN=acrA PE=2 SV=1	Colletotrichum_plurivorum__gene-CPLU01_05990
Colletotrichum_plurivorum__gene-CPLU01_05993	1	8259	hr_pks	100	aspergillus_sydowii_cbs_593_65_gca_001890705__gene___ASPSYDRAFT_62430	5.98e-146	34.9	hr_pks	sp|C8VJR7|ALNA_EMENI	0	30.4	sp|C8VJR7|ALNA_EMENI Highly reducing polyketide synthase alnA OS=Emericella nidulans (strain FGSC A4 / ATCC 38163 / CBS 112.46 / NRRL 194 / M139) OX=227321 GN=alnA PE=1 SV=1	Colletotrichum_plurivorum__gene-CPLU01_05993
Colletotrichum_plurivorum__gene-CPLU01_06267	1	8481	hr_pks	99.9	Venustampulla_echinocandica__gene-BP5553_09895	1.34e-116	55.4	hr_pks	sp|G3XMD1|AZAB_ASPNA	1.25e-274	35.8	sp|G3XMD1|AZAB_ASPNA Highly reducing polyketide synthase azaB OS=Aspergillus niger (strain ATCC 1015 / CBS 113.46 / FGSC A1144 / LSHB Ac4 / NCTC 3858a / NRRL 328 / USDA 3528.7) OX=380704 GN=azaB PE=1 SV=1	Colletotrichum_plurivorum__gene-CPLU01_06267
Colletotrichum_plurivorum__gene-CPLU01_07429	1	7180	OTHER	100	BGC0000076__ACD39753.1	2.94e-171	71	OTHER	sp|B3FWS8|HPM3_HYPSB	0	50.2	sp|B3FWS8|HPM3_HYPSB Non-reducing polyketide synthase hmp3 OS=Hypomyces subiculosus OX=193393 GN=hpm3 PE=1 SV=1	Colletotrichum_plurivorum__gene-CPLU01_07429
Colletotrichum_plurivorum__gene-CPLU01_07846	1	8130	hr_pks	100	BGC0002234__EYE95336.1	2.02e-162	66.9	hr_pks	sp|G9N4B2|VIRA_HYPVG	0	57.7	sp|G9N4B2|VIRA_HYPVG Highly reducing polyketide synthase virA OS=Hypocrea virens (strain Gv29-8 / FGSC 10586) OX=413071 GN=virA PE=1 SV=1	Colletotrichum_plurivorum__gene-CPLU01_07846
Colletotrichum_plurivorum__gene-CPLU01_08544	1	8051	hr_pks	100	Ophiocordyceps_sinensis__gene-G6O67_007912	2.05e-215	48.2	hr_pks	sp|Q5KTM9|ALT5_ALTSO	0	34.5	sp|Q5KTM9|ALT5_ALTSO Highly reducing polyketide synthase alt5 OS=Alternaria solani OX=48100 GN=alt5 PE=1 SV=1	Colletotrichum_plurivorum__gene-CPLU01_08544
Colletotrichum_plurivorum__gene-CPLU01_09021	1	7500	hr_pks	100	lentithecium_fluviatile__estExt_Genewise1Plus.C_2_t10077	1.24e-121	36.6	hr_pks	sp|C8VJR7|ALNA_EMENI	0	35.2	sp|C8VJR7|ALNA_EMENI Highly reducing polyketide synthase alnA OS=Emericella nidulans (strain FGSC A4 / ATCC 38163 / CBS 112.46 / NRRL 194 / M139) OX=227321 GN=alnA PE=1 SV=1	Colletotrichum_plurivorum__gene-CPLU01_09021
Colletotrichum_plurivorum__gene-CPLU01_09024	1	8014	hr_pks	100	Colletotrichum_scovillei__gene-HER10_EVM0001067	0	66.8	hr_pks	sp|A0A3G1DJH7|SQTKS_PHOSM	0	41	sp|A0A3G1DJH7|SQTKS_PHOSM Squalestatin tetraketide synthase OS=Phoma sp. (strain ATCC 20986 / MF5453) OX=1828523 GN=pks1 PE=1 SV=1	Colletotrichum_plurivorum__gene-CPLU01_09024
Colletotrichum_plurivorum__gene-CPLU01_09358	1	309	hr_pks	98.9	BGC0001141__AIA58899.1	4.25e-18	47.6	hr_pks	sp|A0A068ABB7|BREF7_EUPBR	2.31e-19	47.5	sp|A0A068ABB7|BREF7_EUPBR Highly reducing polyketide synthase OS=Eupenicillium brefeldianum OX=1131482 GN=Bref-PKS PE=1 SV=1	Colletotrichum_plurivorum__gene-CPLU01_09358
Colletotrichum_plurivorum__gene-CPLU01_09359	1	1498	hr_pks	100	sp|P0CU84|APMLA_ARTPE	3e-33	46.1	hr_pks	sp|P0CU84|APMLA_ARTPE	1.47e-30	46.1	sp|P0CU84|APMLA_ARTPE Highly reducing polyketide synthase apmlA OS=Arthrinium phaeospermum OX=112178 GN=apmlA PE=1 SV=1	Colletotrichum_plurivorum__gene-CPLU01_09359
Colletotrichum_plurivorum__gene-CPLU01_09567	1	7916	hr_pks	99.6	Colletotrichum_musicola__gene-CMUS01_00567	0	98.5	hr_pks	sp|Q5KTM9|ALT5_ALTSO	0	74.4	sp|Q5KTM9|ALT5_ALTSO Highly reducing polyketide synthase alt5 OS=Alternaria solani OX=48100 GN=alt5 PE=1 SV=1	Colletotrichum_plurivorum__gene-CPLU01_09567
Colletotrichum_plurivorum__gene-CPLU01_10841	1	11990	hr_pks	100	BGC0002230__QPC57090.1	1.1e-290	53.3	hr_pks	sp|B8NJG3|LEPA_ASPFN	0	34.5	sp|B8NJG3|LEPA_ASPFN Hybrid PKS-NRPS synthetase lepA OS=Aspergillus flavus (strain ATCC 200026 / FGSC A1120 / IAM 13836 / NRRL 3357 / JCM 12722 / SRRC 167) OX=332952 GN=lepA PE=3 SV=1	Colletotrichum_plurivorum__gene-CPLU01_10841
Colletotrichum_plurivorum__gene-CPLU01_11387	1	7972	hr_pks	100	BGC0002525__BBU37368.1	1.05e-123	51	hr_pks	sp|A0A6S5ZY48|G433_FUSSX	0	39.2	sp|A0A6S5ZY48|G433_FUSSX Highly reducing polyketide synthase g433 OS=Fusarium sp. OX=29916 GN=g433 PE=2 SV=1	Colletotrichum_plurivorum__gene-CPLU01_11387
Colletotrichum_plurivorum__gene-CPLU01_11398	1	6203	hr_pks	100	BGC0001358__OAQ83760.1	8.15e-128	32.2	hr_pks	sp|A0A6S5ZY48|G433_FUSSX	7.37e-182	32	sp|A0A6S5ZY48|G433_FUSSX Highly reducing polyketide synthase g433 OS=Fusarium sp. OX=29916 GN=g433 PE=2 SV=1	Colletotrichum_plurivorum__gene-CPLU01_11398
Colletotrichum_plurivorum__gene-CPLU01_11556	1	8582	hr_pks	100	colletotrichum_graminicola__gene___GLRG_01860	0	56.1	hr_pks	sp|G4NEB1|NEC1_MAGO7	0	45.8	sp|G4NEB1|NEC1_MAGO7 Highly reducing polyketide synthase NEC1 OS=Magnaporthe oryzae (strain 70-15 / ATCC MYA-4617 / FGSC 8958) OX=242507 GN=NEC1 PE=1 SV=1	Colletotrichum_plurivorum__gene-CPLU01_11556
Colletotrichum_plurivorum__gene-CPLU01_11607	1	7571	hr_pks	100	sp|A0A2Z5TM64|HIMA_ASPJA	4.24e-307	55.5	hr_pks	sp|A0A2Z5TM64|HIMA_ASPJA	0	41.1	sp|A0A2Z5TM64|HIMA_ASPJA Polyketide synthase-nonribosomal peptide synthetase hybrid himA OS=Aspergillus japonicus OX=34381 GN=himA PE=3 SV=1	Colletotrichum_plurivorum__gene-CPLU01_11607
Colletotrichum_plurivorum__gene-CPLU01_11613	1	7265	OTHER	100	BGC0001923__BBF25315.1	0	71.3	OTHER	sp|A0A455R5P9|ASCC_ACREG	0	62.8	sp|A0A455R5P9|ASCC_ACREG Non-reducing polyketide synthase ascC OS=Acremonium egyptiacum OX=749675 GN=ascC PE=1 SV=1	Colletotrichum_plurivorum__gene-CPLU01_11613
Colletotrichum_plurivorum__gene-CPLU01_11635	1	5524	OTHER	100	BGC0000160__EAU32819.1	0	65.6	OTHER	sp|Q0CJ59|ATX_ASPTN	0	58.9	sp|Q0CJ59|ATX_ASPTN 6-methylsalicylic acid synthase OS=Aspergillus terreus (strain NIH 2624 / FGSC A1156) OX=341663 GN=atX PE=1 SV=1	Colletotrichum_plurivorum__gene-CPLU01_11635
Colletotrichum_plurivorum__gene-CPLU01_12132	1	8544	hr_pks	100	aspergillus_calidoustus_gca_001511075__gene___ASPCAL07647	4.73e-119	33.2	hr_pks	sp|Q0CF75|AZPB1_ASPTN	6.44e-148	27.6	sp|Q0CF75|AZPB1_ASPTN Highly reducing polyketide synthase ATEG_07659 OS=Aspergillus terreus (strain NIH 2624 / FGSC A1156) OX=341663 GN=ATEG_07659 PE=1 SV=1	Colletotrichum_plurivorum__gene-CPLU01_12132
Colletotrichum_plurivorum__gene-CPLU01_12416__renamed0076	1	7098	hr_pks	100	Colletotrichum_plurivorum__gene-CPLU01_12416	0	100	hr_pks	sp|G3XMD1|AZAB_ASPNA	6.47e-252	29.8	sp|G3XMD1|AZAB_ASPNA Highly reducing polyketide synthase azaB OS=Aspergillus niger (strain ATCC 1015 / CBS 113.46 / FGSC A1144 / LSHB Ac4 / NCTC 3858a / NRRL 328 / USDA 3528.7) OX=380704 GN=azaB PE=1 SV=1	Colletotrichum_plurivorum__gene-CPLU01_12416
Colletotrichum_plurivorum__gene-CPLU01_12656	1	4370	hr_pks	100	BGC0001141__AIA58899.1	5.12e-169	52.8	hr_pks	sp|A0A068ABB7|BREF7_EUPBR	2.18e-290	52.3	sp|A0A068ABB7|BREF7_EUPBR Highly reducing polyketide synthase OS=Eupenicillium brefeldianum OX=1131482 GN=Bref-PKS PE=1 SV=1	Colletotrichum_plurivorum__gene-CPLU01_12656
Colletotrichum_plurivorum__gene-CPLU01_12661	1	7791	hr_pks	99.5	BGC0002180__CBF82304.1	1.25e-132	42.3	hr_pks	sp|C8VJR7|ALNA_EMENI	0	41.9	sp|C8VJR7|ALNA_EMENI Highly reducing polyketide synthase alnA OS=Emericella nidulans (strain FGSC A4 / ATCC 38163 / CBS 112.46 / NRRL 194 / M139) OX=227321 GN=alnA PE=1 SV=1	Colletotrichum_plurivorum__gene-CPLU01_12661
Colletotrichum_plurivorum__gene-CPLU01_14037	1	6619	hr_pks	100	BGC0001358__OAQ83760.1	1.38e-126	32.7	hr_pks	sp|P0DUK1|PSPA_PENSO	2.69e-180	31.9	sp|P0DUK1|PSPA_PENSO Highly reducing polyketide synthase pspA OS=Penicillium soppii OX=69789 GN=pspA PE=3 SV=1	Colletotrichum_plurivorum__gene-CPLU01_14037
Colletotrichum_plurivorum__gene-CPLU01_14499	1	8634	hr_pks	100	Pyrenophora_seminiperda__gene-GMOD_00000948	2.11e-77	42.3	hr_pks	sp|Q5KTM9|ALT5_ALTSO	7.3e-218	26.8	sp|Q5KTM9|ALT5_ALTSO Highly reducing polyketide synthase alt5 OS=Alternaria solani OX=48100 GN=alt5 PE=1 SV=1	Colletotrichum_plurivorum__gene-CPLU01_14499
Colletotrichum_plurivorum__gene-CPLU01_14657	1	7919	hr_pks	100	BGC0002525__BBU37368.1	3.66e-157	41.7	hr_pks	sp|A0A6S5ZY48|G433_FUSSX	7.35e-255	38	sp|A0A6S5ZY48|G433_FUSSX Highly reducing polyketide synthase g433 OS=Fusarium sp. OX=29916 GN=g433 PE=2 SV=1	Colletotrichum_plurivorum__gene-CPLU01_14657
Colletotrichum_plurivorum__gene-CPLU01_15512	1	8249	OTHER	100	BGC0000027__AGN71604.1	0	60.4	OTHER	sp|A2QTE9|EPAA_ASPNC	0	46.8	sp|A2QTE9|EPAA_ASPNC Non-reducing polyketide synthase epaA OS=Aspergillus niger (strain CBS 513.88 / FGSC A1513) OX=425011 GN=epaA PE=3 SV=1	Colletotrichum_plurivorum__gene-CPLU01_15512
Colletotrichum_scovillei__gene-HER10_EVM0000289	1	9797	hr_pks	100	colletotrichum_nymphaeae_sa_01_gca_001563115__gene___CNYM01_01551	1.29e-136	49.5	hr_pks	sp|Q86ZD9|SQTKS_PHOSC	2.74e-251	31.5	sp|Q86ZD9|SQTKS_PHOSC Squalestatin tetraketide synthase OS=Phoma sp. (strain C2932) OX=86977 GN=pks1 PE=1 SV=1	Colletotrichum_scovillei__gene-HER10_EVM0000289
Colletotrichum_scovillei__gene-HER10_EVM0000360	1	6103	hr_pks	100	BGC0001035__EPE34340.1	7.44e-125	49.2	hr_pks	sp|A0A443HK66|VDTX1_BYSSP	5.85e-176	26.3	sp|A0A443HK66|VDTX1_BYSSP Highly reducing polyketide synthase VdtX OS=Byssochlamys spectabilis OX=264951 GN=VdtX PE=3 SV=1	Colletotrichum_scovillei__gene-HER10_EVM0000360
Colletotrichum_scovillei__gene-HER10_EVM0000855	1	9558	hr_pks	100	BGC0000098__ABA02239.1	4.07e-223	44	hr_pks	sp|Q3S2T9|MOKA_MONPI	0	36.6	sp|Q3S2T9|MOKA_MONPI Lovastatin nonaketide synthase mokA OS=Monascus pilosus OX=89488 GN=mokA PE=1 SV=1	Colletotrichum_scovillei__gene-HER10_EVM0000855
Colletotrichum_scovillei__gene-HER10_EVM0001067__renamed0078	1	7978	hr_pks	100	Colletotrichum_scovillei__gene-HER10_EVM0001067	0	97	hr_pks	sp|Q86ZD9|SQTKS_PHOSC	0	42.2	sp|Q86ZD9|SQTKS_PHOSC Squalestatin tetraketide synthase OS=Phoma sp. (strain C2932) OX=86977 GN=pks1 PE=1 SV=1	Colletotrichum_scovillei__gene-HER10_EVM0001067
Colletotrichum_scovillei__gene-HER10_EVM0001489	1	13183	hr_pks	100	BGC0002035__iliA	0	64.6	hr_pks	sp|P0DO30|ILIA_NEOS2	0	49.4	sp|P0DO30|ILIA_NEOS2 Hybrid PKS-NRPS synthetase iliA OS=Neonectria sp. (strain DH2) OX=1735992 GN=iliA PE=1 SV=1	Colletotrichum_scovillei__gene-HER10_EVM0001489
Colletotrichum_scovillei__gene-HER10_EVM0001688	1	7539	OUTLIER	*	None	None	None	None	sp|P34229|FAS1_YARLI	0	59.5	sp|P34229|FAS1_YARLI Fatty acid synthase subunit beta OS=Yarrowia lipolytica (strain CLIB 122 / E 150) OX=284591 GN=FAS1 PE=3 SV=2	Colletotrichum_scovillei__gene-HER10_EVM0001688
Colletotrichum_scovillei__gene-HER10_EVM0002828	1	8405	hr_pks	100	sp|A0A2Z5TM64|HIMA_ASPJA	2.75e-313	56.6	hr_pks	sp|A0A2Z5TM64|HIMA_ASPJA	0	42.1	sp|A0A2Z5TM64|HIMA_ASPJA Polyketide synthase-nonribosomal peptide synthetase hybrid himA OS=Aspergillus japonicus OX=34381 GN=himA PE=3 SV=1	Colletotrichum_scovillei__gene-HER10_EVM0002828
Colletotrichum_scovillei__gene-HER10_EVM0003295	1	8257	hr_pks	100	colletotrichum_graminicola__gene___GLRG_01860	0	61.3	hr_pks	sp|G4NEB1|NEC1_MAGO7	0	44.9	sp|G4NEB1|NEC1_MAGO7 Highly reducing polyketide synthase NEC1 OS=Magnaporthe oryzae (strain 70-15 / ATCC MYA-4617 / FGSC 8958) OX=242507 GN=NEC1 PE=1 SV=1	Colletotrichum_scovillei__gene-HER10_EVM0003295
Colletotrichum_scovillei__gene-HER10_EVM0003444	1	7617	OTHER	100	sp|P9WES9|LECAS_PSEFF	2.18e-179	39.6	OTHER	sp|E9KMQ2|GRA1_CLAGR	8.74e-234	30.9	sp|E9KMQ2|GRA1_CLAGR Non-reducing polyketide synthase PKS16 OS=Cladonia grayi OX=27339 GN=PKS16 PE=2 SV=1	Colletotrichum_scovillei__gene-HER10_EVM0003444
Colletotrichum_scovillei__gene-HER10_EVM0004270	1	1921	OTHER	100	sp|A0R1E8|PKS5_MYCS2	1.47e-27	32.4	OTHER	sp|Q9NWU1|OXSM_HUMAN	2.06e-125	52.4	sp|Q9NWU1|OXSM_HUMAN 3-oxoacyl-[acyl-carrier-protein] synthase, mitochondrial OS=Homo sapiens OX=9606 GN=OXSM PE=1 SV=1	Colletotrichum_scovillei__gene-HER10_EVM0004270
Colletotrichum_scovillei__gene-HER10_EVM0004288	1	5665	OTHER	100	BGC0002062__QBG38888.1	8.43e-296	61.6	OTHER	sp|Q4WQZ5|TPCC_ASPFU	0	64	sp|Q4WQZ5|TPCC_ASPFU Atrochrysone carboxylic acid synthase OS=Neosartorya fumigata (strain ATCC MYA-4609 / Af293 / CBS 101355 / FGSC A1100) OX=330879 GN=tpcC PE=2 SV=1	Colletotrichum_scovillei__gene-HER10_EVM0004288
Colletotrichum_scovillei__gene-HER10_EVM0004425	1	6408	OTHER	100	BGC0001541__PIB02405.1	0	67.2	OTHER	sp|A0A2G5IC96|CTB1_CERBT	0	54.6	sp|A0A2G5IC96|CTB1_CERBT Non-reducing polyketide synthase CTB1 OS=Cercospora beticola OX=122368 GN=CTB1 PE=3 SV=1	Colletotrichum_scovillei__gene-HER10_EVM0004425
Colletotrichum_scovillei__gene-HER10_EVM0004563	1	6824	hr_pks	100	BGC0002155__EHA48594.1	1.35e-123	45.2	hr_pks	sp|A0A4P8DJV2|DMXL2_CRYX8	4.05e-182	30.2	sp|A0A4P8DJV2|DMXL2_CRYX8 Highly reducing polyketide synthase dmxL2 OS=Cryptosporiopsis sp. (strain 8999) OX=2572248 GN=dmxL2 PE=3 SV=1	Colletotrichum_scovillei__gene-HER10_EVM0004563
Colletotrichum_scovillei__gene-HER10_EVM0004583	1	689	hr_pks	99.8	diaporthe_helianthi_gca_001702395__gene___DHEL01_v203905	6.26e-51	56.3	hr_pks	sp|Q5BA83|EASB_EMENI	6.61e-37	48.5	sp|Q5BA83|EASB_EMENI Highly reducing polyketide synthase easB OS=Emericella nidulans (strain FGSC A4 / ATCC 38163 / CBS 112.46 / NRRL 194 / M139) OX=227321 GN=easB PE=3 SV=1	Colletotrichum_scovillei__gene-HER10_EVM0004583
Colletotrichum_scovillei__gene-HER10_EVM0005077	1	7304	hr_pks	100	BGC0002180__CBF82304.1	4.18e-96	51.5	hr_pks	sp|C8VJR7|ALNA_EMENI	0	39.6	sp|C8VJR7|ALNA_EMENI Highly reducing polyketide synthase alnA OS=Emericella nidulans (strain FGSC A4 / ATCC 38163 / CBS 112.46 / NRRL 194 / M139) OX=227321 GN=alnA PE=1 SV=1	Colletotrichum_scovillei__gene-HER10_EVM0005077
Colletotrichum_scovillei__gene-HER10_EVM0005239	1	7820	hr_pks	100	BGC0002525__BBU37368.1	7.9e-95	40.4	hr_pks	sp|A0A6S5ZY48|G433_FUSSX	0	39.2	sp|A0A6S5ZY48|G433_FUSSX Highly reducing polyketide synthase g433 OS=Fusarium sp. OX=29916 GN=g433 PE=2 SV=1	Colletotrichum_scovillei__gene-HER10_EVM0005239
Colletotrichum_scovillei__gene-HER10_EVM0005328	1	2046	OTHER	100	BGC0002212__ESK96613.1	7.54e-14	23.5	OTHER	sp|Q9R9J2|FENF_BACIU	2.83e-22	30.5	sp|Q9R9J2|FENF_BACIU Malonyl CoA-acyl carrier protein transacylase OS=Bacillus subtilis OX=1423 GN=fenF PE=1 SV=1	Colletotrichum_scovillei__gene-HER10_EVM0005328
Colletotrichum_scovillei__gene-HER10_EVM0006576	1	9142	OTHER	100	BGC0002161__ETS82099.1	0	84.1	OTHER	sp|W3X7U2|PFMAE_PESFW	0	71.5	sp|W3X7U2|PFMAE_PESFW Conidial pigment polyketide synthase PfmaE OS=Pestalotiopsis fici (strain W106-1 / CGMCC3.15140) OX=1229662 GN=PfmaE PE=2 SV=1	Colletotrichum_scovillei__gene-HER10_EVM0006576
Colletotrichum_scovillei__gene-HER10_EVM0007585	1	7509	hr_pks	100	lentithecium_fluviatile__estExt_Genewise1Plus.C_2_t10077	3.9e-114	57.3	hr_pks	sp|C8VJR7|ALNA_EMENI	1.41e-255	30.6	sp|C8VJR7|ALNA_EMENI Highly reducing polyketide synthase alnA OS=Emericella nidulans (strain FGSC A4 / ATCC 38163 / CBS 112.46 / NRRL 194 / M139) OX=227321 GN=alnA PE=1 SV=1	Colletotrichum_scovillei__gene-HER10_EVM0007585
Colletotrichum_scovillei__gene-HER10_EVM0007599	1	5229	hr_pks	100	trichoderma_longibrachiatum_atcc_18648_gca_003025155__gene___M440DRAFT_1102985	3.96e-118	43.8	hr_pks	sp|C8VJR7|ALNA_EMENI	2.04e-154	31.6	sp|C8VJR7|ALNA_EMENI Highly reducing polyketide synthase alnA OS=Emericella nidulans (strain FGSC A4 / ATCC 38163 / CBS 112.46 / NRRL 194 / M139) OX=227321 GN=alnA PE=1 SV=1	Colletotrichum_scovillei__gene-HER10_EVM0007599
Colletotrichum_scovillei__gene-HER10_EVM0008552	1	7665	hr_pks	100	BGC0002525__BBU37368.1	1.77e-297	54.7	hr_pks	sp|A0A6S5ZY48|G433_FUSSX	0	46.6	sp|A0A6S5ZY48|G433_FUSSX Highly reducing polyketide synthase g433 OS=Fusarium sp. OX=29916 GN=g433 PE=2 SV=1	Colletotrichum_scovillei__gene-HER10_EVM0008552
Colletotrichum_scovillei__gene-HER10_EVM0009395	1	12328	hr_pks	100	BGC0002066__KKP04599.1	0	60.2	hr_pks	sp|B8NJG3|LEPA_ASPFN	0	47.8	sp|B8NJG3|LEPA_ASPFN Hybrid PKS-NRPS synthetase lepA OS=Aspergillus flavus (strain ATCC 200026 / FGSC A1120 / IAM 13836 / NRRL 3357 / JCM 12722 / SRRC 167) OX=332952 GN=lepA PE=3 SV=1	Colletotrichum_scovillei__gene-HER10_EVM0009395
Colletotrichum_scovillei__gene-HER10_EVM0010404	1	7066	OTHER	100	BGC0002209__KIA75596.1	0	57.7	OTHER	sp|Q5AZ32|PKBA_EMENI	0	41.2	sp|Q5AZ32|PKBA_EMENI Non-reducing polyketide synthase pkbA OS=Emericella nidulans (strain FGSC A4 / ATCC 38163 / CBS 112.46 / NRRL 194 / M139) OX=227321 GN=pkbA PE=1 SV=1	Colletotrichum_scovillei__gene-HER10_EVM0010404
Colletotrichum_scovillei__gene-HER10_EVM0010423	1	8085	hr_pks	100	Ophiocordyceps_sinensis__gene-G6O67_007912	2.36e-237	45.3	hr_pks	sp|Q5KTM9|ALT5_ALTSO	0	35.7	sp|Q5KTM9|ALT5_ALTSO Highly reducing polyketide synthase alt5 OS=Alternaria solani OX=48100 GN=alt5 PE=1 SV=1	Colletotrichum_scovillei__gene-HER10_EVM0010423
Colletotrichum_scovillei__gene-HER10_EVM0011265	1	12160	hr_pks	100	BGC0001124__EHA19289.1	0	62.7	hr_pks	sp|A5ABG0|PYNA_ASPNC	0	54.7	sp|A5ABG0|PYNA_ASPNC Hybrid PKS-NRPS synthetase pynA OS=Aspergillus niger (strain CBS 513.88 / FGSC A1513) OX=425011 GN=pynA PE=1 SV=1	Colletotrichum_scovillei__gene-HER10_EVM0011265
Colletotrichum_scovillei__gene-HER10_EVM0011586	1	6571	OTHER	100	BGC0001245__AHV78247.1	1.19e-297	64.5	OTHER	sp|B3FWS8|HPM3_HYPSB	0	60.5	sp|B3FWS8|HPM3_HYPSB Non-reducing polyketide synthase hmp3 OS=Hypomyces subiculosus OX=193393 GN=hpm3 PE=1 SV=1	Colletotrichum_scovillei__gene-HER10_EVM0011586
Colletotrichum_scovillei__gene-HER10_EVM0011705	1	8503	hr_pks	100	sp|P0DUK1|PSPA_PENSO	1.47e-95	42	hr_pks	sp|P0DUK1|PSPA_PENSO	7.12e-257	31.7	sp|P0DUK1|PSPA_PENSO Highly reducing polyketide synthase pspA OS=Penicillium soppii OX=69789 GN=pspA PE=3 SV=1	Colletotrichum_scovillei__gene-HER10_EVM0011705
Colletotrichum_scovillei__gene-HER10_EVM0011824	1	8066	hr_pks	100	Colletotrichum_sojae__gene-CSOJ01_06782	0	60.5	hr_pks	sp|Q5KTM9|ALT5_ALTSO	0	67.3	sp|Q5KTM9|ALT5_ALTSO Highly reducing polyketide synthase alt5 OS=Alternaria solani OX=48100 GN=alt5 PE=1 SV=1	Colletotrichum_scovillei__gene-HER10_EVM0011824
Colletotrichum_scovillei__gene-HER10_EVM0012053	1	9059	hr_pks	100	Colletotrichum_plurivorum__gene-CPLU01_12416	0	74.1	hr_pks	sp|G3XMD1|AZAB_ASPNA	8.05e-287	29.5	sp|G3XMD1|AZAB_ASPNA Highly reducing polyketide synthase azaB OS=Aspergillus niger (strain ATCC 1015 / CBS 113.46 / FGSC A1144 / LSHB Ac4 / NCTC 3858a / NRRL 328 / USDA 3528.7) OX=380704 GN=azaB PE=1 SV=1	Colletotrichum_scovillei__gene-HER10_EVM0012053
Colletotrichum_scovillei__gene-HER10_EVM0012075	1	12108	hr_pks	100	sp|A0A0E4AZP0|FSA1_FUSSF	1.21e-249	56.9	hr_pks	sp|A0A7L8UVC9|FFSA_ASPFV	0	37.9	sp|A0A7L8UVC9|FFSA_ASPFV Polyketide synthase-nonribosomal peptide synthetase ffsA OS=Aspergillus flavipes OX=41900 GN=ffsA PE=3 SV=1	Colletotrichum_scovillei__gene-HER10_EVM0012075
Colletotrichum_scovillei__gene-HER10_EVM0012096	1	9526	hr_pks	100	BGC0001141__AIA58899.1	1.35e-137	40.7	hr_pks	sp|A0A068ABB7|BREF7_EUPBR	0	45	sp|A0A068ABB7|BREF7_EUPBR Highly reducing polyketide synthase OS=Eupenicillium brefeldianum OX=1131482 GN=Bref-PKS PE=1 SV=1	Colletotrichum_scovillei__gene-HER10_EVM0012096
Colletotrichum_scovillei__gene-HER10_EVM0012121	1	880	hr_pks	100	BGC0002139__KAF5858310.1	8.25e-153	75.8	hr_pks	sp|I1S166|FSL1_GIBZE	3.53e-126	64.8	sp|I1S166|FSL1_GIBZE Fusarielin synthase FSL1 OS=Gibberella zeae (strain ATCC MYA-4620 / CBS 123657 / FGSC 9075 / NRRL 31084 / PH-1) OX=229533 GN=FSL1 PE=2 SV=1	Colletotrichum_scovillei__gene-HER10_EVM0012121
Colletotrichum_shisoi__gene-CSHISOI_00508	1	1071	OTHER	100	BGC0002212__ESK96613.1	6.22e-13	24.5	OTHER	sp|Q9R9J2|FENF_BACIU	2.62e-21	28.1	sp|Q9R9J2|FENF_BACIU Malonyl CoA-acyl carrier protein transacylase OS=Bacillus subtilis OX=1423 GN=fenF PE=1 SV=1	Colletotrichum_shisoi__gene-CSHISOI_00508
Colletotrichum_shisoi__gene-CSHISOI_01887	1	8729	hr_pks	100	trichoderma_guizhouense_gca_002022785__gene___A0O28_0066220	1.18e-153	43.4	hr_pks	sp|A0A0D2YG10|FUB1_FUSO4	6.44e-169	25.8	sp|A0A0D2YG10|FUB1_FUSO4 Reducing polyketide synthase FUB1 OS=Fusarium oxysporum f. sp. lycopersici (strain 4287 / CBS 123668 / FGSC 9935 / NRRL 34936) OX=426428 GN=FUB1 PE=1 SV=2	Colletotrichum_shisoi__gene-CSHISOI_01887
Colletotrichum_shisoi__gene-CSHISOI_02234	1	7535	hr_pks	100	trichoderma_longibrachiatum_atcc_18648_gca_003025155__gene___M440DRAFT_1102985	1e-210	40.7	hr_pks	sp|Q5KTM9|ALT5_ALTSO	2.16e-128	39.7	sp|Q5KTM9|ALT5_ALTSO Highly reducing polyketide synthase alt5 OS=Alternaria solani OX=48100 GN=alt5 PE=1 SV=1	Colletotrichum_shisoi__gene-CSHISOI_02234
Colletotrichum_shisoi__gene-CSHISOI_04399	1	3262	OTHER	100	sp|Q02251|MCAS_MYCBO	2.56e-25	27	OTHER	sp|P56902|FABF_RHIME	6.22e-135	47.7	sp|P56902|FABF_RHIME 3-oxoacyl-[acyl-carrier-protein] synthase 2 OS=Rhizobium meliloti (strain 1021) OX=266834 GN=fabF PE=3 SV=2	Colletotrichum_shisoi__gene-CSHISOI_04399
Colletotrichum_shisoi__gene-CSHISOI_04815	1	7588	hr_pks	100	lentithecium_fluviatile__estExt_Genewise1Plus.C_2_t10077	2.25e-213	55.7	hr_pks	sp|C8VJR7|ALNA_EMENI	0	38.9	sp|C8VJR7|ALNA_EMENI Highly reducing polyketide synthase alnA OS=Emericella nidulans (strain FGSC A4 / ATCC 38163 / CBS 112.46 / NRRL 194 / M139) OX=227321 GN=alnA PE=1 SV=1	Colletotrichum_shisoi__gene-CSHISOI_04815
Colletotrichum_shisoi__gene-CSHISOI_04845	1	6360	OUTLIER	*	None	None	None	None	sp|P34229|FAS1_YARLI	0	59.3	sp|P34229|FAS1_YARLI Fatty acid synthase subunit beta OS=Yarrowia lipolytica (strain CLIB 122 / E 150) OX=284591 GN=FAS1 PE=3 SV=2	Colletotrichum_shisoi__gene-CSHISOI_04845
Colletotrichum_shisoi__gene-CSHISOI_05143	1	5948	macrolactone_ancestral_clade	100	Colletotrichum_higginsianum__gene3558	1.38e-70	93.2	macrolactone_ancestral_clade	sp|B3FWT3|HPM8_HYPSB	0	48	sp|B3FWT3|HPM8_HYPSB Reducing polyketide synthase hmp8 OS=Hypomyces subiculosus OX=193393 GN=hpm8 PE=1 SV=1	Colletotrichum_shisoi__gene-CSHISOI_05143
Colletotrichum_shisoi__gene-CSHISOI_05566	1	7006	hr_pks	100	BGC0000046__ACZ57548.1	7.47e-108	41.8	hr_pks	sp|D2E9X0|DEP5_ALTBR	1.06e-192	29.7	sp|D2E9X0|DEP5_ALTBR Reducing polyketide synthase DEP5 OS=Alternaria brassicicola OX=29001 GN=DEP5 PE=2 SV=1	Colletotrichum_shisoi__gene-CSHISOI_05566
Colletotrichum_shisoi__gene-CSHISOI_05779	1	2823	hr_pks	99	BGC0001866__XP_028481819.1	9.12e-179	56	hr_pks	sp|A0A443HK66|VDTX1_BYSSP	8.67e-165	56	sp|A0A443HK66|VDTX1_BYSSP Highly reducing polyketide synthase VdtX OS=Byssochlamys spectabilis OX=264951 GN=VdtX PE=3 SV=1	Colletotrichum_shisoi__gene-CSHISOI_05779
Colletotrichum_shisoi__gene-CSHISOI_05867	1	7260	hr_pks	100	aspergillus_sydowii_cbs_593_65_gca_001890705__gene___ASPSYDRAFT_62430	2.19e-167	43.9	hr_pks	sp|C8VJR7|ALNA_EMENI	1.13e-243	33.1	sp|C8VJR7|ALNA_EMENI Highly reducing polyketide synthase alnA OS=Emericella nidulans (strain FGSC A4 / ATCC 38163 / CBS 112.46 / NRRL 194 / M139) OX=227321 GN=alnA PE=1 SV=1	Colletotrichum_shisoi__gene-CSHISOI_05867
Colletotrichum_shisoi__gene-CSHISOI_06572	1	9168	hr_pks	100	zopfia_rhizophila__estExt_Genewise1Plus.C_870143	1.38e-122	54.8	hr_pks	sp|Q5KTM9|ALT5_ALTSO	0	32.3	sp|Q5KTM9|ALT5_ALTSO Highly reducing polyketide synthase alt5 OS=Alternaria solani OX=48100 GN=alt5 PE=1 SV=1	Colletotrichum_shisoi__gene-CSHISOI_06572
Colletotrichum_shisoi__gene-CSHISOI_06648	1	9500	hr_pks	100	sp|P9WET4|PREU5_PREIS	2.69e-90	33.4	hr_pks	sp|E5AE40|PKS2_LEPMJ	0	34.7	sp|E5AE40|PKS2_LEPMJ Highly reducing polyketide synthase PKS2 OS=Leptosphaeria maculans (strain JN3 / isolate v23.1.3 / race Av1-4-5-6-7-8) OX=985895 GN=PKS2 PE=2 SV=1	Colletotrichum_shisoi__gene-CSHISOI_06648
Colletotrichum_shisoi__gene-CSHISOI_06656	1	7980	hr_pks	100	Colletotrichum_scovillei__gene-HER10_EVM0001067	0	76.8	hr_pks	sp|G3XMD1|AZAB_ASPNA	0	42.1	sp|G3XMD1|AZAB_ASPNA Highly reducing polyketide synthase azaB OS=Aspergillus niger (strain ATCC 1015 / CBS 113.46 / FGSC A1144 / LSHB Ac4 / NCTC 3858a / NRRL 328 / USDA 3528.7) OX=380704 GN=azaB PE=1 SV=1	Colletotrichum_shisoi__gene-CSHISOI_06656
Colletotrichum_shisoi__gene-CSHISOI_06728	1	12714	hr_pks	100	BGC0002035__iliA	0	62.8	hr_pks	sp|P0DO30|ILIA_NEOS2	0	50.1	sp|P0DO30|ILIA_NEOS2 Hybrid PKS-NRPS synthetase iliA OS=Neonectria sp. (strain DH2) OX=1735992 GN=iliA PE=1 SV=1	Colletotrichum_shisoi__gene-CSHISOI_06728
Colletotrichum_shisoi__gene-CSHISOI_06915	1	8754	hr_pks	100	sp|P0DUK1|PSPA_PENSO	2.19e-111	37.4	hr_pks	sp|P0DUK1|PSPA_PENSO	2.38e-152	31.7	sp|P0DUK1|PSPA_PENSO Highly reducing polyketide synthase pspA OS=Penicillium soppii OX=69789 GN=pspA PE=3 SV=1	Colletotrichum_shisoi__gene-CSHISOI_06915
Colletotrichum_shisoi__gene-CSHISOI_07150	1	6770	OTHER	100	BGC0002161__ETS82099.1	0	84.1	OTHER	sp|W3X7U2|PFMAE_PESFW	0	69.9	sp|W3X7U2|PFMAE_PESFW Conidial pigment polyketide synthase PfmaE OS=Pestalotiopsis fici (strain W106-1 / CGMCC3.15140) OX=1229662 GN=PfmaE PE=2 SV=1	Colletotrichum_shisoi__gene-CSHISOI_07150
Colletotrichum_shisoi__gene-CSHISOI_08091	1	7813	hr_pks	100	sp|A0A2Z5TM64|HIMA_ASPJA	1.11e-317	56.1	hr_pks	sp|A0A2Z5TM64|HIMA_ASPJA	0	41.2	sp|A0A2Z5TM64|HIMA_ASPJA Polyketide synthase-nonribosomal peptide synthetase hybrid himA OS=Aspergillus japonicus OX=34381 GN=himA PE=3 SV=1	Colletotrichum_shisoi__gene-CSHISOI_08091
Colletotrichum_shisoi__gene-CSHISOI_08186	1	7534	hr_pks	100	Colletotrichum_plurivorum__gene-CPLU01_12416	0	71.5	hr_pks	sp|A0A0D2YG10|FUB1_FUSO4	6.9e-305	30.8	sp|A0A0D2YG10|FUB1_FUSO4 Reducing polyketide synthase FUB1 OS=Fusarium oxysporum f. sp. lycopersici (strain 4287 / CBS 123668 / FGSC 9935 / NRRL 34936) OX=426428 GN=FUB1 PE=1 SV=2	Colletotrichum_shisoi__gene-CSHISOI_08186
Colletotrichum_shisoi__gene-CSHISOI_08606	1	8484	hr_pks	100	BGC0001892__ATZ45182.1	7.69e-183	42.1	hr_pks	sp|B1GVX7|BOA6_BOTFB	9.44e-206	34.6	sp|B1GVX7|BOA6_BOTFB Reducing polyketide synthase BOA6 OS=Botryotinia fuckeliana (strain B05.10) OX=332648 GN=BOA6 PE=2 SV=1	Colletotrichum_shisoi__gene-CSHISOI_08606
Colletotrichum_shisoi__gene-CSHISOI_08647	1	10181	hr_pks	100	BGC0000039__BAC20564.1	4.18e-228	56.3	hr_pks	sp|Q8J0F7|MLCA_PENCI	0	53.6	sp|Q8J0F7|MLCA_PENCI Compactin nonaketide synthase, polyketide synthase component OS=Penicillium citrinum OX=5077 GN=mlcA PE=1 SV=1	Colletotrichum_shisoi__gene-CSHISOI_08647
Colletotrichum_shisoi__gene-CSHISOI_09700	1	7233	hr_pks	100	BGC0001358__OAQ83765.1	4.52e-105	45.7	hr_pks	sp|A0A179H0J7|LCSC_PURLI	3.54e-96	45.9	sp|A0A179H0J7|LCSC_PURLI Highly reducing polyketide synthase lcsC OS=Purpureocillium lilacinum OX=33203 GN=lcsC PE=2 SV=1	Colletotrichum_shisoi__gene-CSHISOI_09700
Colletotrichum_shisoi__gene-CSHISOI_11439	1	4461	hr_pks	100	colletotrichum_graminicola__gene___GLRG_01860	2.78e-215	67.9	hr_pks	sp|G4NEB1|NEC1_MAGO7	5.42e-237	45.1	sp|G4NEB1|NEC1_MAGO7 Highly reducing polyketide synthase NEC1 OS=Magnaporthe oryzae (strain 70-15 / ATCC MYA-4617 / FGSC 8958) OX=242507 GN=NEC1 PE=1 SV=1	Colletotrichum_shisoi__gene-CSHISOI_11439
Colletotrichum_sidae__gene-C8034_v000455	1	5509	OTHER	100	sp|C5H882|RADS2_FLOCH	3.31e-250	55	OTHER	sp|A0A098D6U0|ZEA1_GIBZE	0	37.7	sp|A0A098D6U0|ZEA1_GIBZE Non-reducing polyketide synthase ZEA1 OS=Gibberella zeae (strain ATCC MYA-4620 / CBS 123657 / FGSC 9075 / NRRL 31084 / PH-1) OX=229533 GN=ZEA1 PE=1 SV=1	Colletotrichum_sidae__gene-C8034_v000455
Colletotrichum_sidae__gene-C8034_v001444	1	7751	hr_pks	100	sp|A0A2Z5TM64|HIMA_ASPJA	7.03e-307	55	hr_pks	sp|A0A2Z5TM64|HIMA_ASPJA	0	40.9	sp|A0A2Z5TM64|HIMA_ASPJA Polyketide synthase-nonribosomal peptide synthetase hybrid himA OS=Aspergillus japonicus OX=34381 GN=himA PE=3 SV=1	Colletotrichum_sidae__gene-C8034_v001444
Colletotrichum_sidae__gene-C8034_v001545	1	10101	hr_pks	100	colletotrichum_nymphaeae_sa_01_gca_001563115__gene___CNYM01_01551	6.82e-123	43.3	hr_pks	sp|Q86ZD9|SQTKS_PHOSC	0	32	sp|Q86ZD9|SQTKS_PHOSC Squalestatin tetraketide synthase OS=Phoma sp. (strain C2932) OX=86977 GN=pks1 PE=1 SV=1	Colletotrichum_sidae__gene-C8034_v001545
Colletotrichum_sidae__gene-C8034_v001547	1	2151	OTHER	100	BGC0002594__ESU09199.1	7.63e-102	54.8	OTHER	sp|A0A2H3CTK0|ARMB_ARMGA	3.44e-55	39.7	sp|A0A2H3CTK0|ARMB_ARMGA Orsellinic acid synthase armB OS=Armillaria gallica OX=47427 GN=armB PE=1 SV=1	Colletotrichum_sidae__gene-C8034_v001547
Colletotrichum_sidae__gene-C8034_v001548	1	2986	OTHER	100	BGC0002594__ESU09199.1	1.54e-43	47.1	OTHER	sp|A0A2H3CTK0|ARMB_ARMGA	2.83e-91	33.2	sp|A0A2H3CTK0|ARMB_ARMGA Orsellinic acid synthase armB OS=Armillaria gallica OX=47427 GN=armB PE=1 SV=1	Colletotrichum_sidae__gene-C8034_v001548
Colletotrichum_sidae__gene-C8034_v001551	1	8038	OTHER	100	sp|P9WES9|LECAS_PSEFF	1.94e-148	58.7	OTHER	sp|E9KMQ2|GRA1_CLAGR	3.65e-205	29.2	sp|E9KMQ2|GRA1_CLAGR Non-reducing polyketide synthase PKS16 OS=Cladonia grayi OX=27339 GN=PKS16 PE=2 SV=1	Colletotrichum_sidae__gene-C8034_v001551
Colletotrichum_sidae__gene-C8034_v002248	1	7966	hr_pks	100	BGC0001907__gene4	4.17e-126	44.8	hr_pks	sp|A0A6S5ZY48|G433_FUSSX	0	39	sp|A0A6S5ZY48|G433_FUSSX Highly reducing polyketide synthase g433 OS=Fusarium sp. OX=29916 GN=g433 PE=2 SV=1	Colletotrichum_sidae__gene-C8034_v002248
Colletotrichum_sidae__gene-C8034_v002373	1	8345	hr_pks	100	Colletotrichum_spinosum__gene-C8035_v001848	0	65.7	hr_pks	sp|Q5KTM9|ALT5_ALTSO	0	45.5	sp|Q5KTM9|ALT5_ALTSO Highly reducing polyketide synthase alt5 OS=Alternaria solani OX=48100 GN=alt5 PE=1 SV=1	Colletotrichum_sidae__gene-C8034_v002373
Colletotrichum_sidae__gene-C8034_v002428	1	3105	OTHER	100	BGC0002257__QLM00044.1	9.52e-20	35.4	OTHER	sp|A2QX23|ADAB_ASPNC	2.21e-34	63.9	sp|A2QX23|ADAB_ASPNC Lactamase-like protein adaB OS=Aspergillus niger (strain CBS 513.88 / FGSC A1513) OX=425011 GN=adaB PE=1 SV=1	Colletotrichum_sidae__gene-C8034_v002428
Colletotrichum_sidae__gene-C8034_v003216	1	6752	OTHER	100	BGC0001541__PIB02405.1	0	61.4	OTHER	sp|Q6DQW3|CTB1_CERNC	0	53.6	sp|Q6DQW3|CTB1_CERNC Non-reducing polyketide synthase CTB1 OS=Cercospora nicotianae OX=29003 GN=CTB1 PE=1 SV=1	Colletotrichum_sidae__gene-C8034_v003216
Colletotrichum_sidae__gene-C8034_v003783	1	1467	OTHER	100	BGC0001338__ALI92655.1	1.43e-80	40.8	OTHER	sp|A0A0R8YWJ7|MPAS_CLAUC	3.62e-101	40.6	sp|A0A0R8YWJ7|MPAS_CLAUC Methylphloroacetophenone synthase OS=Cladonia uncialis OX=174080 GN=mpas PE=1 SV=2	Colletotrichum_sidae__gene-C8034_v003783
Colletotrichum_sidae__gene-C8034_v003869	1	13033	hr_pks	100	BGC0002235__EHA55875.1	0	68.6	hr_pks	sp|A1CLY8|CCSA_ASPCL	0	51.3	sp|A1CLY8|CCSA_ASPCL Polyketide synthase-nonribosomal peptide synthetase OS=Aspergillus clavatus (strain ATCC 1007 / CBS 513.65 / DSM 816 / NCTC 3887 / NRRL 1 / QM 1276 / 107) OX=344612 GN=ccsA PE=3 SV=1	Colletotrichum_sidae__gene-C8034_v003869
Colletotrichum_sidae__gene-C8034_v004182__renamed0079	1	8951	macrolactone_ancestral_clade	100	Colletotrichum_sidae__gene-C8034_v004182	0	95.3	macrolactone_ancestral_clade	sp|B3FWT3|HPM8_HYPSB	0	51.1	sp|B3FWT3|HPM8_HYPSB Reducing polyketide synthase hmp8 OS=Hypomyces subiculosus OX=193393 GN=hpm8 PE=1 SV=1	Colletotrichum_sidae__gene-C8034_v004182
Colletotrichum_sidae__gene-C8034_v004183	1	6968	OTHER	100	sp|A0A098D6U0|ZEA1_GIBZE	8.21e-292	51.9	OTHER	sp|B3FWS8|HPM3_HYPSB	0	42.3	sp|B3FWS8|HPM3_HYPSB Non-reducing polyketide synthase hmp3 OS=Hypomyces subiculosus OX=193393 GN=hpm3 PE=1 SV=1	Colletotrichum_sidae__gene-C8034_v004183
Colletotrichum_sidae__gene-C8034_v004952	1	1709	OTHER	100	BGC0001541__PIB02405.1	5.2e-33	70.4	OTHER	sp|Q6DQW3|CTB1_CERNC	2.14e-55	43.8	sp|Q6DQW3|CTB1_CERNC Non-reducing polyketide synthase CTB1 OS=Cercospora nicotianae OX=29003 GN=CTB1 PE=1 SV=1	Colletotrichum_sidae__gene-C8034_v004952
Colletotrichum_sidae__gene-C8034_v004954	1	3613	OTHER	100	BGC0001542__ARU80380.1	1.34e-63	50.9	OTHER	sp|A0A2G5IC96|CTB1_CERBT	8.52e-121	36.7	sp|A0A2G5IC96|CTB1_CERBT Non-reducing polyketide synthase CTB1 OS=Cercospora beticola OX=122368 GN=CTB1 PE=3 SV=1	Colletotrichum_sidae__gene-C8034_v004954
Colletotrichum_sidae__gene-C8034_v005106	1	10116	hr_pks	100	BGC0000098__ABA02239.1	8.25e-179	44	hr_pks	sp|Q3S2T9|MOKA_MONPI	0	47.1	sp|Q3S2T9|MOKA_MONPI Lovastatin nonaketide synthase mokA OS=Monascus pilosus OX=89488 GN=mokA PE=1 SV=1	Colletotrichum_sidae__gene-C8034_v005106
Colletotrichum_sidae__gene-C8034_v006510	1	1361	OTHER	100	BGC0002212__ESK96613.1	6.95e-13	23.9	OTHER	sp|P71019|FABD_BACSU	7.82e-41	36.2	sp|P71019|FABD_BACSU Malonyl CoA-acyl carrier protein transacylase OS=Bacillus subtilis (strain 168) OX=224308 GN=fabD PE=3 SV=2	Colletotrichum_sidae__gene-C8034_v006510
Colletotrichum_sidae__gene-C8034_v006801	1	7766	OTHER	100	BGC0002483__AUW31052.1	7.16e-259	50.6	OTHER	sp|Q5AZ32|PKBA_EMENI	0	37.8	sp|Q5AZ32|PKBA_EMENI Non-reducing polyketide synthase pkbA OS=Emericella nidulans (strain FGSC A4 / ATCC 38163 / CBS 112.46 / NRRL 194 / M139) OX=227321 GN=pkbA PE=1 SV=1	Colletotrichum_sidae__gene-C8034_v006801
Colletotrichum_sidae__gene-C8034_v008038	1	7909	hr_pks	100	BGC0002525__BBU37368.1	1.82e-82	30.8	hr_pks	sp|A0A6S5ZY48|G433_FUSSX	4.2e-257	31.2	sp|A0A6S5ZY48|G433_FUSSX Highly reducing polyketide synthase g433 OS=Fusarium sp. OX=29916 GN=g433 PE=2 SV=1	Colletotrichum_sidae__gene-C8034_v008038
Colletotrichum_sidae__gene-C8034_v008045	1	6123	hr_pks	100	BGC0000334__simG	3.98e-72	41.5	hr_pks	sp|A0A179H2I8|LCSB_PURLI	4.99e-143	40.3	sp|A0A179H2I8|LCSB_PURLI Highly reducing polyketide synthase lcsB OS=Purpureocillium lilacinum OX=33203 GN=lcsB PE=2 SV=1	Colletotrichum_sidae__gene-C8034_v008045
Colletotrichum_sidae__gene-C8034_v008486	1	1452	OTHER	100	sp|Q7TXK8|MSL7_MYCBO	2.15e-27	38	OTHER	sp|Q8L3X9|KASM_ARATH	1.81e-99	56.8	sp|Q8L3X9|KASM_ARATH 3-oxoacyl-[acyl-carrier-protein] synthase, mitochondrial OS=Arabidopsis thaliana OX=3702 GN=KAS PE=1 SV=1	Colletotrichum_sidae__gene-C8034_v008486
Colletotrichum_sidae__gene-C8034_v009255	1	8207	hr_pks	100	colletotrichum_graminicola__gene___GLRG_01860	0	58.8	hr_pks	sp|G4NEB1|NEC1_MAGO7	0	44	sp|G4NEB1|NEC1_MAGO7 Highly reducing polyketide synthase NEC1 OS=Magnaporthe oryzae (strain 70-15 / ATCC MYA-4617 / FGSC 8958) OX=242507 GN=NEC1 PE=1 SV=1	Colletotrichum_sidae__gene-C8034_v009255
Colletotrichum_sidae__gene-C8034_v009666	1	6361	OUTLIER	*	None	None	None	None	sp|P34229|FAS1_YARLI	0	57.7	sp|P34229|FAS1_YARLI Fatty acid synthase subunit beta OS=Yarrowia lipolytica (strain CLIB 122 / E 150) OX=284591 GN=FAS1 PE=3 SV=2	Colletotrichum_sidae__gene-C8034_v009666
Colletotrichum_sidae__gene-C8034_v009762	1	7932	hr_pks	100	diaporthe_helianthi_gca_001702395__gene___DHEL01_v203905	2.74e-116	45.7	hr_pks	sp|G4NEB1|NEC1_MAGO7	0	31.3	sp|G4NEB1|NEC1_MAGO7 Highly reducing polyketide synthase NEC1 OS=Magnaporthe oryzae (strain 70-15 / ATCC MYA-4617 / FGSC 8958) OX=242507 GN=NEC1 PE=1 SV=1	Colletotrichum_sidae__gene-C8034_v009762
Colletotrichum_sidae__gene-C8034_v010621	1	1771	hr_pks	100	phaeomoniella_chlamydospora_gca_001006345__gene___UCRPC4_g04266	2.32e-45	33.3	hr_pks	sp|A0A0U5GK88|AUSV_ASPCI	8.51e-34	60.6	sp|A0A0U5GK88|AUSV_ASPCI Highly reducing polyketide synthase ausV OS=Aspergillus calidoustus OX=454130 GN=ausV PE=1 SV=1	Colletotrichum_sidae__gene-C8034_v010621
Colletotrichum_sidae__gene-C8034_v010711	1	7083	hr_pks	100	Colletotrichum_plurivorum__gene-CPLU01_12416	0	92.2	hr_pks	sp|G3XMD1|AZAB_ASPNA	3.59e-255	29.5	sp|G3XMD1|AZAB_ASPNA Highly reducing polyketide synthase azaB OS=Aspergillus niger (strain ATCC 1015 / CBS 113.46 / FGSC A1144 / LSHB Ac4 / NCTC 3858a / NRRL 328 / USDA 3528.7) OX=380704 GN=azaB PE=1 SV=1	Colletotrichum_sidae__gene-C8034_v010711
Colletotrichum_sidae__gene-C8034_v010998	1	4878	hr_pks	100	colletotrichum_nymphaeae_sa_01_gca_001563115__gene___CNYM01_00149	8.17e-152	76	hr_pks	sp|A0A345BJP0|CLZ2_COCLU	0	42.8	sp|A0A345BJP0|CLZ2_COCLU Squalestatin tetraketide synthase clz2 OS=Cochliobolus lunatus OX=5503 GN=clz2 PE=3 SV=1	Colletotrichum_sidae__gene-C8034_v010998
Colletotrichum_sidae__gene-C8034_v011011	1	8544	hr_pks	100	Ophiocordyceps_sinensis__gene-G6O67_007912	6.53e-146	40.5	hr_pks	sp|G3XMD1|AZAB_ASPNA	7.04e-257	29.9	sp|G3XMD1|AZAB_ASPNA Highly reducing polyketide synthase azaB OS=Aspergillus niger (strain ATCC 1015 / CBS 113.46 / FGSC A1144 / LSHB Ac4 / NCTC 3858a / NRRL 328 / USDA 3528.7) OX=380704 GN=azaB PE=1 SV=1	Colletotrichum_sidae__gene-C8034_v011011
[truncated: 14,553 more rows]
